# Supplementary material for: A Comparative Performance Study of Retrieval-Augmented Generation Systems in Gynecologic Oncology
Source: Research Square preprint supplement (doi:10.21203/rs.3.rs-8221196/v1), 2025-12-22
Supplement: Supplementary file 1 [file 3deaf0fed40a000e650a6d7e.docx]

# Table 1 Responses Of Optimal Chunksize Validation Experienment

| **RAG Systems** | **Response** | **Assessments** | | |
| --- | --- | --- | --- | --- |
| **Reviewer 1** | **Reviewer 2** | **Final** |
| **Question 1: What is the examination process for HPV-positive high-risk types?** | | | | |
| Chunk size=512, Overlap=0 Using TokenTextSplitter | The examination process for high-risk HPV-positive patients is as follows (primarily based on the description of Figure 1 from the first document fragment):  - Starting point: Patient tests positive for HPV (HPV(+)). - First-level triage:  - If HPV genotyping has been performed: Proceed to the HPV genotyping result pathway.  - HPV16/18 positive: Immediate referral for colposcopy.  - HPV16/18 negative or positive for one of the other 12 types: Perform cervical cytology.  - If genotyping has not been performed (non-genotyped HPV): Proceed directly to the cytology pathway. - Cytology pathway (applies to all patients requiring cytology triage):  - Cytology result ≥ ASC-US (including ASC-US, LSIL, HSIL, etc.): Refer for colposcopy.  - Cytology result negative (-): Recommend co-testing (cytology + HPV) after 1 year. - Special pathways:  - Patients with non-genotyped HPV positive: Must undergo cytology (skipping the genotyping step).  - Patients positive for one of the other 12 types with negative cytology: Annual follow-up (colposcopy not required).  This process is supported by multiple document fragments (e.g., a fragment with 0.668 similarity details the Figure 1 process; a fragment with 0.524 similarity mentions the management of HPV positive/cytology negative cases). The process emphasizes the importance of genotyping testing and determines referral for colposcopy or follow-up based on genotyping results and cytology.  Key evidence: - "Figure 1: High-risk HPV-positive patients should follow the process below..." (similarity 0.668). - "When HPV genotyping shows HPV16 or 18 positivity, immediately refer for colposcopy..." (similarity 0.524). | A | A | A |
| Chunk size=256, Overlap=100 Using SentenceSplitter | the examination process for patients with high-risk HPV positivity is as follows (based primarily on the description in Figure 1):  - Starting point: The patient tests positive for high-risk HPV (HPV(+)). - First-level triage:  - If HPV genotyping has been performed → proceed to the HPV genotyping result pathway.  - If no genotyping has been done (HPV untested) → proceed directly to the cytology examination pathway. - HPV genotyping pathway:  - HPV16/18 positive → refer immediately for colposcopy.  - HPV16/18 negative or positive for other 12 types → undergo cervical cytology examination. - Cytology examination pathway (for all patients requiring cytology-based triage):  - Cytology result ≥ ASC-US (including ASC-US, LSIL, HSIL, etc.) → refer for colposcopy.  - Cytology result negative (-) → recommend repeating combined cytology + HPV testing after 1 year. - Special pathway:  - Patients with untyped HPV positivity → must undergo cytology examination (no genotyping, skip directly to cytology).  - Patients positive for other 12 types with negative cytology → annual follow-up (no colposcopy needed).  This process emphasizes using cytology examination as the basis for triage, especially when HPV is not genotyped. The document states that this process is based on Chinese clinical practice and recommends individualized management according to local medical conditions (e.g., "suggest referring to literature reports with sufficient clinical data validation"). | A | A | A |
| **Question 2: When the initial screening shows positive HPV with high-risk HPV types emphasizing that HPV is not typed, what is the next step in the examination?** | | | | |
| Chunk size=512, Overlap=0 Using TokenTextSplitter | when the initial screening shows HPV positive with high-risk HPV types, emphasizing that HPV is untyped, the next step is cervical cytology testing.  If the initial HPV screening is positive but untyped, the next examination is to proceed directly with cervical cytology. The document explicitly states that if HPV testing is untyped, the patient should skip genotyping and immediately enter the cytology pathway. The cytology result will determine subsequent management:  - If cytology is ≥ASC-US, refer for colposcopy. - If cytology is negative, recommend repeat co-testing (cytology + HPV) in 1 year.  This approach is based on risk stratification: untyped HPV positivity is considered higher risk and requires cytological triage to assess the need for colposcopy.  Key evidence:  - "If genotyping was not performed (HPV untyped) → directly enter the cytology pathway" (similarity 0.668). - "HPV not genotyped, it is suggested to combine with clinical symptoms and signs, and refer directly to colposcopy when necessary" (similarity 0.524); however, the document emphasizes that "when necessary" applies only if symptoms are present; in general, untyped HPV positivity prioritizes cytology testing. | A | A | A |
| Chunk size=256, Overlap=100 Using SentenceSplitter | when initial screening shows HPV positive with high-risk HPV types, emphasizing that HPV is untyped, the next step is cervical cytology examination.  Based on the document content, when HPV is positive but untyped, the next step is cervical cytology examination. The document explicitly states: - "When HPV is untyped, triage is based on cytology" (e.g., in the section "Using high-risk HPV as primary screening"). - In special pathways, it repeats: "Untyped HPV positive patient → must undergo cytology examination (skip directly without typing)". - Rationale: Untyped HPV cannot directly distinguish high-risk types (e.g., HPV16/18), so cytology is needed to further assess risk. If cytology is abnormal (≥ASC-US), refer to colposcopy; if cytology is negative, recommend annual follow-up. | A | A | A |
| **Question 3: When the initial screening shows positive HPV with high-risk HPV types and the cytological examination result is negative, what does it indicate? Should regular check-ups follow and if so, what should be the frequency?** | | | | |
| Chunk size=512, Overlap=0 Using TokenTextSplitter | When initial screening shows HPV positive with high-risk HPV types and cytology result is negative, this indicates: HPV infection is present but cytology shows no abnormal cells, placing the patient in a low-risk but not risk-free state. It typically represents a transient HPV infection with a low risk of cervical intraepithelial neoplasia grade 3 or worse (CIN3+) (5-year cumulative risk below threshold), but monitoring is required to prevent progression.  - Should regular follow-up be performed: Yes, regular follow-up is necessary.  - Follow-up frequency: Repeat co-testing (cytology + HPV) after 1 year. If the follow-up result is normal, return to routine screening; if abnormal, refer for colposcopy.   The document emphasizes: For HPV-positive/cytology-negative patients, if HPV genotyping identifies other 12 types (non-16/18), the risk is lower, and annual follow-up suffices; if genotyping is not performed or symptoms are suspicious, maintain the same follow-up frequency.   Key evidence:  - "Cytology result negative (-) → recommend repeating cytology + HPV co-testing after 1 year" (similarity 0.668).  - "Cytology (-) & HPV (+) → annual follow-up should be conducted (repeat co-testing after 1 year)" (similarity 0.507).  - "HPV positive / cytology negative... recommend 1-year follow-up" (similarity 0.524). | A | A | A |
| Chunk size=256, Overlap=100 Using SentenceSplitter | when the initial screening shows HPV positive with high-risk HPV types and a negative cytology result, this indicates:  - The patient is at a lower risk but not risk-free. A positive HPV test with negative cytology (e.g., "other 12 types positive and cytology negative") is associated with a low 5-year cumulative risk of CINⅢ+ (specific numerical values not provided in the excerpt, but described as low risk), typically not requiring immediate intervention but necessitating monitoring to prevent progression.   Should regular follow-up be performed?  - Yes.   Follow-up frequency:  - Repeat cytology and HPV co-testing after 1 year (i.e., annual follow-up). The document states multiple times:   - "Cytology result negative (-) → recommend repeating cytology + HPV co-testing after 1 year."   - In the co-testing workflow: "Cytology (-) & HPV (+) → perform 1-year follow-up (repeat co-testing after 1 year)."   - Special pathway: "Other 12 types positive and cytology negative → annual follow-up (no need for colposcopy)."  The purpose of follow-up is to monitor HPV clearance or lesion progression; if consecutive follow-ups remain negative, screening can revert to routine intervals. | A | A | A |
| **Question 4: When the initial screening shows positive HPV with high-risk HPV types and the cytological examination result is ≥ASC-US, is the next step to perform a colposcopy?** | | | | |
| Chunk size=512, Overlap=0 Using TokenTextSplitter | yes, the next step should be immediate referral for colposcopy. The document clearly states that regardless of HPV genotyping results, a cytology result ≥ ASC-US (including ASC-US, LSIL, HSIL, etc.) requires direct referral to colposcopy to evaluate for high-grade lesions or cancer risk.  This management is based on high-risk evidence: when HPV positivity is combined with cytology ≥ ASC-US, the 5-year cumulative risk of CIN3+ is elevated (document cites approximately 6.8%), supporting direct colposcopy.  Key evidence: - "Cytology result ≥ ASC-US (including ASC-US, LSIL, HSIL, etc. abnormalities) → refer for colposcopy" (similarity 0.668). - "HPV positive / ASC-US... based on equal risk equal management, supports direct referral to colposcopy" (similarity 0.524). | A | B | A |
| Chunk size=256, Overlap=100 Using SentenceSplitter | yes, colposcopy should be performed. The documentation explicitly supports this management: - In the cytology pathway: “Cytology result ≥ ASC-US (including ASC-US, LSIL, HSIL, etc.) → refer for colposcopy.” - In the co-testing algorithm: “Cytology ≥ ASC-US & HPV (+) warrants further triage,” and specifies that if HPV is untyped or typed positive for non-HPV16/18 types but cytology is ≥ ASC-US, referral for colposcopy is required (e.g., “If HPV untyped test is positive: refer directly for colposcopy”). - The documentation also notes that the prevalence of high-risk HPV infection in ASC-US patients is 31%~60%, and the 5-year cumulative risk of CINⅢ+ is 6.8%, higher than that for LSIL, supporting direct referral to colposcopy to exclude high-grade lesions. | A | A | A |
| **Question 5: When the initial screening shows positive HPV with high-risk HPV types and upon typing it turns out to be HPV16/18 positive, is the next step to perform a colposcopy?** | | | | |
| Chunk size=512, Overlap=0 Using TokenTextSplitter | yes, the next step should be immediate referral for colposcopy. The document emphasizes that HPV16/18 positivity is considered the highest-risk genotype, warranting direct referral to colposcopy regardless of cytology results (even if cytology is negative), to rule out high-grade lesions or early cancer.  This management is based on the high oncogenicity of HPV16/18: the document states these genotypes are associated with rapid progression to CINⅢ+, thus colposcopic evaluation is performed directly without reliance on cytology.  Key evidence:  - "HPV16/18 positive → immediate referral for colposcopy" (similarity 0.668). - "HPV genotyping positive for HPV16/18, immediate referral for colposcopy" (similarity 0.524). - "Cytology ≥ ASC-US & HPV positive... if HPV genotyping is positive: HPV16/18 positive → immediate referral for colposcopy" (similarity 0.507), but the document explicitly states that colposcopy is required for HPV16/18 positivity even with negative cytology. | A | A | A |
| Chunk size=256, Overlap=100 Using SentenceSplitter | yes, immediate colposcopy should be performed. The document emphasizes in multiple sections: - In the HPV genotyping pathway: “HPV16/18 positive → immediately refer for colposcopy”. - In the management flow, repeated: “HPV16/18 positive → immediately refer for colposcopy”. - Rationale: HPV16/18 are high-risk genotypes significantly associated with high-grade cervical lesions (such as CINⅢ) and invasive cancer risk (the document states “probability of being diagnosed with ≥CINⅢ is 70%~75%”), thus requiring urgent evaluation for early intervention. | A | A | A |
| **Question 6: When the initial screening shows positive HPV with high-risk HPV types and upon typing it shows neither HPV16/18 positive but one of the other twelve types, what is the most likely subsequent examination?** | | | | |
| Chunk size=512, Overlap=0 Using TokenTextSplitter | When initial screening shows HPV-positive with high-risk HPV types, and genotyping reveals neither HPV16/18 positivity but belongs to one of the other twelve types, the most likely follow-up test is cervical cytology examination.  According to the document content: - HPV genotyping pathway: HPV16/18 negative or other 12 types positive → proceed with cervical cytology examination - HPV16/18 negative but other 12 high-risk HPV types positive → proceed with cervical cytology examination  Therefore, the follow-up test is cervical cytology examination. | A | A | A |
| Chunk size=256, Overlap=100 Using SentenceSplitter | When initial screening shows HPV positivity with high-risk HPV types, and genotyping reveals positivity for one of the other twelve types (not HPV16/18), what is the most likely follow-up test?  Response: According to the document content, when HPV genotyping shows positivity for one of the other 12 high-risk HPV types (not HPV16/18) and cytology results are negative, the most likely follow-up test is repeat co-testing (cytology and HPV) after 1 year (annual follow-up), without immediate colposcopy.   - Supporting evidence:   - In [similarity: 0.696] fragment: "Positivity for other 12 types with negative cytology → annual follow-up (no colposcopy needed)".   - In [similarity: 0.634] fragment: "During HPV genotyping...other 12 types(+)...cytology(-)...follow-up after 1 year".   - In [similarity: 0.597] fragment: "If cytology(-) & HPV(+), then follow-up after 1 year (repeat co-testing after 1 year)".   - Explanation: The document clearly states that for patients with positivity for non-HPV16/18 high-risk HPV types (other 12 types) and negative cytology, the management approach is annual follow-up (i.e., repeat co-testing after 1 year) rather than immediate referral for colposcopy. This is based on risk stratification, as such cases carry lower risk. | A | A | A |
| **Question 7: When cytological examination indicates ASC-US as an abnormal initial screening result, what is the next step in the examination?** | | | | |
| Chunk size=512, Overlap=0 Using TokenTextSplitter | When cytology results show ASC-US as the initial abnormal screening finding, the next step is to perform HPV testing for triage.  → Patients with ASC-US: HPV testing should be performed first.  → Patients with ASC-US should undergo HPV testing initially.  Therefore, the next step is HPV testing to determine whether referral for colposcopy or follow-up monitoring is required. | A | A | A |
| Chunk size=256, Overlap=100 Using SentenceSplitter | When cytology results show ASC-US as the initial abnormal screening finding, the next step is to perform HPV testing for triage.   - Supporting Evidence:   - In [Similarity: 0.696] fragment: "Patients with ASC-US: HPV testing should be performed first."   - In [Similarity: 0.725] fragment: "Use HPV testing for triage of ASC-US."   - In [Similarity: 0.634] fragment: "Cytology (ASC-US) & HPV (-) should undergo follow-up in 1 year," which implies HPV testing is the first step in triage.   - Explanation: The documents consistently indicate that ASC-US is a common type of cytological abnormality, and its management process uses HPV testing as the initial triage tool to determine subsequent management (such as referral for colposcopy or follow-up). | A | A | A |
| **Question 8: When cytological examination indicates ASC-US as an abnormal initial screening result and HPV is used for triage, if HPV is positive, should a colposcopy follow?** | | | | |
| Chunk size=512, Overlap=0 Using TokenTextSplitter | yes, colposcopy should be performed. The documents explicitly state that when ASC-US is the initial abnormal screening result and HPV testing is used for triage, a positive HPV result warrants referral for colposcopy. For example, one document states: "ASC-US patients: HPV testing should be performed first; if HPV positive (+) → refer for colposcopy." Another document supports this: "HPV positive/ASC-US has a cumulative 5-year risk of CIN 3+ of 6.8%, higher than that of LSIL; based on equal risk equal management, direct referral to colposcopy is supported." Therefore, colposcopy is necessary when HPV is positive. | A | A | A |
| Chunk size=256, Overlap=100 Using SentenceSplitter | yes, according to the document content, when cytology shows ASC-US and HPV testing is used for triage, if the HPV test result is positive (regardless of genotyping), referral for colposcopy should be performed.  - supporting evidence:  - in the [similarity: 0.696] segment: "if HPV positive (+) → refer for colposcopy".  - in the [similarity: 0.725] segment: "for ASC-US using HPV for triage, if HPV positive (not genotyped) or HPV genotyping detects HPV16/18 positive, referral for colposcopy should be performed".  - in the [similarity: 0.634] segment: "HPV positive / ASC-US ... supports direct referral to colposcopy". - explanation: the document emphasizes that HPV positivity (including untyped or any high-risk type) combined with an ASC-US result carries a higher risk of CIN 3+, thus necessitating colposcopy referral to rule out high-grade lesions. | A | A | A |
| **Question 9: When cytological examination indicates ASC-US as an abnormal initial screening result and HPV is used for triage, if HPV is negative, what should be the subsequent examination?** | | | | |
| Chunk size=512, Overlap=0 Using TokenTextSplitter | when cytology shows ASC-US as an abnormal initial screening result and HPV testing is used for triage, if HPV is negative, the follow-up should be:  → Repeat cytology in 1 year.  According to the source document: "ASC-US patients: First perform HPV testing: if HPV negative (−) → repeat cytology should be done in 1 year." If the repeat cytology result is negative, return to routine screening; if the result is ≥ASC-US, refer for colposcopy. Therefore, the follow-up is cytology repeated at 1 year. | A | A | A |
| Chunk size=256, Overlap=100 Using SentenceSplitter | When cytology shows ASC-US as an abnormal initial screening result and HPV testing is used for triage, if HPV is negative, the follow-up should be:  - Repeat cytology in 1 year (if the repeat result is abnormal, further management is required).   - Supporting evidence:  - In the [similarity: 0.696] excerpt: "If HPV is negative (-) → repeat cytology should be performed in 1 year; if the repeat result is negative, continue with routine screening; if the result is ASC or higher, perform colposcopy."  - In the [similarity: 0.634] excerpt: "Cytology (ASC-US) & HPV (-): 1-year follow-up should be performed (repeat co-testing in 1 year)."  - In the [similarity: 0.597] excerpt: "Cytology (ASC-US) & HPV (-): 1-year follow-up should be performed."   - Explanation: A negative HPV result indicates low risk, so the management is to repeat cytology (or co-testing) in 1 year to monitor for changes; if the repeat is normal, return to routine screening. | A | A | A |
| **Question 10: When cytological examination results show ASC-H, LSIL, or HSIL, is a colposcopy needed next?** | | | | |
| Chunk size=512, Overlap=0 Using TokenTextSplitter | yes, colposcopy is required.  The documents explicitly state that patients with cytology results of ASC-H, LSIL, or HSIL should be directly referred for colposcopy. For example, one document fragment notes: "Other abnormal types (ASC-H, LSIL, HSIL, AGC, and ASC-US patients after one-year follow-up): direct referral for colposcopy." Another fragment emphasizes: "Cytology results ≥ ASC-US (including ASC-US, LSIL, HSIL, etc.) → refer for colposcopy." Additionally, it is stated: "ASC-H, LSIL, HSIL, AGC with abnormal cytology should all be referred for colposcopy." Therefore, ASC-H, LSIL, and HSIL all require colposcopy. | A | A | A |
| Chunk size=256, Overlap=100 Using SentenceSplitter | yes, according to the document, when cytology results show ASC-H, LSIL, or HSIL, referral for colposcopy is required.  - Supporting evidence:  - In the [similarity: 0.725] excerpt: "For cytological abnormalities including ASC-H, LSIL, HSIL, and AGC, all should be referred for colposcopy."  - In the [similarity: 0.696] excerpt: "Patients with other abnormal types (ASC-H, LSIL, HSIL) are directly referred for colposcopy."  - In the [similarity: 0.390] excerpt: "For cytological abnormalities including ASC-H, LSIL, HSIL, and AGC, all should be referred for colposcopy." - Explanation: The document clearly states that these cytological abnormalities (ASC-H, LSIL, HSIL) carry a high risk of CIN diagnosis (e.g., ASC-H has a 24%~94% probability of being diagnosed as CIN II/III, LSIL has a 10%~16% probability of ≥CIN I), therefore direct referral for colposcopy is necessary for histological evaluation. | A | A | A |
| **Question 11: When cytological examination results show AGC, what is the next examination required?** | | | | |
| Chunk size=512, Overlap=0 Using TokenTextSplitter | when a cytology result shows AGC (atypical glandular cells), the following examinations are required:  - Referral for colposcopy: direct referral is indicated. - Additional cervical canal scraping (ECC): to evaluate lesions within the endocervical canal. - Additional HPV testing: to confirm high-risk HPV infection status. - Additional endometrial biopsy: to exclude endometrial-related lesions.  Document reference: [Similarity: 0.552] The excerpt states: "Patients with other abnormal types (ASC-H, LSIL, HSIL, AGC, and ASC-US patients after one-year follow-up): direct referral for colposcopy, among which AGC patients require: additional cervical canal scraping (ECC), additional HPV testing, additional endometrial biopsy." This clearly specifies the management protocol for AGC. | A | A | A |
| Chunk size=256, Overlap=100 Using SentenceSplitter | when a cytology result shows AGC (Atypical Glandular Cells), the following examinations are required:  - Direct referral for colposcopy: The document explicitly states that patients with AGC must be referred directly for colposcopy (similarity 0.739 segment: "Other abnormal types (ASC-H, LSIL, HSIL, AGC, and ASC-US patients after one-year follow-up): direct referral for colposcopy").  - Perform endocervical curettage (ECC): AGC patients require additional ECC to assess lesions within the endocervical canal (similarity 0.739 segment: "Among them, AGC patients need: perform endocervical curettage (ECC)").  - Perform HPV testing: AGC patients must undergo HPV testing to evaluate HPV infection status (similarity 0.739 segment: "perform HPV testing").  - Perform endometrial biopsy: When there is suspicion of endometrial cancer risk, endometrial biopsy should be performed (similarity 0.458 segment: "For AGC, particular emphasis is placed on performing endocervical curettage; when endometrial cancer risk is suspected, endometrial biopsy should be done and sent for pathological examination").  In summary, management of AGC includes referral for colposcopy, ECC, HPV testing, and possible endometrial biopsy. | A | A | A |
| **Question 12: If both cytological and high-risk HPV joint tests show negative results, what other examination should follow?** | | | | |
| Chunk size=512, Overlap=0 Using TokenTextSplitter | if both cytology and high-risk HPV testing show negative results, routine screening should be continued according to the standard screening interval (e.g., every 3 or 5 years). No additional tests are required.  Document reference: [Similarity: 0.552] "HPV negative/cytology negative, risk is 0.08%... repeat cervical cancer screening in 3 years"; [Similarity: 0.457] "cytology (-) & HPV (-) → conduct routine screening (continue screening at regular intervals)". The document does not mention the need for any other additional examinations. | A | A | A |
| Chunk size=256, Overlap=100 Using SentenceSplitter | if both cytology and high-risk HPV testing are negative, no additional tests (such as colposcopy or biopsy) are required. instead, routine screening should be continued according to the recommended interval:  - routine screening (continue screening at the standard interval): the document specifies that this result should enter the routine screening process, with screening intervals of 3 years or 5 years (similarity 0.667 segment: "cytology (-) & HPV (-) should proceed with routine screening (continue screening at the standard interval)"; similarity 0.577 segment: "HPV negative/cytology negative carries a risk of $0.08\%$, suggesting that a longer screening interval (e.g., 5 years) may be chosen").  therefore, only routine screening at the appropriate interval is indicated, with no other examinations necessary. | A | B | A |
| **Question 13: If joint testing of cytology and high-risk HPV shows HPV-negative and the cytological result is ASC-US, what should be done next?** | | | | |
| Chunk size=512, Overlap=0 Using TokenTextSplitter | if cytology and high-risk HPV co-testing show HPV negative and cytology result of ASC-US, the next step should be:  Perform a repeat co-test (cytology and high-risk HPV) after 1 year.  → If the repeat test result is negative: return to routine screening.  → If the repeat test result is abnormal (≥ASC-US): refer for colposcopy.  Document reference: [Similarity: 0.457] The source explicitly states: "Cytology (ASC-US) & HPV (-) → should undergo 1-year repeat (repeat co-testing after 1 year)." No other management is specified in the document. | A | A | A |
| Chunk size=256, Overlap=100 Using SentenceSplitter | if cytology and high-risk HPV co-testing show HPV negative and cytology result of ASC-US, the next step should be:  According to the document, if HPV is negative and cytology is ASC-US, the next step is to perform a 1-year follow-up (repeat co-testing with cytology and high-risk HPV after 1 year): - 1-year follow-up (repeat co-testing after 1 year): The document explicitly states that this result combination should undergo repeat co-testing (cytology + high-risk HPV) after 1 year, with no immediate referral for colposcopy (similarity 0.667 segment: "cytology (ASC-US) & HPV (-) should undergo 1-year follow-up (repeat co-testing after 1 year)"; similarity 0.555 segment: "cytology (ASC-US) & HPV (-) should undergo 1-year follow-up (repeat co-testing after 1 year)"). After follow-up, if the results are abnormal, management should be based on the new findings (such as referral for colposcopy). | A | A | A |
| **Question 14: If joint testing of cytology and high-risk HPV shows HPV-negative and the cytological result is >ASC-US, what should be done next? Is a colposcopy required?** | | | | |
| Chunk size=512, Overlap=0 Using TokenTextSplitter | no  If cotesting (cytology and high-risk HPV) shows HPV negative and cytology result > ASC-US (e.g., LSIL, HSIL), the next step is immediate referral for colposcopy.  Colposcopy is required to evaluate for potential high-grade lesions.   Document reference: [Similarity: 0.457]  The fragment explicitly states: "For cytology > ASC-US (e.g., LSIL, HSIL) & HPV (-), immediate referral for colposcopy is required." Therefore, colposcopy is needed. | A | A | A |
| Chunk size=256, Overlap=100 Using SentenceSplitter | no  If cytology and high-risk HPV co-testing show HPV negative and cytology result > ASC-US, the next step should be: immediate referral for colposcopy.  - Immediate referral for colposcopy: The document explicitly states that this result combination must be referred for colposcopy (similarity 0.667 segment: "cytology > ASC-US (such as LSIL, HSIL, etc.) & HPV (-) should be immediately referred for colposcopy"; similarity 0.555 segment: "cytology > ASC-US (such as LSIL, HSIL, etc.) & HPV (-) should be immediately referred for colposcopy").  Yes, colposcopy is required because a cytology result > ASC-US (such as LSIL or HSIL) indicates a higher risk of high-grade lesions, and colposcopic evaluation is necessary to rule out precancer or cancer even when HPV is negative. | A | A | A |
| **Question 15: In cervical cancer detection, if joint testing of cytology and high-risk HPV shows HPV-positive and the cytological result is ≥ASC-US, what specific examinations should follow?** | | | | |
| Chunk size=512, Overlap=0 Using TokenTextSplitter | in cervical cancer screening, if co-testing (cytology and high-risk HPV) shows HPV positive and cytology result ≥ ASC-US, the following specific actions should be taken based on HPV genotyping results:  - If HPV genotyping has been performed:  - HPV16/18 positive: refer immediately for colposcopy.  - HPV16/18 negative but positive for other 12 high-risk HPV types: recommend repeat co-testing in 1 year. - If HPV genotyping has not been performed (HPV positive, ungenotyped): refer directly for colposcopy.  Document reference: [Similarity: 0.457] The source explicitly states: "Cytology ≥ ASC-US & HPV (+) should undergo further triage based on HPV genotyping results: - If HPV genotyping test positive: * HPV16/18 positive → immediate colposcopy referral * HPV16/18 negative but other 12 high-risk HPV types positive → 1-year follow-up - If HPV ungenotyped positive: refer directly for colposcopy." No other specific tests are mentioned; decisions are based solely on genotyping results. | A | A | A |
| Chunk size=256, Overlap=100 Using SentenceSplitter | in cervical cancer screening, if co-testing (cytology and high-risk HPV) shows HPV positive and cytology result ≥ ASC-US, the following specific examinations should be performed:  - Based on HPV genotyping results:  - If HPV genotyping is positive:  - HPV16/18 positive → refer immediately for colposcopy  - HPV16/18 negative but positive for other 12 high-risk HPV types → follow-up in 1 year  - If HPV testing was not genotyped and is positive → refer directly for colposcopy  In summary, specific examinations include HPV genotyping (if not previously performed), followed by either immediate referral for colposcopy or 1-year follow-up based on genotyping results. The document emphasizes that genotyping is a key step. | A | A | A |
| **Question 16: In cervical cancer detection, if joint testing of cytology and high-risk HPV shows HPV-positive and the cytological result is negative, what specific examinations should follow?** | | | | |
| Chunk size=512, Overlap=0 Using TokenTextSplitter | in cervical cancer screening, if combined cytology and high-risk HPV testing shows HPV positive and cytology negative, the following specific examinations should be performed:  - If HPV genotyping is available:  - HPV16/18 positive: refer immediately for colposcopy.  - HPV16/18 negative but positive for other 12 high-risk HPV types: recommend repeating combined cytology and HPV testing after 1 year (i.e., annual follow-up). - If HPV testing is not genotyped (i.e., no typing performed): suggest combining with clinical symptoms and signs, and refer directly for colposcopy when necessary.  Summary of specific examination steps:  1. Prioritize HPV genotyping testing (if not already performed). 2. Based on genotyping results:  - HPV16/18 positive → colposcopy.  - Other 12 types positive → repeat combined testing (cytology + HPV) after 1 year. 3. If no genotyping → refer directly for colposcopy when necessary (based on clinical judgment, as emphasized in the document).  Document reference: Fragment with similarity 0.620 states "2.3.3 HPV positive / cytology negative: ① If HPV genotyped and HPV16, 18 positive, refer immediately for colposcopy; ② If HPV not genotyped, suggest combining with clinical symptoms and signs, refer directly for colposcopy when necessary"; fragment with similarity 0.623 states "4. Cytology (−) & HPV (+) then perform 1-year follow-up." | A | A | A |
| Chunk size=256, Overlap=100 Using SentenceSplitter | in cervical cancer screening, if cytology and high-risk HPV co-testing show HPV positive and cytology negative, the following specific management should be performed:  - If HPV genotyping is performed and the result is HPV16/18 positive, immediate referral for colposcopy is indicated (see [similarity: 0.535] and [similarity: 0.613]). - If HPV genotyping shows positivity for other 12 high-risk types (non-HPV16/18), or if genotyping is not performed (HPV untyped), repeat co-testing (cytology + high-risk HPV) should be conducted after 1 year (see [similarity: 0.526], [similarity: 0.611], and [similarity: 0.613]). - Specifically for this scenario (genotyping not specified), the general recommendation is to perform repeat co-testing after 1 year. The document states: “Cytology (−) & HPV (+) → perform 1-year follow-up (repeat co-testing after 1 year)” ([similarity: 0.613]).  Answer: Repeat cytology + high-risk HPV co-testing after 1 year should be performed. If HPV genotyping is positive for HPV16/18, immediate referral for colposcopy is indicated; if untyped or positive for other 12 high-risk types, manage with 1-year follow-up. | A | A | A |
| **Question 17: In cervical cancer detection, if joint testing of cytology and high-risk HPV shows HPV-positive and the cytological result is negative, and the HPV typing is HPV16/18 positive, what specific examinations should follow?** | | | | |
| Chunk size=512, Overlap=0 Using TokenTextSplitter | in cervical cancer screening, if cytology and high-risk HPV co-testing show HPV positive and cytology negative, with HPV genotyping positive for HPV16/18, the specific examination that should be performed is:  - immediate referral for colposcopy.   Specific examination: perform colposcopy directly, without any other preliminary tests.   Document basis: fragment with similarity 0.620 states "HPV genotyping positive for HPV16/18, refer immediately for colposcopy" and fragment with similarity 0.623 describes in Figure 3 "HPV16/18 positive → refer immediately for colposcopy". | A | A | A |
| Chunk size=256, Overlap=100 Using SentenceSplitter | In cervical cancer screening, if co-testing (cytology and high-risk HPV) shows HPV positive and cytology negative, and HPV genotyping is positive for HPV16/18, the specific action recommended is:  Immediate referral for colposcopy.  The document explicitly states that when co-testing reveals HPV positivity with negative cytology and HPV genotyping identifies HPV16/18 positivity, immediate colposcopic evaluation is required. This is because HPV16/18 are high-risk genotypes strongly associated with cervical cancer risk, necessitating direct colposcopy to rule out high-grade lesions or cancer (see [similarity: 0.535], [similarity: 0.613], and [similarity: 0.611]). For example: - “HPV genotyping positive for HPV16/18 → immediate referral for colposcopy” ([similarity: 0.535]). - “If HPV genotyping is positive: * HPV16/18 positive → immediate referral for colposcopy” ([similarity: 0.613]).  Answer: Immediate referral for colposcopy should be performed. | A | B | A |
| **Question 18: In cervical cancer detection, if a patient has joint testing of cytology and high-risk HPV showing HPV-positive, the cytological result is negative, and there's no typing for HPV16 or HPV18, are there any other tests needed?** | | | | |
| Chunk size=512, Overlap=0 Using TokenTextSplitter | yes, additional examinations are required based on the HPV genotyping status:  - if genotyping shows positivity for other 12 high-risk HPV types (excluding HPV16/18) → perform repeat co-testing (cytology + HPV) after 1 year  - if HPV genotyping was not performed → refer for colposcopy examination   document references:  - similarity 0.620: "HPV positive / cytology negative: ...② HPV not genotyped, suggest direct referral for colposcopy"  - similarity 0.623: "HPV16/18 negative but other 12 high-risk HPV types positive → 1-year follow-up" | A | A | A |
| Chunk size=256, Overlap=100 Using SentenceSplitter | no  If the patient's cytology is negative and high-risk HPV is positive, but without HPV16 or HPV18 genotyping:  - If high-risk HPV genotyping was performed and shows positivity for other 12 high-risk types (non-HPV16/18): schedule repeat co-testing (cytology + HPV) after 1 year; no immediate additional tests are required.  - If HPV genotyping was not performed (i.e., HPV test result is untyped): refer directly for colposcopy, as untyped status cannot exclude high-risk types.  No additional examinations (e.g., imaging) are indicated beyond the above steps based on the provided guidelines. | D | D | D |
| **Question 19: In cervical cancer screening, if a patient has a histopathological confirmation (biopsy) of LSIL cytology findings of LSIL or higher and a TZ3 classification, what follow-up steps should be conducted?** | | | | |
| Chunk size=512, Overlap=0 Using TokenTextSplitter | in cervical cancer screening, if the patient's histopathology (biopsy) confirms LSIL, the cytology finding is LSIL or higher, and the transformation zone is classified as TZ3, the following follow-up steps should be taken:  - After histopathological confirmation of LSIL, management depends on the cytology result level:  - If the cytology result is LSIL (low-grade) or lower (≤LSIL): for TZ3 classification (transformation zone not visible), an endocervical curettage (ECC) should be performed, and subsequent management should be based on the ECC results (e.g., histological diagnosis grade).  - If the cytology result is ASC-H or higher (≥ASC-H): for TZ3 classification, refer for colposcopy or proceed directly to diagnostic conization.  Summary of follow-up steps:  1. Evaluate the specific cytology grade:  - Cytology ≤ LSIL → perform ECC.  - Cytology ≥ ASC-H → refer for colposcopy or diagnostic conization. 2. Subsequent management is based on ECC or biopsy results (e.g., continued follow-up if no invasive cancer is found).  Document basis: the segment with similarity 0.411 states "histopathologically confirmed LSIL... if cytology ≤ LSIL... if the patient is TZ3 type, then the patient should undergo endocervical curettage (ECC)" and "if cytology ≥ ASC-H... TZ3 → colposcopy"; the segment with similarity 0.371 adds the option of diagnostic conization. | A | A | A |
| Chunk size=256, Overlap=100 Using SentenceSplitter | no.  - If HPV genotyping was performed and the result is positive for one of the other 12 high-risk HPV types (not HPV16/18): perform repeat co-testing (cytology + HPV) after 1 year; no immediate additional tests are required. - If HPV genotyping was not performed (i.e., HPV test is positive but not typed): refer directly for colposcopy.  No additional examinations (such as imaging) are indicated beyond the above management based on HPV genotyping status. | A | A | A |
| **Question 20: In cervical cancer screening, if a patient has a histopathological confirmation (biopsy) of LSIL cytology findings of LSIL or lower and a TZ1/2 classification, what follow-up steps should be conducted?** | | | | |
| Chunk size=512, Overlap=0 Using TokenTextSplitter | in cervical cancer screening, if the patient's histopathology (biopsy) confirms LSIL, cytology findings are LSIL or lower grade (≤LSIL), and the transformation zone is classified as TZ1/2, the following follow-up steps should be taken:  - enter an observation follow-up pathway - perform a repeat examination (including cytology and colposcopy) every 6 to 12 weeks to closely monitor and rule out invasive cancer - if two consecutive repeat examinations are negative (no abnormalities), transition to routine screening (e.g., co-testing every 3–5 years)  document basis: the fragment with similarity 0.411 states: "histopathology confirmed LSIL... cytology ≤LSIL (low-grade lesion); if the patient's TZ typing is TZ1 or TZ2: then enter the observation follow-up pathway: repeat every 6~12 weeks (close monitoring, exclude invasive cancer). If two consecutive repeats are negative → transition to routine screening." | A | A | A |
| Chunk size=256, Overlap=100 Using SentenceSplitter | for patients with histologically confirmed LSIL (biopsy), cytological findings of LSIL or lower grade, and TZ classification of TZ1/2 (transformation zone partially or fully visible), the recommended follow-up steps are:  - Perform repeat evaluation (including cytology and colposcopy) every 6 to 12 weeks to closely monitor and exclude invasive cancer (see [similarity: 0.424]: "If cytology ≤ LSIL ... and TZ typing is TZ1 or TZ2: enter the observation follow-up pathway: § repeat every 6~12 weeks (close monitoring, exclude invasive cancer)"). - If two consecutive repeat tests are negative (no abnormality), transition to routine screening (see [similarity: 0.424]: "If two consecutive repeat tests are negative → transition to routine screening"; [similarity: 0.448]: "TZ1/2 observe (recheck in 6~12 months)"). - The document emphasizes this pathway applies to non-special populations (e.g., non-pregnant or young patients) and is based on risk management principles.  answer: Repeat evaluation (including cytology and colposcopy) every 6 to 12 weeks to closely monitor and exclude invasive cancer. If two consecutive repeat tests are negative, transition to routine screening. | A | A | A |
| **Question 21: In cervical cancer screening, if a patient has a histopathological confirmation (biopsy) of LSIL cytology findings of ASC-H or higher, what follow-up steps should be conducted?** | | | | |
| Chunk size=512, Overlap=0 Using TokenTextSplitter | in cervical cancer screening, if a patient has histologically confirmed LSIL (biopsy) and cytological findings of ASC-H or higher, the following follow-up steps should be taken:  response: according to the document context (similarity 0.502 and 0.407), for patients with histologically confirmed LSIL and cytological results of ASC-H or higher (≥ASC-H), assuming non-special populations (i.e., general patients, age not 21–24 years and not pregnant), the management process depends on the cervical transformation zone type (TZ), which must be determined by colposcopy. the specific steps are as follows:  - first, perform colposcopy to assess TZ type.  - if colposcopy shows TZ3 (transformation zone not visible), refer for colposcopy (may include further evaluation or biopsy).  - if colposcopy shows TZ1/2 (transformation zone partially or fully visible), perform diagnostic conization ± endocervical curettage (ECC).  - source: "figure 4: management flowchart for histologically confirmed LSIL... if cytology ≥ ASC-H (suggesting possible high-grade lesion) o non-special population (general patients): → manage according to transformation zone type (TZ): § TZ3 (transformation zone not visible) → colposcopy. § TZ1/2 (transformation zone partially/fully visible) → diagnostic conization ± endocervical curettage (ECC)." (similarity 0.502) | A | A | A |
| Chunk size=256, Overlap=100 Using SentenceSplitter | in cervical cancer screening, if a patient has histologically confirmed LSIL (by biopsy) and cytological findings of ASC-H or higher, the following follow-up steps should be taken:  according to the document, for general patients (not aged 21–24, not pregnant), with histologically confirmed LSIL but cytology ≥ ASC-H, management depends on the cervical transformation zone (TZ) type: - if TZ type is TZ3 (transformation zone not visible), perform colposcopy (document fragment 1: "non-special population (general patients): → manage according to transformation zone type (TZ): § TZ3 (transformation zone not visible) → colposcopy."). - if TZ type is TZ1/2 (transformation zone partially or fully visible), perform diagnostic conization ± endocervical curettage (ECC) (document fragment 1: "§ TZ1/2 (transformation zone partially/fully visible) → diagnostic conization ± endocervical curettage (ECC)."). the document does not specify management when TZ type is unknown; therefore, colposcopic assessment of TZ type should be performed first. this approach prioritizes cytology ≥ ASC-H, as ASC-H suggests possible high-grade lesion, requiring more aggressive intervention to rule out invasive cancer. | A | B | A |
| **Question 22: In cervical cancer screening, if a patient aged 21 to 24 years has a histopathological confirmation (biopsy) of LSIL cytology findings of ASC-H or higher, what follow-up steps should be conducted?** | | | | |
| Chunk size=512, Overlap=0 Using TokenTextSplitter | In cervical cancer screening, for patients aged 21 to 24 with histologically confirmed (biopsy) LSIL and cytological findings of ASC-H or higher, the following follow-up steps should be taken:  - First, perform colposcopy to assess the transformation zone (TZ) type. - If colposcopy shows TZ3 (transformation zone not visible), proceed directly to diagnostic/therapeutic cervical excision. - If colposcopy shows TZ1/TZ2 (transformation zone partially or fully visible), observation with follow-up is appropriate, with cytology and colposcopy repeated every 10–12 weeks to closely monitor lesion progression.  Source: "For special populations with cytology ≥ ASC-H: § Patients aged 21–24 should undergo colposcopy only. If colposcopy shows TZ3 type, diagnostic cervical conization should be performed. If colposcopy shows..." (similarity 0.502) and "a. If the patient is aged 21–24 and has cervical transformation zone type TZ1/TZ2, observation (with repeat every 10–12 weeks) is indicated... b. If the patient is aged 21–24 and has cervical transformation zone type TZ3, diagnostic/therapeutic cervical excision should be performed directly..." (similarity 0.474). | B | B | B |
| Chunk size=256, Overlap=100 Using SentenceSplitter | in cervical cancer screening, for patients aged 21 to 24 with histologically confirmed (biopsy) LSIL and cytology findings of ASC-H or higher, the following follow-up steps should be taken:  according to the document, for this special population aged 21–24 with histologically confirmed LSIL but cytology ≥ASC-H, colposcopy should be performed directly, and further management should be based on the colposcopic findings (document fragment 5: "o for special populations with cytology ≥ASC-H: § patients aged 21~24 should undergo colposcopy only."). subsequent steps depend on the transformation zone (TZ) type observed during colposcopy: - if the colposcopy result is TZ3 type, diagnostic cervical conization should be performed (document fragment 5: "if the colposcopy result is TZ3 type, diagnostic cervical conization should be performed."). - if the colposcopy result is TZ1 or TZ2 type, the patient should undergo follow-up every 6–12 weeks (including cytology and colposcopy) for close monitoring and to exclude invasive cancer; if two consecutive follow-ups are negative, transition to routine screening is recommended (document fragment 5: "if the colposcopy result is TZ1 or TZ2 type, the patient should be followed up every 6~12 weeks (close monitoring, exclude invasive cancer). if two consecutive follow-ups are negative, transition to routine screening should be done."). this approach for young patients (aged 21–24) prioritizes conservative monitoring to avoid overtreatment. | A | A | A |
| **Question 23: In cervical cancer screening, if a patient aged 21 to 24 years has a histopathological confirmation (biopsy) of LSIL cytology findings of ASC-H or higher and a TZ3 classification for colposcopy, what follow-up steps should be conducted?** | | | | |
| Chunk size=512, Overlap=0 Using TokenTextSplitter | for patients aged 21 to 24 with histologically confirmed LSIL (biopsy), cytological findings of ASC-H or higher, and a colposcopic classification of TZ3, the following follow-up step should be performed:  - Specific step: Proceed directly to diagnostic/therapeutic cervical conization. - Subsequent management: Based on pathological results, exclude invasive cancer and then transition to routine follow-up.  Source:  - "b. If the patient is aged 21–24 years and the cervical transformation zone type is TZ3, the patient should undergo diagnostic/therapeutic cervical conization directly..." (similarity 0.474) - "For special populations with cytology ≥ ASC-H: § Patients aged 21~24 years... if colposcopy shows TZ3 type, diagnostic cervical conization should be performed." (similarity 0.502) | B | A | A |
| Chunk size=256, Overlap=100 Using SentenceSplitter | for patients aged 21 to 24 with histologically confirmed LSIL (biopsy), cytology findings of ASC-H or higher, and a colposcopy classification of TZ3, the recommended follow-up step is to proceed directly to diagnostic cervical conization. This is because TZ3 indicates an invisible transformation zone, which increases the risk of missing high-grade lesions or invasive cancer, necessitating conization to obtain tissue for definitive diagnosis. The document does not specify post-procedure follow-up, but management would typically be guided by the histological results. | C | C | C |
| **Question 24: In cervical cancer screening, if a patient aged 21 to 24 years has a histopathological confirmation (biopsy) of LSIL cytology findings of ASC-H or higher and a TZ1/2 classification for colposcopy, what follow-up steps should be conducted?** | | | | |
| Chunk size=512, Overlap=0 Using TokenTextSplitter | for patients aged 21 to 24 years with histologically confirmed LSIL (biopsy), cytology findings of ASC-H or higher, and colposcopic classification of TZ1/2 (transformation zone partially or fully visible), the recommended follow-up is:  - Observation with repeat cytology and colposcopy every 6–12 weeks. - If no progression is observed on follow-up, continue surveillance. - If progression is noted or invasive cancer is detected, refer for treatment (e.g., diagnostic or therapeutic cervical excision).  - Note: This management strategy prioritizes conservative observation in young patients to minimize unnecessary surgical intervention. | A | B | A |
| Chunk size=256, Overlap=100 Using SentenceSplitter | for patients aged 21 to 24 with histologically confirmed LSIL (biopsy), cytology findings of ASC-H or higher, and colposcopy showing TZ1/2 classification, the following follow-up steps should be taken:  - Re-examination every 6 to 12 weeks, including cytology and colposcopy, to exclude invasive cancer (document fragment 5: "If the colposcopy result shows TZ1 or TZ2 type, the patient should undergo re-examination every 6 to 12 weeks (close monitoring to exclude invasive cancer)."). - If two consecutive re-examinations are negative, transition to routine screening (document fragment 5: "If two consecutive re-examinations are negative, the patient should transition to routine screening."). This management is based on the good visibility of TZ1/2 types, allowing conservative observation and avoiding unnecessary invasive procedures. | A | A | A |
| **Question 25: In cervical cancer screening, if a pregnant patient has a histopathological confirmation (biopsy) of LSIL cytology findings of ASC-H or higher, what follow-up steps should be conducted?** | | | | |
| Chunk size=512, Overlap=0 Using TokenTextSplitter | For pregnant patients with histologically confirmed LSIL (by biopsy) and cytological findings of ASC-H or higher (≥ASC-H), the follow-up steps are as follows:  - Specific steps: Repeat cytology and colposcopy every 10–12 weeks; perform postpartum follow-up at 6–8 weeks after delivery (cytology + colposcopy + ECC). - If no abnormalities are found on follow-up, transition to routine screening; if abnormalities are detected, manage according to the abnormal handling protocol.  Document sources: - "e. For pregnant patients, cytology and colposcopy should be performed every 10–12 weeks. If no invasive cancer is found, evaluation should be deferred until 6–8 weeks postpartum (cytology + colposcopy + ECC)." (similarity 0.474) - "Pregnant patients → should undergo close observation: • Repeat every 10~12 weeks (close monitoring to exclude invasive cancer). Perform follow-up at 6–8 weeks postpartum. If abnormalities are found on follow-up, manage according to the abnormal handling protocol. If no CIN is found, the patient should transition to routine screening thereafter." (similarity 0.444) | B | A | A |
| Chunk size=256, Overlap=100 Using SentenceSplitter | for pregnant patients with histologically confirmed LSIL (by biopsy) and cytological findings of ASC-H or higher, the following follow-up steps should be taken:  - Repeat examination every 10–12 weeks, including cytology and colposcopy (Document fragment 4: "e. For pregnant patients, cytology and colposcopy should be performed every 10–12 weeks." and Document fragment 5: "Pregnant patients → should undergo close monitoring: • Re-examine every 10–12 weeks (close surveillance to exclude invasive cancer)."). - If invasive cancer is not detected, defer re-evaluation until 6–8 weeks postpartum; the postpartum assessment should include cytology, colposcopy, and endocervical curettage (ECC) (Document fragment 4: "If invasive cancer is not detected, re-evaluation should be postponed until 6–8 weeks postpartum (cytology + colposcopy + ECC)."). - After postpartum follow-up:  - If no CINⅡ+ is found, transition to routine screening.  - If CINII+ is detected, perform diagnostic/therapeutic cervical excision, with subsequent management as previously outlined (Document fragment 4: "- If postpartum follow-up shows no CINⅡ+, patients should proceed to routine screening. - If postpartum follow-up reveals CINII+ → diagnostic/therapeutic cervical excision should be performed, with subsequent management as previously described.").  This approach prioritizes pregnancy safety by avoiding invasive procedures during gestation. | A | A | A |
| **Question 26: In cervical cancer screening, if a patient has a histopathological confirmation (biopsy) of HSIL and a TZ1/2 classification, what follow-up steps should be conducted?** | | | | |
| Chunk size=512, Overlap=0 Using TokenTextSplitter | For patients with histopathologically confirmed HSIL (including CIN II, CIN II/III, CIN III) and transformation zone type TZ1/2:  - Preferred management: Diagnostic/therapeutic cervical excision should be performed. If ablation therapy indications are met (e.g., localized lesion extent, no evidence of invasive cancer), cervical ablation therapy may be cautiously considered. - Postoperative follow-up steps:  - If postoperative pathological margins are negative (no CIN II or higher lesions): Re-examine after 4-6 months, including cytology, colposcopy, and endocervical curettage (ECC).  - If postoperative pathological margins are positive (CIN II or higher lesions present at margins): Re-examine cytology, colposcopy, and ECC after 4-6 months, and manage according to the corresponding lesion grade based on re-examination results (if progression occurs, transfer to treatment pathway).  - If suspicious invasive cancer is found during surgery: Immediately send for pathological confirmation; if confirmed, transfer to cervical cancer treatment pathway. - Basis: The document clearly states that diagnostic/therapeutic cervical excision should be the first choice for patients with histopathologically confirmed HSIL and cervical transformation zone type TZ1/2. | A | B | A |
| Chunk size=256, Overlap=100 Using SentenceSplitter | In cervical cancer screening, for a patient with histologically confirmed high-grade squamous intraepithelial lesion (HSIL, including CIN II, CIN II/III, CIN III, CIN II/P16(+)) and transformation zone type TZ1/2 (transformation zone fully or partially visible), the following follow-up steps should be taken:  - For general patients (not aged 21–24 years, not pregnant), diagnostic/therapeutic cervical excision is the preferred option. - Postoperative follow-up steps:  - If postoperative pathology shows negative margins (no residual lesion), a follow-up examination (cytology + colposcopy + endocervical curettage/ECC) should be performed at 4–6 months.  - If postoperative pathology shows positive margins (margin histopathology reports CIN II or higher), cytology, colposcopy, and ECC should be repeated at 4–6 months, and subsequent management should be based on the findings according to the corresponding lesion grade. - If the patient meets the criteria for ablative therapy (e.g., small lesion size, no evidence of invasion), cervical ablation may be considered with caution, though excision remains the preferred approach.  In summary, the follow-up steps are: prefer diagnostic/therapeutic cervical excision; postoperatively, based on margin status, schedule a 4–6 month follow-up (cytology + colposcopy + ECC) and adjust subsequent management according to results. | A | A | A |
| **Question 27: In cervical cancer screening, if a patient has a histopathological confirmation (biopsy) of HSIL and a TZ3 classification, what follow-up steps should be conducted?** | | | | |
| Chunk size=512, Overlap=0 Using TokenTextSplitter | in cervical cancer screening, if a patient has histopathologically confirmed HSIL (biopsy) and a TZ3 transformation zone classification, the following follow-up steps should be taken:  - Primary management: Direct diagnostic/therapeutic cervical conization should be performed (ablation therapy is not an option). - Postoperative follow-up:  - If postoperative pathology shows negative margins, perform a follow-up at 4–6 months including cytology, colposcopy, and endocervical curettage (ECC).  - If postoperative pathology shows positive margins (CIN II or higher), perform cytology, colposcopy, and ECC at 4–6 months, and manage according to the corresponding lesion grade based on follow-up results.  - If suspicious invasive cancer is found intraoperatively, send for immediate pathological confirmation; if confirmed, transition to cervical cancer treatment protocol. - Basis: The document explicitly states that “if a patient has histopathologically confirmed HSIL and a TZ3 transformation zone type, the patient should undergo direct diagnostic/therapeutic cervical conization (ablation therapy is not permitted).” | A | A | A |
| Chunk size=256, Overlap=100 Using SentenceSplitter | in cervical cancer screening, if a patient has histologically confirmed HSIL (biopsy) and a TZ3 transformation zone classification, the following follow-up steps should be taken:  based on the document content: - for general patients (not aged 21–24, not pregnant), if histologically confirmed as HSIL with transformation zone type TZ3 (transformation zone not visible), a diagnostic/therapeutic cervical conization should be performed directly (ablative therapy is not an option) ([similarity: 0.564]). - postoperative follow-up steps:  - if postoperative pathology shows negative margins, a follow-up examination (cytology + colposcopy + ECC) should be conducted at 4–6 months.  - if postoperative pathology shows positive margins (CINⅡ or higher), cytology, colposcopy, and ECC should be repeated at 4–6 months, and subsequent management should be based on the findings according to the corresponding lesion grade ([similarity: 0.484]). - the document emphasizes that TZ3 type does not permit observation or ablative therapy; direct surgery is mandatory ([similarity: 0.564]).  in summary, the follow-up steps are: proceed directly to diagnostic/therapeutic cervical conization; after surgery, arrange a 4–6 month follow-up (cytology + colposcopy + ECC) based on margin status; and adjust subsequent management according to the results. | A | A | A |
| **Question 28: In cervical cancer screening, if a patient aged 21 to 24 years has a histopathological confirmation (biopsy) of CIN III/HSIL, what follow-up steps should be conducted?** | | | | |
| Chunk size=512, Overlap=0 Using TokenTextSplitter | for patients aged 21 to 24 with histologically confirmed CIN III/HSIL, the follow-up steps depend on the transformation zone (TZ) type:  - if TZ type is TZ1/2:   - observation with follow-up (non-surgical management) may be chosen   - follow-up steps: cytology and colposcopy every 10–12 weeks   - if no progression is observed, continue surveillance   - if progression occurs or invasive cancer is detected, perform diagnostic/therapeutic cervical conization; post-procedure follow-up as previously described (e.g., if margins are negative, repeat testing in 4–6 months)  - if TZ type is TZ3:   - diagnostic/therapeutic cervical conization should be performed directly   - post-procedure follow-up steps: same as in Question 27 (if margins are negative, repeat testing in 4–6 months; if margins are positive, repeat testing in 4–6 months and manage based on results)  - basis: the document explicitly states "for patients aged 21–24 with histologically confirmed CIN III/HSIL → if transformation zone type is TZ1/2, observation (with cytology + colposcopy every 10–12 weeks) may be chosen... if transformation zone type is TZ3, diagnostic/therapeutic cervical conization should be performed directly" | A | A | A |
| Chunk size=256, Overlap=100 Using SentenceSplitter | in cervical cancer screening, for patients aged 21 to 24 with histologically confirmed (biopsy) CIN III/HSIL (cervical intraepithelial neoplasia grade III/high-grade squamous intraepithelial lesion), the follow-up steps are as follows:  based on document content: - the management plan for patients aged 21–24 is explicitly differentiated according to transformation zone (TZ) type:  - if transformation zone type is TZ1/2 (transformation zone fully or partially visible): observation may be chosen (repeat cytology + colposcopy every 10–12 weeks).  - if the lesion persists without progression, continue observation.  - if the lesion progresses or invasive cancer is detected, perform diagnostic/therapeutic cervical conization ([similarity: 0.603]).  - if transformation zone type is TZ3 (transformation zone not visible): proceed directly to diagnostic/therapeutic cervical conization ([similarity: 0.603]). - postoperative follow-up (if surgery is performed):  - if margins are negative: repeat cytology, colposcopy, and endocervical curettage (ECC) at 4–6 months.  - if margins are positive: repeat cytology, colposcopy, and ECC at 4–6 months, and manage according to findings ([similarity: 0.484]).  in summary, follow-up steps depend on TZ type: for TZ1/2, observation with repeat cytology and colposcopy every 10–12 weeks is an option; for TZ3, proceed directly to surgery, with postoperative follow-up per standard protocol. | A | A | A |
| **Question 29: In cervical cancer screening, if a patient aged 21 to 24 years has a histopathological confirmation (biopsy) of HSIL and a TZ3 classification for colposcopy, what follow-up steps should be conducted?** | | | | |
| Chunk size=512, Overlap=0 Using TokenTextSplitter | in cervical cancer screening, for patients aged 21 to 24 with histologically confirmed (biopsy) HSIL and colposcopic classification of TZ3, the following follow-up steps should be taken:  - Preferred management: perform diagnostic/therapeutic cervical conization directly (observation or ablative therapy is not an option). - Postoperative follow-up steps:  - If postoperative pathology shows negative margins, perform a follow-up at 4–6 months including cytology, colposcopy, and endocervical curettage (ECC).  - If postoperative pathology shows positive margins (CIN II or higher), perform follow-up cytology, colposcopy, and ECC at 4–6 months, and manage according to the corresponding lesion grade based on the follow-up results.  - If suspicious invasive cancer is found intraoperatively, send for immediate pathological confirmation; if confirmed, transition to cervical cancer treatment protocol. - Basis: the document states that “if the patient is aged 21–24 and has a cervical transformation zone type of TZ3, the patient should undergo diagnostic/therapeutic cervical conization directly,” which applies to HSIL cases. | A | A | A |
| Chunk size=256, Overlap=100 Using SentenceSplitter | for patients aged 21 to 24 with histologically confirmed HSIL (including CIN III/HSIL) and a TZ3 colposcopic classification (transformation zone not visible), the follow-up steps are:  - Direct referral for diagnostic/therapeutic cervical excision ([similarity: 0.603] and [similarity: 0.591]). - The document emphasizes that TZ3 type does not permit observation and mandates direct surgery ([similarity: 0.603]). - Postoperative follow-up steps:  - If postoperative pathology shows negative margins, perform a follow-up (cytology + colposcopy + ECC) at 4–6 months.  - If postoperative pathology shows positive margins (CIN II or higher), perform a follow-up at 4–6 months with cytology, colposcopy, and ECC, and manage according to the corresponding lesion level based on results ([similarity: 0.484]).  In summary, the follow-up steps are: proceed directly to diagnostic/therapeutic cervical excision, then arrange a 4–6 month follow-up (cytology + colposcopy + ECC) based on margin status, and adjust subsequent management according to the findings. | A | A | A |
| **Question 30: In cervical cancer screening, if a patient aged 21 to 24 years has a histopathological confirmation (biopsy) of CIN II/III/HSIL or CIN II/HSIL and a TZ1/2 classification for colposcopy, what follow-up steps should be conducted?** | | | | |
| Chunk size=512, Overlap=0 Using TokenTextSplitter | for patients aged 21 to 24 with histologically confirmed (biopsy) CIN II/III/HSIL or CIN II/HSIL and colposcopic classification of TZ1/2 (transformation zone fully or partially visible):  - Preferred management: observation with follow-up (non-surgical treatment may be chosen). - Follow-up steps: repeat cytology and colposcopy every 10–12 weeks.  - If no progression is observed, continue surveillance.  - If progression occurs or invasive cancer is detected, perform diagnostic/therapeutic cervical conization; post-procedure management follows as previously described (e.g., if margins are negative, re-evaluate at 4–6 months; if margins are positive, re-evaluate at 4–6 months and manage based on findings). - Basis: the document explicitly states that for 21–24-year-old patients with histologically confirmed CIN II/III/HSIL or CIN II/HSIL and TZ1/2 colposcopic classification → observation may be chosen (repeat cytology + colposcopy every 10–12 weeks)... if no progression persists, continue observation; if progression or invasive cancer is found, diagnostic/therapeutic cervical conization should be performed. | A | A | A |
| Chunk size=256, Overlap=100 Using SentenceSplitter | for patients aged 21 to 24 years with histologically confirmed (biopsy) CIN II/III/HSIL or CIN II/HSIL with colposcopic classification of TZ1/2 (transformation zone fully or partially visible), the following follow-up steps may be chosen:  - Observation with repeat cytology and colposcopy every 10–12 weeks ([similarity: 0.603]).  Management during observation: - If the lesion remains stable (no change or regression), continue observation. - If the lesion progresses or invasive cancer is detected, perform diagnostic/therapeutic cervical conization ([similarity: 0.603] and [similarity: 0.591]).  If surgery (e.g., due to lesion progression) is chosen, post-operative follow-up: - When margins are negative: repeat cytology, colposcopy, and endocervical curettage (ECC) at 4–6 months. - When margins are positive: repeat cytology, colposcopy, and ECC at 4–6 months, and manage according to findings ([similarity: 0.484]).  In summary, the follow-up steps are: observation with repeat cytology and colposcopy every 10–12 weeks may be selected; if the lesion is stable, continue observation; if progression or invasive cancer is found, perform diagnostic/therapeutic cervical conization, followed by standard post-operative surveillance.  Summary note: - All responses are strictly based on the provided document excerpts, with the highest similarity-score contexts cited for each piece of information. No external knowledge has been added. - Clear guidance exists in the document for each scenario; therefore, no "answer not found in knowledge base" responses occurred. - As a gynecologic specialist, I advise that these approaches should be individualized in real clinical practice, considering patient-specific factors (e.g., pregnancy status, compliance) and the latest guidelines. Please provide additional details or follow-up questions if needed. | B | A | A |
| **Question 31: In cervical cancer screening, if a pregnant patient has a histopathological confirmation (biopsy) of HSIL, what follow-up steps should be conducted?** | | | | |
| Chunk size=512, Overlap=0 Using TokenTextSplitter | in cervical cancer screening, if a pregnant patient has histologically confirmed (biopsy) HSIL, the following follow-up steps should be performed:  - During pregnancy: cytology (e.g., Pap smear) and colposcopy should be performed every 10–12 weeks to monitor lesion progression and rule out invasive cancer. - If no invasive cancer is found: follow-up should be deferred until 6–8 weeks postpartum for repeat evaluation, including cytology, colposcopy, and endocervical curettage (ECC). - If suspicious for invasive cancer is found during pregnancy: the patient should undergo diagnostic/therapeutic conization immediately and be transitioned to the cervical cancer treatment pathway.  this information is based on the management principles for pregnant patients repeatedly stated in the document (e.g., “for pregnant patients, cytology + colposcopy should be performed every 10–12 weeks. if no invasive cancer is found, defer follow-up until 6–8 weeks postpartum for repeat cytology + colposcopy + ECC.”) | A | A | A |
| Chunk size=256, Overlap=100 Using SentenceSplitter | in cervical cancer screening, if a pregnant patient has histologically confirmed HSIL (by biopsy), the following follow-up steps should be taken:  - The primary goal is to exclude invasive cancer. In the absence of evidence of invasive cancer during pregnancy, close monitoring is recommended. - Specific follow-up steps include:  → Cytology (e.g., Pap smear) and colposcopy every 10–12 weeks to assess lesion progression and rule out invasive cancer.  → If no invasive cancer is found on follow-up, monitoring should continue until after delivery. - Immediate diagnostic or therapeutic cervical excision (e.g., conization) is not recommended during pregnancy due to increased risk of complications (such as bleeding or miscarriage), unless there is suspicious evidence of invasive cancer. - Relevant document excerpt: "For pregnant women, the main goal in the management of both low-grade and high-grade cervical lesions is to exclude cervical cancer. If a pregnant woman has no evidence of invasive cancer, cytology or colposcopy can be repeated every 10–12 weeks, with re-evaluation 6–8 weeks postpartum." And: "For pregnant patients, cytology plus colposcopy should be performed every 10–12 weeks. If no invasive cancer is found, re-evaluation (cytology + colposcopy + ECC) should be deferred until 6–8 weeks postpartum."  Summary: For pregnant patients with HSIL, follow-up consists of cytology and colposcopy every 10–12 weeks to exclude invasive cancer; re-evaluation (cytology + colposcopy + ECC) is required at 6–8 weeks postpartum. If suspicious for invasive cancer is detected during follow-up, diagnostic/therapeutic cervical excision should be performed. | A | A | A |
| **Question 32: After diagnostic/therapeutic cervical conization for cervical cancer, what follow-up steps should be conducted?** | | | | |
| Chunk size=512, Overlap=0 Using TokenTextSplitter | after diagnostic or therapeutic cervical conization, the follow-up steps are as follows:  - If the postoperative pathological margins are negative (no CINⅡ or higher lesion): perform a follow-up at 4–6 months postoperatively, including cytology, colposcopy, and endocervical curettage (ECC). If the follow-up results are normal, transition to routine screening. - If the postoperative pathological margins are positive (margin histopathology shows CINⅡ or higher): perform a follow-up at 4–6 months postoperatively, including cytology, colposcopy, and ECC. The follow-up results should be managed according to the lesion grade (e.g., CIN or invasive cancer); for example, if persistent HSIL is found, repeat conization or hysterectomy may be required. - If suspicious invasive cancer is identified intraoperatively: send for immediate pathological confirmation; if confirmed, transition to cervical cancer treatment protocol.  this information is based on detailed descriptions of post-conization management in the source document (e.g., “if the pathological margins are negative after diagnostic/therapeutic cervical resection: follow-up at 4–6 months (cytology + colposcopy + ECC)”; “if margins are positive: follow-up cytology, colposcopy, and ECC at 4–6 months.”). | A | A | A |
| Chunk size=256, Overlap=100 Using SentenceSplitter | after diagnostic/therapeutic cervical conization (e.g., LEEP or cold knife conization), follow-up steps are determined by the postoperative pathological margin status:  - **Negative margins (no residual lesion):**  - At 4–6 months postoperatively: perform cytology + HPV testing, colposcopy, and endocervical curettage (ECC).  - If follow-up results are normal, subsequent cytology and HPV testing are recommended every 6–12 months; after two consecutive negative results, screening may transition to every 3 years.  - Long-term follow-up should continue for 20 years to monitor for recurrence.  - **Positive margins (residual CINⅡ or higher):**  - At 4–6 months postoperatively: perform cytology, colposcopy, and ECC.  - Based on follow-up findings (e.g., lesion grade), manage according to standard protocols (e.g., repeat conization or hysterectomy).  - **If invasive cancer is suspected intraoperatively:** send for immediate pathological confirmation and transition to cervical cancer treatment protocol.  (Reference: "If the pathological margins are negative after diagnostic/therapeutic cervical conization: follow-up at 4–6 months with cytology + colposcopy + ECC" and "For patients with HSIL/CINⅡ+ on postoperative margin: recommend cytology + HPV testing follow-up for 20 years. If postoperative pathology confirms HSIL at margins, follow-up with colposcopy at 4–6 months is advised.") | A | A | A |
| **Question 33: In cervical cancer screening, if a pregnant patient has a histopathological confirmation (biopsy) of HSIL with no invasive cancer during pregnancy, what follow-up steps should be conducted after childbearing?** | | | | |
| Chunk size=512, Overlap=0 Using TokenTextSplitter | in cervical cancer screening, if a pregnant patient has histologically confirmed (biopsy) HSIL and no invasive cancer during pregnancy, the following postpartum follow-up steps should be performed:  - At 6–8 weeks postpartum: conduct a follow-up examination including cytology, colposcopy, and endocervical curettage (ECC). - Management based on follow-up results:  - If the follow-up shows no CIN II or higher lesion (i.e., no abnormality), the patient should subsequently transition to routine cervical cancer screening (e.g., cytology or HPV testing every 3–5 years).  - If the follow-up reveals CIN II or higher lesion (e.g., persistent HSIL), management should be according to the corresponding lesion grade (e.g., perform diagnostic/therapeutic cervical excision). - Special note: Lesions in pregnant patients with HSIL may regress spontaneously postpartum; therefore, postpartum follow-up is critical. If no progression was observed during pregnancy monitoring, postpartum follow-up is the standard procedure.  this information is based on the description of postpartum management in the document (e.g., “perform follow-up at 6–8 weeks postpartum. If abnormalities are found on follow-up, manage according to the abnormal processing protocol. If no CIN is found on follow-up, the patient should transition to routine screening.”). | A | A | A |
| Chunk size=256, Overlap=100 Using SentenceSplitter | after delivery, follow-up for a pregnant patient with histologically confirmed HSIL (biopsy) and no invasive cancer during pregnancy should be performed at 6–8 weeks postpartum.  the follow-up steps include: - cytology (e.g., Pap smear) - colposcopy - endocervical curettage (ECC)  management based on follow-up results: - if follow-up shows no abnormality (no CIN II or higher), the patient should transition to routine cervical cancer screening (e.g., cytology or HPV testing every 3 years). - if follow-up reveals abnormality (e.g., CIN II+), diagnostic/therapeutic cervical conization should be performed, and management should proceed according to the lesion grade.  document emphasizes: postpartum follow-up is necessary because lesions may regress or progress after pregnancy.  relevant document excerpts: "follow-up at 6–8 weeks postpartum. if abnormalities are found on follow-up, manage according to the abnormal handling protocol. if no CIN is found on follow-up, the patient should transition to routine screening." and "postpartum follow-up at 6–8 weeks (cytology + colposcopy + ECC). – if no CIN II+ on postpartum follow-up, the patient should undergo routine screening thereafter. – if CIN II+ is found on postpartum follow-up → perform diagnostic/therapeutic cervical conization."  summary: at 6–8 weeks postpartum, perform cytology + colposcopy + ECC. if no CIN II+ is found, transition to routine screening; if CIN II+ is found, perform diagnostic/therapeutic cervical conization and manage according to the lesion grade. | A | A | A |
| **Question 34: What are the strategies for HPV vaccine use? What are the recommended vaccination programs for different age groups?** | | | | |
| Chunk size=512, Overlap=0 Using TokenTextSplitter | what is the strategy for HPV vaccine use? what are the recommended vaccination schedules for different age groups?  - HPV vaccine use strategy:  - As primary prevention for cervical cancer, focus on females before the onset of sexual activity, especially girls aged 10–14.  - Vaccine types include bivalent (targeting HPV16 and 18), quadrivalent (targeting HPV16, 18, 6, and 11), and nonavalent (targeting HPV6, 11, 16, 18, 31, 33, 45, 52, and 58). These vaccines consist of virus-like particles (VLPs) and are non-infectious.  - WHO data indicate that HPV vaccines have a good safety profile. - Recommended vaccination schedules for different age groups:  - Children aged 9–14 (including girls and boys): a 2-dose schedule is recommended, administered at month 0 and month 5–13 (e.g., with an interval of 5–13 months). If the second dose is given within 5 months after the first dose, a third dose is recommended.  - Individuals aged 15 and above and immunocompromised persons (regardless of age): a 3-dose schedule is recommended, administered at months 0, 1, and 6 (e.g., 0.5 mL per dose). - General principle: vaccination should be completed before the onset of sexual activity to maximize preventive effect.  this information is based on specific descriptions of HPV vaccine in the document (e.g., "for girls and boys aged 9~14, a 2-dose schedule (0.5mL, 0 and 5～13 months) is suggested... for those aged 15 and above and immunocompromised individuals, regardless of age, a 3-dose schedule (0.5mL, 0, 1, 6 months) is suggested"). | A | A | A |
| Chunk size=256, Overlap=100 Using SentenceSplitter | what is the HPV vaccination strategy? what are the recommended vaccination schedules for different age groups?  based on the document content: - the HPV vaccine strategy is the core of primary prevention for cervical cancer, focusing on adolescents who have not yet initiated sexual activity to prevent HPV infection and related precancerous lesions. - vaccine types: there are three prophylactic HPV vaccines:  - bivalent vaccine: targets HPV types 16 and 18 (the main causes of cervical cancer).  - quadrivalent vaccine: targets HPV types 6, 11, 16, and 18 (additionally prevents anogenital warts).  - nonavalent vaccine: targets HPV types 6, 11, 16, 18, 31, 33, 45, 52, and 58 (covers more high-risk types). - recommended schedules by age group:  - adolescents aged 9–14 years (girls and boys): a 2-dose schedule is recommended, with 0.5 mL per dose and intervals of 0 and 5–13 months. if the second dose is administered within 5 months after the first dose, a third dose is recommended.  - individuals aged 15 years and older and immunocompromised persons (regardless of age): a 3-dose schedule is recommended, with 0.5 mL per dose and intervals of 0, 1, and 6 months. - the document states that the vaccines consist of virus-like particles (VLPs) and are non-infectious, and WHO data confirm good safety profiles. - related document excerpt: "for $9 \sim 1 4$ year-old girls and boys, a 2-dose schedule (0.5$\mathrm{mL}$, 0 and 5～13 months) is recommended. if the second dose is given within 5 months after the first dose, a third dose is advised. for those aged 15 years and older and immunocompromised individuals, regardless of age, a 3-dose schedule $(0.5\mathrm{mL}, 0, 1, 6$ months) is recommended. WHO currently reports no safety concerns regarding HPV vaccines."  summary: the HPV vaccination strategy is prophylactic, using a 2-dose schedule (0 and 5–13 months) for adolescents aged 9–14 years, and a 3-dose schedule (0, 1, 6 months) for those aged 15 years and older and immunocompromised individuals. vaccine types include bivalent, quadrivalent, and nonavalent, with emphasis on coverage of high-risk HPV types. | A | A | A |
| **Question 35: Is HPV primary screening applicable in low-income countries? If so, why?** | | | | |
| Chunk size=512, Overlap=0 Using TokenTextSplitter | yes, HPV primary screening is applicable in low-income countries. The reasons are as follows:  - Higher sensitivity and negative predictive value: HPV testing is more sensitive than conventional cytology (e.g., Pap smear) and can more accurately identify high-risk individuals, reducing missed diagnoses. A negative result provides high confidence, allowing for extended screening intervals (e.g., screening only once in a lifetime), which is particularly important in resource-limited settings.  - Feasibility and simplicity: HPV testing involves simple procedures, does not require highly specialized laboratories or personnel, and is easy to implement in primary healthcare. The document notes that auxiliary methods such as visual inspection with acetic acid (VIA) are already widely used in low-income countries (e.g., sub-Saharan Africa) and can be combined with HPV primary screening to improve efficiency.  - Cost-effectiveness and acceptability: HPV primary screening reduces screening frequency and the need for follow-up examinations, lowering overall costs. The document emphasizes that screening strategies should be "feasible, simple, accurate, acceptable, and easily accessible to women at highest risk"; HPV primary screening meets these principles and is especially suitable for socioeconomically underdeveloped regions.  - Additional note: In low-income countries, HPV primary screening can replace cytology as the preferred method. Combined with vaccination, it contributes to the elimination of cervical cancer.   This information is based on the document's discussion of cervical cancer screening strategies (e.g., "HPV testing and visual inspection with acetic acid for screening in impoverished areas have higher efficiency."; "In low-income countries, screening can be done only once in a lifetime."; "Different countries should choose cervical cancer screening methods suited to local conditions."). | A | A | A |
| Chunk size=256, Overlap=100 Using SentenceSplitter | yes, HPV primary screening is applicable in low-income countries.  - reasons:   - HPV testing as a primary screening method has higher sensitivity and negative predictive value, enabling more accurate identification of high-risk individuals and reducing missed diagnoses.   - it allows for extended screening intervals (e.g., every 5 years or longer), and in resource-limited settings, even "screen once in a lifetime," thereby lowering screening frequency and costs.   - in low-income countries (e.g., sub-Saharan Africa), HPV primary screening is more feasible, simpler, and more acceptable than traditional methods (e.g., cytology), as it does not require advanced laboratory facilities and is easy to implement at the primary care level.   - the document emphasizes that different countries should adopt screening strategies that are "locally appropriate." HPV primary screening aligns with the principles of being feasible, simple, accurate, acceptable, and accessible to the highest-risk women.   related document excerpts:  "Many healthcare systems are beginning to switch to HPV primary screening. This screening has higher sensitivity and negative predictive value, allows for extended screening intervals, and in low-income countries, a woman may be screened only once in her lifetime."  "Different countries should choose locally appropriate cervical cancer screening methods. The principles for selecting a screening strategy are: feasible, simple, accurate, acceptable, and easily usable by the highest-risk women."   summary: HPV primary screening is suitable for low-income countries because of its high sensitivity and negative predictive value, the ability to extend screening intervals (e.g., once in a lifetime), reduced resource requirements, and compliance with principles of simplicity, feasibility, and acceptability, particularly in resource-scarce regions. | A | B | A |
| **Question 36: which cervical cancer screening methods are widely used in low-income countries, particularly in sub-Saharan Africa?** | | | | |
| Chunk size=512, Overlap=0 Using TokenTextSplitter | in low-income countries, particularly in sub-Saharan Africa, the cervical cancer screening method widely used is visual inspection with acetic acid (VIA). The document states: "VIA involves applying freshly prepared 3%～5% acetic acid to the cervix for 1 min and then observing for acetowhite lesions. It has been widely implemented in low-income countries in sub-Saharan Africa." This highlights VIA as a simple, cost-effective, and easily implementable screening method adopted broadly in resource-limited settings. | A | C | A |
| Chunk size=256, Overlap=100 Using SentenceSplitter | in low-income countries, particularly in sub-Saharan Africa, the cervical cancer screening method widely used is VIA (visual inspection with acetic acid). Specifically, VIA involves applying freshly prepared 3% to 5% acetic acid to the cervix for 1 minute and then visually inspecting for acetowhite lesions. This method has been widely implemented in low-income countries in sub-Saharan Africa (as referenced in a segment with similarity score 0.404). The document also emphasizes that different countries should select screening methods suited to local conditions, with principles of feasibility, simplicity, accuracy, acceptability, and ease of use for women at highest risk. Therefore, VIA is the primary screening tool in sub-Saharan Africa. | B | B | B |
| **Question 37: what are the key indicators included in the expert consensus for quality control management of HPV testing?** | | | | |
| Chunk size=512, Overlap=0 Using TokenTextSplitter | the key indicators included in the expert consensus on quality control management for HPV testing are as follows (based on the quality control scheme described in the document):  - Positive detection rate for each TBS diagnostic category: requires assessment based on a statistical sample size exceeding 5,000 cases. - ASC/SIL ratio: the ideal range is 1.5 to 3.0, indicating good quality control. - High-risk HPV positivity rates for different cytological grades, specifically:  - ASC-US: 20% to 40%  - ASC-H: 40% to 60%  - LSIL: 50% to 70%  - HSIL: 70% to 90%  - A positivity rate exceeding 90% is considered good. - Concordance rate between cytologically positive specimens and histologically confirmed diagnoses: requires assessment based on more than 100 cytologically positive specimens (including ASC-US, ASC-H, LSIL, HSIL, SCC, AGC, AIS) and their final histopathological diagnoses (e.g., from cervical excision or hysterectomy).  These indicators are designed to ensure the accuracy and consistency of HPV testing. The source document is the CSCCP expert consensus on cytopathology quality control. | B | A | B |
| Chunk size=256, Overlap=100 Using SentenceSplitter | the key indicators included in the expert consensus on quality control management for HPV testing are as follows:  - Positive detection rate for each TBS diagnostic category: to be assessed based on statistical volume from >5000 cases.  - Atypical squamous cells/squamous intraepithelial lesion (ASC/SIL) ratio: ideal range 1.5–3.0; this ratio evaluates diagnostic accuracy (a ratio within this range indicates good quality control).  - Concordance rate between positive cytology specimens and final histological diagnosis: refers to the degree of agreement between cytological positive findings (e.g., ASC-US, ASC-H, LSIL) and histopathological diagnosis.  - Follow-up registration system and follow-up rate for positive cases: requires establishment of a follow-up system and tracking of follow-up rates.  - On-site inspection: includes randomly selecting 10–20 consecutive positive cases, 20–30 negative cases, and 20 inter-laboratory quality control standard slides for on-site evaluation.  These indicators aim to strengthen quality control for HPV testing and ensure the reliability of screening results. | A | A | A |
| **Question 38: what is the difference in clinical management between ASC-US and ASC-H?** | | | | |
| Chunk size=512, Overlap=0 Using TokenTextSplitter | ASC-US and ASC-H differ significantly in clinical management based on the provided guidelines:  - **ASC-US management**:   Typically undergoes HPV triage testing.   → If HPV positive (regardless of genotyping) or HPV genotyping shows HPV16/18 positive, refer for colposcopy.   → If HPV negative, recommend repeat cytology in 1 year.   → If HPV testing is unavailable, refer directly for colposcopy.   The document states: “ASC-US uses HPV for triage; if HPV positive (ungenotyped) or HPV genotyping detects HPV16/18 positive, colposcopy referral is indicated.”  - **ASC-H management**:   Refer directly for colposcopy without prior HPV testing.   Because ASC-H exhibits cellular features suggestive of HSIL, with a high probability of CIN II/III diagnosis (24%–94%).   The document emphasizes: “ASC-H cellular changes have HSIL features; the probability of being diagnosed CIN II/III is 24%∼94%,” thus requiring immediate colposcopy.  In summary, ASC-US relies on HPV testing for triage, whereas ASC-H bypasses HPV testing and proceeds directly to colposcopy due to its higher risk of significant lesion. | A | A | A |
| Chunk size=256, Overlap=100 Using SentenceSplitter | what is the difference in clinical management between ASC-US and ASC-H?  The document details the differences in clinical management between ASC-US (Atypical Squamous Cells of Undetermined Significance) and ASC-H (Atypical Squamous Cells, cannot exclude HSIL) (segments with similarity scores 0.427, 0.338, 0.278, etc.): - ASC-US:  - Poor diagnostic reproducibility, prone to underdiagnosis or overdiagnosis, with a prevalence of about 5% in the general population and accounting for over 50% of abnormal Pap smears (similarity 0.427 segment).  - Management strategy: HPV testing is typically used for triage. If HPV positive (either untyped or HPV16/18 genotyping positive), refer for colposcopy; if HPV negative, recommend cytology follow-up in 1 year (similarity 0.338 segment). When HPV testing is unavailable, refer directly to colposcopy.  - Risk: The prevalence of high-risk HPV infection in women with ASC-US is 31%–60%, with the final diagnosis of CIN II/III in <10%, and invasive cancer risk of only 0.1%–0.2%. - ASC-H:  - Cellular changes suggestive of HSIL (High-grade Squamous Intraepithelial Lesion), with a higher probability of being diagnosed as CIN II/III (24%–94%) (similarity 0.338 segment).  - Management strategy: Refer directly to colposcopy without HPV triage (similarity 0.278 segment flowchart). This is because ASC-H carries a higher risk of malignancy and requires priority exclusion of high-grade lesions. In summary, ASC-US management relies on HPV triage to determine colposcopy referral, whereas ASC-H is directly referred to colposcopy due to higher risk. | A | A | A |
| **Question 39: is four-quadrant sampling still necessary for patients with no abnormalities on colposcopy?** | | | | |
| Chunk size=512, Overlap=0 Using TokenTextSplitter | no.  For patients with no abnormalities found on colposcopy, routine quadrant sampling is not recommended. The document explicitly states: “Given the varying levels of colposcopy physicians in our country and the lack of small biopsy forceps (2~3 mm), quadrant sampling performed without colposcopic abnormalities should be approached with caution. Targeted multi-site biopsy guided by colposcopy is recommended.” This emphasizes avoiding blind quadrant sampling and instead performing targeted biopsies under colposcopic guidance to reduce unnecessary trauma and overtreatment. | A | A | A |
| Chunk size=256, Overlap=100 Using SentenceSplitter | no.  The document explicitly states that for patients with no abnormalities on colposcopy, routine four-quadrant sampling is not recommended (similarity 0.384 segment). Reasons include: - Given the varying levels of colposcopy expertise in China and the lack of micro-biopsy forceps (2–3 mm), four-quadrant sampling may cause unnecessary trauma and lead to overtreatment. - Targeted multi-site biopsy (i.e., sampling of suspicious areas under colposcopic guidance) is recommended instead of blind four-quadrant sampling. - Expert consensus emphasizes strengthening colposcopy training and quality control to avoid missed or over-diagnosis. Therefore, four-quadrant sampling should only be considered when colposcopy reveals abnormalities; in the absence of abnormalities, targeted multi-site biopsy is recommended. | A | A | A |
| **Question 40: what are the differences in cervical cancer screening and management strategies for women during pregnancy?** | | | | |
| Chunk size=512, Overlap=0 Using TokenTextSplitter | the screening and management strategies for cervical cancer in pregnant women differ as follows:  - **Screening strategy**: Pregnant women should undergo cytology and colposcopy every 10–12 weeks. The document states: “For pregnant patients, cytology + colposcopy should be performed every 10–12 weeks.”  - **Management strategy**:  - If no invasive cancer is found, defer re-evaluation until 6–8 weeks postpartum (including cytology, colposcopy, and endocervical curettage [ECC]). After postpartum recheck, if no CIN II+ lesion is present, transition to routine screening; if CIN II+ is detected, perform diagnostic/therapeutic cervical conization.  - If cytology or colposcopy during pregnancy suggests possible invasive cancer, perform diagnostic/therapeutic cervical conization immediately.  - The document also emphasizes: “Pregnant women without evidence of invasive cancer may be monitored with cytology or colposcopy every 10–12 weeks, and re-evaluated 6–8 weeks postpartum.” This highlights the principle of delaying invasive procedures until after delivery unless invasive cancer is highly suspected.  This strategy aims to balance maternal health and fetal safety, prioritizing observation and non-invasive approaches. | A | A | A |
| Chunk size=256, Overlap=100 Using SentenceSplitter | the cervical cancer screening and management strategies for pregnant women differ as follows:  - Screening and management principles: The primary goal is to exclude invasive cancer. In pregnant women without evidence of invasive cancer, aggressive interventions (such as biopsy or surgery) are not recommended to avoid risks to the fetus (similarity 0.291 segment). - Specific strategies:  → Close monitoring: Recheck every 10–12 weeks, including cytology or colposcopic examination, to exclude invasive cancer (similarity 0.307 segment).  → Postpartum follow-up: Reassess at 6–8 weeks postpartum (similarity 0.291 segment).  → Abnormality management: If follow-up shows abnormalities (e.g., cytology result ≥ ASC-US or HPV positive), manage according to standard abnormal result protocols (e.g., refer for colposcopy or biopsy). - Notes: Management of cervical lesions (regardless of low-grade or high-grade) during pregnancy is primarily conservative observation unless there is clear evidence of invasive cancer. The document does not mention adjustments to routine screening during pregnancy (e.g., whether to avoid certain tests) but emphasizes individualized management based on patient preference and clinical presentation. | B | A | B |
| **Question 41: What is the preferred clinical diagnosis of cervical cancer?** | | | | |
| Chunk size=512, Overlap=0 Using TokenTextSplitter | the preferred clinical diagnostic methods for cervical cancer are:  - Physical examination: including general assessment to evaluate overall health status. - Gynecological examination: including bimanual and trimanual examinations, recommended to be performed by two or more senior physicians; examination under anesthesia if necessary; when staging is disputed, the earlier stage is recommended.  These methods constitute the foundational clinical diagnostic steps for initial assessment of the extent and stage of cervical lesions. Pathological diagnosis (e.g., biopsy) is a key subsequent confirmation method, but clinical diagnosis is the preferred initial approach. | A | A | A |
| Chunk size=256, Overlap=100 Using SentenceSplitter | the preferred clinical diagnostic methods for cervical cancer are physical examination and gynecological examination. these methods are classified as level I recommendation (highest recommendation level). specifically:  - physical examination: comprehensive assessment of overall health status.  - gynecological examination: includes bimanual and trimanual examinations, recommended to be performed by two or more senior physicians; examination under anesthesia may be necessary when indicated. if staging assessments differ, the earlier stage should be adopted.  these examinations are used for initial evaluation of tumor location, size, and extent of spread, forming the foundation of clinical diagnosis. the document does not mention other clinical diagnostic methods as preferred. | A | A | A |
| **Question 42: What tests should be conducted to make a pathologic diagnosis of cervical cancer?** | | | | |
| Chunk size=512, Overlap=0 Using TokenTextSplitter | to make a pathological diagnosis of cervical cancer, the following examinations should be performed:  - Level I recommendation (highest recommendation level):   - Cervical biopsy: as the core method for direct acquisition of tissue samples for pathological analysis.   - Cervical cytology: used for screening and preliminary diagnosis; however, note that false negatives may occur in cervical adenocarcinoma (note b).  - Level II recommendation:   - Cervical conization: recommended when cervical biopsy cannot determine the presence or absence of invasion or microinvasive carcinoma, to clarify the depth of invasion (note c).  - Level III recommendation:   - Fine needle aspiration cytology: recommended when inguinal or cervical lymph node metastasis is suspected, to establish a definitive diagnosis (note d).   These examinations are standard tools for pathological diagnosis and must be combined with histological analysis (including gross and microscopic examination) to confirm the type and grade of cervical cancer. | A | A | A |
| Chunk size=256, Overlap=100 Using SentenceSplitter | To make a pathological diagnosis of cervical cancer, the following examinations should be performed, classified by recommendation level:  - Level I recommendation (highest):   - Cervical biopsy: As the primary method, samples are taken directly from suspicious cervical areas for histological examination to confirm malignancy.  - Level II recommendation:   - Cervical conization: Used when biopsy cannot clearly determine the depth of invasion (e.g., microinvasive carcinoma) or when cytology and biopsy results are inconsistent (e.g., repeated high-grade squamous intraepithelial lesion without biopsy confirmation).  - Level III recommendation:   - Fine needle aspiration cytology: For evaluation of suspicious metastatic lymph nodes (e.g., inguinal or cervical lymph nodes).  Pathological diagnosis requires microscopic examination of tissue samples to confirm histological subtype, grade, and depth of invasion. The document emphasizes that biopsy is the core method at Level I, and conization is used for supplementary diagnosis. | B | A | B |
| **Question 43: What tumor markers can be tested for laboratory diagnosis of cervical cancer? What is the significance of each tumor marker detected?** | | | | |
| Chunk size=512, Overlap=0 Using TokenTextSplitter | - SCC (Squamous Cell Carcinoma Antigen): Recommended for the detection of cervical squamous cell carcinoma, aiding in diagnosis and monitoring the progression of squamous cell carcinoma (annotation e). - CA125: Recommended for the detection of cervical adenocarcinoma, serving as an auxiliary diagnostic marker for adenocarcinoma (annotation e). - CEA (Carcinoembryonic Antigen) and CA19-9: Recommended for the detection of cervical gastric-type adenocarcinoma, used for auxiliary diagnosis and assessment of this subtype (annotation e). - NSE (Neuron-Specific Enolase): Recommended for the detection of cervical small cell neuroendocrine carcinoma, aiding in the diagnosis of this rare subtype (annotation e).  These tumor markers are primarily used to assist in the diagnosis of specific cervical cancer subtypes and are not standalone diagnostic tools; they must be interpreted in conjunction with pathological and imaging findings. | A | A | A |
| Chunk size=256, Overlap=100 Using SentenceSplitter | cervical cancer laboratory diagnosis can detect the following tumor markers:  - SCC (Squamous Cell Carcinoma Antigen)  - CEA (Carcinoembryonic Antigen)  - CA125  - CA19-9  - NSE (Neuron-Specific Enolase)   These are classified as Level I recommendations.   The significance of each tumor marker is as follows:  - **SCC (Squamous Cell Carcinoma Antigen)**: Primarily used for the detection and monitoring of cervical squamous cell carcinoma, serving as an auxiliary diagnostic indicator.  - **CA125**: Mainly used for the detection of cervical adenocarcinoma, aiding in the assessment of the adenocarcinomatous subtype.  - **CEA (Carcinoembryonic Antigen) and CA19-9**: Primarily used for the detection of cervical gastric-type adenocarcinoma, assisting in the diagnosis of this specific subtype.  - **NSE (Neuron-Specific Enolase)**: Mainly used for the detection of cervical small cell neuroendocrine carcinoma, serving as a marker of neuroendocrine differentiation.   The detection of these markers is intended to assist in pathological diagnosis, subtyping, and monitoring; however, it is emphasized that these biomarkers have only auxiliary diagnostic value and cannot be used alone for definitive diagnosis. HPV testing is also a Level I recommendation, used to evaluate HPV infection status. | A | A | A |
| **Question 44: In the diagnosis of cervical cancer, which imaging method should be preferred in order to evaluate cervical tumors? Which imaging method should be used in order to evaluate metastatic lesions?** | | | | |
| Chunk size=512, Overlap=0 Using TokenTextSplitter | in the diagnosis of cervical cancer, to assess the cervical tumor, the preferred imaging method is pelvic MRI. It is recommended as the first-choice imaging method for evaluating local tumors of the cervix because it provides high-resolution soft tissue contrast, which is helpful for assessing tumor size, depth of infiltration, and parametrial involvement (annotation f).  If MRI is contraindicated (e.g., presence of metallic implants), pelvic CT may be used as an alternative (annotation f).   To assess metastatic lesions, the preferred imaging method is CT of the neck, chest, abdomen, and pelvis. It is used for comprehensive evaluation of metastatic lesions, including lymph nodes, lungs, liver, and other distant organs (annotation g).  When necessary, PET/CT should be supplemented. It is suggested for patients with stage IB1 or higher who have access to it, to improve the accuracy of metastatic lesion detection, especially in evaluating lymph node metastases (annotation g).   The selection of these methods is based on tumor staging and clinical needs, and imaging results are used to supplement clinical and pathological diagnosis. | A | A | A |
| Chunk size=256, Overlap=100 Using SentenceSplitter | response:  According to the document content (similarity 0.624 and 0.580), imaging methods are classified by assessment target:  - For evaluating cervical tumor (local tumor):   - Preferred method: Pelvic MRI (Level I recommendation). The document explicitly states: “Pelvic MRI is recommended as the preferred method for evaluating local cervical tumors” (similarity 0.580). If MRI is contraindicated (e.g., patient has metal implants), pelvic CT may be selected as an alternative (Level II recommendation).  - For evaluating metastatic lesions:   - Preferred method: Neck-thorax-abdomen-pelvis CT (Level I recommendation). When necessary (e.g., IB1 stage or higher), PET/CT examination is recommended (Level I recommendation). The document indicates: “Metastatic lesion assessment: Neck-thorax-abdomen-pelvis CT, PET/CT when necessary” (similarity 0.624). For specific situations (e.g., suspected bone metastasis), bone scan is recommended; for suspected bladder or rectal involvement, cystoscopy or colonoscopy is recommended (Level III recommendation).  These methods are used to comprehensively assess tumor extent and metastatic risk, with imaging results assisting in staging and treatment decisions. | B | A | A |
| **Question 45: what are the recommended diagnostic tools for patients with FIGO stage IA1 cervical cancer? Is it necessary to consider lymphovascular infiltration?** | | | | |
| Chunk size=512, Overlap=0 Using TokenTextSplitter | yes  - Recommended diagnostic tools:   - Pathological diagnostic tools: FIGO stage IA1 is defined as microscopically confirmed invasive cancer with stromal invasion depth less than 3 mm. Diagnosis must be based on histopathological examination. Recommended tools include:   - Cervical conization: Used to obtain complete tissue samples to accurately determine invasion depth (commonly used in IA1 stage diagnosis).   - Cervical biopsy: Serves as an initial tool but must be confirmed with conization or surgical specimens (since IA stage requires microscopic diagnosis and cannot rely on biopsy alone).   - Imaging tools (e.g., pelvic MRI) are generally not used for IA1 stage diagnosis unless high-risk features are present; the document does not specify imaging recommendations for IA1. Therefore, pathological tools are primarily relied upon.  - Consideration of lymphovascular space invasion (LVSI):   - Yes. Although LVSI does not alter the FIGO staging (the document states "lymphovascular invasion does not change the stage"), it influences treatment decisions. For example, in IA1 stage, if LVSI is positive, modified radical hysterectomy with pelvic lymphadenectomy is recommended; if LVSI is negative, cervical conization or extrafascial hysterectomy may be performed (based on the "4.1.1.1 IA1 stage" section). Thus, LVSI status is a key factor in treatment planning. | A | A | A |
| Chunk size=256, Overlap=100 Using SentenceSplitter | In the FIGO staging system, imaging tools are used to assess tumor size and lymph node status as follows:  - Tumor size assessment: MRI (magnetic resonance imaging) is recommended as the best imaging method for evaluating primary tumors, especially those with a diameter >10 mm, because it provides more accurate information on tumor size and depth of infiltration. - Lymph node status assessment: PET-CT (positron emission tomography-computed tomography) is recommended for detecting lymph node metastases, particularly in nodes with a diameter >10 mm, as it is more accurate than CT or MRI (with a false-negative rate of approximately 4% to 15%). Other tools such as ultrasound, CT, and MRI can also be used for lymph node evaluation, but in areas with high incidence of tuberculosis or inflammation (e.g., HIV-endemic regions), lymphadenopathy may not indicate malignancy and should be confirmed with pathological biopsy.  Recommended imaging tools include: ultrasound, CT (computed tomography), MRI, PET/CT. The document emphasizes that any available imaging method can be used for staging, but MRI is superior to CT in assessing parametrial involvement. Imaging results must be recorded with the specific method used (e.g., type of technique) to supplement clinical examination and to avoid unnecessary dual treatment (such as surgery and radiotherapy).  Note: The accuracy of imaging assessment for the parametrium and upper vagina is suboptimal and may result in false-negative or false-positive findings due to infection or bulky tumors; therefore, clinical examination (e.g., bimanual gynecological examination) remains the more important assessment method. | B | B | B |
| **Question 46: How are imaging tools used to assess tumor size and lymph node status in FIGO staging? What specific imaging tools are recommended?** | | | | |
| Chunk size=512, Overlap=0 Using TokenTextSplitter | In the FIGO staging system, imaging tools are used to assess tumor size and lymph node status to assist in determining the extent of disease involvement, guide treatment decisions (e.g., to avoid dual therapy with surgery and radiotherapy), and denote staging (e.g., "r" is used to indicate radiologic findings when lymph node metastasis is identified). The specific methods and recommended imaging tools are as follows:  - Assessment of tumor size:  - MRI is the preferred imaging method for evaluating primary tumor size, especially for tumors with a diameter >10 mm, as it accurately measures the maximum tumor diameter (the document states: "For primary tumors >10mm, MRI is the optimal imaging assessment method").  - Ultrasound may also be used for assessment, but requires operation by an experienced expert to ensure accuracy (the document states: "If performed by an experienced expert, ultrasound diagnosis also has good accuracy").  - The purpose of imaging assessment is to supplement clinical examination, assist in determining tumor size (e.g., for subclassifying stage IB), and record the specific method used for subsequent analysis (the document states: "The specific imaging modality used should be recorded for subsequent evaluation").  - Assessment of lymph node status:  - PET-CT is the most accurate tool for detecting lymph node metastasis, especially for nodes >10 mm, with a false-negative rate of approximately 4% to 15%, superior to CT and MRI (the document states: "For detecting lymph nodes >10mm, PET-CT is more accurate than CT and MRI, with a false-negative rate of about 4%～15%").  - In areas with high prevalence of tuberculosis and inflammation (e.g., HIV-endemic regions), enlarged lymph nodes do not necessarily indicate metastasis; therefore, confirmation or exclusion of metastasis should be based on imaging, fine-needle aspiration, or biopsy (the document states: "Clinicians can determine or exclude metastasis based on imaging, fine-needle aspiration, or biopsy").  - When lymph node metastasis is identified by imaging, it is used for staging notation (e.g., stage IIIC1r) and the technique type must be recorded (the document states: "If pelvic lymph node metastasis is found by imaging, the stage is IIIC1r" and "The type of imaging and pathological techniques must be recorded").  - Recommended imaging tools:  - MRI: Preferred for assessing tumor size and parametrial involvement, superior to CT, especially for tumors >10 mm (the document repeatedly emphasizes: "MRI assessment of parametrial involvement is superior to CT").  - PET-CT: Recommended for lymph node assessment due to its high accuracy.  - CT: Can be used for general assessment but is less accurate than MRI and PET-CT.  - Ultrasound: May be used when operated by experienced personnel, suitable for resource-limited settings.  - Other tools such as intravenous pyelography or urinary tract ultrasound can be used to assess hydronephrosis (the document states: "Hydronephrosis should be evaluated using urinary tract ultrasound, intravenous pyelography, CT, or MRI").  In summary, imaging tools supplement clinical examination, but pathology remains the gold standard. All imaging modalities (including ultrasound, CT, MRI, PET-CT, etc.) may be used for staging, and the specific method must be recorded to ensure data analyzability (the document emphasizes: "All imaging modalities may be used for staging"). | A | A | A |
| Chunk size=256, Overlap=100 Using SentenceSplitter | In the FIGO staging system, imaging tools are used to assess tumor size and lymph node status as follows:  - Tumor size assessment: MRI (magnetic resonance imaging) is recommended as the best imaging method for evaluating primary tumors, especially those with a diameter >10 mm, because it provides more accurate information on tumor size and depth of infiltration. - Lymph node status assessment: PET-CT (positron emission tomography-computed tomography) is recommended for detecting lymph node metastases, particularly in nodes with a diameter >10 mm, as it is more accurate than CT or MRI (with a false-negative rate of approximately 4% to 15%). Other tools such as ultrasound, CT, and MRI can also be used for lymph node evaluation; however, in areas with high prevalence of tuberculosis or inflammation (e.g., HIV-endemic regions), lymphadenopathy may not indicate malignancy and should be confirmed with pathological biopsy.  Recommended imaging tools include: ultrasound, CT (computed tomography), MRI, and PET/CT. The document emphasizes that any available imaging method can be used for staging, but MRI is superior to CT in assessing parametrial involvement. Imaging results must be recorded with the specific method used (e.g., type of technique) to supplement clinical examination and to avoid unnecessary dual treatment (such as surgery and radiotherapy).  Note: The accuracy of imaging assessment for parametrial and upper vaginal involvement is suboptimal, as false-negative or false-positive results may occur due to infection or bulky tumors; therefore, clinical examination (such as bimanual gynecological examination) remains the more important assessment method. | A | A | A |
| **Question 47: The FIGO 2018 staging system subdivides Stage IB into Stage IB1, IB2, and IB3. What are the specific diagnostic criteria for these three substages?** | | | | |
| Chunk size=512, Overlap=0 Using TokenTextSplitter | FIGO 2018 staging subdivides stage IB into IB1, IB2, and IB3. The specific diagnostic criteria for these three substages are as follows:  - IB1: Tumor maximum diameter ≤ 2 cm, and stromal invasion depth ≥ 5 mm (measured from the basement membrane or gland).   Document reference: "IB1 stage: stromal invasion depth ≥ 5 mm, maximum tumor diameter < 2 cm" and "T1b1 (FIGO IB1): stromal invasion depth > 5 mm, maximum diameter ≤ 2 cm".  - IB2: Tumor maximum diameter > 2 cm but ≤ 4 cm, and stromal invasion depth ≥ 5 mm.   Document reference: "IB2 stage: maximum tumor diameter ≥ 2 cm but < 4 cm" and "T1b2 (FIGO IB2): maximum diameter > 2 cm, ≤ 4 cm".  - IB3: Tumor maximum diameter ≥ 4 cm, and stromal invasion depth ≥ 5 mm.   Document reference: "IB3 stage: maximum tumor diameter ≥ 4 cm" and "T1b3 (FIGO IB3): maximum diameter > 4 cm".  These subdivisions are based on tumor size, with no consideration of horizontal spread (document states: "The new staging clarifies that both imaging and pathological findings can be used for staging", and "Invasion depth is measured downward from the basement membrane or gland of origin of the primary lesion"). Lower stage correlates with better prognosis, while IB3 carries a poorer prognosis. | A | A | A |
| Chunk size=256, Overlap=100 Using SentenceSplitter | IB1: Tumor confined to the cervix with maximum diameter <2 cm.  IB2: Tumor confined to the cervix with maximum diameter ≥2 cm but <4 cm.  IB3: Tumor confined to the cervix with maximum diameter ≥4 cm.   (Note: All cancer is microscopically confirmed. IB stage requires stromal invasion >5 mm. Subdivision is based solely on maximum tumor diameter, not depth of invasion.) | A | A | A |
| **Question 48: According to the FIGO 2018 staging system, what is the main difference between Stage IA1 and Stage IA2?** | | | | |
| Chunk size=512, Overlap=0 Using TokenTextSplitter | According to the FIGO 2018 staging system, the primary distinction between stages IA1 and IA2 lies in the depth of stromal invasion:  - Stage IA1: Stromal invasion depth ≤ 3 mm (measured from the basement membrane of the epithelium or gland) - Stage IA2: Stromal invasion depth > 3 mm but ≤ 5 mm (measured from the basement membrane of the epithelium or gland)  Key points: - Both stages represent microscopically diagnosed microinvasive carcinoma - Horizontal invasion width is no longer used as a staging criterion - Lymphovascular space invasion (LVSI) does not alter staging but influences treatment decisions (e.g., stage IA1 with positive LVSI should be managed as stage IA2) | A | A | A |
| Chunk size=256, Overlap=100 Using SentenceSplitter | According to FIGO 2018 staging, the main difference between IA1 and IA2 is as follows:  - Both IA1 and IA2 stages represent microscopically evident invasive carcinoma (maximum stromal invasion depth <5 mm), with the primary distinction being the depth of stromal invasion:  - IA1: Stromal invasion depth ≤3 mm.  - IA2: Stromal invasion depth >3 mm but ≤5 mm. - The document emphasizes that the revised staging no longer considers the horizontal spread of invasion (due to susceptibility to artifactual influences), and lymphovascular space invasion (LVSI) does not alter the stage but influences treatment decisions (e.g., LVSI positive cases are managed as higher risk). | C | C | C |
| **Question 49: According to the FIGO 2018 staging system, when lymph node metastasis is detected by imaging or pathology, how should the stage be specifically designated? What are the requirements for noting the method of detection in the report?** | | | | |
| Chunk size=512, Overlap=0 Using TokenTextSplitter | when lymph node metastasis is identified by imaging or pathology, the FIGO 2018 staging requires specific notation for both the stage and the method of detection to ensure data accuracy and subsequent analysis. the requirements are as follows:  - stage notation:  - if lymph node metastasis is detected by imaging, the stage is marked with "r" (e.g., pelvic lymph node metastasis staged as III C1r, para-aortic lymph node metastasis as III C2r). as explicitly stated: "if pelvic lymph node metastasis is found by imaging, the stage is III C1r" and "the accuracy of imaging assessment for parametrial and upper vaginal involvement is suboptimal... if pelvic lymph node metastasis is found by imaging, the stage is III C1r".  - if lymph node metastasis is confirmed by pathology (e.g., biopsy or surgery), the stage is marked with "p" (e.g., pelvic lymph node metastasis staged as III C1p, para-aortic lymph node metastasis as III C2p). as noted: "if identified by pathology, the stage is III C1p" and "the method of detection (imaging or pathology) must be specified for III C stage, e.g., ... if identified by pathology, the stage is III C1p".  - reporting requirements:  - the type of imaging or pathology technique used must be recorded (e.g., MRI, CT, PET-CT, fine needle aspiration, surgical biopsy). the document emphasizes: "the type of imaging and pathology techniques must be recorded" and "the imaging modality and pathology technique type used must be documented".  - for pathology methods, the specific technique must be annotated (e.g., N[f] for fine needle aspiration confirmation, N[sn] for sentinel lymph node biopsy confirmation). as stated: "the pathological technique used for confirmation must be annotated, such as N(f) indicating lymph node metastasis confirmed by fine needle aspiration or core needle biopsy".  - in the staging report, "r" or "p" must be clearly indicated to distinguish the detection method, facilitating data analysis and prognostic evaluation ("it is necessary to record whether this staging is based on imaging (r) or pathological confirmation (p) for appropriate data analysis and reporting").  this notation system helps prevent misdiagnosis (especially in areas with high prevalence of tuberculosis or inflammation) and ensures staging consistency. | B | A | A |
| Chunk size=256, Overlap=100 Using SentenceSplitter | according to FIGO 2018 staging, when lymph node metastasis is identified by imaging or pathology, the staging should be specifically marked as follows:  - If lymph node metastasis is detected by imaging methods (such as MRI, CT, or PET), add the suffix "r" to the stage designation (e.g., pelvic lymph node metastasis is staged as IIIC1r).  - If lymph node metastasis is confirmed by pathological methods (such as fine needle aspiration, core needle biopsy, or surgical biopsy), add the suffix "p" to the stage designation (e.g., pathologically confirmed pelvic lymph node metastasis is staged as IIIC1p).   Reporting requirements for lymph node metastasis discovery:  - The specific imaging modality used (e.g., ultrasound, CT, MRI, or PET) or the type of pathological technique (e.g., fine needle aspiration labeled as N(f), sentinel lymph node biopsy labeled as N(sn)) must be documented.  - For example: imaging showing pelvic lymph node metastasis is reported as IIIC1r with the imaging tool specified; pathological confirmation of para-aortic lymph node metastasis is reported as IIIC2p with the pathological technique specified.   The document emphasizes that if staging is controversial, the earlier stage should be assigned, and ITC (isolated tumor cells, diameter <0.2 mm) does not affect staging but must be recorded. | B | B | B |
| **Question 50: If cervical cancer is an incidental finding on pathological examination after an initial surgery of insufficient scope, what further diagnostic and therapeutic management is required for the patient?** | | | | |
| Chunk size=512, Overlap=0 Using TokenTextSplitter | - Further diagnosis:  - A complete staging evaluation must be performed, including:  - Imaging studies: such as pelvic MRI to assess tumor size and local invasion, PET-CT or CT to evaluate lymph node and distant metastasis.  - Pathological review**: Re-examination of the initial surgical specimen to confirm depth of invasion, margin status, and lymph node involvement. - Further treatment:  - No further treatment methods could be found in the knowledge base. | C | C | C |
| Chunk size=256, Overlap=100 Using SentenceSplitter | when cervical cancer is incidentally found on pathological examination, and the initial surgical extent was insufficient, the patient requires further diagnostic and therapeutic procedures, including:  - Comprehensive restaging evaluation, typically involving imaging (such as pelvic MRI and/or PET-CT) to assess tumor size, parametrial involvement, and distant metastasis. - Assessment of lymph node status, which may require sentinel lymph node mapping or completion lymphadenectomy if not performed during initial surgery. - Review of the original pathology slides to confirm histological type, grade, depth of stromal invasion, lymphovascular space invasion (LVSI), and margin status. - Determination of the need for adjuvant therapy based on restaged disease, which may include:  → Concurrent chemoradiation therapy (CCRT) for patients with high-risk features (e.g., positive margins, parametrial involvement, or positive lymph nodes).  → Adjuvant radiotherapy alone for intermediate-risk features (e.g., large tumor size, deep stromal invasion, positive LVSI) per criteria such as Sedlis or others.  → Close surveillance without adjuvant therapy for very low-risk cases (e.g., stage IA1 without LVSI and with negative margins). - Referral to a multidisciplinary tumor board for individualized treatment planning, involving gynecologic oncology, radiation oncology, medical oncology, and pathology. - Counseling regarding prognosis, treatment-related side effects, and follow-up protocols.  Note: As per the referenced knowledge base, "cervical invasive cancer found incidentally after hysterectomy is not staged clinically or included in treatment statistics and must be reported separately." However, this does not preclude the need for individualized diagnostic reassessment and therapeutic intervention based on pathological and clinical findings. Specific steps should align with current NCCN, FIGO, or institutional guidelines. | D | D | D |
| **Question 51: In cervical cancer treatment, if the patient does not wish to preserve fertility, and the stage is ⅠA1 without lymphovascular space invasion, what treatment measures should be taken?** | | | | |
| Chunk size=512, Overlap=0 Using TokenTextSplitter | for patients with cervical cancer who do not wish to preserve fertility, staged as IA1 without lymphovascular space invasion, the recommended treatment is:  - Extrafascial hysterectomy (also known as Type A hysterectomy)  This is a conservative surgical approach involving removal of the uterus and cervix without extensive parametrial resection or lymph node dissection, suitable for low-risk cases. Radiotherapy is not indicated as the primary treatment in this scenario.  Basis: "Stage IA1 LVSI-negative FIGO 2018 without fertility preservation: extrafascial hysterectomy" (Source: similarity 0.418 fragment). | A | A | A |
| Chunk size=256, Overlap=100 Using SentenceSplitter | For patients with stage IA1 cervical cancer who are negative for lymphovascular space invasion (LVSI-negative) and do not wish to preserve fertility, the recommended treatment options are:  - Extrafascial total hysterectomy  - Radiotherapy can be considered as an alternative, especially for patients with contraindications to surgery   Basis:  → Stage IA1 LVSI-negative FIGO 2018 without fertility preservation: Extrafascial total hysterectomy or radiotherapy  → Stage IA: Surgical treatment should be chosen for patients without surgical contraindications, while radiotherapy is indicated for those with contraindications to surgery | B | A | A |
| **Question 52: In cervical cancer treatment, if the patient does not wish to preserve fertility, and the stage is ⅠA1 with lymphovascular space invasion, what treatment measures should be taken?** | | | | |
| Chunk size=512, Overlap=0 Using TokenTextSplitter | - Response: According to the document content (e.g., Table 4 in the FIGO and NCCN guidelines referenced in similarity 0.510 and 0.418 fragments), for patients with IA1 stage cervical cancer with lymphovascular space invasion (LVSI positive) and no desire to preserve fertility, the Level I recommendation is modified radical hysterectomy (Type B hysterectomy) plus pelvic lymph node dissection. This involves removal of the uterus, part of the parametrium, and pelvic lymph nodes to reduce recurrence risk. Radiation therapy may be considered as an alternative (Level II recommendation), but surgery is the preferred approach.   Basis: "IA1 stage with lymphovascular space invasion – Level I recommendation: Type B hysterectomy + radical radiotherapy (external beam radiotherapy + vaginal brachytherapy) + pelvic lymph node dissection" (similarity 0.558 fragment), and "IA1 stage LVSI positive FIGO 2018 no fertility preservation: 1. Modified radical hysterectomy + pelvic lymph node dissection" (similarity 0.418 fragment). | A | A | A |
| Chunk size=256, Overlap=100 Using SentenceSplitter | For patients with stage IA1 cervical cancer accompanied by lymphovascular space invasion (LVSI positive) who do not wish to preserve fertility, the recommended treatment measures are:  - Modified radical hysterectomy + pelvic lymphadenectomy  - Or radiotherapy (radical radiotherapy, including external beam radiotherapy + vaginal brachytherapy)  Basis:  - For stage IA1 with lymphovascular space invasion, the Grade I recommendation is Type B hysterectomy (i.e., modified radical hysterectomy) + radical radiotherapy (external beam radiotherapy + vaginal brachytherapy) + pelvic lymphadenectomy.  - It is explicitly stated: Stage IA1, LVSI positive, FIGO 2018, no fertility preservation → 1. Modified radical hysterectomy + pelvic lymphadenectomy; 2. Radiotherapy. | A | A | A |
| **Question 53: In cervical cancer treatment, if the patient does not wish to preserve fertility, and the stage is ⅠA2, what treatment measures should be taken?** | | | | |
| Chunk size=512, Overlap=0 Using TokenTextSplitter | for IA2 stage cervical cancer patients who do not wish to preserve fertility:  - Level I recommendation: Type B hysterectomy (modified radical hysterectomy) + pelvic lymphadenectomy   This includes removal of the uterus, partial parametrial tissue, and pelvic lymph node dissection to address potential lymph node metastasis.  - Level II recommendation (for low-risk cases): Simple total hysterectomy + pelvic lymphadenectomy or sentinel lymph node biopsy   Type B hysterectomy remains the primary recommended option.  Radiotherapy is not recommended as the first-line treatment in this scenario.  Basis:  - "IA2 stage Level I recommendation: Type B hysterectomy + radical radiotherapy (external beam radiotherapy + vaginal brachytherapy) + pelvic lymphadenectomy" (similarity 0.558 fragment)  - "IA2 stage FIGO 2018 without fertility preservation: Type B hysterectomy + pelvic lymphadenectomy" (similarity 0.418 fragment) | A | B | A |
| Chunk size=256, Overlap=100 Using SentenceSplitter | For patients with stage IA2 cervical cancer who do not wish to preserve fertility, the recommended treatment measures are:  - Type B hysterectomy (modified radical hysterectomy) plus pelvic lymphadenectomy.  The basis comes from relevant descriptions in the document: - The [similarity: 0.600] fragment states: "Stage IA2 Grade I recommendation: Type B hysterectomy c,h + radical radiotherapy (external beam radiotherapy + vaginal brachytherapy) pelvic lymphadenectomy [22]." - The [similarity: 0.488] fragment clearly indicates: "Stage IA2 FIGO 2018 without fertility preservation: Type B hysterectomy c,h + pelvic lymphadenectomy." - The document explains that "Type B hysterectomy" refers to modified radical hysterectomy.  Therefore, the standard treatment regimen is Type B hysterectomy plus pelvic lymphadenectomy. | A | A | A |
| **Question 54: In cervical cancer treatment, if the patient does not wish to preserve fertility, and the stage is ⅠB1, ⅡA1, or IB2, what treatment measures should be taken?** | | | | |
| Chunk size=512, Overlap=0 Using TokenTextSplitter | for patients with cervical cancer who do not wish to preserve fertility and have stage IB1, IIA1, or IB2 disease, the recommended treatment is:  - **Level I recommendation**: Radical hysterectomy (type C) plus pelvic lymphadenectomy. This involves extensive removal of the uterus, parametrial tissues, upper vagina, and pelvic lymph nodes. Adjuvant radical radiotherapy (external beam radiotherapy + vaginal brachytherapy) ± platinum-based concurrent chemotherapy may be added, especially for high-risk features such as large tumor size or positive lymphovascular space invasion (LVSI), but surgery remains the core treatment. - **Level II recommendation**: Para-aortic lymphadenectomy.  Evidence:  - "For stage IB1, IB2, IIA1: Level I recommendation—Type C hysterectomy + pelvic lymph node dissection + adjuvant radical radiotherapy (external beam radiotherapy + vaginal brachytherapy) ± platinum-based concurrent chemotherapy" (similarity 0.558 fragment).  - "Stage IB1, FIGO 2018, no fertility preservation: Type C radical hysterectomy + pelvic lymph node dissection" (similarity 0.494 fragment). | A | B | A |
| Chunk size=256, Overlap=100 Using SentenceSplitter | For patients with stage IB1, IIA1, or IB2 cervical cancer who do not wish to preserve fertility, the recommended treatment is type C radical hysterectomy plus pelvic lymphadenectomy.  - Basis: The [similarity: 0.600] fragment states: "Stage IB1, IB2, IIA1 Grade I recommendation: Type C hysterectomy c,h + pelvic lymphadenectomy + radical radiotherapy (external beam radiotherapy + vaginal brachytherapy) ± platinum-based concurrent chemotherapy [21] + pelvic lymphadenectomy (category 1) d,e." Meanwhile, the [similarity: 0.442] fragment clearly states: "Stage IB1, IIA1 FIGO 2018 without fertility preservation: Type C radical hysterectomy + pelvic lymphadenectomy." The management approach for stage IB2 patients is the same (as described in the [similarity: 0.442] fragment). | B | B | B |
| **Question 55: In cervical cancer treatment, if the patient does not wish to preserve fertility, and the stage is ⅠB3 or ⅡA2, what treatment measures should be taken?** | | | | |
| Chunk size=512, Overlap=0 Using TokenTextSplitter | for cervical cancer patients who do not wish to preserve fertility and are staged as IB3 or IIA2, the level I recommended treatment is radical radiotherapy (external beam radiotherapy + vaginal brachytherapy) ± platinum-based concurrent chemotherapy.  according to the document: "For IB3 and IIA2 stages, Level I recommendation: radical radiotherapy (external beam radiotherapy + vaginal brachytherapy) ± platinum-based concurrent chemotherapy." additionally, "For IB3 and IIA2 stages (FIGO 2018) without fertility preservation: concurrent chemoradiotherapy" supports this recommendation, where "concurrent chemoradiotherapy" is equivalent to concurrent chemoradiotherapy. | C | B | B |
| Chunk size=256, Overlap=100 Using SentenceSplitter | For patients with cervical cancer staged as IB3 or IIA2 who do not wish to preserve fertility, the recommended treatment is concurrent chemoradiotherapy (i.e., concurrent chemoradiation).  - Basis: Relevant literature states, "For locally advanced cervical cancer (stages IB3 and IIA2), concurrent chemoradiotherapy is the preferred treatment." Additionally, another source explicitly notes, "FIGO 2018 stages IB3 and IIA2 without fertility preservation: concurrent chemoradiotherapy." In the document, "concurrent chemoradiotherapy" or "concurrent chemoradiation" refers to radiotherapy combined with platinum-based chemotherapy. | B | B | B |
| **Question 56: In cervical cancer treatment, if the patient wishes to preserve fertility, and the stage is ⅠA1 without lymphovascular space invasion, what treatment measures should be taken?** | | | | |
| Chunk size=512, Overlap=0 Using TokenTextSplitter | For patients with FIGO IA1 cervical cancer without lymphovascular space invasion (LVSI negative) who wish to preserve fertility, the recommended treatment is cervical conization. After the procedure, ensure negative margins and conduct regular follow-up. For example:  - The segment with similarity 0.539 states: “IA1 stage, fertility preservation desired, LVSI (-): cervical conization may be performed; follow-up if margins are negative.”  - The segment with similarity 0.464 further confirms: “IA1 stage, LVSI negative, FIGO 2018, fertility preservation: conization.”  This approach applies to cases with tumor invasion depth ≤3mm and no vascular infiltration, aiming to remove the lesion while preserving the uterus. | A | A | A |
| Chunk size=256, Overlap=100 Using SentenceSplitter | in the treatment of cervical cancer, if the patient wishes to preserve fertility, is staged as IA1 without lymphovascular space invasion, the recommended treatment is conization (cone biopsy) with negative margins (at least 3 mm negative margin). If margins are positive, repeat conization or trachelectomy is indicated. - Basis: Multiple references in the document (e.g., segments with similarity 0.604, 0.494) state that for IA1 stage with negative lymphovascular space invasion (LVSI negative), conization is a Level I recommendation for fertility preservation. The NCCN guidelines also support this approach. | B | A | A |
| **Question 57: In cervical cancer treatment, if the patient wishes to preserve fertility, and the stage is ⅠA1 with lymphovascular space invasion or ⅠA2, what treatment measures should be taken?** | | | | |
| Chunk size=512, Overlap=0 Using TokenTextSplitter | in the treatment of cervical cancer, if the patient wishes to preserve fertility and is staged as FIGO IA1 with lymphovascular space invasion (LVSI positive) or IA2, the recommended treatment is radical trachelectomy with pelvic lymphadenectomy. For example:  - In the [similarity: 0.539] segment, it states: “Stage IA2... For those wishing to preserve fertility: (1) cervical conization + laparoscopic (or extraperitoneal) pelvic lymphadenectomy. (2) Radical trachelectomy via abdominal, vaginal, or laparoscopic approach with pelvic lymphadenectomy.”  - In the [similarity: 0.464] segment, for IA1 with LVSI positive, it notes: “NCCN 2019 fertility-sparing: conization + pelvic lymph node dissection + radical trachelectomy + pelvic lymph node dissection.”  This approach applies to cases with invasion depth >3 mm but ≤5 mm (IA2) or IA1 with LVSI positive, and requires lymph node assessment to reduce recurrence risk. | B | B | B |
| Chunk size=256, Overlap=100 Using SentenceSplitter | in the treatment of cervical cancer, if the patient wishes to preserve fertility and is staged as IA1 with lymphovascular space invasion or IA2, the recommended treatment is radical trachelectomy combined with pelvic lymphadenectomy. The surgery can be performed via abdominal, vaginal, or laparoscopic approach, ensuring negative pathological lymph nodes. - Basis: The document explicitly states (e.g., in passages with similarity scores of 0.604, 0.509) that for IA1 with positive LVSI or IA2, pelvic lymph node dissection is required, and for those wishing to preserve fertility, radical trachelectomy plus pelvic lymphadenectomy is indicated (such as "patients wishing to preserve fertility may choose radical trachelectomy plus pelvic lymph node dissection"). | B | C | B |
| **Question 58: In cervical cancer treatment, if the patient wishes to preserve fertility, and the stage is ⅠB1, what treatment measures should be taken?** | | | | |
| Chunk size=512, Overlap=0 Using TokenTextSplitter | for patients with stage IB1 cervical cancer who wish to preserve fertility, the recommended treatment is radical trachelectomy plus pelvic lymphadenectomy.  - "Stage IB1 FIGO 2018 fertility-sparing: radical trachelectomy + pelvic lymphadenectomy". - "For those wishing to preserve fertility: radical trachelectomy + pelvic lymphadenectomy".  This treatment is suitable for patients with tumor diameter ≤2 cm, aiming to completely remove the lesion while preserving uterine function. The surgical approach may be open, laparoscopic, or robot-assisted. | A | A | A |
| Chunk size=256, Overlap=100 Using SentenceSplitter | in the treatment of cervical cancer, if the patient wishes to preserve fertility and is staged as IB1, the recommended treatment is radical trachelectomy (which may be performed vaginally, abdominally, or laparoscopically) combined with pelvic lymphadenectomy. The tumor should be exophytic with a diameter ≤4 cm (ideally ≤2 cm is preferred), and endophytic/cervical canal-type tumors should be excluded. - **Basis**: The document indicates (segments with similarity 0.607, 0.494, etc.) that for IB1 stage cervical cancer with fertility preservation, the surgical approach is "vaginal" radical trachelectomy, requiring resection of the cervix and parametrial tissue, and emphasizes individualized assessment of tumor growth pattern. | B | B | B |
| **Question 59: In cervical cancer treatment, if the patient wishes to preserve fertility, and the stage is ⅠB2, what treatment measures should be taken?** | | | | |
| Chunk size=512, Overlap=0 Using TokenTextSplitter | in the treatment of cervical cancer, if the patient wishes to preserve fertility and is staged as IB2, the recommended treatment measures are:  - Generally, fertility-sparing approaches are not recommended. - Standard treatment is radical hysterectomy or concurrent chemoradiotherapy.  - Contextual information emphasizes that IB2 stage (tumor diameter >2 cm and ≤4 cm) carries a high risk of recurrence, making fertility preservation unfeasible.  - Literature does not recommend conservative options such as radical trachelectomy; priority is given to radical surgery or chemoradiotherapy to control the disease. | D | D | D |
| Chunk size=256, Overlap=100 Using SentenceSplitter | in the treatment of cervical cancer, if the patient wishes to preserve fertility and is staged as IB2, the following treatment measures may be considered:  - Radical trachelectomy (abdominal or laparoscopic) combined with pelvic lymphadenectomy may be considered, but requires strict evaluation (tumor diameter ≤4 cm, exophytic type, no involvement of the lower uterine segment). - In the new staging system, fertility preservation in IB2 stage (tumor 2–4 cm) has limited feasibility and requires cautious patient selection.  - Basis: The document states (segments with similarity 0.607, 0.486, etc.) that for IB2 stage, surgery may be performed "via abdominal or laparoscopic approach," but emphasizes that endophytic or cervical canal-type tumors are not suitable for uterine corpus preservation, and IB3 stage (>4 cm) is not recommended for fertility-sparing treatment. | A | A | A |
| **Question 60: In cervical cancer treatment, if the stage is ⅡB, ⅢA, or ⅢB, what treatment measures should be taken?** | | | | |
| Chunk size=512, Overlap=0 Using TokenTextSplitter | for cervical cancer treatment, if the staging is IIB, IIIA, or IIIB, the preferred treatment measure is concurrent chemoradiotherapy (external beam radiotherapy + vaginal brachytherapy ± platinum-based concurrent chemotherapy), regardless of fertility preservation. for example:  - in the [similarity: 0.569] segment, it is stated: "for IB to IVA stage cervical cancer, the preferred treatment is concurrent chemoradiotherapy."  - in the [similarity: 0.539] segment, it is explicitly noted: "IIB stage FIGO 2018 without fertility preservation: concurrent chemoradiotherapy" and "III stage FIGO 2018 without fertility preservation: concurrent chemoradiotherapy" (III stage includes IIIA and IIIB).  - in the [similarity: 0.526] segment, it is supplemented: "IIB stage: radiotherapy is generally indicated... III stage: radiotherapy should be used for all, or combined chemotherapy and radiotherapy."  this regimen applies to cases where the tumor extends beyond the cervix but without distant metastasis, emphasizing combined chemoradiotherapy to improve efficacy. | A | A | A |
| Chunk size=256, Overlap=100 Using SentenceSplitter | in the treatment of cervical cancer, for stages IIB, IIIA, or IIIB, the recommended treatment is:  → Primary treatment: concurrent chemoradiotherapy (external beam radiotherapy to the pelvis + brachytherapy + concurrent platinum-based chemotherapy).  → Surgery is not routinely recommended and is only considered in cases of limited radiotherapy resources or special circumstances.  - Basis: The document explicitly states (e.g., similarity scores 0.607, 0.478) that for stage IIB and above, chemoradiotherapy is the mainstay, with level I recommendation being "pelvic EBRT + brachytherapy + concurrent platinum-based chemotherapy." Fertility-sparing approaches are not mentioned, as they are unsuitable for advanced-stage patients. | A | A | A |
| **Question 61: In cervical cancer treatment, if the stage is ⅢC1, what treatment measures should be taken?** | | | | |
| Chunk size=512, Overlap=0 Using TokenTextSplitter | response:  For cervical cancer staged as IIIC1, the recommended treatment is concurrent chemoradiotherapy (i.e., external beam radiotherapy combined with vaginal brachytherapy, supplemented by platinum-based concurrent chemotherapy).  - Basis:   - [Similarity: 0.459] The fragment states: "In FIGO staging, these are respectively III C1 and III C2... For locally advanced cervical cancer, guidelines recommend concurrent chemoradiotherapy as the first choice."   - [Similarity: 0.553] The fragment indicates: "For cervical cancer from IB to IVA stage, the preferred treatment is concurrent chemoradiotherapy." (IIIC stage falls within the locally advanced category).   - [Similarity: 0.486] The fragment adds: "For these patients (including those with lymph node metastasis)... adjuvant pelvic external beam radiotherapy after surgery can reduce local recurrence," but surgery is not the first choice for IIIC1; instead, chemoradiotherapy is initiated directly.  Therefore, the standard treatment is concurrent chemoradiotherapy. | A | A | A |
| Chunk size=256, Overlap=100 Using SentenceSplitter | For cervical cancer treatment, if the stage is IIIC1 (involving pelvic lymph nodes), the recommended treatment measures are as follows:  - Level I recommendation: External beam radiotherapy (EBRT) to the pelvis ± para-aortic region + vaginal brachytherapy + concurrent platinum-based chemotherapy. - Level II recommendation: External beam radiotherapy (EBRT) to the pelvis ± para-aortic region + vaginal brachytherapy. - Level III recommendation: Neoadjuvant chemotherapy + external beam radiotherapy (EBRT) to the pelvis ± para-aortic region + vaginal brachytherapy + concurrent platinum-based chemotherapy.  These recommendations are based on stratification (imaging studies) and emphasize combined modality therapy, with radiotherapy and chemotherapy as the main components. The specific chemotherapy regimen is not specified in the document, but concurrent platinum-based chemotherapy is a core component. | A | A | A |
| **Question 62: In cervical cancer treatment, if the stage is ⅢC2, what treatment measures should be taken?** | | | | |
| Chunk size=512, Overlap=0 Using TokenTextSplitter | response:  IIIC2 stage cervical cancer refers to involvement of para-aortic lymph nodes (specify based on imaging [r] or pathology [p]). The preferred treatment is concurrent chemoradiation (external beam radiotherapy + vaginal brachytherapy + platinum-based concurrent chemotherapy), with possible extension of the radiation field to the para-aortic region.  - Basis:   - [Similarity: 0.459] Fragment clearly states: "In FIGO staging, these are respectively III C1 and III C2... For locally advanced cervical cancer, guidelines recommend concurrent chemoradiation as the first choice."   - [Similarity: 0.460] Fragment mentions: "Para-aortic lymph node metastasis is classified as III C2 stage... Pre-treatment lymph node staging may assist in planning, but concurrent chemoradiation remains the first choice."   - [Similarity: 0.553] Fragment emphasizes concurrent chemoradiation as the preferred option for IB to IVA stages, applicable to IIIC2.   The documents do not mention surgery as the first-line option; thus, concurrent chemoradiation is the standard regimen. | A | A | A |
| Chunk size=256, Overlap=100 Using SentenceSplitter | no information is available in the provided documents regarding specific treatment measures for stage IIIC2 cervical cancer (defined by para-aortic lymph node metastasis). The documents detail treatment for stage IIIC1 (extended-field radiotherapy + vaginal brachytherapy + concurrent platinum-based chemotherapy) and mention "stratification: pathological cytology" under the broader IIIC category, but do not specify recommendations for IIIC2. Therefore, the answer cannot be found in the knowledge base. | D | D | D |
| **Question 63: In cervical cancer treatment, if the stage is ⅣA without lymph node enlargement, what treatment measures should be taken?** | | | | |
| Chunk size=512, Overlap=0 Using TokenTextSplitter | in the treatment of cervical cancer, if the stage is IVA and there is no lymph node enlargement, the following treatment measures should be taken:  Treatment measures: Level I recommendation: Radical radiotherapy ± platinum-based concurrent chemotherapy. - Basis: As stated in the context, IVA stage (defined as tumor invasion into the mucosa of the bladder or rectum, or extension beyond the true pelvis) regardless of lymph node status (including no lymph node enlargement), the preferred treatment is radical radiotherapy (including external beam radiotherapy and intracavitary brachytherapy) or concurrent chemoradiotherapy. The chemotherapy regimen is typically based on cisplatin. | A | A | A |
| Chunk size=256, Overlap=100 Using SentenceSplitter | For cervical cancer treatment, if the stage is IVA and there is no lymph node enlargement, the recommended treatment measure is:  Based on the provided context, IVA stage is defined as tumor infiltration into the bladder and/or rectal mucosa, but without spread beyond the true pelvis. The documents state that for central lesions involving the bladder and/or rectum (i.e., IVA stage), pelvic exenteration (pelvic evisceration) may be chosen if complete resection is possible. For example: - “Stage IV: Mainly treated with radiotherapy, or combined chemotherapy and radiotherapy. For central lesions involving the bladder and/or rectum, pelvic exenteration may be chosen if complete resection is possible.” - “4.1.4 FIGO Stage IVA or recurrent cervical cancer: Patients with IVA stage who have only central lesions without pelvic wall or distant metastasis are extremely rare. Those who are treatment-naive or have recurrence under such circumstances may consider pelvic exenteration.”  The documents do not specifically address the impact of lymph node status on IVA stage treatment. However, for central lesions without lymph node enlargement, pelvic exenteration remains a feasible option. Radiotherapy and chemotherapy may also serve as adjuvant or alternative treatments, but the context does not provide specific stratified recommendations for cases without lymph node enlargement. | D | D | D |
| **Question 64: In cervical cancer treatment, if the stage is ⅣA with lymph node enlargement, what treatment measures should be taken?** | | | | |
| Chunk size=512, Overlap=0 Using TokenTextSplitter | in the treatment of cervical cancer, if the stage is IVA and there is lymph node enlargement, the following treatment measures should be adopted:  Level I recommended treatment: Radical radiotherapy or concurrent chemoradiotherapy (CCRT), with adjustment of the radiation field based on the location of lymph node enlargement (e.g., extended to the pelvic or para-aortic regions). - Context note: Stage IVA itself is already locally advanced; lymph node enlargement (possibly a feature of stage IIIC) does not alter the fundamental treatment principle, but the involved lymph node regions (such as pelvic or para-aortic) must be included in the radiotherapy plan to enhance local control. Concurrent chemoradiotherapy is the preferred option, with cisplatin-based chemotherapy regimens. | A | B | A |
| Chunk size=256, Overlap=100 Using SentenceSplitter | no answer found in the provided documents. | D | D | D |
| **Question 65: In cervical cancer treatment, if the stage is ⅣB, what treatment measures should be taken?** | | | | |
| Chunk size=512, Overlap=0 Using TokenTextSplitter | in the treatment of cervical cancer, if the staging is IVB, the following treatment measures should be adopted:  treatment measures: systemic chemotherapy is recommended as the primary approach, which may be combined with palliative radiotherapy or targeted therapy. - rationale: the context specifies that IVB stage (defined as distant metastasis, e.g., to the abdomen, lungs, or bones) centers on systemic therapy, with platinum-based chemotherapy regimens (such as carboplatin/paclitaxel) being the first choice. radiotherapy is used for symptom relief (e.g., bone metastasis pain), and targeted therapy (e.g., bevacizumab) may be considered in specific cases. the treatment goal is palliative and to control disease progression.  note: all treatment measures above are derived from the specified literature; specific regimens must be adjusted by clinicians based on individual patient factors (e.g., age, comorbidities). other sources (e.g., surgical textbooks) do not directly address treatment decisions for advanced stages and are therefore not cited. | A | A | A |
| Chunk size=256, Overlap=100 Using SentenceSplitter | In the treatment of cervical cancer, if the staging is IVB (the tumor has spread beyond the true pelvis), the treatment principles are as follows: - Systemic therapy (such as chemotherapy) is generally the mainstay of treatment. - Individualized radiotherapy may be combined for some patients.  The document emphasizes that systemic therapy is the core approach, with radiotherapy serving as an adjunct. Specific regimens, such as chemotherapy drugs or radiotherapy doses, are not detailed and should be individualized based on the patient’s condition. | C | C | C |
| **Question 66: After radical surgery for early cervical cancer, if the abdominal aortic lymph nodes are negative but high-risk factors are present, what treatment measures should be taken?** | | | | |
| Chunk size=512, Overlap=0 Using TokenTextSplitter | after radical surgery for early-stage cervical cancer, if para-aortic lymph nodes are negative but high-risk factors are present, the recommended treatment measures are as follows:  - Level I recommendation: pelvic external beam radiotherapy + platinum-based concurrent chemotherapy ± brachytherapy.  - Level II recommendation: sequential chemoradiation (i.e., chemotherapy followed by radiotherapy).  These recommendations are based on a stratified strategy for postoperative adjuvant therapy, aimed at reducing recurrence risk and improving progression-free survival. The document explicitly states that in the presence of high-risk factors, further imaging is required to exclude distant metastases; if none are found, the above combined radiotherapy and chemotherapy regimen should be adopted (source: section "9. Postoperative Adjuvant Therapy for Early-Stage Cervical Cancer After Radical Surgery" in [similarity: 0.548] fragment). | A | B | B |
| Chunk size=256, Overlap=100 Using SentenceSplitter | For early-stage cervical cancer after radical surgery, if the para-aortic lymph nodes are negative but high-risk factors are present, the recommended treatment measures are:  - Category 1 recommendation: Pelvic external beam radiotherapy + platinum-based concurrent chemotherapy ± brachytherapy (e.g., vaginal brachytherapy). - Category 2 recommendation: Sequential chemoradiotherapy (i.e., chemotherapy followed by radiotherapy). - Basis: The literature clearly indicates that high-risk factors include positive surgical margins, lymph node metastasis, or parametrial invasion. Postoperative adjuvant therapy (PORT) should include pelvic external beam radiotherapy and concurrent chemotherapy to improve survival rates (see [similarity: 0.576] excerpt: "Para-aortic lymph nodes negative Stratification: High-risk factorsa Category 1 recommendation: Pelvic external beam radiotherapyc + platinum-based concurrent chemotherapy ± brachytherapyd Category 2 recommendation: Sequential chemoradiotherapye"). The GOG109 study confirmed that this regimen provides an overall survival advantage. | A | A | A |
| **Question 67: After radical surgery for early cervical cancer, if the abdominal aortic lymph nodes are negative but intermediate-risk factors are present, what treatment measures should be taken?** | | | | |
| Chunk size=512, Overlap=0 Using TokenTextSplitter | for early-stage cervical cancer patients who have undergone radical surgery with negative para-aortic lymph nodes but presence of intermediate-risk factors, the recommended treatment is:  - **Level I recommendation:** Pelvic external beam radiotherapy (EBRT) ± vaginal brachytherapy. - **Level III recommendation:** Pelvic EBRT combined with platinum-based concurrent chemotherapy ± brachytherapy may be considered, but Level I recommendation is preferred.   - **Evidence:** The document states ([similarity: 0.624]): “Stratification: intermediate-risk factors b — Level I recommendation: pelvic external beam radiotherapy ± brachytherapy.” Intermediate-risk factors are defined by the Sedlis criteria (based on tumor size, stromal invasion depth, and lymphovascular space invasion [LVSI] status). Histological type such as adenocarcinoma may increase risk, but adjuvant therapy remains primarily radiotherapy-based. | A | A | A |
| Chunk size=256, Overlap=100 Using SentenceSplitter | after radical surgery for early-stage cervical cancer, if the para-aortic lymph nodes are negative but intermediate-risk factors are present, the following treatment measures are recommended: - Level I recommendation: Pelvic external beam radiotherapy (EBRT) ± brachytherapy (e.g., vaginal brachytherapy). - Level III recommendation: Pelvic EBRT + platinum-based concurrent chemotherapy ± brachytherapy (only considered in specific situations, such as presence of multiple intermediate-risk factors). - Basis: The document emphasizes that intermediate-risk factors include tumor size >4 cm, lymphovascular space invasion, or deep stromal invasion. When two intermediate-risk factors are present, adjuvant radiotherapy is required, but concurrent chemotherapy is not added (see [similarity: 0.576] excerpt: "Para-aortic lymph nodes negative Stratification: intermediate-risk factor b Level I recommendation: Pelvic EBRT ± brachytherapy Level III recommendation: Pelvic EBRT + platinum-based concurrent chemotherapy ± brachytherapy"). Low-risk patients (without high or intermediate-risk factors) do not require adjuvant treatment. | A | A | A |
| **Question 68: After radical surgery for early cervical cancer, if the abdominal aortic lymph nodes are positive but there is no distant metastasis, what treatment measures should be taken?** | | | | |
| Chunk size=512, Overlap=0 Using TokenTextSplitter | after radical surgery for early-stage cervical cancer, if para-aortic lymph nodes are positive but there is no distant metastasis, the recommended treatment measures are as follows:  - Level I recommendation: Extended-field radiotherapy (covering pelvic and para-aortic regions) + concurrent platinum-based chemotherapy ± brachytherapy.  The document states that distant metastasis must be excluded via imaging or biopsy. Extended-field radiotherapy targets potential metastatic sites, and chemotherapy (e.g., cisplatin or carboplatin) is used as a radiosensitizer. This regimen reduces the risk of local recurrence and improves survival rates (source: Section "9. Adjuvant Therapy After Radical Surgery for Early-Stage Cervical Cancer" in [Similarity: 0.548] fragment). | B | B | B |
| Chunk size=256, Overlap=100 Using SentenceSplitter | after radical surgery for early-stage cervical cancer, if para-aortic lymph nodes are positive but there is no distant metastasis, the recommended treatment measures are:  - Level I recommendation: Extended-field radiotherapy (covering the para-aortic region) + platinum-based concurrent chemotherapy ± brachytherapy.  - Rationale: The document states that in cases of positive para-aortic lymph nodes without distant metastasis, extended-field radiotherapy (extending to the para-aortic region) combined with concurrent chemotherapy should be administered to control potential micrometastases (see [similarity: 0.576] excerpt: "For patients with positive para-aortic lymph nodes without distant metastasis, Level I recommendation: Extended-field radiotherapy (covering the para-aortic region) + platinum-based concurrent chemotherapy ± brachytherapy"). The dose is typically 45–50 Gy, and intensity-modulated radiotherapy (IMRT) may reduce adverse effects.   # | A | A | A |
| **Question 69: What are the surgical treatment options for patients with FIGO stage IA1 cervical cancer? Are they suitable for patients with preserved fertility?** | | | | |
| Chunk size=512, Overlap=0 Using TokenTextSplitter | what are the surgical treatment options for FIGO stage IA1 cervical cancer patients? are these options applicable to patients wishing to preserve fertility?  according to the document content, the surgical treatment options for FIGO stage IA1 cervical cancer patients and their applicability to fertility preservation are as follows:  - surgical treatment options:   - for patients requiring fertility preservation and with LVSI(-) (lymphovascular space invasion negative): cervical conization is feasible; those with negative margins are followed up with observation.   - for patients not requiring fertility preservation or elderly patients: radical hysterectomy is recommended.   - if LVSI(+), modified radical hysterectomy + pelvic lymphadenectomy should be performed (not applicable for fertility preservation).   the surgical approach may be abdominal, vaginal, or laparoscopic.  - applicability to fertility preservation: yes, applicable for patients wishing to preserve fertility. specifically, if LVSI(-), cervical conization is the preferred option to preserve fertility; after negative margins, only follow-up is needed, with no further surgery required. however, if LVSI(+), fertility preservation is not suitable, and more extensive surgery is needed (source: section "4.1.1.1 Stage IA1" in [similarity: 0.553] fragment). | A | A | A |
| Chunk size=256, Overlap=100 Using SentenceSplitter | - Surgical treatment options:  - For patients desiring fertility preservation: If lymphovascular space invasion (LVSI) is negative, cervical conization is recommended (patients with negative margins are followed up). If LVSI is positive, modified radical hysterectomy + pelvic lymphadenectomy should be performed.  - For patients not desiring fertility preservation: Subfascial total hysterectomy is recommended (can be performed via abdominal, vaginal, or laparoscopic approach). - Applicable to patients desiring fertility preservation: Yes, it is applicable. Patients desiring fertility preservation may choose cervical conization (when LVSI is negative), or radical trachelectomy (via abdominal, vaginal, or laparoscopic approach) combined with pelvic lymphadenectomy (when LVSI is positive). - Basis: The document explicitly describes the management plan for stage IA1 (see [similarity: 0.591] excerpt: "4.1.1.1 Stage IA1: For those requiring fertility preservation, LVSI (-) may undergo cervical conization... For those not requiring fertility preservation and elderly women, subfascial total hysterectomy is recommended" and [similarity: 0.534] excerpt Table 4: "FIGO 2018 fertility-sparing: conization"). Fertility-sparing options are emphasized in multiple excerpts (e.g., [similarity: 0.549] excerpt). | A | A | A |
| **Question 70: In patients with FIGO stage IB2 and IIA1, what factors determine the choice between surgery and radiotherapy? What are the differences in outcomes between the two modalities?** | | | | |
| Chunk size=512, Overlap=0 Using TokenTextSplitter | in FIGO stage IB2 and IIA1 patients, the factors determining the choice between surgery and radiotherapy are as follows, and the outcomes of the two treatment modalities are similar:  - Determining factors:   - Patient factors: age (especially patients under 45 years old are prioritized for surgery to preserve ovarian and sexual function), fertility requirements, general condition (e.g., absence of surgical contraindications).   - Tumor factors: tumor size, histological type (e.g., adenocarcinoma may favor radiotherapy), lymphovascular space invasion (LVSI) status.   - Resource factors: availability of local healthcare resources (e.g., completeness of radiotherapy equipment).   The document emphasizes that surgery and radiotherapy are equivalent primary treatment options, depending on individualized assessment (source: "FIGO IB2/IIA1 stage" section in [similarity: 0.624] fragment).  - Differences in treatment outcomes:   - Efficacy: The 5-year survival rate, mortality rate, and complication incidence are similar between surgery and radiotherapy, indicating comparable efficacy.   - Surgical advantages: Surgery provides accurate postoperative pathological staging, facilitating individualized subsequent treatment; removes radioresistant tumors; preserves ovarian function (via ovarian transposition) in young women; and is the preferred option for preserving sexual function.   - Radiotherapy advantages: Suitable for patients with surgical contraindications, avoiding surgical complications (e.g., urinary tract injury).   The document does not mention significant differences in survival rates but notes that minimally invasive surgery (e.g., laparoscopy) may have a higher recurrence rate than open surgery, requiring further research (source: "FIGO IB2/IIA1 stage" section in [similarity: 0.624] fragment and "IB1, IB2, IIA1 stage" section in [similarity: 0.577] fragment). | B | B | B |
| Chunk size=256, Overlap=100 Using SentenceSplitter | For patients with FIGO stages IB2 and IIA1, the factors influencing the choice between surgery and radiotherapy are as follows, with both treatment modalities yielding similar outcomes:  - **Determining Factors:**   - **Patient Factors:** Age (younger patients, especially those <45 years who wish to preserve ovarian and sexual function, tend to favor surgery), fertility desires, presence of surgical contraindications (e.g., anesthesia risks), and tumor characteristics (e.g., radioresistance).   - **Resource Factors:** Availability of local medical resources (e.g., adequacy of radiotherapy equipment). In regions with limited radiotherapy resources, surgery may be more feasible.   - **Treatment Outcome Comparison:**   - **Surgery vs. Radiotherapy:** Both approaches demonstrate comparable efficacy, with similar 5-year survival rates, mortality rates, and complication rates. Advantages of surgery include: preservation of ovarian function (achievable via ovarian transposition to avoid radiation damage), provision of accurate pathological staging to guide subsequent individualized treatment, and removal of radioresistant tumors. Radiotherapy may lead to associated complications (e.g., vaginal atrophy or rectal reactions), which are particularly unfavorable for premenopausal patients.   - **Specific Outcomes:** The document notes that surgery and radical radiotherapy for early-stage cervical cancer yield equivalent results in terms of local control and survival rates (see excerpt [Similarity: 0.575]: "For early-stage cervical cancer, surgery and radical radiotherapy demonstrate comparable efficacy, with similar 5-year survival rates, mortality rates, and complication rates"). However, younger patients tend to prefer surgery for functional preservation, while radiotherapy serves as an alternative when surgery is contraindicated.   - **Basis:** The document elaborates on the selection criteria for stages IB2/IIA1 (see excerpts [Similarity: 0.549]: "Primary treatment includes surgery or radiotherapy, depending on patient factors and local healthcare resources, with both showing equivalent efficacy. Surgical advantages include... Surgery is the preferred treatment for young women seeking to preserve ovarian and sexual function" and [Similarity: 0.521]: "For premenopausal patients, particularly those under 45 years without surgical contraindications, surgical treatment may be chosen").   All responses are based solely on the provided document excerpts; no external knowledge has been added. If specific details (e.g., exact survival rate data) are not explicitly stated in the document, speculation is avoided. | A | A | A |
| **Question 71: What is the recommended treatment of choice for FIGO stage IB3 cervical cancer?** | | | | |
| Chunk size=512, Overlap=0 Using TokenTextSplitter | 71. What is the recommended primary treatment for cervical cancer at FIGO stage IB3?  According to the document content, the preferred treatment for FIGO stage IB3 cervical cancer is concurrent chemoradiotherapy (CCRT). Specific evidence includes: - Multiple sections state that IB3 stage is classified as locally advanced cervical cancer, and the primary treatment is platinum-based concurrent chemoradiotherapy (CCRT). For example:  - [Similarity: 0.607] Section: "FIGO ⅠB3/ⅡA2 stage... concurrent chemoradiotherapy (CCRT) is a better treatment option for patients with stage ⅠB3/ⅡA2."  - [Similarity: 0.583] Section: "Platinum-based concurrent chemoradiotherapy (CCRT) is a better treatment option for patients with stage ⅠB3/ⅡA2."  - [Similarity: 0.555] Section: "CCRT is the standard treatment for stage ⅠB3 and ⅡA2." - The document emphasizes that surgery is not the primary option, as approximately 80% of patients require adjuvant radiotherapy post-surgery, increasing the risk of complications (such as severe adverse reactions from dual therapy). In areas with limited radiotherapy resources, neoadjuvant chemotherapy (NACT) followed by surgery may be considered, but this is only an alternative option and remains controversial. - Summary: The primary treatment for stage IB3 cervical cancer is concurrent chemoradiotherapy (CCRT), including external beam radiotherapy (EBRT) and intracavitary brachytherapy (ICRT), combined with concurrent platinum-based chemotherapy. | A | A | A |
| Chunk size=256, Overlap=100 Using SentenceSplitter | the preferred initial treatment for FIGO stage IB3 cervical cancer is concurrent chemoradiotherapy (CCRT).  Based on the document content: - "Although surgery is an option for stage IB3 and IIA2, it is not recommended as the preferred initial treatment. Because 80% of patients require postoperative adjuvant radiotherapy (PORT) or CCRT. The combination of surgery and radiotherapy increases complications and affects quality of life. Dual treatment modalities also place unnecessary surgical and radiotherapy resource burdens. Therefore, CCRT is the standard treatment for stage IB3 and IIA2." (similarity 0.630 segment) - CCRT includes external beam radiotherapy (EBRT) and intracavitary brachytherapy (ICRT). The document also states that in areas with scarce radiotherapy resources, neoadjuvant chemotherapy (NACT) followed by surgery may be considered, but this is only an alternative and remains controversial: "The use of neoadjuvant chemotherapy plus surgery for IB3 and IIA2 cervical cancer is still controversial and is generally recommended only for areas where radiotherapy is unavailable or in clinical trials." (similarity 0.593 segment)  Therefore, the preferred treatment is concurrent chemoradiotherapy (CCRT), and surgery is not recommended as the initial approach. | A | C | C |
| **Question 72: what is the difference between the different types of radical hysterectomy? For which patients is it indicated?** | | | | |
| Chunk size=512, Overlap=0 Using TokenTextSplitter | the differences between types of radical hysterectomy and their applicable patient groups are as follows:  - **Type A (Extrafascial hysterectomy):**  - **Difference:** Minimal resection range; only the uterus and cervix are removed, without ureteral tunnel dissection; cardinal ligaments and uterosacral ligaments are transected at the cervical margin; no vaginal margin resection.  - **Applicable patients:** FIGO stage IA1 cervical cancer (without lymphovascular space invasion).  - **Source:** [Similarity: 0.555] excerpt (Table 2 description) and [Similarity: 0.449] excerpt.  - **Type B (Modified radical hysterectomy):**  - **Difference:** Intermediate resection range; includes uterus, cervix, and upper 1–2 cm of vagina; the top of the ureteral tunnel is opened and the ureter is laterally displaced; partial resection of the vesicouterine ligament and uterosacral ligament.  - **Applicable patients:** Stage IA1 with lymphovascular space invasion (LVSI+) or stage IA2 cervical cancer.  - **Source:** [Similarity: 0.555] excerpt and [Similarity: 0.449] excerpt.  - **Type C (Radical hysterectomy):**  - **Difference:** Maximal resection range; includes uterus, cervix, and upper 1/4–1/3 of vagina; complete ureteral mobilization; cardinal ligaments transected adjacent to pelvic sidewall, uterosacral ligaments transected near sacral origin; pelvic lymphadenectomy is required.  - **Applicable patients:** Stage IB1, IB2, and selected IIA1 cervical cancer (especially low-risk cases with tumor diameter <2 cm). Nerve-sparing techniques may be considered in low-risk cases to reduce complications.  - **Source:** [Similarity: 0.607] excerpt and [Similarity: 0.449] excerpt.  - **Additional notes:**  - Surgical approach may be abdominal, laparoscopic, or robotic; however, minimally invasive surgery may increase recurrence risk in early cervical cancer (based on LACC trial).  - Lymph node dissection is a fundamental step; resected areas include parametrial, obturator, internal iliac, external iliac, and common iliac lymph nodes.  - Summary of applicable patients: Type A for early low-risk (stage IA1), Type B for intermediate-risk (stage IA1 with LVSI+ or IA2), Type C for high-risk (stage IB1–IB2/IIA1). | C | B | B |
| Chunk size=256, Overlap=100 Using SentenceSplitter | the differences between types of radical hysterectomy and their applicable patients are as follows:  - **Type A (Piver-Rutledge) / Type I (Q-M classification):**  - **Difference:** Minimal resection range; involves removal of the uterus and cervix only, without deep dissection of the ureters, cardinal ligaments, or uterosacral ligaments. No vaginal margin resection; bladder is only mobilized downward to the level of the bladder base.  - **Applicable patients:** FIGO stage IA1 cervical cancer (without lymphovascular space invasion), particularly suitable for low-risk cases or patients desiring fertility preservation.  - **Type B (Piver-Rutledge) / Type II (Q-M classification):**  - **Difference:** Moderate resection range; includes uterus, cervix, and approximately the upper 1/4 of the vagina. The ureteral tunnel is dissected but the ureters are not fully mobilized. Cardinal and uterosacral ligaments are divided at the cervical margin; bladder is mobilized downward to below the cervix.  - **Applicable patients:** FIGO stage IA2 cervical cancer (with potential risk of lymph node metastasis), or low-risk IB1 stage (tumor <2 cm, stromal invasion <50%, no radiologic evidence of lymph node metastasis).  - **Type C (Piver-Rutledge) / Type III (Q-M classification):**  - **Difference:** Maximal resection range; includes uterus, cervix, and the upper 1/3 to 1/2 of the vagina. Ureters are fully mobilized; cardinal ligaments and uterosacral ligaments are divided near the pelvic sidewall or sacral attachment. Bladder is mobilized downward to the mid-vaginal level; rectum is mobilized downward to below the cervix.  - **Applicable patients:** FIGO stage IB1, IB2, and IIA1 cervical cancer (standard treatment), especially suitable for larger tumors or those with high-risk factors. The document emphasizes: "Type C radical hysterectomy is the basic surgical procedure for cervical cancer" (similarity 0.499 fragment).  - **Other types:** The document also mentions Type D (more extensive, for advanced disease) and pelvic exenteration (for stage IV or recurrent cancer), but does not detail their differences.  **Summary of applicable patients:** - Type A: Stage IA1 (low-risk). - Type B: Stage IA2 or low-risk IB1. - Type C: Stages IB1, IB2, IIA1 (standard choice).  Surgical approaches may include abdominal, laparoscopic, or robotic methods; however, the document notes that minimally invasive surgery (laparoscopic/robotic) is associated with higher recurrence rates in early-stage cervical cancer and should be used with caution (similarity 0.484 fragment). | A | A | A |
| **Question 73: What are the advantages of IMRT in radiotherapy for cervical cancer?** | | | | |
| Chunk size=512, Overlap=0 Using TokenTextSplitter | IMRT (Intensity-Modulated Radiation Therapy) advantages in cervical cancer radiotherapy are as follows:  - In the [similarity: 0.448] segment, it is explicitly stated: "IMRT, due to reduced doses received by the small bowel, rectum, and bladder, significantly improved 5-year overall survival and progression-free survival (35.4% vs. 21.4%, 26.1% vs. 15.1%, respectively), outperforming conventional concurrent chemoradiotherapy." This indicates that IMRT reduces radiation dose to surrounding organs (such as small intestine, rectum, bladder) through precise tumor targeting.  - The same [similarity: 0.448] segment adds: "Intensity-modulated radiotherapy (IMRT) is an advanced and sophisticated radiation technique that can reduce adverse reactions." This highlights IMRT's advantage in lowering complications (e.g., radiation enteritis, cystitis).  - Summary of advantages:  - Reduced adverse reactions: Through dose optimization, normal tissue is protected, lowering the risk of late complications (e.g., fistula, functional impairment).  - Improved treatment efficacy: May enhance survival rates and progression-free survival, especially applicable to postoperative adjuvant radiotherapy or recurrent disease treatment.  - Applicable scenarios: Commonly used for pelvic radiotherapy, particularly when needing to avoid superimposed surgical complications (e.g., postoperative adjuvant radiotherapy). | A | A | A |
| Chunk size=256, Overlap=100 Using SentenceSplitter | - Advantages:  - Precise target coverage and reduced normal tissue damage: The document states, "It is recommended to use conformal intensity-modulated radiotherapy (IMRT) technology based on image guidance (CT or MR)... For image-guided EBRT, high-dose regions must pay attention to avoiding normal tissues or strictly limiting the radiation dose to normal tissues." (similarity 0.487 fragment). This indicates that IMRT achieves high conformity through image guidance, precisely targets the tumor area while sparing organs such as the bladder and rectum, thereby reducing late complications (e.g., proctitis, cystitis).  - Allows dose escalation and individualized treatment: The document mentions, "Unresectable lymph nodes can be given concurrent boost or sequential boost of 10~15 Gy using highly conformal radiotherapy techniques" (similarity 0.487 fragment). IMRT supports intensified irradiation to high-risk areas (e.g., lymph node metastases) without increasing the dose to surrounding tissues.  - Improves clinical outcomes: In the section on "Radiotherapy (Chemoradiotherapy) for Locally Advanced Cervical Cancer," the document emphasizes that IMRT technology "has promoted the practice of radiotherapy, improved clinical outcomes, and reduced toxicity" (similarity 0.549 fragment).  Therefore, the advantages of IMRT lie in enhancing the precision of radiotherapy, reducing toxic side effects to normal tissues, and supporting individualized dose adjustments. | A | A | A |
| **Question 74: What are the common sites of recurrence in cervical cancer? How is the risk of recurrence monitored?** | | | | |
| Chunk size=512, Overlap=0 Using TokenTextSplitter | common sites of cervical cancer recurrence include: - the pelvis, which is the most frequent site of recurrence (regardless of prior surgery or radiotherapy); - para-aortic lymph nodes, the second most common site; - other sites such as the vaginal vault, parametrial tissue, and distant metastases (e.g., lung, liver, bone), though the pelvis and lymph nodes remain the primary focus.  methods for monitoring recurrence risk: - cytology: perform vaginal vault/cervical cytology (e.g., TCT) at each follow-up visit; however, results after radiotherapy may be difficult to interpret and require histologic confirmation. - histologic confirmation: biopsy is necessary for suspicious recurrences; biopsies should be performed at least 3 months after completion of radiotherapy to avoid false positives. Methods include needle aspiration biopsy (under CT or ultrasound guidance) or endocervical curettage. - imaging: based on symptoms, select chest X-ray, ultrasound, CT, MRI, or PET/CT to evaluate metastases (e.g., supraclavicular lymphadenopathy, para-aortic involvement). - laboratory tests: tumor marker assessment (e.g., SCC, CEA), but must be interpreted in conjunction with clinical findings.  summary: monitoring for recurrence risk relies on multimodal follow-up, with emphasis on early detection of pelvic and lymph node recurrence. | B | B | B |
| Chunk size=256, Overlap=100 Using SentenceSplitter | common sites of cervical cancer recurrence include: - pelvic and central regions: such as cervix, corpus uteri, vagina, bladder, or rectum (e.g., "recurrence sites include pelvis, central areas... pelvic recurrence after cervical cancer radiotherapy" and "surgery may be considered for central recurrence") - distant metastases: including bone, lung, liver, etc. (e.g., "pain management in bone metastasis" and "distant metastases such as lymph nodes, lung, liver, or bone oligometastases")  methods to monitor recurrence risk: - physical examination and cytology: "vaginal apex/cervix cytology should be performed at each follow-up to detect early central recurrence"; "physical exam should assess vulva, vagina, vaginal fornix, and local tumor disappearance or recurrence" - imaging: "imaging such as chest X-ray, ultrasound, CT, creatinine clearance, and liver function tests" is recommended, especially for suspicious sites; "imaging (r): recommend MR, CT, or PET/CT" for evaluating metastases - histopathology and risk factor assessment: recurrence risk correlates with initial treatment factors, e.g., "recurrence relates to lesion diameter and depth of stromal invasion"; tumor >4cm, LVSI positive increase risk  summary: common recurrence sites are pelvic (including central) and distant (e.g., bone, lung); monitoring is achieved through regular cytology, imaging (CT/MR/PET-CT), and clinical assessment. | C | C | C |
| **Question 75: What are the recommended treatment strategies for recurrent cervical cancer? Can surgery, radiotherapy, and chemotherapy be combined?** | | | | |
| Chunk size=512, Overlap=0 Using TokenTextSplitter | yes  - Recommended treatment strategies:  - Central recurrence (e.g., cervix, vagina, bladder/rectum involvement):  - Preferred: surgical treatment (e.g., pelvic exenteration), especially for post-radiotherapy recurrence without distant metastasis.  - Alternative: brachytherapy or individualized external beam radiotherapy (EBRT).  - Source: [Similarity: 0.491] fragment (table): "Central recurrence: surgical treatment (pelvic exenteration)" or "brachytherapy".  - Non-central recurrence (e.g., pelvic sidewall or outside radiotherapy field):  - No prior radiotherapy: surgical resection ± postoperative radiotherapy ± chemotherapy.  - Prior radiotherapy: systemic therapy (chemotherapy) ± individualized radiotherapy (e.g., IMRT or SBRT).  - Source: [Similarity: 0.491] fragment: "Non-central recurrence: systemic therapy ± individualized EBRT".  - Distant metastasis (e.g., lung, liver, bone):  - Preferred: systemic therapy (chemotherapy), combined with palliative radiotherapy for symptom relief.  - For oligometastatic lesions: consider local therapy (e.g., surgery or radiotherapy).  - Source: [Similarity: 0.491] fragment: "Distant metastasis: systemic therapy ± nutritional and supportive care".  - General principles: if initial treatment was surgery, recurrence favors radiotherapy; if initial was radiotherapy, recurrence favors surgery (if feasible). Chemotherapy is commonly used to control micrometastases or as concurrent therapy.  - Can surgery, radiotherapy, and chemotherapy be combined?  - Yes, the document explicitly supports combination use. Examples:  - Surgery combined with postoperative radiotherapy and chemotherapy: for high-risk recurrence patients (e.g., lymph node-positive or positive margins).  - Radiotherapy combined with chemotherapy: as concurrent chemoradiotherapy (CCRT) for local recurrence.  - Specific examples: [Similarity: 0.491] fragment: "surgical resection ± postoperative individualized EBRT ± brachytherapy ± systemic therapy" and [Similarity: 0.519] fragment: "combined treatment with surgery, radiotherapy, and chemotherapy has been advocated by some".  - Benefits of combination: improved local control and reduced recurrence risk, but requires balancing complications (e.g., dual therapy increases adverse effects).  - Summary: strategies include surgery (for central recurrence), radiotherapy (for non-central or postoperative recurrence), and chemotherapy (for distant metastasis); all three can be combined, especially in high-risk or complex cases. Treatment selection must be based on multidisciplinary assessment. | A | A | A |
| Chunk size=256, Overlap=100 Using SentenceSplitter | yes. the following treatment strategies are recommended for recurrent cervical cancer, based on the site of recurrence and prior treatment received. surgery, radiotherapy, and chemotherapy can be combined as appropriate:  - **recommended treatment strategies (based on recurrence site and prior therapy):**  - **prior no radiotherapy or recurrence outside radiotherapy field:**  - level i recommendation: surgical resection (if resectable) ± postoperative individualized external beam radiotherapy (EBRT) ± brachytherapy ± systemic therapy (chemotherapy) (similarity 0.549).  - alternative: individualized EBRT ± brachytherapy ± systemic therapy.  - **prior radiotherapy or recurrence within radiotherapy field:**  - **central recurrence:**  - level i recommendation: surgical treatment (pelvic exenteration)  - level ii recommendation: systemic therapy ± palliative care (similarity 0.549).  - **non-central recurrence:**  - recommended: systemic therapy (chemotherapy) ± individualized EBRT (stereotactic body radiotherapy [SBRT] may be considered) or surgical resection ± intraoperative radiotherapy (IORT) (similarity 0.549).  - **distant metastasis:**  - systemic therapy (chemotherapy) as primary treatment ± local radiotherapy (e.g., for oligometastatic disease) (similarity 0.454).  - document states: "systemic treatment ± local radiotherapy or concurrent chemoradiotherapy for the tumor" (similarity 0.487).  - **can surgery, radiotherapy, and chemotherapy be used in combination?**  - yes, combination use is supported. the document explicitly endorses multimodal therapy:  - e.g., "surgical resection ± postoperative individualized EBRT ± brachytherapy ± systemic therapy" (similarity 0.549), indicating chemotherapy and radiotherapy may follow surgery.  - for recurrence after radiotherapy: "systemic therapy ± individualized EBRT" (similarity 0.549) or "combined chemoradiotherapy" (similarity 0.534).  - the document emphasizes the importance of "comprehensive treatment" in recurrence management, such as "patients with refractory recurrent tumors require individualized, comprehensive treatment approaches" (similarity 0.531).  summary: treatment is individualized based on recurrence site, incorporating surgery, radiotherapy, chemotherapy, or combinations thereof; combined use (e.g., surgery + radiotherapy + chemotherapy) is recommended and feasible, particularly for resectable lesions or symptom control. | A | A | A |
| **Question 76: What are the treatment strategies for metastatic cervical cancer? Are there specific treatments at different metastatic sites?** | | | | |
| Chunk size=512, Overlap=0 Using TokenTextSplitter | the treatment strategies for metastatic cervical cancer include:  - **Systemic therapy**: First-line chemotherapy, typically platinum-based regimens (e.g., cisplatin monotherapy or in combination with paclitaxel, topotecan). For patients with good performance status, palliative chemotherapy or enrollment in clinical trials is recommended (evidence: "for patients with extra-pelvic recurrence or metastasis, radiotherapy or exenteration is not appropriate; chemotherapy or best supportive care is recommended").  - **Radiotherapy**: Used for symptom relief or local disease control, such as palliative radiotherapy for bone metastasis pain. For isolated metastatic lesions (e.g., lymph nodes, lung, liver, or bone), stereotactic body radiotherapy (SBRT) or individualized external beam radiotherapy (EBRT) may be considered to improve survival ("for highly selected patients with isolated distant metastases amenable to local treatment, radiotherapy or ablative therapy may improve survival").  - **Supportive care**: Includes nutritional support, pain management, and palliative care, especially for refractory cases.  **Site-specific treatments for different metastatic locations**:  - **Lymph node metastases** (e.g., para-aortic or supraclavicular): Extended-field radiotherapy (EFRT) combined with concurrent chemotherapy is recommended.  - **Oligometastases in lung, liver, or bone**: Local radiotherapy or surgical resection may be considered, combined with systemic therapy.  - **Central recurrence (e.g., pelvic recurrence)**: If no prior radiotherapy, surgery (e.g., pelvic exenteration) or radiotherapy may be considered; if recurrence occurs within a previous radiotherapy field, systemic therapy is the mainstay.  **Summary**: Treatment strategy depends on metastatic site, extent, and prior therapy. Systemic therapy is the foundation; local therapy is used for oligometastatic disease to prolong survival. | A | A | A |
| Chunk size=256, Overlap=100 Using SentenceSplitter | - **Treatment Strategies**:  - For patients with pelvic recurrence or extra-pelvic metastasis who are not suitable for radiotherapy or pelvic exenteration, chemotherapy or best supportive care (such as pain management and symptom relief) is recommended. Chemotherapy can alleviate pain and other symptoms, but responses are typically short-lived with limited survival benefit.  - For carefully selected patients with isolated distant metastases (e.g., oligometastatic disease in lymph nodes, lung, liver, or bone), local therapies such as radiotherapy or ablation may be used and may improve survival. Systemic therapy (e.g., chemotherapy) may be considered after local treatment.  - In patients with positive para-aortic or supraclavicular lymph nodes, concurrent chemoradiotherapy (CCRT) may yield better response rates, overall survival, and disease-free survival compared with systemic chemotherapy alone.  - Patients with refractory metastatic tumors require individualized comprehensive management, including end-of-life care, pain consultation, and emotional and spiritual support.  - For patients who fail first-line systemic therapy, prognosis is poor; they may receive further systemic therapy or best supportive care, and participation in clinical trials is encouraged.  - **Site-Specific Treatments for Different Metastatic Locations**:  - **Lymph node metastases (e.g., para-aortic or supraclavicular)**: Concurrent chemoradiotherapy (CCRT) is recommended and may be superior to chemotherapy alone.  - **Bone metastases**: Radiotherapy is commonly used for palliative pain relief.  - **Isolated oligometastases in lung, liver, etc.**: May benefit from local radiotherapy or ablation, followed by combination systemic therapy.  - **Extensive extra-pelvic metastasis**: Systemic chemotherapy or best supportive care is the mainstay; local radiotherapy or surgery is not recommended.  - **Evidence Basis**: The document repeatedly references systemic therapy for recurrent or metastatic cervical cancer (e.g., segments with similarity scores 0.624, 0.587, 0.553), emphasizing that the choice between chemotherapy and local therapy depends on metastatic site and individual patient factors. | D | D | D |
| **Question 77: What are the treatment strategies for patients with cervical cancer during pregnancy? How does the treatment differ in early, intermediate, and advanced stages of pregnancy?** | | | | |
| Chunk size=512, Overlap=0 Using TokenTextSplitter | treatment strategies for cervical cancer during pregnancy:  overall treatment strategy: cervical cancer in pregnancy requires multidisciplinary team evaluation, prioritizing maternal prognosis and fetal safety. treatment options include surgery, radiotherapy, or delayed treatment, depending on tumor stage and gestational age. - treatment differences by gestational stage:  - first trimester (≤12 weeks): termination of pregnancy is recommended, followed immediately by standard treatment (e.g., surgery or chemoradiation) to avoid treatment delay.  - second trimester (13–28 weeks): delayed treatment may be considered until fetal viability (approximately after 24 weeks), with close tumor monitoring; if rapid tumor progression occurs, surgery (e.g., trachelectomy) or chemotherapy (avoiding radiotherapy) may be performed. definitive treatment is completed after delivery.  - third trimester (>28 weeks): treatment is preferably delayed until delivery (often planned as preterm birth), followed immediately by radical treatment postpartum (e.g., hysterectomy or chemoradiation). radiotherapy must be avoided during pregnancy. | B | C | C |
| Chunk size=256, Overlap=100 Using SentenceSplitter | treatment strategies for cervical cancer during pregnancy:  - overall principle: management of cervical cancer during pregnancy follows the same principles as in non-pregnant patients but requires a multidisciplinary team to balance maternal and fetal health. treatment depends on gestational stage, tumor stage, and patient preference.  - stage-specific treatment strategies:  - first trimester (≤20 weeks):  - upon diagnosis of cervical cancer, pregnancy should be terminated promptly (via therapeutic abortion or dilation and curettage), followed by initiation of cervical cancer treatment (surgery or chemoradiation).  - for early-stage cancer (e.g., IB, IIA), radical hysterectomy with pelvic lymphadenectomy is preferred if no surgical contraindications exist, with ovarian preservation.  - radiation therapy often leads to spontaneous abortion, so pregnancy must be terminated before radiotherapy.   - second trimester (>20 weeks to before late pregnancy):  - deferring radical treatment may be considered to increase fetal viability, especially for IA2–IB2 stage patients. prognosis does not appear worse compared to non-pregnant patients when treatment is delayed.  - during ongoing pregnancy, selected patients may undergo surgery (e.g., radical trachelectomy) or chemotherapy (neoadjuvant chemotherapy).  - for locally advanced tumors, classical cesarean section may be performed to terminate pregnancy, followed by 2–3 cycles of neoadjuvant chemotherapy, then radical surgery.   - third trimester (≥38 weeks):  - perform classical cesarean section to terminate pregnancy, then initiate cervical cancer treatment (radical hysterectomy or chemoradiation) as soon as possible postpartum.  - for patients desiring fertility preservation, radical surgery may be performed concurrently with cesarean section; for those without fertility desire, treatment begins immediately.  - external beam radiotherapy should be initiated within 10 days postpartum, followed by brachytherapy after uterine involution.  - evidence basis: the document details management of cervical cancer during pregnancy (e.g., [similarity: 0.561], [similarity: 0.519], [similarity: 0.535] segments), emphasizing the impact of stage and gestational timing on decision-making. | A | B | A |
| **Question 78: Are patients with cervical cancer in pregnancy suitable for surgery? At what stage of pregnancy should surgery be considered?** | | | | |
| Chunk size=512, Overlap=0 Using TokenTextSplitter | yes, surgical treatment is suitable for pregnant patients with cervical cancer, particularly for those with early-stage disease (IB, IIA) without surgical contraindications. surgery can preserve ovarian and vaginal function, which is especially important for young patients.  surgical timing by gestational stage: - early pregnancy (before 20 weeks): immediate surgery is appropriate. this may involve terminating the pregnancy (via abortion or cesarean delivery) followed by radical surgery, or performing radical surgery with the fetus in utero (after risk assessment). - mid and late pregnancy (after 20 weeks): delayed surgery until approximately 38 weeks is recommended, performed concurrently with cesarean section. for example, a classical cesarean section followed immediately by radical hysterectomy to reduce tumor dissemination risk. - exception: for large or high-risk tumors, neoadjuvant chemotherapy may be given before surgery.  note: surgery must be performed at a specialized center; vaginal delivery should be avoided to prevent hemorrhage and tumor spread; pelvic congestion during pregnancy increases intraoperative bleeding risk, requiring careful technique.  summary: surgical treatment is feasible, prioritized in early pregnancy or late pregnancy (combined with cesarean section); mid-pregnancy cases may be delayed with close monitoring. | A | A | A |
| Chunk size=256, Overlap=100 Using SentenceSplitter | yes, surgical treatment is suitable for pregnant patients with cervical cancer, particularly for early-stage cases (such as IA2, IB), which can preserve ovarian function and fertility. Surgical options include radical hysterectomy, pelvic lymphadenectomy, or radical trachelectomy (fertility-preserving).  consideration of surgical timing: - early pregnancy (≤20 weeks): terminate pregnancy and proceed immediately with surgery (e.g., radical hysterectomy). for IA2 or IB stage, tumor diameter <2cm, and no pelvic or lymph node metastasis, radical trachelectomy (uterus-preserving) may be performed. - mid-pregnancy (>20 weeks): surgery may be deferred until late pregnancy, or performed during pregnancy (e.g., radical trachelectomy) provided laparoscopic lymph node biopsy confirms no metastasis. - late pregnancy (≥38 weeks): perform cesarean section to terminate pregnancy, followed by immediate surgery (e.g., radical hysterectomy) as soon as possible.  notes: surgery requires assessment of patient tolerance, tumor stage, and local medical resources. postoperative recurrence after radiotherapy or advanced-stage cases carry high surgical risk and require caution.  basis: the document explicitly states the application of surgery during pregnancy (e.g., [similarity: 0.519], [similarity: 0.535] segments) and specifies applicable stages and conditions. | A | A | A |
| **Question 79: What is the radiotherapy strategy for patients with locally advanced cervical cancer? When is a combination of chemotherapy recommended?** | | | | |
| Chunk size=512, Overlap=0 Using TokenTextSplitter | 79. What is the radiotherapy strategy for patients with locally advanced cervical cancer? When is combined chemotherapy recommended?  Based on the document content: - Radiotherapy strategy: For locally advanced cervical cancer (e.g., FIGO IB3, IIA2 and above), radical radiotherapy is the mainstay, consisting of external beam radiotherapy (EBRT) and intracavitary brachytherapy (ICRT). The standard regimen is:  - EBRT: Covers the entire pelvis, with a dose of approximately 45–50 Gy, used to shrink the tumor and cover nodal regions ([similarity: 0.522] segment: "Standard EBRT should cover the uterine body, cervix, adnexal structures, parametria, and pelvic lymph nodes using 2 or 4 field techniques").  - ICRT: Used to boost local dose, with point A or high-risk CTV reaching 80–90 Gy (equivalent dose). Recommended after EBRT to optimize tumor control.  - Technical application: Image-guided radiotherapy (IGRT) or intensity-modulated radiotherapy (IMRT) is recommended to reduce normal tissue injury, especially when the tumor is large or shows poor regression. - When combined chemotherapy is recommended:  - Concurrent chemoradiotherapy (CCRT): Recommended for FIGO IB3 and above (e.g., IIB–IVA), based on cisplatin (weekly 40 mg/m²), which significantly reduces recurrence risk and mortality (evidence level I). CCRT is the standard treatment for locally advanced cervical cancer, improving survival by 10–15% over radiotherapy alone.  - Specific indications: Mandatory for tumor diameter ≥4 cm, positive lymph nodes, or high-risk features (e.g., adenocarcinoma, poor differentiation). In resource-limited settings, neoadjuvant chemotherapy (NACT) may be considered if radiotherapy is unavailable, though efficacy is controversial ([similarity: 0.522] segment).  - Chemotherapy regimen: Weekly cisplatin is preferred; carboplatin may be used if cisplatin is not tolerated. Avoid radiotherapy alone unless contraindications to chemotherapy exist. - Summary: Radiotherapy centers on EBRT + ICRT; chemotherapy is recommended concurrently for IB3 and above to enhance efficacy. | A | A | A |
| Chunk size=256, Overlap=100 Using SentenceSplitter | the radiotherapy strategy for patients with locally advanced cervical cancer is: - the standard regimen is concurrent chemoradiotherapy (CCRT), comprising external beam radiotherapy (EBRT) and intracavitary brachytherapy (e.g., ICRT). - the EBRT target volume covers the pelvis ± para-aortic region, with a dose typically of 45–50 Gy. Unresectable lymph nodes may receive a boost of 10–15 Gy. - brachytherapy is a critical component, using uterine tandem and vaginal applicators; point A or high-risk CTV dose is 20–35 Gy (in 4–6 fractions). for large or asymmetric tumors, interstitial brachytherapy (with image guidance such as MRI) is recommended. - radiotherapy should be completed within 8 weeks to avoid increased failure rates due to prolonged treatment time.  timing for recommending concurrent chemotherapy: - for locally advanced cervical cancer (e.g., IB3, IIA2, IIB and above), CCRT is the standard treatment; concurrent platinum-based chemotherapy (e.g., weekly cisplatin 40 mg/m²) is recommended. - when high-risk factors are present (e.g., positive lymph nodes, tumor diameter >4 cm), concurrent chemotherapy must be added to reduce recurrence and mortality risk. - chemotherapy regimen: weekly cisplatin is preferred; carboplatin may be used for patients intolerant to cisplatin. neoadjuvant chemotherapy before radiotherapy is not recommended except in regions with limited radiotherapy resources or in clinical trials.  basis: the document repeatedly emphasizes CCRT as the standard for locally advanced cervical cancer (as in [similarity: 0.596], [similarity: 0.548], [similarity: 0.526] segments) and specifies the indications for chemotherapy. | A | B | A |
| **Question 80: When is image-guided brachytherapy (ICRT) necessary and how is it different from conventional radiotherapy?** | | | | |
| Chunk size=512, Overlap=0 Using TokenTextSplitter | - When ICRT is needed:  - Large or asymmetric tumors: When the local tumor volume is large and asymmetric, ICRT (especially with MRI guidance) enables more precise delineation of residual tumor and allows higher target dose.  - Residual or recurrent tumor: MRI is recommended before or during brachytherapy to optimize dose distribution.  - Need for normal tissue protection: When strict dose limits for rectum, bladder, or sigmoid colon are required (e.g., rectal D2cc ≤65–75 Gy), ICRT reduces complications.  - Primary inoperable patients: For all cervical cancer patients unsuitable for surgery, ICRT is a key component of radical radiotherapy. - Differences from conventional radiotherapy:  - Precision and guidance: ICRT uses imaging (e.g., MRI) for real-time guidance to ensure dose accurately covers high-risk CTV; conventional radiotherapy (e.g., EBRT) relies on external beam irradiation with lower precision and higher risk of normal tissue damage.  - Dose and fractionation: ICRT prescribes a dose of 80–85 Gy (equivalent dose) to point A or HR-CTV D90, delivered in 4–6 fractions; conventional EBRT uses lower doses (~45–50 Gy) given in multiple sessions.  - Technique and application: ICRT can employ interstitial implantation techniques (e.g., tandem and ovoids or vaginal applicators) for irregular tumors; conventional radiotherapy is typically external beam with broad coverage but weaker local control.  - Indications: ICRT is specific for intracavitary or brachytherapy applications, suitable for central tumors; conventional radiotherapy is used for whole-pelvis irradiation. - Summary: ICRT is required for complex tumors or when high precision is needed; it is more accurate and individualized than conventional radiotherapy, with reduced complications. | A | B | B |
| Chunk size=256, Overlap=100 Using SentenceSplitter | when is image-guided brachytherapy (ICBT) needed, and how does it differ from conventional radiotherapy?  based on the document content: - when ICBT is needed:  - for patients with early-stage cervical cancer unsuitable for surgery (e.g., FIGO IA or IB1 stage), especially those with surgical or anesthetic contraindications, ICBT can serve as an alternative.  - when the tumor is small (<1 cm) or the patient has relative contraindications to external beam radiotherapy (EBRT) (e.g., comorbidities), single-modality ICBT is recommended.  - for patients with large, asymmetric local tumors or insufficient tumor regression after radiotherapy, interstitial brachytherapy (requiring image guidance such as MRI or ultrasound) is needed to precisely delineate the target volume and avoid damage to normal tissues (e.g., bladder, rectum). - differences from conventional radiotherapy:  - ICBT (intracavitary brachytherapy): a type of brachytherapy where radioactive sources (e.g., radium or afterloading devices) are placed directly in the uterine cavity or vagina, delivering a high localized dose (e.g., 60–65 Gy to point A). its advantage is reduced damage to surrounding normal tissues and preservation of organ function; it is commonly used for early-stage or microinvasive cancer.  - conventional radiotherapy (EBRT): administered via external devices (e.g., linear accelerators) for pelvic irradiation, covering a broad area but potentially causing more late complications (e.g., rectal or bladder reactions). EBRT is typically combined with ICBT for intermediate-to-advanced stage cases.  - key distinction: ICBT offers greater precision and higher local dose, requiring image guidance (e.g., MRI) to optimize target delineation; conventional EBRT provides wide-field irradiation, suitable for large-volume tumors. the document recommends ICBT for specific early-stage cases or as a supplement to EBRT. - evidence: the document details ICBT application scenarios and advantages (e.g., [similarity: 0.616], [similarity: 0.548] segments) and compares different radiotherapy modalities. | B | B | B |
| **Question 81: What are the methods for monitoring recurrence after treatment of cervical cancer? Is routine imaging recommended.** | | | | |
| Chunk size=512, Overlap=0 Using TokenTextSplitter | - Monitoring methods:   According to the context, recurrence monitoring includes:   - Physical examination: Vaginal vault/cervical cytology is performed at each follow-up visit, which can detect central recurrence early (similarity 0.570).   - Pathological examination: Histological confirmation is necessary, especially for patients after radiotherapy. Biopsy should be performed 3 months after completion of radiotherapy (similarity 0.570).   - Imaging examinations:   - Selective performance of chest X-ray, ultrasound, CT, MRI, etc. (similarity 0.570).   - When metastasis is suspected (e.g., supraclavicular lymphadenopathy, parametrial recurrence, para-aortic metastasis), needle aspiration biopsy may be performed under imaging guidance (similarity 0.570).   - Tumor markers: Such as SCC, CEA, etc., but their monitoring value is limited (similarity 0.482).  - Recommendation for routine imaging:   Imaging should be used selectively based on symptoms, signs, and suspicious sites (similarity 0.570), and is not recommended as routine for all patients. | A | A | A |
| Chunk size=256, Overlap=100 Using SentenceSplitter | no  Methods for monitoring recurrence after cervical cancer treatment include: - 1. Physical examination: Includes whole-body superficial lymph node examination, abdominal palpation (to detect masses or hepatosplenomegaly), and pelvic examination (observing vulva, vagina, vaginal vault, local cervical tumor, and noting recurrent nodules). - 2. Cytological examination: Vaginal apex/cervical cytology should be performed at each follow-up to detect early central recurrence (though assessment is difficult after radiotherapy). - 3. Cervical canal curettage: Used when cervical canal recurrence is suspected. - 4. Ancillary examinations: Selectively perform chest X-ray, ultrasound, CT, creatinine clearance, and liver function tests based on symptoms, signs, and suspected recurrence sites.  Regarding routine imaging: - The document explicitly states that imaging examinations (such as ultrasound, CT, MRI) are performed "selectively" and are not routinely recommended. Reasons include: application of imaging methods is limited by local medical resources and patient economic conditions; routine complete blood counts or biochemical tests are ineffective, but imaging is mainly used for specific situations (e.g., monitoring potential lung lesions). Therefore, guidelines do not recommend routine imaging; instead, it should be used selectively based on individual symptoms and signs. | A | A | A |
| **Question 82: What are the main goals of palliative care? In patients with metastatic cervical cancer, how can palliative care be combined with radiotherapy and chemotherapy?** | | | | |
| Chunk size=512, Overlap=0 Using TokenTextSplitter | - Primary goal:   Palliative care aims to relieve symptoms (such as pain, vaginal bleeding/discharge) and improve quality of life, rather than cure the disease (similarity 0.482).  - Integration with radiotherapy/chemotherapy:   - Radiotherapy: Used to control local symptoms (e.g., bone metastasis pain relief, vaginal bleeding), short-course irradiation (e.g., 20 Gy in 4–5 fractions) can provide rapid symptom relief (similarity 0.482).   - Chemotherapy: Systemic treatment may alleviate systemic symptoms, but has low response rates and short duration of effect (similarity 0.451).   - Combined strategy:   - For metastatic patients, systemic therapy (chemotherapy) is the mainstay, combined with individualized radiotherapy to relieve local symptoms (similarity 0.451).   - For refractory patients, supportive care (nutrition, pain management) must be integrated (similarity 0.451).   No more specific integration protocols are provided in the context. | A | A | A |
| Chunk size=256, Overlap=100 Using SentenceSplitter | the main goal of palliative care is to control symptoms to maintain life dignity and quality of life, especially for patients with advanced or metastatic disease. common symptoms include pain, ureteral obstruction, bleeding, foul-smelling vaginal discharge, lymphedema, and fistulas.  in metastatic cervical cancer, integrating palliative care with radiotherapy and chemotherapy: - 1. integration with radiotherapy: short-course radiotherapy can be used to relieve symptoms (e.g., pain from bone metastases), but dose planning must be cautious to avoid complications. for patients unsuitable for surgery, radiotherapy serves as a palliative modality to control local recurrence or alleviate symptoms such as bleeding or compression. - 2. integration with chemotherapy: chemotherapy (e.g., cisplatin- or carboplatin-based regimens) is recommended for symptom relief, particularly when the patient has a good performance status (ECOG 0–2). chemotherapy may provide temporary relief of pain and other symptoms, though the duration of effect is short and survival benefit is limited. it is often combined with best supportive care (e.g., oral morphine for pain control). - 3. comprehensive management: individualized plans are key, including psychosocial support, pain management (stepwise use of morphine), and end-of-life care. for patients with extra-pelvic recurrence or metastasis not suitable for radiotherapy or surgery, chemotherapy or supportive care is preferred; refractory cases may consider clinical trials. | A | A | A |
| **Question 83: For patients with FIGO stage IB3 and IIA2 disease, why do guidelines prefer to recommend concurrent chemoradiotherapy (CCRT) over surgery as the primary treatment?** | | | | |
| Chunk size=512, Overlap=0 Using TokenTextSplitter | - Reason:   - High adjuvant therapy requirement: 80% of patients undergoing surgery require adjuvant radiotherapy or CCRT postoperatively, increasing the risk of "dual treatment" (similarity 0.478).   - Complication risk: Surgery plus radiotherapy significantly increases the risk of severe complications (e.g., bowel, urinary tract injury), impairing quality of life (similarity 0.478).   - Survival benefit: CCRT improves survival rates by 10%–15% compared with radiotherapy alone and reduces local/distant recurrence (similarity 0.478).   - Resource burden: The dual-treatment model leads to unnecessary consumption of surgical and radiotherapy resources (similarity 0.478).   Therefore, CCRT is designated as the standard treatment for IB3/IIA2 stages (similarity 0.478). | A | A | A |
| Chunk size=256, Overlap=100 Using SentenceSplitter | For patients with FIGO IB3 and IIA2 stages, why do guidelines preferentially recommend concurrent chemoradiotherapy (CCRT) over surgery as the primary treatment?  The document repeatedly emphasizes CCRT as the preferred treatment for IB3 and IIA2 stages:  - Reasons:   1. High postoperative adjuvant therapy requirement: Approximately 80% of patients require adjuvant radiotherapy (PORT) or CCRT after surgery, leading to "dual therapy" (surgery plus radiotherapy), which increases complication risks (e.g., urinary tract injury, fistula, bladder dysfunction) and significantly impairs quality of life.   2. Resource burden: The dual therapy model consumes unnecessary surgical and radiotherapy resources, especially in resource-limited settings.   3. Survival advantage: CCRT (including external beam radiation and intracavitary brachytherapy) improves 5-year survival rates by 10%~15% compared with radiotherapy alone, based on evidence from large randomized trials (e.g., U.S. National Cancer Institute 1999 recommendation).   4. Tumor characteristics: IB3/IIA2 stage tumors are larger and often associated with high-risk factors (e.g., lymph node positivity, parametrial involvement), increasing recurrence risk; CCRT as a single modality provides more effective local and micrometastatic disease control.   Therefore, guidelines recommend CCRT as the standard approach, reserving surgery as an alternative only in regions with scarce radiotherapy resources. | B | A | A |
| **Question 84: For a patient with FIGO stage IB3 cervical cancer, what is the recommended primary treatment modality? Why is a "dual-modality treatment" approach, typically involving surgery followed by adjuvant radiotherapy, generally not recommended?** | | | | |
| Chunk size=512, Overlap=0 Using TokenTextSplitter | - Preferred treatment:   Radical radiotherapy (external beam radiotherapy + vaginal brachytherapy) ± platinum-based concurrent chemotherapy (similarity 0.534).  - Reasons why "dual therapy" (surgery followed by adjuvant radiotherapy) is not recommended:   - Risk of complications: Postoperative radiotherapy increases severe complications (e.g., bowel injury, bladder dysfunction), with incidence rates up to 10% (similarity 0.499).   - Low resource efficiency: Most patients still require radiotherapy after surgery, making dual therapy a waste of medical resources (similarity 0.478).   The context explicitly emphasizes that concurrent chemoradiotherapy (CCRT) is the standard treatment for IB3 stage, with surgery reserved only as an alternative in regions lacking radiotherapy resources (similarity 0.534). | B | B | B |
| Chunk size=256, Overlap=100 Using SentenceSplitter | the preferred treatment option: Guidelines recommend concurrent chemoradiotherapy (CCRT) as the first-line treatment for IB3, including external beam radiation and intracavitary brachytherapy.  - Reasons why the "dual therapy" approach (surgery followed by adjuvant radiotherapy) is generally not recommended:   1. High risk of complications: Surgery plus postoperative adjuvant radiotherapy increases the incidence of severe complications, such as urinary tract injuries (ureterovaginal fistula or vesicovaginal fistula rates of 2%~7%), bladder dysfunction, and infections, which impair quality of life.   2. High recurrence risk and resource waste: Approximately 80% of IB3 patients require adjuvant radiotherapy after surgery; the dual therapy model unnecessarily increases medical resource burden without significantly improving survival rates (the document notes that postoperative radiotherapy reduces local recurrence but shows no statistically significant difference in overall survival).   3. Insufficient survival benefit: CCRT as a single modality has been proven superior to the combined surgery-plus-radiotherapy approach, offering better local control and survival rates (a 10%~15% survival advantage), whereas dual therapy may increase the risk of distant metastasis.   The document emphasizes that in regions with adequate radiotherapy resources, dual therapy should be avoided to optimize patient outcomes. | A | A | A |
| **Question 85: What are the core conclusions of the LACC trial, which significantly influenced the choice of surgical approach for early-stage cervical cancer? For young patients who wish to preserve ovarian and sexual function, what are the unique advantages of surgical treatment compared to radiotherapy?** | | | | |
| Chunk size=512, Overlap=0 Using TokenTextSplitter | the results of the LACC trial have had a significant impact on the choice of surgical approach for early-stage cervical cancer. the core conclusion of the LACC trial is as follows:  comparing open surgery with laparoscopic/robotic surgery for early cervical cancer (stage IB1), the results showed:  - lower survival rates and higher recurrence rates in the minimally invasive surgery group compared to open surgery (similarity 0.591).  - no difference in intraoperative complications, but worse long-term outcomes with minimally invasive surgery (similarity 0.591).   unique advantages of surgical treatment (for young patients requiring ovarian and sexual function preservation):  - preservation of ovarian function: surgery allows for ovarian transposition outside the radiation field, avoiding radiation-induced ovarian failure (similarity 0.591).  - preservation of sexual function: surgery maintains vaginal elasticity and lubrication, reducing radiation-induced vaginal atrophy (similarity 0.545).  - accurate pathological staging: provides histological evidence to guide individualized adjuvant therapy (similarity 0.591).  therefore, surgery remains the preferred option for young patients requiring functional preservation (similarity 0.591). | A | A | A |
| Chunk size=256, Overlap=100 Using SentenceSplitter | the results of the LACC trial have significantly influenced the choice of surgical approach for early-stage cervical cancer. what is the core conclusion of the LACC trial? for young patients requiring preservation of ovarian and sexual function, what unique advantages does surgical treatment offer over radiotherapy?  core conclusion of the LACC trial: the LACC trial (Laparoscopic Approach to Cervical Cancer) compared open surgery with minimally invasive surgery (laparoscopic or robotic) for early cervical cancer. the results showed that minimally invasive surgery was associated with lower survival rates and higher recurrence rates, while intraoperative complications did not differ significantly. the conclusion is that minimally invasive surgery carries a higher risk of recurrence than open surgery and requires further research for confirmation. - advantages of surgical treatment (for young patients requiring preservation of ovarian and sexual function):  1. preservation of ovarian function: surgery allows direct preservation of the ovaries, avoiding ovarian failure caused by radiotherapy, thus eliminating the need for hormone replacement therapy, which is especially important for patients under 45 years of age.  2. preservation of vaginal function: surgery maintains vaginal elasticity and lubricating secretions, preventing radiotherapy-induced vaginal atrophy, narrowing, or dryness, thereby improving sexual quality of life.  3. individualized treatment: surgery enables exploration of the pelvic and abdominal cavity, providing accurate pathological staging to guide decisions on postoperative adjuvant therapy (e.g., whether chemotherapy is needed) and to remove radioresistant foci, reducing local recurrence risk.  4. avoidance of radiotherapy complications: surgery reduces the risk of late rectal and bladder radiation injuries, such as painful fistulas or functional impairment.  the document states that surgery is the preferred option for young patients requiring preservation of ovarian and sexual function, but attention must be paid to the LACC trial’s warning: open surgery should be prioritized over minimally invasive approaches. | A | A | A |
| **Question 86: When performing definitive radiotherapy for locally advanced cervical cancer, within what timeframe should the entire course of treatment be completed to achieve optimal efficacy? What are the consequences if the treatment duration is excessively prolonged?** | | | | |
| Chunk size=512, Overlap=0 Using TokenTextSplitter | during radical radiotherapy for locally advanced cervical cancer, the entire treatment course should be completed within 7–8 weeks (approximately 56 days) to achieve optimal efficacy.  - consequences of prolonged treatment time: if the treatment duration exceeds 8 weeks, the risk of tumor cell repopulation increases, leading to reduced local control rates, increased risk of recurrence, and potentially decreased overall survival. | B | A | A |
| Chunk size=256, Overlap=100 Using SentenceSplitter | Answer: According to the context (similarity 0.508), radical radiotherapy (including external beam radiotherapy [EBRT] and brachytherapy) should be completed within 8 weeks. If the treatment duration is too long (exceeding 9–10 weeks), it will result in a higher pelvic treatment failure rate (i.e., reduced tumor control efficacy).  - Basis: The text explicitly states: "Retrospective analysis shows that patients whose radiotherapy time exceeds $9 \sim 10$ weeks have a higher pelvic treatment failure rate compared to those who complete radiotherapy in 6–7 weeks. Therefore, it is particularly important to complete the radiotherapy regimen within the specified time, and it is recommended to finish EBRT and brachytherapy within 8 weeks." | A | A | A |
| **Question 87: When delivering pelvic external beam radiotherapy (EBRT), how are the superior, inferior, and lateral borders of the "AP-PA fields" (anteroposterior-posteroanterior fields) defined according to the guidelines?** | | | | |
| Chunk size=512, Overlap=0 Using TokenTextSplitter | boundary setting: according to the CSCO cervical cancer clinical practice guidelines 2023, the boundaries of the AP-PA radiation field are set as follows:  - superior border: at the level of L4-L5 vertebral bodies.  - inferior border: 2 cm below the obturator foramen or 3 cm below the inferior edge of the tumor, whichever is lower (i.e., the more conservative value is chosen to ensure tumor coverage while sparing normal tissues).  - lateral borders: 1.5–2 cm lateral to the true bony pelvis boundaries (i.e., extending outward from the pelvic sidewalls by 1.5–2 cm to cover potential spread regions). - this configuration aims to adequately cover the primary tumor and regional lymph nodes while minimizing radiation-induced injury to normal tissues. | A | B | A |
| Chunk size=256, Overlap=100 Using SentenceSplitter | no description of the specific boundaries (superior, inferior, lateral) for the "AP-PA irradiation field" is found in the knowledge base. The documents mention irradiation coverage (e.g., "the irradiation range should include the most common recurrence sites" and "when there is metastasis to high pelvic common iliac and para-aortic lymph nodes, the radiation field may be extended superiorly to the T12 level"), but do not explicitly detail the boundaries for the anterior-posterior opposed fields. - Basis: surrounding context (e.g., similarity 0.575, 0.508) only generally describes target volumes (such as pelvis ± para-aortic region) without providing boundary parameters for the AP-PA fields. | D | D | D |
| **Question 88: According to the guidelines, what postoperative pathological factors are considered "high-risk factors" following a radical hysterectomy? For patients with these high-risk factors, what type of adjuvant therapy should be administered?** | | | | |
| Chunk size=512, Overlap=0 Using TokenTextSplitter | high-risk pathological factors after radical hysterectomy include: positive lymph nodes, positive surgical margins, and parametrial infiltration. The presence of any one of these high-risk factors warrants further evaluation.  For patients with these high-risk factors, adjuvant treatment is recommended as follows: pelvic external beam radiotherapy plus concurrent platinum-based chemotherapy (concurrent chemoradiotherapy), with possible addition of vaginal brachytherapy. The guideline emphasizes that in the absence of para-aortic lymph node involvement or distant metastasis, this regimen should be administered (evidence level I). Concurrent chemotherapy typically uses single-agent cisplatin (e.g., cisplatin 40 mg/m² weekly), with carboplatin as an alternative for patients intolerant to cisplatin. | B | B | B |
| Chunk size=256, Overlap=100 Using SentenceSplitter | - High-risk factors: Include positive surgical margins, lymph node metastasis, or parametrial spread.  - Adjuvant therapy: Should receive postoperative radiotherapy (PORT), and may be combined with concurrent chemotherapy (e.g., 5-FU, DDP).  - Evidence: The context (similarity 0.539) explicitly states: "High-risk factors include positive surgical margins, lymph node metastasis, or parametrial spread; PORT should be administered, and GOG109 demonstrated an overall survival benefit." Another excerpt (similarity 0.522) adds: "For patients with stage I–II cervical cancer after radical surgery with pelvic metastasis, parametrial infiltration, or positive margins, concurrent chemoradiation should be implemented." | A | A | A |
| **Question 89: For a 40-year-old patient with early-stage cervical cancer (e.g., stage IB1) and no contraindications to surgery, why is surgery typically recommended as the preferred treatment, given that its efficacy is comparable to that of definitive radiotherapy?** | | | | |
| Chunk size=512, Overlap=0 Using TokenTextSplitter | for a 40-year-old patient with early-stage cervical cancer (e.g., IB1) and no surgical contraindications, why is surgery typically prioritized over definitive radiotherapy when both treatments offer comparable efficacy?  reasons for prioritizing surgery:  - preservation of ovarian function: surgery avoids radiotherapy-induced premature ovarian failure, thereby maintaining endocrine function and fertility potential.  - reduced long-term complications: compared to radiotherapy, surgery lowers the risk of long-term side effects such as vaginal stenosis, bladder or rectal injury, and improves quality of life.  - individualized treatment: surgery enables more accurate pathological staging, facilitating subsequent individualized adjuvant therapy decisions (e.g., lymph node status assessment). - although survival rates are similar between surgery and radiotherapy, surgery provides better functional preservation and quality of life in younger patients. | A | B | B |
| Chunk size=256, Overlap=100 Using SentenceSplitter | for a 40-year-old patient with early-stage cervical cancer (e.g., IB1) and no surgical contraindications, surgery is typically prioritized over definitive radiotherapy despite comparable efficacy because:  - surgery preserves ovarian function and vaginal function, avoiding long-term complications of radiotherapy such as ovarian failure, vaginal atrophy, or stenosis, which is especially important in younger patients (<45 years old). - additionally, surgery circumvents issues of radioresistance and allows intraoperative exploration to adjust treatment plans.  - Evidence:  - Context (similarity 0.600): "(1) Ovarian function can be preserved without hormone replacement therapy. A more functional vagina is retained, with its elasticity and lubricating secretion often maintained, avoiding vaginal shrinkage and atrophy. This is especially important for patients under 45 years old."  - Another excerpt (similarity 0.525): "For patients with IB or IIA stage disease, surgery should be the first consideration if: ① the patient is under 45 years old."  - Similarity 0.514 adds: "Because radiotherapy may lead to related complications, for premenopausal patients, especially those under 45 years old without surgical contraindications, surgery may be chosen." | C | A | A |
| **Question 90: During surgery for cervical cancer, what specific lymph node regions are included in the standard scope of a pelvic lymphadenectomy?** | | | | |
| Chunk size=512, Overlap=0 Using TokenTextSplitter | the standard resection range for pelvic lymphadenectomy includes the following lymph node regions:  - Common iliac lymph nodes  - External iliac lymph nodes  - Internal iliac lymph nodes  - Obturator lymph nodes  - Presacral lymph nodes (resected selectively based on tumor location) - This range aims to systematically remove pelvic lymph nodes for accurate staging and reduction of metastatic risk. | C | C | C |
| Chunk size=256, Overlap=100 Using SentenceSplitter | the standard resection range for pelvic lymphadenectomy includes the common iliac lymph nodes, external iliac lymph nodes, internal iliac lymph nodes, and obturator lymph nodes. Some descriptions also mention that it may include parametrial lymph nodes (sources: [similarity: 0.522] and [similarity: 0.472]). | B | C | C |
| **Question 91: For the diagnosis of stage IA cervical cancer, why is a diagnosis based solely on cervical biopsy histopathology considered insufficient?** | | | | |
| Chunk size=512, Overlap=0 Using TokenTextSplitter | b IA stage cervical cancer must be diagnosed based on the pathology of a cervical conization specimen; it cannot be diagnosed solely by the histopathology of a cervical biopsy.  The reason is that a cervical biopsy may not accurately assess the depth of stromal invasion, while IA stage involves microinvasive carcinoma (such as IA1 and IA2). A comprehensive tissue sample is required to confirm the extent of invasion. Specifically, a cervical biopsy may miss deeper invasion or small lesions, leading to incorrect staging. Therefore, a definitive diagnosis of IA stage requires cervical conization to obtain complete tissue for pathological examination, ensuring accurate assessment of invasion depth and extent. | A | A | A |
| Chunk size=256, Overlap=100 Using SentenceSplitter | For the diagnosis of stage IA cervical cancer, it cannot be confirmed solely based on cervical biopsy histopathology because the biopsy may not comprehensively assess the depth and extent of tumor infiltration. The document explicitly states (in the segment with similarity 0.599): "b Stage IA requires pathological examination of a cervical conization specimen for diagnosis; it cannot be diagnosed solely by cervical biopsy histopathology." This is because cervical biopsy typically samples only a small portion of tissue and may miss deep infiltration or microscopic lesions, whereas cervical conization provides a more complete tissue sample, ensuring accurate staging (e.g., according to FIGO 2018 staging criteria). This helps avoid misdiagnosis or underestimation of the condition, which could affect treatment decisions.  # | A | A | A |
| **Question 92: According to the Querleu-Morrow (Q-M) classification, what is the difference in the management of the ureter between a Type A and a Type B1 hysterectomy?** | | | | |
| Chunk size=512, Overlap=0 Using TokenTextSplitter | based on the Q-M classification table, the key differences in ureter handling between type A and type B1 hysterectomy are as follows:  - type A hysterectomy: the ureter is identified and dissected free. the surgical scope is conservative, indicated for stage IA1 cervical cancer, and does not involve deep dissection of the ureter.  - type B1 hysterectomy: the ureter must be opened from the ureteral tunnel and laterally displaced (i.e., separation of the ureteral tunnel). the surgical scope is broader, indicated for stage IA1 cervical cancer with lymphovascular space invasion (LVSI+) and stage IA2 cervical cancer, requiring partial ureteral dissection to reduce complication risk. | B | C | C |
| Chunk size=256, Overlap=100 Using SentenceSplitter | according to the Q-M classification table, the key differences in ureter handling between Type A and Type B1 hysterectomy are as follows: - Type A hysterectomy: ureter handling is "identified but not dissected". This means the ureter is only identified in position during surgery, without anatomical dissection or mobilization, to reduce the risk of injury. This applies to low-risk cases (e.g., stage IA cervical cancer). - Type B1 hysterectomy: ureter handling is "opening the top of the tunnel and lateral displacement". This involves opening the ureteral tunnel (the passage where the ureter enters the bladder) and performing lateral displacement to more widely expose and resect the parametrial tissue. This applies to intermediate-risk cases (e.g., stage IA2 or with lymphovascular space invasion). This difference reflects an expansion of surgical extent: Type A is more conservative, while Type B1 is more radical, aiming to reduce recurrence risk but increase surgical complexity. | C | B | A |
| **Question 93: According to the Q-M surgical classification, what are the key differences between a Type C1 (nerve-sparing radical hysterectomy) and a Type C2 (classical radical hysterectomy) in terms of the dissection of the lateral parametrium and nerve preservation?** | | | | |
| Chunk size=512, Overlap=0 Using TokenTextSplitter | According to the Q-M surgical classification:  - **C1 type (nerve-sparing radical hysterectomy)**: When managing the lateral parametrial tissue, only the tissue medial to the level of the uterine deep vein is resected, avoiding injury to the pelvic autonomic nerves (e.g., the inferior hypogastric plexus). Nerve function is preserved through meticulous dissection, reducing postoperative bladder and rectal dysfunction.  - **C2 type (classic radical hysterectomy)**: The lateral parametrial tissue is widely resected, including up to the level of the internal iliac vein, with no preservation of neural structures (e.g., complete transection of the parametrial nerve plexus), resulting in a higher risk of nerve injury.  The key difference is that the C1 type limits the resection range and employs targeted nerve-sparing techniques (such as identifying and protecting nerve bundles) to reduce complications, whereas the C2 type involves broader parametrial resection without nerve preservation. | B | B | B |
| Chunk size=256, Overlap=100 Using SentenceSplitter | According to the Q-M surgical classification, the key differences between Type C1 (nerve-sparing radical hysterectomy) and Type C2 (classical radical hysterectomy for cervical cancer) in the management of lateral parametrial tissue and nerve preservation are as follows:   - **Management of Lateral Parametrial Tissue**:   - **Type C1**: The lateral parametrial tissue is resected to the level of the pelvic sidewall fascia, while actively identifying and avoiding neural structures (e.g., ureteral nerves, pelvic plexus) to maximize preservation of autonomic nerve function.   - **Type C2**: The lateral parametrial tissue is extensively resected, including the full thickness of the cardinal ligament, typically extending to the pelvic sidewall, with dissection of the ureter to the bladder entrance, without deliberate preservation of neurovascular bundles.   - **Nerve Preservation**:   - **Type C1**: Systematic preservation of pelvic autonomic nerves (including the inferior hypogastric plexus, pelvic nerves, and visceral nerve branches) is performed by sharp dissection during manipulation of the uterosacral ligament and lateral rectal space to protect nerve fibers, aiming to reduce postoperative bladder, rectal, and sexual dysfunction.   - **Type C2**: Nerve preservation is not emphasized; routine resection includes the cardinal ligament and parametrial tissue containing neurovascular bundles, which may lead to pelvic autonomic nerve injury and increase the risk of voiding dysfunction, constipation, or sexual dysfunction.   → **Summary**: Type C1 preserves nerve function through precise dissection while resecting parametrial tissue, whereas Type C2 adopts a more extensive resection standard, sacrificing neural integrity for oncological safety. | D | D | D |
| **Question 94: What pathological types are included in the Grade I recommendations for fertility-sparing surgery in cervical cancer?** | | | | |
| Chunk size=512, Overlap=0 Using TokenTextSplitter | cervical cancer fertility-sparing surgery (such as radical trachelectomy) has the following pathological types as Level I recommendation (strong recommendation) indications:  - Squamous cell carcinoma  - Adenocarcinoma (including conventional-type adenocarcinoma)   Other pathological types (such as small cell carcinoma, clear cell carcinoma, or adenosquamous carcinoma) are generally not recommended due to insufficient evidence or poor prognosis.   Specific conditions for Level I recommendation include:  - IA1 stage without lymphovascular space invasion (LVSI)  - IA2 or IB1 stage (tumor diameter ≤ 2 cm)  - Patient has a strong desire for fertility preservation.   Based on source document fragment (similarity: 0.477). | C | C | C |
| Chunk size=256, Overlap=100 Using SentenceSplitter | the pathological types included in the Level I recommendation indications for fertility-sparing surgery for cervical cancer are not specified in the provided documents. The documents discuss fertility-sparing surgery indications for eligible patients desiring fertility preservation and mention surgical options such as cervical conization, but do not explicitly list Level I recommended pathological types (e.g., squamous cell carcinoma, adenocarcinoma). Reference to cervical adenocarcinoma management is made (e.g., in similarity 0.549 fragment), but it is not designated as a Level I recommendation or restricted to specific pathological types. Therefore, the information is not available in the given materials. | D | D | D |
| **Question 95: When treating locally advanced cervical cancer with external beam radiotherapy (EBRT), what technique is recommended for dose escalation to unresectable lymph nodes, and what is the recommended boost dose?** | | | | |
| Chunk size=512, Overlap=0 Using TokenTextSplitter | for locally advanced cervical cancer during external beam radiotherapy (EBRT), when encountering unresectable lymph nodes:  - Recommended technique: Intensity-modulated radiotherapy (IMRT) or stereotactic body radiotherapy (SBRT) for boost irradiation to precisely target lymph nodes and minimize damage to surrounding normal tissues.  - Recommended boost dose: 9–15 Gy added to the EBRT base dose (typically 45–50 Gy), resulting in a total dose of 54–65 Gy; the specific dose is adjusted based on lymph node size and location, with common fractionation schemes of 1.8–2.0 Gy per fraction. | B | B | B |
| Chunk size=256, Overlap=100 Using SentenceSplitter | for locally advanced cervical cancer undergoing external beam radiotherapy (EBRT), when encountering unresectable lymph nodes, it is recommended to use highly conformal radiotherapy techniques for boost irradiation, with a recommended boost dose of 10–15 Gy.  According to the source material: “Unresectable lymph nodes can be treated with highly conformal radiotherapy techniques, delivering a simultaneous integrated boost or sequential boost of 10–15 Gy.” This includes techniques such as intensity-modulated radiotherapy (IMRT) or stereotactic body radiotherapy (SBRT) to precisely target the lymph node regions while minimizing dose to surrounding normal tissues. The document emphasizes that this applies to image-guided EBRT and must be combined with clinical assessment (e.g., lymph node size and location). | B | B | B |
| **Question 96: In the definitive radiotherapy for locally advanced cervical cancer, brachytherapy is a critical component. What is the recommended target for the equivalent dose in 2-Gy fractions (EQD2) to Point A or the high-risk clinical target volume (HR-CTV)? To protect surrounding organs at risk, what are the dose constraints for the rectum and bladder?** | | | | |
| Chunk size=512, Overlap=0 Using TokenTextSplitter | no  During radical radiotherapy for locally advanced cervical cancer, brachytherapy (afterloading) is a critical component. The recommended equivalent biological dose (EQD2) target for point A or high-risk clinical target volume (HR-CTV) is:  - D90 EQD2 of 80–85 Gy for standard cases - EQD2 ≥ 87 Gy for large or poorly regressing tumors  Dose constraints for surrounding normal organs are: - Rectum: D2cc ≤ 65–75 Gy - Bladder: D2cc ≤ 80–90 Gy (Note: The document specifies $D_{2\mathrm{e}}$, but in context, this refers to D2cc dose limits)  These constraints aim to minimize normal tissue injury. If the parameters cannot be met, interstitial implant techniques should be considered as a supplement. | A | A | A |
| Chunk size=256, Overlap=100 Using SentenceSplitter | no answer found in the knowledge base for the EQD2 target value of point A or HR-CTV.  For organ dose constraints during radical radiotherapy for locally advanced cervical cancer:  - Rectum D2cc ≤ 70–75 Gy (EQD2, α/β=3 Gy)  - Bladder D2cc ≤ 75–80 Gy (EQD2, α/β=3 Gy)   Note: While the knowledge base specifies rectal and bladder dose limits in EQD2, it does not provide an explicit EQD2 target value for point A or HR-CTV, only the prescribed physical dose ranges (e.g., 20–35 Gy in 4–6 fractions). Equivalent biological dose calculations would require specification of fractionation and α/β ratio, which are not provided for the target in the source material. | D | D | D |
| **Question 97: For patients with locally advanced cervical cancer receiving concurrent chemoradiotherapy, what is the standard weekly chemotherapy regimen (including drug name and dosage) recommended by the guidelines? If a patient cannot tolerate this regimen, what are the alternative options?** | | | | |
| Chunk size=512, Overlap=0 Using TokenTextSplitter | Based on contextual information (similarity score 0.645 fragment), the standard weekly regimen for concurrent chemoradiotherapy is:  - Drug name: Cisplatin (DDP)  - Dosage: 40 mg/m², once weekly, for a total of 4~6 cycles.  This regimen is typically administered during pelvic external beam radiation therapy (EBRT).   If the patient cannot tolerate the weekly cisplatin regimen, the alternative option is:  - Drug name: Carboplatin  - Dosage: AUC 2, once weekly, for a total of 4~6 cycles.  This regimen is also implemented concurrently with pelvic radiotherapy and is suitable for patients with contraindications or poor tolerance to cisplatin. | B | B | B |
| Chunk size=256, Overlap=100 Using SentenceSplitter | standard weekly chemotherapy regimen: based on the document content, the recommended regimen is weekly cisplatin (DDP):  - Drug name: cisplatin (DDP).  - Dose: $40 \, \mathrm{mg/m}^2$ (40 milligrams per square meter of body surface area).  - Frequency: once weekly, for 4 to 6 cycles.  - Source: the document fragment (similarity: 0.539) explicitly states: “The recommended concurrent chemotherapy regimen is weekly cisplatin (DDP $40 \, \mathrm{mg/m}^2$, once weekly, 4–6 cycles)”.  - Alternative regimen if the patient cannot tolerate the above:  - Carboplatin or platinum-based doublet chemotherapy is recommended:  - Carboplatin: AUC=2 (dose calculated based on area under the curve), once weekly, for 4 to 6 cycles.  - Or platinum-based doublet radiosensitizing chemotherapy (specific drugs not detailed, but the document mentions “platinum-based doublet”).  - Source: the same document fragment (similarity: 0.539) indicates: “If cisplatin is intolerable, choose carboplatin (AUC=2, once weekly, 4–6 cycles) or platinum-based doublet radiosensitizing chemotherapy.” | A | A | A |
| **Question 98: According to the "Sedlis criteria," for a patient with squamous cell carcinoma, a tumor size of 3 cm, the presence of lymphovascular space invasion (LVSI), and an invasion depth to the middle third of the cervical stroma, do these findings meet the criteria for intermediate-risk factors?** | | | | |
| Chunk size=512, Overlap=0 Using TokenTextSplitter | yes | B | A | A |
| Chunk size=256, Overlap=100 Using SentenceSplitter | no  Judgment result: Yes, meets the criteria for intermediate-risk factors. - Basis:  - The document references the Sedlis standard to define intermediate-risk factors, specifically for squamous cell carcinoma patients.  - According to the document excerpt (similarity: 0.545): “For patients with squamous cell carcinoma, intermediate-risk factors (tumor size, stromal invasion, lymphovascular space invasion) can be referred to the ‘Sedlis standard’ [1] (Table 9-1).” Table 9-1 specifies:  - “Lymphovascular space invasion (LVSI) positive + middle 1/3 stromal invasion: tumor size ≥2cm”  - Patient status:  - Tumor size: 3cm (≥2cm, meets condition).  - LVSI: positive (meets condition).  - Invasion depth: middle 1/3 (meets condition).  - Therefore, the combination of LVSI positive + middle 1/3 stromal invasion + tumor size ≥2cm qualifies as an intermediate-risk factor under the Sedlis standard. | A | A | A |
| **Question 99: For patients with early-stage cervical cancer who have undergone radical surgery, which postoperative pathological findings are defined as "high-risk factors" necessitating adjuvant therapy?** | | | | |
| Chunk size=512, Overlap=0 Using TokenTextSplitter | For early-stage cervical cancer patients who have undergone radical surgery, the following postoperative pathological findings are defined as "high-risk factors" warranting adjuvant therapy:  - Lymph node positivity  - Positive surgical margins  - Parametrial infiltration   The presence of any one high-risk factor recommends further imaging (e.g., to rule out distant metastasis) and adjuvant treatment with pelvic external beam radiotherapy plus concurrent platinum-based chemotherapy ± vaginal brachytherapy (evidence level I). | A | A | A |
| Chunk size=256, Overlap=100 Using SentenceSplitter | For patients with early-stage cervical cancer who have undergone radical surgery, the following postoperative pathological findings are defined as "high-risk factors" and thus require adjuvant treatment:  - High-risk factors are defined as:  - Lymph node positivity (i.e., pelvic lymph node metastasis).  - Positive surgical margins (i.e., residual cancer cells at the resection edge).  - Parametrial infiltration (i.e., tumor invasion into the parametrial tissue). - Rationale:  - A document excerpt (similarity: 0.545) explicitly states: “‘High-risk factors’ include lymph node positivity, positive margins, and parametrial infiltration. The presence of any one ‘high-risk factor’ warrants further imaging to assess for metastatic disease in other sites. If there is no para-aortic lymph node involvement or distant metastasis, adjuvant external beam pelvic radiotherapy plus concurrent platinum-based chemotherapy (evidence level I) ± vaginal brachytherapy is recommended.”  - Another excerpt (similarity: 0.481) also supports: “High-risk factors include positive surgical margins, lymph node metastasis, or parametrial spread.”  - These factors trigger adjuvant therapy (such as radiotherapy or chemoradiotherapy) to reduce the risk of recurrence. | A | A | A |
| **Question 100: What advantages has the sequential chemoradiotherapy regimen demonstrated? Under what specific conditions is this regimen recommended for use?** | | | | |
| Chunk size=512, Overlap=0 Using TokenTextSplitter | Sequential chemoradiotherapy regimens demonstrate the following advantages:  - Higher 3-year disease-free survival (DFS) rates  - Ability to reduce mortality risk   This regimen is recommended for use under specific conditions: in regions with constrained radiotherapy resources (e.g., insufficient equipment or technology), it may serve as an alternative option. Research (STARS study) indicates that in patients with IB1–IIA2 stage disease who have undergone radical surgery and have pathological high-risk factors, the DFS rate in the sequential chemoradiotherapy group was superior to that in the radiotherapy-only group and the concurrent chemoradiotherapy group, with similar rates of adverse reactions. | A | A | A |
| Chunk size=256, Overlap=100 Using SentenceSplitter | sequential chemoradiation regimen demonstrates the following advantages: - Higher 3-year disease-free survival (DFS) rate and reduced risk of death compared to other approaches. - Evidence: A domestic Phase III study (STARS study) randomized patients with IB1 to IIA2 stage cervical cancer who had undergone radical surgery with pathological high-risk factors into three groups: radiotherapy alone, concurrent chemoradiation, and sequential chemoradiation. Results showed that the first two groups had similar rates of grade 3–4 adverse events, while the sequential chemoradiation group achieved a higher 3-year DFS rate and reduced mortality risk.  The regimen is recommended for use under the following specific conditions: - In regions with limited radiotherapy resources. - Evidence: The same source indicates it "can be used in areas with constrained radiotherapy resources [6-7]", suggesting sequential chemoradiation serves as an alternative to optimize resource utilization while maintaining efficacy when concurrent chemoradiation cannot be routinely implemented. | A | A | A |
| **Question 101: What two parts form the connective body of Mackenrodt's ligament?** | | | | |
| Chunk size=512, Overlap=0 Using TokenTextSplitter | Mackenrodt ligament is a structure formed by the L-shaped junction of the transverse cervical ligament and the short fibrous bundle at the level of the ischial spine. Specifically: - The transverse cervical ligament is part of the cardinal ligament, located at the center of the greater sciatic foramen, originating at the level of the arcuate line (approximately the fifth lumbar vertebra) and terminating at the region where it attaches to the ischial spine. - The short fibrous bundle is part of the levator ani muscle fascia or the superior fascia of the pelvic diaphragm, corresponding to a portion of the paravaginal connective tissue. Therefore, the Mackenrodt ligament is composed of the transverse cervical ligament and the short fibrous bundle. | A | B | A |
| Chunk size=256, Overlap=100 Using SentenceSplitter | Mackenrodt ligament is a connecting structure composed of the transverse cervical ligament and the horizontal connective tissue basal bundle (also referred to as the short fiber bundle). Specifically: - The document states: “Mackenrodt ligament refers to the complex formed by the transverse cervical ligament and the horizontal connective tissue basal bundle.” (Source: [Similarity: 0.436] segment) - Another passage notes: “The author proposes that the Mackenrodt ligament should be the connecting structure formed by the anterior fascia of the transverse cervical ligament (the fascia forming the surface of the lateral bladder cavity) and the short fiber bundle.” (Source: [Similarity: 0.436] segment) Therefore, the Mackenrodt ligament is a connecting structure composed of the transverse cervical ligament and the horizontal connective tissue basal bundle (or short fiber bundle). | A | A | A |
| **Question 102: How is the cardinal ligament dissected during a Latzko's operation?** | | | | |
| Chunk size=512, Overlap=0 Using TokenTextSplitter | how to separate the cardinal ligament during the Latzko procedure  according to the document content (segments with similarity 0.562 and 0.483), the process of separating the cardinal ligament in the Latzko procedure involves the following steps: - first, develop the paravesical space and the pararectal space down to the level of the levator ani muscle. this is achieved by dissecting the spaces, for example, incising part of the superior fascia of the levator ani at the bottom of the paravesical space to expose the caudal compartment of the pararectal space. - then, create a tunnel at the base of the lateral pelvic ligament (i.e., the cardinal ligament) to connect it with the caudal compartment of the pararectal space. this is typically done using forceps (such as straight forceps) to grasp the visceral end of the cardinal ligament and pull it medially to maintain tension. - finally, the entire cardinal ligament is taken as the resection target, clamped with forceps, then cut and ligated. the document emphasizes that the cardinal ligament is treated as a single connective tissue bundle in the Latzko procedure, and care must be taken during resection to avoid injury to surrounding structures such as the pelvic splanchnic nerves. in summary, the method for separating the cardinal ligament is: by developing the paravesical and pararectal spaces to the level of the levator ani muscle, using forceps to clamp the exposed cardinal ligament, followed by its resection. | A | A | A |
| Chunk size=256, Overlap=100 Using SentenceSplitter | how to separate the cardinal ligament in the Latzko procedure:  In the Latzko procedure, separation of the cardinal ligament involves developing the paravesical and pararectal spaces and clamping the exposed cardinal ligament with a straight clamp for resection. The specific steps are as follows: - First, develop the paravesical and pararectal spaces down to the level of the levator ani muscle. This includes incising part of the superior fascia of the levator ani to expose the caudal chamber of the pararectal space. (Source: [Similarity: 0.548] segment: "Develop the paravesical space, then incise part of the superior fascia of the levator ani to expose the caudal chamber of the pararectal space") - Next, create a tunnel at the base of the pelvic lateral ligament (i.e., the cardinal ligament) to connect it with the caudal chamber of the pararectal space. Grasp the visceral end of the cardinal ligament with a clamp and pull it medially. (Source: [Similarity: 0.548] segment) - Finally, clamp the entire separated cardinal ligament with a straight clamp and resect it. (Source: [Similarity: 0.548] segment: "In the Latzko procedure, the entire ligament is resected") In summary, the separation process relies on space development and clamping techniques to ensure complete exposure and resection of the cardinal ligament. | A | A | A |
| **Question 103: According to Otcenasek's theory, into which three parts can the uterosacral ligament be divided?** | | | | |
| Chunk size=512, Overlap=0 Using TokenTextSplitter | according to Otcenasek's theory, the uterosacral ligament can be divided into the following three parts: - vascular part: refers to the portion of the transverse cervical ligament involving vascular structures. - neural part: includes the inferior hypogastric nerve and the pelvic splanchnic nerves. - true uterosacral ligament: refers to the original fibrous connective tissue portion.  The document explicitly states that this division is based on the layered structure of the uterosacral ligament in the ventrodorsal direction, where the vascular part and neural part are actually components of the transverse cervical ligament, and the true uterosacral ligament is an independent structure. Therefore, the uterosacral ligament can be divided into three parts: vascular part, neural part, and true uterosacral ligament. | A | A | A |
| Chunk size=256, Overlap=100 Using SentenceSplitter | according to Otcenasek's theory (based on the 2008 publication), the uterosacral ligament can be divided into the following three parts: - vascular part: refers to a portion of the transverse cervical ligament, involving vascular structures. - neural part: includes the inferior hypogastric nerve and the pelvic splanchnic nerves. - true uterosacral ligament: refers to the fibrous connective tissue portion.  The document explicitly states: “Otcenasek et al. (Obstet Gynecol, 2008) described that ‘the uterosacral part of the septum is further subdivided into three small parts—the vascular part, the neural part, and the true uterosacral ligament.’” (Source: [Similarity: 0.567] fragment). Another supplement states: “uterosacral ligament ≡ transverse cervical ligament (vascular part) + inferior hypogastric nerve, pelvic splanchnic nerves (neural part) + true uterosacral ligament.” (Source: [Similarity: 0.567] fragment). Therefore, these three parts are based on a subdivision in the ventrodorsal direction. | A | A | A |
| **Question 104: What is the method for developing the cranial compartment of Latzko's pararectal space?** | | | | |
| Chunk size=512, Overlap=0 Using TokenTextSplitter | the method for forming the cranial chamber of the pararectal space (Latzko) is as follows: - The posterior fascia of the transverse cervical ligament is a continuation of the vascular sheath of the internal iliac artery and vein, covering the ligament posteriorly as the visceral-side fascia. - By dissecting the vascular sheath of the internal iliac artery and vein and the posterior fascia of the transverse cervical ligament away from their respective structures (i.e., the vessels and ligament), an artificial space is created. - This dissection exposes structures such as the internal iliac artery and vein, uterine artery, and deep uterine vein, and forms the pararectal space (cranial chamber, Latzko). The space is bounded by the exposed vessels, the visceral-side branches posterior to the ligaments, and the dissected fascia; deeper levels may reveal the pelvic visceral nerves and the coccygeus muscle fascia. Therefore, the formation method is: dissection of the posterior fascia of the transverse cervical ligament and the internal iliac vascular sheath from their native structures to create the space. | A | A | A |
| Chunk size=256, Overlap=100 Using SentenceSplitter | the method for forming the cranial chamber of the pararectal space (Latzko's pararectal space cranial chamber) is by dissecting the peritoneum behind the frontal connective tissue ground bundle. the specific process includes:  - dissecting the peritoneum posterior to the frontal connective tissue ground bundle to develop the cranial chamber of the pararectal space.  - this maneuver facilitates exposure of the origin of the transverse cervical ligament and is used intraoperatively for managing structures such as the cardinal ligament.  therefore, formation relies on peritoneal dissection of specific connective tissue bundles to create the cranial chamber space. | A | A | A |
| **Question 105: In the pelvic suspension system, which ligaments have the properties of longitudinal fascia? What structures do these ligaments connect?** | | | | |
| Chunk size=512, Overlap=0 Using TokenTextSplitter | In the pelvic suspension system, ligaments with longitudinal fascial properties include:  - Pubovesical/urethral ligament: Connects the pubic bone to the vesical fascia.  - Vesicouterine/vaginal ligament: Connects the vesical fascia to the cervical/vaginal fascia.  - Uterosacral ligament and rectouterine ligament: Connects the cervical/vaginal fascia to the rectal fascia.  - Rectococcygeal ligament: Connects the rectal fascia to the sacrum.   These ligaments collectively maintain the longitudinal suspension function of the organs, connecting organ nodes from the pubic bone toward the sacrum, and work synergistically with the support system (transverse ligament group). | A | A | A |
| Chunk size=256, Overlap=100 Using SentenceSplitter | In the pelvic suspensory system, the ligaments with longitudinal fascial characteristics include the pubovesical/urethral ligament, vesicouterine ligament, uterosacral ligament, rectouterine ligament and rectovaginal ligament, and rectococcygeal ligament. These ligaments longitudinally connect multiple pelvic structures from the pubis toward the sacrum: - Pubovesical/urethral ligament: Connects the pubis to the bladder and urethra, fixing the position of the bladder and urethra. (Source: [Similarity: 0.467] segment: “The pubourethral/pubovesical ligament runs from the internal urethral orifice to the bladder apex, fixing the bladder and urethra to the pubis”) - Vesicouterine ligament: Connects the bladder to the cervix/uterus, assisting in fixing the bladder and uterus. (Source: [Similarity: 0.467] segment: The suspensory system includes “vesicouterine ligament”) - Uterosacral ligament: Connects the cervix/uterus to the sacrum, providing longitudinal support for the uterus. (Source: [Similarity: 0.467] segment: The suspensory system includes “uterosacral ligament”) - Rectouterine ligament and rectovaginal ligament: Connect the rectum to the uterus or vagina, assisting in fixing the position of the rectum. (Source: [Similarity: 0.467] segment: The suspensory system includes “rectouterine/vaginal ligament”) - Rectococcygeal ligament: Connects the rectum to the coccyx, providing caudal fixation for the rectum. (Source: [Similarity: 0.467] segment: The suspensory system includes “rectococcygeal ligament”) These ligaments collectively form a longitudinal connection from the pubis toward the sacrum, linking the bladder, cervix/uterus, and rectum to maintain the position and function of pelvic organs. (Source: [Similarity: 0.467] segment: “The suspensory system longitudinally connects several nodes from the pubis to the sacrum”, and [Similarity: 0.441] segment: “The suspensory system connects the respective fascia or adventitia of the bladder, cervix/uterus, and rectum to the pubis and sacrum”). | A | B | A |
| **Question 106: How are the transverse cervical ligament and the pararectal ligament differentiated during a radical hysterectomy?** | | | | |
| Chunk size=512, Overlap=0 Using TokenTextSplitter | in radical hysterectomy, identification of the transverse cervical ligament and the rectal lateral ligament is achieved by developing specific surgical spaces. According to the source: - The transverse cervical ligament (also considered part of the cardinal ligament complex) and the rectal lateral ligament are anatomically viewed as a composite (cardinal ligament = transverse cervical ligament + rectal lateral ligament). Identification requires exposure through the development of the paravesical space and the rectal lateral space. - Specific identification methods:  - Development of the Latzko rectal lateral space: By dissecting the fascial sheath of the internal iliac vessels and the posterior fascia of the transverse cervical ligament, the cephalad compartment of the rectal lateral space is formed. The transverse cervical ligament is located anterior to this space; its origin can be identified at the branching point of the internal iliac vessels (e.g., uterine artery branch) (referencing sections with [similarity: 0.691] and [similarity: 0.584]).  - Identification of the rectal lateral ligament: The rectal lateral ligament lies posterior to the transverse cervical ligament and is connected to the rectum. During development of the rectal lateral space, it is exposed by separating the uterosacral ligament and the rectovaginal space. The rectal lateral ligament is typically visible near the pelvic floor (sacral surface) and is associated with the pelvic nerve plexus (referencing sections with [similarity: 0.635] and [similarity: 0.584]). - Key point: The transverse cervical ligament is vascular-rich (containing uterine artery and deep uterine vein), while the rectal lateral ligament is more neuro-connective. During surgery, avoid mass ligation; instead, separate the fascial and vascular components to clearly delineate the boundary between the two structures. | B | B | B |
| Chunk size=256, Overlap=100 Using SentenceSplitter | no  In radical hysterectomy, the key to identifying the transverse cervical ligament and the rectal lateral ligament lies in dissecting specific anatomical spaces to expose these structures. The documentation states that the cardinal ligament is a composite of the transverse cervical ligament and the rectal lateral ligament (cardinal ligament = transverse cervical ligament + rectal lateral ligament). Identification methods include: - Dissection of spaces: By opening the paravesical space and the pararectal space (including the cranial and caudal compartments), the transverse cervical ligament and rectal lateral ligament can be exposed. The transverse cervical ligament is located paracervically and represents the cephalad portion of the cardinal ligament; the rectal lateral ligament is located pararectally and represents the caudal portion of the cardinal ligament. - Anatomical landmarks: The transverse cervical ligament is associated with the uterine artery and deep uterine vein, with its origin from the pelvic sidewall visible during dissection; the rectal lateral ligament is connected to the middle rectal vessels and pelvic plexus, and becomes evident when dissecting the pararectal space as it attaches to the rectal sidewall. - Surgical technique: In the Latzko approach, identification is achieved by developing the paravesical space and the caudal compartment of the pararectal space; in the Okabayashi approach, differentiation is accomplished by dissecting the paravaginal space and the pararectal space. The documentation emphasizes that care must be taken to avoid injury to the presacral venous plexus and the inferior gluteal-internal pudendal vessels during identification.  Source: Multiple passages define the composition of the cardinal ligament and its identification, e.g., "cardinal ligament (author’s note: cardinal ligament = transverse cervical ligament + rectal lateral ligament)" and "In radical hysterectomy, the depth of developing the Latzko pararectal space does not require complete exposure up to the sacral surface as in the Latzko and Okabayashi techniques; dissection to a level slightly deeper than the deep uterine vein is sufficient." | B | A | A |
| **Question 107: Briefly describe the course of the pelvic autonomic nerves.** | | | | |
| Chunk size=512, Overlap=0 Using TokenTextSplitter | the course of the pelvic autonomic nerves is detailed in the document as follows:  - Hypogastric nerve: Descends along the lateral wall of the pelvis, positioned lateral to the ureter and internal iliac vessels, and courses toward the lateral side of the rectum. - Pelvic splanchnic nerves: Originate from the sacral nerve roots (S2–S4), exit through the sacral foramina, and course ventrally into the pelvic floor. They converge with the hypogastric nerve near the lateral rectal ligament. - Pelvic nerve plexus: Formed by the convergence of the hypogastric nerve and pelvic splanchnic nerves in the region of the lateral rectal ligament. This plexus is located deep to the transverse cervical ligament and the lateral rectal ligament. - Branch courses:  - Bladder branch: Courses along the posterior layer of the vesicouterine ligament (especially the vesicocervical ligament), runs parallel to the superior vesical vein, and ultimately enters the bladder.  - Rectal branch: Distributed along the rectovaginal ligament and enters the rectum. - The overall course is three-dimensional: Nerves radiate from the lateral pelvic wall toward the visceral organs. Care must be taken to preserve them during dissection of potential spaces (such as the lateral rectal space and vaginal pararectal space), as referenced in the document sections "[Similarity: 0.635]", "[Similarity: 0.584]", and "[Similarity: 0.515]". | A | A | A |
| Chunk size=256, Overlap=100 Using SentenceSplitter | please briefly describe the course of the pelvic autonomic nerves  The course of the pelvic autonomic nerves involves their origin from the sacral nerve roots, distribution along the lateral walls of the pelvis, and terminal branching to organs such as the bladder and rectum. The document describes this as follows: - Origin and pathway: The pelvic autonomic nerves mainly consist of the pelvic splanchnic nerves (originating from the sacral nerve roots), forming the pelvic nerve plexus (located in the area of the rectal lateral ligament). The plexus courses along the deep uterine vein and the transverse cervical ligament, branching into the vesical nerve branch and the rectal nerve branch. - Key relationships: The nerves course parallel to vascular bundles (e.g., the superior vesical vein), particularly in the posterior layer of the vesicouterine ligament. For example, the vesical nerve branch courses together with the superior vesical vein in the deep layer of the vesicouterine ligament. - Visibility during surgery: The nerves can be exposed when dissecting the rectal lateral space and vaginal lateral space. The document states that the pelvic nerve plexus is located within the rectal lateral ligament, and the vesical nerve branches are distributed near the posterior layer of the vesicouterine ligament.  Document source: Phrases such as "the course of the pelvic autonomic nerves" and "the vesical nerve branch emitted by the pelvic plexus", as well as "while tracing this vein, it was found to share a common course with the bladder nerve within the ligament". | B | B | B |
| **Question 108: During a radical hysterectomy, the preservation of which nerve branches helps protect bladder function?** | | | | |
| Chunk size=512, Overlap=0 Using TokenTextSplitter | in radical total hysterectomy, preserving the following nerve branches helps protect bladder function:  - Key nerve branches: Preservation of the pelvic plexus and its bladder branches (vesical nerve branches) aids in protecting bladder function. The bladder branches course within the posterior layer of the vesicouterine ligament, running parallel to the superior vesical veins. - Preservation method: During surgery, avoid cutting the neural portion within the posterior layer of the vesicouterine ligament, and only address the vascular portion. Specifically:  - When dissecting the posterior layer of the vesicouterine ligament, identify and preserve the bladder nerve branches within it.  - Avoid en bloc resection of the cardinal ligament or the lateral rectal ligament to minimize injury to the pelvic plexus. - Document emphasis: Preserving these nerve branches improves postoperative recovery of urinary sensation and reduces residual urine (as stated in the document under "[similarity: 0.635]": "Preserving the pelvic plexus and its bladder branches... elevates Japan's radical total hysterectomy to an unprecedented global standard in safety and organ function preservation" and under "[similarity: 0.584]": "Preserving part of the pelvic visceral nerves and the pelvic plexus and its bladder branches not only restored urinary sensation postoperatively but also resulted in virtually no residual urine"). | B | B | B |
| Chunk size=256, Overlap=100 Using SentenceSplitter | In radical total hysterectomy, preserving the following nerve branches helps protect bladder function:  - Key nerve branches: Preservation of the pelvic plexus (located in the parametrial region of the rectum) and its bladder branches (distributed to the bladder) is essential. These nerve branches control bladder contraction and sensory function. - Preservation method: During surgery, nerve sparing can be achieved by avoiding global clamping of the transverse cervical ligament and the rectal parametrium, and by separating the vascular portion from the neural portion (e.g., cutting only the vessels while preserving the nerves). Specific strategies include, when handling the posterior layer of the vesicouterine ligament, cutting only the vascular part (such as the superior vesical vein) while preserving the parallel nerve bundles. - Effect: The document states that preserving these nerve branches reduces postoperative bladder atony and residual urine issues. For example, "preserving the pelvic plexus and its bladder branches" and "preserving the bladder nerve branches" are focal points in designing nerve-sparing procedures.  Document source: Multiple sections discuss nerve-sparing surgery, such as "the focus of designing pelvic autonomic nerve-sparing surgery lies in anatomy, that is, the task is to preserve the pelvic plexus and its bladder branches" and "the extent of preservation should ensure no impairment of bladder function or inconvenience in daily life for the patient postoperatively." | B | B | B |
| **Question 109: What are the differences between the Latzko and Okabayashi operations? Please briefly describe these differences.** | | | | |
| Chunk size=512, Overlap=0 Using TokenTextSplitter | what are the differences between the Latzko and Okabayashi surgical techniques? Please briefly describe their distinctions.  The Latzko and Okabayashi procedures are two primary methods for radical hysterectomy. The document provides a detailed comparison of their differences, summarized as follows: - Basis of concept differs:  - Latzko technique: Based on a two-dimensional anatomical concept, treating pelvic connective tissue as planar structures, with the procedure focused on extending ligament resection from simple hysterectomy (see "[Similarity: 0.545]" section).  - Okabayashi technique: Based on a three-dimensional concept, emphasizing spatial dissection of cavities and ligaments, dividing the vesicouterine ligament into anterior and posterior layers for separate handling (see "[Similarity: 0.545]" and "[Similarity: 0.530]" sections). - Method of developing the rectolateral space differs:  - Latzko technique: Divides development into cephalic and caudal compartments. The cephalic compartment is formed by stripping the posterior fascia of the transverse cervical ligament; the caudal compartment is formed by incising the superior fascia of the levator ani. After communication between both compartments, the main ligament is resected (see "[Similarity: 0.545]" table).  - Okabayashi technique: Develops a single rectolateral space medial to the ureter and hypogastric nerve, with emphasis on operating medial to the uterosacral ligament, without explicit differentiation of cephalic and caudal compartments (see "[Similarity: 0.545]" section). - Handling of the vesicouterine ligament differs:  - Latzko technique: Does not specify layered division; treats it as the connection between the transverse cervical ligament and bladder, managed as a whole (see "[Similarity: 0.545]" section).  - Okabayashi technique: Clearly divides into anterior layer (equivalent to the roof of the ureteric tunnel) and posterior layer (containing the vascular-nerve bundle connecting the transverse cervical ligament and bladder), each transected separately (see "[Similarity: 0.635]" and "[Similarity: 0.545]" sections). - Method of main ligament resection differs:  - Latzko technique: Develops the cephalic part of the rectolateral space behind the transverse cervical ligament, then clamps and resects the main ligament en bloc, extending to the greater sciatic foramen (see "[Similarity: 0.530]" table).  - Okabayashi technique: Dissects the main ligament between the paravesical space and rectolateral space, with resection centered on the iliac fossa, avoiding excessive dissection into the pelvic floor (see "[Similarity: 0.530]" section). - Other differences: Include management of paravaginal connective tissue (Latzko resects the superior levator ani fascia as a whole; Okabayashi resects only the connective tissue around the vagina) and surgical sequence (Latzko addresses anterior supporting ligaments first; Okabayashi addresses posterior supporting ligaments first) (see "[Similarity: 0.545]" and "[Similarity: 0.530]" sections). | A | A | A |
| Chunk size=256, Overlap=100 Using SentenceSplitter | what are the differences between the Latzko and Okabayashi surgical procedures? Please briefly describe their distinctions.  The Latzko and Okabayashi procedures are two primary methods for radical hysterectomy. The document details their differences, mainly based on surgical philosophy, cavity dissection, and ligament management: - Core philosophy:  - Latzko procedure: Two-dimensional, based on European traditional anatomy, viewing surgery as an extension on a plane (e.g., simply expanding the resection range of simple hysterectomy toward the pelvic sidewall). It emphasizes dissection of the lateral bladder space and the cranial compartment of the rectal lateral space.  - Okabayashi procedure: Three-dimensional, refining the European concept by emphasizing stereoscopic structures (e.g., separating the anterior and posterior layers of the vesicouterine ligament). It dissects the vaginal lateral space, lateral bladder space, and rectal lateral space, clarifying the stereoscopic relationships of each ligament. - Cavity dissection:  - Latzko procedure: Primarily opens the lateral bladder space and the cranial compartment of the rectal lateral space, connecting the cranial and caudal compartments to separate the cardinal ligament.  - Okabayashi procedure: Dissects the vaginal lateral space, lateral bladder space, and rectal lateral space, allowing these cavities to connect naturally to facilitate separate ligament management. - Ligament management:  - Latzko procedure: Clamps and cuts the cardinal ligament as a whole (including the transverse cervical ligament), with the resection range extending to the greater sciatic foramen.  - Okabayashi procedure: Divides the vesicouterine ligament into anterior and posterior layers for separate division and independently manages the transverse cervical ligament, with the resection range centered on the iliac fossa and the base extending to the levator ani superior fascia. - Other differences: The Okabayashi procedure places greater emphasis on the potential for nerve preservation (though not initially recognized), while the Latzko procedure is simpler but prone to leaving issues such as contradictory stump ends at the pelvic sidewall.  Document source: Specific tables and descriptions, such as "Latzko procedure: two-dimensional... dissects the lateral bladder space and the cranial/caudal compartments of the rectal lateral space...; Okabayashi procedure: three-dimensional... when dissecting the vaginal lateral space and lateral bladder space, separates the anterior and posterior layers of the vesicouterine ligament." | B | B | B |
| **Question 110: How is the vesicouterine ligament dissected and transected in the Okabayashi operation?** | | | | |
| Chunk size=512, Overlap=0 Using TokenTextSplitter | in Okabayashi surgery, the separation and division of the vesicouterine ligament is a critical step, described in the documentation as follows:  - **Separation method**:   - First, develop the lateral vaginal space and the lateral vesical space to expose the vesicouterine ligament.   - Clearly divide the ligament into an anterior layer and a posterior layer: the anterior layer connects the cervix and bladder (equivalent to the roof of the ureteric tunnel), and the posterior layer connects the transverse cervical ligament and the bladder (containing vessels and nerves).   - During separation, use instruments (such as scissors or electrocautery) within the loose connective tissue layer to avoid injury to the ureter and nerves. Specific steps include: after dissecting the vesical peritoneum, horizontally incise the vesicouterine pouch to separate the bladder from the cervical fascia, exposing the ligament structure (refer to sections "[Similarity: 0.635]" and "[Similarity: 0.515]" in the documentation).  - **Division method**:   - Anterior layer division: Identify the anterior layer above the ureter, clamp or coagulate and divide it, taking care to protect the ureter.   - Posterior layer division: The posterior layer (also termed the vesicovaginal ligament) contains the superior vesical vein and vesical nerve branches. In Okabayashi surgery, the posterior layer must be carefully dissected, with only the vascular portion (e.g., the superior vesical vein) divided, while the neural portion (vesical nerve branches) is preserved. This is achieved through blunt dissection and selective clamping (refer to section "[Similarity: 0.635]" in the documentation: "Okabayashi divided the vesicouterine ligament into anterior and posterior layers... the posterior layer is also called the vesicovaginal ligament" and section "[Similarity: 0.584]" regarding nerve preservation).  - The overall process emphasizes three-dimensional anatomy, ensuring systematic operation within the spaces to minimize bleeding and nerve injury (refer to section "[Similarity: 0.515]" in the documentation). | B | C | C |
| Chunk size=256, Overlap=100 Using SentenceSplitter | no  In the Okabayashi procedure, the separation and division of the vesicouterine ligament are performed by developing the paravaginal space and dividing the ligament into anterior and posterior layers, as follows: - Separation method:  - First, develop the paravaginal space (located between the vesicovaginal space and the rectovaginal space), and use retractors to pull ventrally to expose the ligament.  - Divide the vesicouterine ligament into an anterior layer (connecting the cervix and bladder, equivalent to the roof of the ureteric tunnel) and a posterior layer (also called the vesicovaginal ligament, connecting the transverse cervical ligament and the bladder, containing the neurovascular bundle). - Division process:  - Anterior layer: Separate the anterior layer with instruments (e.g., Cooper scissors), clamp, divide, and ligate. Anterior layer management is relatively straightforward and often involves exposure of the ureteric tunnel.  - Posterior layer: Widen within the paravaginal space, dissect the posterior layer stump (containing the superior vesical vein and nerves), clamp with double forceps, divide in the middle, and ligate. The document emphasizes that posterior layer handling requires precision to avoid bleeding and may preserve the neural portion (e.g., by dividing only the vascular component). - Key point: This step is unique to the Okabayashi procedure; European and American techniques do not share this approach. The document notes that posterior layer management may offer the possibility of preserving bladder nerves, but the procedure is often complicated by venous rupture.  Document source: Excerpts include "Okabayashi divides the vesicouterine ligament into anterior and posterior layers for separate division" and "The technique involves retracting the vesicovaginal space and paravaginal space each ventrally with retractors, tensioning the vesicovaginal ligament, and dividing it with LigaSure." | C | A | C |
| **Question 111: In the Latzko and Okabayashi operations, what is the key difference in the anatomical definition of the anterior and posterior layers of the vesicouterine ligament?** | | | | |
| Chunk size=512, Overlap=0 Using TokenTextSplitter | in the Latzko and Okabayashi surgical techniques, what are the key anatomical distinctions between the anterior and posterior layers of the vesicouterine ligament?  According to the document content (similarity: 0.541), as compared in Table 15, there are key differences in the definition of the vesicouterine ligament between the Latzko and Okabayashi procedures: - Latzko procedure: Based on traditional European anatomy, the vesicouterine ligament is primarily regarded as the connective band between the transverse cervical ligament and the bladder. However, during surgery, no layered structure is specifically demonstrated. It usually refers to the ureteric roof, without clear differentiation into anterior and posterior layers. For example, the document states: "In Europe and America, the vesicouterine ligament including Latzko’s refers to the ureteric roof in the Wertheim procedure and does not correspond to the posterior layer of Okabayashi’s vesicouterine ligament." - Okabayashi procedure: Okabayashi explicitly divides the vesicouterine ligament into anterior and posterior layers. The anterior layer connects the cervix and the bladder, equivalent to the ureteric roof; the posterior layer is called the vesicovaginal ligament and connects the transverse cervical ligament to the bladder. The document notes: "Okabayashi divides the vesicouterine ligament into anterior and posterior layers. The anterior layer is the ligament connecting the cervix and bladder, equivalent to the ureteric roof in Europe and America. The posterior layer, also called the vesicovaginal ligament, upon careful review of Figures 26 and 27 in 'Radical Hysterectomy for Cervical Cancer,' should refer to the ligament connecting the transverse cervical ligament and the bladder."  Summary of key differences: The Latzko procedure does not stratify the layers; the vesicouterine ligament is mainly equivalent to the ureteric roof. The Okabayashi procedure explicitly stratifies it, with the anterior layer being the ureteric roof and the posterior layer being the vesicovaginal ligament, reflecting a three-dimensional anatomical concept in Okabayashi’s technique. | A | A | A |
| Chunk size=256, Overlap=100 Using SentenceSplitter | In the Latzko and Okabayashi surgical procedures, the key anatomical distinctions between the anterior and posterior layers of the vesicouterine ligament are as follows:  - **Latzko surgery**: The vesicouterine ligament is not explicitly subdivided into anterior and posterior layers. This procedure employs a two-dimensional approach, treating the pelvic connective tissue as a whole without specialized differentiation of the layers. The ligament is considered a continuous structure and is typically transected en bloc via mass ligation (Massenligatur). The focus is on developing the lateral vesical space and the rectal space (cephalic and caudal compartments), but no layered dissection of the ligament is performed (refer to Table 15 and the document excerpt: "Latzko surgery is two-dimensional... extending the site of main ligament transection laterally toward the pelvic sidewall from simple total hysterectomy").  - **Okabayashi surgery**: This procedure uses a three-dimensional approach and explicitly divides the vesicouterine ligament into an anterior leaf and a posterior leaf, which are transected separately. The anterior layer is defined as the roof of the ureteric canal, involving structures superior to the ureter. The posterior layer involves the venous plexus and connective tissue, relevant to nerve preservation. Okabayashi achieves this by developing the lateral vaginal space to separate and cut these layers, enabling potential preservation of bladder innervation. | B | B | B |
| **Question 112: Please briefly describe the specific procedure of the Wertheim operation.** | | | | |
| Chunk size=512, Overlap=0 Using TokenTextSplitter | 1. Division of the round ligaments and the pelvic infundibular ligaments: At the beginning of the operation, these ligaments are divided to gain access to the pelvic cavity.   2. Incision of the uterine broad ligament: The anterior and posterior leaves of the broad ligament are opened.   3. Dissection of the bladder and liberation of the posterior part of the ureter: The bladder is separated and the lower part of the ureter is freed.   4. Liberation of the uterine artery and uterine superficial veins: The index finger is inserted into the ureteral tunnel, the roof of the ureteral canal is lifted upward, and the uterine artery and superficial uterine veins within the tissue superior to the transverse cervical ligament are dissected free (see Figures 71 and 74).   5. Incision of the roof of the ureteral tunnel and liberation of the ureter: The roof of the tunnel is incised, and the middle and anterior (middle and upper) parts of the ureter are freed.   6. Clamping and division of the uterosacral ligament: The first clamp is applied to and the uterosacral ligament is divided.   7. Clamping and division of the rectouterine/vaginal ligament: The second clamp is applied to and this ligament is divided.   8. Clamping and division of the horizontal connective tissue base bundle and the vaginal venous plexus: The third clamp is applied to these structures and they are divided.   9. Division and suturing of the vagina: The vagina is transected and then sutured.   10. Closure of the abdomen: The operation is completed.   The document emphasizes that the Wertheim operation does not employ the concepts of the lateral vesical space or the pararectal space, that the transverse cervical ligament is divided only up to the level of the uterine artery, and that the uterosacral ligament is divided close to the sacrum (similarity: 0.500). This procedure is based on descriptions from 1912 literature and the Peham-Amreich surgical textbook. | B | A | A |
| Chunk size=256, Overlap=100 Using SentenceSplitter | 1. Laparotomy and initial exposure: Perform a midline laparotomy, divide the round ligaments and the infundibulopelvic ligaments, incise the anterior and posterior leaves of the broad ligament, dissect the bladder and free the posterior (lower) segment of the ureter. At this stage, the concepts of the paravesical and pararectal spaces have not yet been introduced.  2. Management of ureters and vessels: Insert the index finger into the ureteric tunnel, elevate the roof of the ureteric tunnel (superficial layer of Mackenrodt’s ligament), dissect around the uterine artery and the superficial uterine vein (the document specifies: "the uterine vein actually refers to the superficial uterine vein"). Then, incise the roof of the ureteric tunnel and dissect the middle and anterior segments of the ureter.  3. Division of the uterosacral ligament: Clamp and divide the uterosacral ligament (first clamp), with emphasis on performing the dissection close to the sacrum.  4. Management of other ligaments: Divide the cardinal ligaments and the rectouterine ligaments, further dissect the bladder, and develop and open the ureteric tunnel.  5. Vaginal and perivaginal tissue management: Develop the paravaginal spaces, divide the anterior layer of the vesicouterine ligament (roof of the ureteric tunnel) to expose the anterior ureter. Then, identify the superior vesical veins and confirm their junction with the uterine deep veins; dissect and divide the uterine branch of the deep uterine vein proximal to its confluence.  6. Vaginal transection: Divide the rectovaginal ligaments and perivaginal tissues, then transect the vagina and suture the vaginal cuff.  7. Closure: Place drains, close the pelvic peritoneum, and close the abdomen.  - The document emphasizes that the radicality of the Wertheim operation is limited: the transverse cervical ligament is divided only up to the level of the uterine artery and ureter, while the uterosacral ligament is divided close to the sacrum (reference: "In the Wertheim operation, the division of the uterosacral ligament is emphasized as a key step", "the division of the transverse cervical ligament is only carried out up to the level of the uterine artery and ureter"). | C | C | C |
| **Question 113: In Sanlin's ultra-radical hysterectomy, which specific blood vessels are involved at the three ligation points of the internal iliac vascular system?** | | | | |
| Chunk size=512, Overlap=0 Using TokenTextSplitter | 1. First ligation (obturator artery and vein): Ligate and divide the obturator artery and vein (obturator vessels).  2. Second ligation (internal iliac artery and vein trunk): After the superior gluteal artery and vein branch, ligate and divide the distal internal iliac artery and vein trunk.  3. Third ligation (inferior gluteal and internal pudendal common trunk): At the inferior margin of the piriformis muscle, ligate and divide the inferior gluteal and internal pudendal common trunk (inferior gluteal and internal pudendal artery and vein) before its branches diverge.   The procedure specifically targets the internal iliac vascular system, including visceral branches (e.g., uterine artery), anterior wall branches (e.g., obturator artery and vein), and posterior wall branches (e.g., superior and inferior gluteal arteries and veins). However, at the third ligation point, the branches supplying the bladder and rectum from the inferior gluteal and internal pudendal common trunk are not addressed. | A | B | A |
| Chunk size=256, Overlap=100 Using SentenceSplitter | no  Based on the document content, Sanlin's ultra-radical total hysterectomy involves three ligation points of the internal iliac vessels, with the specific vessels as follows: 1. First ligation point: Obturator artery and vein. The document explicitly states: "Ligate and divide the obturator artery and vein (first ligation)." 2. Second ligation point: Common trunk of internal iliac artery and vein after branching of inferior gluteal vessels. The document describes: "Ligate and divide the common trunk of internal iliac artery and vein after branching of inferior gluteal vessels (second ligation)." 3. Third ligation point: Upstream of the branching point of the inferior gluteal and internal pudendal common trunk at the inferior piriformis foramen. The document notes: "Ligate and divide the upstream of the branching point of the inferior gluteal and internal pudendal common trunk at the inferior piriformis foramen (third ligation)." - The document also mentions that Sanlin's technique does not adequately account for vascular branches to the bladder and rectum (such as the middle rectal vein), which may lead to issues (reference: "In Sanlin's technique... the bladder and rectal vessels branching from or converging at the inferior gluteal-internal pudendal common trunk are completely disregarded"). | A | A | A |
| **Question 114: What measures are taken in the Meigs' operation to ensure anatomical accuracy and avoid injury to the middle rectal vein?** | | | | |
| Chunk size=512, Overlap=0 Using TokenTextSplitter | to ensure anatomical accuracy and avoid injury to the middle rectal vein during Meigs surgery, the following measures are taken:  - Avoid cutting the base of the cardinal ligament near the sacral surface: Meigs recognized that the middle rectal vein is highly likely to appear near the sacral surface, so cutting at the base of the cardinal ligament (near the sacral surface) is prohibited to prevent injury to the middle rectal vein. - Emphasize anatomical precision: During resection of the transverse cervical ligament, the extent is similar to the level of the uterine deep vein (analogous to Kobayashi’s nerve-sparing surgery). Meigs surgery stresses precise dissection rather than blindly expanding the resection range. The document states, "The resection range of the transverse cervical ligament in Meigs and Kobayashi’s nerve-sparing surgery is similar," and notes that Meigs surgery avoids the potential over-resection seen in Latzko and Okabayashi procedures in an era prioritizing efficacy.  These measures ensure anatomical accuracy in surgery and reduce the risk of complications such as bleeding from middle rectal vein injury. | B | A | A |
| Chunk size=256, Overlap=100 Using SentenceSplitter | What measures does the Meigs surgery employ to ensure anatomical accuracy and avoid injury to the middle rectal vein?  Based on the document content, the Meigs surgery ensures anatomical accuracy and avoids injury to the middle rectal vein through the following measures: - Avoiding division of the main ligament in specific areas: Meigs believed that the main ligament should not be cut near the sacral surface, as the middle rectal vein is highly likely to be present there. He prevents injury to this vein by limiting the depth of resection of the main ligament (document excerpt: "He believed that the main ligament should not be severed near the sacral surface, as the middle rectal vein is highly likely to be present there"). - Emphasizing anatomical precision: The Meigs procedure focuses on precise vascular dissection, avoiding mass ligation (Massenligatur), and instead dissecting and ligating vessels individually to enhance safety. The document states that the Meigs surgery is more accurate anatomically, and compared to the Latzko and Okabayashi procedures, although slightly less radical, it reduces the risk of unexpected bleeding (reference excerpt: "The Meigs procedure is anatomically more precise", "Later comparisons of the Meigs technique with the Latzko and Okabayashi procedures suggested it was slightly less radical, but the author emphasizes the anatomical accuracy of the Meigs surgery"). - Additionally, the Meigs surgery includes complete dissection of the lateral supporting tissue of the ureter, preserving the blood supply to the distal ureter to reduce the risk of fistula formation (document excerpt: "The ureter is completely dissected from the vesicouterine ligament...to preserve some blood supply to the distal ureter"). | A | A | A |
| **Question 115: What are the anatomical features of the cranial compartment of the pararectal space during a radical hysterectomy?** | | | | |
| Chunk size=512, Overlap=0 Using TokenTextSplitter | the anatomical characteristics of the cephalad compartment of the rectal lateral space during radical hysterectomy are as follows:  - **Formation**: The cephalad compartment of the rectal lateral space is formed by dissecting the posterior fascia of the transverse cervical ligament and the internal iliac vascular sheath (with the vascular sheath peeled from the body of the internal iliac vessels), creating a potential space. As defined in Table 15: "the space formed after the posterior fascia of the transverse cervical ligament and the internal iliac vascular sheath are dissected from their respective structures (Latzko rectal lateral space)." - **Location and Function**: Located near the lateral rectal ligament, it is used to expose the origin of the transverse cervical ligament to facilitate surgical maneuvers. It constitutes part of the rectal lateral space excavated in the Latzko technique, with the cephalad compartment and the caudal compartment (formed at the level of the puborectalis muscle fascia) together making up the rectal lateral space. - **Risk**: During dissection, there is a high risk of injuring deep vessels such as the inferior gluteal-internal pudendal common trunk, the inferior vesical vein, or the middle rectal vein, due to the rich vascularity in this region (as noted in similarity: 0.434: "the risk of injuring deep inferior gluteal-internal pudendal common trunk or inferior vesical vein or middle rectal vein is very high"). - **Distinction from Okabayashi Technique**: The dissection approach for the rectal lateral space differs between techniques. In the Okabayashi method, the rectal lateral space is opened medial to the ureter and hypogastric nerve, whereas in the Latzko method, the cephalad compartment is opened lateral to these structures (Table 15).  These anatomical features emphasize the necessity for careful dissection during surgery to avoid hemorrhagic complications. | B | B | B |
| Chunk size=256, Overlap=100 Using SentenceSplitter | the anatomical characteristics of the upper portion (cranial chamber) of the pararectal space vary depending on the surgical approach, as described for the Latzko and Okabayashi techniques:  - In the Latzko technique:  - The upper portion of the pararectal space is a cavity formed by dissecting the posterior fascia of the transverse cervical ligament and the hypogastric vascular sheath away from their respective structures.  - Anatomical feature: It is an artificially created space located posterior to the transverse cervical ligament and anterior to the hypogastric vessels, used to expose and resect the origin of the transverse cervical ligament. The document states: "Upper portion of the pararectal space: the cavity formed after stripping the posterior fascia of the transverse cervical ligament and the hypogastric vascular sheath from their own bases (Latzko pararectal space)."  - Risk: Dissection carries a high risk of injuring deep vessels (such as the inferior gluteal-internal pudendal trunk, inferior vesical vein, or middle rectal vein), leading to bleeding (reference: "Latzko pararectal space... high risk of injuring deep vessels such as the inferior gluteal-internal pudendal common trunk or inferior vesical vein or middle rectal vein").  - In the Okabayashi technique:  - The upper portion of the pararectal space is developed by starting directly below the medial stump of the uterosacral ligament and progressively dissecting loose connective tissue toward the pelvic floor.  - Anatomical feature: It lies between the rectal fascia and the presacral fascia; dissection may extend to the dorsal side of the rectum, posing a risk of injuring the presacral venous plexus. The document notes: "Okabayashi's pararectal space begins directly below the medial cut end of the uterosacral ligament... and is dissected by gradually releasing loose connective tissue toward the pelvic floor."  - Risk: Potential injury to the presacral venous plexus during development.  - General characteristics: The upper portion of the pararectal space is an artificial lateral space (not a natural anatomical structure), created during surgery to expose and separate pelvic connective tissues. The depth of dissection must be carefully controlled to avoid complications (e.g., excessive depth may injure the presacral venous plexus). The document emphasizes that dissection of this space need only proceed far enough to allow resection of the transverse cervical ligament (reference: "Dissection of the pararectal space only needs to be carried out to the extent that the transverse cervical ligament can be resected"). | B | B | B |
| **Question 116: In a nerve-sparing radical hysterectomy, what principles should be followed for the transection of the transverse cervical ligament to avoid en-bloc clamping?** | | | | |
| Chunk size=512, Overlap=0 Using TokenTextSplitter | in nerve-sparing radical hysterectomy, the following principles should be followed when transecting the transverse cervical ligament to avoid mass ligation (Massenligature):  - Separate fascial and vascular components: First transect the fascial part of the transverse cervical ligament (i.e., loose areolar connective tissue), then dissect and cut the vascular component (vessels) individually.  - Avoid mass ligation: Do not clamp and transect the ligament as a whole; instead, separate and cut each vessel individually to minimize nerve injury.  - Use appropriate instruments: Employ an ultrasonic surgical aspirator (USA) for precise dissection, with vibration output power controlled at 30%~50%, suction pressure at 200 mmHg, and irrigation flow at 30~50 mL/min.  - Anatomical awareness: Recognize that the fascia is artificially considered as bundle-like loose areolar connective tissue; handle gently to protect deep autonomic nerves (e.g., pelvic splanchnic nerves).  These principles aim to ensure surgical safety, reduce injury, and preserve bladder and rectal function. | B | B | B |
| Chunk size=256, Overlap=100 Using SentenceSplitter | In nerve-sparing radical hysterectomy, the transection of the transverse cervical ligament should follow the following principles to avoid mass ligation:  - Avoid mass ligation; instead, separate the transverse cervical ligament into its fascial and vascular components. - First, transect the fascial portion, then isolate and cut the vessels of the vascular portion one by one. - Use appropriate instruments such as an ultrasonic scalpel (Figure 77) for precise dissection to minimize injury, depending on the surgical site. - During the procedure, recognize that the fascia is areolar connective tissue and should be treated as a bundle-like structure for separation, not as a whole. These principles aim to preserve the pelvic autonomic nerves (e.g., pelvic plexus and bladder nerve branches) and reduce postoperative bladder dysfunction. | B | B | B |
| **Question 117: Please briefly describe the surgical procedure of a nerve-sparing radical hysterectomy.** | | | | |
| Chunk size=512, Overlap=0 Using TokenTextSplitter | 1. Laparotomy and uterine fixation: Perform laparotomy and fix the position of the uterus.  2. Division of the round ligament: Cut the round ligament to access the pelvic cavity.  3. Incision and dissection of the iliac fossa peritoneum: Expose the retroperitoneal space.  4. Opening of the bladder lateral space: Develop the bladder lateral space without extending to the pelvic floor.  5. Pelvic lymphadenectomy: Sequentially dissect lymph nodes (including external iliac, inguinal, obturator, internal iliac lymph nodes) using ultrasonic energy, with attention to nerve preservation.  6. Opening of the Latzko rectal lateral space: Develop the rectal lateral space to the level of the deep uterine vein.  7. Incision of the bladder peritoneum: Enter the bladder area.  8. Dissection and division of the uterine artery: Thoroughly dissect around the uterine artery, preserving the ureteric branch.  9. Opening of the Gӧrling rectal lateral space: Dissect the posterior ureter to form the ureteric plate.  10. Management of the transverse cervical ligament: Dissect the fascia and cut vessels individually, avoiding en bloc clamping (refer to Question 116).  11. Posterior dissection: Separate the uterosacral ligament and rectouterine ligament.  12. Anterior dissection: Strip the bladder, develop the vaginal lateral space, and divide the vesicouterine ligament.  13. Removal of the uterus and vagina: Excise the uterus and associated tissues while preserving nerves.  14. Closure and reconstruction: Suture the vaginal cuff, close the peritoneum, and prevent adhesions.  The entire procedure emphasizes individual division of ligaments within six spaces (e.g., bladder lateral space, rectal lateral space) to preserve the pelvic nerve plexus and its bladder branches. | B | B | B |
| Chunk size=256, Overlap=100 Using SentenceSplitter | the surgical procedure for nerve-sparing radical hysterectomy is outlined as follows:  1. Abdominal entry and uterine fixation: Make a midline abdominal incision above the pubic symphysis, place retractors to displace bowel loops, and assess intra-abdominal conditions (e.g., cancer progression, ureter course).  2. Division of round ligaments: Cut and ligate the uterine round ligaments.  3. Incision and dissection of iliac fossa peritoneum: Expose pelvic sidewall structures.  4. Development of bladder lateral space: Dissect the space without extending to the superior fascia of the levator ani muscle.  5. Exploration of the ovarian fossa: Investigate the anterior ovarian fossa area.  6. Pelvic lymphadenectomy:   - Sequence includes dissection of external iliac artery sheath, removal of superficial external iliac lymph nodes, inguinal lymph nodes, dissection of external iliac vein sheath, removal of deep external iliac lymph nodes, obturator lymph nodes, internal iliac lymph nodes, and transverse cervical ligament lymph nodes.   - Use of ultrasonic scalpel for dissection to avoid vascular injury.  7. Development of Latzko rectolateral space: Dissect to the level of the deep uterine vein.  8. Management of transverse cervical ligament: Separate ligament fascia, sequentially ligate and cut vessels (avoid mass clamping), and preserve nerve branches.  9. Posterior dissection: Includes development of the Okabayashi rectolateral space, separation of the ureteral tunnel, division of the infundibulopelvic ligament, and dissection of the rectovaginal septum.  10. Anterior dissection: Includes bladder mobilization, ureter liberation anteriorly, and division of the posterior layer of the vesicouterine ligament.  11. Division of deep uterine vein and ligaments: Cut the deep uterine vein before its confluence with the internal iliac vein, and address the rectovaginal and vesicovaginal ligaments.  12. Vaginal transection and cuff closure: Incise paravaginal connective tissue, suture the vaginal cuff, and place a drain.  13. Abdominal closure: Achieve hemostasis and close the abdomen.  This procedure emphasizes systematic anatomical dissection with the goal of preserving the pelvic plexus and bladder nerve branches. | B | B | B |
| **Question 118: During pelvic lymphadenectomy, when dissecting the vascular sheath, which specific technique is explicitly mentioned in the text as not being recommended due to the risk of tearing major blood vessels?** | | | | |
| Chunk size=512, Overlap=0 Using TokenTextSplitter | the method of forcibly dissecting lymph nodes from the medial side is not recommended due to the risk of tearing major vessels such as the internal iliac vein or external iliac vein. | C | C | C |
| Chunk size=256, Overlap=100 Using SentenceSplitter | during pelvic lymphadenectomy, when dissecting the vascular sheath, the method of stripping along the long axis of the vessel is explicitly stated to carry a risk of tearing the main vessels and is therefore not recommended.   Reason:  - This approach may cause the mural venous branches to be avulsed, leading to tearing of the main vessels (such as the external iliac artery and vein).  - The recommended method is: after incising the vascular sheath along the long axis of the vessel, dissect in a direction perpendicular to the vessel, using forceps to stabilize the vascular sheath and cut loose connective tissue to avoid injury. | B | A | A |
| **Question 119: In a nerve-sparing radical hysterectomy, how should metastatic lymph nodes adherent to the external iliac vein be resected? Why is this specific technique necessary?** | | | | |
| Chunk size=512, Overlap=0 Using TokenTextSplitter | How should metastatic lymph nodes attached to the external iliac vein be removed during nerve-sparing radical hysterectomy? Why is this approach necessary?  - **Operational Steps:**   → Use a ureteral hook to lift the external iliac artery upward, exposing the external iliac vein.   → Grasp the fat pad containing the lymph nodes with lymph node forceps and retract it proximally (cephalad).   → Circumferentially dissect the vascular sheath of the external iliac vein, carefully separate adhesions between the lymph nodes and the vein, and then transect at the inguinal region.   → Avoid monopolar electrocautery during the procedure; instead, use scissors or an ultrasonic scalpel for gentle dissection to prevent venous wall injury.   - **Why This Approach Is Necessary:**   → The external iliac vein has a thin wall and is prone to injury; forceful manipulation may lead to venous rupture, hematoma, or accidental bleeding.   → Lymph nodes are closely adherent to the vein (especially in the deep inguinal lymph node region), and circumferential dissection of the vascular sheath ensures complete lymph node removal while reducing the risk of cancer cell dissemination (premature blood flow interruption may increase metastasis risk).   → This approach preserves structures such as the obturator nerve, adhering to the principle of nerve-sparing surgery. | A | B | B |
| Chunk size=256, Overlap=100 Using SentenceSplitter | when removing metastatic lymph nodes attached to the external iliac vein during a nerve-sparing radical hysterectomy, the procedure should be performed as follows:  - **Procedure**:   - Use an ultrasonic scalpel and fine scissors to perform sharp or blunt dissection, gradually separating the lymph node from surrounding tissues.   - Protect the vein wall with fingertips while carefully fragmenting and dissecting the connective tissue between the lymph node and the vein.   - Prepare Satinsky vascular clamps, vascular tapes, and suturing instruments to manage potential vascular injury.  - **Rationale for this approach**:   - Cancer rarely infiltrates the vein wall, so meticulous dissection allows safe removal of the lymph node without unnecessary abandonment.   - This method minimizes the risk of vascular injury (e.g., tearing or bleeding), ensures radical oncological goals, and the use of an ultrasonic scalpel enhances safety (note: avoid ultrasonic damage to the vessel).   - The literature emphasizes that metastatic lymph nodes are typically fixed to the vascular sheath but can be completely resected through careful dissection without premature abandonment (similarity: 0.411). | A | A | A |
| **Question 120: During the lymph node dissection phase of a nerve-sparing radical hysterectomy, at what stage of the operation should the sheath of the internal iliac artery and vein be dissected?** | | | | |
| Chunk size=512, Overlap=0 Using TokenTextSplitter | when performing lymph node dissection during a nerve-sparing radical hysterectomy, the stripping of the internal iliac artery and vein sheath should be carried out:  - During the dissection of the internal iliac lymph nodes, specifically at step 6 of the lymph node dissection sequence. The document explicitly states: “The stripping of the internal iliac artery vascular sheath begins when dissecting the internal iliac lymph nodes.”  - Operational details: Make an incision on the ventral side of the arterial sheath and advance the dissection distally to the level of the umbilical ligament branch. Simultaneously, dissect the deep venous sheath of the internal iliac vein to expose the Latzko rectal lateral space.  - Timing: Within the overall sequence of pelvic lymph node dissection, internal iliac lymph node dissection follows obturator lymph node dissection (order: external iliac lymph nodes → inguinal lymph nodes → obturator lymph nodes → internal iliac lymph nodes). Stripping the vascular sheath is a key step in internal iliac lymph node dissection, aimed at safely removing lymph nodes and minimizing bleeding risk. | B | B | B |
| Chunk size=256, Overlap=100 Using SentenceSplitter | during the lymph node dissection in a nerve-sparing radical hysterectomy, the stripping of the internal iliac artery and vein sheath should be performed when dissecting the internal iliac lymph nodes.  The specific sequence is as follows:  - Lymph node dissection order: stripping of the external iliac artery sheath (dissection of superficial external iliac lymph nodes) → dissection of inguinal lymph nodes → stripping of the external iliac vein sheath (dissection of deep external iliac lymph nodes) → dissection of obturator lymph nodes → dissection of internal iliac lymph nodes (at which point the internal iliac artery and vein sheath is stripped) → dissection of transverse cervical ligament lymph nodes, etc.  - The stripping procedure should be carried out under good visual field conditions; avoid changing direction when exposing vessels at the same depth to reserve space for repair (similarity: 0.434).  - This step is a core part of lymph node dissection, aimed at thoroughly removing metastatic lymph nodes while preserving neural structures. | B | B | B |
| **Question 121: Why is laparoscopy the preferred approach for para-aortic lymphadenectomy?** | | | | |
| Chunk size=512, Overlap=0 Using TokenTextSplitter | why is laparoscopy preferred for para-aortic lymph node dissection?  No answer found in the knowledge base. | D | D | D |
| Chunk size=256, Overlap=100 Using SentenceSplitter | no answer found in the knowledge base. | D | D | D |
| **Question 122: In a nerve-sparing radical hysterectomy, what is the primary purpose of developing Latzko's pararectal space?** | | | | |
| Chunk size=512, Overlap=0 Using TokenTextSplitter | the main purpose of dissecting the Latzko rectal lateral space during nerve-sparing radical hysterectomy is to expose and divide the origin of the transverse cervical ligament, facilitating thorough dissection of its vascular branches while avoiding nerve injury, and providing a safe pathway for subsequent procedures such as separation of the uterine deep veins.  based on the document details: - in the [similarity: 0.590] section, it states: “dissecting the Latzko rectal lateral space... is advantageous for exposing and dividing the origin of the transverse cervical ligament.” - in the [similarity: 0.548] section, it further explains: “the purpose of dissecting the Latzko rectal lateral space... is to individually expose the vascular branches within the transverse cervical ligament... to avoid mass ligation (Massengigatur).” - in the [similarity: 0.508] section, it emphasizes: “the introduction of the Latzko technique aims to dissect the Latzko rectal lateral space and the bladder lateral space, fully exposing the origin of the transverse cervical ligament, thereby enabling more thorough dissection at this site.”  in summary, the document clearly indicates that the core objective of dissecting the Latzko rectal lateral space is to expose the origin of the transverse cervical ligament, enabling precise management of vessels (e.g., uterine deep veins) and supporting nerve-sparing surgical strategies (e.g., avoiding injury to the pelvic splanchnic nerves). | A | A | A |
| Chunk size=256, Overlap=100 Using SentenceSplitter | the main purpose of dissecting the Latzko rectal lateral space during a nerve-sparing radical hysterectomy is to fully expose the origin of the transverse cervical ligament, enabling more thorough dissection in this area while avoiding injury to critical structures such as the sacral venous plexus. This facilitates systematic surgical steps in nerve-sparing procedures and reduces the risk of complications.  - Key evidence:  - Document excerpt [similarity: 0.563] states: “The introduction of the Latzko technique aims to dissect the Latzko rectal lateral space and the bladder lateral space, fully exposing the origin of the transverse cervical ligament, thereby allowing more thorough dissection in this region.”  - Excerpt [similarity: 0.545] notes: “By exploring the cranial compartment of the Latzko rectal lateral space, the origin of the transverse cervical ligament can be exposed.”  - Excerpt [similarity: 0.569] emphasizes: Dissecting the Latzko rectal lateral space helps prevent injury to the sacral venous plexus and the common trunk of the inferior gluteal and pudendal nerves, which is critical for accident prevention.  Answer: The main purpose of dissecting the Latzko rectal lateral space is to fully expose the origin of the transverse cervical ligament for thorough dissection and to reduce surgical risks such as bleeding or nerve injury. | A | A | A |
| **Question 123: According to Okabayashi's technique, what three-dimensional geometric structure is formed by the posterior layer of the vesicouterine ligament, the lateral border of the cervix, and the lateral border of the bladder? Compared to the two-dimensional planar understanding of Kobayashi and Mahigara, what is the key difference of this three-dimensional structure?** | | | | |
| Chunk size=512, Overlap=0 Using TokenTextSplitter | according to the Okabayashi method, the posterior layer of the vesicouterine ligament, the lateral margin of the uterine cervix, and the lateral margin of the bladder together form a three-dimensional geometric structure resembling a vertical connective tissue bundle connecting the transverse cervical ligament and the bladder, constituting a neurovascular complex (including the superior vesical vein and vesical nerve branches). Compared to the two-dimensional planar understanding of Kobayashi and Makabe, the key distinction lies in the Okabayashi method's emphasis on three-dimensional spatial relationships (such as the multi-directional extension and folding of the ligament), whereas Kobayashi and Makabe's descriptions are simplified planar models (e.g., roof-like or sandwich-like layering).  based on document details: - three-dimensional geometric form: in the [similarity: 0.490] section, it is described: "Okabayashi divides the vesicouterine ligament into anterior and posterior layers... the posterior layer is also called the vesicovaginal ligament... it should refer to the ligament connecting the transverse cervical ligament and the bladder." in the [similarity: 0.477] section, it is supplemented: "the posterior layer of the vesicouterine ligament... is a connective tissue bundle linking the transverse cervical ligament and the bladder," forming a vertical or oblique three-dimensional structure involving the three-dimensional course of neurovascular bundles (such as the superior vesical vein and vesical nerve branches). - comparison with Kobayashi and Makabe's two-dimensional understanding:  - Kobayashi method: in the [similarity: 0.490] section, described as "covering the ureter like the roof of a house," a two-dimensional planar covering model simplifying the structure to a single or double layer.  - Makabe method: in the [similarity: 0.490] section, described as "sandwiching the ureter like a sandwich," also a two-dimensional planar layered model emphasizing anterior-posterior relations without three-dimensional depth.  - key distinction: the Okabayashi method's three-dimensional form is more complex, involving multi-directional connections (e.g., cephalocaudal, ventrodorsal), facilitating intraoperative separation of nerves and vessels; whereas Kobayashi and Makabe's two-dimensional models ignore depth and folding relationships, potentially leading to imprecise nerve preservation or increased risk of injury during surgery. the document summarizes in the [similarity: 0.590] section: "the Okabayashi method is three-dimensional... clarifying their stereoscopic structure with the transverse cervical ligament," highlighting this distinction. | B | B | B |
| Chunk size=256, Overlap=100 Using SentenceSplitter | In the Okabayashi technique, the posterior layer of the vesicouterine ligament, the lateral margin of the uterine cervix, and the lateral margin of the bladder together form a three-dimensional geometric structure. This structure involves multiple spaces (such as the paravaginal space and the paravesical space) and the layered arrangement of ligaments, creating a complex, network-like or composite geometric body. Compared to the two-dimensional planar understanding of Kobayashi and Magara, the key distinction lies in the Okabayashi technique's emphasis on depth and layered separation (three-dimensional), whereas Kobayashi and Magara describe flat, parallel attachments (two-dimensional) that lack three-dimensionality.  - Three-dimensional geometric morphology:  - Document excerpt [similarity: 0.546] describes the Okabayashi technique as "three-dimensional," involving the dissection of the paravaginal and paravesical spaces, separation of the anterior and posterior layers of the vesicouterine ligament, and clarification of their stereoscopic relationship with the transverse cervical ligament.  - Excerpt [similarity: 0.522] states: The Okabayashi technique forms "a septum composed of two layers of visceral fascia" through space dissection, with the ureter and nerves situated between the layers, constituting a stereoscopic framework.  - Specific morphology: The posterior layer of the vesicouterine ligament connects the transverse cervical ligament and the bladder, forming an interlaced three-dimensional space with the lateral margin of the uterine cervix and the lateral margin of the bladder, involving layered and independent handling of ligaments (as described in excerpt [similarity: 0.516]).  - Key distinction:  - Okabayashi technique (three-dimensional): Emphasizes anatomical layers and depth, with clear stratification of ligaments (anterior and posterior layers), and operations based on dissected spaces (e.g., paravaginal space), establishing stereoscopic geometric relationships.  - Kobayashi and Magara (two-dimensional): Kobayashi describes it as "like a civilian house roof" covering the ureter (excerpt [similarity: 0.518]), and Magara describes it as "sandwich-like,夹着 the ureter" with parallel attachment to the lateral aspect of the uterine cervix/vagina (excerpt [similarity: 0.518]), lacking the concept of depth and representing planar attachments.  - Core difference: The Okabayashi technique allows for more precise nerve preservation and vascular management, while the two-dimensional understanding may lead to unsystematic procedures and increased risk of injury due to its lack of three-dimensionality (excerpt [similarity: 0.518] notes that the two-dimensional description "lacks stereoscopic quality").  Summary: In the Okabayashi technique, these structures collectively constitute a three-dimensional geometric morphology involving ligament stratification and interlaced spatial relationships (e.g., septum-like network). Compared to the two-dimensional planar understanding of Kobayashi (roof-like) and Magara (sandwich-like), the key distinction is that Okabayashi emphasizes depth and layering (three-dimensional stereoscopic structure), while Kobayashi and Magara's descriptions are flat, parallel attachments lacking three-dimensionality, affecting surgical precision and nerve preservation outcomes. | B | A | B |
| **Question 124: What are the anatomical features of the anterior and posterior layers of the vesicouterine ligament? How should the anterior and posterior layers of the vesicouterine ligament be separated?** | | | | |
| Chunk size=512, Overlap=0 Using TokenTextSplitter | anatomical characteristics: - anterior layer: connects the cervix uteri to the bladder, equivalent to the ureteric roof in Western anatomy; it is thin in structure and covers the ureter, with underlying vessels often visible through the tissue. - posterior layer: also known as the vesicovaginal ligament, connects the transverse cervical ligament to the bladder; it is thicker in structure and contains the neurovascular bundle (including the superior vesical vein and vesical nerve branches), closely related to the pelvic plexus.  separation method (following the Okabayashi technique): 1. separate the anterior layer first by identifying and dissecting the entrance of the ureteric tunnel to expose the ureter. 2. then separate the posterior layer by extending the paravesical space laterally along the vaginal side, carefully managing the neurovascular bundle to avoid blind clamping or injury to the venous plexus and nerve branches.  the sequence is critical: anterior layer dissection precedes posterior layer dissection to minimize the risk of ureteric or neural damage. | A | A | A |
| Chunk size=256, Overlap=100 Using SentenceSplitter | The anatomical characteristics of the anterior and posterior layers of the vesicouterine ligament are as follows:  - Anterior layer: Connects the cervix and the bladder, equivalent to the "top of the ureteral tunnel"; it is relatively thin.  - Posterior layer: Connects the transverse cervical ligament and the bladder; it is a connective tissue bundle containing the neurovascular bundle (e.g., superior vesical vein and vesical nerve branches) and has a more complex structure.  - Overall: The two layers form a composite structure, with the posterior layer being particularly critical for nerve preservation.   The method for separating the anterior and posterior layers of the vesicouterine ligament is:  - Steps: First, develop the paravesical space, then insert Cooper scissors into the space to expand it, dissect free the posterior layer remnant, and finally clamp and cut it.  - Note: The procedure requires meticulous technique to avoid venous bleeding.   Response: Anatomically, the anterior layer connects the cervix and bladder (similar to the top of the ureteral tunnel), while the posterior layer connects the transverse cervical ligament and bladder (containing the neurovascular bundle). For separation, first develop the paravesical space, use Cooper scissors to expand the space, dissect free the posterior layer remnant, then clamp and cut it. | A | B | A |
| **Question 125: When transecting the deep uterine vein, what is the significance of the rectouterine ligament as an anatomical landmark?** | | | | |
| Chunk size=512, Overlap=0 Using TokenTextSplitter | as an anatomical landmark, the rectouterine ligament plays a role in localization and guidance during the incision of the uterine deep vein. it helps identify the attachment point of the uterine deep vein, avoids accidental injury to surrounding venous plexuses (such as the middle rectal vein or the sacral venous plexus), and ensures precise dissection to preserve neural structures.  based on document details: - in the [similarity: 0.535] section: “the uterine deep vein attaches to the lateral rectouterine ligament... dissecting the rectouterine ligament can expose the uterine deep vein.” - in the [similarity: 0.548] section: “the uterine deep vein is near the rectouterine ligament... serving as a landmark, it aids in identifying the vein’s position intraoperatively to prevent unexpected bleeding.” - in the [similarity: 0.531] section: “when incising the uterine deep vein, the rectouterine ligament is a key reference point to avoid damaging the inferior gluteal-pudendal common trunk or the pelvic plexus.”  in summary, the rectouterine ligament as an anatomical landmark ensures that surgery on the uterine deep vein is performed safely and accurately, reducing the risk of complications. | A | A | A |
| Chunk size=256, Overlap=100 Using SentenceSplitter | when performing deep uterine vein dissection, the rectouterine ligament serves as an anatomical landmark to indicate the depth and position of the dissection, helps regulate the extent of the cut (such as the lower boundary) to avoid injuring nerves (e.g., the hypogastric nerve), and ensures the procedure is conducted within a safe zone.  - Key evidence:  - Document fragment [similarity: 0.542] states: “The extent of dissection of the rectouterine ligament can be adjusted at a deeper level within the excavated Okabayashi lateral rectal space. At this point, the hypogastric nerve must be dissected free.” This demonstrates the ligament’s role as a depth reference point.  - Figure 135 in fragment [similarity: 0.542] describes: During deep uterine vein dissection, the rectouterine ligament aids in localization, ensuring the dissection does not extend beyond the lower margin of the deep uterine vein (to avoid injury to the pelvic plexus nerve).  - Significance: The ligament acts as a landmark to assist navigation in complex anatomy, especially when dealing with dorsal vessels of the deep uterine vein (fragment [similarity: 0.546] notes dorsal vessels exist and require careful handling).  Summary: The rectouterine ligament serves as an anatomical landmark during deep uterine vein dissection, guiding depth and position, helping control the operative field (e.g., lower margin limits), and ensuring the hypogastric nerve is dissected to prevent injury. | A | A | A |
| **Question 126: In gynecologic surgery, how can the rectovaginal ligament be correctly identified and transected to avoid injury to the pelvic plexus?** | | | | |
| Chunk size=512, Overlap=0 Using TokenTextSplitter | during gynecological surgery, how to correctly identify and divide the rectovaginal ligament to avoid injury to the pelvic nerve plexus?  in the document, the identification and division of the rectovaginal ligament is a key step in radical hysterectomy to avoid injury to the pelvic nerve plexus (i.e., the pelvic autonomic nerves). the document emphasizes protecting the nerves through anatomical dissection, with specific methods as follows:  - identification location: the rectovaginal ligament is located directly below (dorsal side) the point where the uterine branch of the deep uterine vein is divided, corresponding to the position of the second clamp in the Wertheim operation. during the procedure, after opening the lateral vesicouterine space and the rectal lateral cavity, the area is localized by clamping (refer to [similarity: 0.529] segment). - method to avoid nerve injury: adopt nerve-sparing technique, separating the vascular portion from the neural portion. specific steps include:  - between the transverse cervical ligament and the posterior layer of the vesicouterine ligament, identify the vascular-nerve triangle (composed of loose connective tissue).  - separate the main ligament vascular bundle from the deep autonomic nerves, cutting only the vascular portion while preserving the neural portion. this is achieved through meticulous dissection, such as using an ultrasonic scalpel to assist separation, avoiding mass ligation (Massengigatur), to reduce injury to the nerve plexus (refer to [similarity: 0.452] segment).  - during division, avoid excessive traction or blind clamping to prevent nerve injury. the document states that nerve-sparing surgery requires intraoperative visualization of the ureter and pelvic autonomic nerve course to ensure the procedure is performed under direct vision (refer to [similarity: 0.452] segment).  in summary, correct identification relies on anatomical landmarks (such as the deep uterine vein position), and division employs a separation technique targeting only the vascular part to protect the pelvic nerve plexus. | C | C | C |
| Chunk size=256, Overlap=100 Using SentenceSplitter | no answer found in the knowledge base.   In gynecological surgery, how to correctly identify and dissect the rectovaginal ligament to avoid injury to the pelvic nerve plexus?   The documents mention the rectovaginal ligament multiple times (e.g., in "dissection of the rectovaginal ligament and vesicovaginal ligament" and "dissection and incision of the uterosacral ligament and rectouterine ligament"), but do not provide specific procedural steps for identifying and dissecting this ligament to avoid damage to the pelvic nerve plexus. The documents discuss the concept of nerve-sparing surgery (such as "considering surgical approach with nerve preservation"), but do not detail practical techniques for localizing the ligament or avoiding nerve injury during dissection. | D | D | D |
| **Question 127: What are the specific surgical steps of the Davydov procedure for suturing the vaginal cuff?** | | | | |
| Chunk size=512, Overlap=0 Using TokenTextSplitter | no answer found in the knowledge base. | D | D | D |
| Chunk size=256, Overlap=100 Using SentenceSplitter | 1. Suture the bladder peritoneum to the anterior vaginal wall: Perform interrupted sutures between the bladder peritoneum and the anterior vaginal wall stump.  2. Suture the rectal serosa to the posterior vaginal wall: Similarly, use interrupted sutures to connect the peritoneum of the Douglas pouch (rectal serosa) with the posterior vaginal wall stump.  3. Suture the bladder peritoneum and rectal serosa: At the midportion, suture the bladder peritoneum and rectal serosa to each other to close the stump and maintain vaginal length.   The method helps predict and preserve vaginal length and may be combined with the use of absorbable sutures (e.g., "continuous suturing with absorbable thread for vaginal repair"). Note: This technique is cited from "Endo's surgical text," but no further detailed illustrations or variants are provided. | A | A | A |
| **Question 128: Please briefly describe the surgical procedure of a modified radical hysterectomy.** | | | | |
| Chunk size=512, Overlap=0 Using TokenTextSplitter | Brief description of the surgical procedure for subradical hysterectomy:  1. Laparotomy: Enter the abdominal cavity and fixate the uterus. 2. Transection of the round ligament of the uterus: Clamp, cut, and ligate at its midportion. 3. Incision of the iliac fossa peritoneum: Expose pelvic structures to facilitate subsequent procedures. 4. Opening of the paravesical space: Develop the space without extending deep to the superior fascia of the levator ani muscle. 5. Pelvic lymphadenectomy: Prioritize removal of anterior lymph nodes, with emphasis on the obturator, internal iliac, and cardinal ligament nodes. Pay special attention to clearance at the junction of the obturator vessels and internal iliac vessels (due to involvement in deep uterine venous drainage). 6. Opening of Latzko's pararectal space: Develop up to the level of the deep uterine vein. 7. Incision of the vesicouterine peritoneum: Separate the bladder for subsequent manipulation. 8. Isolation and transection of the uterine artery: Transect after thorough clearance of surrounding tissues, preserving the ureteral branch if possible. 9. Opening of Okabayashi's pararectal space: Separate the posterior ureter to form the ureteral plate. 10. Subsequent steps: Include transection of the infundibulopelvic ligament, incision of the Douglas pouch peritoneum, separation of the rectovaginal septum, transection of the uterosacral and rectouterine ligaments, bladder detachment, vaginal transection, and suturing.  The key to this procedure lies in limiting the resection range: the transection of the deep uterine vein is performed medial to its confluence with the superior vesical vein, and the depth of cardinal ligament transection is only to the level of the uterine artery to preserve more tissue. | A | A | A |
| Chunk size=256, Overlap=100 Using SentenceSplitter | 1. Abdominal incision: Make a midline incision in the abdominal wall above the pubic symphysis to enter the peritoneal cavity.  2. Division of the round ligament: Clamp and divide the round ligament at its midpoint, then ligate it with suture.  3. Incision of the iliac fossa peritoneum: Cut open the anterior leaf of the broad ligament at the pelvic brim to expose the operative field.  4. Development of the bladder lateral space: Dissect the lateral bladder space without extending to the bottom (above the levator ani fascia).  5. Pelvic lymph node dissection: Prioritize removal of anterior lymph nodes, with emphasis on obturator, internal iliac, and cardinal ligament nodes (note: the area near the confluence of the obturator vessels into the internal iliac vessels is critical due to involvement with deep uterine venous drainage).  6. Development of the Latzko rectal lateral space: Dissect the rectal lateral space up to the level of the deep uterine vein.  7. Incision of the bladder peritoneal reflection: Separate and manage the peritoneal reflection over the bladder.  8. Isolation and division of the uterine artery: After thorough dissection around the uterine artery, divide it (the ureteric branch may be preserved).  9. Development of the Köckherdt rectal lateral space: Dissect the posterior ureter to form the ureteric plate.  10. Vaginal management and closure: Resect the upper 1/3 of the vagina (approximately 1/3 in length), transect the vagina horizontally, and suture the stump (using absorbable suture).  11. Abdominal closure and drainage: Place a drain (e.g., T-tube) and close the abdomen routinely.   The procedure involves resection of half the cardinal ligament and the upper 1/3 of the vagina, combined with selective pelvic lymphadenectomy (e.g., lymph nodes below the common iliac artery, external iliac, and obturator regions), but does not involve deep handling of the uterine vein (“the division of the deep uterine vein is performed medial to the confluence of the superior vesical vein”). | A | B | A |
| **Question 129: For patients with Stage III cervical cancer extending to the pelvic sidewall, what is the principle for managing the internal iliac vascular system in Sanlin's technique?** | | | | |
| Chunk size=512, Overlap=0 Using TokenTextSplitter | for patients with stage III cervical cancer with lateral pelvic wall extension, the vascular management principles of the pelvic internal artery and vein system in the Sanlin procedure (ultra-radical hysterectomy) are complete extirpation to ensure radical resection of cancer-infiltrated tissues. The principles are based on the anatomical vascular system and stepwise ligation:  - vascular system composition: the pelvic internal artery and vein system includes visceral branches (e.g., uterine artery, vesical vessels, middle rectal vessels), anterior wall branches (e.g., umbilical artery, obturator vessels, internal pudendal vessels), and posterior wall branches (e.g., iliolumbar vessels, lateral sacral vessels, superior and inferior gluteal vessels) (reference: similarity 0.529). - management principles:  - first ligation: ligate and divide the obturator vessels (anterior wall branch).  - second ligation: after the branching of the superior gluteal vessels, ligate and divide the main trunk of the internal iliac vessels downstream.  - third ligation: before branching of the inferior gluteal and internal pudendal common trunk (at the infrapiriform foramen), ligate and divide the vessels in this segment to ensure complete extirpation of the pelvic internal artery and vein system from below the superior gluteal vein branch to the Alcock’s canal (reference: similarity 0.529 and 0.427). - intent: complete extirpation of the cardinal ligament along with the internal iliac vascular trunk to address lateral pelvic wall extension and avoid residual cancer cells. however, the document notes that this approach does not address the visceral branches to the bladder and rectum, which may lead to inconsistency (reference: similarity 0.427).  in summary, the principle is three-step ligation at key vascular points to achieve total extirpation of the pelvic internal artery and vein system. | B | A | A |
| Chunk size=256, Overlap=100 Using SentenceSplitter | For patients with stage III cervical cancer spreading to the pelvic sidewall, the vascular management principles of the Sanlin technique (ultra-radical hysterectomy) for the internal iliac artery and vein are as follows, based on the described three-step ligation and division to achieve complete resection of the internal iliac vascular trunk and pelvic sidewall removal:  1. First ligation (obturator vessels): Ligate and divide the obturator artery and vein (located in the obturator region) first.  2. Second ligation (internal iliac trunk): Immediately after the superior gluteal artery and vein branch off, ligate and divide the downstream internal iliac vascular trunk (ensuring the resection is distal to the deep uterine venous drainage into the internal iliac vein).  3. Third ligation (inferior gluteal and internal pudendal common trunk): At the inferior margin of the piriformis muscle, before branching of the inferior gluteal and internal pudendal artery and vein common trunk, perform combined ligation and division.   The method requires "systematic anatomical knowledge, extensive experience, and high-level technical skill," emphasizing that resection of the internal iliac vessels occurs "distal to the deep uterine vein drainage into the internal iliac vein" (i.e., between the superior gluteal vein branching point and the inferior gluteal/internal pudendal vessel branching point). The goal is to extend resection to the pelvic sidewall; however, the document also notes this approach carries high risk and involves anatomical contradictions ("there are anatomical contradictions in Sanlin's concept"), requiring cautious execution. | A | B | A |
| **Question 130: What are the major tributaries of the great saphenous vein near the saphenous opening?** | | | | |
| Chunk size=512, Overlap=0 Using TokenTextSplitter | the main tributaries of the great saphenous vein near the saphenous opening include:  1. Superficial epigastric vein → drains into the great saphenous vein 2. Superficial circumflex iliac vein → drains into the great saphenous vein 3. External pudendal vein (anterior and posterior branches) → drains into the great saphenous vein 4. Deep external pudendal vein → drains into the great saphenous vein 5. Medial superficial femoral vein → drains into the great saphenous vein 6. Lateral superficial femoral vein → drains into the great saphenous vein 7. Anterior superficial femoral vein → drains into the great saphenous vein 8. Posterior superficial femoral vein → drains into the great saphenous vein 9. Saphenous vein → itself, at the saphenous opening  Note: The provided document discusses pelvic vascular anatomy relevant to gynecological surgery (e.g., internal iliac vessels, uterine vessels) and does not contain information on lower limb venous structures such as the great saphenous vein or its tributaries. The above list is based on standard anatomical knowledge. | D | D | D |
| Chunk size=256, Overlap=100 Using SentenceSplitter | the main tributaries of the great saphenous vein near the saphenous opening include:  - Superficial epigastric vein  - Superficial circumflex iliac vein  - External pudendal vein (anterior and posterior branches)  - Deep external pudendal vein  - Medial superficial femoral vein  - Lateral superficial femoral vein  - Anterior and posterior branches of the great saphenous vein itself  - Superficial accessory saphenous vein (if present)  Note: The provided document focuses on pelvic vascular anatomy relevant to gynecological surgery and does not contain information on the saphenous opening or great saphenous vein tributaries. The above translation is based on standard anatomical knowledge to fulfill the complete translation requirement. | D | D | D |
| **Question 131: When dissecting the internal iliac vascular system to manage the posterior trunk branches, ligation should be performed on the parietal pelvic veins proximal to their confluence with the superior gluteal vein. What is the anatomical reason behind this surgical strategy?** | | | | |
| Chunk size=512, Overlap=0 Using TokenTextSplitter | the anatomical rationale for this surgical strategy is that the internal iliac vascular system, particularly its posterior division (including the superior gluteal vein and its deeper tributaries such as those emerging from the sacral foramina), is a major source of life-threatening hemorrhage in gynecologic oncology procedures due to its deep pelvic location, rich vascular network, and proximity to critical structures like the sacral plexus and ureters. ligating at the proximal side where the parietal pelvic veins join the superior gluteal vein allows for preemptive control of venous outflow before entering the high-risk dissection zone, thereby minimizing the risk of inadvertent vessel injury during manipulation, reducing bleeding that could obscure the surgical field, and preventing potential damage to adjacent nerves or the ureter. this approach is specifically designed based on the anatomical vulnerability of the sacral venous plexus and its tributaries to enhance surgical safety.  (Source: Document fragments [similarity: 0.433] and [similarity: 0.381]) | A | B | A |
| Chunk size=256, Overlap=100 Using SentenceSplitter | the anatomical reason behind this surgical strategy is to prevent ischemic complications in the buttock and sciatic nerve regions. according to the document: "when performing bilateral internal iliac artery ligation for hemorrhage control, the ligation should be placed distal to the posterior branches; ligation at a higher level may cause local ischemic symptoms in the buttock and sciatic nerve." the posterior trunk branches of the internal iliac vessels, such as the superior gluteal vein, supply blood to the buttock and sciatic nerve area. if ligation is performed too proximally (i.e., proximal to the junction where the parietal veins drain into the superior gluteal vein), it may interrupt blood flow to these critical regions, leading to ischemic injury. therefore, ligation should be performed distal to the junction of the parietal veins and the superior gluteal vein to preserve blood flow through the superior gluteal vein and prevent complications. | C | C | C |
| **Question 132: What are the common surgical positions for gynecologic oncology surgery?** | | | | |
| Chunk size=512, Overlap=0 Using TokenTextSplitter | the common body positions for gynecological tumor surgery include:  - **Supine position**: The standard position for most abdominal surgeries; the patient lies flat with both iliac crests parallel and extending beyond the upper half of the operating table to expand the pelvis, facilitating pelvic manipulation. - **Trendelenburg position (head-low supine)**: Used in laparoscopic surgery to provide optimal pelvic exposure; gravity shifts the small and large intestines upward, reducing interference with the pelvic cavity. - **Lithotomy position**: Commonly used for perineal or vaginal surgeries to ensure good perineal exposure; divided into high and low lithotomy positions. Caution is required to avoid thigh flexion exceeding 90° to prevent nerve injury (e.g., femoral or sciatic nerve), and legs should be padded with soft cloth to avoid compression.  Additionally, special adjustments are noted: for obese patients, a sponge pad or long pillow may be placed under the lumbosacral area to slightly elevate the posterior pelvis and lower the thighs, thereby widening the pelvic inlet plane and increasing the distance from the umbilicus to the pubis, facilitating deep surgical manipulation.  (Source: Document excerpt [Similarity: 0.467]) | B | A | A |
| Chunk size=256, Overlap=100 Using SentenceSplitter | the common positions for gynecologic oncology surgery include:  - Supine position (hyperextended): Used for most abdominal surgeries, with the patient lying supine and both iliac crests extended beyond the upper edge of the operating table to expand the pelvic inlet, facilitating exposure of the lower abdomen and deep pelvis. For obese patients, a sponge pad or long pillow may be placed under the lumbosacral area to further widen the pelvic inlet.  - Trendelenburg supine position: Employed in laparoscopic surgery, using gravity to displace the small and large intestines upward, providing optimal pelvic exposure.  - Lithotomy position: Frequently used for procedures requiring perineal exposure, such as vaginal or laparoscopic operations. The height of the lithotomy position is adjustable, with high and low lithotomy being most commonly used to facilitate the surgeon and assistant’s maneuvers.   Source: "During gynecologic oncology surgery, patient positioning is critical... Most gynecologic oncology surgeries are performed abdominally, with patients routinely placed in the supine position... Another position is the Trendelenburg supine position... A third position is the lithotomy position." | A | A | A |
| **Question 133: What laboratory tests should be performed before gynecologic oncology surgery? How should abnormal results be managed?** | | | | |
| Chunk size=512, Overlap=0 Using TokenTextSplitter | what laboratory tests should be performed before gynecological tumor surgery? how should abnormal indicators be managed?  - Laboratory tests:  - Routine tests: complete blood count (CBC), urinalysis, stool routine (the three routine tests).  - Blood biochemistry: liver function (e.g., transaminases, bilirubin), renal function (blood urea nitrogen, serum creatinine), electrolytes (potassium, sodium, etc.), blood glucose, coagulation function (prothrombin time).  - Cardiopulmonary function: electrocardiogram (ECG), blood gas analysis (e.g., arterial partial pressure of oxygen PaO₂, mixed venous partial pressure of oxygen PVO₂).  - Other targeted examinations: based on tumor type and symptoms, may include chest X-ray (to rule out lung metastasis), intravenous pyelogram (to assess urinary tract obstruction), CT/MRI (to evaluate lymph node metastasis), PET (for difficult cases), and cystoscopy or fiberoptic colonoscopy when indicated. - Management of abnormal indicators:  - Anemia or low serum albumin: transfuse to correct hemoglobin; high-nutrition therapy to supplement protein and calories (3200 kcal/day).  - Electrolyte imbalance: for hypokalemia (serum potassium < 3.5 mmol/L), administer oral 10% potassium chloride solution 10–20 mL three times daily; for hyponatremia, restore normal salt intake.  - Diabetes: if blood glucose > 13.9 mmol/L, use short-acting insulin to control to < 2.8 mmol/L; adjust diet preoperatively to avoid hypoglycemia.  - Cardiopulmonary abnormalities: for hypoxemia (PaO₂ < 60 mmHg), correct fluid and electrolyte balance, use medications such as atropine if necessary; postpone surgery until correction of acidosis.  - Infection or inflammation: if leukocytosis is present, initiate antibiotics early (e.g., start 2 days in advance if infection is suspected). The document emphasizes that comprehensive assessment and correction of abnormalities must be completed preoperatively to reduce surgical risk. (source: document excerpts [similarity: 0.398], [similarity: 0.402], [similarity: 0.404]) | B | B | B |
| Chunk size=256, Overlap=100 Using SentenceSplitter | what laboratory tests should be performed before gynecological tumor surgery? how should abnormal indicators be managed?  based on the document content, the laboratory tests required before gynecological tumor surgery include:  - routine tests: all patients must have hemoglobin (Hb) checked.  - for specific populations:   - age ≥65 years: add blood glucose, uric acid/creatinine, chest x-ray, and electrocardiogram.   - malignant tumor patients: add platelet count, coagulation function (PT/APTT), and chest x-ray.   - others: depending on individual conditions, may include electrolytes, liver function, etc. (as per guideline Table 3-1).   management of abnormal indicators:  - hypokalemia (serum potassium <3.5 mmol/L): administer oral 10% potassium chloride solution 10–20 ml, 3 times/day, to correct electrolyte imbalance.  - diabetes (abnormal blood glucose): achieve target glucose levels through dietary control; monitor for related complications (e.g., vascular disease); adjust medications preoperatively (e.g., discontinue steroid hormones in advance).  - coagulation dysfunction (abnormal PT/APTT): assess bleeding risk preoperatively; consider delaying surgery or correcting coagulation factor deficiency if necessary; discontinue drug-induced platelet abnormalities for 7–10 days.  - malnutrition or hypoalbuminemia: evaluate nutritional status (e.g., plasma protein); provide total parenteral nutrition (TPN) support if indicated.  document source: "preoperative examination and patient preparation are conducted routinely... laboratory tests... Table 3-1 guideline for laboratory and other tests before gynecological surgery" and "for serum potassium below 3.5 mmol/L, give oral 10% potassium chloride solution 10–20 ml, 3 times/day" and "preoperative target glucose levels should be achieved through dietary control". | B | B | B |
| **Question 134: What is the optimal preoperative administration time for prophylactic antibiotics in gynecologic oncology surgery?** | | | | |
| Chunk size=512, Overlap=0 Using TokenTextSplitter | the optimal timing for administering prophylactic antibiotics in gynecologic oncology surgery is as follows:  - for patients without signs of infection, antibiotics should be given intraoperatively. - if infection of the lesion is suspected (e.g., tumor rupture or concurrent inflammation), antibiotics should be started 2 days in advance.  this strategy is based on infection risk assessment and aims to prevent postoperative complications such as wound infection or sepsis. the document does not specify particular antibiotic types but emphasizes adjustment according to the clinical condition.  (source: document excerpt [similarity: 0.416]) | D | D | D |
| Chunk size=256, Overlap=100 Using SentenceSplitter | the optimal timing for administering prophylactic antibiotics in gynecologic oncology surgery is not specified in the provided documentation. The document mentions "application of prophylactic antibiotics" as part of preoperative preparation but does not detail the timing (e.g., within 30 minutes before incision or other specific time points). For example, it states: "including skin preparation/intestinal preparation of the surgical field, application of prophylactic antibiotics, deep vein thrombosis (DVT) prophylaxis," without elaborating on the administration schedule. Therefore, based on the given context, the best timing for antibiotic prophylaxis cannot be determined. | D | D | D |
| **Question 135: What steps are typically included in preoperative bowel preparation for gynecologic oncology surgery?** | | | | |
| Chunk size=512, Overlap=0 Using TokenTextSplitter | preoperative bowel preparation for gynecological oncology surgery typically includes the following steps:  - Dietary modification:   - Begin a low-residue diet 1 day before surgery (avoid fibrous foods).   - If rectal resection is anticipated, start a low-residue diet 3 days before surgery and fast from the day before surgery.  - Laxative use:   - Administer magnesium salts (e.g., magnesium sulfate) and castor oil 1 day before surgery to promote bowel evacuation.  - Bowel cleansing:   - Perform vaginal douching combined with bowel cleansing 2–3 days before surgery.   - Conduct a preoperative cleansing enema on the morning of surgery, especially for patients with incomplete bowel obstruction.  - Antibiotic prophylaxis:   - Administer oral intestinal antibiotics for 3–5 days, commonly metronidazole plus neomycin or berberine, to reduce intestinal flora.   These steps aim to cleanse the bowel, reduce infection risk, and improve surgical exposure.  (source: document fragments [similarity: 0.398] and [similarity: 0.416]) | B | B | B |
| Chunk size=256, Overlap=100 Using SentenceSplitter | the steps for preoperative bowel preparation in gynecological oncology surgery include:  1. Dietary adjustment:   - Begin a low-residue diet (reducing fiber intake) on the morning of the day before surgery.   - If rectal resection is anticipated, start a low-residue diet 3 days before surgery and fast completely on the day before surgery.  2. Laxative use:   - Administer magnesium preparations (e.g., magnesium sulfate) and castor oil on the day before surgery to promote bowel evacuation.  3. Enema:   - Perform a high enema on the morning of surgery, typically by oral administration of 300mL enema solution or similar methods to cleanse the bowel.   Source: "Begin low-residue diet on the morning of the day before surgery, fast after dinner. If rectal resection is anticipated, start low-residue diet 3 days preoperatively and fast completely the day before. Administer magnesium preparations and castor oil the day before surgery, and perform high enema on the morning of surgery by oral intake of 300mL enema solution." | B | B | B |
| **Question 136: What steps are typically included in preoperative vaginal preparation for gynecologic oncology surgery?** | | | | |
| Chunk size=512, Overlap=0 Using TokenTextSplitter | no information available in the knowledge base regarding preoperative vaginal preparation steps for gynecological tumor surgery. | D | D | D |
| Chunk size=256, Overlap=100 Using SentenceSplitter | no answer found in the knowledge base. the document does not provide specific steps for vaginal preparation before gynecological tumor surgery (such as vaginal irrigation or disinfection procedures). | D | D | D |
| **Question 137: What is the first-line treatment for vulvar Paget's disease? Under what circumstances is an additional inguinal lymphadenectomy required?** | | | | |
| Chunk size=512, Overlap=0 Using TokenTextSplitter | the preferred treatment for vulvar Paget's disease is surgical treatment. In the following situations, inguinal lymph node dissection should be added:  1. When there is subcutaneous infiltration or concurrent vulvar apocrine gland carcinoma: radical vulvectomy and bilateral inguinal lymph node dissection are recommended.  2. When concurrent adenocarcinoma is present: treatment should follow that for invasive vulvar malignancy, typically involving radical vulvectomy and inguinal lymph node dissection.  3. When carcinoma in nearby visceral organs is identified: radical vulvectomy and bilateral inguinal lymph node dissection are indicated.  Additionally, for invasive lesions (e.g., invasive transformation or associated malignancy), lymph node dissection should be considered. | A | A | A |
| Chunk size=256, Overlap=100 Using SentenceSplitter | the preferred treatment for extramammary Paget's disease of the vulva is surgical excision, specifically vulvectomy (which may be simple or radical depending on the case).  Indications for adding inguinal lymph node dissection include: - Presence of invasive lesions - Coexistence of adenocarcinoma - Association with vulvar apocrine adenocarcinoma - Detection of carcinoma in nearby visceral organs (e.g., breast, rectum)  → In such cases, radical vulvectomy with bilateral inguinal lymph node dissection is typically recommended. | B | A | A |
| **Question 138: When surgically treating vulvar Paget's disease, what methods should be employed to reduce the risk of recurrence?** | | | | |
| Chunk size=512, Overlap=0 Using TokenTextSplitter | to reduce the risk of recurrence in the surgical treatment of vulvar Paget's disease, the following methods should be employed:  1. Ensure negative surgical margins: The document emphasizes that "positive surgical margins are a significant factor in postoperative recurrence" and recommends "taking multiple preoperative biopsy samples and using intraoperative frozen sections to guide the extent of surgery, which can reduce the rate of positive margins and postoperative recurrence" (similarity: 0.479). For patients with positive margins, "the surgical scope should be expanded until negative margins are achieved" (similarity: 0.479).  2. Select appropriate surgical extent: For cases with extensive lesions, advanced age, or poor follow-up conditions, "wide vulvar excision" is recommended, as it is associated with a lower recurrence rate (similarity: 0.501). The document states that "vulvectomy has the lowest postoperative recurrence rate" and suggests that "for patients with extensive lesions, advanced age, or poor follow-up conditions, wide vulvar excision is more suitable for the current situation in China" (similarity: 0.501).  3. Intraoperative rapid frozen section examination: During surgery, "rapid frozen section analysis should be performed to check for residual cancer cells at the margins, in order to determine the surgical extent and prevent postoperative recurrence" (similarity: 0.527). This allows for real-time adjustment of the surgical scope to minimize residual disease.  4. Long-term follow-up monitoring: Due to the high recurrence rate of vulvar Paget's disease (reported recurrence rates range from 11% to 38%), the document advises that "patients with vulvar Paget's disease require long-term follow-up" and "repeated excision of recurrent lesions" (similarity: 0.479).  5. Multi-point, multi-site sampling for pathological examination: To avoid false-negative results from intraoperative frozen sections (reported false-negative rate: 46%), the document stresses that "multi-point, multi-site sampling must be performed for pathological examination" (similarity: 0.527) to accurately assess invasive involvement. | A | A | A |
| Chunk size=256, Overlap=100 Using SentenceSplitter | to reduce the risk of recurrence in the surgical treatment of vulvar Paget's disease, the following methods should be employed:  1. Extended resection range: The incision should be more than 3 cm from the edge of the lesion, deep enough to reach the subcutaneous fat layer, and include all hair follicle appendage tissues.  2. Ensure negative margins: Positive surgical margins are one of the significant factors for postoperative recurrence. Therefore, it is recommended to extend the surgical range until negative margins are achieved for cases with positive lesion margins. Preoperative multiple-site biopsies and intraoperative frozen sections to guide the surgical range can reduce the positive margin rate and minimize postoperative recurrence.  3. Multiple-site sampling for examination: Sampling must be conducted at multiple sites and locations for pathological examination. | B | B | B |
| **Question 139: During a total vaginectomy, to achieve complete dissection of the vaginal sleeve, which key ligaments or muscle tissues need to be transected and managed in the upper, middle, and lower segments of the vagina, respectively?** | | | | |
| Chunk size=512, Overlap=0 Using TokenTextSplitter | During a total vaginectomy, to completely dissect the vaginal cuff, the following key ligaments or muscular structures must be transected and managed at the upper, middle, and lower segments of the vagina:  1. **Upper Segment (Vaginal Fornix Region):**  - **Cardinal Ligaments (Transverse Cervical Ligaments):** Located bilaterally at the vaginal fornix, extending laterally to the pelvic sidewall. Must be transected to free the superior and lateral attachments of the vaginal fornix.  - **Sacrouterine Ligaments:** Fibromuscular ligaments connecting the posterior-superior wall of the vaginal fornix to the presacral fascia. Must be transected to free the superior edge of the posterior vaginal fornix.  - **Pubocervical Ligaments (Vesicouterine Ligaments):** Fibromuscular bundles connecting the bladder neck/anterior vaginal wall to the posterior aspect of the pubic symphysis. Their attachments to the anterior vaginal wall must be sharply or bluntly dissected and transected.  - **Rectovaginal Septum (Rectovaginal Fascia):** A dense connective tissue septum between the posterior vaginal wall and the anterior rectal wall. Sharp dissection along this plane is required to separate the rectum from the posterior vaginal wall.  - **Round Ligaments of the Uterus:** If the uterus has been removed, their remnants (typically attached to the anterolateral vaginal fornix) must be ligated and transected.  2. **Middle Segment (Lateral Vaginal Wall):**  - **Cardinal Ligaments (Continuation):** Continue distally along the middle segment of the lateral vaginal wall to dissect and transect the distal fibers of the cardinal ligaments until reaching the level of the pelvic diaphragm.  - **Vesicovaginal Ligaments (Bladder Pillars):** Fibrous bundles located bilaterally at the middle segment of the anterior vaginal wall, connecting the bladder to the vagina. Must be carefully dissected and transected.  - **Lateral Rectal Ligaments (Continuation of Rectovaginal Fascia):** Fascial attachments of the rectum at the lateral aspect of the middle segment of the posterior vaginal wall. Must be sharply dissected and transected.  - **Superior Fascia of the Pelvic Diaphragm and Muscular Attachments:** The middle-lower segment of the lateral vaginal wall is attached to the superior fascia of the pelvic diaphragm and pelvic diaphragm muscles (primarily the pubococcygeus muscle). Sharp or blunt dissection is required to free the lateral vaginal wall.  3. **Lower Segment (Vaginal Vestibule and Perineal Body Region):**  - **Urethrovaginal Septum (Pubovesical Ligaments):** A dense fibrous tissue septum between the urethra and the lower segment of the anterior vaginal wall. Dissection along this plane is required to transect its connections.  - **Perineal Body (Central Tendon of the Perineum):** The lower segment of the posterior vaginal wall (perineal body) is firmly attached to the perineal body. Sharp or blunt dissection is required to completely separate the lower posterior vaginal wall from the perineal body.  - **Levator Ani Muscle (Pelvic Diaphragm Muscle) Attachments:** The fascial and muscular attachments of the lower segment of the lateral vaginal wall to the levator ani muscles (pubococcygeus and iliococcygeus muscles) must be completely dissected and transected.  - **Bulbospongiosus Muscles:** Muscles covering the bilateral entrance of the vaginal vestibule, with medial attachments to the mucosa and fascia around the vaginal orifice. Their connections to the vagina must be transected.  - **Ischiocavernosus Muscles:** Located near the ischial tuberosities, primarily attached to the crura of the clitoris, with indirect attachments to the tissues around the vaginal orifice. Their attachments are typically managed during the dissection of the soft tissues around the vaginal orifice.  - **Superficial Transverse Perineal Muscles:** Muscles connecting the ischial tuberosities, whose fascia may be attached to the lateral wall of the lower vaginal segment. Must be dissected and transected.  - **Paravaginal Tissue:** Blood vessels and nerve plexuses within the loose connective tissue between the lower segment of the lateral vaginal wall and the pelvic diaphragm fascia/muscles must be carefully ligated or coagulated.  → **Dissection Sequence:** Typically, the upper segment (fornix) ligaments (cardinal ligaments, sacrouterine ligaments, pubocervical ligaments, rectovaginal septum) are addressed first, followed by dissection along the middle segment lateral wall (distal cardinal ligaments, vesicovaginal ligaments, lateral rectal ligaments, and pelvic diaphragm attachments). Finally, the lower segment (perineal body, urethrovaginal septum, pelvic diaphragm muscles, and surrounding muscular attachments) is managed. Hemostasis must be maintained throughout, and adjacent structures (urethra, bladder, rectum) must be protected. | D | D | D |
| Chunk size=256, Overlap=100 Using SentenceSplitter | The provided document does not specify the key ligaments or muscle tissues that need to be severed and managed at the upper, middle, and lower segments of the vagina during a total vaginectomy for complete dissection of the vaginal cuff.  The document describes the general steps for circumferential vaginal wall incision and formation of the vaginal "sleeve":  - "At least 3 cm away from the tumor margin, perform a full-thickness circumferential incision of the vaginal wall... Dissect upward the vesicovaginal space, cut the connective tissue between the pubovesical fascia and the cervicovaginal fascia, and push the bladder aside. Then clamp the posterior vaginal wall incision margin and dissect posteriorly and superiorly the rectovaginal space to reach the peritoneal reflection at the uterorectal pouch. Subsequently, dissect and expand the paravaginal tissues laterally toward the pelvic sidewalls, severing and suturing them laterally." (similarity 0.559)  This section addresses general anatomical areas (e.g., vesicovaginal space, rectovaginal space, paravaginal tissues) but does not segment the procedure by upper, middle, and lower vaginal levels or identify specific structures such as the cardinal ligaments or uterosacral ligaments per segment.  Response: No answer found in the knowledge base. The document does not contain specific information on the ligaments or muscle tissues to be severed and managed at the upper, middle, and lower vaginal segments during a total vaginectomy. | D | D | D |
| **Question 140: A patient develops severe cervical stenosis several months after treatment for a cervical lesion. Among the various treatment modalities for cervical lesions (e.g., cold knife conization, laser conization, LEEP), which surgical procedure is most likely to cause this complication? Please also describe two key risk factors associated with the occurrence of this complication.** | | | | |
| Chunk size=512, Overlap=0 Using TokenTextSplitter | Cold knife conization is most likely to cause severe cervical canal stenosis.  Two key risk factors: 1. Extent of resection (especially cone depth and width): The larger the resection range, particularly when the depth exceeds 10mm or the width exceeds 2-3 times the external cervical os, the greater the loss of cervical canal tissue, significantly increasing the risk of scar formation. 2. Degree of electrocoagulation or cauterization at the surgical margins: Excessive use of electrocoagulation for hemostasis can cause thermal damage, impairing the regenerative capacity of the cervical canal mucosa and leading to fibrotic stenosis.  → Cold knife conization, due to the use of sharp blades for extensive anatomical resection and often requiring extensive electrocoagulation for hemostasis, has a higher incidence of cervical canal stenosis compared to laser conization and LEEP. Laser and LEEP can reduce the risk of deep tissue damage through precise control of the treatment area and superficial coagulation. | D | D | D |
| Chunk size=256, Overlap=100 Using SentenceSplitter | Among cervical lesion treatment methods such as cold knife conization, laser conization, and LEEP (loop electrosurgical excision procedure), **LEEP is most likely to cause cervical canal stenosis**.  Two key risk factors associated with this complication are:  1. **Volume and depth of tissue resection**   The larger the resection range and the deeper the cone, the more severe the damage to the cervical stroma, the higher the risk of scar formation, and consequently, the increased incidence of cervical canal stenosis.  2. **Postoperative infection or inflammatory response**   Postoperative infection can trigger significant inflammatory reactions and fibrotic healing processes, leading to excessive scarring of cervical tissue and significantly increasing the risk of cervical canal stenosis.  No answer was found in the knowledge base. The document does not provide information comparing the risks of cervical canal stenosis caused by cervical lesion treatment methods (cold knife conization, laser conization, LEEP) or related risk factors. | D | D | D |
| **Question 141: What are the differences in anatomical dissection between an intrafascial hysterectomy and a simple hysterectomy?** | | | | |
| Chunk size=512, Overlap=0 Using TokenTextSplitter | What are the differences in anatomical approach between intramural hysterectomy and conservative (standard) hysterectomy?  In terms of anatomical approach, the main differences between intramural hysterectomy and conservative (standard) hysterectomy lie in the handling of the cervical fascia, the extent of bladder dissection, and the need for rectal separation: - Intramural hysterectomy: The procedure is performed within the cervical fascia, preserving all or most of the cervical fascia. The bladder is pushed down only to the mid-cervix level, and rectal dissection is not required. This reduces the risk of urinary system complications, as the operation is limited below the isthmus of the cervix (similarity 0.597 segment). - Conservative hysterectomy: Only the parametrial and adjacent portions of the cervical fascia are preserved. During surgery, the bladder must be dissected down to the anterior vaginal fornix, and rectal separation may be performed depending on the length of vaginal resection. This involves a broader bladder dissection, which may increase operative complexity (similarity 0.597 segment). In summary, the intramural approach emphasizes preservation of fascia and reduced bladder mobilization, whereas the conservative approach involves deeper bladder dissection and possible partial rectal separation. | A | A | A |
| Chunk size=256, Overlap=100 Using SentenceSplitter | the main differences in anatomical approach between intrafascial hysterectomy and conservative hysterectomy are as follows: - Intrafascial hysterectomy: The procedure is performed within the cervical fascia, preserving all or most of the cervical fascia. During surgery, the bladder only needs to be pushed down to the mid-cervix, and separation of the rectum is not required. This reduces the extent of bladder and rectal dissection and lowers the risk of injury to adjacent organs. - Conservative hysterectomy: Only the parametrium and adjacent portions of the cervical fascia are preserved. During surgery, the bladder must be pushed down to the anterior vaginal fornix, and separation of the rectum may or may not be performed depending on the length of vaginal resection. This increases the extent of bladder dissection and may involve more tissue manipulation.  The document explicitly describes this distinction: "Intrafascial hysterectomy... is performed within the cervical fascia, preserving all or most of the cervical fascia... pushing the bladder down to the mid-cervix suffices, and rectal separation is not needed. In contrast, conservative hysterectomy... preserves only the parametrium and adjacent portions of the cervical fascia... the bladder must be pushed down to the anterior vaginal fornix during surgery, and rectal separation may or may not be performed depending on the length of vaginal resection." (similarity: 0.633) | A | A | A |
| **Question 142: In a vaginal hysterectomy, what is the rationale for determining the length of the upper vagina to be resected?** | | | | |
| Chunk size=512, Overlap=0 Using TokenTextSplitter | the basis for determining the length of the upper vaginal segment to be resected during vaginal hysterectomy is the location of the lesion as indicated by colposcopy or iodine test. Specifically:  - The resection length should be 0.5 to 0.6 cm below the lesion area, and typically resecting 1 to 2 cm is sufficient. This ensures complete removal of the diseased tissue while minimizing the risk of recurrence (source segment with similarity 0.522).  This criterion is based on the visual localization of the lesion, with the aim of thoroughly clearing the affected area. | B | A | A |
| Chunk size=256, Overlap=100 Using SentenceSplitter | the basis for determining the length of the upper vaginal segment to be resected during a vaginal hysterectomy is the location of the lesion area as indicated by colposcopy or iodine testing. specifically: - the resection should be made 0.5 to 0.6 cm below the lesion area as shown by colposcopy or iodine test. - generally, resecting 1 to 2 cm of the vagina is sufficient, depending on the extent of the lesion.  the document explicitly states: "the length of the upper vaginal segment to be resected should be 0.5~0.6 cm below the lesion area as indicated by colposcopy or iodine testing; resection of 1~2 cm of the vagina is usually sufficient." (similarity: 0.570) | A | A | A |
| **Question 143: How are the uterine vessels and the cardinal ligament managed during a simple hysterectomy?** | | | | |
| Chunk size=512, Overlap=0 Using TokenTextSplitter | no answer found in the knowledge base.  - The provided document fragments describe general steps of conservative hysterectomy (such as handling adnexa and round ligaments) but do not specify the techniques for managing uterine vessels and cardinal ligaments. For example, the fragment with similarity 0.549 mentions clamping and cutting tissues but lacks detailed description of uterine vessel and cardinal ligament management. Other fragments (e.g., similarity 0.597) discuss extrafascial procedures but do not cover vascular and ligamentous details specific to conservative approaches. | D | D | D |
| Chunk size=256, Overlap=100 Using SentenceSplitter | how to handle the uterine vessels and main ligaments during a conservative hysterectomy  according to the document, the method for handling the uterine vessels and main ligaments in a conservative hysterectomy is as follows: - during surgery, operate close to the cervical side to avoid injury to the ureter. - specific method: clamp and cut the paracervical tissue and vaginal paracolpium along the lateral wall of the cervix, including the main ligament, ligament (possibly referring to the uterosacral ligament or cardinal ligament), and cervicovesical ligament, etc. this involves directly clamping and cutting these structures, ensuring that cervical tissue is not included.  the document states: "standard total hysterectomy (also known as conservative total hysterectomy)... clamp and cut the paracervical tissue and vaginal paracolpium along the lateral wall of the cervix, including the main ligament, ligament, cervicovesical ligament, etc. to avoid ureteral injury, operate close to the cervical side..." (similarity: 0.532). the document does not provide more detailed vascular ligation techniques but emphasizes operating close to the cervix to protect the ureter. | A | A | A |
| **Question 144: What are the high-risk factors for recurrence after treatment for Cervical Intraepithelial Neoplasia (CIN)?** | | | | |
| Chunk size=512, Overlap=0 Using TokenTextSplitter | the high-risk factors for recurrence after treatment of cervical intraepithelial neoplasia include:  - High-grade lesion (CIN 2 or CIN 3) - Positive or uncertain surgical margins after excisional procedure - Persistent infection with high-risk human papillomavirus (HPV) post-treatment - Incomplete excision of the lesion - Large lesion size (>3 cm) or extensive involvement - Young age at diagnosis (under 30 years) - Immunosuppression - Smoking - Coexistent cervical glandular intraepithelial neoplasia (CGIN) - Multiple prior treatments or recurrent disease history - Inadequate follow-up or loss to surveillance  → These factors are associated with increased risk of residual or recurrent disease following treatment for cervical intraepithelial neoplasia. | D | D | D |
| Chunk size=256, Overlap=100 Using SentenceSplitter | The provided document does not directly mention the high-risk factors for recurrence after treatment of cervical intraepithelial neoplasia (CIN). The document primarily discusses surgical treatment methods for CIN (such as the types and indications of hysterectomy), surgical techniques, and the importance of follow-up, but does not list specific high-risk factors for recurrence (e.g., lesion grade, margin status, persistent HPV infection, etc.).  Therefore, based on the document content: No answer was found in the knowledge base. | D | D | D |
| **Question 145: Under what circumstances is a hysterectomy recommended for patients with endometrial hyperplasia? When can medical therapy be used?** | | | | |
| Chunk size=512, Overlap=0 Using TokenTextSplitter | under what circumstances is hysterectomy recommended for patients with endometrial hyperplasia? when can drug therapy be used?  based on the document content, the recommendations are as follows:  - circumstances recommending hysterectomy:   - patients aged 40 or above, with confirmed diagnosis and no fertility requirements.   - persistent endometrial hyperplasia or worsening clinical symptoms after appropriate cyclic drug therapy, with suspicion of malignant transformation or confirmed progression to cancer.   - irregular vaginal bleeding that cannot be controlled by curettage or drug therapy, or recurrent postpartum bleeding.   - severe atypical hyperplasia combined with significant uterine bleeding and/or suspicion of an estrogen-secreting ovarian tumor (source segment similarity 0.508).   additionally, for perimenopausal and postmenopausal women, especially those with severe atypical hyperplasia, hysterectomy should be prioritized unless contraindications to surgery exist (source segment similarity 0.478).  - circumstances recommending drug therapy:   - simple hyperplasia or complex hyperplasia (benign lesions with low cancer risk), particularly suitable for young patients or those with fertility requirements; first-line drug therapy (e.g., progestins or GnRHa) is preferred. drug therapy is also indicated for patients with hypertension, diabetes, obesity, or advanced age with poor surgical tolerance, under close monitoring (source segment similarities 0.508 and 0.478).   if drug therapy is ineffective, conservative surgery (e.g., suction curettage) or hysterectomy may be considered. | B | B | B |
| Chunk size=256, Overlap=100 Using SentenceSplitter | under what circumstances is hysterectomy recommended for patients with endometrial hyperplasia? when can drug therapy be used?  according to the document, the treatment recommendations for patients with endometrial hyperplasia are as follows: - circumstances recommending hysterectomy:  - patients aged 40 or above, with confirmed diagnosis and no desire for fertility.  - persistent endometrial hyperplasia or worsening clinical symptoms after correct cyclic drug therapy, with suspicion of malignant transformation or progression to cancer.  - irregular vaginal bleeding not controlled by curettage or drug therapy, or recurrent postpartum bleeding.  - severe atypical hyperplasia combined with significant uterine bleeding and/or suspicion of an estrogen-secreting ovarian tumor.  - perimenopausal and postmenopausal women, especially those with atypical hyperplasia, should undergo hysterectomy unless there are severe surgical contraindications. - circumstances permitting drug therapy:  - patients under 40 years old with low risk of malignancy, suitable for active conservative treatment; young patients desiring fertility should receive drug therapy as first choice.  - patients with hypertension, diabetes, obesity, or advanced age with poor surgical tolerance may receive drug therapy first under close monitoring and follow-up.  - patients aged 40 to perimenopause may choose drug therapy or surgery based on patient preference.  the document explicitly states: "in principle, for patients under 40 years old... drug therapy is the first choice; for those with hypertension, diabetes, obesity, or advanced age with poor surgical tolerance, drug therapy under close monitoring may also be considered; patients aged 40 to perimenopause may choose drug or surgical therapy based on preference; perimenopausal and postmenopausal women, especially those with atypical hyperplasia, should undergo hysterectomy..." (similarity: 0.487) and "hysterectomy is indicated for: 1) patients aged 40 or above... (2) persistent hyperplasia or progression after correct cyclic drug therapy... (3) irregular vaginal bleeding not controlled by curettage or drugs... (4) severe atypical hyperplasia..." (similarity: 0.475). | B | A | A |
| **Question 146: In deep inguinal lymphadenectomy for invasive vulvar cancer, what is the purpose of managing the sartorius muscle?** | | | | |
| Chunk size=512, Overlap=0 Using TokenTextSplitter | the purpose of handling the sartorius muscle during deep inguinal lymph node dissection for vulvar infiltrating carcinoma is to serve as a lateral anatomical landmark for defining the dissection boundary. Specifically, the resection extends laterally to the sartorius muscle to aid in identifying the cribriform fascia and to delineate the lymph node dissection area, ensuring complete removal of at-risk nodal tissue while minimizing unnecessary dissection beyond this muscular boundary. | D | D | D |
| Chunk size=256, Overlap=100 Using SentenceSplitter | In the surgical procedure of deep inguinal lymph node dissection for vulvar infiltrating carcinoma, the purpose of handling the sartorius muscle is to cover the exposed femoral vessels to reduce postoperative complications (such as bleeding or infection). Specifically, some surgeons transect the sartorius muscle near the anterior superior iliac spine and then suture the free edge of the sartorius muscle to the inguinal ligament to protect the femoral vessel region (referencing segments with similarity scores of 0.504 and 0.486). | A | B | A |
| **Question 147: For a patient with Stage I vulvar cancer, where the tumor diameter is ≤2 cm and the lesion is confined to one labium majus, but postoperative histopathology indicates lymphovascular space invasion (LVSI), what surgical procedure should be performed?** | | | | |
| Chunk size=512, Overlap=0 Using TokenTextSplitter | for a stage I vulvar cancer patient with a tumor diameter ≤ 2 cm, lesion confined to one side of the labia majora, but postoperative histopathological examination revealing involvement of vascular or lymphatic spaces, radical total vulvectomy and bilateral inguinal lymphadenectomy should be performed.  - According to the document content (similarity: 0.637 segment): For stage I vulvar cancer patients, if vascular or lymphatic space involvement is present, regardless of tumor size or location (including confinement to one side of the labia majora), "radical vulvectomy plus bilateral inguinal lymphadenectomy" should be carried out. The document explicitly states: "If vascular or lymphatic space involvement is present, radical vulvectomy plus bilateral inguinal lymphadenectomy should be performed." This corresponds to radical total vulvectomy (i.e., the traditional standard surgery) and bilateral inguinal lymphadenectomy to ensure thorough clearance of potential metastatic risk. | A | A | A |
| Chunk size=256, Overlap=100 Using SentenceSplitter | for a stage I vulvar cancer patient with a tumor diameter ≤ 2 cm, lesion confined to one side of the labia majora, but postoperative histopathological examination reveals vascular or lymphatic space involvement, then a radical total vulvectomy plus bilateral inguinal lymph node dissection should be performed for the patient.  according to the document content, when a stage I vulvar cancer patient has vascular or lymphatic space involvement, a radical total vulvectomy plus bilateral inguinal lymph node dissection should be performed. this is because vascular or lymphatic invasion increases the risk of lymph node metastasis, thus requiring a more extensive surgical approach (reference: similarity 0.644 and 0.568 segments). | A | A | A |
| **Question 148: In inguinal lymphadenectomy, what is the difference in patient indications for using separate incisions versus a single incision?** | | | | |
| Chunk size=512, Overlap=0 Using TokenTextSplitter | In inguinal lymph node dissection, the differences in the applicable populations between the separate incision and the single incision are as follows:  The separate incision is suitable for patients with lesions on the lateral vulva or posterior perineal body, and for those with small anterior vulvar cancer lesions without clinical inguinal lymph node metastasis;  The single incision is suitable for patients with locally extensive infiltration, especially those with extensive infiltration in the anterior perineal region.  - According to the source material (similarity: 0.535 segment):   - Separate incision: Mostly applied to "lesions on the lateral vulva and posterior perineal body, as well as small anterior vulvar cancer lesions without clinical inguinal lymph node metastasis." Its advantages include "preserving more of the skin bridge between the perineal body and the inguinal incision, resulting in lower postoperative morbidity," but the disadvantage is "a higher failure rate in cases of locally extensive vulvar cancer infiltration."   - Single incision: Suitable for "patients with locally extensive infiltration, especially those with extensive infiltration in the anterior perineal region." Its advantage is "more thorough surgery," but the disadvantage is "higher postoperative morbidity compared to the former." Selection should consider "tumor size and distribution." | A | A | A |
| Chunk size=256, Overlap=100 Using SentenceSplitter | In inguinal lymph node dissection, the differences in the applicable patient populations for the separate incision and the single incision are as follows:  - **Separate incision**: Suitable for lesions located laterally in the vulva and posteriorly in the perineal body, as well as for smaller anterior vulvar carcinomas without clinically evident inguinal lymph node metastasis. This approach preserves more of the skin bridge between the perineal body and the inguinal incision, resulting in lower postoperative morbidity; however, it has a higher failure rate in cases of vulvar cancer with extensive local infiltration.  - **Single incision**: Suitable for patients with extensive local infiltration, particularly those with widespread involvement in the anterior perineum. This incision allows for a more radical surgical procedure but is associated with higher postoperative morbidity (as referenced in segments with similarity scores of 0.676 and 0.592). | A | A | A |
| **Question 149: What is the sequence for clearing the lymphofatty tissue from the common iliac vessels and the external iliac artery?** | | | | |
| Chunk size=512, Overlap=0 Using TokenTextSplitter | the order is to clear the iliac common vessel area first, followed by the external iliac artery area.  - Based on the document content (similarity: 0.471 segment): In laparoscopic pelvic lymphadenectomy, it is described as "resecting the common iliac lymph nodes... clearing the lymph nodes covered from the common iliac vessels to the inguinal ligament," then "resecting the external iliac lymph nodes... located between the external iliac artery and the psoas major muscle." The document explicitly states "resecting the common iliac lymph nodes" first, followed by "resecting the external iliac lymph nodes," indicating a top-down sequence: first address the common iliac vessel region (including the bifurcation of the common iliac artery), then the external iliac artery region. | B | B | B |
| Chunk size=256, Overlap=100 Using SentenceSplitter | the order for clearing lymphatic and adipose tissue from the common iliac vessels and external iliac artery is: begin at the common iliac segment, proceed from superior to inferior and from outer to inner, sequentially resecting the lymphatic and adipose tissue of the lower common iliac segment, external iliac, deep inguinal, internal iliac, and obturator regions (reference segment with similarity 0.486). | B | B | B |
| **Question 150: In extraperitoneal pelvic lymphadenectomy for radical vulvectomy, what are the two different approaches to managing drainage of the surgical wound?** | | | | |
| Chunk size=512, Overlap=0 Using TokenTextSplitter | two different approaches for managing the wound drainage during the radical vulvectomy component of an extraperitoneal pelvic lymphadenectomy for vulvar cancer are:  1. Placement of a rubber drain tube for negative pressure drainage. 2. No drain placement, instead using a figure-of-eight compression bandage with gauze to control fluid accumulation, ensuring consistent pressure during bandaging to minimize seroma formation.  - Based on the source text (similarity: 0.630 segment): When describing wound management after inguinal lymphadenectomy, the document states: “A rubber drain tube is placed in the wound cavity for negative pressure drainage. Some scholars do not advocate placing a drain tube and instead use a figure-of-eight compression bandage with gauze, but the bandaging must maintain uniform pressure to reduce fluid accumulation.” This explicitly lists the two methods:  1. Placement of a rubber drain tube: Used for negative pressure drainage to reduce fluid accumulation and infection risk.  2. Figure-of-eight compression bandage with gauze: No drain tube is used; fluid accumulation is controlled by compression bandaging, requiring uniform pressure application. | A | A | A |
| Chunk size=256, Overlap=100 Using SentenceSplitter | no answer found in the knowledge base. | D | D | D |
| **Question 151: What are the common types of incisions used in a radical complete vulvectomy?** | | | | |
| Chunk size=512, Overlap=0 Using TokenTextSplitter | no answer found in the knowledge base. | D | D | D |
| Chunk size=256, Overlap=100 Using SentenceSplitter | the common incision types used in radical total vulvectomy are as follows:  - Type ①: Begins approximately 3 cm above the clitoris, follows the lateral margin of the labia majora, and converges at the midline of the perineum (without resection of the mons pubis). - Type ②: Same as type ①, but also includes a longitudinal incision of the mons pubis skin about 3 cm (preserving the mons pubis skin while resecting subcutaneous tissue down to the pubic fascia). The document states "the author often uses type (2) incision," indicating this is a commonly employed type. - Type ③: Along the superior border of the pubic symphysis, the lateral margin of the mons pubis, and the lateral margin of the labia majora, converging at the perineum. - Type ④: Essentially the same as type ③, but the lateral vulvar margins extend to the medial aspect of the thighs.  These incision designs aim to ensure adequate tumor resection margins (at least 3 cm from the tumor) while considering postoperative function and appearance. | A | A | A |
| **Question 152: When vulvar cancer involves the urethra, what are the three progressively extensive surgical options described in the text, based on the degree and extent of involvement? Please summarize the core procedure and indications for each.** | | | | |
| Chunk size=512, Overlap=0 Using TokenTextSplitter | 1. Partial urethrectomy   - Core procedure: Dissection is performed from above the urethra, deep to the level of the tumor, with resection of an appropriate segment of the urethra. The dorsal urethral fascia is sutured to the pubic symphysis periosteum to ensure urethral protrusion and fixation. The urethral meatus is sutured to adjacent skin flaps or vaginal mucosa to prevent coverage of the urethral opening.   - Indication: Suitable for cases with minor involvement of the mons pubis, clitoral hood, frenulum, clitoral body, anterior half of the labia minora, vestibule, or urethra, where partial urethral resection is required but voiding function is preserved.   2. Total urethrectomy   - Core procedure: Complete urethrectomy is performed while preserving the bladder internal sphincter. A bladder wall flap urethroplasty is conducted by harvesting a longitudinal bladder wall flap (approximately 4 cm in width, length adjusted as needed) from the anterior bladder wall to construct a new urethra and restore voiding function.   - Indication: Suitable for cases where vulvar cancer invades the urethra to a depth of 2–3 cm, requiring complete urethral removal while maintaining bladder function.   3. Anterior pelvic exenteration   - Core procedure: During radical vulvectomy, the urethra and entire bladder are resected, with urinary diversion performed using an ileal or sigmoid colon neobladder.   - Indication: Suitable for cases where vulvar cancer has infiltrated the bladder trigone, representing advanced invasion requiring extensive resection for tumor control.   These procedures progress based on the extent of invasion: partial urethrectomy for mild invasion, total urethrectomy for moderate invasion (2–3 cm depth), and anterior pelvic exenteration for severe invasion involving the bladder trigone. The document emphasizes that these surgeries are combined with radical complete vulvectomy and bilateral inguinal lymph node dissection (Source: [Similarity: 0.495] segment). | A | A | A |
[truncated: 3,397,691 more chars]
