# Supplementary material for: A Comparative Performance Study of Retrieval-Augmented Generation Systems in Gynecologic Oncology
Source: Research Square preprint supplement (doi:10.21203/rs.3.rs-8221196/v1), 2025-12-22
Supplement: Supplementary file 2 [file 5adb7edd7f7d4cd83812fbde.docx]

# Table 1 Responses Of Optimal Chunksize Validation Experienment

| **Models** | **Response** | **Assessments** | | |
| --- | --- | --- | --- | --- |
| **Reviewer 1** | **Reviewer 2** | **Final** |
| **Question 1: HPV阳性高危型的检查流程是什么？** | | | | |
| Chunk size=512, Overlap=0 Using TokenTextSplitter | HPV阳性高危型的检查流程是什么？  基于文档内容，高危型HPV阳性的检查流程如下（主要依据第一个文档片段中的图1描述）：   - 起始点：患者高危型HPV检测结果为阳性（HPV(+)）。  - 第一级分流：   - 若已进行HPV分型检测：进入HPV分型结果路径。   - HPV16/18阳性：立即转诊阴道镜检查。   - HPV16/18阴性或其他12型阳性：进行宫颈细胞学检查。   - 若未进行分型检测（HPV不分型）：直接进入细胞学检查路径。  - 细胞学检查路径（适用于所有需细胞学分流的患者）：   - 细胞学检查结果≥ASC-US（包括ASC-US、LSIL、HSIL等异常）：转诊阴道镜检查。   - 细胞学检查结果阴性（-）：建议1年后重复细胞学+HPV联合检查。  - 特殊路径：   - 未分型HPV阳性患者：必须进行细胞学检查（跳过分型步骤）。   - 其他12型阳性且细胞学阴性：年度复查（不需阴道镜）。   此流程在多个文档片段中得到支持（例如，相似度0.668的片段详细描述了图1流程；相似度0.524的片段提到HPV阳性/细胞学阴性的管理）。流程强调分型检测的重要性，并根据分型结果和细胞学检查决定是否转诊阴道镜或复查。  关键依据：   - "图1：对于高危型HPV阳性患者应按照以下流程处理..."（相似度0.668）。  - "HPV 分型时HPV16、18阳性，立即转诊阴道镜..."（相似度0.524）。 | A | A | A |
| Chunk size=256, Overlap=100 Using SentenceSplitter | HPV阳性高危型的检查流程是什么？  基于文档内容，高危型HPV阳性患者的检查流程如下（主要参考图1描述）： - 起始点：患者高危型HPV检测结果为阳性（HPV(+)）。 - 第一级分流：  - 若已进行HPV分型检测 → 进入HPV分型结果路径。  - 若未进行分型检测（HPV不分型） → 直接进入细胞学检查路径。 - HPV分型路径：  - HPV16/18阳性 → 立即转诊阴道镜检查。  - HPV16/18阴性或其他12型阳性 → 进行宫颈细胞学检查。 - 细胞学检查路径（适用于所有需细胞学分流的患者）：  - 细胞学检查结果≥ASC-US（包括ASC-US、LSIL、HSIL等异常） → 转诊阴道镜检查。  - 细胞学检查结果阴性（-） → 建议1年后重复细胞学+HPV联合检查。 - 特殊路径：  - 未分型HPV阳性患者 → 必须进行细胞学检查（无分型直接跳过）。  - 其他12型阳性且细胞学阴性 → 年度复查（不需阴道镜）。  此流程强调以细胞学检查作为分流依据，尤其当HPV未分型时。文档指出，该流程基于中国临床实践，建议结合当地医疗条件个体化处理（例如，文档提到“建议参考既往有充分临床数据验证研究的文献报道”）。 | A | A | A |
| **Question 2: 当初始筛查显示HPV阳性伴高危HPV型别，强调HPV未分型时，下一步检查是什么？** | | | | |
| Chunk size=512, Overlap=0 Using TokenTextSplitter | 当初始筛查显示HPV阳性伴高危HPV型别，强调HPV未分型时，下一步检查是什么？  当初始筛查显示HPV阳性但未分型时，下一步检查是直接进行宫颈细胞学检查。文档明确指出，如果HPV检测未分型，患者应跳过分型步骤，立即进入细胞学检查路径。细胞学检查结果将决定后续处理：   - 如果细胞学≥ASC-US，转诊阴道镜检查。  - 如果细胞学阴性，建议1年后复查联合检测（细胞学+HPV）。   此处理基于风险分层：未分型HPV阳性被视为较高风险，需细胞学分流以评估是否需要阴道镜。   关键依据：   - "若未进行分型检测（HPV不分型）→直接进入细胞学检查路径"（相似度0.668）。  - "HPV 没有分型检测，建议结合临床症状和体征，必要时直接转诊阴道镜检查"（相似度0.524），但文档强调"必要时"仅当症状存在时；一般情况下，未分型阳性优先进行细胞学检查。 | A | A | A |
| Chunk size=256, Overlap=100 Using SentenceSplitter | 当初始筛查显示HPV阳性伴高危HPV型别，强调HPV未分型时，下一步检查是什么？  基于文档内容，当HPV阳性但未分型时，下一步检查是宫颈细胞学检查。文档明确说明： - “强调HPV不分型时，以细胞学检查分流”（例如，在“以高危型HPV作为初筛”部分）。 - 特殊路径中重复：“未分型HPV阳性患者→必须进行细胞学检查（无分型直接跳过）”。 - 理由：HPV未分型无法直接区分高危型别（如HPV16/18），因此需通过细胞学检查进一步评估风险。如果细胞学异常（≥ASC-US），则转诊阴道镜；如果细胞学阴性，则建议年度复查。 | A | A | A |
| **Question 3: 当初始筛查显示HPV阳性伴高危HPV型别且细胞学检查结果为阴性时，这表明什么？是否应该定期复查，如果是，频率应该是多少？** | | | | |
| Chunk size=512, Overlap=0 Using TokenTextSplitter | 当初始筛查显示HPV阳性伴高危HPV型别且细胞学检查结果为阴性时，这表明什么？是否应该定期复查，如果是，频率应该是多少？  这表明什么：HPV阳性但细胞学阴性表明患者处于低风险状态，但并非无风险。文档解释，这通常代表HPV感染可能为一过性，癌变风险较低（5年CINⅢ+累积风险低于阈值），但需监测以防进展。  - 是否应该定期复查：是的，必须定期复查。  - 复查频率：1年后重复细胞学+HPV联合检查。如果复查结果正常，可转为常规筛查；如果异常，则根据结果转诊阴道镜。   文档强调，HPV阳性/细胞学阴性患者中，如果HPV分型为其他12型（非16/18），风险更低，只需年度复查；但如果未分型或症状可疑，复查频率不变。   关键依据：   - "细胞学检查结果阴性（-）→建议1年后重复细胞学+HPV联合检查"（相似度0.668）。  - "细胞学（-）& HPV（+） 则应进行1年复查（1年后重复联合检测）"（相似度0.507）。  - "HPV 阳性 /细胞学阴性...建议1年复查"（相似度0.524）。 | A | A | A |
| Chunk size=256, Overlap=100 Using SentenceSplitter | 当初始筛查显示HPV阳性伴高危HPV型别且细胞学检查结果为阴性时，这表明什么？是否应该定期复查，如果是，频率应该是多少？  基于文档内容： - 这表明什么：HPV阳性但细胞学阴性表明患者处于较低风险状态，但并非无风险。文档提到，此类情况（例如“其他12型阳性且细胞学阴性”）的5年CINⅢ+累积风险较低（具体数值未在提供片段中给出，但描述为“风险较低”），通常不需要立即干预，但需监测以防进展。 - 是否应该定期复查：是的，应该定期复查。 - 复查频率：1年后重复细胞学和HPV联合检查（即年度复查）。文档多次强调：  - “细胞学检查结果阴性（-）→建议1年后重复细胞学+HPV联合检查”。  - 在联合检测流程中：“细胞学（-）& HPV（+） 则应进行1年复查（1年后重复联合检测）”。  - 特殊路径：“其他12型阳性且细胞学阴性→年度复查（不需阴道镜）”。  复查目的是监测HPV清除或病变进展，如果连续复查阴性，可转为常规筛查。 | A | A | A |
| **Question 4: 当初始筛查显示HPV阳性伴高危HPV型别且细胞学检查结果≥ASC-US（意义不明的鳞状细胞）时，下一步是否应该进行阴道镜检查？** | | | | |
| Chunk size=512, Overlap=0 Using TokenTextSplitter | 当初始筛查显示HPV阳性伴高危HPV型别且细胞学检查结果≥ASC-US（意义不明的鳞状细胞）时，下一步是否应该进行阴道镜检查？  是的，下一步应该立即转诊阴道镜检查。文档明确指出，无论HPV分型结果如何，细胞学检查结果≥ASC-US（包括ASC-US、LSIL、HSIL等异常）均需直接转诊阴道镜，以评估是否存在高级别病变或癌变风险。   此处理基于高风险证据：HPV阳性联合细胞学≥ASC-US时，5年CINⅢ+累积风险较高（文档提到约6.8%），支持直接阴道镜检查。   关键依据：   - "细胞学检查结果≥ASC-US（包括ASC-US、LSIL、HSIL等异常）→转诊阴道镜检查"（相似度0.668）。  - "HPV 阳性 /ASC-US...依据同等风险同等管理，支持直接转诊阴道镜"（相似度0.524）。 | A | B | A |
| Chunk size=256, Overlap=100 Using SentenceSplitter | 当初始筛查显示HPV阳性伴高危HPV型别且细胞学检查结果≥ASC-US（意义不明的鳞状细胞）时，下一步是否应该进行阴道镜检查？  是的，应该进行阴道镜检查。文档明确支持这一处理： - 在细胞学检查路径中：“细胞学检查结果≥ASC-US（包括ASC-US、LSIL、HSIL等异常）→转诊阴道镜检查”。 - 在联合检测流程中：“细胞学 ≥ ASC-US & HPV（+） 则应进行进一步分诊”，并指出如果HPV未分型或分型后非HPV16/18阳性，但细胞学≥ASC-US，均需转诊阴道镜（例如，“若HPV未分型检测阳性：则应直接转诊阴道镜”）。 - 文档还提到，ASC-US患者中高危型HPV感染率高（31%~60%），且5年CINⅢ+累积风险为6.8%，高于LSIL风险，支持直接转诊阴道镜以排除高级别病变。 | A | A | A |
| **Question 5: 当初始筛查显示HPV阳性伴高危HPV型别，经分型检查发现为HPV16/18阳性时，下一步是否应该进行阴道镜检查？** | | | | |
| Chunk size=512, Overlap=0 Using TokenTextSplitter | 当初始筛查显示HPV阳性伴高危HPV型别，经分型检查发现为HPV16/18阳性时，下一步是否应该进行阴道镜检查？  是的，下一步应该立即转诊阴道镜检查。文档强调，HPV16/18阳性被视为最高风险型别，无论细胞学结果如何（即使细胞学阴性），均需直接转诊阴道镜，以排除高级别病变或早期癌变。   此处理基于HPV16/18的高致癌性：文档指出，这些型别与快速进展为CINⅢ+相关，因此不依赖细胞学结果，直接进行阴道镜评估。   关键依据：   - "HPV16/18阳性→立即转诊阴道镜检查"（相似度0.668）。  - "HPV分型时HPV16、18阳性，立即转诊阴道镜"（相似度0.524）。  - "细胞学 ≥ ASC-US & HPV（+）...若HPV分型检测阳性：HPV16/18阳性 → 立即转诊阴道镜"（相似度0.507），但文档明确HPV16/18阳性时，即使细胞学阴性也需阴道镜。 | A | A | A |
| Chunk size=256, Overlap=100 Using SentenceSplitter | 当初始筛查显示HPV阳性伴高危HPV型别，经分型检查发现为HPV16/18阳性时，下一步是否应该进行阴道镜检查？  是的，应该立即进行阴道镜检查。文档在多个部分强调： - HPV分型路径中：“HPV16/18阳性→立即转诊阴道镜检查”。 - 在管理流程中重复：“HPV16/18阳性→立即转诊阴道镜”。 - 理由：HPV16/18是高危型别，与宫颈高级别病变（如CINⅢ）和浸润癌风险显著相关（文档提到“被诊断为≥CINⅢ的概率为70%~75%”），因此需紧急评估以早期干预。 | A | A | A |
| **Question 6: 当初始筛查显示HPV阳性伴高危HPV型别，经分型检查显示既非HPV16/18阳性但属于其他十二种型别之一时，最可能的后续检查是什么？** | | | | |
| Chunk size=512, Overlap=0 Using TokenTextSplitter | 当初始筛查显示HPV阳性伴高危HPV型别，经分型检查显示既非HPV16/18阳性但属于其他十二种型别之一时，最可能的后续检查是什么？  回答： 根据文档内容，当HPV分型检查显示为HPV16/18阴性但属于其他12种高危型别阳性时，最可能的后续检查是进行宫颈细胞学检查。文档明确指出："HPV分型路径：HPV16/18阴性或其他12型阳性→进行宫颈细胞学检查"（来自第一个文档片段）。此外，在第三个文档片段中也提到："HPV16/18阴性但其他12型高危HPV阳性 → 进行宫颈细胞学检查"。因此，后续检查是宫颈细胞学检查，以进一步评估细胞异常情况。 | A | A | A |
| Chunk size=256, Overlap=100 Using SentenceSplitter | 当初始筛查显示HPV阳性伴高危HPV型别，经分型检查显示既非HPV16/18阳性但属于其他十二种型别之一时，最可能的后续检查是什么？  回答: 根据文档内容，当HPV分型检测显示为其他12型高危HPV阳性（非HPV16/18）且细胞学检查结果为阴性时，最可能的后续检查是1年后重复细胞学和HPV联合检查（年度复查），无需立即进行阴道镜检查。   - 支持证据:   - 在[相似度: 0.696]片段中："其他12型阳性且细胞学阴性→年度复查（不需阴道镜）"。   - 在[相似度: 0.634]片段中："HPV分型时...其他12型(+)...细胞学(-)...1年复查"。   - 在[相似度: 0.597]片段中："细胞学(-) & HPV(+) 则应进行1年复查（1年后重复联合检测）"。   - 解释: 文档明确指出，对于非HPV16/18的其他12型高危HPV阳性且细胞学阴性的患者，管理方案是年度复查（即1年后重复细胞学和HPV联合检测），而不是直接转诊阴道镜。这基于风险分层，因为此类情况的风险较低。 | A | A | A |
| **Question 7: 当细胞学检查显示ASC-US作为异常初始筛查结果时，下一步检查是什么？** | | | | |
| Chunk size=512, Overlap=0 Using TokenTextSplitter | 当细胞学检查显示ASC-US作为异常初始筛查结果时，下一步检查是什么？  回答： 根据文档内容，当细胞学检查显示ASC-US（意义不明的非典型鳞状细胞）作为异常初始筛查结果时，下一步检查是进行HPV检测以进行分流。文档明确指出："ASC-US患者：首先应进行HPV检测"（来自第二个文档片段）。在第四个文档片段中也强调："ASC-US患者应首先进行HPV检测"。因此，下一步是HPV检测，以确定是否需要转诊阴道镜或后续复查。 | A | A | A |
| Chunk size=256, Overlap=100 Using SentenceSplitter | 当细胞学检查显示ASC-US作为异常初始筛查结果时，下一步检查是什么？  回答: 根据文档内容，当细胞学检查显示ASC-US（意义不明的非典型鳞状细胞）作为异常初始筛查结果时，下一步检查是进行HPV检测以分流。   - 支持证据:   - 在[相似度: 0.696]片段中："ASC-US患者：首先应进行HPV检测"。   - 在[相似度: 0.725]片段中："对ASC-US使用HPV进行分流"。   - 在[相似度: 0.634]片段中："细胞学（ASC-US）& HPV（-） 则应进行1年复查"，这隐含了HPV检测是分流的第一步。   - 解释: 文档一致表明，ASC-US是细胞学异常的一种常见类型，其处理流程以HPV检测作为初始分流工具，以决定后续管理（如转诊阴道镜或复查）。 | A | A | A |
| **Question 8: 当细胞学检查显示ASC-US作为异常初始筛查结果并使用HPV进行分流时，如果HPV阳性，是否应该进行阴道镜检查？** | | | | |
| Chunk size=512, Overlap=0 Using TokenTextSplitter | 当细胞学检查显示ASC-US作为异常初始筛查结果并使用HPV进行分流时，如果HPV阳性，是否应该进行阴道镜检查？  回答： 是的，应该进行阴道镜检查。文档明确指出，当ASC-US患者进行HPV分流检测结果为阳性时，应直接转诊阴道镜检查。例如，第二个文档片段提到："ASC-US患者：首先应进行HPV检测：若HPV阳性（+）→转诊阴道镜检查"。第四个文档片段也支持这一观点："HPV阳性/ASC-US其5年CINⅢ+的累积风险为6.8%，高于LSIL风险，依据同等风险同等管理，支持直接转诊阴道镜"。因此，HPV阳性时，阴道镜检查是必要的。 | A | A | A |
| Chunk size=256, Overlap=100 Using SentenceSplitter | 当细胞学检查显示ASC-US作为异常初始筛查结果并使用HPV进行分流时，如果HPV阳性，是否应该进行阴道镜检查？  回答: 是的，根据文档内容，当细胞学检查显示ASC-US并使用HPV进行分流时，如果HPV检测结果为阳性（无论是否分型），应转诊进行阴道镜检查。   - 支持证据:   - 在[相似度: 0.696]片段中："若HPV阳性（+）→转诊阴道镜检查"。   - 在[相似度: 0.725]片段中："对ASC-US使用HPV进行分流，如果HPV阳性(不分型)或HPV分型检测HPV16、18阳性，均应转诊阴道镜检查"。   - 在[相似度: 0.634]片段中："HPV阳性/ASC-US...支持直接转诊阴道镜"。   - 解释: 文档强调，HPV阳性（包括未分型或任何高危型）结合ASC-US结果，其CINⅢ+风险较高，因此必须转诊阴道镜以排除高级别病变。 | A | A | A |
| **Question 9: 当细胞学检查显示ASC-US作为异常初始筛查结果并使用HPV进行分流时，如果HPV阴性，后续检查应该是什么？** | | | | |
| Chunk size=512, Overlap=0 Using TokenTextSplitter | 当细胞学检查显示ASC-US作为异常初始筛查结果并使用HPV进行分流时，如果HPV阴性，后续检查应该是什么？  回答： 根据文档内容，当ASC-US患者进行HPV分流检测结果为阴性时，后续检查是1年后重复细胞学检查。文档明确指出："ASC-US患者：首先应进行HPV检测：若HPV阴性（-）→1年后应复查（重复细胞学检查）"（来自第二个文档片段）。在复查中，如果结果为阴性，则转为常规筛查；如果结果≥ASC-US，则需进行阴道镜检查。因此，后续检查是1年后的细胞学复查。 | A | A | A |
| Chunk size=256, Overlap=100 Using SentenceSplitter | 当细胞学检查显示ASC-US作为异常初始筛查结果并使用HPV进行分流时，如果HPV阴性，后续检查应该是什么？  回答: 根据文档内容，当细胞学检查显示ASC-US并使用HPV进行分流时，如果HPV检测结果为阴性，后续检查是1年后重复细胞学检查（如果复查结果异常，则需进一步处理）。   - 支持证据:   - 在[相似度: 0.696]片段中："若HPV阴性（-）→1年后应复查（重复细胞学检查），若复查结果为阴性则后续进行常规筛查即可，若结果大于等于ASC，则应进行阴道镜检查"。   - 在[相似度: 0.634]片段中："细胞学（ASC-US）& HPV（-） 则应进行1年复查（1年后重复联合检测）"。   - 在[相似度: 0.597]片段中："细胞学（ASC-US）& HPV（-） 则应进行1年复查"。   - 解释: HPV阴性结果表示低风险，因此管理方案是1年后复查细胞学（或联合检测），以监测变化；如果复查正常，则转为常规筛查。 | A | A | A |
| **Question 10: 当细胞学检查结果显示ASC-H（高度鳞状上皮内病变不能除外的鳞状细胞）、LSIL（低度鳞状上皮内病变）或HSIL（高度鳞状上皮内病变）时，是否需要进行阴道镜检查？** | | | | |
| Chunk size=512, Overlap=0 Using TokenTextSplitter | 当细胞学检查结果显示ASC-H（高度鳞状上皮内病变不能除外的鳞状细胞）、LSIL（低度鳞状上皮内病变）或HSIL（高度鳞状上皮内病变）时，是否需要进行阴道镜检查？  回答： 是的，需要进行阴道镜检查。文档明确指出，对于细胞学检查结果为ASC-H、LSIL或HSIL的患者，应直接转诊阴道镜检查。例如，第二个文档片段提到："其他异常类型患者（ASC-H,LSIL,HSIL,AGC以及ASC-US患者，一年复查后）：直接转诊阴道镜检查"。在第一个文档片段中也强调："细胞学检查结果≥ASC-US（包括ASC-US、LSIL、HSIL等异常）→转诊阴道镜检查"。此外，第二个文档片段补充："对于细胞学异常的ASC-H、LSIL、HSIL、AGC均应转诊阴道镜"。因此，ASC-H、LSIL和HSIL均需阴道镜检查。 | A | A | A |
| Chunk size=256, Overlap=100 Using SentenceSplitter | 当细胞学检查结果显示ASC-H（高度鳞状上皮内病变不能除外的鳞状细胞）、LSIL（低度鳞状上皮内病变）或HSIL（高度鳞状上皮内病变）时，是否需要进行阴道镜检查？  回答: 是的，根据文档内容，当细胞学检查结果显示ASC-H、LSIL或HSIL时，应转诊进行阴道镜检查。   - 支持证据:   - 在[相似度: 0.725]片段中："对于细胞学异常的ASC-H、LSIL、HSIL、AGC均应转诊阴道镜"。   - 在[相似度: 0.696]片段中："其他异常类型患者（ASC-H,LSIL,HSIL）直接转诊阴道镜检查"。   - 在[相似度: 0.390]片段中："对于细胞学异常的ASC-H、LSIL、HSIL、AGC均应转诊阴道镜"。   - 解释: 文档明确指出，这些细胞学异常类型（ASC-H、LSIL、HSIL）具有较高的CIN诊断风险（例如，ASC-H被诊断为CINⅡ/Ⅲ的概率为24%~94%，LSIL被诊断为≥CINⅠ的概率为10%~16%），因此必须直接转诊阴道镜以进行组织学评估。 | A | A | A |
| **Question 11: 当细胞学检查结果显示AGC（意义不明的腺细胞）时，需要进行什么检查？** | | | | |
| Chunk size=512, Overlap=0 Using TokenTextSplitter | 当细胞学检查结果显示AGC（意义不明的腺细胞）时，需要进行什么检查？  根据文档内容，当细胞学检查结果显示AGC（非典型腺细胞）时，患者需要直接转诊阴道镜检查，并额外进行以下检查：  - 加做宫颈管搔刮（ECC）：用于评估宫颈管内病变。 - 加做HPV检测：以确认高危型HPV感染状态。 - 加做子宫内膜诊刮：用于排除子宫内膜相关病变。  文档依据：[相似度: 0.552] 片段中提到："其他异常类型患者（ASC-H,LSIL,HSIL,AGC以及ASC-US患者，一年复查后）：直接转诊阴道镜检查，其中AGC患者需要：加做宫颈管搔刮（ECC）、加做HPV检测、加做子宫内膜诊刮"。这明确说明了AGC的处理流程。 | A | A | A |
| Chunk size=256, Overlap=100 Using SentenceSplitter | 当细胞学检查结果显示AGC（意义不明的腺细胞）时，需要进行什么检查？  根据文档内容，当细胞学检查结果显示AGC时，需要进行以下检查：  - 直接转诊阴道镜检查：文档明确指出，对于AGC患者，必须转诊阴道镜检查（相似度0.739片段："其他异常类型患者（ASC-H,LSIL,HSIL,AGC以及ASC-US患者，一年复查后）：直接转诊阴道镜检查"）。  - 加做宫颈管搔刮（ECC）：AGC患者需要额外进行宫颈管搔刮（ECC），以评估宫颈管内的病变（相似度0.739片段："其中AGC患者需要：加做宫颈管搔刮（ECC）"）。  - 加做HPV检测：AGC患者需进行HPV检测，以评估HPV感染状态（相似度0.739片段："加做HPV检测"）。  - 加做子宫内膜诊刮：当可疑有子宫内膜癌风险时，需进行子宫内膜诊刮（相似度0.458片段："对于AGC还特别强调要进行颈管搔刮，当可疑有子宫内膜癌风险时应做子宫内膜诊刮取子宫内膜活检送病理学检查"）。  综上，AGC的处理包括转诊阴道镜、ECC、HPV检测和可能的子宫内膜诊刮。 | A | A | A |
| **Question 12: 如果细胞学和高危HPV联合检测均显示阴性结果，应该进行什么其他检查？** | | | | |
| Chunk size=512, Overlap=0 Using TokenTextSplitter | 如果细胞学和高危HPV联合检测均显示阴性结果，应该进行什么其他检查？  根据文档内容，如果细胞学和高危HPV联合检测均显示阴性（细胞学（-）& HPV（-）），不需要进行其他额外检查，而是应进行常规筛查（按常规筛查周期继续后续检查）。文档指出，这种结果的风险很低（约0.08%），建议遵循标准筛查间隔（如3年或5年一次）。 文档依据：[相似度: 0.552] 片段中提到："HPV 阴性/细胞学阴性 其风险为 0.08%，... 3年重复宫颈癌筛查"；[相似度: 0.457] 片段中明确："细胞学（-）& HPV（-） 则应进行常规筛查（按常规周期继续筛查）"。文档未提及需要其他额外检查。 | A | A | A |
| Chunk size=256, Overlap=100 Using SentenceSplitter | 如果细胞学和高危HPV联合检测均显示阴性结果，应该进行什么其他检查？  根据文档内容，如果细胞学和高危HPV联合检测均显示阴性（即细胞学（-）和HPV（-）），不需要进行其他额外检查，而是应进行常规筛查：  - 常规筛查（按常规周期继续筛查）：文档明确说明，这种结果应进入常规筛查流程，筛查间隔为3年或5年（相似度0.667片段："细胞学（-）& HPV（-） 则应进行常规筛查（按常规周期继续筛查）"；相似度0.577片段："HPV 阴性/细胞学阴性 其风险为 $0.08\%$ ，提示可以选择更长时间的筛查间隔(例如 5 年)"）。  文档中没有提到需要其他检查（如阴道镜或活检），因此只需按推荐间隔进行常规筛查。 | A | B | A |
| **Question 13: 如果细胞学和高危HPV联合检测显示HPV阴性且细胞学结果为ASC-US，下一步应该怎么做？** | | | | |
| Chunk size=512, Overlap=0 Using TokenTextSplitter | 如果细胞学和高危HPV联合检测显示HPV阴性且细胞学结果为ASC-US，下一步应该怎么做？  根据文档内容，如果细胞学和高危HPV联合检测显示HPV阴性且细胞学结果为ASC-US，下一步应进行1年后复查（重复细胞学和高危HPV联合检测）。如果复查结果阴性，则转为常规筛查；如果复查结果异常（≥ASC-US），则需转诊阴道镜检查。 文档依据：[相似度: 0.457] 片段中明确："细胞学（ASC-US）& HPV（-） 则应进行1年复查（1年后重复联合检测）"。文档未指定其他处理。 | A | A | A |
| Chunk size=256, Overlap=100 Using SentenceSplitter | 如果细胞学和高危HPV联合检测显示HPV阴性且细胞学结果为ASC-US，下一步应该怎么做？  根据文档内容，如果HPV阴性且细胞学结果为ASC-US，下一步应进行1年复查：  - 1年复查（1年后重复联合检测）：文档明确指出，这种结果组合应进行1年后的重复联合检测（细胞学+高危HPV检测），无需立即转诊阴道镜（相似度0.667片段："细胞学（ASC-US）& HPV（-） 则应进行1年复查（1年后重复联合检测）"；相似度0.555片段："细胞学（ASC-US）& HPV（-） 则应进行1年复查（1年后重复联合检测）"）。  复查后，如果结果异常，再根据新结果处理（如转诊阴道镜）。 | A | A | A |
| **Question 14: 如果细胞学和高危HPV联合检测显示HPV阴性且细胞学结果>ASC-US，下一步应该怎么做？是否需要阴道镜检查？** | | | | |
| Chunk size=512, Overlap=0 Using TokenTextSplitter | 如果细胞学和高危HPV联合检测显示HPV阴性且细胞学结果>ASC-US，下一步应该怎么做？是否需要阴道镜检查？  根据文档内容，如果细胞学和高危HPV联合检测显示HPV阴性且细胞学结果>ASC-US（如LSIL、HSIL等），应立即转诊阴道镜检查。文档明确指出，这种情况下需要阴道镜检查以评估潜在高级别病变。 文档依据：[相似度: 0.457] 片段中明确："细胞学 > ASC-US（如LSIL、HSIL等）& HPV（-） 则应立即转诊阴道镜检查"。因此，需要阴道镜检查。 | A | A | A |
| Chunk size=256, Overlap=100 Using SentenceSplitter | 如果细胞学和高危HPV联合检测显示HPV阴性且细胞学结果>ASC-US，下一步应该怎么做？是否需要阴道镜检查？  根据文档内容，如果HPV阴性但细胞学结果>ASC-US（如LSIL、HSIL等），应立即转诊阴道镜检查：  - 立即转诊阴道镜检查：文档明确要求这种结果组合必须转诊阴道镜（相似度0.667片段："细胞学 > ASC-US（如LSIL、HSIL等）& HPV（-） 则应立即转诊阴道镜检查"；相似度0.555片段："细胞学 > ASC-US（如LSIL、HSIL等）& HPV（-） 则应立即转诊阴道镜检查"）。  是的，需要阴道镜检查，因为细胞学结果>ASC-US（如LSIL或HSIL）表示高级别病变风险较高，即使HPV阴性，也需阴道镜评估以排除癌前病变或癌症。 | A | A | A |
| **Question 15: 在宫颈癌检测中，如果细胞学和高危HPV联合检测显示HPV阳性且细胞学结果≥ASC-US，应该进行什么具体检查？** | | | | |
| Chunk size=512, Overlap=0 Using TokenTextSplitter | 在宫颈癌检测中，如果细胞学和高危HPV联合检测显示HPV阳性且细胞学结果≥ASC-US，应该进行什么具体检查？  根据文档内容，如果细胞学和高危HPV联合检测显示HPV阳性且细胞学结果≥ASC-US，应进行进一步分诊，具体取决于HPV分型检测的结果：  - 若已进行HPV分型检测：  - HPV16/18阳性：立即转诊阴道镜检查。  - HPV16/18阴性但其他12型高危HPV阳性：建议1年后复查（重复联合检测）。 - 若未进行HPV分型检测（HPV未分型阳性）：直接转诊阴道镜检查。  文档依据：[相似度: 0.457] 片段中明确："细胞学 ≥ ASC-US & HPV（+） 则应进行进一步分诊（根据HPV分型结果细分）：- 若HPV分型检测阳性：* HPV16/18阳性 → 立即转诊阴道镜 * HPV16/18阴性但其他12型高危HPV阳性 → 1年复查 - 若HPV未分型检测阳性：则应直接转诊阴道镜"。文档未提及其他具体检查，仅基于分型结果决定后续步骤。 | A | A | A |
| Chunk size=256, Overlap=100 Using SentenceSplitter | 在宫颈癌检测中，如果细胞学和高危HPV联合检测显示HPV阳性且细胞学结果≥ASC-US，应该进行什么具体检查？  根据文档内容，如果HPV阳性且细胞学结果≥ASC-US，应进行进一步分诊，具体检查取决于HPV分型结果：  - 根据HPV分型结果细分：   - 若HPV分型检测阳性：   - HPV16/18阳性 → 立即转诊阴道镜检查（相似度0.555片段："若HPV分型检测阳性：* HPV16/18阳性 → 立即转诊阴道镜"）。   - HPV16/18阴性但其他12型高危HPV阳性 → 1年复查（相似度0.555片段："HPV16/18阴性但其他12型高危HPV阳性 → 1年复查"）。   - 若HPV未分型检测阳性 → 直接转诊阴道镜检查（相似度0.555片段："若HPV未分型检测阳性：则应直接转诊阴道镜"）。  综上，具体检查包括HPV分型检测（如果未分型），然后根据分型结果决定是立即转诊阴道镜还是1年复查。文档强调，分型是关键步骤（相似度0.606片段也支持分型路径）。 | A | A | A |
| **Question 16: 在宫颈癌检测中，如果细胞学和高危HPV联合检测显示HPV阳性且细胞学结果为阴性，应该进行什么具体检查？** | | | | |
| Chunk size=512, Overlap=0 Using TokenTextSplitter | 在宫颈癌检测中，如果细胞学和高危HPV联合检测显示HPV阳性且细胞学结果为阴性，应该进行什么具体检查？  根据文档内容（特别是相似度0.620和0.623的片段）：   - 如果HPV分型检测可用：   - HPV16/18阳性：立即转诊阴道镜检查。   - HPV16/18阴性但其他12型高危HPV阳性：建议1年后重复细胞学+HPV联合检查（即年度复查）。  - 如果HPV未分型检测（即未进行分型）：建议结合临床症状和体征，必要时直接转诊阴道镜检查。   具体检查步骤总结：   1. 优先进行HPV分型检测（如果尚未进行）。  2. 根据分型结果：   - HPV16/18阳性 → 阴道镜检查。   - 其他12型阳性 → 1年后重复联合检测（细胞学+HPV）。  3. 如果未分型 → 直接转诊阴道镜检查（文档强调“必要时”基于临床判断）。   文档依据：相似度0.620片段中的“2.3.3 HPV阳性 /细胞学阴性：① HPV分型时HPV16、18阳性，立即转诊阴道镜; ② HPV没有分型检测，建议结合临床症状和体征，必要时直接转诊阴道镜检查”和相似度0.623片段中的“4. 细胞学（-）& HPV（+） 则应进行1年复查”。 | A | A | A |
| Chunk size=256, Overlap=100 Using SentenceSplitter | 在宫颈癌检测中，如果细胞学和高危HPV联合检测显示HPV阳性且细胞学结果为阴性，应该进行什么具体检查？  根据文档内容，当细胞学和高危HPV联合检测显示HPV阳性（HPV(+)）且细胞学结果为阴性（细胞学(-)）时，处理流程取决于HPV分型情况： - 如果进行了HPV分型检测且结果为HPV16/18阳性，则应立即转诊阴道镜检查（见[相似度: 0.535]和[相似度: 0.613]）。 - 如果HPV分型检测显示其他12型高危HPV阳性（即非HPV16/18），或未进行分型检测（HPV不分型），则应进行1年后重复细胞学+HPV联合检查（见[相似度: 0.526]、[相似度: 0.611]和[相似度: 0.613]）。 - 具体到本问题（未指定分型），一般推荐进行1年后复查联合检测。文档中强调：“细胞学（-）& HPV（+） 则应进行1年复查（1年后重复联合检测）”（[相似度: 0.613]）。  答案： 应进行1年后重复细胞学+高危HPV联合检测。如果HPV分型为HPV16/18阳性，则立即转诊阴道镜检查；如果未分型或分型为其他12型阳性，则按1年复查处理。 | A | A | A |
| **Question 17: 在宫颈癌检测中，如果细胞学和高危HPV联合检测显示HPV阳性且细胞学结果为阴性，HPV分型为HPV16/18阳性，应该进行什么具体检查？** | | | | |
| Chunk size=512, Overlap=0 Using TokenTextSplitter | 在宫颈癌检测中，如果细胞学和高危HPV联合检测显示HPV阳性且细胞学结果为阴性，HPV分型为HPV16/18阳性，应该进行什么具体检查？  根据文档内容（特别是相似度0.620和0.623的片段）：   - HPV分型为HPV16/18阳性且细胞学阴性时，必须立即转诊阴道镜检查。   具体检查：直接进行阴道镜检查，无需其他前置检查。   文档依据：相似度0.620片段中的“HPV分型时HPV16、18阳性，立即转诊阴道镜”和相似度0.623片段中的图3描述“HPV16/18阳性 → 立即转诊阴道镜”。 | A | A | A |
| Chunk size=256, Overlap=100 Using SentenceSplitter | 在宫颈癌检测中，如果细胞学和高危HPV联合检测显示HPV阳性且细胞学结果为阴性，HPV分型为HPV16/18阳性，应该进行什么具体检查？  文档明确指出，当细胞学和高危HPV联合检测显示HPV阳性、细胞学阴性，且HPV分型为HPV16/18阳性时，应立即转诊阴道镜检查。这是因为HPV16/18是高危型别，与宫颈癌风险高度相关，需要直接进行阴道镜评估以排除高级别病变或癌变（见[相似度: 0.535]、[相似度: 0.613]和[相似度: 0.611]）。例如： - “HPV 分型时HPV16、18 阳性，立即转诊阴道镜”（[相似度: 0.535]）。 - “若HPV分型检测阳性：* HPV16/18阳性 → 立即转诊阴道镜”（[相似度: 0.613]）。  答案： 应立即转诊阴道镜检查。 | A | B | A |
| **Question 18: 在宫颈癌检测中，如果患者的细胞学和高危HPV联合检测显示HPV阳性，细胞学结果为阴性，且没有HPV16或HPV18分型，是否需要其他检查？** | | | | |
| Chunk size=512, Overlap=0 Using TokenTextSplitter | 在宫颈癌检测中，如果患者的细胞学和高危HPV联合检测显示HPV阳性，细胞学结果为阴性，且没有HPV16或HPV18分型，是否需要其他检查？  根据文档内容（特别是相似度0.620和0.623的片段）：   - “没有HPV16或HPV18分型”意味着两种情况：   - HPV分型检测显示其他12型高危HPV阳性：需要其他检查，即1年后重复细胞学+HPV联合检查（年度复查）。   - HPV未分型检测（未进行分型）：需要其他检查，即建议转诊阴道镜检查（基于临床症状和体征）。   是否需要其他检查：是，必须根据分型状态进行：   - 如果分型为其他12型阳性 → 进行1年后重复联合检测。   - 如果未分型 → 进行阴道镜检查。   文档依据：相似度0.620片段中的“HPV阳性 /细胞学阴性：...② HPV没有分型检测，建议...直接转诊阴道镜检查”和相似度0.623片段中的“HPV16/18阴性但其他12型高危HPV阳性 → 1年复查”。 | A | A | A |
| Chunk size=256, Overlap=100 Using SentenceSplitter | 在宫颈癌检测中，如果患者的细胞学和高危HPV联合检测显示HPV阳性，细胞学结果为阴性，且没有HPV16或HPV18分型，是否需要其他检查？  文档中，“没有HPV16或HPV18分型”可能指两种情况：HPV分型检测显示其他12型高危HPV阳性，或未进行分型检测（即HPV不分型）。处理方式不同： - 如果进行了HPV分型检测且结果为其他12型高危HPV阳性（非HPV16/18）：应进行1年后重复细胞学+HPV联合检查，无需立即其他检查（见[相似度: 0.613]：“HPV16/18阴性但其他12型高危HPV阳性 → 1年复查”)。 - 如果未进行HPV分型检测（HPV不分型）：则建议直接转诊阴道镜检查，因为未分型无法排除高风险型别（见[相似度: 0.535]：“HPV 没有分型检测，建议结合临床症状和体征，必要时直接转诊阴道镜检查”；[相似度: 0.613]：“若HPV未分型检测阳性： 则应直接转诊阴道镜”）。 - 文档未提及在“没有HPV16或18分型”时需额外检查（如影像学），仅强调根据分型状态决定后续步骤。  答案： 需要其他检查，具体取决于分型情况： - 如果分型检测显示其他12型阳性，则进行1年后重复联合检测，无需立即其他检查。 - 如果未分型检测，则直接转诊阴道镜检查。 | D | D | D |
| **Question 19: 在宫颈癌筛查中，如果患者组织病理学确认（活检）为LSIL，细胞学发现为LSIL或更低级别，且TZ3分类，应该进行什么随访步骤？** | | | | |
| Chunk size=512, Overlap=0 Using TokenTextSplitter | 在宫颈癌筛查中，如果患者组织病理学确认（活检）为LSIL，细胞学发现为LSIL或更高级别，且TZ3分类，应该进行什么随访步骤？  根据文档内容（特别是相似度0.411和0.371的片段）：   - 组织病理学确诊LSIL后，处理取决于细胞学结果级别：   - 如果细胞学结果为LSIL（低级别）或更低（≤LSIL）：TZ3分类（转化区不可见）时，应进行子宫颈管搔刮术(ECC)检查，并根据ECC结果进行后续管理（如组织学诊断级别）。   - 如果细胞学结果为ASC-H或更高级别（≥ASC-H）：TZ3分类时，应转诊阴道镜检查或直接进行诊断性宫颈切除术（文档中针对高级别细胞学异常的处理）。   随访步骤总结：   1. 评估细胞学具体级别：   - 细胞学≤LSIL → 进行ECC检查。   - 细胞学≥ASC-H → 转诊阴道镜检查或诊断性宫颈切除术。  2. 后续管理基于ECC或活检结果（如无浸润癌则继续随访）。   文档依据：相似度0.411片段中的“组织病理学确诊LSIL...若细胞学≤LSIL...若患者为TZ3型，则患者应进行子宫颈管搔刮术(ECC)检查”和“若细胞学≥ASC-H...TZ3 → 阴道镜检查”；相似度0.371片段补充了诊断性宫颈切除术的选项。 | A | A | A |
| Chunk size=256, Overlap=100 Using SentenceSplitter | 在宫颈癌检测中，如果患者的细胞学和高危HPV联合检测显示HPV阳性，细胞学结果为阴性，且没有HPV16或HPV18分型，是否需要其他检查？  文档中，“没有HPV16或HPV18分型”可能指两种情况：HPV分型检测显示其他12型高危HPV阳性，或未进行分型检测（即HPV不分型）。处理方式不同： - **如果进行了HPV分型检测且结果为其他12型高危HPV阳性（非HPV16/18）**：应进行1年后重复细胞学+HPV联合检查，无需立即其他检查（见[相似度: 0.613]：“HPV16/18阴性但其他12型高危HPV阳性 → 1年复查”)。 - **如果未进行HPV分型检测（HPV不分型）**：则建议直接转诊阴道镜检查，因为未分型无法排除高风险型别（见[相似度: 0.535]：“HPV 没有分型检测，建议结合临床症状和体征，必要时直接转诊阴道镜检查”；[相似度: 0.613]：“若HPV未分型检测阳性： 则应直接转诊阴道镜”）。 - 文档未提及在“没有HPV16或18分型”时需额外检查（如影像学），仅强调根据分型状态决定后续步骤。  **答案：** 需要其他检查，具体取决于分型情况： - 如果分型检测显示其他12型阳性，则进行1年后重复联合检测，无需立即其他检查。 - 如果未分型检测，则直接转诊阴道镜检查。 | A | A | A |
| **Question 20: 在宫颈癌筛查中，如果患者组织病理学确认（活检）为LSIL，细胞学发现为LSIL或更低级别，且TZ1/2分类，应该进行什么随访步骤？** | | | | |
| Chunk size=512, Overlap=0 Using TokenTextSplitter | 在宫颈癌筛查中，如果患者组织病理学确认（活检）为LSIL，细胞学发现为LSIL或更低级别，且TZ1/2分类，应该进行什么随访步骤？  根据文档内容（特别是相似度0.411的片段）：   - 组织病理学确诊LSIL，细胞学结果为LSIL或更低级别（≤LSIL），且TZ1/2分类（转化区完全或部分可见）时，应进入观察随访路径。   随访步骤：  - 每6~12周进行一次复查（包括细胞学检查和阴道镜检查），以密切监测并排除浸润癌。  - 若连续两次复查结果阴性（无异常），则转为常规筛查（如每3-5年一次联合检测）。   文档依据：相似度0.411片段中的“组织病理学确诊LSIL...细胞学≤LSIL（低级别病变）若患者TZ分型为TZ1型或2型：则应进入观察随访路径：每6~12周复查（密切监测，排除浸润癌）。若连续两次复查阴性→转常规筛查”。 | A | A | A |
| Chunk size=256, Overlap=100 Using SentenceSplitter | 在宫颈癌筛查中，如果患者组织病理学确认（活检）为LSIL，细胞学发现为LSIL或更低级别，且TZ1/2分类，应该进行什么随访步骤？  文档中，对于组织病理学确诊LSIL、细胞学发现≤LSIL（低级别病变，包括LSIL或更低如阴性），且TZ分类为TZ1/2（转化区部分或完全可见）的患者，推荐进入观察随访路径： - 应每6~12周进行复查（包括细胞学和阴道镜检查），以密切监测并排除浸润癌（见[相似度: 0.424]：“若细胞学≤LSIL ... 若患者TZ分型为TZ1型或2型：则应进入观察随访路径：§ 每6~12周复查（密切监测，排除浸润癌）”)。 - 如果连续两次复查结果阴性（无异常），则转为常规筛查（见[相似度: 0.424]：“若连续两次复查阴性→转常规筛查”；[相似度: 0.448]：“TZ1/2 观察(6~12月复查)”)。 - 文档强调此路径适用于非特殊人群（如非妊娠或年轻患者），并基于风险管理的原则。  答案： 应每6~12周进行复查（包括细胞学和阴道镜检查），密切监测排除浸润癌。若连续两次复查结果阴性，则转为常规筛查。 | A | A | A |
| **Question 21: 在宫颈癌筛查中，如果患者组织病理学确认（活检）为LSIL，细胞学发现为ASC-H或更高级别，应该进行什么随访步骤？** | | | | |
| Chunk size=512, Overlap=0 Using TokenTextSplitter | 在宫颈癌筛查中，如果患者组织病理学确认（活检）为LSIL，细胞学发现为ASC-H或更高级别，应该进行什么随访步骤？  回答: 根据文档上下文（相似度0.502和0.407），对于组织病理学确诊为LSIL且细胞学结果为ASC-H或更高级别（≥ASC-H）的患者（假设为非特殊人群，即普通患者，年龄非21-24岁且非妊娠），处理流程依赖于宫颈转化区类型（TZ），这需要通过阴道镜检查来确定。具体步骤如下：  - 首先，应进行阴道镜检查以评估TZ类型。  - 如果阴道镜检查显示TZ3（转化区不可见），则转诊阴道镜检查（可能包括进一步评估或活检）。  - 如果阴道镜检查显示TZ1/2（转化区部分或完全可见），则进行诊断性宫颈切除术±颈管搔刮术（ECC）。  - 文档来源: "图4：组织病理学确诊LSIL的处理流程...若细胞学≥ASC-H（提示高级别病变可能） o 非特殊人群（普通患者）： →按转化区类型（TZ）处理： § TZ3（转化区不可见）→阴道镜检查。 § TZ1/2（转化区部分/完全可见）→诊断性宫颈切除术±颈管搔刮术（ECC）。"（相似度0.502） | A | A | A |
| Chunk size=256, Overlap=100 Using SentenceSplitter | 在宫颈癌筛查中，如果患者组织病理学确认（活检）为LSIL，细胞学发现为ASC-H或更高级别，应该进行什么随访步骤？  根据文档内容，对于普通患者（非21-24岁、非妊娠期），组织病理学确诊为LSIL但细胞学≥ASC-H时，处理取决于宫颈转化区类型（TZ）： - 如果TZ类型为TZ3（转化区不可见），应进行阴道镜检查（文档片段1： "非特殊人群（普通患者）： →按转化区类型（TZ）处理： § TZ3（转化区不可见）→阴道镜检查。"）。 - 如果TZ类型为TZ1/2（转化区部分或完全可见），应进行诊断性宫颈切除术±颈管搔刮术（ECC）（文档片段1： "§ TZ1/2（转化区部分/完全可见）→诊断性宫颈切除术±颈管搔刮术（ECC）。"）。 文档中没有指定TZ类型未知时的处理，因此需先通过阴道镜评估TZ类型。此处理基于细胞学≥ASC-H的优先级，因为ASC-H提示高级别病变可能，需更积极的干预以排除浸润癌。 | A | B | A |
| **Question 22: 在宫颈癌筛查中，如果21至24岁患者组织病理学确认（活检）为LSIL，细胞学发现为ASC-H或更高级别，应该进行什么随访步骤？** | | | | |
| Chunk size=512, Overlap=0 Using TokenTextSplitter | 在宫颈癌筛查中，如果21至24岁患者组织病理学确认（活检）为LSIL，细胞学发现为ASC-H或更高级别，应该进行什么随访步骤？  回答: 根据文档上下文（相似度0.502和0.474），对于21-24岁患者（属于特殊人群），组织病理学确诊为LSIL且细胞学结果为ASC-H或更高级别（≥ASC-H）时，处理流程以阴道镜检查为首要步骤，后续根据TZ类型决定：  - 首先，应进行阴道镜检查以评估TZ类型。  - 如果阴道镜检查显示TZ3（转化区不可见），则直接行诊断性/治疗性宫颈切除术。  - 如果阴道镜检查显示TZ1/2（转化区部分或完全可见），则可进行观察随访，每10-12周复查细胞学+阴道镜，密切监测病变进展。  - 文档来源: "对于若细胞学≥ASC-H的特殊人群： § 21~24岁患者则应只进行阴道镜检查。若阴道镜检查结果为TZ3型，则应进行诊断性宫颈切除术。若阴道镜检查结果为..."（相似度0.502）和 "a.若患者为21-24岁患者，且宫颈转化区类型为TZ1/2型，则患者可进行观察（每10-12周复查）... b.若患者为21-24岁患者，且宫颈转化区类型为TZ3型，则患者应直接行诊断性/治疗性宫颈切除术..."（相似度0.474）。 | B | B | B |
| Chunk size=256, Overlap=100 Using SentenceSplitter | 在宫颈癌筛查中，如果21至24岁患者组织病理学确认（活检）为LSIL，细胞学发现为ASC-H或更高级别，应该进行什么随访步骤？  根据文档内容，对于21-24岁特殊人群，组织病理学确诊为LSIL但细胞学≥ASC-H时，应直接进行阴道镜检查，并根据阴道镜检查结果进一步处理（文档片段5： "o 对于若细胞学≥ASC-H的特殊人群： § 21~24岁患者则应只进行阴道镜检查。"）。后续步骤取决于阴道镜下的TZ类型： - 如果阴道镜检查结果为TZ3型，应进行诊断性宫颈切除术（文档片段5： "若阴道镜检查结果为TZ3型，则应进行诊断性宫颈切除术。"）。 - 如果阴道镜检查结果为TZ1或TZ2型，应每6~12周进行复查（包括细胞学和阴道镜），以密切监测并排除浸润癌；若连续两次复查阴性，则转为常规筛查（文档片段5： "若阴道镜检查结果为TZ1或TZ2型，则患者应每6~12周进行复查（密切监测，排除浸润癌）。若连续两次复查阴性则应转常规筛查。"）。 此处理针对年轻患者（21-24岁），优先考虑保守监测以避免过度治疗。 | A | A | A |
| **Question 23: 在宫颈癌筛查中，如果21至24岁患者组织病理学确认（活检）为LSIL，细胞学发现为ASC-H或更高级别，且阴道镜检查为TZ3分类，应该进行什么随访步骤？** | | | | |
| Chunk size=512, Overlap=0 Using TokenTextSplitter | 在宫颈癌筛查中，如果21至24岁患者组织病理学确认（活检）为LSIL，细胞学发现为ASC-H或更高级别，且阴道镜检查为TZ3分类，应该进行什么随访步骤？  回答: 根据文档上下文（相似度0.502和0.474），对于21-24岁患者，组织病理学确诊为LSIL、细胞学结果为ASC-H或更高级别（≥ASC-H），且阴道镜检查已确认为TZ3（转化区不可见）时，应直接行诊断性/治疗性宫颈切除术，无需额外观察。后续根据病理结果进行管理，如排除浸润癌后转入常规随访。  - 具体步骤: 直接行诊断性/治疗性宫颈切除术。  - 文档来源: "b.若患者为21-24岁患者，且宫颈转化区类型为TZ3型，则患者应直接行诊断性/治疗性宫颈切除术..."（相似度0.474）和 "对于若细胞学≥ASC-H的特殊人群： § 21~24岁患者...若阴道镜检查结果为TZ3型，则应进行诊断性宫颈切除术。"（相似度0.502）。 | B | A | A |
| Chunk size=256, Overlap=100 Using SentenceSplitter | 在宫颈癌筛查中，如果21至24岁患者组织病理学确认（活检）为LSIL，细胞学发现为ASC-H或更高级别，且阴道镜检查为TZ3分类，应该进行什么随访步骤？  根据文档内容，对于21-24岁患者，组织病理学确诊为LSIL、细胞学≥ASC-H，且阴道镜检查为TZ3型（转化区不可见）时，应直接进行诊断性宫颈切除术（文档片段5： "若阴道镜检查结果为TZ3型，则应进行诊断性宫颈切除术。"）。这是因为TZ3型表示转化区不可见，增加漏诊高级别病变或浸润癌的风险，需通过切除术获取组织样本进行确诊。文档中没有提到术后具体随访，但一般会根据组织学结果进一步管理。 | C | C | C |
| **Question 24: 在宫颈癌筛查中，如果21至24岁患者组织病理学确认（活检）为LSIL，细胞学发现为ASC-H或更高级别，且阴道镜检查为TZ1/2分类，应该进行什么随访步骤？** | | | | |
| Chunk size=512, Overlap=0 Using TokenTextSplitter | 在宫颈癌筛查中，如果21至24岁患者组织病理学确认（活检）为LSIL，细胞学发现为ASC-H或更高级别，且阴道镜检查为TZ1/2分类，应该进行什么随访步骤？  回答: 根据文档，对于21至24岁患者，组织病理学确诊为LSIL、细胞学≥ASC-H，且阴道镜检查为TZ1/2型（转化区部分或完全可见），应进行观察随访，每6-12周复查细胞学和阴道镜。如果复查中病变无进展，可继续观察；如果进展或发现浸润癌，则转诊治疗流程（如诊断性/治疗性宫颈切除术）。 - 注意: 此管理策略针对年轻患者，优先选择保守观察以减少不必要的手术干预。 | A | B | A |
| Chunk size=256, Overlap=100 Using SentenceSplitter | 在宫颈癌筛查中，如果21至24岁患者组织病理学确认（活检）为LSIL，细胞学发现为ASC-H或更高级别，且阴道镜检查为TZ1/2分类，应该进行什么随访步骤？  根据文档内容，对于21-24岁患者，组织病理学确诊为LSIL、细胞学≥ASC-H，且阴道镜检查为TZ1/2型（转化区部分或完全可见）时，应进行密切监测： - 每6~12周复查一次，包括细胞学检查和阴道镜检查，以排除浸润癌（文档片段5： "若阴道镜检查结果为TZ1或TZ2型，则患者应每6~12周进行复查（密切监测，排除浸润癌）。"）。 - 若连续两次复查结果均为阴性，则转为常规筛查（文档片段5： "若连续两次复查阴性则应转常规筛查。"）。 此处理基于TZ1/2型可见性较好，允许保守观察，避免不必要的侵入性操作。 | A | A | A |
| **Question 25: 在宫颈癌筛查中，如果妊娠患者组织病理学确认（活检）为LSIL，细胞学发现为ASC-H或更高级别，应该进行什么随访步骤？** | | | | |
| Chunk size=512, Overlap=0 Using TokenTextSplitter | 在宫颈癌筛查中，如果妊娠患者组织病理学确认（活检）为LSIL，细胞学发现为ASC-H或更高级别，应该进行什么随访步骤？  回答: 根据文档上下文（相似度0.474和0.444），对于妊娠患者，组织病理学确诊为LSIL且细胞学结果为ASC-H或更高级别（≥ASC-H）时，处理以密切观察为主，避免激进治疗，目标是排除浸润癌。具体步骤为每10-12周复查细胞学和阴道镜，密切监测；产后6-8周进行复查（细胞学+阴道镜+ECC）。如果复查未发现CIN（宫颈上皮内瘤变）或异常，则转为常规筛查；如果发现异常，则按异常处理流程进行。  - 具体步骤: 每10-12周复查细胞学+阴道镜，产后6-8周复查。  - 文档来源: "e.对于妊娠期患者，应每10-12周进行细胞学＋阴道镜检查。若未发现浸润癌，则应推迟至产后6-8周复查（细胞学+阴道镜+ECC）。"（相似度0.474）和 "妊娠期患者→应进入进行密切观察： • 每10~12周复查（密切监测，排除浸润癌）。产后6-8周进行复查。若复查出现异常，则应该按照异常处理流程进行处理。若复查并未发现CIN，则患者后续应转为常规筛查"（相似度0.444）。  所有回答均基于提供的文档片段，确保符合上下文信息。如果某个细节未在文档中明确覆盖（如问题21中的TZ类型未指定），我依据文档描述的流程进行了推断。 | B | A | A |
| Chunk size=256, Overlap=100 Using SentenceSplitter | 在宫颈癌筛查中，如果妊娠患者组织病理学确认（活检）为LSIL，细胞学发现为ASC-H或更高级别，应该进行什么随访步骤？  根据文档内容，对于妊娠患者，无论组织病理学级别（包括LSIL）或细胞学结果（如≥ASC-H），主要目标是排除浸润癌，处理以保守监测为主： - 应每10~12周进行一次复查，包括细胞学检查和阴道镜检查（文档片段4： "e.对于妊娠期患者，应每10-12周进行细胞学＋阴道镜检查。" 和 文档片段5： "妊娠期患者→应进入进行密切观察： • 每10~12周复查（密切监测，排除浸润癌）。"）。 - 若未发现浸润癌，应推迟至产后6-8周进行复查，复查内容包括细胞学、阴道镜和颈管搔刮术（ECC）（文档片段4： "若未发现浸润癌，则应推迟至产后6-8周复查（细胞学+阴道镜+ECC）。"）。 - 产后复查若无CINⅡ或更高级别病变，转为常规筛查；若发现异常，则按异常处理流程进行（文档片段4： "-若产后复查无CINⅡ+患者后续应进行常规筛查 -若产后复查出现CINII+→则应进行诊断性/治疗性宫颈切除术，后续流程如前所述。"）。 此处理优先考虑妊娠安全，避免在孕期进行侵入性操作。 | A | A | A |
| **Question 26: 在宫颈癌筛查中，如果患者组织病理学确认（活检）为HSIL且TZ1/2分类，应该进行什么随访步骤？** | | | | |
| Chunk size=512, Overlap=0 Using TokenTextSplitter | 在宫颈癌筛查中，如果患者组织病理学确认（活检）为HSIL且TZ1/2分类，应该进行什么随访步骤？  回答：   根据文档上下文（例如相似度0.556和0.517的片段），对于普通患者（非21-24岁，非妊娠期），组织病理学确诊为HSIL（包括CIN II、CIN II/III、CIN III等）且转化区类型为TZ1/2（转化区完全或部分可见）时：   - 首选处理：应进行诊断性/治疗性宫颈切除术。如果满足消融治疗适应证（如病变范围小、无浸润迹象），可慎重选择宫颈消融治疗。   - 术后随访步骤：   - 如果术后病理切缘阴性（无CIN II及以上病变），则在4-6个月后复查（包括细胞学检查、阴道镜检查和宫颈管搔刮术ECC）。   - 如果术后病理切缘阳性（切缘组织病理学报告为CIN II及以上），则在4-6个月后复查细胞学、阴道镜和ECC，并根据复查结果按相应级别病变处理（如进展则转治疗流程）。   - 如果术中发现可疑浸润癌，立即送病理确诊，如确诊则转入宫颈癌治疗流程。   - 依据：文档中多次强调此流程（例如，“对于组织病理学确诊HSIL，宫颈转化区类型为TZ1/2则患者应首选诊断性/治疗性宫颈切除术”）。 | A | B | A |
| Chunk size=256, Overlap=100 Using SentenceSplitter | 在宫颈癌筛查中，如果患者组织病理学确认（活检）为HSIL且TZ1/2分类，应该进行什么随访步骤？  基于文档内容：  - 对于普通患者（非21-24岁，非妊娠期），如果组织病理学确诊为HSIL（包括CINⅡ、CINⅡ/Ⅲ、CINⅢ、CINⅡ/P16(+)）且转化区类型为TZ1/2（转化区完全或部分可见），应首选诊断性/治疗性宫颈切除术（[相似度: 0.564]）。  - 术后随访步骤：   - 如果术后病理切缘阴性（无残留病变），应在4-6个月后复查（细胞学 + 阴道镜 + 宫颈管搔刮术/ECC）。   - 如果术后病理切缘阳性（切缘组织病理学报告CINⅡ及以上），应在4-6个月后复查细胞学、阴道镜和ECC，并根据复查结果按照相应级别病变进行处理（[相似度: 0.484] 和 [相似度: 0.471]）。  - 如果患者满足消融治疗适应证（如病变较小、无浸润证据），可慎重选择宫颈消融治疗，但首选仍是切除术（[相似度: 0.564]）。  综上，随访步骤为：首选诊断性/治疗性宫颈切除术，术后根据切缘情况安排4-6个月复查（细胞学 + 阴道镜 + ECC），并根据结果调整后续管理。 | A | A | A |
| **Question 27: 在宫颈癌筛查中，如果患者组织病理学确认（活检）为HSIL且TZ3分类，应该进行什么随访步骤？** | | | | |
| Chunk size=512, Overlap=0 Using TokenTextSplitter | 在宫颈癌筛查中，如果患者组织病理学确认（活检）为HSIL且TZ3分类，应该进行什么随访步骤？  回答：   根据文档上下文（例如相似度0.556和0.517的片段），对于普通患者（非21-24岁，非妊娠期），组织病理学确诊为HSIL且转化区类型为TZ3（转化区不可见）时：   - 首选处理：应直接行诊断性/治疗性宫颈切除术（不可选择消融治疗）。   - 术后随访步骤：   - 如果术后病理切缘阴性，则在4-6个月后复查（包括细胞学检查、阴道镜检查和ECC）。   - 如果术后病理切缘阳性（CIN II及以上），则在4-6个月后复查细胞学、阴道镜和ECC，并根据复查结果按相应级别病变处理。   - 如果术中发现可疑浸润癌，立即送病理确诊，如确诊则转入宫颈癌治疗流程。   - 依据：文档明确指出“若患者织病理学确诊HSIL，宫颈转化区类型为TZ3则患者应直接行诊断性/治疗性宫颈切除术（不可选择消融治疗）”。 | A | A | A |
| Chunk size=256, Overlap=100 Using SentenceSplitter | 在宫颈癌筛查中，如果患者组织病理学确认（活检）为HSIL且TZ3分类，应该进行什么随访步骤？  基于文档内容：  - 对于普通患者（非21-24岁，非妊娠期），如果组织病理学确诊为HSIL且转化区类型为TZ3（转化区不可见），应直接行诊断性/治疗性宫颈切除术（不可选择消融治疗）（[相似度: 0.564]）。  - 术后随访步骤：   - 如果术后病理切缘阴性，应在4-6个月后复查（细胞学 + 阴道镜 + ECC）。   - 如果术后病理切缘阳性（CINⅡ及以上），应在4-6个月后复查细胞学、阴道镜和ECC，并根据复查结果按照相应级别病变进行处理（[相似度: 0.484]）。  - 文档强调TZ3类型不可选择观察或消融治疗，必须直接手术（[相似度: 0.564]）。  综上，随访步骤为：直接行诊断性/治疗性宫颈切除术，术后根据切缘情况安排4-6个月复查（细胞学 + 阴道镜 + ECC），并根据结果调整后续管理。 | A | A | A |
| **Question 28: 在宫颈癌筛查中，如果21至24岁患者组织病理学确认（活检）为CIN III/HSIL（宫颈上皮内瘤变III级/高度鳞状上皮内病变），应该进行什么随访步骤？** | | | | |
| Chunk size=512, Overlap=0 Using TokenTextSplitter | 在宫颈癌筛查中，如果21至24岁患者组织病理学确认（活检）为CIN III/HSIL（宫颈上皮内瘤变III级/高度鳞状上皮内病变），应该进行什么随访步骤？  回答：   根据文档上下文（例如相似度0.574和0.517的片段），对于21-24岁患者，组织病理学确诊为CIN III/HSIL时，处理取决于转化区类型（TZ）：   - 如果转化区类型为TZ1/2型：   - 可选择观察随访（非手术治疗）。   - 随访步骤：每10-12周复查细胞学检查和阴道镜检查。   - 如果持续无进展（病变未加重），可继续观察。   - 如果病变进展或发现浸润癌，应行诊断性/治疗性宫颈切除术，术后流程如前所述（如切缘阴性时4-6个月复查）。   - 如果转化区类型为TZ3型：   - 应直接行诊断性/治疗性宫颈切除术。   - 术后随访步骤：同问题27（切缘阴性时4-6个月复查；切缘阳性时4-6个月复查并根据结果处理）。   - 依据：文档明确说明“对于组织病理学确诊为CIN III/HSIL的21-24岁患者 → 若转化区类型为TZ1/2型，可选择观察（每10-12周复查细胞学+阴道镜）...若转化区类型为TZ3型，应直接行诊断性/治疗性宫颈切除术”。 | A | A | A |
| Chunk size=256, Overlap=100 Using SentenceSplitter | 在宫颈癌筛查中，如果21至24岁患者组织病理学确认（活检）为CIN III/HSIL（宫颈上皮内瘤变III级/高度鳞状上皮内病变），应该进行什么随访步骤？  基于文档内容：  - 文档明确区分了21-24岁患者的处理方案，根据转化区类型（TZ）决定随访步骤：   - 如果转化区类型为TZ1/2（转化区完全或部分可见）：可选择观察（每10-12周复查细胞学 + 阴道镜）。   - 若病变持续无进展，可继续观察。   - 若病变进展或发现浸润癌，应行诊断性/治疗性宫颈切除术（[相似度: 0.603]）。   - 如果转化区类型为TZ3（转化区不可见）：应直接行诊断性/治疗性宫颈切除术（[相似度: 0.603]）。  - 术后随访（如果进行手术）：   - 如果切缘阴性，4-6个月后复查（细胞学 + 阴道镜 + ECC）。   - 如果切缘阳性，4-6个月后复查细胞学、阴道镜和ECC，并根据结果处理（[相似度: 0.484]）。  综上，随访步骤取决于TZ类型：TZ1/2可选择观察（每10-12周复查细胞学 + 阴道镜），TZ3则直接手术，术后按标准流程复查。 | A | A | A |
| **Question 29: 在宫颈癌筛查中，如果21至24岁患者组织病理学确认（活检）为HSIL且阴道镜检查为TZ3分类，应该进行什么随访步骤？** | | | | |
| Chunk size=512, Overlap=0 Using TokenTextSplitter | 在宫颈癌筛查中，如果21至24岁患者组织病理学确认（活检）为HSIL且阴道镜检查为TZ3分类，应该进行什么随访步骤？  回答：   根据文档上下文（例如相似度0.574和0.517的片段），对于21-24岁患者，组织病理学确诊为HSIL且阴道镜检查为TZ3分类（转化区不可见）时：   - 首选处理：应直接行诊断性/治疗性宫颈切除术（不可选择观察或消融治疗）。   - 术后随访步骤：   - 如果术后病理切缘阴性，则在4-6个月后复查（包括细胞学检查、阴道镜检查和ECC）。   - 如果术后病理切缘阳性（CIN II及以上），则在4-6个月后复查细胞学、阴道镜和ECC，并根据复查结果按相应级别病变处理。   - 如果术中发现可疑浸润癌，立即送病理确诊，如确诊则转入宫颈癌治疗流程。   - 依据：文档指出“若患者为21-24岁患者，且宫颈转化区类型为TZ3型，则患者应直接行诊断性/治疗性宫颈切除术”，并适用于HSIL病例。 | A | A | A |
| Chunk size=256, Overlap=100 Using SentenceSplitter | 在宫颈癌筛查中，如果21至24岁患者组织病理学确认（活检）为HSIL且阴道镜检查为TZ3分类，应该进行什么随访步骤？  基于文档内容：  - 对于21-24岁患者，如果组织病理学确诊为HSIL（包括CIN III/HSIL）且阴道镜检查为TZ3分类（转化区不可见），应直接行诊断性/治疗性宫颈切除术（[相似度: 0.603] 和 [相似度: 0.591]）。  - 文档强调TZ3类型不可选择观察，必须直接手术（[相似度: 0.603]）。  - 术后随访步骤：   - 如果术后病理切缘阴性，应在4-6个月后复查（细胞学 + 阴道镜 + ECC）。   - 如果术后病理切缘阳性（CINⅡ及以上），应在4-6个月后复查细胞学、阴道镜和ECC，并根据复查结果按照相应级别病变进行处理（[相似度: 0.484]）。  综上，随访步骤为：直接行诊断性/治疗性宫颈切除术，术后根据切缘情况安排4-6个月复查（细胞学 + 阴道镜 + ECC），并根据结果调整后续管理。 | A | A | A |
| **Question 30: 在宫颈癌筛查中，如果21至24岁患者组织病理学确认（活检）为CIN II/III/HSIL或CIN II/HSIL且阴道镜检查为TZ1/2分类，应该进行什么随访步骤？** | | | | |
| Chunk size=512, Overlap=0 Using TokenTextSplitter | 在宫颈癌筛查中，如果21至24岁患者组织病理学确认（活检）为CIN II/III/HSIL或CIN II/HSIL且阴道镜检查为TZ1/2分类，应该进行什么随访步骤？  回答：   根据文档上下文（例如相似度0.574的片段），对于21-24岁患者，组织病理学确诊为CIN II/III/HSIL或CIN II/HSIL且阴道镜检查为TZ1/2分类（转化区完全或部分可见）时：   - 首选处理：可选择观察随访（非手术治疗）。   - 随访步骤：每10-12周复查细胞学检查和阴道镜检查。   - 如果持续无进展（病变未加重），可继续观察。   - 如果病变进展或发现浸润癌，应行诊断性/治疗性宫颈切除术，术后流程如前所述（如切缘阴性时4-6个月复查；切缘阳性时4-6个月复查并根据结果处理）。   - 依据：文档明确说明“对于组织病理学确诊为CIN II/III/HSIL或CIN II/HSIL且阴道镜检查为TZ1/2分类的21-24岁患者 → 可选择观察（每10-12周复查细胞学+阴道镜）...若持续无进展，可继续观察；若病变进展或发现浸润癌，应行诊断性/治疗性宫颈切除术”。 | A | A | A |
| Chunk size=256, Overlap=100 Using SentenceSplitter | 在宫颈癌筛查中，如果21至24岁患者组织病理学确认（活检）为CIN II/III/HSIL或CIN II/HSIL且阴道镜检查为TZ1/2分类，应该进行什么随访步骤？  基于文档内容：  - 对于21-24岁患者，如果组织病理学确诊为CIN II/III/HSIL或CIN II/HSIL且阴道镜检查为TZ1/2分类（转化区完全或部分可见），可选择观察（每10-12周复查细胞学 + 阴道镜）（[相似度: 0.603]）。  - 观察期间的管理：   - 若病变持续无进展（无变化或消退），可继续观察。   - 若病变进展或发现浸润癌，应行诊断性/治疗性宫颈切除术（[相似度: 0.603] 和 [相似度: 0.591]）。  - 如果选择手术（如病变进展），术后随访：   - 切缘阴性时，4-6个月后复查（细胞学 + 阴道镜 + ECC）。   - 切缘阳性时，4-6个月后复查细胞学、阴道镜和ECC，并根据结果处理（[相似度: 0.484]）。  综上，随访步骤为：可选择观察（每10-12周复查细胞学 + 阴道镜），若病变稳定则继续观察；若进展或发现浸润癌，则行诊断性/治疗性宫颈切除术，术后按标准流程复查。   总结说明 - 所有回答均严格基于提供的文档片段，未添加外部知识。文档中所有相关信息均已引用相似度分数最高的上下文。 - 对于每个问题，文档均有明确指导，因此未出现“知识库中未找到答案”的情况。 - 作为妇科专家，我建议在实际临床实践中，这些方案需结合患者具体情况（如妊娠状态、依从性等）和最新指南进行个体化调整。如果您有更多细节或后续问题，欢迎提供。  # | B | A | A |
| **Question 31: 在宫颈癌筛查中，如果妊娠患者组织病理学确认（活检）为HSIL，应该进行什么随访步骤？** | | | | |
| Chunk size=512, Overlap=0 Using TokenTextSplitter | 在宫颈癌筛查中，如果妊娠患者组织病理学确认（活检）为HSIL，应该进行什么随访步骤？  在文档中，针对妊娠期患者组织病理学确认为HSIL（高度鳞状上皮内病变，包括CINⅡ、CINⅡ/Ⅲ、CINⅢ等）的情况，提供了明确的随访步骤。根据上下文（例如相似度0.461和0.439的片段），妊娠期HSIL患者的首要目标是排除浸润癌，因此推荐密切监测而非立即治疗。随访步骤包括：  - 妊娠期间：每10-12周进行一次细胞学检查（如巴氏涂片）和阴道镜检查，以监测病变进展和排除浸润癌。  - 如果未发现浸润癌：随访应推迟至产后6-8周进行复查，复查内容包括细胞学检查、阴道镜检查和宫颈管搔刮术（ECC）。  - 如果妊娠期间检查发现可疑浸润癌：患者应立即行诊断性/治疗性宫颈切除术，并转入宫颈癌治疗流程。   此信息基于文档中多次提及的妊娠期管理原则（例如：“对于妊娠期患者，应每10-12周进行细胞学＋阴道镜检查。若未发现浸润癌，则应推迟至产后6-8周复查（细胞学+阴道镜+ECC）。”）。 | A | A | A |
| Chunk size=256, Overlap=100 Using SentenceSplitter | 在宫颈癌筛查中，如果妊娠患者组织病理学确认（活检）为HSIL，应该进行什么随访步骤？  基于文档内容： - 文档明确指出，妊娠患者组织病理学确诊为HSIL（包括CINⅡ、CINⅡ/Ⅲ、CINⅢ或CINⅡ/P16(+)）时，主要目标是排除浸润癌。妊娠期间无浸润癌证据时，应进行密切监测。 - 具体随访步骤包括：  - 每10-12周复查一次细胞学（如巴氏涂片）和阴道镜检查，以评估病变进展和排除浸润癌。  - 如果复查未发现浸润癌，随访应持续至产后。 - 文档强调，妊娠期不推荐立即进行诊断性或治疗性宫颈切除术（如锥切），因为可能增加并发症风险（如出血或流产），除非有可疑浸润癌证据。 - 相关文档片段："对于妊娠期女性，无论是宫颈低级别病变或高级别病变的管理中主要目标是除外宫颈癌。妊娠女性若无浸润癌证据，可每10～12周复查细胞学或阴道镜观察，产后6～8周复查。" 和 "对于妊娠期患者，应每10-12周进行细胞学＋阴道镜检查。若未发现浸润癌，则应推迟至产后6-8周复查（细胞学+阴道镜+ECC）。"  总结回答：妊娠患者HSIL的随访步骤为每10-12周进行一次细胞学和阴道镜检查，以排除浸润癌；产后6-8周需复查（细胞学+阴道镜+ECC）。如果期间发现可疑浸润癌，则需行诊断性/治疗性宫颈切除术。  # | A | A | A |
| **Question 32: 宫颈癌诊断性/治疗性宫颈锥切术后，应该进行什么随访步骤？** | | | | |
| Chunk size=512, Overlap=0 Using TokenTextSplitter | 宫颈癌诊断性/治疗性宫颈锥切术后，应该进行什么随访步骤？  在文档中，宫颈锥切术（包括诊断性或治疗性）后的随访步骤取决于术后病理切缘的状态。根据上下文（例如相似度0.461的片段），具体随访流程如下：  - 如果术后病理切缘阴性（无CINⅡ及以上病变）：在术后4-6个月进行复查，内容包括细胞学检查、阴道镜检查和宫颈管搔刮术（ECC）。复查结果正常后，可转入常规筛查。  - 如果术后病理切缘阳性（切缘组织病理学报告为CINⅡ及以上）：同样在术后4-6个月进行复查，内容包括细胞学检查、阴道镜检查和ECC。复查结果需根据病变级别（如CIN或浸润癌）进行相应处理（例如，如果复查显示持续HSIL，可能需要重复锥切或子宫切除）。  - 如果术中发现可疑浸润癌：立即送病理确诊，如确诊则转入宫颈癌治疗流程。   此信息基于文档中对宫颈锥切术后管理的详细描述（例如：“若患者诊断性/治疗性宫颈切除术后病理切缘阴性：4-6月后复查（细胞学+阴道镜+ECC）”；“若切缘阳性：则应在4-6个月后复查细胞学，阴道镜，ECC。”）。 | A | A | A |
| Chunk size=256, Overlap=100 Using SentenceSplitter | 宫颈癌诊断性/治疗性宫颈锥切术后，应该进行什么随访步骤？  基于文档内容： - 宫颈锥切术（如LEEP或冷刀锥切）后的随访步骤取决于术后病理结果，特别是切缘状态（阴性或阳性）。 - 切缘阴性（无残留病变）：  - 术后4-6个月复查细胞学联合HPV检测、阴道镜评估和颈管搔刮术（ECC）。  - 如果复查无异常，后续建议每6-12个月进行细胞学和HPV检测复查；连续两次阴性后，可转为每3年复查一次。  - 长期随访建议持续20年，以监测复发。 - 切缘阳性（残留CINⅡ及以上病变）：  - 术后4-6个月复查细胞学、阴道镜评估和ECC。  - 根据复查结果（如病变级别），按相应管理流程处理（如重复切除术或全子宫切除术）。 - 如果术中发现可疑浸润癌，应立即送病理确诊，并转入宫颈癌治疗流程。 - 相关文档片段："若患者诊断性/治疗性宫颈切除术后病理切缘阴性：4-6月后复查（细胞学+阴道镜+ECC）" 和 "切缘组织病理学报告 CINⅡ及以上 HSIL 治疗后患者建议采用细胞学联合 HPV 检测的方法随诊20 年。经过质量控制的术后病理诊断若切缘存在 HSIL 病变，建议术后 4 ～6 月复查并阴道镜评估。"  总结回答：锥切术后随访步骤为：切缘阴性则术后4-6个月复查细胞学+HPV检测+阴道镜+ECC；切缘阳性则术后4-6个月复查相同项目，并根据结果处理。长期随访需持续20年。  # | A | A | A |
| **Question 33: 在宫颈癌筛查中，如果妊娠患者组织病理学确认（活检）为HSIL，妊娠期间无浸润性癌症，分娩后应该进行什么随访步骤？** | | | | |
| Chunk size=512, Overlap=0 Using TokenTextSplitter | 在宫颈癌筛查中，如果妊娠患者组织病理学确认（活检）为HSIL，妊娠期间无浸润性癌症，分娩后应该进行什么随访步骤？  在文档中，针对妊娠期HSIL患者（妊娠期间无浸润癌）的分娩后随访，提供了明确步骤。根据上下文（例如相似度0.461和0.439的片段），产后随访旨在评估病变是否消退或进展：  - 分娩后6-8周：进行复查，内容包括细胞学检查、阴道镜检查和宫颈管搔刮术（ECC）。  - 复查结果处理：   - 如果复查未发现CINⅡ及以上病变（即无异常），患者后续应转为常规宫颈癌筛查（例如每3-5年进行一次细胞学或HPV检测）。   - 如果复查发现CINⅡ及以上病变（如持续HSIL），则应按相应级别病变处理（例如行诊断性/治疗性宫颈切除术）。  - 特殊说明：妊娠期HSIL患者产后病变可能自然消退，因此产后复查是关键；如果妊娠期间已进行监测且无进展，产后复查是标准流程。   此信息基于文档中的产后管理描述（例如：“产后6-8周进行复查。若复查出现异常，则应该按照异常处理流程进行处理。若复查并未发现CIN，则患者后续应转为常规筛查。”）。 | A | A | A |
| Chunk size=256, Overlap=100 Using SentenceSplitter | 在宫颈癌筛查中，如果妊娠患者组织病理学确认（活检）为HSIL，妊娠期间无浸润性癌症，分娩后应该进行什么随访步骤？  基于文档内容： - 妊娠患者HSIL在妊娠期间无浸润癌时，分娩后的随访步骤已明确。 - 分娩后6-8周进行复查，内容包括：  - 细胞学检查（如巴氏涂片）。  - 阴道镜检查。  - 颈管搔刮术（ECC）。 - 复查结果处理：  - 如果复查无异常（无CINⅡ及以上病变），患者应转为常规宫颈癌筛查（如每3年一次细胞学或HPV检测）。  - 如果复查发现异常（如CINⅡ+），则需行诊断性/治疗性宫颈切除术，并按相应流程管理。 - 文档强调，产后复查是必要的，因为妊娠期病变可能在产后自然消退或进展。 - 相关文档片段："产后6-8周进行复查。若复查出现异常，则应该按照异常处理流程进行处理。若复查并未发现CIN，则患者后续应转为常规筛查" 和 "产后6～8周复查（细胞学+阴道镜+ECC）。-若产后复查无CINⅡ+患者后续应进行常规筛查 -若产后复查出现CINII+→则应进行诊断性/治疗性宫颈切除术。"  总结回答：分娩后6-8周复查细胞学+阴道镜+ECC。若无异常（无CINⅡ+），转为常规筛查；若有异常，行诊断性/治疗性宫颈切除术并按病变级别处理。  # | A | A | A |
| **Question 34: HPV疫苗使用策略是什么？不同年龄组推荐的疫苗接种方案是什么？** | | | | |
| Chunk size=512, Overlap=0 Using TokenTextSplitter | HPV疫苗使用策略是什么？不同年龄组推荐的疫苗接种方案是什么？  在文档中，HPV疫苗的使用策略和不同年龄组的接种方案有详细说明。根据上下文（例如相似度0.588和0.509的片段），策略重点针对性活动前的青少年，以预防HPV感染和宫颈癌：  - HPV疫苗使用策略：   - 作为宫颈癌一级预防，重点针对开始性活动之前的女性，尤其是10-14岁女孩。   - 疫苗类型包括二价（针对HPV16和18）、四价（针对HPV16、18、6和11）和九价（针对HPV6、11、16、18、31、33、45、52、58）。这些疫苗由病毒样颗粒（VLPs）组成，无传染性。   - WHO数据显示HPV疫苗安全性良好。  - 不同年龄组推荐的疫苗接种方案：   - 9-14岁的儿童（包括女孩和男孩）：推荐使用2针方案，注射时间点为第0个月和第5-13个月（例如，间隔5-13个月）。如果第二针在第一针后5个月内注射，建议加用第三针。   - 15岁以上人群及免疫力低下者（无论年龄）：推荐使用3针方案，注射时间点为第0、1和6个月（例如，0.5mL剂量）。  - 总体原则：疫苗接种应在性活动开始前完成，以最大化预防效果。   此信息基于文档中对HPV疫苗的专门描述（例如：“对于9~14岁的女孩和男孩，建议使用2针方案（0.5mL, 0和5～13个月）。...对于15岁以上和免疫力低下的人，则无论年龄大小，建议使用3针方案（0.5mL, 0,1,6个月）。”）。 | A | A | A |
| Chunk size=256, Overlap=100 Using SentenceSplitter | HPV疫苗使用策略是什么？不同年龄组推荐的疫苗接种方案是什么？  基于文档内容： - HPV疫苗策略是宫颈癌一级预防的核心，重点针对未开始性活动的青少年，以预防HPV感染和相关癌前病变。 - 疫苗类型：有三种预防性HPV疫苗：  - 二价疫苗：针对HPV 16和18型（主要致宫颈癌）。  - 四价疫苗：针对HPV 6、11、16和18型（额外预防肛门生殖器疣）。  - 九价疫苗：针对HPV 6、11、16、18、31、33、45、52、58型（覆盖更多高危型）。 - 不同年龄组接种方案：  - 9-14岁青少年（女孩和男孩）：推荐2针方案，剂量为0.5 mL，注射间隔为0和5-13个月。如果第二针在第一针后5个月内注射，需加用第三针。  - 15岁以上人群及免疫力低下者（无论年龄）：推荐3针方案，剂量为0.5 mL，注射间隔为0、1和6个月。 - 文档指出，疫苗由病毒样颗粒（VLPs）组成，无传染性，且WHO数据证实其安全性良好。 - 相关文档片段："对于$9 \sim 1 4$ 岁的女孩和男孩，建议使用 2 针方案（0.5$\mathrm { \ m L , 0 }$ 和5～13 个月）。如果第二针是在第一针之后5个月内注射者，则建议加用第3针。对于15岁以上和免疫力低下的人，则无论年龄大小，建议使用3 针方案 $( 0 . 5 \mathrm { m L } , 0 , 1 , 6$ 个月）。WHO 目前数据显示HPV疫苗不存在安全性问题。"  总结回答：HPV疫苗策略为预防性接种，针对9-14岁青少年用2针方案（间隔0和5-13个月），15岁以上及免疫力低下者用3针方案（间隔0、1、6个月）。疫苗类型包括二价、四价和九价，重点覆盖高危HPV型别。  # | A | A | A |
| **Question 35: HPV初筛是否适用于低收入国家？如果是，为什么？** | | | | |
| Chunk size=512, Overlap=0 Using TokenTextSplitter | HPV初筛是否适用于低收入国家？如果是，为什么？  在文档中，HPV初筛（即以HPV检测作为宫颈癌筛查的初始方法）被明确推荐适用于低收入国家。根据上下文（例如相似度0.509的片段），原因包括其高效性、简单性和成本效益：  - 是否适用：是，HPV初筛适用于低收入国家。  - 为什么：   - 更高的敏感性和阴性预测值：HPV检测比传统细胞学（如巴氏涂片）更敏感，能更准确地识别高危人群，减少漏诊。阴性结果可提供高置信度，允许延长筛查间隔（例如一生仅筛查1次），这在资源有限地区尤为重要。   - 可行性和简单性：HPV检测操作简单，不需要高度专业化的实验室或人员，易于在基层医疗中实施。文档提到，醋酸肉眼试验（VIA）等辅助方法在低收入国家（如撒哈拉以南非洲）已广泛使用，与HPV初筛结合可提高效率。   - 成本效益和可接受性：HPV初筛减少了筛查频率和后续检查需求，降低了总体成本。文档强调，筛查策略应“可行、简单、准确、可接受、最高危的女性容易使用”，HPV初筛符合这些原则，尤其适合社会经济欠发达地区。  - 额外说明：在低收入国家，HPV初筛可替代细胞学作为首选方法，结合疫苗接种，有助于消灭宫颈癌。   此信息基于文档中对宫颈癌筛查策略的讨论（例如：“HPV检测及醋酸肉眼试验用于贫困地区的筛查具有更高效率。”；“在低收入国家，一生可仅筛查1次。”；“不同国家应选择因地制宜的宫颈癌筛查方法。”）。 | A | A | A |
| Chunk size=256, Overlap=100 Using SentenceSplitter | HPV初筛是否适用于低收入国家？如果是，为什么？  基于文档内容： - HPV初筛适用于低收入国家。 - 原因：  - HPV检测作为初筛方法具有更高的敏感性和阴性预测值，能更准确地识别高危人群，减少漏诊。  - 它允许延长筛查间隔（如每5年或更长），甚至在资源有限的情况下，可实现"一生仅筛查1次"，这降低了筛查频率和成本。  - 在低收入国家（如撒哈拉以南非洲），HPV初筛比传统方法（如细胞学）更可行、简单、可接受，因为它不需要高级实验室设施，易于在基层实施。  - 文档强调，不同国家应选择"因地制宜"的筛查策略，HPV初筛符合"可行、简单、准确、可接受、最高危女性容易使用"的原则。 - 相关文档片段："许多医疗保健系统正开始改用HPV 初筛。这种筛查具有更高的敏感性和阴性预测值，允许延长筛查间隔，甚至在低收入国家，一生可仅筛查1 次。" 和 "不同国家应选择因地制宜的宫颈癌筛查方法。选择筛查策略原则是可行、简单、准确、可接受、最高危的女性容易使用。"  总结回答：HPV初筛适用于低收入国家，因为它具有高敏感性和阴性预测值，允许延长筛查间隔（如一生一次），降低了资源需求，符合简单、可行、可接受的原则，尤其适合资源匮乏地区。 | A | B | A |
| **Question 36: 在低收入国家，特别是撒哈拉以南非洲，广泛使用哪些宫颈癌筛查方法？** | | | | |
| Chunk size=512, Overlap=0 Using TokenTextSplitter | 在低收入国家，特别是撒哈拉以南非洲，广泛使用哪些宫颈癌筛查方法？  在低收入国家，特别是撒哈拉以南非洲地区，广泛使用的宫颈癌筛查方法是醋酸染色肉眼观察（VIA）。文档中提到：“VIA 是在宫颈上涂布新鲜制备的 $3 \%$ ～$5 \%$ 醋酸 $1 ~ \mathrm { m i n }$ 后观察醋白病灶。在撒哈拉非洲以南的低收入国家已广泛实施。” 这强调了VIA作为一种简单、经济且易于实施的筛查方法，在资源有限地区被广泛采用。 | A | C | A |
| Chunk size=256, Overlap=100 Using SentenceSplitter | 在低收入国家，特别是撒哈拉以南非洲，广泛使用哪些宫颈癌筛查方法？  在文档中，明确提到在低收入国家，特别是撒哈拉以南非洲地区，广泛使用的宫颈癌筛查方法是VIA（冰醋酸染色后用肉眼观察）。具体描述为：VIA是在宫颈上涂布新鲜制备的3%～5%醋酸1分钟后观察醋白病灶，该方法已在撒哈拉以南非洲的低收入国家广泛实施（相似度0.404片段）。文档还强调，不同国家应选择因地制宜的筛查方法，原则是可行、简单、准确、可接受，且最高危女性容易使用。因此，VIA是撒哈拉以南非洲地区的主要筛查工具。 | B | B | B |
| **Question 37: HPV检测质量控制管理专家共识中包含的关键指标有哪些？** | | | | |
| Chunk size=512, Overlap=0 Using TokenTextSplitter | HPV检测质量控制管理专家共识中包含的关键指标有哪些？  HPV检测质量控制管理专家共识中包含的关键指标包括以下内容（基于文档中描述的质控方案）： - TBS各级判读的阳性检出率：要求基于超过5000例样本的统计量进行评估。 - ASC/SIL比值：理想范围为1.5～3.0，表示质控良好。 - 不同细胞学分级的高危型HPV阳性率：具体包括：  - ASC-US：20%～40%  - ASC-H：40%～60%  - LSIL：50%～70%  - HSIL：70%～90%  - 阳性率超过90%被视为良好。 - 细胞学阳性标本与组织学确诊结果的符合率：要求基于超过100例细胞学阳性标本（包括ASC-US、ASC-H、LSIL、HSIL、SCC、AGC、AIS），与最终组织病理学诊断（如宫颈切除术或子宫切除术结果）的符合率进行评估。 这些指标旨在确保HPV检测的准确性和一致性，文档来源为CSCCP专家共识对细胞病理学质控的描述。 | B | A | B |
| Chunk size=256, Overlap=100 Using SentenceSplitter | HPV检测质量控制管理专家共识中包含的关键指标有哪些？  文档中提到了HPV检测质量控制管理的关键指标，主要来自CSCCP专家共识（相似度0.291片段）。具体指标包括：  - TBS各级判读的阳性检出率：需基于>5000例样本的统计量进行评估。  - 非典型鳞状上皮细胞/鳞状上皮内病变（ASC/SIL）比值：理想范围为1.5～3.0，该比值用于评价诊断的准确性（比值在此范围内表示质控良好）。  - 阳性标本与组织学最终确诊结果的符合率：指细胞学阳性标本（如ASC-US、ASC-H、LSIL等）与组织病理学诊断结果的符合程度。  - 阳性病例的随访登记制度和随访比例：要求建立随访制度并跟踪随访比例。  - 现场督察：包括随机抽取连续10～20例阳性病例、20～30例阴性病例、20例室间质控标准片进行现场考核。  这些指标旨在加强HPV检测的质控，确保筛查结果的可靠性。 | A | A | A |
| **Question 38: ASC-US和ASC-H在临床管理上有什么区别？** | | | | |
| Chunk size=512, Overlap=0 Using TokenTextSplitter | ASC-US和ASC-H在临床管理上有什么区别？  ASC-US（不明确意义的非典型鳞状上皮细胞）和ASC-H（非典型鳞状上皮细胞不除外高度鳞状上皮内病变）在临床管理上有显著区别，基于文档中的处理流程： - ASC-US的管理：通常进行HPV检测分流。如果HPV检测阳性（不分型或分型检测HPV16/18阳性），则转诊阴道镜检查；如果HPV阴性，则建议1年后复查细胞学。如果无法进行HPV检测，则直接转诊阴道镜检查。文档指出：“ASC-US 使用HPV 进行分流，如果 HPV 阳性( 不分型) 或 HPV 分型检测 HPV16、18 阳性，均应转诊阴道镜检查。” - ASC-H的管理：直接转诊阴道镜检查，无需先进行HPV检测。因为ASC-H的细胞改变具有HSIL的特征，被诊断为CIN II/III的概率较高（24%～94%），文档强调：“ASC-H 的细胞改变具有 HSIL 的特征，被诊断 CIN $\mathbb { I } / \mathbb { I }$ 的概率为 $2 4 \% \sim$ $9 4 \%$”，因此需立即阴道镜检查。 总之，ASC-US依赖HPV检测分流，而ASC-H直接进入阴道镜检查，反映了其更高的癌变风险。 | A | A | A |
| Chunk size=256, Overlap=100 Using SentenceSplitter | ASC-US和ASC-H在临床管理上有什么区别？  文档详细描述了ASC-US（意义不明的非典型鳞状细胞）和ASC-H（非典型鳞状细胞，不除外高度鳞状上皮内病变）在临床管理上的区别（相似度0.427、0.338、0.278等片段）：  - ASC-US：   - 诊断重复性差，易发生诊断不足或过度诊断，在人群中发生率约5%，在异常涂片中占50%以上（相似度0.427片段）。   - 管理策略：通常使用HPV检测进行分流。如果HPV阳性（不分型或分型检测HPV16/18阳性），应转诊阴道镜检查；如果HPV阴性，则建议1年后复查细胞学（相似度0.338片段）。无法进行HPV检测时，直接转诊阴道镜。   - 风险：ASC-US女性中高危型HPV感染率为31%～60%，最终被诊断为CIN II/III的概率<10%，浸润癌风险仅为0.1%～0.2%。  - ASC-H：   - 细胞改变具有HSIL（高度鳞状上皮内病变）的特征，被诊断为CIN II/III的概率较高（24%～94%）（相似度0.338片段）。   - 管理策略：应直接转诊阴道镜检查，无需HPV分流（相似度0.278片段流程图）。这是因为ASC-H的恶性风险更高，需优先排除高级别病变。  总之，ASC-US管理依赖HPV分流以决定是否转诊阴道镜，而ASC-H因高风险直接转诊阴道镜。 | A | A | A |
| **Question 39: 对于阴道镜检查无异常的患者是否仍需要四象限取样？** | | | | |
| Chunk size=512, Overlap=0 Using TokenTextSplitter | 对于阴道镜检查无异常的患者是否仍需要四象限取样？  对于阴道镜检查无异常的患者，不建议常规进行四象限取样。文档明确指出：“鉴于我国阴道镜医师的水平不一，缺乏微小活检钳( $2 \sim 3 ~ \mathrm { m m } )$ ，对于阴道镜下未发现异常而行四象限取材要慎重，推荐阴道镜指示下有目标的多点活检。” 这强调了应避免盲目四象限取材，而应在阴道镜指导下进行有针对性（目标性）的多点活检，以减少不必要的损伤和过度诊疗。 | A | A | A |
| Chunk size=256, Overlap=100 Using SentenceSplitter | 对于阴道镜检查无异常的患者是否仍需要四象限取样？  文档中明确指出，对于阴道镜检查无异常的患者，不建议常规进行四象限取样（相似度0.384片段）。原因包括：  - 鉴于我国阴道镜医师水平不一，且缺乏微小活检钳（2～3 mm），四象限取材可能造成不必要的创伤和过度医疗。  - 推荐在阴道镜指示下有目标的多点活检（即针对可疑区域进行针对性取样），而非盲目四象限取材。  - 专家共识强调应加强阴道镜培训和质量控制，以避免漏诊或过度诊断。  因此，四象限取样仅在阴道镜发现异常时考虑，无异常时推荐有目标的多点活检。 | A | A | A |
| **Question 40: 妊娠期女性宫颈癌筛查和管理策略有什么不同？** | | | | |
| Chunk size=512, Overlap=0 Using TokenTextSplitter | 妊娠期女性宫颈癌筛查和管理策略有什么不同？  妊娠期女性的宫颈癌筛查和管理策略需特殊处理，以避免对胎儿的影响，文档中提供了具体指导： - 筛查策略：妊娠期女性应每10-12周进行细胞学检查和阴道镜检查。文档提到：“对于妊娠期患者，应每10-12周进行细胞学＋阴道镜检查。” - 管理策略：  - 若未发现浸润癌，则推迟至产后6-8周复查（包括细胞学、阴道镜和颈管搔刮术ECC）。复查后若无CIN II+病变，转为常规筛查；若出现CIN II+，则进行诊断性/治疗性宫颈切除术。  - 若妊娠期间细胞学或阴道镜检查发现可疑浸润癌，则立即进行诊断性/治疗性宫颈切除术。  - 文档还强调：“妊娠女性若无浸润癌证据，可每10～12 周复查细胞学或阴道镜观察，产后6～8 周复查。” 这突出了延迟侵入性处理至产后的原则，除非高度怀疑浸润癌。 此策略旨在平衡母体健康和胎儿安全，优先采用观察和非侵入性方法。 | A | A | A |
| Chunk size=256, Overlap=100 Using SentenceSplitter | 妊娠期女性宫颈癌筛查和管理策略有什么不同？  文档中提供了妊娠期女性的特殊管理策略（相似度0.307和0.291片段）：  - 筛查和管理原则：主要目标是排除浸润癌。妊娠期女性若无浸润癌证据，不建议激进处理（如活检或手术），以避免对胎儿风险（相似度0.291片段）。  - 具体策略：   - 密切监测：每10～12周复查一次，包括细胞学或阴道镜观察，以排除浸润癌（相似度0.307片段）。   - 产后复查：产后6～8周进行复查（相似度0.291片段）。   - 异常处理：如果复查出现异常（如细胞学结果≥ASC-US或HPV阳性），则按照标准异常处理流程进行管理（例如转诊阴道镜或活检）。  - 注意事项：妊娠期宫颈病变（无论低级别或高级别）的管理以保守观察为主，除非有明确浸润癌证据。  文档未提及妊娠期常规筛查的调整（如是否避免某些检测），但强调个体化处理需结合患者意愿和临床表现。 | B | A | B |
| **Question 41: 宫颈癌的首选临床诊断方法是什么？** | | | | |
| Chunk size=512, Overlap=0 Using TokenTextSplitter | 宫颈癌的首选临床诊断方法是什么？  根据上下文信息（在"2.1 宫颈癌诊断基本原则"部分，I级推荐），宫颈癌的首选临床诊断方法包括：  - 体格检查：包括全身检查，以评估整体健康状况。  - 妇科检查：包括双合诊与三合诊检查，推荐由2名及以上高年资医师进行；必要时在麻醉状态下检查；分期判断有分歧时，推荐较早分期。  这些方法是临床诊断的基础步骤，用于初步评估宫颈病变的范围和分期。病理诊断（如活检）是后续确认的关键，但临床诊断是首选初步方法。 | A | A | A |
| Chunk size=256, Overlap=100 Using SentenceSplitter | 宫颈癌的首选临床诊断方法是什么？  回答：  根据文档内容（相似度0.624），宫颈癌的首选临床诊断方法是体格检查和妇科检查。这些方法属于I级推荐（最高推荐等级）。具体包括：  - 体格检查：全面身体检查，评估整体健康状况。  - 妇科检查：包括双合诊与三合诊检查，推荐由2名及以上高年资医师进行；必要时在麻醉状态下检查。如果分期判断有分歧，推荐采用较早分期。  这些检查用于初步评估肿瘤位置、大小和扩散情况，是临床诊断的基础。文档中未提及其他临床诊断方法作为首选。 | A | A | A |
| **Question 42: 为了做出宫颈癌的病理诊断应该进行什么检查？** | | | | |
| Chunk size=512, Overlap=0 Using TokenTextSplitter | 为了做出宫颈癌的病理诊断应该进行什么检查？  根据上下文信息（在"2.1 宫颈癌诊断基本原则"部分，I级推荐），宫颈癌的病理诊断应进行以下检查：  - I级推荐（最高推荐等级）：   - 子宫颈活检：作为核心方法，用于直接获取组织样本进行病理学分析。   - 宫颈细胞学检查：用于筛查和初步诊断，但需注意子宫颈腺癌可能存在假阴性可能（注释b）。  - II级推荐：   - 宫颈锥切：当子宫颈活检无法判断有无浸润或微小浸润癌时，推荐用于明确浸润深度（注释c）。  - III级推荐：   - 穿刺细胞学：当腹股沟或颈部淋巴结可疑转移时，推荐用于明确诊断（注释d）。  这些检查是病理诊断的标准工具，需结合组织学分析（如大体和镜下检查）来确诊宫颈癌的类型和分级。 | A | A | A |
| Chunk size=256, Overlap=100 Using SentenceSplitter | 为了做出宫颈癌的病理诊断应该进行什么检查？  回答：  根据文档内容（相似度0.624），宫颈癌的病理诊断应基于以下检查，按推荐等级分类：  - I级推荐（最高推荐）：   - 子宫颈活检：作为首选方法，直接从宫颈可疑部位取样进行组织学检查，以确认癌变。  - II级推荐：   - 宫颈锥切：当活检无法明确浸润深度（如微小浸润癌）或细胞学与活检结果不符时使用（例如多次高级别鳞状上皮内病变但活检未支持）。  - III级推荐：   - 穿刺细胞学：用于可疑转移淋巴结（如腹股沟或颈部淋巴结）的评估。  病理诊断需通过显微镜检查组织样本，确认组织学分型、分级和浸润深度。文档强调，活检是I级推荐的核心方法，锥切用于补充诊断（相似度0.580和0.506）。 | B | A | B |
| **Question 43: 宫颈癌实验室诊断可以检测哪些肿瘤标志物？每个检测的肿瘤标志物的意义是什么？** | | | | |
| Chunk size=512, Overlap=0 Using TokenTextSplitter | 宫颈癌实验室诊断可以检测哪些肿瘤标志物？每个检测的肿瘤标志物的意义是什么？  根据上下文信息（在"2.1 宫颈癌诊断基本原则"部分，实验室诊断和注释e），宫颈癌实验室诊断可检测以下肿瘤标志物，每个标志物的意义如下：  - SCC（鳞状细胞癌抗原）：推荐用于子宫颈鳞癌的检测，有助于诊断和监测鳞癌的进展（注释e）。  - CA125：推荐用于子宫颈腺癌的检测，作为腺癌的辅助诊断指标（注释e）。  - CEA（癌胚抗原）和 CA19-9：推荐用于子宫颈胃型腺癌的检测，用于辅助诊断和评估该亚型（注释e）。  - NSE（神经元特异性烯醇化酶）：推荐用于子宫颈小细胞神经内分泌癌的检测，有助于诊断这种罕见亚型（注释e）。  这些肿瘤标志物主要用于辅助诊断特定宫颈癌亚型，而非独立确诊工具，需结合病理和影像学结果综合判断。 | A | A | A |
| Chunk size=256, Overlap=100 Using SentenceSplitter | 宫颈癌实验室诊断可以检测哪些肿瘤标志物？每个检测的肿瘤标志物的意义是什么？  回答：  根据文档内容（相似度0.624和0.506），宫颈癌实验室诊断可检测的肿瘤标志物及其意义如下：  - 检测的肿瘤标志物：SCC、CEA、CA125、CA19-9和NSE等。这些属于I级推荐。  - 每个标志物的意义（基于文档中的具体关联）：   - SCC（鳞状细胞癌抗原）：主要用于子宫颈鳞癌的检测和监测，作为辅助诊断指标（相似度0.506）。   - CA125：主要用于子宫颈腺癌的检测，帮助评估腺癌类型（相似度0.506）。   - CEA（癌胚抗原）和CA19-9：主要用于子宫颈胃型腺癌的检测，辅助诊断特定亚型（相似度0.506）。   - NSE（神经元特异性烯醇化酶）：主要用于子宫颈小细胞神经内分泌癌的检测，作为神经内分泌分化的标志（相似度0.506）。  这些标志物的检测意义在于辅助病理诊断、分型和监测，但文档强调它们仅具有辅助价值（生物学标志只具有辅助诊断意义，相似度0.580），不能单独用于确诊。HPV检测也是I级推荐，用于评估HPV感染状态（相似度0.624）。 | A | A | A |
| **Question 44: 在宫颈癌诊断中，为了评估宫颈肿瘤应该首选哪种影像学方法？为了评估转移病灶应该使用哪种影像学方法？** | | | | |
| Chunk size=512, Overlap=0 Using TokenTextSplitter | 在宫颈癌诊断中，为了评估宫颈肿瘤应该首选哪种影像学方法？为了评估转移病灶应该使用哪种影像学方法？  根据上下文信息（在"2.1 宫颈癌诊断基本原则"部分，影像诊断和注释f、g）：  - 评估宫颈肿瘤（局部肿瘤）：   - 首选方法：盆腔MRI。推荐作为评估子宫颈局部肿瘤的首选影像学方法，因为它能提供高分辨率的软组织对比，有助于评估肿瘤大小、浸润深度和宫旁侵犯（注释f）。   - 替代方法：如果MRI存在禁忌证（如体内有金属植入物），可选择盆腔CT（注释f）。  - 评估转移病灶：   - 首选方法：颈胸腹盆腔CT。用于全面评估转移病灶，包括淋巴结、肺、肝等远处器官（注释g）。   - 必要时补充：PET/CT。建议IB1期以上有条件者使用，以提高转移灶检测的准确性，尤其在评估淋巴结转移时（注释g）。  这些方法的选择基于肿瘤分期和临床需求，影像学结果用于补充临床和病理诊断。 | A | A | A |
| Chunk size=256, Overlap=100 Using SentenceSplitter | 在宫颈癌诊断中，为了评估宫颈肿瘤应该首选哪种影像学方法？为了评估转移病灶应该使用哪种影像学方法？  回答：  根据文档内容（相似度0.624和0.580），影像学方法按评估目标分类：  - 评估宫颈肿瘤（局部肿瘤）：   - 首选方法：盆腔MRI（I级推荐）。文档明确说明：“推荐盆腔MRI作为评估子宫颈局部肿瘤首选方法”（相似度0.580）。如果MRI存在禁忌证（如患者有金属植入物），可选择盆腔CT作为替代（II级推荐）。  - 评估转移病灶：   - 首选方法：颈胸腹盆腔CT（I级推荐）。必要时（如IB1期以上），建议行PET/CT检查（I级推荐）。文档指出：“转移病灶评估：颈胸腹盆腔CT，必要时PET/CT”（相似度0.624）。对于特定情况（如可疑骨转移），推荐骨扫描；可疑膀胱或直肠受累时，推荐膀胱镜或肠镜检查（III级推荐）。  这些方法用于全面评估肿瘤范围和转移风险，影像学结果可辅助分期和治疗决策。 | B | A | A |
| **Question 45: FIGO分期IA1期宫颈癌患者推荐的诊断工具有哪些？是否需要考虑淋巴血管浸润（LVSI）？** | | | | |
| Chunk size=512, Overlap=0 Using TokenTextSplitter | FIGO分期IA1期宫颈癌患者推荐的诊断工具有哪些？是否需要考虑淋巴血管浸润（LVSI）？  根据上下文信息（在"3 宫颈癌临床病理分期"和"4.1.1.1 IA1期"部分）：  - 推荐的诊断工具：   - 病理诊断工具：FIGO IA1期定义为"间质浸润深度小于3mm"的显微镜下浸润癌，诊断必须基于组织病理学检查。推荐工具包括：   - 宫颈锥切术：用于获取完整组织样本，明确浸润深度（在IA1期诊断中常用）。   - 子宫颈活检：作为初步工具，但需结合锥切或手术标本确认（因为IA期需显微镜下诊断，不能仅靠活检）。   - 影像学工具（如盆腔MRI）通常不用于IA1期诊断，除非有高危因素，但文档未明确指定IA1期的影像学推荐；因此，主要依赖病理工具。  - 是否需要考虑淋巴血管浸润（LVSI）：   - 是。虽然LVSI不改变FIGO分期（文档提到"淋巴脉管浸润虽不改变分期"），但它会影响治疗决策。例如，在IA1期，如果LVSI阳性，推荐行改良根治性子宫切除加盆腔淋巴结切除术；如果LVSI阴性，可行宫颈锥切术或筋膜外全子宫切除术（基于"4.1.1.1 IA1期"部分）。因此，LVSI状态是治疗计划的关键考量因素。 | A | A | A |
| Chunk size=256, Overlap=100 Using SentenceSplitter | 在FIGO分期中如何使用影像学工具评估肿瘤大小和淋巴结状况？推荐哪些具体的影像学工具？  根据文档内容：  - 影像学工具用于评估肿瘤大小、淋巴结状态以及局部或全身转移情况，以辅助FIGO分期。具体使用方式包括：   - 肿瘤大小评估：MRI（磁共振成像）被推荐为评估原发性肿瘤（尤其是肿瘤直径 >10 mm）的最佳影像学方法，因为它能提供更准确的肿瘤大小和浸润深度信息。   - 淋巴结状况评估：PET-CT（正电子发射计算机断层显像）被推荐用于检测淋巴结转移（特别是淋巴结直径 >10 mm），因为它比CT或MRI更准确（假阴性率约为4%~15%）。其他工具如超声、CT和MRI也可用于淋巴结评估，但需注意在结核或炎症高发区（如HIV流行区），淋巴结肿大可能并非恶性，需结合病理活检确认。  - 推荐的影像学工具包括：超声、CT（计算机断层扫描）、MRI、PET/CT。文档强调，任何可用的影像学方法均可用于分期，但MRI在评估宫旁浸润方面优于CT。影像学结果需记录具体方法（如使用的技术类型），以补充临床检查，并用于避免不必要的双重治疗（如手术和放疗）。  - 注意：影像学评估宫旁及阴道上段的准确度欠佳，可能因感染或巨块型肿瘤导致假阴性或假阳性，因此临床检查（如妇科双合诊）仍被视为更重要的评估手段。 | B | B | B |
| **Question 46: 在FIGO分期中如何使用影像学工具评估肿瘤大小和淋巴结状况？推荐哪些具体的影像学工具？** | | | | |
| Chunk size=512, Overlap=0 Using TokenTextSplitter | 在FIGO分期中如何使用影像学工具评估肿瘤大小和淋巴结状况？推荐哪些具体的影像学工具？  根据文档内容，影像学工具在FIGO分期中用于评估肿瘤大小和淋巴结状况，以辅助确定疾病累及范围、指导治疗决策（如避免手术和放疗双重治疗），并标记分期（例如，淋巴结转移时使用"r"表示影像学发现）。具体使用方法和推荐工具如下：  - 评估肿瘤大小：  - MRI是评估原发肿瘤大小的首选影像学方法，尤其对于肿瘤直径>10mm的情况，因为它能准确测量肿瘤最大径线（文档提到："对于 >10mm 的原发肿瘤MRI 是最佳影像学评估方法"）。  - 超声也可用于评估，但需由经验丰富的专家操作以确保准确性（文档提到："若由经验丰富的专家操作，超声诊断也具有良好的准确性"）。  - 影像学评估的目的是补充临床检查，帮助确定肿瘤大小（例如，用于细分IB期），并记录具体方法以备后续分析（文档提到："应记录具体采用何种影像学方式以备后续评估"）。  - 评估淋巴结状况：  - PET-CT是检测淋巴结转移（尤其是>10mm的淋巴结）最准确的工具，假阴性率约4%~15%，优于CT和MRI（文档提到："检测 >10mm 的淋巴结PET-CT 比 CT 和 MRI 更准确，假阴性率约4%～15%"）。  - 在结核和炎症高发区（如HIV流行区），大的淋巴结未必提示转移，因此需结合影像学检查、细针穿刺抽吸或活检来确认或排除转移（文档提到："医生可以根据影像检查或细针穿刺抽吸或活检来确定或排除转移"）。  - 影像学发现淋巴结转移时，用于分期标记（如ⅢC1r），并需记录技术类型（文档提到："影像学发现盆腔淋巴结转移，则分期为ⅢC1r"和"需记录影像和病理技术的类型"）。  - 推荐的影像学工具：  - MRI：首选用于评估肿瘤大小和宫旁浸润（优于CT），尤其适用于>10mm的肿瘤（文档多次强调："MRI评估宫旁浸润优于CT"）。  - PET-CT：推荐用于淋巴结评估，因其高准确性。  - CT：可用于一般评估，但准确性低于MRI和PET-CT。  - 超声：在经验丰富的操作者下使用，适用于资源有限地区。  - 其他工具如静脉肾盂造影或泌尿系超声可用于评估肾积水（文档提到："检查并通过泌尿系超声、静脉肾盂造影、CT或MRI 评估是否有肾积水"）。  总之，影像学工具用于补充临床检查，但病理学仍是金标准。所有影像学方法（包括超声、CT、MRI、PET-CT等）均可用于分期，需记录具体方法以确保数据可分析（文档强调："规定所有影像学检查手段均可用于分期"）。 | A | A | A |
| Chunk size=256, Overlap=100 Using SentenceSplitter | 在FIGO分期中如何使用影像学工具评估肿瘤大小和淋巴结状况？推荐哪些具体的影像学工具？  根据文档内容：  - 影像学工具用于评估肿瘤大小、淋巴结状态以及局部或全身转移情况，以辅助FIGO分期。具体使用方式包括：   - 肿瘤大小评估：MRI（磁共振成像）被推荐为评估原发性肿瘤（尤其是肿瘤直径 >10 mm）的最佳影像学方法，因为它能提供更准确的肿瘤大小和浸润深度信息。   - 淋巴结状况评估：PET-CT（正电子发射计算机断层显像）被推荐用于检测淋巴结转移（特别是淋巴结直径 >10 mm），因为它比CT或MRI更准确（假阴性率约为4%~15%）。其他工具如超声、CT和MRI也可用于淋巴结评估，但需注意在结核或炎症高发区（如HIV流行区），淋巴结肿大可能并非恶性，需结合病理活检确认。  - 推荐的影像学工具包括：超声、CT（计算机断层扫描）、MRI、PET/CT。文档强调，任何可用的影像学方法均可用于分期，但MRI在评估宫旁浸润方面优于CT。影像学结果需记录具体方法（如使用的技术类型），以补充临床检查，并用于避免不必要的双重治疗（如手术和放疗）。  - 注意：影像学评估宫旁及阴道上段的准确度欠佳，可能因感染或巨块型肿瘤导致假阴性或假阳性，因此临床检查（如妇科双合诊）仍被视为更重要的评估手段。 | A | A | A |
| **Question 47: FIGO 2018分期将IB期细分为了IB1、IB2和IB3期。请问这三个分期的具体诊断标准是什么？** | | | | |
| Chunk size=512, Overlap=0 Using TokenTextSplitter | FIGO 2018分期将IB期细分为了IB1、IB2和IB3期。请问这三个分期的具体诊断标准是什么？  根据文档内容，FIGO 2018分期对IB期进行了细分，诊断标准基于肿瘤最大径线（从上皮或基底膜测量），具体如下：  - IB1期：肿瘤最大径线 ≤ 2 cm，且间质浸润深度 ≥ 5 mm（从基底膜或腺体算起）。文档明确提到："IB1期：间质浸润深度≥5mm，病灶最大径线小于2cm" 和 "T1b1（FIGO IB1期）：间质浸润深度>5mm，最大径≤2cm"。 - IB2期：肿瘤最大径线 > 2 cm 但 ≤ 4 cm，且间质浸润深度 ≥ 5 mm。文档提到："IB2期：癌灶最大径线≥2cm但小于4cm" 和 "T1b2（FIGO IB2期）：最大径>2cm，≤4cm"。  - IB3期：肿瘤最大径线 ≥ 4 cm，且间质浸润深度 ≥ 5 mm。文档提到："IB3期：癌灶最大径线≥4cm" 和 "T1b3（FIGO IB3期）：最大径>4cm"。  这些细分基于肿瘤大小，不再考虑水平浸润宽度（文档解释："新分期明确了影像学和病理学结果都可以用于分期"，且"浸润深度从原发灶起源的上皮或腺体基底膜向下测量"）。分期越低预后越好，但IB3期预后较差。 | A | A | A |
| Chunk size=256, Overlap=100 Using SentenceSplitter | FIGO 2018分期将IB期细分为了IB1、IB2和IB3期。请问这三个分期的具体诊断标准是什么？  根据文档内容（主要来自表1 FIGO 2018宫颈癌分期描述）：  - IB期定义为浸润癌浸润深度 >5 mm（超过IA期），但癌灶仍局限于子宫颈（是否扩散至宫体不予考虑）。具体细分标准基于肿瘤最大径线：   - IB1期：肿瘤最大径线 <2 cm（即浸润深度 >5 mm，但病灶尺寸 ≤2 cm）。   - IB2期：肿瘤最大径线 ≥2 cm 但 <4 cm。   - IB3期：肿瘤最大径线 ≥4 cm。  - 文档明确说明，这一细分是基于病灶的最大径线（而非浸润深度），旨在更精确地指导治疗决策（如IB3期不推荐保留生育功能）。 | A | A | A |
| **Question 48: 根据FIGO 2018分期，IA1期和IA2期的主要区别是什么？** | | | | |
| Chunk size=512, Overlap=0 Using TokenTextSplitter | 根据FIGO 2018分期，IA1期和IA2期的主要区别是什么？  根据文档内容，FIGO 2018分期中，IA1期和IA2期的主要区别在于间质浸润深度的不同，具体如下：  - IA1期：间质浸润深度 ≤ 3 mm（从上皮或腺体的基底膜开始测量）。文档明确提到："IA1期：间质浸润深度≤3mm" 和 "T1a1（FIGO IA1期）：间质浸润深度≤3mm"。  - IA2期：间质浸润深度 > 3 mm 但 ≤ 5 mm（从上皮或腺体的基底膜开始测量）。文档提到："IA2期：间质浸润深度>3mm，但≤5mm" 和 "T1a2（FIGO IA2期）：间质浸润深度>3mm，≤5mm"。  关键点： - 两者均为显微镜下诊断的微小浸润癌（仅通过病理检查确认）。 - 水平浸润宽度不再作为分期标准（文档解释："修订版不再考虑水平浸润宽度，因会受许多人为因素影响"）。 - 淋巴脉管间隙浸润（LVSI）不改变分期，但会影响治疗决策（例如，IA1期伴LVSI阳性需按IA2期处理）。 | A | A | A |
| Chunk size=256, Overlap=100 Using SentenceSplitter | 根据FIGO 2018分期，IA1期和IA2期的主要区别是什么？  根据文档内容（主要来自表1 FIGO 2018宫颈癌分期描述）：  - IA1期和IA2期均属于显微镜下可见的浸润癌（最大浸润深度 <5 mm），主要区别在于间质浸润深度：   - IA1期：间质浸润深度 ≤3 mm。   - IA2期：间质浸润深度 >3 mm 但 ≤5 mm。  - 文档强调，修订版不再考虑水平浸润宽度（因受人为因素影响），且淋巴脉管间隙浸润（LVSI）不改变分期，但会影响治疗决策（如LVSI阳性需按更高风险处理）。 | C | C | C |
| **Question 49: 根据FIGO 2018分期，当影像学或病理学发现淋巴结转移时，应如何具体标记分期？在报告时，对于淋巴结转移的发现方式有何标记要求？** | | | | |
| Chunk size=512, Overlap=0 Using TokenTextSplitter | 根据FIGO 2018分期，当影像学或病理学发现淋巴结转移时，应如何具体标记分期？在报告时，对于淋巴结转移的发现方式有何标记要求？  根据文档内容，当影像学或病理学发现淋巴结转移时，FIGO 2018分期要求具体标记分期和发现方式，以确保数据准确性和后续分析。具体如下：  - 分期标记：  - 如果淋巴结转移是通过影像学发现的，分期标记为"r"（例如，盆腔淋巴结转移标记为ⅢC1r，腹主动脉旁淋巴结转移标记为ⅢC2r）。文档明确提到："影像学发现盆腔淋巴结转移，则分期为ⅢC1r" 和 "影像学评估宫旁及阴道上段的准确度均欠佳...影像学发现盆腔淋巴结转移，则分期为ⅢC1r"。  - 如果淋巴结转移是通过病理学证实的（如活检或手术），分期标记为"p"（例如，病理学发现盆腔淋巴结转移标记为ⅢC1p，腹主动脉旁淋巴结转移标记为ⅢC2p）。文档提到："假如是病理学发现的，则分期为ⅢC1p" 和 "需注明ⅢC 期的影像和病理发现，例如：...病理学发现的，则分期为ⅢC1p"。  - 报告要求：  - 必须记录所采用的影像学或病理学技术类型（例如，MRI、CT、PET-CT、细针穿刺、手术活检等）。文档强调："需记录影像和病理技术的类型" 和 "需记录所采用的影像学方法及病理学技术类型"。  - 对于病理学方法，需标注具体技术（如N(f)表示细针抽吸确诊，N(sn)表示前哨淋巴结活检确诊）。文档提到："对确诊所用的病理学技术方法进行标注，如N(f)是指淋巴结转移通过细针抽吸或粗针穿刺确诊"。  - 在分期报告中，需明确标注"r"或"p"以区分发现方式，便于数据分析和预后评估（文档提到："需记录这一分期是基于影像学检查（r）还是有病理学证实（p）。以便对数据进行相应的分析和报告"）。  总之，这种标记系统有助于避免误诊（尤其在结核或炎症高发区），并确保分期一致性。 | B | A | A |
| Chunk size=256, Overlap=100 Using SentenceSplitter | 根据FIGO 2018分期，当影像学或病理学发现淋巴结转移时，应如何具体标记分期？在报告时，对于淋巴结转移的发现方式有何标记要求？  根据文档内容：  - 当发现淋巴结转移时，分期标记需注明证据来源（影像学或病理学），具体方式为：   - 如果淋巴结转移通过影像学方法（如MRI、CT或PET）发现，分期标记添加后缀 "r"（例如，盆腔淋巴结转移标记为 IIIC1r）。   - 如果淋巴结转移通过病理学方法（如细针抽吸、粗针穿刺或手术活检）证实，分期标记添加后缀 "p"（例如，病理证实的盆腔淋巴结转移标记为 IIIC1p）。  - 报告时的标记要求：   - 必须记录所使用的具体影像学方法（如超声、CT、MRI或PET）或病理学技术类型（如细针抽吸标注为N(f)，前哨淋巴结活检标注为N(sn)）。   - 例如，影像学显示盆腔淋巴结转移时，报告为IIIC1r，并注明所用影像工具；病理学证实腹主动脉旁淋巴结转移时，报告为IIIC2p，并注明病理技术。  - 文档强调，若分期存在争议，应归于更早的期别，且ITC（孤立肿瘤细胞，直径 <0.2 mm）不影响分期，但需记录其存在。 | B | B | B |
| **Question 50: 当病理检查意外发现宫颈癌时，由于初次手术范围不足，患者需要进一步行哪些诊断和治疗？** | | | | |
| Chunk size=512, Overlap=0 Using TokenTextSplitter | 当病理检查意外发现宫颈癌时，由于初次手术范围不足，患者需要进一步行哪些诊断和治疗？ -进一步诊断：  - 必须进行全面的分期评估，包括：  - 影像学检查：如盆腔MRI评估肿瘤大小和局部侵犯，PET-CT或CT评估淋巴结和远处转移。  - 病理学复核**：重新审查初次手术标本，确认浸润深度、切缘状态和淋巴结状况。 -进一步治疗：  - 知识库中无法找到进一步治疗方法。 | C | C | C |
| Chunk size=256, Overlap=100 Using SentenceSplitter | 当病理检查意外发现宫颈癌时，由于初次手术范围不足，患者需要进一步行哪些诊断和治疗？  在知识库中未找到答案。  - 文档提到“全子宫切除术后意外发现的宫颈浸润癌，不进行临床分期或纳入治疗统计数据中，必须进行单独报告”，但未提供关于后续诊断或治疗的具体步骤（如是否需要补充影像学检查、淋巴结评估或辅助治疗）。因此，基于提供的上下文，无法确定进一步的诊断和治疗方案。建议参考最新临床指南或咨询多学科团队以获取个体化建议。 | D | D | D |
| **Question 51: 在宫颈癌治疗中，如果患者不希望保留生育能力，分期为IA1期且无淋巴血管间隙浸润，应该采取什么治疗措施？** | | | | |
| Chunk size=512, Overlap=0 Using TokenTextSplitter | 在宫颈癌治疗中，如果患者不希望保留生育能力，分期为IA1期且无淋巴血管间隙浸润，应该采取什么治疗措施？ - 回答: 根据文档内容（例如，相似度0.510片段和相似度0.418片段中的表4 FIGO和NCCN指南推荐），对于IA1期无淋巴血管间隙浸润（LVSI阴性）且无保留生育要求的患者，I级推荐是筋膜外全子宫切除术（也称为A型子宫切除术）。这是一种保守的手术方式，仅切除子宫和宫颈，不涉及广泛宫旁组织或淋巴结清扫，适用于低风险病例。文档中未提及放疗作为首选，因此手术是主要治疗措施。   依据: "IA1期 LVSI阴性 FIGO 2018不保留生育功能：筋膜外全子宫切除术"（相似度0.418片段）。 | A | A | A |
| Chunk size=256, Overlap=100 Using SentenceSplitter | 在宫颈癌治疗中，如果患者不希望保留生育能力，分期为IA1期且无淋巴血管间隙浸润，应该采取什么治疗措施？  回答：根据文档内容，对于IA1期无淋巴血管间隙浸润（LVSI阴性）且不保留生育功能的患者，推荐的治疗措施是筋膜外全子宫切除术。放疗可作为备选方案，尤其适用于有手术禁忌证的患者。  - 依据：在[相似度: 0.488]片段中提到：“IA1期 LVSI阴性 FIGO 2018不保留生育功能： 筋膜外全子宫切除术 放疗”。同时，[相似度: 0.400]片段指出：“IA期：无手术禁忌者应选择手术治疗，有手术禁忌者行放射治疗。”这支持筋膜外全子宫切除术作为首选。 | B | A | A |
| **Question 52: 在宫颈癌治疗中，如果患者不希望保留生育能力，分期为IA1期且有淋巴血管间隙浸润，应该采取什么治疗措施？** | | | | |
| Chunk size=512, Overlap=0 Using TokenTextSplitter | 在宫颈癌治疗中，如果患者不希望保留生育能力，分期为IA1期且有淋巴血管间隙浸润，应该采取什么治疗措施？ - 回答: 根据文档内容（例如，相似度0.510片段和相似度0.418片段中的表4 FIGO和NCCN指南推荐），对于IA1期有淋巴血管间隙浸润（LVSI阳性）且无保留生育要求的患者，I级推荐是改良根治性子宫切除术（B型子宫切除术）加盆腔淋巴结切除术。这涉及切除子宫、部分宫旁组织和盆腔淋巴结，以降低复发风险。放疗可作为备选方案（II级推荐），但手术是首选。   依据: "IA1期伴淋巴脉管间隙浸润 I级推荐：B型子宫切除 + 根治性放疗（体外放疗 + 阴道近距离放疗）+ 盆腔淋巴结切除术"（相似度0.558片段），以及 "IA1期 LVSI阳性 FIGO 2018不保留生育功能：1.改良根治子宫切除术+盆腔淋巴结切除术"（相似度0.418片段）。 | A | A | A |
| Chunk size=256, Overlap=100 Using SentenceSplitter | 在宫颈癌治疗中，如果患者不希望保留生育能力，分期为IA1期且有淋巴血管间隙浸润，应该采取什么治疗措施？  回答：根据文档内容，对于IA1期有淋巴血管间隙浸润（LVSI阳性）且不保留生育功能的患者，推荐的治疗措施是改良根治性子宫切除术加盆腔淋巴结切除术。放疗也可作为备选方案。  - 依据：在[相似度: 0.600]片段中提到：“IA1期伴淋巴脉管间隙浸润 I级推荐： B型子宫切除c + 根治性放疗（体外放疗 + 阴道近距离放疗）+ 盆腔淋巴结切除术”。同时，[相似度: 0.488]片段明确：“IA1期 LVSI阳性 FIGO 2018不保留生育功能：1.改良根治子宫切除术+盆腔淋巴结切除术 2.放疗”。这里“B型子宫切除”对应改良根治性子宫切除术。 | A | A | A |
| **Question 53: 在宫颈癌治疗中，如果患者不希望保留生育能力，分期为IA2期，应该采取什么治疗措施？** | | | | |
| Chunk size=512, Overlap=0 Using TokenTextSplitter | 宫颈癌治疗中，如果患者不希望保留生育能力，分期为IA2期，应该采取什么治疗措施？ - 回答: 根据文档内容（例如，相似度0.558片段和相似度0.418片段中的表4 FIGO和NCCN指南推荐），对于IA2期无保留生育要求的患者，I级推荐是B型子宫切除术（改良根治性子宫切除术）加盆腔淋巴结切除术。这包括切除子宫、部分宫旁组织和清扫盆腔淋巴结，以处理潜在的淋巴结转移风险。对于低风险病例，单纯全子宫切除术加盆腔淋巴结切除或前哨淋巴结切除可作为II级推荐，但B型手术是主要选择。文档未推荐放疗作为首选。   依据: "IA2期 I级推荐：B型子宫切除 + 根治性放疗（体外放疗 + 阴道近距离放疗） + 盆腔淋巴结切除术"（相似度0.558片段），以及 "IA2期 FIGO 2018不保留生育功能：B型子宫切除+盆腔淋巴结切除"（相似度0.418片段）。 | A | B | A |
| Chunk size=256, Overlap=100 Using SentenceSplitter | 在宫颈癌治疗中，如果患者不希望保留生育能力，分期为IA2期，应该采取什么治疗措施？  回答：根据文档内容，对于IA2期且不保留生育功能的患者，推荐的治疗措施是B型子宫切除术（改良根治性子宫切除术）加盆腔淋巴结切除术。  - 依据：在[相似度: 0.600]片段中提到：“IA2期 I级推荐： B型子宫切除c,h + 根治性放疗（体外放疗 + 阴道近距离放疗） 盆腔淋巴结切除术[22]”。同时，[相似度: 0.488]片段指出：“IA2期 FIGO 2018不保留生育功能： B型子宫切除c,h + 盆腔淋巴结切除术”。文档中“B型子宫切除”指改良根治性子宫切除术。 | A | A | A |
| **Question 54: 在宫颈癌治疗中，如果患者不希望保留生育能力，分期为IB1期、IIA1期或IB2期，应该采取什么治疗措施？** | | | | |
| Chunk size=512, Overlap=0 Using TokenTextSplitter | 在宫颈癌治疗中，如果患者不希望保留生育能力，分期为IB1期、IIA1期或IB2期，应该采取什么治疗措施？ - 回答: 根据文档内容（例如，相似度0.558片段和相似度0.494片段中的表4 FIGO和NCCN指南推荐），对于IB1期、IIA1期或IB2期无保留生育要求的患者，I级推荐是C型根治性子宫切除术加盆腔淋巴结切除术。这涉及广泛切除子宫、宫旁组织、阴道上段和盆腔淋巴结。文档还提到可辅以根治性放疗（体外放疗 + 阴道近距离放疗）± 铂类为基础的同步化疗，尤其对于高危因素（如肿瘤较大或LVSI阳性），但手术是核心治疗。II级推荐包括腹主动脉旁淋巴结切除术。   依据: "IB1期、IB2期、IIA1期 I级推荐：C型子宫切除 + 盆腔淋巴结切除术 + 根治性放疗（体外放疗 + 阴道近距离放疗）± 铂类为基础的同步化疗"（相似度0.558片段），以及 "IB1期 FIGO 2018不保留生育功能：C型根治性子宫切除术+盆腔淋巴结切除术"（相似度0.494片段）。 | A | B | A |
| Chunk size=256, Overlap=100 Using SentenceSplitter | 在宫颈癌治疗中，如果患者不希望保留生育能力，分期为IB1期、IIA1期或IB2期，应该采取什么治疗措施？  回答：根据文档内容，对于IB1期、IIA1期或IB2期且不保留生育功能的患者，推荐的治疗措施是C型根治性子宫切除术加盆腔淋巴结切除术。  - 依据：在[相似度: 0.600]片段中提到：“IB1期、IB2期、IIA1期 I级推荐： C型子宫切除c,h + 盆腔淋巴结切除术 + 根治性放疗（体外放疗 + 阴道近距离放疗）± 铂类为基础的同步化疗[21] + 盆腔淋巴结切除术（1类）d,e”。同时，[相似度: 0.442]片段明确：“IB1期、IIA1期 FIGO 2018不保留生育功能： C型根治性子宫切除术+盆腔淋巴结切除术”。IB2期也被包括在类似推荐中（如[相似度: 0.442]片段提到IB2期处理方式相同）。 | B | B | B |
| **Question 55: 在宫颈癌治疗中，如果患者不希望保留生育能力，分期为IB3期或IIA2期，应该采取什么治疗措施？** | | | | |
| Chunk size=512, Overlap=0 Using TokenTextSplitter | 在宫颈癌治疗中，如果患者不希望保留生育能力，分期为IB3期或IIA2期，应该采取什么治疗措施？  根据文档内容，对于IB3期或IIA2期且不保留生育功能的患者，I级推荐的治疗措施是根治性放疗（体外放疗 + 阴道近距离放疗）± 铂类为基础的同步化疗。文档中明确指出：“IB3期、IIA2期g I级推荐：根治性放疗（体外放疗 + 阴道近距离放疗）± 铂类为基础的同步化疗”（来自相似度0.558的片段）。另外，“IB3期、IIA2期 FIGO 2018不保留生育功能：同期放化疗”（来自相似度0.494的片段）也支持这一推荐，其中“同期放化疗”等同于同步放化疗。 | C | B | B |
| Chunk size=256, Overlap=100 Using SentenceSplitter | 在宫颈癌治疗中，如果患者不希望保留生育能力，分期为IB3期或IIA2期，应该采取什么治疗措施？  回答：根据文档内容，对于IB3期或IIA2期且不保留生育功能的患者，推荐的治疗措施是同步放化疗（即同期放化疗）。  - 依据：在[相似度: 0.606]片段中提到：“对于局部晚期宫颈癌（IB3期和ⅡA2期）首选同步放化疗”。同时，[相似度: 0.442]片段明确：“IB3期、IIA2期 FIGO 2018不保留生育功能： 同期放化疗”。文档中“同步放化疗”或“同期放化疗”指放疗联合铂类为基础的化疗。 | B | B | B |
| **Question 56: 在宫颈癌治疗中，如果患者希望保留生育能力，分期为IA1期且无淋巴血管间隙浸润，应该采取什么治疗措施？** | | | | |
| Chunk size=512, Overlap=0 Using TokenTextSplitter | 在宫颈癌治疗中，如果患者希望保留生育能力，分期为IA1期且无淋巴血管间隙浸润，应该采取什么治疗措施？  根据文档内容，对于FIGO IA1期宫颈癌且无淋巴血管间隙浸润（LVSI阴性）的患者，如果希望保留生育功能，推荐的治疗措施是宫颈锥切术。术后需确保切缘阴性，并进行定期随访。例如：  - 在[相似度: 0.539]片段中提到：“ⅠA1期 需保留生育功能者，LVSI（-）可行宫颈锥切术，切缘阴性者随访。”  - 在[相似度: 0.464]片段中进一步确认：“IA1期 LVSI阴性 FIGO 2018保留生育功能：锥切术。”  此方法适用于肿瘤浸润深度≤3mm、无脉管浸润的情况，目的是在保留子宫的同时清除病灶。 | A | A | A |
| Chunk size=256, Overlap=100 Using SentenceSplitter | 在宫颈癌治疗中，如果患者希望保留生育能力，分期为IA1期且无淋巴血管间隙浸润，应该采取什么治疗措施？  答案：推荐进行宫颈锥切术（锥切术），要求切缘阴性（至少3mm阴性切缘）。若切缘阳性，需再次锥切或行宫颈切除术。 - 依据：文档中多次提到（如相似度0.604、0.494等片段），IA1期无淋巴血管间隙浸润（LVSI阴性）时，保留生育功能的I级推荐是锥切术。NCCN指南也支持此方案。 | B | A | A |
| **Question 57: 在宫颈癌治疗中，如果患者希望保留生育能力，分期为IA1期伴淋巴血管间隙浸润或IA2期，应该采取什么治疗措施？** | | | | |
| Chunk size=512, Overlap=0 Using TokenTextSplitter | 在宫颈癌治疗中，如果患者希望保留生育能力，分期为IA1期伴淋巴血管间隙浸润或IA2期，应该采取什么治疗措施？  对于FIGO IA1期伴淋巴血管间隙浸润（LVSI阳性）或IA2期的患者，如果希望保留生育功能，推荐的治疗措施是根治性宫颈切除术加盆腔淋巴结切除术。例如：  - 在[相似度: 0.539]片段中提到：“ⅠA2期...保留生育功能者可选择：（1）宫颈切除术 + 腹腔镜下（或腹膜外）盆腔淋巴结切除术。（2）经腹、经阴道或腹腔镜下根治性宫颈切除术加盆腔淋巴结切除术。”  - 在[相似度: 0.464]片段中针对IA1期LVSI阳性指出：“NCCN 2019保留生育功能：锥切+盆腔淋巴结切除+根治性宫颈切除术+盆腔淋巴结切除。”  此方案适用于浸润深度>3mm但≤5mm（IA2期）或IA1期伴LVSI阳性的情况，需结合淋巴结评估以降低复发风险。 | B | B | B |
| Chunk size=256, Overlap=100 Using SentenceSplitter | 在宫颈癌治疗中，如果患者希望保留生育能力，分期为IA1期伴淋巴血管间隙浸润或IA2期，应该采取什么治疗措施？  答案：推荐行根治性宫颈切除术联合盆腔淋巴结切除术。手术可经腹、经阴道或腹腔镜进行，需确保淋巴结病理阴性。 - 依据：文档明确说明（相似度0.604、0.509等片段），IA1期伴LVSI阳性或IA2期需切除盆腔淋巴结，保留生育功能者选择根治性宫颈切除术+盆腔淋巴结切除（如"保留生育功能者可选择根治性宫颈切除术+盆腔淋巴结切除术"）。 | B | C | B |
| **Question 58: 在宫颈癌治疗中，如果患者希望保留生育能力，分期为IB1期，应该采取什么治疗措施？** | | | | |
| Chunk size=512, Overlap=0 Using TokenTextSplitter | 在宫颈癌治疗中，如果患者希望保留生育能力，分期为IB1期，应该采取什么治疗措施？  对于IB1期且希望保留生育能力的患者，推荐的治疗措施是根治性宫颈切除术加盆腔淋巴结切除术。文档中明确指出：   - "IB1期 FIGO 2018保留生育功能：根治性宫颈切除+盆腔淋巴结切除术"。  - "保留生育功能者可选择：根治性宫颈切除术 + 盆腔淋巴结切除术"。   此治疗适用于肿瘤直径≤2cm的患者，旨在完全切除病灶，同时保留子宫功能。手术方式可选择开腹、腹腔镜或机器人辅助。 | A | A | A |
| Chunk size=256, Overlap=100 Using SentenceSplitter | 在宫颈癌治疗中，如果患者希望保留生育能力，分期为IB1期，应该采取什么治疗措施？  答案**：推荐行根治性宫颈切除术（可经阴道、经腹或腹腔镜手术）联合盆腔淋巴结切除术。肿瘤需为外生型且直径≤4cm（通常建议≤2cm更理想），并排除内生型/颈管型。 - **依据**：文档指出（相似度0.607、0.494等片段），IB1期保留生育功能的手术方式为"经阴道"根治性宫颈切除，需切除宫颈及宫旁组织，并强调个体化评估肿瘤生长方式。 | B | B | B |
| **Question 59: 在宫颈癌治疗中，如果患者希望保留生育能力，分期为IB2期，应该采取什么治疗措施？** | | | | |
| Chunk size=512, Overlap=0 Using TokenTextSplitter | 在宫颈癌治疗中，如果患者希望保留生育能力，分期为IB2期，应该采取什么治疗措施？  推荐治疗措施：一般不推荐保留生育能力；标准治疗为根治性子宫切除术（radical hysterectomy）或同步放化疗（concurrent chemoradiotherapy）。 - 上下文信息强调，IB2期（肿瘤直径>2cm且≤4cm）因复发风险高，保留生育能力的可行性低。文献中未推荐根治性宫颈切除术等保守方案，优先考虑根治性手术或放化疗以控制疾病。 | D | D | D |
| Chunk size=256, Overlap=100 Using SentenceSplitter | 在宫颈癌治疗中，如果患者希望保留生育能力，分期为IB2期，应该采取什么治疗措施？  答案：可考虑经腹或腹腔镜根治性宫颈切除术联合盆腔淋巴结切除术，但需严格评估（肿瘤直径≤4cm、外生型、无子宫下段受累）。新分期中IB2期（肿瘤2-4cm）保留生育功能可行性有限，需谨慎选择。 - 依据：文档提到（相似度0.607、0.486等片段），IB2期手术可"经腹或腹腔镜"，但强调内生型或颈管型肿瘤不适合保留子宫体，且IB3期（>4cm）不推荐保留生育功能。 | A | A | A |
| **Question 60: 在宫颈癌治疗中，如果分期为IIB期、IIIA期或IIIB期，应该采取什么治疗措施？** | | | | |
| Chunk size=512, Overlap=0 Using TokenTextSplitter | 在宫颈癌治疗中，如果分期为IIB期、IIIA期或IIIB期，应该采取什么治疗措施？  对于FIGO IIB期、IIIA期或IIIB期宫颈癌（局部晚期），无论是否保留生育功能，首选的治疗措施是同步放化疗（体外放疗 + 阴道近距离放疗 ± 铂类为基础的同步化疗）。例如：  - 在[相似度: 0.569]片段中提到：“对于IB期～IVA期宫颈癌，治疗方式首选同步放化疗。”  - 在[相似度: 0.539]片段中明确：“IIB期 FIGO 2018不保留生育功能：同期放化疗”和“III期 FIGO 2018不保留生育功能：同期放化疗”（III期包括IIIA和IIIB）。  - 在[相似度: 0.526]片段中补充：“IIB期：原则上行放射治疗... III期：均应采用放射治疗，或采用化疗和放疗综合治疗。”  此方案适用于肿瘤超出宫颈但未达远处转移的情况，强调放疗与化疗的综合治疗以提高疗效。 | A | A | A |
| Chunk size=256, Overlap=100 Using SentenceSplitter | 在宫颈癌治疗中，如果分期为IIB期、IIIA期或IIIB期，应该采取什么治疗措施？  答案：首选同步放化疗（盆腔体外放疗+近距离放疗+含铂类同步化疗）。手术不作为常规推荐，仅在放疗资源匮乏或特殊情况下考虑。 - 依据：文档明确说明（相似度0.607、0.478等片段），IIB期及以上分期以放化疗为主，I级推荐为"盆腔EBRT+近距离放疗+同步含铂化疗"。未提及保留生育功能的方案，因晚期患者不适合保留生育。 | A | A | A |
| **Question 61: 在宫颈癌治疗中，如果分期为IIIC1期，应该采取什么治疗措施？** | | | | |
| Chunk size=512, Overlap=0 Using TokenTextSplitter | 在宫颈癌治疗中，如果分期为IIIC1期，应该采取什么治疗措施？ 回答:  根据文档内容，IIIC1期宫颈癌指累及盆腔淋巴结（需注明是基于影像学[r]或病理学[p]证据）。治疗首选同步放化疗（即体外放疗联合阴道近距离放疗，辅以铂类为基础的同步化疗）。  - 依据:   - [相似度: 0.459] 片段提到："FIGO分期中则分别为ⅢC1和ⅢC2...对于局部晚期宫颈癌的治疗，指南推荐首选同期放化疗。"   - [相似度: 0.553] 片段指出："对于IB期～IVA期宫颈癌，治疗方式首选同步放化疗。"（IIIC期属于局部晚期范畴）。   - [相似度: 0.486] 片段补充："对于这部分患者（包括淋巴结转移者）...术后辅助盆腔外照射可降低局部复发"，但IIIC1期通常不首选手术，而是直接放化疗。   因此，标准治疗是同步放化疗。 | A | A | A |
| Chunk size=256, Overlap=100 Using SentenceSplitter | 在宫颈癌治疗中，如果分期为IIIC1期，应该采取什么治疗措施？  基于文档内容（相似度: 0.466），IIIC1期（累及盆腔淋巴结）的治疗推荐如下： - I级推荐：盆腔±腹主动脉旁体外放疗（EBRT） + 阴道近距离放疗 + 同步含铂化疗。 - II级推荐：盆腔±腹主动脉旁体外放疗（EBRT） + 阴道近距离放疗。 - III级推荐：新辅助化疗 + 盆腔±腹主动脉旁体外放疗 + 阴道近距离放疗 + 同步含铂化疗。  这些推荐基于分层（影像学检查），强调综合治疗，以放疗和化疗为主。文档中未指定具体化疗方案，但同步含铂化疗是核心组成部分。 | A | A | A |
| **Question 62: 在宫颈癌治疗中，如果分期为IIIC2期，应该采取什么治疗措施？** | | | | |
| Chunk size=512, Overlap=0 Using TokenTextSplitter | 在宫颈癌治疗中，如果分期为IIIC2期，应该采取什么治疗措施？ 回答:  IIIC2期宫颈癌指累及主动脉旁淋巴结（需注明基于影像学[r]或病理学[p]证据）。治疗首选同步放化疗（体外放疗 + 阴道近距离放疗 + 铂类为基础的同步化疗），可能需延伸放疗野至腹主动脉旁区域。  - 依据:   - [相似度: 0.459] 片段明确："FIGO分期中则分别为ⅢC1和ⅢC2...对于局部晚期宫颈癌的治疗，指南推荐首选同期放化疗。"   - [相似度: 0.460] 片段提到："腹主动脉旁淋巴结转移归为ⅢC2期...治疗前淋巴分期可辅助制定方案，但首选仍是放化疗。"   - [相似度: 0.553] 片段强调同步放化疗为IB～IVA期的首选，IIIC2期适用此原则。   文档未提及手术作为首选，因此同步放化疗是标准方案。 | A | A | A |
| Chunk size=256, Overlap=100 Using SentenceSplitter | 在宫颈癌治疗中，如果分期为IIIC2期，应该采取什么治疗措施？  在提供的文档中，没有直接或间接提及IIIC2期（主动脉旁淋巴结转移）的特定治疗措施。文档（相似度: 0.466）仅详细描述了IIIC1期的治疗推荐，并在IIIC期整体部分提到“分层：病理细胞学”的推荐（盆腔体外放疗 + 阴道近距离放疗 + 同步含铂化疗），但未明确区分IIIC2期。其他片段（如相似度: 0.545）定义了IIIC2期，但未提供治疗细节。因此，在知识库中未找到答案。 | D | D | D |
| **Question 63: 在宫颈癌治疗中，如果分期为IVA期且无淋巴结肿大，应该采取什么治疗措施？** | | | | |
| Chunk size=512, Overlap=0 Using TokenTextSplitter | 在宫颈癌治疗中，如果分期为IVA期且无淋巴结肿大，应该采取什么治疗措施？  治疗措施：I级推荐：根治性放疗± 铂类为基础的同步化疗。 - 依据：上下文指出： IVA期（定义为肿瘤侵犯膀胱或直肠黏膜，或超出真骨盆）无论淋巴结状态（无淋巴结肿大），首选根治性放疗（包括外照射和腔内近距离放疗）或同步放化疗。化疗方案通常基于顺铂。 | A | A | A |
| Chunk size=256, Overlap=100 Using SentenceSplitter | 在宫颈癌治疗中，如果分期为IVA期且无淋巴结肿大，应该采取什么治疗措施？  答案：  基于文档上下文，IVA期定义为癌瘤浸润膀胱和（或）直肠黏膜，但未扩散超出真骨盆。文档中提到，对于累及膀胱和（或）直肠的中心性病灶（即IVA期），如有可能全部切除时，可以选择盆腔脏器切除术（盆腔廓清术）。例如：  - “IV期：以放疗为主，或采用化疗和放疗综合治疗。对那些累及膀胱和（或）直肠的中心性病灶，如有可能全部切除时，可以选择盆腔脏器切除术。”  - “4.1.4 FIGO ⅣA 期或复发宫颈癌 ⅣA 期仅有中心病灶但未累及骨盆或远处转移的患者极少。初治或复发时属于这种情况可考虑盆腔廓清术。”  文档未专门讨论淋巴结肿大状态对IVA期治疗的影响，但针对无淋巴结肿大的中心病灶，盆腔脏器切除术是可行的选项。放疗和化疗也可能作为辅助或替代方案，但上下文未提供无淋巴结肿大时的具体分层推荐。 | D | D | D |
| **Question 64: 在宫颈癌治疗中，如果分期为IVA期且有淋巴结肿大，应该采取什么治疗措施？** | | | | |
| Chunk size=512, Overlap=0 Using TokenTextSplitter | 在宫颈癌治疗中，如果分期为IVA期且有淋巴结肿大，应该采取什么治疗措施？  治疗措施I级推荐：根治性放疗或同步放化疗（CCRT），并根据淋巴结肿大位置调整放疗野（如扩展至盆腔或腹主动脉旁区域）。 - 上下文指出： IVA期本身已属局部晚期，淋巴结肿大（可能为IIIC期特征）不影响基本治疗原则，但需在放疗计划中纳入淋巴结受累区域（如盆腔或腹主动脉旁），以增强局部控制。同步放化疗是首选，化疗方案以顺铂为基础。 | A | B | A |
| Chunk size=256, Overlap=100 Using SentenceSplitter | 在宫颈癌治疗中，如果分期为IVA期且有淋巴结肿大，应该采取什么治疗措施？  在提供的文档中，没有直接或间接提及IVA期且有淋巴结肿大的特定治疗措施。文档（相似度: 0.552）概述了IV期的一般治疗原则（放疗为主或化疗放疗综合治疗），但未针对淋巴结肿大进行区分。片段（如相似度: 0.469）定义了IVA期，但未讨论淋巴结状态的影响。因此，在知识库中未找到答案。 | D | D | D |
| **Question 65: 在宫颈癌治疗中，如果分期为IVB期，应该采取什么治疗措施？** | | | | |
| Chunk size=512, Overlap=0 Using TokenTextSplitter | 在宫颈癌治疗中，如果分期为IVB期，应该采取什么治疗措施？  治疗措施：推荐全身化疗为主，可结合姑息性放疗或靶向治疗。 - 依据：上下文指出 IVB期（定义为远处转移，如腹腔、肺或骨转移）以全身治疗为核心，首选含铂化疗方案（如卡铂/紫杉醇）。放疗用于缓解症状（如骨转移疼痛），靶向治疗（如贝伐珠单抗）可考虑在特定情况下添加。治疗目标是姑息和控制疾病进展。  注意：以上所有治疗措施均源自指定文献，具体方案需由临床医生根据患者个体情况（如年龄、并发症）调整。其他来源（如手术学书籍）未直接涉及晚期治疗决策，因此未引用。 | A | A | A |
| Chunk size=256, Overlap=100 Using SentenceSplitter | 在宫颈癌治疗中，如果分期为IVB期，应该采取什么治疗措施？  基于文档内容（相似度: 0.542），IVB期（癌瘤扩散超出真骨盆）的治疗原则如下： - 一般以系统性治疗（如化疗）为主。 - 部分患者可联合个体化放疗。  文档强调系统性治疗是核心，放疗作为辅助手段，具体方案需根据患者情况个体化调整。未提供更多细节如化疗药物或放疗剂量。  # | C | C | C |
| **Question 66: 早期宫颈癌根治手术后，如果腹主动脉淋巴结阴性但存在高危因素，应该采取什么治疗措施？** | | | | |
| Chunk size=512, Overlap=0 Using TokenTextSplitter | 早期宫颈癌根治手术后，如果腹主动脉淋巴结阴性但存在高危因素，应该采取什么治疗措施？  根据文档内容，早期宫颈癌根治手术后，如果腹主动脉淋巴结阴性但存在高危因素，推荐的治疗措施如下：  - I级推荐：盆腔体外放疗 + 含铂同步化疗 ± 近距离放疗。  - II级推荐：序贯放化疗（即先化疗后放疗）。  这些推荐基于术后辅助治疗的分层策略，目的是降低复发风险并改善无进展生存期。文档明确指出，具备高危因素时，需进一步影像学检查排除远处转移，若无转移，则采用上述放疗和化疗联合方案（来源：[相似度: 0.548]片段中的"9 早期宫颈癌根治术后辅助治疗"部分）。 | A | B | B |
| Chunk size=256, Overlap=100 Using SentenceSplitter | 早期宫颈癌根治手术后，如果腹主动脉淋巴结阴性但存在高危因素，应该采取什么治疗措施？  根据文档内容，早期宫颈癌根治手术后，如果腹主动脉淋巴结阴性但存在高危因素（如手术切缘阳性、淋巴结转移或宫旁扩散），推荐以下治疗措施： - I级推荐：盆腔体外放疗（EBRT） + 含铂同步化疗 ± 近距离放疗（如阴道近距离放疗）。 - II级推荐：序贯放化疗（即先化疗后放疗）。 - 依据：文档中明确指出，高危因素包括手术切缘阳性、淋巴结转移或宫旁扩散。术后辅助治疗（PORT）应包含盆腔体外放疗和同步化疗，以改善生存率（见[相似度: 0.576]片段："腹主动脉淋巴结阴性 分层:高危因素a I级推荐：盆腔体外放疗c + 含铂同步化疗 ± 近距离放疗d II级推荐：序贯放化疗e"）。GOG109研究显示这种方案有总体生存优势。  # | A | A | A |
| **Question 67: 早期宫颈癌根治手术后，如果腹主动脉淋巴结阴性但存在中危因素，应该采取什么治疗措施？** | | | | |
| Chunk size=512, Overlap=0 Using TokenTextSplitter | 早期宫颈癌根治手术后，如果腹主动脉淋巴结阴性但存在中危因素，应该采取什么治疗措施？  答案：腹主动脉淋巴结阴性但存在中危因素（如肿瘤大小、间质浸润深度、淋巴脉管间隙浸润LVSI阳性）时，I级推荐为盆腔体外放疗（EBRT）±阴道近距离放疗。III级推荐可考虑盆腔体外放疗联合含铂同步化疗±近距离放疗，但I级推荐是首选。   - 依据：文档指出（[相似度: 0.624]）：“分层:中危因素b I级推荐：盆腔体外放疗 ± 近距离放疗”。中危因素参考“Sedlis标准”（基于肿瘤大小、间质浸润和LVSI状态），病理类型如腺癌可能增加风险，但辅助治疗以放疗为主。 | A | A | A |
| Chunk size=256, Overlap=100 Using SentenceSplitter | 早期宫颈癌根治手术后，如果腹主动脉淋巴结阴性但存在中危因素，应该采取什么治疗措施？  根据文档内容，早期宫颈癌根治手术后，如果腹主动脉淋巴结阴性但存在中危因素（如肿瘤直径>4cm、淋巴脉管浸润或宫颈深间质浸润），推荐以下治疗措施： - I级推荐：盆腔体外放疗（EBRT） ± 近距离放疗（如阴道近距离放疗）。 - III级推荐：盆腔体外放疗 + 含铂同步化疗 ± 近距离放疗（但仅在特定情况下考虑，如具有多个中危因素）。 - 依据：文档强调，中危因素包括肿瘤大小>4cm、淋巴脉管浸润或深间质浸润。具有2个中危因素时需补充术后放疗，但不加同期化疗（见[相似度: 0.576]片段："腹主动脉淋巴结阴性 分层:中危因素b I级推荐：盆腔体外放疗 ± 近距离放疗 III级推荐：盆腔体外放疗 + 含铂同步化疗 ± 近距离放疗"）。低危患者（无高中危因素）则无需辅助治疗。  # | A | A | A |
| **Question 68: 早期宫颈癌根治手术后，如果腹主动脉淋巴结阳性但无远处转移，应该采取什么治疗措施？** | | | | |
| Chunk size=512, Overlap=0 Using TokenTextSplitter | 早期宫颈癌根治手术后，如果腹主动脉淋巴结阳性但无远处转移，应该采取什么治疗措施？  根据文档内容，早期宫颈癌根治手术后，如果腹主动脉淋巴结阳性但无远处转移，推荐的治疗措施如下：  - I级推荐：延伸野放疗（覆盖盆腔和腹主动脉旁区域） + 含铂同步化疗 ± 近距离放疗。  文档指出，需通过影像学或活检确认无远处转移。延伸野放疗旨在覆盖潜在转移区域，化疗（如顺铂或卡铂）用于增敏。此方案可降低局部复发风险并改善生存率（来源：[相似度: 0.548]片段中的"9 早期宫颈癌根治术后辅助治疗"部分）。 | B | B | B |
| Chunk size=256, Overlap=100 Using SentenceSplitter | 早期宫颈癌根治手术后，如果腹主动脉淋巴结阳性但无远处转移，应该采取什么治疗措施？  根据文档内容，早期宫颈癌根治手术后，如果腹主动脉淋巴结阳性但无远处转移，推荐以下治疗措施： - I级推荐：延伸野放疗（覆盖腹主动脉旁区域） + 含铂同步化疗 ± 近距离放疗。 - 依据：文档指出，腹主动脉淋巴结阳性且无远处转移时，应行延伸野放疗（扩展至腹主动脉旁区域）联合同步化疗，以控制潜在转移（见[相似度: 0.576]片段："腹主动脉淋巴结阳性 分层:无远处转移 I级推荐：影像学或活检提示阴性者行延伸野放疗 + 含铂同步化疗 ±近距离放疗"）。剂量通常为45-50Gy，调强放疗（IMRT）可减少不良反应。  # | A | A | A |
| **Question 69: FIGO分期IA1期宫颈癌患者的手术治疗选择有哪些？是否适用于保留生育能力的患者？** | | | | |
| Chunk size=512, Overlap=0 Using TokenTextSplitter | FIGO分期IA1期宫颈癌患者的手术治疗选择有哪些？是否适用于保留生育能力的患者？  根据文档内容，FIGO分期IA1期宫颈癌患者的手术治疗选择及保留生育能力的适用性如下：  - 手术治疗选择：   - 对于需保留生育功能且LVSI(-)（淋巴脉管间隙浸润阴性）的患者：可行宫颈锥切术，切缘阴性者随访观察。   - 对于不需保留生育功能或老年患者：推荐筋膜外全子宫切除术。   - 如果LVSI(+)，应行改良根治性子宫切除 + 盆腔淋巴结切除术（不适用于保留生育功能）。   手术途径可选择开腹、经阴道或腹腔镜进行。  - 是否适用于保留生育能力：是，适用于保留生育能力的患者。具体而言，如果LVSI(-)，宫颈锥切术是首选方案，可保留生育功能；切缘阴性后，仅需随访，无需进一步手术。但如果LVSI(+)，则不适合保留生育功能，需更广泛的手术（来源：[相似度: 0.553]片段中的"4.1.1.1 ⅠA1 期"部分）。 | A | A | A |
| Chunk size=256, Overlap=100 Using SentenceSplitter | FIGO分期IA1期宫颈癌患者的手术治疗选择有哪些？是否适用于保留生育能力的患者？  根据文档内容，FIGO分期IA1期宫颈癌患者的手术治疗选择如下： - 手术治疗选择：  - 保留生育功能者：如果淋巴脉管间隙浸润（LVSI）阴性，推荐宫颈锥切术（切缘阴性者随访）。如果LVSI阳性，应行改良根治性子宫切除 + 盆腔淋巴结切除术。  - 不保留生育功能者：推荐筋膜外全子宫切除术（可选择开腹、经阴道或腹腔镜手术）。 - 是否适用于保留生育能力的患者：是的，适用于保留生育能力的患者。保留生育功能者可以选择宫颈锥切术（LVSI阴性时），或根治性宫颈切除术（如经腹、经阴道或腹腔镜手术）联合盆腔淋巴结切除术（LVSI阳性时）。 - 依据：文档明确描述了IA1期的处理方案（见[相似度: 0.591]片段："4.1.1.1 ⅠA1 期 需保留生育功能者，LVSI（-）可行宫颈锥切术...不需保留生育功能和老年女性推荐筋膜外全子宫切除术"和[相似度: 0.534]片段表4："FIGO 2018保留生育功能：锥切术"）。保留生育功能的选项在多个片段中被强调（如[相似度: 0.549]片段）。  # | A | A | A |
| **Question 70: 在FIGO分期IB2期和IIA1期患者中，什么因素决定手术和放疗的选择？两种治疗方式的结果有什么不同？** | | | | |
| Chunk size=512, Overlap=0 Using TokenTextSplitter | 在FIGO分期IB2期和IIA1期患者中，什么因素决定手术和放疗的选择？两种治疗方式的结果有什么不同？  根据文档内容，FIGO分期IB2期和IIA1期患者中，手术和放疗的选择取决于以下因素，且两种治疗方式的结果相似：  - 决定因素：   - 患者因素：年龄（年轻患者尤其45岁以下优先手术以保留卵巢功能和性功能）、生育要求、全身状况（如无手术禁忌证）。   - 肿瘤因素：肿瘤大小、组织学类型（如腺癌可能更倾向放疗）、LVSI状态。   - 资源因素：当地卫生资源可用性（如放疗设备是否完备）。   文档强调，手术和放疗是等效的初治选择，取决于个体化评估（来源：[相似度: 0.624]片段中的"FIGO ⅠB2/ⅡA1 期"部分）。  - 治疗结果的不同：   - 疗效：手术和放疗的5年生存率、死亡率和并发症发生率相似，二者疗效相当。   - 手术优势：手术可提供准确的术后病理分期，便于制定个体化后续治疗；能去除耐放疗肿瘤；对年轻女性可保留卵巢功能（通过卵巢移位）；是保留性功能的首选。   - 放疗优势：适用于有手术禁忌证的患者，避免手术并发症（如泌尿道损伤）。   文档未提及显著生存率差异，但指出微创手术（如腹腔镜）可能比开腹手术复发率更高，需进一步研究（来源：[相似度: 0.624]片段中的"FIGO ⅠB2/ⅡA1 期"部分和[相似度: 0.577]片段中的"IB1期、IB2期、IIA1期"部分）。 | B | B | B |
| Chunk size=256, Overlap=100 Using SentenceSplitter | 在FIGO分期IB2期和IIA1期患者中，什么因素决定手术和放疗的选择？两种治疗方式的结果有什么不同？  根据文档内容，FIGO分期IB2期和IIA1期患者的治疗选择取决于以下因素，且两种治疗方式的结果相似： - 决定因素：  - 患者因素：年龄（年轻患者，特别是<45岁且希望保留卵巢和性功能者首选手术）、生育意愿、是否合并手术禁忌证（如麻醉风险）、以及肿瘤特性（如是否耐放疗）。  - 资源因素：当地卫生资源可用性（如放疗设备是否充足）。在放疗资源匮乏地区，手术可能更可行。 - 治疗方式结果比较：  - 手术 vs 放疗：两种方式疗效相当，5年生存率、死亡率和并发症发生率相似。手术优势包括：保留卵巢功能（可通过卵巢移位避免放疗损伤）、提供准确的组织病理分期以指导后续个体化治疗、去除耐放疗肿瘤。放疗可能导致相关并发症（如阴道萎缩或直肠反应），尤其对未绝经患者不利。  - 具体结果：文档指出，早期宫颈癌的手术与根治性放疗在局部控制和生存率方面效果相同（见[相似度: 0.575]片段："早期宫颈癌的手术与根治性放疗两者的疗效相当，5年生存率、死亡率、并发症发生率相似"）。但手术更适合年轻患者以保留功能，而放疗在手术禁忌时是替代方案。 - 依据：文档详细讨论了IB2/IIA1期的选择（见[相似度: 0.549]片段："初治包括手术或放疗，取决于患者因素和当地卫生资源，二者疗效相当。手术优势体现在...手术是需要保留卵巢和性功能的年轻女性首选治疗方式"和[相似度: 0.521]片段："对于未绝经患者，特别是年龄小于45岁且无手术禁忌证的患者可选择手术治疗"）。  所有回答均基于提供的文档片段，未添加外部知识。如果文档中未明确提及某些细节（如具体生存率数据），我会避免推测。 搜索这里重新开始 | A | A | A |
| **Question 71: FIGO分期IB3期宫颈癌推荐的首选治疗是什么？** | | | | |
| Chunk size=512, Overlap=0 Using TokenTextSplitter | 71. FIGO分期IB3期宫颈癌推荐的首选治疗是什么？ 根据文档内容，FIGO IB3期宫颈癌的首选治疗是同步放化疗（CCRT）。具体依据如下： - 在多个片段中提到，IB3期属于局部晚期宫颈癌，首选治疗是铂为基础的同期放化疗（CCRT）。例如：  - [相似度: 0.607]片段："FIGO ⅠB3/ⅡA2 期...首选同步放化疗（CCRT）是ⅠB3/ⅡA2 期患者更好的治疗方式。"  - [相似度: 0.583]片段："铂为基础的同期放化疗（CCRT）是ⅠB3/ⅡA2 期患者更好的治疗方式。"  - [相似度: 0.555]片段："CCRT 是ⅠB3 期和ⅡA2 期的标准治疗方法。" - 文档强调，手术不作为首选，因为约80%的患者术后需要辅助放疗，会增加并发症风险（如双重治疗导致的严重不良反应）。在放疗资源匮乏地区，可考虑新辅助化疗（NACT）后手术，但这仅作为替代方案，且存在争议。 - 总结：IB3期宫颈癌的首选治疗是同步放化疗（CCRT），包括外照射放疗（EBRT）和腔内近距离放疗（ICRT），联合同期铂类化疗。 | A | A | A |
| Chunk size=256, Overlap=100 Using SentenceSplitter | FIGO分期IB3期宫颈癌推荐的首选治疗是什么？  基于文档内容，FIGO IB3期宫颈癌的首选治疗是同期放化疗（CCRT）。文档明确指出： - “ⅠB3期和ⅡA2期尽管可选择手术，但不推荐手术作为首选初始治疗。因为80%患者需要PORT或CCRT。手术加放疗会增加并发症从而影响生活质量。双重治疗模式也增加了不必要的手术和放疗资源负担。因此，CCRT是ⅠB3期和ⅡA2期的标准治疗方法。”（相似度0.630片段） - CCRT包括外照射（EBRT）和腔内近距离放射治疗（ICRT）。文档还提到，在放疗资源稀缺地区，可考虑新辅助化疗（NACT）后手术，但这仅作为替代方案，且存在争议：“对于IB3期、IIA2期宫颈癌采用新辅助化疗加手术的治疗模式还存在争议，一般仅建议用于放疗不可及区域或者临床研究。”（相似度0.593片段）  因此，首选治疗是同期放化疗（CCRT），手术不作为初始推荐。 | A | C | C |
| **Question 72: 不同类型根治性子宫切除术的区别是什么？适用于哪些患者？** | | | | |
| Chunk size=512, Overlap=0 Using TokenTextSplitter | 不同类型根治性子宫切除术的区别是什么？适用于哪些患者？ 文档详细描述了根治性子宫切除术的类型（基于Q-M分型或Piver-Rutledge分型），包括A型、B型和C型，区别主要在于切除范围和输尿管处理。具体如下： - A型（筋膜外子宫切除术）：  - 区别：切除范围最小，仅切除子宫和宫颈，不涉及输尿管隧道；主韧带和宫骶韧带在宫颈边缘切断；阴道切缘无切除。  - 适用患者：FIGO IA1期宫颈癌（无淋巴脉管间隙浸润）。  - 来源：[相似度: 0.555]片段（表2描述）和[相似度: 0.449]片段。  - B型（改良根治性子宫切除术）：  - 区别：切除范围中等，包括子宫、宫颈和阴道上段1-2 cm；输尿管隧道顶部打开并侧推；部分切除膀胱宫颈韧带和宫骶韧带。  - 适用患者：IA1期伴淋巴脉管间隙浸润（LVSI+）或IA2期宫颈癌。  - 来源：[相似度: 0.555]片段和[相似度: 0.449]片段。  - C型（根治性子宫切除术）：  - 区别：切除范围最大，包括子宫、宫颈、阴道上段1/4-1/3；输尿管完全游离；主韧带贴盆壁切断，宫骶韧带近骶骨端切断；需切除盆腔淋巴结。  - 适用患者：IB1期、IB2期和经选择的IIA1期宫颈癌（尤其肿瘤直径<2 cm的低危患者）。在低危病例中，可考虑保留神经的术式以减少并发症。  - 来源：[相似度: 0.607]片段和[相似度: 0.449]片段。  - 额外说明：  - 手术途径可选择开腹、腹腔镜或机器人手术，但微创手术在早期宫颈癌中可能增加复发风险（基于LACC试验）。  - 淋巴结切除术是基本步骤，切除范围包括宫旁、闭孔、髂内、髂外和髂总淋巴结。  - 适用患者总结：A型用于早期低危（IA1期），B型用于中危（IA1伴LVSI+或IA2期），C型用于高危（IB1-IB2/IIA1期）。 | C | B | B |
| Chunk size=256, Overlap=100 Using SentenceSplitter | 不同类型根治性子宫切除术的区别是什么？适用于哪些患者？  文档中详细描述了根治性子宫切除术的类型（基于Piver-Rutledge分型和Q-M分型），包括切除范围、适应证和手术入路。以下是基于文档（相似度0.537、0.521、0.499等片段）的总结： - 筋膜外子宫切除术（A型或I型）：  - 区别：切除范围最小，仅切除子宫和宫颈，不涉及输尿管、主韧带和宫骶韧带的深层分离。阴道切缘无切除，膀胱仅下推至膀胱底。  - 适用患者：FIGO IA1期宫颈癌（无淋巴脉管间隙浸润），尤其适用于低风险病例或保留生育功能者。 - 改良根治性子宫切除术（B型或II型）：  - 区别：切除范围中等，包括子宫、宫颈、部分阴道上段（约1/4），分离输尿管隧道但不完全游离。主韧带和宫骶韧带在宫颈边缘切断，膀胱下推至宫颈下方。  - 适用患者：FIGO IA2期宫颈癌（可能伴淋巴结转移风险），或低风险IB1期（肿瘤<2cm、间质浸润<50%、无淋巴结转移影像学证据）。 - 根治性子宫切除术（C型或III型）：  - 区别：切除范围最大，包括子宫、宫颈、阴道上段1/3~1/2，完全游离输尿管，主韧带和宫骶韧带近盆壁或骶骨端切断。膀胱下推至阴道中段，直肠下推至宫颈下方。  - 适用患者：FIGO IB1期、IB2期、IIA1期宫颈癌（标准治疗），尤其适用于肿瘤较大或有高危因素者。文档强调：“C型根治性子宫切除术的宫颈癌手术的基本术式”（相似度0.499片段）。 - 其他类型：文档还提到D型（更广泛，用于晚期）和盆腔廓清术（用于IV期或复发），但未详细描述区别。  适用患者总结： - A型：IA1期（低风险）。 - B型：IA2期或低风险IB1期。 - C型：IB1期、IB2期、IIA1期（标准选择）。 手术入路均可选择开腹、腹腔镜或机器人手术，但文档指出微创手术（腹腔镜/机器人）在早期宫颈癌中复发率较高，需谨慎（相似度0.484片段）。 | A | A | A |
| **Question 73: IMRT（调强放疗）在宫颈癌放疗中的优势是什么？** | | | | |
| Chunk size=512, Overlap=0 Using TokenTextSplitter | IMRT（调强放疗）在宫颈癌放疗中的优势是什么？ IMRT在宫颈癌放疗中的主要优势是减少正常组织损伤，从而降低不良反应并可能提高生存率。具体依据如下： - 在[相似度: 0.448]片段中明确提到："IMRT 因小肠、直肠和膀胱的接受的剂量减少，5年总生存期和无进展生存期显著提高（分别为35.4% vs. 21.4%，26.1% vs. 15.1%），优于常规同期放化疗。" 这表明IMRT通过精确靶向肿瘤，减少了周围器官（如小肠、直肠、膀胱）的辐射剂量。 - 在[相似度: 0.448]片段补充："调强放疗（IMRT）是一种先进和精细的放射技术，可减少不良反应。" 这强调了IMRT在降低并发症（如放射性肠炎、膀胱炎）方面的优势。 - 优势总结：  - 减少不良反应：通过剂量优化，保护正常组织，降低晚期并发症风险（如瘘管、功能障碍）。  - 提高治疗效果：可能改善生存率和无进展生存期，尤其适用于术后辅助放疗或复发治疗。  - 适用场景：常用于盆腔放疗，特别是当需要避免叠加手术并发症时（如术后辅助放疗）。 | A | A | A |
| Chunk size=256, Overlap=100 Using SentenceSplitter | IMRT（调强放疗）在宫颈癌放疗中的优势是什么？  文档中提到了IMRT（调强放疗）的优势，主要基于其精确性和减少并发症的特点： - 优势：  - 精确靶区覆盖和减少正常组织损伤：文档指出，“推荐以影像引导（CT或MR）为基础的适形调强放疗技术...对于图像引导的EBRT，高剂量区域必须注意避开正常组织或严格限制正常组织的照射剂量。”（相似度0.487片段）。这表示IMRT通过影像引导实现高度适形，能精确针对肿瘤区域，同时避开膀胱、直肠等正常器官，降低晚期并发症（如直肠炎、膀胱炎）。  - 允许剂量加量和个体化治疗：文档提到，“不可切除的淋巴结可以通过高度适形的放疗技术，给予同步加量或后程推量10~15Gy”（相似度0.487片段）。IMRT支持对高危区域（如淋巴结转移）进行强化照射，而不增加周围组织剂量。  - 改善临床效果：在“中晚期宫颈癌的放（化）疗”部分，文档强调IMRT技术“促进了放射治疗的实践，改善临床效果并降低毒性”（相似度0.549片段）。  因此，IMRT的优势在于提高放疗精确性、减少正常组织毒副作用，并支持个体化剂量调整。 | A | A | A |
| **Question 74: 宫颈癌复发的常见部位有哪些？如何监测复发风险？** | | | | |
| Chunk size=512, Overlap=0 Using TokenTextSplitter | 宫颈癌复发的常见部位有哪些？如何监测复发风险？ 文档提供了复发部位和监测方法的详细信息： - 常见复发部位：  - 盆腔是最常见的复发部位（无论手术或放疗后）。  - 腹主动脉旁淋巴结是第二常见的复发部位。  - 其他部位包括阴道顶部、宫旁组织、远处转移（如肺、肝、骨），但盆腔和淋巴结是主要焦点。  - 来源：[相似度: 0.519]片段："盆腔是最常见的复发部位" 和 "腹主动脉旁淋巴结是第二常见的复发部位"。  - 监测复发风险的方法：  - 细胞学检查：每次随访行阴道顶部/宫颈细胞学检查（如TCT），但放疗后结果可能难以评估，需结合组织学确认。  - 组织学确诊：对可疑复发，活检是必要的；活检应在放疗结束后至少3个月进行，以避免假阳性。方法包括针吸活检（在CT或B超引导下）或宫颈管诊刮。  - 影像学检查：根据症状选择胸片、B超、CT、MRI或PET/CT，用于评估转移（如锁骨上淋巴结肿大、腹主动脉旁转移）。  - 实验室检查：肿瘤标志物检测（如SCC、CEA），但需结合临床。  - 来源：[相似度: 0.519]片段："每次随访都应行阴道顶部/宫颈的细胞学检查...组织学确诊肿瘤复发是十分必要的。活检时间至少要在放疗结束后3个月进行。针吸活检是另一种行之有效...方法。" 和 [相似度: 0.519]片段："还应根据症状、体征、可疑复发部位，选择性行胸片、B超、CT等检查。"  - 总结：复发风险监测依赖于多模态随访，重点是早期发现盆腔和淋巴结复发。 | B | B | B |
| Chunk size=256, Overlap=100 Using SentenceSplitter | 宫颈癌复发的常见部位有哪些？如何监测复发风险？  文档中提供了复发部位和监测方法的信息： - 常见复发部位：  - 盆腔和中心部位：文档多次提到“盆腔复发”和“中心性复发”（如宫颈、宫体、阴道、膀胱或直肠），例如：“复发部位包括盆腔、中心部位...宫颈癌放疗后盆腔复发”（相似度0.507片段）和“中心性复发可考虑手术治疗”（相似度0.549片段）。  - 远处转移：包括骨、肺、肝等，如“伴骨转移时的疼痛治疗”（相似度0.507片段）和“远处转移如淋巴结、肺、肝或骨寡转移”（相似度0.454片段）。 - 监测复发风险的方法：  - 体格检查和细胞学检查：文档强调随访时“每次随访都应行阴道顶部/宫颈的细胞学检查，可以发现早期中心复发的病人”（相似度0.463片段）。同时，“体格检查中应注意观察外阴、阴道、阴道穹隆、宫颈局部肿瘤消失情况，有无复发”。  - 影像学检查：推荐使用“影像学检查如胸片、B超、CT、肌酐清除率和肝功能等”（相似度0.507片段），特别针对可疑复发部位。文档提到“影像检查（r）：推荐MR、CT或PET/CT”（相似度0.487片段）以评估转移。  - 病理和风险因素评估：复发风险与初始治疗因素相关，如“复发与病变直径和间质浸润深度有关”（相似度0.471片段），肿瘤>4cm、LVSI阳性等增加风险。  总结：常见复发部位为盆腔（包括中心性）和远处转移（如骨、肺）；监测通过定期细胞学检查、影像学（CT/MR/PET-CT）和临床评估实现。 | C | C | C |
| **Question 75: 复发性宫颈癌推荐的治疗策略有哪些？手术、放疗和化疗能否联合使用？** | | | | |
| Chunk size=512, Overlap=0 Using TokenTextSplitter | 复发性宫颈癌推荐的治疗策略有哪些？手术、放疗和化疗能否联合使用？ 复发性宫颈癌的治疗策略基于复发部位、首次治疗方式和患者状况，文档推荐个体化方案，且手术、放疗和化疗可以联合使用。  - 推荐治疗策略：  - 中心性复发（如宫颈、阴道、膀胱/直肠受累）：  - 首选手术治疗（如盆腔廓清术），尤其适用于放疗后复发且无远处转移者。  - 替代方案：近距离放疗或个体化外照射放疗（EBRT）。  - 来源：[相似度: 0.491]片段（表格）："中心性复发：手术治疗（盆腔廓清术）" 或 "近距离放疗"。  - 非中心性复发（如盆腔侧壁或放疗野外）：  - 既往未放疗：手术切除 ± 术后放疗 ± 化疗。  - 既往放疗：系统治疗（化疗） ± 个体化放疗（如调强放疗IMRT或立体定向放疗SBRT）。  - 来源：[相似度: 0.491]片段："非中心性复发：系统治疗 ± 个体化EBRT"。  - 远处转移（如肺、肝、骨）：  - 首选系统治疗（化疗），联用姑息性放疗缓解症状。  - 对寡转移灶，可考虑局部治疗（如手术或放疗）。  - 来源：[相似度: 0.491]片段："远处转移：系统治疗 ± 营养与支持治疗"。  - 一般原则：首次治疗为手术者，复发后首选放疗；首次为放疗者，复发后首选手术（如可行）。化疗常用于控制微转移或作为同步治疗。  - 能否联合使用手术、放疗和化疗：  - 是，文档明确支持联合使用。例如：  - 手术联合术后放疗和化疗：用于高危复发患者（如淋巴结阳性或切缘阳性）。  - 放疗联合化疗：作为同步放化疗（CCRT），用于局部复发。  - 具体例子：[相似度: 0.491]片段："手术切除 ± 术后个体化EBRT ± 近距离放疗 ± 系统治疗" 和 [相似度: 0.519]片段："手术、放疗和化疗综合治疗均有人主张"。  - 联合治疗的益处：提高局部控制率、减少复发风险，但需权衡并发症（如双重治疗增加不良反应）。  - 总结：策略包括手术（用于中心性复发）、放疗（用于非中心性或术后复发）、化疗（用于远处转移），三者可联合使用，尤其在高危或复杂病例中。治疗选择需基于多学科评估。 | A | A | A |
| Chunk size=256, Overlap=100 Using SentenceSplitter | 复发性宫颈癌推荐的治疗策略有哪些？手术、放疗和化疗能否联合使用？  文档详细描述了复发性宫颈癌的治疗策略，并明确支持联合使用多种疗法： - 推荐治疗策略（基于复发部位和既往治疗）：  - 既往未接受放疗或复发在放疗野外：  - I级推荐：手术切除（如可切除）±术后个体化EBRT±近距离放疗±系统治疗（化疗）（相似度0.549片段）。  - 替代方案：个体化EBRT±近距离放疗±系统治疗。  - 既往接受放疗或复发在放疗野内：  - 中心性复发：I级推荐为手术治疗（盆腔廓清术），II级为系统治疗±姑息治疗（相似度0.549片段）。  - 非中心性复发：推荐系统治疗（化疗）±个体化EBRT（可考虑SBRT）或手术切除±术中放疗（IORT）（相似度0.549片段）。  - 远处转移：以系统治疗（化疗）为主，±局部放疗（如寡转移）（相似度0.454片段）。文档提到“系统性治疗 ± 针对肿瘤局部放疗或同步放化疗”（相似度0.487片段）。 - 手术、放疗和化疗能否联合使用：  - 是，可以联合使用。文档明确支持多模式治疗：  - 例如，“手术切除±术后个体化EBRT±近距离放疗±系统治疗”（相似度0.549片段），表明手术后可联合放疗和化疗。  - 对于放疗后复发，“系统治疗±个体化EBRT”（相似度0.549片段）或“化疗和放疗综合治疗”（相似度0.534片段）。  - 文档还强调“综合治疗”在复发处理中的重要性，如“难治性复发肿瘤患者需要根据个体情况，采取综合的治疗方法”（相似度0.531片段）。  总结：治疗策略基于复发部位个体化，包括手术、放疗、化疗或其组合；联合使用（如手术+放疗+化疗）是推荐且可行的，尤其适用于可切除病灶或控制症状。 | A | A | A |
| **Question 76: 转移性宫颈癌的治疗策略有哪些？不同转移部位是否有特异性治疗？** | | | | |
| Chunk size=512, Overlap=0 Using TokenTextSplitter | 转移性宫颈癌的治疗策略有哪些？不同转移部位是否有特异性治疗？ 基于文档内容： - 治疗策略：转移性宫颈癌（如FIGO IVB期）的治疗以系统性治疗为主，辅以个体化放疗和支持治疗。具体策略包括：  - 系统性治疗：首选化疗，常用含铂方案（如顺铂单药或联合紫杉醇、拓扑替康等）。对于体力状态较好的患者，推荐姑息性化疗或参与临床试验（证据来自片段："对于出现盆腔外复发或转移的患者，不适宜放疗或廓清术，推荐化疗或最佳支持治疗"）。  - 放疗：用于缓解症状或控制局部病灶，如骨转移疼痛时行姑息性放疗。对于孤立性转移灶（如淋巴结、肺、肝或骨），可考虑立体定向放疗（SBRT）或个体化外照射（EBRT）以改善生存（"对于经过高度选择的、具有可局部治疗的孤立性远处转移的患者，采用局部方案的放疗或消融治疗，可能改善生存"）。  - 支持治疗：包括营养支持、疼痛管理和姑息治疗，尤其适用于难治性病例。 - 不同转移部位的特异性治疗：  - 淋巴结转移：如腹主动脉旁或锁骨上淋巴结转移，推荐延伸野放疗（EFRT）联合同步化疗）。  - 肺、肝或骨寡转移：可考虑局部放疗或手术切除，联合系统性治疗。  - 中心性复发（如盆腔内）：若既往未接受放疗，可考虑手术（如盆腔廓清术）或放疗；若在既往放疗野内复发，则以系统性治疗为主。 - 总结：策略取决于转移部位、范围和既往治疗。系统性治疗是基础，局部治疗用于寡转移以延长生存。 | A | A | A |
| Chunk size=256, Overlap=100 Using SentenceSplitter | 转移性宫颈癌的治疗策略有哪些？不同转移部位是否有特异性治疗？  基于文档内容： - **治疗策略**：  - 对于出现盆腔外复发或转移的患者，不适宜放疗或盆腔廓清术，推荐化疗或最佳支持治疗（如疼痛管理和症状缓解）。化疗虽能缓解疼痛和其他症状，但反应通常持续时间短，生存改善有限。  - 对于经过高度选择的孤立性远处转移（如淋巴结、肺、肝或骨寡转移），可采用局部治疗（如放疗或消融治疗），可能改善生存。局部治疗后，可考虑联合系统治疗（如化疗）。  - 在腹主动脉旁和锁骨上淋巴结阳性的患者中，同期放化疗（CCRT）可能比单纯全身化疗反应更好，总生存率和无病生存期较高。  - 难治性转移性肿瘤患者需个体化综合治疗，包括临终关怀、疼痛咨询、情绪和精神支持。  - 一线系统治疗失败的患者，预后不佳，可接受系统治疗或最佳支持治疗，鼓励参与临床试验。 - **不同转移部位的特异性治疗**：  - **淋巴结转移（如腹主动脉旁或锁骨上）**：推荐同期放化疗（CCRT），可能优于单纯化疗。  - **骨转移**：放疗常用于疼痛缓解（姑息治疗）。  - **肺、肝等孤立性寡转移**：可能受益于局部放疗或消融治疗，后联合系统治疗。  - **盆腔外广泛转移**：以化疗或最佳支持治疗为主，不推荐局部放疗或手术。 - **依据**：文档多次提及复发或转移性宫颈癌的系统治疗（如[相似度: 0.624]、[相似度: 0.587]、[相似度: 0.553]片段），强调化疗和局部治疗的选择取决于转移部位和患者个体情况。 | D | D | D |
| **Question 77: 妊娠期宫颈癌患者的治疗策略有哪些？妊娠早期、中期和晚期的治疗有何不同？** | | | | |
| Chunk size=512, Overlap=0 Using TokenTextSplitter | 妊娠期宫颈癌患者的治疗策略有哪些？妊娠早期、中期和晚期的治疗有何不同？  总体治疗策略：妊娠期宫颈癌需多学科团队评估，优先考虑母体预后和胎儿安全。治疗包括手术、放疗或延迟治疗，取决于肿瘤分期和孕周。 - 不同妊娠阶段的治疗差异：  - 妊娠早期（≤12周）：推荐终止妊娠后立即开始标准治疗（如手术或放化疗），以避免延误治。  - 妊娠中期（13-28周）：可考虑延迟治疗至胎儿可存活（约24周后），期间监测肿瘤；若肿瘤进展快，可进行手术（如宫颈切除术）或化疗（避免放疗）。分娩后完成根治性治疗。  - 妊娠晚期（>28周）：优先延迟治疗至分娩（通常计划早产），产后立即开始根治性治疗（如全子宫切除术或放化疗）。避免在孕期使用放疗。 | B | C | C |
| Chunk size=256, Overlap=100 Using SentenceSplitter | 妊娠期宫颈癌患者的治疗策略有哪些？妊娠早期、中期和晚期的治疗有何不同？  基于文档内容： - 总体原则：妊娠期宫颈癌的管理遵循与非妊娠期相同原则，但需多学科团队参与，权衡母亲和胎儿健康。治疗取决于妊娠阶段、肿瘤分期和患者意愿。 - 分阶段治疗策略：  - 妊娠早期（≤20周）：  - 发现宫颈癌后应及时终止妊娠（通过治疗性流产或清宫术），然后开始宫颈癌治疗（手术或放化疗）。  - 对于早期癌（如IB期、IIA期），无手术禁忌者首选广泛子宫切除及盆腔淋巴结切除术，保留卵巢功能。  - 放疗常导致胚胎自然流产，因此放疗前需终止妊娠。  - 妊娠中期（>20周至孕晚期前）：  - 可考虑推迟根治性治疗以增加胎儿存活能力，尤其对于IA2～IB2期患者。推迟治疗与非妊娠患者相比，预后未显示不良。  - 在维持妊娠的同时，对经选择患者行手术（如广泛宫颈切除术）或化疗（新辅助化疗）。  - 如肿瘤为局部晚期，可行古典式剖宫产终止妊娠，随后行新辅助化疗2-3个疗程，再行根治术。  - 妊娠晚期（≥38周）：  - 行古典式剖宫产终止妊娠，产后尽早开始宫颈癌治疗（如广泛子宫切除术或放化疗）。  - 对于有生育要求者，可在剖宫产同时行根治性手术；无生育要求者立即开始治疗。  - 产后10天内行外放射治疗，待子宫复旧后行腔内放疗。 - 依据：文档详细描述了妊娠期宫颈癌的处理（如[相似度: 0.561]、[相似度: 0.519]、[相似度: 0.535]片段），强调分期和妊娠阶段对决策的影响。  # | A | B | A |
| **Question 78: 妊娠期宫颈癌患者是否适合手术治疗？应该在妊娠哪个阶段考虑手术？** | | | | |
| Chunk size=512, Overlap=0 Using TokenTextSplitter | 妊娠期宫颈癌患者是否适合手术治疗？应该在妊娠哪个阶段考虑手术？ 基于文档内容： - 是否适合手术治疗：是，手术治疗适用于妊娠期宫颈癌患者，尤其对于早期癌（IB期、IIA期）无手术禁忌者。手术可保留卵巢功能和阴道功能，对年轻患者尤为重要。 - 手术考虑的妊娠阶段：  - 妊娠早期（孕20周前）：适合立即手术。可在终止妊娠（流产或剖宫取胎）后行根治性手术，或在胎儿在体时直接手术（但需评估风险）（[相似度: 0.555]片段："可先行治疗性流产, 再行手术治疗, 也可行胎儿在体的手术治疗"）。  - 妊娠中期和晚期（孕20周后）：适合延迟手术至孕38周左右，与剖宫产同期进行。例如，在古典式剖宫产后立即行广泛子宫切除术，以减少肿瘤扩散风险）。  - 例外：如肿瘤巨大或高危，可先行新辅助化疗再手术。 - 注意事项：手术需在专业中心进行，避免阴道分娩以防出血和扩散；妊娠期盆腔充血，术中出血风险高，操作需谨慎。 - 总结：手术治疗是可行的，优先在妊娠早期或晚期（与剖宫产结合）进行；中期可延迟但需监测。 | A | A | A |
| Chunk size=256, Overlap=100 Using SentenceSplitter | 妊娠期宫颈癌患者是否适合手术治疗？应该在妊娠哪个阶段考虑手术？  基于文档内容： - 是否适合手术治疗：是，手术治疗适用于妊娠期宫颈癌患者，尤其对于早期病例（如IA2期、IB期），可保留卵巢功能和生育能力。手术方式包括广泛子宫切除术、盆腔淋巴结切除术或广泛宫颈切除术（保留生育功能）。 - 手术阶段考虑：  - 妊娠早期（≤20周）：终止妊娠后立即手术（如广泛子宫切除）。对于IA2或IB期、肿瘤直径<2cm、无盆腔或淋巴结转移者，可行广泛宫颈切除术（保留子宫）。  - 妊娠中期（>20周）：可推迟手术至孕晚期，或在维持妊娠期间行手术（如广泛宫颈切除术），前提是经腹腔镜淋巴结活检确认无转移。  - 妊娠晚期（≥38周）：行剖宫产终止妊娠的同时或随后尽早手术（如广泛子宫切除）。 - 注意事项：手术需评估患者耐受能力、肿瘤分期和当地医疗水平。放疗后复发或晚期病例手术风险高，需谨慎。 - 依据：文档明确提到手术在妊娠期的应用（如[相似度: 0.519]、[相似度: 0.535]片段），并指定了适用阶段和条件。  # | A | A | A |
| **Question 79: 局部晚期宫颈癌患者的放疗策略是什么？何时推荐联合化疗？** | | | | |
| Chunk size=512, Overlap=0 Using TokenTextSplitter | 79. 局部晚期宫颈癌患者的放疗策略是什么？何时推荐联合化疗？ 基于文档内容： - 放疗策略：局部晚期宫颈癌（如FIGO IB3期、IIA2期及以上）以根治性放疗为主，包括体外放疗（EBRT）和腔内近距离放疗（ICRT）。标准方案为：  - EBRT：覆盖全盆腔，剂量约45-50 Gy，用于缩小肿瘤和覆盖淋巴结区域（[相似度: 0.522]片段："标准的EBRT应通过2或4个盒式技术来覆盖宫体、宫颈和附件结构、宫旁以及盆腔淋巴结"）。  - ICRT：用于提高局部剂量，A点或高危CTV剂量达80-90 Gy（等效剂量）。推荐在EBRT后进行，以优化肿瘤控制。  - 技术应用：推荐图像引导放疗（IGRT）或调强放疗（IMRT）以减少正常组织损伤，尤其当肿瘤巨大或退缩不佳时。 - 何时推荐联合化疗：  - 同步放化疗（CCRT）：推荐用于FIGO IB3期及以上（如IIB-IVA期），以顺铂为基础（每周40 mg/m²），可显著降低复发风险和死亡率（证据等级I类）。CCRT是局部晚期宫颈癌的标准治疗，比单纯放疗提高生存率10-15%。  - 具体适应证：肿瘤直径≥4 cm、淋巴结阳性、或高危因素（如腺癌、分化不良）时，必须联合同步化疗。对于资源匮乏地区，若无法放疗，可考虑新辅助化疗（NACT），但疗效有争议（[相似度: 0.522]片段）。  - 化疗方案：顺铂周疗为首选；不耐受者可用卡铂。避免单纯放疗，除非患者有化疗禁忌。 - 总结：放疗以EBRT+ICRT为核心；化疗推荐同步用于IB3期及以上，以提高疗效。 | A | A | A |
| Chunk size=256, Overlap=100 Using SentenceSplitter | 局部晚期宫颈癌患者的放疗策略是什么？何时推荐联合化疗？  基于文档内容： - 放疗策略：  - 标准方案是同期放化疗（CCRT），包括外照射放疗（EBRT）和腔内近距离放疗（如ICRT）。  - EBRT靶区覆盖盆腔±腹主动脉旁区域，剂量通常为45-50Gy。不可切除的淋巴结可加量10-15Gy。  - 近距离放疗是关键部分，使用宫腔管和阴道施源器，A点或高危CTV剂量为20-35Gy（分4-6次）。对于肿瘤巨大或不对称者，推荐组织间插植技术（需影像引导如MRI）。  - 放疗应在8周内完成，避免延长治疗时间导致失败率增加。 - 推荐联合化疗的时机：  - 对于局部晚期宫颈癌（如IB3期、IIA2期、IIB期及以上），CCRT是标准治疗，推荐同步含铂化疗（如顺铂周疗40mg/m²）。  - 当存在高危因素（如淋巴结阳性、肿瘤直径>4cm）时，必须联合化疗以降低复发风险和死亡风险。  - 化疗方案：顺铂周疗为主；不耐受者可用卡铂。不推荐放疗前新辅助化疗，除非在放疗资源匮乏地区或临床试验中。 - 依据：文档多次强调CCRT作为局部晚期宫颈癌的标准（如[相似度: 0.596]、[相似度: 0.548]、[相似度: 0.526]片段），并指定了化疗的适用情况。  # | A | B | A |
| **Question 80: 何时需要影像引导近距离放疗（ICRT），它与常规放疗有何不同？** | | | | |
| Chunk size=512, Overlap=0 Using TokenTextSplitter | 何时需要影像引导近距离放疗（ICRT），它与常规放疗有何不同？ - 何时需要ICRT：  - 肿瘤巨大或不对称：当局部肿瘤体积大且不对称时，ICRT（尤其结合MRI引导）能更精确勾画残留肿瘤，提高靶区剂量。  - 残留肿瘤或复发：推荐在近距离放疗前或放疗中行MRI检查，以优化剂量分布。  - 正常组织保护需求：当需严格限制直肠、膀胱或乙状结肠剂量时（如直肠D2cc ≤65-75 Gy），ICRT可减少并发症。  - 初治不适合手术者：所有不适合手术的初治宫颈癌，ICRT是根治性放疗的关键部分。 - 与常规放疗的不同：  - 精度和引导：ICRT使用影像（如MRI）实时引导，确保剂量精确覆盖高危CTV；常规放疗（如EBRT）依赖体外照射，精度较低，易伤及正常组织。  - 剂量和分割：ICRT处方剂量为A点或HR-CTV D90达80-85 Gy（等效剂量），分4-6次给予；常规EBRT剂量较低（约45-50 Gy），分多次进行。  - 技术和应用：ICRT可采用组织间插植技术（如宫腔管和阴道施源器）针对不规则肿瘤；常规放疗多为外部束，覆盖范围广但局部控制较弱。  - 适应症：ICRT专用于腔内或近距离治疗，适合中心性肿瘤；常规放疗用于整体盆腔照射。 - 总结：ICRT需用于复杂肿瘤或需高精度时，比常规放疗更精准、个体化，减少并发症。 | A | B | B |
| Chunk size=256, Overlap=100 Using SentenceSplitter | 何时需要影像引导近距离放疗（ICRT），它与常规放疗有何不同？  基于文档内容： - 何时需要ICRT：  - 对于不适合手术的早期宫颈癌患者（如FIGO IA期或IB1期），尤其有手术或麻醉禁忌证时，ICRT可作为替代方案。  - 当肿瘤较小（<1cm）或患者有外照射放疗（EBRT）相对禁忌证（如合并内科疾病）时，推荐单独ICRT。  - 对于局部肿瘤巨大、不对称或放疗后肿瘤退缩不足的患者，需使用组织间插植近距离放疗（需影像引导如MRI或超声），以精确靶区勾画和避免损伤正常组织（如膀胱、直肠）。 - 与常规放疗的不同：  - ICRT（腔内放疗）：是近距离放疗的一种，直接将放射源（如镭或后装设备）置于宫腔或阴道内，提供高剂量局部照射（A点剂量60-65Gy）。优势是减少对周围正常组织的损伤，保留器官功能；常用于早期或微浸润癌。  - 常规放疗（EBRT）：通过外部设备（如加速器）进行盆腔照射，覆盖范围广，但可能引起更多晚期并发症（如直肠或膀胱反应）。EBRT通常与ICRT联合用于中晚期病例。  - 关键区别：ICRT更精准、局部剂量高，需影像引导（如MRI）优化靶区；常规EBRT是广域照射，适合大范围肿瘤。文档推荐ICRT用于特定早期病例或作为EBRT的补充。 - 依据：文档详细描述了ICRT的应用场景和优势（如[相似度: 0.616]、[相似度: 0.548]片段），并对比了不同放疗方式。 | B | B | B |
| **Question 81: 宫颈癌治疗后监测复发的方法有哪些？是否推荐常规影像学检查？** | | | | |
| Chunk size=512, Overlap=0 Using TokenTextSplitter | 宫颈癌治疗后监测复发的方法有哪些？是否推荐常规影像学检查？ - 监测方法：   根据上下文，复发监测包括：   - 体格检查：每次随访行阴道顶部/宫颈细胞学检查，可早期发现中心复发（相似度0.570）。   - 病理学检查：组织学确诊是必要的，尤其放疗后患者。活检需在放疗结束后3个月进行（相似度0.570）。   - 影像学检查：   - 选择性行胸片、B超、CT、MRI等（相似度0.570）。   - 疑有转移时（如锁骨上淋巴结肿大、宫旁复发、腹主动脉旁转移），可在影像引导下行针吸活检（相似度0.570）。   - 肿瘤标志物：如SCC、CEA等，但监测价值有限（相似度0.482）。  - 常规影像学推荐：   影像学需根据症状、体征和可疑部位选择性使用（相似度0.570），非所有患者均需常规进行。 | A | A | A |
| Chunk size=256, Overlap=100 Using SentenceSplitter | 宫颈癌治疗后监测复发的方法有哪些？是否推荐常规影像学检查？  根据文档内容，宫颈癌治疗后监测复发的方法主要包括体格检查、细胞学检查和选择性影像学检查：  - 监测复发的方法：   1. 体格检查：包括全身浅表淋巴结检查、腹部触诊（以发现肿块或肝脾肿大）、盆腔检查（观察外阴、阴道、阴道穹隆、宫颈局部肿瘤情况，注意复发结节）。   2. 细胞学检查：每次随访应进行阴道顶部/宫颈细胞学检查，以发现早期中心复发（但放疗后评估较困难）。   3. 宫颈管诊刮：疑有宫颈管复发时使用。   4. 辅助检查：根据症状、体征和可疑复发部位，选择性进行胸片、B超、CT、肌酐清除率和肝功能等检查。  - 是否推荐常规影像学检查：   文档明确指出，影像学检查（如超声、CT、MRI）是“选择性”进行的，而非常规推荐。原因包括：影像学方法的应用受限于当地医疗设备和患者经济情况；常规全血或生化检查无效，但影像学主要用于特定情况（如肺部潜在病灶的监测）。因此，指南不推荐常规影像学检查，而是基于个体症状和体征选择性使用。 | A | A | A |
| **Question 82: 姑息治疗的主要目标是什么？在转移性宫颈癌患者中，如何将姑息治疗与放疗和化疗相结合？** | | | | |
| Chunk size=512, Overlap=0 Using TokenTextSplitter | 姑息治疗的主要目标是什么？在转移性宫颈癌患者中，如何将姑息治疗与放疗和化疗相结合？ - 主要目标：   姑息治疗旨在缓解症状（如疼痛、阴道流血/排液）和改善生活质量，而非治愈（相似度0.482）。  - 与放疗/化疗结合：   - 放疗：用于控制局部症状（如骨转移止痛、阴道出血），短期照射（如20Gy/4-5次）可快速缓解（相似度0.482）。   - 化疗：系统治疗可缓解全身症状，但反应率低、持续时间短（相似度0.451）。   - 综合策略：   - 转移性患者以系统治疗（化疗）为主，联合个体化放疗缓解局部症状（相似度0.451）。   - 难治性患者需结合支持治疗（营养、疼痛管理）（相似度0.451）。   上下文未提供更具体的结合流程。 | A | A | A |
| Chunk size=256, Overlap=100 Using SentenceSplitter | 姑息治疗的主要目标是什么？在转移性宫颈癌患者中，如何将姑息治疗与放疗和化疗相结合？  文档中提供了姑息治疗的相关信息：  - 姑息治疗的主要目标：控制症状以维持生命尊严和生活质量，尤其针对晚期或转移性患者。常见症状包括疼痛、输尿管阻塞、出血、阴道恶臭分泌物、淋巴水肿和瘘管。  - 在转移性宫颈癌中结合放疗和化疗：   1. 放疗的结合：短程放疗可用于缓解症状（如骨转移引起的疼痛），但需谨慎设计剂量以避免并发症。对于不适合手术的患者，放疗可作为姑息手段控制局部复发灶或减轻症状（如出血或压迫）。   2. 化疗的结合：推荐化疗（如顺铂或卡铂联合方案）用于缓解症状，尤其当患者体力状态较好（ECOG 0-2）时。化疗可暂时缓解疼痛和其他症状，但效果持续时间短，生存改善有限。化疗常与最佳支持治疗（如口服吗啡止痛）结合。   3. 综合管理：个体化方案是关键，包括社会心理支持、疼痛管理（分级使用吗啡）和临终关怀。对于盆腔外复发或转移患者，不推荐放疗或手术时，首选化疗或支持治疗；难治性患者可考虑临床试验。 | A | A | A |
| **Question 83: 对于FIGO IB3期和IIA2期的患者，为什么指南更倾向于推荐同期放化疗（CCRT）而非手术作为首选治疗？** | | | | |
| Chunk size=512, Overlap=0 Using TokenTextSplitter | 对于FIGO IB3期和IIA2期的患者，为什么指南更倾向于推荐同期放化疗（CCRT）而非手术作为首选治疗？ - 原因：   - 高辅助治疗需求：80%手术患者术后需辅助放疗或CCRT，增加"双重治疗"风险（相似度0.478）。   - 并发症风险：手术+放疗显著增加严重并发症（如肠道、泌尿道损伤），影响生活质量（相似度0.478）。   - 生存优势：CCRT相比单纯放疗提高生存率10%-15%，减少局部/远处复发（相似度0.478）。   - 资源负担：双重治疗模式增加不必要的手术和放疗资源消耗（相似度0.478）。   因此，CCRT被列为IB3/IIA2期标准治疗（相似度0.478）。 | A | A | A |
| Chunk size=256, Overlap=100 Using SentenceSplitter | 对于FIGO IB3期和IIA2期的患者，为什么指南更倾向于推荐同期放化疗（CCRT）而非手术作为首选治疗？  文档中多次强调CCRT作为IB3和IIA2期的首选治疗：  - 原因：   1. 高术后辅助治疗需求：约80%的患者在手术后需要辅助放疗（PORT）或CCRT，导致“双重治疗”（手术加放疗），这会增加并发症风险（如泌尿道损伤、瘘管、膀胱功能障碍），严重影响生活质量。   2. 资源负担：双重治疗模式增加了不必要的手术和放疗资源消耗，尤其在资源匮乏地区。   3. 生存优势：CCRT（包括外照射和腔内近距离放疗）与单独放疗相比，能提高5年生存率10%~15%，基于大型随机试验证据（如美国国家癌症中心1999年建议）。   4. 肿瘤特性：IB3/IIA2期肿瘤较大，易合并高危因素（如淋巴结阳性、宫旁浸润），增加复发风险；CCRT作为单一治疗能更有效控制局部病灶和微转移。   因此，指南推荐CCRT为标准方法，仅在放疗设备稀缺地区考虑手术替代。 | B | A | A |
| **Question 84: 对于一名FIGO分期为IB3期的患者，指南推荐的首选治疗方式是什么？为什么通常不推荐首先采用手术，然后再进行辅助放疗的“双重治疗”模式？** | | | | |
| Chunk size=512, Overlap=0 Using TokenTextSplitter | 对于一名FIGO分期为IB3期的患者，指南推荐的首选治疗方式是什么？为什么通常不推荐首先采用手术，然后再进行辅助放疗的“双重治疗”模式？ - 首选治疗：   根治性放疗（体外放疗+阴道近距离放疗）±铂类同步化疗（相似度0.534）。  - 不推荐"双重治疗"的原因：   - 并发症风险：手术后再放疗增加严重并发症（如肠道损伤、膀胱功能障碍），发生率达10%（相似度0.499）。   - 资源效率低：多数患者术后仍需放疗，双重治疗浪费医疗资源（相似度0.478）。   上下文明确强调CCRT是IB3期标准治疗，手术仅作为放疗资源匮乏地区的替代选择（相似度0.534）。 | B | B | B |
| Chunk size=256, Overlap=100 Using SentenceSplitter | 对于一名FIGO分期为IB3期的患者，指南推荐的首选治疗方式是什么？为什么通常不推荐首先采用手术，然后再进行辅助放疗的“双重治疗”模式？  首选治疗方式：指南推荐同期放化疗（CCRT）作为IB3期的首选治疗，包括外照射和腔内近距离放疗。  - 不推荐“双重治疗”模式的原因：   1. 并发症风险高：手术加术后辅助放疗会增加严重并发症，如泌尿道损伤（输尿管阴道瘘或膀胱阴道瘘发生率2%~7%）、膀胱功能障碍和感染，影响生活质量。   2. 高复发风险和资源浪费：约80%的IB3期患者术后需要辅助放疗，双重治疗模式不必要地增加了医疗资源负担，且未显著改善生存率（文档提到，术后放疗虽降低局部复发，但总生存率无统计学差异）。   3. 生存优势不足：CCRT作为单一治疗已被证明优于手术加放疗的联合模式，能提供更好的局部控制和生存率（增加10%~15%生存优势），而双重治疗可能增加远处转移风险。   文档强调，在放疗资源充足地区，应避免双重治疗以优化患者预后。 | A | A | A |
| **Question 85: LACC试验的结果对早期宫颈癌的手术方式选择产生了重要影响。该试验的核心结论是什么？对于需要保留卵巢和性功能的年轻患者，手术治疗相比放疗有哪些独特的优势？** | | | | |
| Chunk size=512, Overlap=0 Using TokenTextSplitter | LACC试验的结果对早期宫颈癌的手术方式选择产生了重要影响。该试验的核心结论是什么？对于需要保留卵巢和性功能的年轻患者，手术治疗相比放疗有哪些独特的优势？ - LACC试验核心结论：   比较开腹手术与腹腔镜/机器人手术治疗早期宫颈癌（IB1期），结果显示：   - 微创手术生存率下降，复发率高于开腹手术（相似度0.591）。   - 术中并发症无差异，但微创手术长期预后更差（相似度0.591）。  - 手术治疗的独特优势（针对年轻患者）：   - 保留卵巢功能：手术可移位卵巢至放射野外，避免放疗导致的卵巢功能丧失（相似度0.591）。   - 保留性功能：手术能维持阴道弹性和润滑，减少放疗引起的阴道萎缩（相似度0.545）。   - 准确病理分期：提供组织学依据，指导个体化后续治疗（相似度0.591）。   因此，手术仍是需保留功能的年轻患者首选（相似度0.591）。 | A | A | A |
| Chunk size=256, Overlap=100 Using SentenceSplitter | LACC试验的结果对早期宫颈癌的手术方式选择产生了重要影响。该试验的核心结论是什么？对于需要保留卵巢和性功能的年轻患者，手术治疗相比放疗有哪些独特的优势？  LACC试验的核心结论：LACC试验（Laparoscopic Approach to Cervical Cancer）比较开腹手术与微创手术（腹腔镜或机器人手术）治疗早期宫颈癌。结果显示，微创手术的生存率下降，复发率更高，而术中并发症无显著差异。结论是微创手术比开腹手术复发风险更高，需进一步研究证实。  - 手术治疗的优势（针对年轻患者需保留卵巢和性功能）：   1. 保留卵巢功能：手术能直接保留卵巢，避免放疗引起的卵巢功能丧失，从而不需激素替代治疗，这对45岁以下患者尤其重要。   2. 保留阴道功能：手术能维持阴道弹性和分泌润滑作用，避免放疗导致的阴道萎缩、缩小或干燥，改善性生活质量。   3. 个体化治疗：手术允许盆腹腔探查，提供准确病理分期，指导术后辅助治疗决策（如是否需要化疗），并去除放疗抵抗因素，降低局部复发风险。   4. 避免放疗并发症：手术可减少晚期直肠和膀胱放射反应（如疼痛性瘘管或功能障碍）。   文档指出，手术是需保留卵巢和性功能的年轻患者首选，但需注意LACC试验的警示：优先选择开腹手术而非微创方式。 | A | A | A |
| **Question 86: 在对局部晚期宫颈癌进行根治性放疗时，整个治疗过程应在多长时间内完成以获得最佳疗效？若治疗时间过长，会导致什么后果？** | | | | |
| Chunk size=512, Overlap=0 Using TokenTextSplitter | 在对局部晚期宫颈癌进行根治性放疗时，整个治疗过程应在多长时间内完成以获得最佳疗效？若治疗时间过长，会导致什么后果？  最佳治疗时间：根据上下文，根治性放疗的总治疗时间应控制在7-8周（约56天）内，以获得最佳局部控制和生存率。 - 治疗时间过长的后果：如果治疗时间超过8周，会导致肿瘤细胞再增殖风险增加，从而降低局部控制率、增加复发风险，并可能降低总体生存率。 | B | A | A |
| Chunk size=256, Overlap=100 Using SentenceSplitter | 在对局部晚期宫颈癌进行根治性放疗时，整个治疗过程应在多长时间内完成以获得最佳疗效？若治疗时间过长，会导致什么后果？  答案：根据上下文（相似度 0.508），根治性放疗（包括体外照射EBRT和近距离放疗）应在 8周内完成。若治疗时间过长（超过9~10周），会导致 更高的盆腔治疗失败率（即肿瘤控制效果下降）。 - 依据：片段中明确提到："回顾性分析显示放疗时间超过$9 \sim 10$ 周的患者与6～7周内完成放疗的患者相比具有更高的盆腔治疗失败率。因此，在规定时间内完成放疗方案尤为重要，建议8周内完成EBRT和近距离放疗。" | A | A | A |
| **Question 87: 在进行盆腔外照射（EBRT）时，指南中描述的“AP-PA照射野”（前后对穿照射野）的上下及侧方边界是如何设定的？** | | | | |
| Chunk size=512, Overlap=0 Using TokenTextSplitter | 在进行盆腔外照射（EBRT）时，指南中描述的“AP-PA照射野”（前后对穿照射野）的上下及侧方边界是如何设定的？  边界设定：根据CSCO宫颈癌诊疗指南2023，AP-PA照射野的边界设定如下：  - 上界：位于L4-L5椎体水平。  - 下界：闭孔下方2cm或肿瘤下缘3cm，以较低者为准（即取两者中更保守的值，确保覆盖肿瘤同时保护正常组织）。  - 侧界：位于真骨盆骨性边界外侧1.5-2cm（即从骨盆侧壁向外扩展1.5-2cm，以覆盖潜在扩散区域） - 该设定旨在充分覆盖原发肿瘤和区域淋巴结，同时最小化正常组织损伤。 | A | B | A |
| Chunk size=256, Overlap=100 Using SentenceSplitter | 在进行盆腔外照射（EBRT）时，指南中描述的“AP-PA照射野”（前后对穿照射野）的上下及侧方边界是如何设定的？  答案：在知识库中未找到关于"AP-PA照射野"具体边界设定的描述。文档中提到了照射范围（如"照射范围应包括最易复发部位"和"当盆腔高位髂总及主动脉淋巴结转移时，可将放射野向上扩展至$\mathrm{T}_{12}$水平"），但未明确说明前后对穿照射野的上下及侧方边界细节。 - 依据：上下文（如相似度 0.575、0.508）仅泛述照射靶区（如盆腔±腹主动脉旁），未提供AP-PA野的边界参数。 | D | D | D |
| **Question 88: 指南中指出，根治性子宫切除术后哪些病理因素属于“高危因素”？对于具有这些高危因素的患者，应采取何种辅助治疗？** | | | | |
| Chunk size=512, Overlap=0 Using TokenTextSplitter | 指南中指出，根治性子宫切除术后哪些病理因素属于“高危因素”？对于具有这些高危因素的患者，应采取何种辅助治疗？  答案:   - 高危因素: 根治性子宫切除术后，以下病理因素属于高危因素：淋巴结阳性、切缘阳性、宫旁浸润。具备任何一个高危因素均需进一步评估。  - 辅助治疗: 对于具有这些高危因素的患者，推荐采取 盆腔体外放疗加含铂同期化疗（同步放化疗），可能加阴道近距离放疗。文档强调，如无腹主动脉旁淋巴结或其他远处转移，需补充此方案（证据等级I）。同步化疗通常使用顺铂单药（如顺铂40 mg/m²每周），不耐受时可替换为卡铂。 | B | B | B |
| Chunk size=256, Overlap=100 Using SentenceSplitter | 指南中指出，根治性子宫切除术后哪些病理因素属于“高危因素”？对于具有这些高危因素的患者，应采取何种辅助治疗？  答案：   - 高危因素：包括 手术切缘阳性、淋巴结转移或宫旁扩散。   - 辅助治疗：应接受 术后放疗（PORT），并可联合同步化疗（如5-FU、DDP）。  - 依据：上下文（相似度 0.539）明确说明："高危因素包括手术切缘阳性、淋巴结转移或者宫旁扩散，应接受PORT，GOG109显示出了总体生存优势。" 另一片段（相似度 0.522）补充："对宫颈癌I～Ⅱ期病人根治术后有盆腔转移、宫旁浸润和切缘阳性者实施同步放化疗。" | A | A | A |
| **Question 89: 对于一名40岁、无手术禁忌证的早期宫颈癌（如IB1期）患者，为什么在手术和根治性放疗疗效相当的情况下，临床上通常会优先推荐手术治疗？** | | | | |
| Chunk size=512, Overlap=0 Using TokenTextSplitter | 对于一名40岁、无手术禁忌证的早期宫颈癌（如IB1期）患者，为什么在手术和根治性放疗疗效相当的情况下，临床上通常会优先推荐手术治疗？  优先推荐手术治疗的原因：对于年轻（如40岁）、无手术禁忌证的IB1期患者，手术优先推荐的原因包括：  - 保留卵巢功能：手术可避免放疗导致的卵巢早衰，从而维持内分泌功能和生育潜力。  - 减少长期并发症：手术相比放疗可降低阴道狭窄、膀胱或直肠损伤等长期副作用风险，改善生活质量。  - 个体化治疗：手术允许病理分期更准确，便于后续个体化辅助治疗决策（如淋巴结状态评估）。 - 尽管手术和放疗的生存率相似，但手术在年轻患者中提供更好的功能保留和生活质量）。 | A | B | B |
| Chunk size=256, Overlap=100 Using SentenceSplitter | 对于一名40岁、无手术禁忌证的早期宫颈癌（如IB1期）患者，为什么在手术和根治性放疗疗效相当的情况下，临床上通常会优先推荐手术治疗？  答案：优先推荐手术的主要原因是 保留卵巢功能和阴道功能，避免放疗导致的长期并发症（如卵巢功能丧失、阴道萎缩或狭窄），这对年轻患者（<45岁）尤为重要。此外，手术可避免放射抵抗问题，并允许术中探查以调整治疗方案。 - 依据：   - 上下文（相似度 0.600）指出："（1）能保留卵巢功能，而不需采用激素替代治疗。能保留更具功能的阴道，其弹性和分泌润滑作用常常得以保持，避免阴道缩小和萎缩。这对45岁以下的病人尤其重要。"   - 另一片段（相似度 0.525）强调："凡属IB期及ⅡA期的病人，若有如下情况，应首先考虑手术根治：①45岁以下的病人。"   - 相似度 0.514 补充："由于放疗可能导致相关并发症，对于未绝经患者，特别是年龄小于45岁且无手术禁忌证的患者可选择手术治疗。" | C | A | A |
| **Question 90: 宫颈癌手术中，盆腔淋巴结切除术的标准切除范围具体包括哪些区域的淋巴结？** | | | | |
| Chunk size=512, Overlap=0 Using TokenTextSplitter | 宫颈癌手术中，盆腔淋巴结切除术的标准切除范围具体包括哪些区域的淋巴结？  标准切除范围：盆腔淋巴结切除术的标准范围包括以下淋巴结区域：  - 髂总淋巴结（common iliac nodes）。  - 髂外淋巴结（external iliac nodes）。  - 髂内淋巴结（internal iliac nodes）。  - 闭孔淋巴结（obturator nodes）。  - 骶前淋巴结（presacral nodes，根据肿瘤位置选择性切除）。 - 该范围旨在系统性清除盆腔淋巴结，以准确分期和降低转移风险。 | C | C | C |
| Chunk size=256, Overlap=100 Using SentenceSplitter | 宫颈癌手术中，盆腔淋巴结切除术的标准切除范围具体包括哪些区域的淋巴结？  在文档中，有明确信息：盆腔淋巴结切除术的标准切除范围包括髂总淋巴结、髂外淋巴结、髂内淋巴结以及闭孔淋巴结。部分描述还提到可能包括宫旁淋巴结（来源：[相似度: 0.522] 和 [相似度: 0.472]）。  # | B | C | C |
| **Question 91: 对于IA期宫颈癌的诊断，为什么不能仅凭宫颈活检组织病理来确诊？** | | | | |
| Chunk size=512, Overlap=0 Using TokenTextSplitter | 对于IA期宫颈癌的诊断，为什么不能仅凭宫颈活检组织病理来确诊？  在提供的文档中，明确指出IA期宫颈癌的诊断不能仅凭宫颈活检组织病理来确诊。原因在于宫颈活检可能无法准确评估浸润深度，而IA期涉及微小浸润癌（如IA1和IA2期），需要更全面的组织样本以确认浸润范围。具体依据来自文档片段（相似度: 0.571）：  > "b IA期需经宫颈锥切组织的病理方能确诊，不能单纯由宫颈活检组织病理来确诊。"  此外，文档强调宫颈活检可能遗漏深层浸润或微小病灶，导致分期错误。因此，确诊IA期必须通过宫颈锥切术获取完整组织进行病理检查，以确保准确评估浸润深度和范围。 | A | A | A |
| Chunk size=256, Overlap=100 Using SentenceSplitter | 对于IA期宫颈癌的诊断，为什么不能仅凭宫颈活检组织病理来确诊？  根据文档内容，IA期宫颈癌的诊断不能仅凭宫颈活检组织病理来确诊，因为活检可能无法全面评估肿瘤的浸润深度和范围。文档明确指出（在相似度0.599的片段中）：“b IA期需经宫颈锥切组织的病理方能确诊，不能单纯由宫颈活检组织病理来确诊。” 这是因为宫颈活检通常只取小部分组织，可能遗漏深层浸润或微小病灶，而宫颈锥切术能提供更完整的组织样本，确保准确分期（如FIGO 2018分期标准）。这有助于避免误诊或低估病情，从而影响治疗决策。  # | A | A | A |
| **Question 92: 根据Q-M分型表，A型子宫切除术和B1型子宫切除术在对输尿管的处理上有何不同？** | | | | |
| Chunk size=512, Overlap=0 Using TokenTextSplitter | 根据Q-M分型表，A型子宫切除术和B1型子宫切除术在对输尿管的处理上有何不同？  基于文档中的Q-M分型表（见于相似度: 0.550和0.467片段），A型和B1型子宫切除术在输尿管处理上的关键区别如下：  - A型子宫切除术：输尿管被识别并进行游离。但手术范围较保守，适用于IA1期宫颈癌，不涉及输尿管的深度解剖。  - B1型子宫切除术：输尿管需从输尿管隧道中打开并进行侧推（即分离输尿管隧道）。手术范围更广，适用于IA1期伴淋巴血管间隙浸润（LVSI+）和IA2期宫颈癌，需部分游离输尿管以减少并发症风险。 | B | C | C |
| Chunk size=256, Overlap=100 Using SentenceSplitter | 根据Q-M分型表，A型子宫切除术和B1型子宫切除术在对输尿管的处理上有何不同？  根据文档中的Q-M分型表（在相似度0.592的片段中），A型和B1型子宫切除术在输尿管处理上的关键区别如下： - A型子宫切除术：输尿管处理为“识别但不游离”。这意味着手术中仅识别输尿管的位置，但不进行解剖分离或游离，以减少损伤风险。这适用于低风险病例（如IA期宫颈癌）。 - B1型子宫切除术：输尿管处理为“隧道”顶部打开与侧推”。这涉及打开输尿管隧道（输尿管进入膀胱的通道）并进行侧向推移，以更广泛地暴露和切除宫旁组织。这适用于中等风险病例（如IA2期或伴淋巴脉管间隙浸润）。 这种差异反映了手术范围的扩大：A型更保守，B1型更激进，旨在降低复发风险但增加手术复杂性。  # | C | B | A |
| **Question 93: 根据Q-M手术分型，C1型（保留神经的根治性子宫切除术）和C2型（经典的宫颈癌根治术）在处理侧方宫旁组织和保留神经方面有何关键区别？** | | | | |
| Chunk size=512, Overlap=0 Using TokenTextSplitter | 根据Q-M手术分型，C1型（保留神经的根治性子宫切除术）和C2型（经典的宫颈癌根治术）在处理侧方宫旁组织和保留神经方面有何关键区别？  - C1型（保留神经的根治性子宫切除术）：在处理侧方宫旁组织时，仅切除子宫深静脉水平以内的组织，避免损伤盆腔内脏神经（如下腹下神经丛），通过精细解剖保留神经功能，减少术后膀胱和直肠功能障碍。  - C2型（经典的根治性子宫切除术）：广泛切除侧方宫旁组织，包括切除至髂内静脉水平，不保留神经结构（如完全切断宫旁神经丛），导致较高的神经损伤风险。  关键区别在于C1型通过限制切除范围和针对性神经保留技术（如识别和保护神经束）来减少并发症，而C2型进行更广泛的宫旁组织切除且不保留神经。 | B | B | B |
| Chunk size=256, Overlap=100 Using SentenceSplitter | 根据Q-M手术分型，C1型（保留神经的根治性子宫切除术）和C2型（经典的宫颈癌根治术）在处理侧方宫旁组织和保留神经方面有何关键区别？  在知识库中未找到答案。文档多次提到Q-M分型（如C型对应Piver-Rutledge III型），并描述了C型手术的一般范围（如切除宫旁组织、主韧带等），但没有具体区分C1型（保留神经）和C2型（经典）在处理侧方宫旁组织或保留神经方面的细节。文档片段（如相似度0.515、0.483）仅概述C型手术的整体切除范围（如输尿管分离、主韧带切断），未提供C1和C2亚型的对比信息。因此，无法基于文档回答此问题。 | D | D | D |
| **Question 94: 宫颈癌保留生育功能手术的I级推荐适应证包括哪些病理类型？** | | | | |
| Chunk size=512, Overlap=0 Using TokenTextSplitter | 宫颈癌保留生育功能手术的I级推荐适应证包括哪些病理类型？  保留生育功能手术（如根治性宫颈切除术）的I级推荐（强推荐）适应证仅限于：  - 鳞状细胞癌和腺癌（包括普通型腺癌）。  其他病理类型（如小细胞癌、透明细胞癌或腺鳞癌）通常不被推荐，因证据不足或预后较差。I级推荐的具体条件包括：IA1期无淋巴脉管间隙浸润（LVSI）、IA2期或IB1期（肿瘤直径≤2 cm），且患者有强烈生育意。依据来自文档片段（相似度: 0.477） | C | C | C |
| Chunk size=256, Overlap=100 Using SentenceSplitter | 宫颈癌保留生育功能手术的I级推荐适应证包括哪些病理类型？  在知识库中未找到答案。文档讨论了保留生育功能手术的适应证（如相似度0.603片段提到“对于符合条件，有保留生育功能要求的患者采用保留生育功能的手术方式”，以及相似度0.483片段描述手术选项如宫颈切除术），但没有明确列出I级推荐的具体病理类型（如鳞癌、腺癌等）。文档片段（如相似度0.549）提到宫颈腺癌的处理，但未指定为I级推荐或限定病理类型。因此，文档中缺乏此信息。  # | D | D | D |
| **Question 95: 中晚期宫颈癌的放疗在进行体外放射治疗（EBRT）时，如果遇到不可切除的淋巴结，推荐采用何种技术进行加量放疗，推荐的加量剂量是多少？** | | | | |
| Chunk size=512, Overlap=0 Using TokenTextSplitter | 中晚期宫颈癌的放疗在进行体外放射治疗（EBRT）时，如果遇到不可切除的淋巴结，推荐采用何种技术进行加量放疗，推荐的加量剂量是多少？  依据CSCO宫颈癌诊疗指南2023和《FIGO 2018妇癌报告》解读，对于中晚期宫颈癌（如IIB-IVA期）的EBRT中不可切除的淋巴结：  - 推荐技术：采用调强放疗（IMRT）或立体定向体部放疗（SBRT）进行加量，以精确靶向淋巴结并减少周围正常组织损伤。  - 推荐加量剂量：在EBRT基础剂量（通常45-50 Gy）上，加量9-15 Gy（总剂量达54-65 Gy），具体剂量根据淋巴结大小和位置调整，常用分次方案为每次1.8-2.0 Gy。 | B | B | B |
| Chunk size=256, Overlap=100 Using SentenceSplitter | 中晚期宫颈癌的放疗在进行体外放射治疗（EBRT）时，如果遇到不可切除的淋巴结，推荐采用何种技术进行加量放疗，推荐的加量剂量是多少？  根据文档内容，对于中晚期宫颈癌的EBRT，当遇到不可切除的淋巴结时，推荐使用高度适形的放疗技术进行加量放疗，推荐的加量剂量为10~15 Gy。具体信息来自相似度0.490的片段：“不可切除的淋巴结可以通过高度适形的放疗技术，给予同步加量或后程推量10~15Gy。” 这包括技术如调强放疗（IMRT）或立体定向放疗（SBRT），以精准靶向淋巴结区域，同时最小化对周围正常组织的损伤。文档强调，这适用于图像引导的EBRT，需结合临床评估（如淋巴结大小和位置）。 | B | B | B |
| **Question 96: 在对中晚期宫颈癌进行根治性放疗时，近距离放疗（后装治疗）是关键部分。指南推荐的A点或高危临床靶区（HR-CTV）的等效生物剂量（EQD2）目标是多少？为了保护周围正常器官，对直肠和膀胱的照射剂量有何限制？** | | | | |
| Chunk size=512, Overlap=0 Using TokenTextSplitter | 在对中晚期宫颈癌进行根治性放疗时，近距离放疗（后装治疗）是关键部分。指南推荐的A点或高危临床靶区（HR-CTV）的等效生物剂量（EQD2）目标是多少？为了保护周围正常器官，对直肠和膀胱的照射剂量有何限制？  回答：  根据上下文信息（相似度0.645片段），A点或高危CTV（HR-CTV）的D90等效生物剂量（EQD2）目标为80~85 Gy；对于肿瘤体积大或退缩不佳的病灶，EQD2需≥87 Gy。正常器官的剂量限制如下：  - 直肠：D2cc ≤ 65~75 Gy  - 膀胱：D2cc ≤ 80~90 Gy（注：文档中为 $D _ { 2 \mathrm { e } }$，但结合上下文，应指D2cc剂量限制）  这些限制旨在最小化正常组织损伤，如果无法达到参数要求，应考虑使用组织间插植技术作为补充。 | A | A | A |
| Chunk size=256, Overlap=100 Using SentenceSplitter | 在对中晚期宫颈癌进行根治性放疗时，近距离放疗（后装治疗）是关键部分。指南推荐的A点或高危临床靶区（HR-CTV）的等效生物剂量（EQD2）目标是多少？为了保护周围正常器官，对直肠和膀胱的照射剂量有何限制？  回答：   根据文档内容：   A点或HR-CTV的等效生物剂量（EQD2）目标：** 在知识库中未找到答案。文档中提到了A点或HR-CTV的处方剂量（例如，总量20~35Gy，分割为5~7Gy × 4-6次），但没有明确说明等效生物剂量（EQD2）的目标值。EQD2是用于比较不同放疗方案的生物等效剂量，文档中未涉及此概念的具体数值。 | D | D | D |
| **Question 97: 对于需要接受同步放化疗的中晚期宫颈癌患者，指南推荐的标准周疗化疗方案是什么（包括药物名称和剂量）？如果患者无法耐受此方案，备选方案是什么？** | | | | |
| Chunk size=512, Overlap=0 Using TokenTextSplitter | 对于需要接受同步放化疗的中晚期宫颈癌患者，指南推荐的标准周疗化疗方案是什么（包括药物名称和剂量）？如果患者无法耐受此方案，备选方案是什么？  回答：  根据上下文信息（相似度0.645片段），同步放化疗的标准周疗方案为：  - 药物名称：顺铂（DDP）  - 剂量：40 mg/m²，每周一次，共4~6次。  此方案通常在盆腔体外放疗（EBRT）期间进行。 | B | B | B |
| Chunk size=256, Overlap=100 Using SentenceSplitter | 对于需要接受同步放化疗的中晚期宫颈癌患者，指南推荐的标准周疗化疗方案是什么（包括药物名称和剂量）？如果患者无法耐受此方案，备选方案是什么？  标准周疗化疗方案： 基于文档内容，推荐方案为顺铂（DDP）周疗：  - 药物名称：顺铂（DDP）。  - 剂量：$40 \, \mathrm{mg/m}^2$（每平方米体表面积40毫克）。  - 频率：每周一次，共4~6次。  - 来源：文档片段（相似度: 0.539）明确提到：“g同步化疗方案推荐：顺铂周疗（ $\mathrm{DDP} \, 40 \, \mathrm{mg/m}^2$ ，每周一次，4~6次）”。  - 如果患者无法耐受顺铂的备选方案：   - 推荐使用卡铂（Carboplatin）或含铂双药方案：  - 卡铂：AUC=2（剂量基于曲线下面积计算），每周一次，共4~6次。  - 或含铂双药增敏化疗（具体药物未详细说明，但文档提到“含铂双药”）。  - 来源：同一文档片段（相似度: 0.539）指出：“如果不能耐受顺铂者，选择卡铂（AUC=2，每周一次，4~6次）或含铂双药增敏化疗。” | A | A | A |
| **Question 98: 根据“Sedlis标准”，判断一名病理类型为鳞癌的患者，若其肿瘤大小为3cm，存在淋巴脉管间隙浸润（LVSI），且浸润深度达到宫颈间质的中1/3，是否满足中危因素的标准？** | | | | |
| Chunk size=512, Overlap=0 Using TokenTextSplitter | 根据“Sedlis标准”，判断一名病理类型为鳞癌的患者，若其肿瘤大小为3cm，存在淋巴脉管间隙浸润（LVSI），且浸润深度达到宫颈间质的中1/3，是否满足中危因素的标准？  回答：  根据上下文信息（相似度0.566和0.542片段），Sedlis标准用于定义鳞癌患者的中危因素。标准内容为：  - LVSI阳性 + 外1/3间质浸润：任何大小肿瘤  - LVSI阳性 + 中1/3间质浸润：肿瘤大小≥2 cm  - LVSI阳性 + 内1/3间质浸润：肿瘤大小≥5 cm  - LVSI阴性 + 中或外1/3间质浸润：肿瘤大小≥4 cm  患者情况：肿瘤大小3 cm（≥2 cm）、LVSI阳性、浸润深度中1/3。这符合“LVSI阳性 + 中1/3间质浸润：肿瘤大小≥2 cm”的条件，因此满足中危因素的标准。 | B | A | A |
| Chunk size=256, Overlap=100 Using SentenceSplitter | 根据“Sedlis标准”，判断一名病理类型为鳞癌的患者，若其肿瘤大小为3cm，存在淋巴脉管间隙浸润（LVSI），且浸润深度达到宫颈间质的中1/3，是否满足中危因素的标准？  判断结果： 是，满足中危因素的标准。 - 依据：   - 文档中引用了Sedlis标准来定义中危因素，具体针对鳞癌患者。  - 根据文档片段（相似度: 0.545）：“b病理类型为鳞癌的患者中危因素（肿瘤大小、间质浸润、淋巴脉管间隙浸润）可参考‘Sedlis标准’[1]（表91）。” 表9-1的内容包括：  - “淋巴脉管间隙浸润（LVSI）阳性 中1/3间质浸润： 肿瘤大小≥2cm”  - 患者情况：  - 肿瘤大小：3cm（≥2cm，满足条件）。  - LVSI：阳性（满足条件）。  - 浸润深度：中1/3（满足条件）。  - 因此，符合Sedlis标准中“LVSI阳性 + 中1/3间质浸润 + 肿瘤大小≥2cm”的组合，被定义为中危因素。 | A | A | A |
| **Question 99: 对于接受了根治性手术的早期宫颈癌患者，哪些术后病理结果被定义为“高危因素”，从而需要进行辅助治疗？** | | | | |
| Chunk size=512, Overlap=0 Using TokenTextSplitter | 对于接受了根治性手术的早期宫颈癌患者，哪些术后病理结果被定义为“高危因素”，从而需要进行辅助治疗？  回答：  根据上下文信息（相似度0.566片段），早期宫颈癌根治术后辅助治疗的“高危因素”定义为：  - 淋巴结阳性  - 切缘阳性  - 宫旁浸润  具备任何一个高危因素，均推荐进一步影像学检查（如无远处转移），并补充盆腔体外放疗 + 含铂同期化疗 ± 阴道近距离放疗（证据等级I）。 | A | A | A |
| Chunk size=256, Overlap=100 Using SentenceSplitter | 对于接受了根治性手术的早期宫颈癌患者，哪些术后病理结果被定义为“高危因素”，从而需要进行辅助治疗？  高危因素的定义： 基于文档内容，术后病理高危因素包括：  - 淋巴结阳性（即盆腔淋巴结转移）。  - 切缘阳性（即手术切除边缘有癌细胞残留）。  - 宫旁浸润（即癌瘤侵犯宫旁组织）。 - 依据：   - 文档片段（相似度: 0.545）明确提到：“‘高危因素’包括淋巴结阳性、切缘阳性和宫旁浸润。具备任何一个‘高危因素’均推荐进一步影像学检查，以了解其他部位转移情况，如无腹主动脉旁淋巴结和其他部位转移，需补充盆腔体外放疗＋含铂同期化疗（证据等级I）±阴道近距离放疗。”  - 另一片段（相似度: 0.481）也支持：“高危因素包括手术切缘阳性、淋巴结转移或者宫旁扩散”。  - 这些因素触发辅助治疗（如放疗或放化疗），以降低复发风险。 | A | A | A |
| **Question 100: 序贯放化疗方案显示出什么优势？该方案被建议在何种特定条件下使用？** | | | | |
| Chunk size=512, Overlap=0 Using TokenTextSplitter | 序贯放化疗方案显示出什么优势？该方案被建议在何种特定条件下使用？  回答：  根据上下文信息（相似度0.542片段），序贯放化疗方案的优势为：  - 较高的3年无病生存率（DFS）  - 能降低死亡风险  该方案被建议在特定条件下使用：放疗资源紧张的地区（如设备或技术不足时），可作为替代方案。研究（STARS研究）显示，序贯放化疗组在IB1~IIA2期根治术后存在病理高危因素的患者中，DFS率优于单纯放疗组和同步放化疗组，且不良反应发生率相似。 | A | A | A |
| Chunk size=256, Overlap=100 Using SentenceSplitter | 序贯放化疗方案显示出什么优势？该方案被建议在何种特定条件下使用？  序贯放化疗方案的优势：   - 基于文档内容，序贯放化疗（即先化疗后放疗或交替进行，而非同步）显示出较高的3年无病生存（DFS）率和降低死亡风险的优势。  - 来源：文档片段（相似度: 0.500）提到：“e我国一项Ⅲ期研究—STARS研究，将 $\mathrm{IB1 \sim IIA2}$ 期宫颈癌根治术后存在病理高危因素的患者随机分为3组：单纯放射治疗组、同步放化疗组和序贯放化疗组。结果显示前两组3~4级不良反应发生率相似，而序贯放化疗组有较高的3年无病生存（disease-free survival，DFS）率并能降低死亡风险”。  - 建议使用的特定条件：   - 该方案被建议在放疗资源紧张的地区使用。  - 来源：同一文档片段（相似度: 0.500）指出：“可用于放疗资源紧张的地区[6-7]”。这表示在医疗资源有限、无法常规实施同步放化疗时，序贯放化疗可作为替代方案，以优化资源利用同时维持疗效。 | A | A | A |
| **Question 101: Mackenrodt韧带是由哪两个部分组成的连接体？** | | | | |
| Chunk size=512, Overlap=0 Using TokenTextSplitter | Mackenrodt韧带是由哪两个部分组成的连接体？  根据文档内容（相似度0.492片段），Mackenrodt韧带被描述为颈横韧带（transverse cervical ligament）与短纤维束（short fibrous bundle）在坐骨棘高度呈L字结合而形成的构造体。具体来说： - 颈横韧带是主韧带的一部分，位于坐骨大孔中央位置，起始于弓状线高度（约第5腰椎高度），止于与坐骨棘结合的区域。 - 短纤维束是肛提肌筋膜或骨盆隔膜上部筋膜的一部分，相当于阴道旁结缔组织的一部分。 因此，Mackenrodt韧带是由颈横韧带和短纤维束组成的连接体。 | A | B | A |
| Chunk size=256, Overlap=100 Using SentenceSplitter | Mackenrodt韧带是由哪两个部分组成的连接体？  根据文档内容，Mackenrodt韧带是由颈横韧带和水平结缔组织基底束（或称为短纤维束）组成的连接体。具体来说： - 文档指出：“Mackenrodt韧带指的是颈横韧带和水平结缔组织基底束的复合体。”（来源：[相似度: 0.436]片段） - 另一处提到：“笔者主张，Mackenrodt韧带应当是颈横韧带的前筋膜（形成膀胱侧腔表面的筋膜）与短纤维束形成连接体。”（来源：[相似度: 0.436]片段） 因此，Mackenrodt韧带是由颈横韧带和水平结缔组织基底束（或短纤维束）组成的连接体。 | A | A | A |
| **Question 102: Latzko手术中如何分离主韧带？** | | | | |
| Chunk size=512, Overlap=0 Using TokenTextSplitter | Latzko手术中如何分离主韧带？  根据文档内容（相似度0.562和0.483片段），Latzko手术中分离主韧带的过程涉及以下步骤： - 首先，展开膀胱侧腔（paravesical space）和直肠侧腔（pararectal space）直至肛提肌水平。这通过挖掘腔隙来实现，例如在膀胱侧腔底部切开肛提肌上筋膜的一部分，暴露直肠侧腔的尾室。 - 然后，在骨盆侧方韧带（即主韧带）的底部打通一个隧道，使之与直肠侧腔尾方室贯通。这通常使用钳子（如直钳）钳夹主韧带的脏侧端并向内侧牵拉，以保持张力。 - 最后，将主韧带全体作为切除对象，用钳子钳夹后切断和结扎。文档强调，主韧带在Latzko手术中被视为一个整体结缔组织束，切除时需注意避免损伤周围结构如盆腔内脏神经。 综上，分离主韧带的方法是：通过展开膀胱侧腔和直肠侧腔至肛提肌水平，用钳子钳夹暴露出的主韧带，然后切除。 | A | A | A |
| Chunk size=256, Overlap=100 Using SentenceSplitter | Latzko手术中如何分离主韧带？  在Latzko手术中，分离主韧带涉及展开膀胱侧腔和直肠侧腔，并用直钳钳夹分离出的主韧带进行切除。具体步骤如下： - 首先，展开膀胱侧腔和直肠侧腔至肛提肌水平。这包括切开肛提肌上筋膜的一部分，暴露直肠侧腔的尾室（caudal chamber）。（来源：[相似度: 0.548]片段：“挖掘膀胱侧腔，然后切开肛提肌上筋膜的一部分，暴露直肠侧腔的尾室”） - 接着，在骨盆侧方韧带（即主韧带）的底部打通一个隧道，使之与直肠侧腔尾方室贯通。用钳子钳夹主韧带的脏侧端并向内侧牵拉。（来源：[相似度: 0.548]片段） - 最后，用直钳钳夹分离出的主韧带全体，并将其作为切除对象。（来源：[相似度: 0.548]片段：“在Latzko手术中，该韧带全体皆作为切除对象”） 总之，分离过程依赖于腔隙的展开和钳夹技术，确保主韧带被完全暴露和切除。 | A | A | A |
| **Question 103: 根据Otcenasek的理论，宫骶韧带可以分为哪三个部分？** | | | | |
| Chunk size=512, Overlap=0 Using TokenTextSplitter | 根据Otcenasek的理论，宫骶韧带可以分为哪三个部分？  根据文档内容（相似度0.562片段），Otcenasek等（2008年论文）将宫骶韧带细分为三个小部分： - 血管部（vascular part）：指颈横韧带的一部分，涉及血管结构。 - 神经部（neural part）：包括下腹神经和骨盆内脏神经。 - 原生宫骶韧带（true uterosacral ligament）：指原始的纤维结缔组织部分。 文档明确指出，这种划分基于宫骶韧带在腹背方向的分层，其中血管部和神经部实际是颈横韧带的组成部分，而原生宫骶韧带是独立的结构。因此，宫骶韧带可分为血管部、神经部和原生宫骶韧带三个部分。 | A | A | A |
| Chunk size=256, Overlap=100 Using SentenceSplitter | 根据Otcenasek的理论，宫骶韧带可以分为哪三个部分？  根据Otcenasek的理论（基于2008年发表的论文），宫骶韧带可以分为以下三个部分： - 血管部（vascular part）：指颈横韧带的一部分，涉及血管结构。 - 神经部（neural part）：包括下腹神经和骨盆内脏神经。 - 原生宫骶韧带（true uterosacral ligament）：指纤维结缔组织部分。 文档明确说明：“Otcenasek等（ObstetGynecol，2008）所发表的论文中，记述了‘隔的宫骶部分又细分为3个小部分——血管部、神经部和原生宫骶韧带’。”（来源：[相似度: 0.567]片段）。另一处补充：“宫骶韧带 ≡ 颈横韧带（血管部） + 下腹神经、骨盆内脏神经（神经部） + 原生宫骶韧带。”（来源：[相似度: 0.567]片段）。因此，这三个部分是基于腹背方向的细分。 | A | A | A |
| **Question 104: Latzko直肠侧腔头端室的形成方法是什么？** | | | | |
| Chunk size=512, Overlap=0 Using TokenTextSplitter | Latzko直肠侧腔头端室的形成方法是什么？  根据文档内容（相似度0.483和0.437片段），Latzko直肠侧腔头端室（cranial chamber of the pararectal space）的形成方法如下： - 颈横韧带后筋膜是髂内动静脉血管鞘的延长部分，覆盖在韧带后面作为脏侧筋膜。 - 通过将髂内动静脉血管鞘和颈横韧带后筋膜从各自本体（即血管和韧带结构）上剥离下来，形成一个人工腔隙。 - 这个剥离过程暴露了髂内动静脉、子宫动脉、子宫深静脉等结构，并创建出Latzko直肠侧腔（头端室）。文档提到，此腔隙由裸露的血管、韧带后方的脏侧支和剥离下的筋膜围成，深部可露出盆腔内脏神经和尾骨肌筋膜。 因此，形成方法是：剥离颈横韧带后筋膜和髂内血管鞘从本体上，从而创建出腔隙。 | A | A | A |
| Chunk size=256, Overlap=100 Using SentenceSplitter | Latzko直肠侧腔头端室的形成方法是什么？  Latzko直肠侧腔头端室的形成方法是通过剥离前结缔组织基束（frontal connective tissue ground bundle）后面的腹膜来展开。具体过程包括： - 剥离前结缔组织基束后面的腹膜，从而展开直肠侧腔头端室（upper portion or cranial chamber of pararectal space）。（来源：[相似度: 0.531]片段：“打开直肠侧腔头端室：剥离前结缔组织基束后面的腹膜，展开直肠侧腔头端室”） - 这一操作有助于暴露颈横韧带的起始部，并在手术中用于处理主韧带等结构。（来源：[相似度: 0.434]片段：“探查Latzko直肠侧腔头端室的腔隙，即可露出颈横韧带的起始部”） 因此，形成依赖于对特定结缔组织束的腹膜剥离，以创建头端室腔隙。 | A | A | A |
| **Question 105: 在盆腔悬吊系统中，具有纵向筋膜性质的韧带有哪些？这些韧带连接哪些结构?** | | | | |
| Chunk size=512, Overlap=0 Using TokenTextSplitter | 在盆腔悬吊系统中，具有纵向筋膜性质的韧带有哪些？这些韧带连接哪些结构？  根据文档内容（相似度: 0.462），盆腔悬吊系统（suspensory system）由纵向韧带群组成，这些韧带具有纵向筋膜性质，用于从耻骨向骶骨方向连接脏器节点。具体韧带及其连接结构如下（基于表14）：  - 耻骨膀胱/尿道韧带（pubovesical/urethral ligament）：连接耻骨和膀胱筋膜。  - 膀胱子宫/阴道韧带（vesicouterine/vaginal ligament）：连接膀胱筋膜和子宫颈/阴道筋膜。  - 宫骶韧带和直肠子宫韧带（uterosacral ligament and rectouterine ligament）：连接子宫颈/阴道筋膜和直肠筋膜。  - 直肠尾骨韧带（rectococcygeal ligament）：连接直肠筋膜和骶骨。  文档指出，这些韧带共同维持脏器的纵向悬吊功能，与支撑系统（横向韧带群）协同工作。因此，具有纵向筋膜性质的韧带包括：耻骨膀胱/尿道韧带、膀胱子宫/阴道韧带、宫骶韧带、直肠子宫韧带和直肠尾骨韧带，它们连接的结构如上所述。 | A | A | A |
| Chunk size=256, Overlap=100 Using SentenceSplitter | 在盆腔悬吊系统中，具有纵向筋膜性质的韧带有哪些？这些韧带连接哪些结构?  在盆腔悬吊系统（suspensory system）中，具有纵向筋膜性质的韧带包括耻骨膀胱/尿道韧带、膀胱子宫韧带、宫骶韧带、直肠子宫韧带和直肠尾骨韧带。这些韧带从耻骨向骶骨方向纵向连接多个盆腔结构： - 耻骨膀胱/尿道韧带（pubovesical/urethral ligament）：连接耻骨到膀胱和尿道，固定膀胱和尿道的位置。（来源：[相似度: 0.467]片段：“耻骨尿道/膀胱韧带沿着尿道内口到膀胱尖，将膀胱和尿道固定到耻骨上”） - 膀胱子宫韧带（vesicouterine ligament）：连接膀胱到子宫颈/阴道，协助固定膀胱与子宫。（来源：[相似度: 0.467]片段：悬吊系统包括“膀胱子宫韧带”） - 宫骶韧带（uterosacral ligament）：连接子宫颈/阴道到骶骨，提供子宫的纵向支撑。（来源：[相似度: 0.467]片段：悬吊系统包括“宫骶韧带”） - 直肠子宫韧带（rectouterine ligament） 和 直肠阴道韧带（rectovaginal ligament）：连接直肠到子宫或阴道，协助固定直肠位置。（来源：[相似度: 0.467]片段：悬吊系统包括“直肠子宫/阴道韧带”） - 直肠尾骨韧带（rectococcygeal ligament）：连接直肠到尾骨，提供直肠的尾端固定。（来源：[相似度: 0.467]片段：悬吊系统包括“直肠尾骨韧带”） 这些韧带整体形成纵向连接，从耻骨向骶骨方向串连膀胱、子宫颈/阴道和直肠，以维持盆腔脏器的位置和功能。（来源：[相似度: 0.467]片段：“悬吊系统将脏器从耻骨向骶骨方向纵向连接了几个节点”，以及[相似度: 0.441]片段：“悬吊系统将膀胱、子宫颈/阴道以及直肠的各自固有筋膜或外膜联系到耻骨和骶骨上”）。 | A | B | A |
| **Question 106: 广泛子宫切除术中如何辨识颈横韧带与直肠侧韧带？** | | | | |
| Chunk size=512, Overlap=0 Using TokenTextSplitter | 广泛子宫切除术中如何辨识颈横韧带与直肠侧韧带？  在广泛全子宫切除术中，辨识颈横韧带与直肠侧韧带主要通过手术中发掘特定腔隙来实现。根据文档内容： - 颈横韧带（也称为主韧带的一部分）和直肠侧韧带在解剖上被视为复合体（主韧带 = 颈横韧带 + 直肠侧韧带）。辨识时，需通过发掘膀胱侧间隙和直肠侧腔来暴露这些结构。 - 具体辨识方法：  - 发掘Latzko直肠侧腔：通过剥离髂内血管鞘和颈横韧带后筋膜，形成直肠侧腔头端室。颈横韧带位于此腔隙的前方，其起始部可从髂内血管分支处（如子宫动脉分支部）辨识（参考文档中“[相似度: 0.691]”和“[相似度: 0.584]”部分）。  - 辨识直肠侧韧带：直肠侧韧带位于颈横韧带的后方，与直肠相连。在发掘直肠侧腔时，可通过分离宫骶韧带和直肠阴道间隙来暴露。直肠侧韧带通常在盆腔底部（骶骨面附近）可见，并与盆腔神经丛相关（参考文档中“[相似度: 0.635]”和“[相似度: 0.584]”部分）。 - 关键点：颈横韧带血管丰富（含子宫动脉和子宫深静脉），而直肠侧韧带更偏向神经和结缔组织。手术中，避免整体钳夹（Massenligature），而是分离筋膜和血管部以清晰辨识两者边界。 | B | B | B |
| Chunk size=256, Overlap=100 Using SentenceSplitter | 广泛子宫切除术中如何辨识颈横韧带与直肠侧韧带？  在广泛全子宫切除术中，辨识颈横韧带与直肠侧韧带的关键是通过手术中发掘特定腔隙来暴露这些结构。文档指出，主韧带是颈横韧带和直肠侧韧带的复合体（主韧带 = 颈横韧带 + 直肠侧韧带）。辨识方法包括： - 发掘腔隙：通过打开膀胱侧间隙和直肠侧腔（包括头端室和尾室），可以暴露颈横韧带和直肠侧韧带。颈横韧带位于子宫颈旁，是主韧带的头侧部分；直肠侧韧带位于直肠旁，是主韧带的尾侧部分。 - 解剖标志：颈横韧带与子宫动脉和子宫深静脉相关，在分离过程中可见其起始于盆腔侧壁；直肠侧韧带则与直肠中动静脉和盆腔神经丛相连，在发掘直肠侧腔时可见其附着于直肠侧壁。 - 手术技巧：在Latzko手术中，通过打通膀胱侧间隙和直肠侧腔尾室来辨识；在冈林手术中，通过发掘阴道侧间隙和直肠侧腔来区分两者。文档强调，辨识时需注意避免损伤骶前静脉丛和臀下阴部内血管。  文档来源：多个片段提到主韧带的定义和辨识方法，例如“主韧带（笔者注释：主韧带 = 颈横韧带 + 直肠侧韧带）”和“在广泛全子宫切除术中发掘Latzko直肠侧腔的深度，按照Latzko及冈林手术中那样完全暴露直到骶骨面是没有必要的，深度达到比子宫深静脉稍微深一些水平就可以了”。 | B | A | A |
| **Question 107: 请简述盆腔自主神经走行。** | | | | |
| Chunk size=512, Overlap=0 Using TokenTextSplitter | 请简述盆腔自主神经走行  盆腔自主神经的走行在文档中有详细描述，主要包括腹下神经、盆腔内脏神经、盆腔神经丛及其分支： - 腹下神经：沿盆腔侧壁下降，位于输尿管和髂内血管的外侧，走向直肠侧方。 - 盆腔内脏神经：源自骶神经根（S2-S4），从骶骨孔穿出后，向腹侧走行，进入盆腔底部。在直肠侧韧带附近与腹下神经汇合。 - 盆腔神经丛：由腹下神经和盆腔内脏神经在直肠侧韧带区域形成。此神经丛位于颈横韧带和直肠侧韧带的深部。 - 分支走行：从盆腔神经丛分出膀胱支和直肠支：  - 膀胱支：沿膀胱子宫韧带后层（特别是膀胱宫颈韧带）走行，与膀胱上静脉并行，最终进入膀胱。  - 直肠支：沿直肠阴道韧带分布，进入直肠。 - 整体走行是三维的：神经从盆腔侧壁向内脏器官辐射，手术中需在发掘腔隙（如直肠侧腔和阴道侧间隙）时注意保护（参考文档中“[相似度: 0.635]”、“[相似度: 0.584]”和“[相似度: 0.515]”部分）。 | A | A | A |
| Chunk size=256, Overlap=100 Using SentenceSplitter | 请简述盆腔自主神经走行  盆腔自主神经的走行涉及从骶骨发出，沿盆腔侧壁分布，最终分支到膀胱和直肠等器官。文档描述如下： - 起源和路径：盆腔自主神经主要包括盆腔内脏神经（源自骶骨神经根），形成盆腔神经丛（位于直肠侧韧带区域）。神经丛沿子宫深静脉和颈横韧带走行，分支为膀胱神经支和直肠神经支。 - 关键关系：神经走行与血管束（如膀胱上静脉）并行，特别是在膀胱子宫韧带后层区域。例如，膀胱神经支与膀胱上静脉共同走行于膀胱子宫韧带深层。 - 手术中的可见性：在发掘直肠侧腔和阴道侧间隙时，神经可被暴露。文档提到，盆腔神经丛位于直肠侧韧带中，膀胱神经支则分布在膀胱子宫韧带后层附近。  文档来源：片段如“盆腔自主神经的走行”和“盆丛发出的膀胱神经支”，以及“在追踪这条静脉的时候，发现它和膀胱神经在韧带中有共同的走行路径”。 | B | B | B |
| **Question 108: 在广泛全子宫切除术中，保留哪些神经分支有助于保护膀胱功能** | | | | |
| Chunk size=512, Overlap=0 Using TokenTextSplitter | 在广泛全子宫切除术中，保留哪些神经分支有助于保护膀胱功能?  在广泛全子宫切除术中，保留特定神经分支可减少术后膀胱功能障碍（如尿潴留）。基于文档： - 关键神经分支：保留盆腔神经丛及其膀胱支（膀胱神经支）有助于保护膀胱功能。膀胱支在膀胱子宫韧带后层中走行，与膀胱上静脉并行。 - 保留方法：手术中应避免切断膀胱子宫韧带后层的神经部，而仅处理血管部。具体来说：  - 分离膀胱子宫韧带后层时，识别并保留其中的膀胱神经支。  - 避免整体切除主韧带或直肠侧韧带，以减少对盆腔神经丛的损伤。 - 文档强调：保留这些神经分支可改善术后尿意恢复和减少残余尿（参考文档中“[相似度: 0.635]”部分：“保留盆腔神经丛及其膀胱支...在安全性和脏器功能的保留上使日本的广泛全子宫切除术荣升为世界未有的高度”和“[相似度: 0.584]”部分：“保留了盆腔内脏神经和盆丛及它的膀胱支的一部分，术后不仅恢复了尿意，而且基本没有残余尿了”）。 | B | B | B |
| Chunk size=256, Overlap=100 Using SentenceSplitter | 在广泛全子宫切除术中，保留哪些神经分支有助于保护膀胱功能？  在广泛全子宫切除术中，保留盆腔神经丛及其膀胱支有助于保护膀胱功能。文档明确指出： - 关键神经分支：保留盆腔神经丛（位于直肠侧韧带区域）和由其发出的膀胱神经支（分布到膀胱）。这些神经分支控制膀胱的收缩和感觉功能。 - 保留方法：在手术中，通过避免整体钳夹颈横韧带和直肠侧韧带，并分离血管部与神经部（例如，只切断血管而保留神经），可以实现神经保留。具体策略包括在膀胱子宫韧带后层处理时，只切断血管部分（如膀胱上静脉），而保留并行的神经束。 - 效果：文档提到，保留这些神经分支可减少术后膀胱麻痹和残余尿问题，例如“保留盆腔神经丛及其膀胱支”和“保留膀胱神经支”是设计保留神经手术的重点。  文档来源：多个片段讨论保留神经手术，如“设计盆腔自主神经保留手术的重点放在解剖学上，也就是说，任务是保留盆腔神经丛及其膀胱支”和“保留范围以术后不对患者造成膀胱功能损害和日常生活不便为准”。 | B | B | B |
| **Question 109: Latzko和冈林手术有何不同？请简述二者差别** | | | | |
| Chunk size=512, Overlap=0 Using TokenTextSplitter | Latzko和冈林手术有何不同？请简述二者差别  Latzko手术和冈林手术是广泛全子宫切除术的两种主要术式，文档中详细比较了它们的差异。主要差别总结如下： - 想法基础不同：  - Latzko手术：基于二维解剖概念，将盆腔结缔组织视为平面结构，操作集中在延伸单纯子宫切除术的韧带切除（参考文档中“[相似度: 0.545]”部分）。  - 冈林手术：基于三维概念，强调立体分离腔隙和韧带，将膀胱子宫韧带分为前、后层独立处理（参考文档中“[相似度: 0.545]”和“[相似度: 0.530]”部分）。 - 直肠侧腔发掘方法不同：  - Latzko手术：分头端室和尾室发掘。头端室通过剥离颈横韧带后筋膜形成，尾室通过切开肛提肌上筋膜形成。两者联通后切除主韧带（参考文档中“[相似度: 0.545]”表格）。  - 冈林手术：在输尿管和腹下神经内侧发掘单一直肠侧腔，重点在宫骶韧带内侧操作，不明确区分头尾室（参考文档中“[相似度: 0.545]”部分）。 - 膀胱子宫韧带处理不同：  - Latzko手术：未明确分层，视为颈横韧带和膀胱的连接带，整体处理（参考文档中“[相似度: 0.545]”部分）。  - 冈林手术：明确分为前层（相当于输尿管隧道顶）和后层（联系颈横韧带和膀胱的血管神经束），分别切断（参考文档中“[相似度: 0.635]”和“[相似度: 0.545]”部分）。 - 主韧带切除方法不同：  - Latzko手术：沿颈横韧带后面发掘直肠侧腔头端室，整体钳夹切除主韧带，范围延伸到坐骨大孔（参考文档中“[相似度: 0.530]”表格）。  - 冈林手术：在膀胱侧间隙和直肠侧腔之间分离主韧带，切除范围以髂骨窝为中心，避免过度深入骨盆底（参考文档中“[相似度: 0.530]”部分）。 - 其他差别：包括阴道旁结缔组织处理（Latzko整体切除肛提肌上筋膜，冈林仅切除阴道周围结缔组织）和手术顺序（Latzko先处理前支撑带，冈林先处理后支撑带）（参考文档中“[相似度: 0.545]”和“[相似度: 0.530]”部分）。 | A | A | A |
| Chunk size=256, Overlap=100 Using SentenceSplitter | Latzko和冈林手术有何不同？请简述二者差别  Latzko手术和冈林手术是广泛全子宫切除术的两种主要术式，文档详细比较了它们的差别，主要基于手术理念、腔隙发掘和韧带处理： - 核心理念：  - Latzko手术：是二维的，基于欧洲传统解剖学，将手术视为在平面上的延伸（例如，简单地将单纯子宫切除术的切除范围向盆腔侧壁移动）。它强调发掘膀胱侧间隙和直肠侧腔头端室。  - 冈林手术：是三维的，将欧洲概念升华，强调立体结构（例如，分膀胱子宫韧带前、后层）。它发掘阴道侧间隙、膀胱侧间隙和直肠侧腔，并明确各韧带的立体关系。 - 腔隙发掘：  - Latzko手术：主要打开膀胱侧间隙和直肠侧腔头端室，通过联通头尾两室来分离主韧带。  - 冈林手术：发掘阴道侧间隙、膀胱侧间隙和直肠侧腔，使这些腔隙自然相连，便于分韧带处理。 - 韧带处理：  - Latzko手术：整体钳夹并切断主韧带（包括颈横韧带），切除范围延伸到坐骨大孔。  - 冈林手术：将膀胱子宫韧带分为前层和后层分别切断，并独立处理颈横韧带，切除范围以髂骨窝为中心，底边到肛提肌上筋膜。 - 其他差异：冈林手术更注重保留神经的可能性（尽管最初未意识到），而Latzko手术更简单但易遗留问题如盆腔侧壁断端矛盾。  文档来源：专门表格和描述，如“Latzko手术：二维的...发掘出膀胱侧间隙和直肠侧腔头端室/尾室...；冈林手术：三维的...发掘出阴道侧间隙和膀胱侧间隙时，分出膀胱子宫韧带前、后层”。 | B | B | B |
| **Question 110: 冈林手术如何分离和切断膀胱子宫韧带？** | | | | |
| Chunk size=512, Overlap=0 Using TokenTextSplitter | 冈林手术如何分离和切断膀胱子宫韧带？  在冈林手术中，膀胱子宫韧带的分离和切断是关键步骤，文档描述如下： - 分离方法：  - 首先，发掘阴道侧间隙和膀胱侧间隙，以暴露膀胱子宫韧带。  - 将韧带明确分为前层和后层：前层联系子宫颈和膀胱（相当于输尿管隧道顶），后层联系颈横韧带和膀胱（包含血管和神经）。  - 分离时，用器械（如剪刀或电刀）在疏松结缔组织层进行，避免损伤输尿管和神经。具体操作包括：剥离膀胱腹膜后，横向切开膀胱子宫陷凹，将膀胱从子宫颈筋膜分离，显露出韧带结构（参考文档中“[相似度: 0.635]”和“[相似度: 0.515]”部分）。 - 切断方法：  - 前层切断：在输尿管上方识别前层，用钳夹或电凝离断，处理时注意保护输尿管。  - 后层切断：后层（也称为膀胱阴道韧带）包含膀胱上静脉和膀胱神经支。冈林术中，后层需仔细分离，仅切断血管部（如膀胱上静脉），而保留神经部（膀胱神经支）。这通过钝性分离和选择性钳夹实现（参考文档中“[相似度: 0.635]”部分：“冈林将膀胱子宫韧带分成前层、后层...后层也称为膀胱阴道韧带”和“[相似度: 0.584]”部分关于保留神经的描述）。 - 整体过程强调三维解剖，确保在腔隙间系统操作，以减少出血和神经损伤（参考文档中“[相似度: 0.515]”部分）。 | B | C | C |
| Chunk size=256, Overlap=100 Using SentenceSplitter | 冈林手术如何分离和切断膀胱子宫韧带？  在冈林手术中，膀胱子宫韧带的分离和切断是通过发掘阴道侧间隙并分前、后层进行的，具体步骤如下： - 分离方法：  - 首先，发掘阴道侧间隙（位于膀胱阴道间隙和直肠阴道间隙之间），用拉钩向腹侧牵拉以暴露韧带。  - 将膀胱子宫韧带分为前层（联系子宫颈和膀胱，相当于输尿管隧道顶）和后层（也称为膀胱阴道韧带，联系颈横韧带和膀胱，包含神经血管束）。 - 切断过程：  - 前层：用器械（如Cooper剪刀）分离前层，钳夹后切断并结扎。前层处理相对简单，常涉及输尿管隧道的暴露。  - 后层：在阴道侧间隙中扩大，游离后层残端（包含膀胱上静脉和神经），用双钳钳夹，中间切断并结扎。文档强调，后层处理需精细以避免出血，并可能保留神经部分（如只切断血管部）。 - 关键点：此过程是冈林手术的独特之处，欧美术式无类似观点。文档提到，后层处理可能为保留膀胱神经提供可能性，但操作中常因静脉破裂而复杂。  文档来源：片段如“冈林将膀胱子宫韧带分为前层和后层来分别切断”和“技法是将膀胱阴道间隙和阴道侧间隙各自用拉钩向腹侧牵拉，把紧张的膀胱阴道韧带用LigaSure离断”。  # | C | A | C |
| **Question 111: 在Latzko和冈林手术中，膀胱子宫韧带的前层和后层在解剖定义上有何关键区别？** | | | | |
| Chunk size=512, Overlap=0 Using TokenTextSplitter | 在Latzko和冈林手术中，膀胱子宫韧带的前层和后层在解剖定义上有何关键区别？  根据文档内容（相似度: 0.541），在表15的比较中，Latzko手术和冈林手术在膀胱子宫韧带的定义上存在关键区别： - Latzko手术：基于欧洲传统解剖学，膀胱子宫韧带主要被视为颈横韧带与膀胱的连接带，但手术中未具体展现分层结构。它通常指代输尿管隧道顶（ureteric roof），没有明确区分前层和后层。例如，文档提到“包含Latzko在内的欧美的膀胱子宫韧带指的是Wertheim手术的输尿管隧道顶，并没有与冈林的膀胱子宫韧带后层相对应的设想”。 - 冈林手术：冈林明确将膀胱子宫韧带分为前层和后层。前层联系子宫颈和膀胱，相当于输尿管隧道顶；后层称为膀胱阴道韧带，联系颈横韧带和膀胱。文档指出“冈林将膀胱子宫韧带分成前层、后层。前层是联系子宫颈和膀胱的韧带，相当于欧美的输尿管隧道顶。后层也称为膀胱阴道韧带，仔细看《子宫颈癌根治术》图26、图27，应该是指联系颈横韧带和膀胱的韧带”。  关键区别总结：Latzko手术未分层，膀胱子宫韧带主要等同于输尿管隧道顶；冈林手术明确分层，前层为输尿管隧道顶，后层为膀胱阴道韧带，这体现了冈林术式的三维解剖概念。 | A | A | A |
| Chunk size=256, Overlap=100 Using SentenceSplitter | 在Latzko和冈林手术中，膀胱子宫韧带的前层和后层在解剖定义上有何关键区别？  基于文档内容，Latzko手术和冈林手术在膀胱子宫韧带的前层和后层的处理上存在关键区别，主要体现在解剖定义和手术方法上： - Latzko手术：文档中未明确将膀胱子宫韧带细分为前层和后层。Latzko手术采用二维方法，整体处理盆腔结缔组织，没有专门区分前层和后层。手术中，膀胱子宫韧带被视为一个连续结构，通常通过联合结扎（Massenligatur）方式整体切断，重点在于发掘膀胱侧间隙和直肠侧腔（头端室和尾室），但未对韧带进行分层解剖（参考表15和文档片段："Latzko手术是二维的...在单纯子宫全切术的基础上将主韧带切断的部位向盆腔侧壁方向延伸一些"）。 - 冈林手术：冈林手术采用三维方法，明确将膀胱子宫韧带分为前层（anterior leaf）和后层（posterior leaf），并分别切断。前层定义为输尿管隧道顶（roof of ureteric canal），涉及输尿管上方的结构；后层定义为涉及静脉丛和结缔组织的部分，与神经保留相关。冈林通过发掘阴道侧间隙来分离和切断这些层次，这为保留膀胱神经提供了可能性（  # | B | B | B |
| **Question 112: 请简述Wertheim手术的具体流程。** | | | | |
| Chunk size=512, Overlap=0 Using TokenTextSplitter | 请简述Wertheim手术的具体流程  根据文档内容（相似度: 0.500），Wertheim手术的具体流程如下（基于描述整理）： 1. 切断圆韧带和骨盆漏斗韧带：手术开始时，切断这些韧带以进入盆腔。 2. 切开子宫阔韧带：打开阔韧带前后叶。 3. 剥离膀胱和游离输尿管后部：分离膀胱并游离输尿管下部。 4. 游离子宫动脉和子宫浅静脉：将食指插入输尿管隧道，向上提输尿管隧道顶（roof of the ureteral canal），游离颈横韧带上缘组织中的子宫动脉和子宫浅静脉（图71和图74）。 5. 切开输尿管隧道顶并游离输尿管：切开隧道顶，游离输尿管中部和前部（中部及上部）。 6. 钳夹和切断宫骶韧带：使用第1把钳子钳夹并切断宫骶韧带。 7. 钳夹和切断直肠子宫/阴道韧带：使用第2把钳子钳夹并切断此韧带。 8. 钳夹和切断水平结缔组织基束和阴道静脉丛：使用第3把钳子处理这些结构。 9. 切断并缝合阴道：离断阴道并进行缝合。 10. 关腹：完成手术。  文档强调，Wertheim手术未使用膀胱侧间隙和直肠侧腔的概念，且颈横韧带切断仅到子宫动脉水平，宫骶韧带在靠近骶骨处切断（相似度: 0.500）。此流程基于1912年文献和Peham-Amreich手术书的描述。 | B | A | A |
| Chunk size=256, Overlap=100 Using SentenceSplitter | 请简述Wertheim手术的具体流程  基于文档内容，Wertheim手术是宫颈癌手术的近代术式基础，其具体流程如下（文档提供了详细步骤）： 1. 开腹和初步暴露：纵向开腹，切断圆韧带和骨盆漏斗韧带，切开子宫阔韧带前后叶，剥离膀胱并游离输尿管后部（下部）。此时，尚未引入膀胱侧间隙和直肠侧腔的概念。 2. 处理输尿管和血管：将食指插入输尿管隧道，向上提拉输尿管隧道顶（Mackenrodt韧带上层），游离子宫动脉和子宫浅静脉（文档指出："子宫静脉实际指的应该是子宫浅静脉"）。然后，切开输尿管隧道顶，游离输尿管中部和前部。 3. 切断宫骶韧带：钳夹和切断宫骶韧带（第1把钳子），重点在于靠近骶骨处操作。 4. 处理其他韧带：切离宫韧带（主韧带）和直肠子宫韧带，剥离膀胱，并形成和打开输尿管隧道。 5. 阴道和周围组织处理：发掘阴道侧间隙，切离膀胱子宫韧带前层（输尿管隧道顶），露出前部输尿管。然后，露出膀胱上静脉，确认其汇入子宫深静脉的位置，并在汇入点上游分离、切断子宫深静脉的子宫支。 6. 切断阴道：切离直肠阴道韧带和阴道周围组织，最后切断阴道并缝合。 7. 关腹：放置引流管，缝合盆腔腹膜，关腹。 - 文档强调，Wertheim手术的根治程度较小，颈横韧带只切到子宫动脉水平，而宫骶韧带在靠近骶骨处切断（参考片段："Wertheim手术中，把宫骶韧带的切断作为重点"、"颈横韧带切断处却只切到子宫动脉、输尿管的高度而已"）。  # | C | C | C |
| **Question 113: 三林的超广泛全子宫切除术中，髂内血管的三个结扎点具体涉及哪些血管？** | | | | |
| Chunk size=512, Overlap=0 Using TokenTextSplitter | 三林的超广泛全子宫切除术中，髂内血管的三个结扎点具体涉及哪些血管？  根据文档内容（相似度: 0.615 和 相似度: 0.500），三林术式（超广泛全子宫切除术）涉及三个结扎点，具体血管如下： 1. 第1结扎（闭孔动静脉）：结扎并切断闭孔动静脉（闭孔血管）。 2. 第2结扎（髂内动静脉干）：在臀上动静脉分支后，对下游的髂内动静脉干进行结扎和切断。 3. 第3结扎（臀下阴部内共同管）：在梨状肌下口处，臀下阴部内共同管（臀下阴部内动静脉）分出分支之前进行结扎和切断。  文档明确指出，三林术式旨在摘除髂内血管系统，包括脏侧支（如子宫动脉）、前壁侧支（如闭孔动静脉）和后壁侧支（如臀上下动静脉），但第3结扎点处理臀下阴部内共同管时，未考虑其分支到膀胱和直肠的血管（相似度: 0.615）。 | A | B | A |
| Chunk size=256, Overlap=100 Using SentenceSplitter | 三林的超广泛全子宫切除术中，髂内血管的三个结扎点具体涉及哪些血管？  基于文档内容，三林的超广泛全子宫切除术涉及髂内血管的三个结扎点，具体血管如下： 1. 第1结扎点：闭孔动静脉（obturator artery and vein）。文档明确提到："结扎、切断闭孔动静脉（第1结扎）"。 2. 第2结扎点：臀下血管分支后的髂内动静脉干（common trunk of internal iliac artery and vein after branching of inferior gluteal vessels）。文档描述："结扎、切断臀下血管分支后的髂内动静脉干（第2结扎）"。 3. 第3结扎点：臀下阴部内共同管分支处的上游处（upstream of the branching point of the inferior gluteal and internal pudendal common trunk）。文档指出："结扎、切断梨状肌下口处臀下阴部内共同管分支处的上游处（第3结扎）"。 - 文档还提到，三林术式未充分考虑膀胱和直肠的血管分支（如直肠中静脉），这可能导致问题（参考片段："三林术式中...完全没有考虑臀下阴部内共同管处分支/合流的膀胱、直肠血管"）。  # | A | A | A |
| **Question 114: Meigs手术采取了什么措施以保证解剖准确性和避免直肠中静脉损伤？** | | | | |
| Chunk size=512, Overlap=0 Using TokenTextSplitter | Meigs手术采取了什么措施以保证解剖准确性和避免直肠中静脉损伤？  根据文档内容（相似度: 0.615），Meigs手术采取了以下措施： - 避免在骶骨面附近切断主韧带底部：Meigs认为直肠中静脉在靠近骶骨面处出现的可能性很高，因此不能在主韧带底部（骶骨面附近）进行切断，以防止损伤直肠中静脉。 - 注重解剖准确性：Meigs手术在切除颈横韧带时，范围与子宫深静脉水平相似（类似于小林保留神经手术），强调精确操作而非盲目扩大切除范围。文档提到“Meigs和小林的保留神经手术中的颈横韧带的切除范围是相似的”，并指出在效果优先的时代背景下，Meigs手术避免了Latzko及冈林手术中可能存在的过度切除问题。  这些措施保证了手术的解剖准确性，减少了并发症风险，如直肠中静脉损伤导致的出血。 | B | A | A |
| Chunk size=256, Overlap=100 Using SentenceSplitter | Meigs手术采取了什么措施以保证解剖准确性和避免直肠中静脉损伤？  基于文档内容，Meigs手术通过以下措施保证解剖准确性和避免直肠中静脉损伤： - 避免在特定区域切断主韧带：Meigs认为，不能在靠近骶骨面处切断主韧带底部，因为直肠中静脉在此出现的可能性很高。他通过限制主韧带的切除深度来防止损伤该静脉（文档片段："他认为不能在靠近骶骨面处切断主韧带底部，因为直肠中静脉在此出现的可能性很高"）。 - 强调解剖准确性：Meigs手术注重精确分离血管，避免联合结扎（Massenligatur），而是逐根分离和结扎血管，以提高安全性。文档指出，Meigs手术在解剖上更准确，与Latzko及冈林手术相比，虽根治性略逊，但减少了意外出血风险（参考片段："Meigs手术在解剖上的准确性"、"后人将Meigs术式与Latzko及冈林术式相比较认为其在根治性上略逊一筹，笔者却更关注Meigs手术在解剖上的准确性"）。 - 此外，Meigs手术包括输尿管侧方支持组织的完整解剖，保留远端输尿管的血液供应以减少瘘管风险（文档片段："输尿管从膀胱宫颈韧带中完整地解剖出来...以保留远端输尿管的若干血液供应"）。  # | A | A | A |
| **Question 115: 广泛全子宫切除术中，直肠侧腔头端室的解剖特点是什么？** | | | | |
| Chunk size=512, Overlap=0 Using TokenTextSplitter | 广泛全子宫切除术中，直肠侧腔头端室的解剖特点是什么？  根据文档内容（相似度: 0.541 和 相似度: 0.434），直肠侧腔头端室主要在Latzko手术中被描述，其解剖特点如下： - 形成方式：直肠侧腔头端室是通过剥离颈横韧带后筋膜及髂内血管鞘（血管鞘从髂内血管本体上剥离）形成的腔隙。文档在表15中定义为“颈横韧带后筋膜及髂内血管鞘从各自本体上剥离下来之后形成的腔隙（Latzko直肠侧腔）”。 - 位置和功能：位于直肠侧韧带附近，用于暴露颈横韧带起始部，便于手术操作。它属于Latzko手术中发掘的直肠侧腔的一部分，头端室与尾室（在肛提肌上筋膜处形成）共同构成直肠侧腔。 - 风险：在发掘过程中，有损伤深部血管（如臀下阴部内共同管、膀胱下静脉或直肠中静脉）的高风险，因为该区域血管丰富（相似度: 0.434提到“损伤深部的臀下阴部内共同管或膀胱下静脉或直肠中静脉的危险性很高”）。 - 与冈林手术的区别：冈林手术的直肠侧腔发掘方法不同，冈林直肠侧腔在输尿管和腹下神经内侧打开，而Latzko直肠侧腔头端室在它们外侧打开（表15）。  此解剖特点强调了在手术中谨慎操作的必要性，以避免出血并发症。 | B | B | B |
| Chunk size=256, Overlap=100 Using SentenceSplitter | 广泛全子宫切除术中，直肠侧腔头端室的解剖特点是什么？  基于文档内容，直肠侧腔头端室（upper portion or cranial chamber of pararectal space）的解剖特点因手术术式而异，主要描述在Latzko手术和冈林手术中： - 在Latzko手术中：  - 直肠侧腔头端室是通过剥离颈横韧带后筋膜及髂内血管鞘形成的腔隙。  - 解剖特点：它是一个人工发掘的间隙，位于颈横韧带后方和髂内血管前方，用于暴露和切除颈横韧带起始部。文档描述："直肠侧腔头端室：颈横韧带后筋膜及髂内血管鞘从各自本体上剥离下来之后形成的腔隙（Latzko直肠侧腔）"。  - 风险：发掘时容易损伤深部血管（如臀下阴部内共同管、膀胱下静脉或直肠中静脉），导致出血（参考片段："Latzko直肠侧腔...损伤深部的臀下阴部内共同管或膀胱下静脉或直肠中静脉的危险性很高"）。 - 在冈林手术中：  - 直肠侧腔头端室是从宫骶韧带内侧断端的直下方开始，向骨盆底方向离断疏松结缔组织形成的。  - 解剖特点：它位于直肠筋膜和骨前筋膜（presacral fascia）之间，发掘时可能绕到直肠背侧，有损伤骶前静脉丛的风险。文档指出："冈林的直肠侧腔是在宫骶韧带内侧断端的直下方开始...向骨盆底方向逐渐离断疏松结缔组织发掘而来的"。 - 一般特点：直肠侧腔头端室是人工侧腔（非自然解剖结构），用于手术中暴露和分离盆腔结缔组织。发掘深度需谨慎控制，以避免意外（如过深发掘可能导致骶前静脉丛损伤）。文档强调，该腔隙的发掘是为了支持颈横韧带的切除（参考片段："直肠侧腔的发掘只需要进行到可以切除颈横韧带即可"）。  所有回答均基于提供的文档片段。如果某个细节未在文档中明确覆盖，我已确保回答不超出上下文范围。 | B | B | B |
| **Question 116: 在保留神经的广泛全子宫切除术中，颈横韧带的切断应遵循哪些原则以避免整体钳夹？** | | | | |
| Chunk size=512, Overlap=0 Using TokenTextSplitter | 在保留神经的广泛全子宫切除术中，颈横韧带的切断应遵循哪些原则以避免整体钳夹？  根据文档上下文（相似度: 0.455），颈横韧带的切断应遵循以下原则以避免整体钳夹（Massenligature）：  - 分离筋膜和脉管部：首先切断颈横韧带的筋膜部分（即疏松结缔组织），然后逐根分离并切断脉管部（血管）。  - 避免整体钳夹：不能整体钳夹切断，而是将血管一根一根地分离和切断，以减少对神经的损伤。  - 使用合适器械：根据部位选用超声刀（Ultrasonic Surgical Aspirator）进行精细操作，振动输出功率控制在30%~50%，吸引压力为200mmHg，冲洗流量为30~50mL/min。  - 解剖学意识：在手术中意识到筋膜是人为视为束状的疏松结缔组织（areolar connective tissue），需轻柔处理以保护深部的自主神经（如盆腔内脏神经）。  这些原则旨在确保手术安全、减少损伤，并保留膀胱和直肠功能。 | B | B | B |
| Chunk size=256, Overlap=100 Using SentenceSplitter | 在保留神经的广泛全子宫切除术中，颈横韧带的切断应遵循哪些原则以避免整体钳夹？  根据文档上下文（相似度: 0.456），颈横韧带的切断应遵循以下原则以避免整体钳夹（Massenligature）：  - 避免整体钳夹切断，而是将颈横韧带分离为筋膜部和脉管部。  - 首先切断筋膜部，然后将脉管部的血管一根一根地分离并切断。  - 根据手术部位选用适当的工具，如超声刀（图77），以精细操作减少损伤。  - 操作中需意识到筋膜是疏松结缔组织（areolar connective tissue），应视为束状结构进行分离，而非整体处理。  这些原则旨在保护盆腔自主神经（如盆丛和膀胱神经支），减少术后膀胱功能损害。 | B | B | B |
| **Question 117: 请简述保留神经广泛全子宫切除术的手术流程。** | | | | |
| Chunk size=512, Overlap=0 Using TokenTextSplitter | 请简述保留神经广泛全子宫切除术的手术流程。  根据文档上下文（相似度: 0.455 和 0.401），保留神经广泛全子宫切除术的手术流程简述如下：  1. 开腹和固定子宫：开腹后固定子宫位置。  2. 离断子宫圆韧带：切断圆韧带以进入盆腔。  3. 切开和剥离髂窝腹膜：暴露腹膜后间隙。  4. 开放膀胱侧间隙：发掘膀胱侧间隙，但无需深入骨盆底。  5. 盆腔淋巴结清扫：按顺序清扫淋巴结（包括髂外、腹股沟、闭孔、髂内淋巴结），使用超声刀辅助，注意保留神经。  6. 开放Latzko直肠侧腔：发掘直肠侧腔至子宫深静脉高度。  7. 切开膀胱腹膜：进入膀胱区域。  8. 分离并切断子宫动脉：彻底清扫子宫动脉周围，保留输尿管支。  9. 开放冈林直肠侧腔：分离后部输尿管，形成尿管板。  10. 处理颈横韧带：分离筋膜后逐根切断血管，避免整体钳夹（参考问题116）。  11. 后方操作：分离宫骶韧带及直肠子宫韧带。  12. 前方操作：剥离膀胱、发掘阴道侧腔、离断膀胱子宫韧带。  13. 切除子宫和阴道：在保留神经的前提下切除子宫及相关组织。  14. 关闭和重建：缝合阴道残端，关闭腹膜，预防粘连。  整个流程强调在6个腔隙（如膀胱侧间隙、直肠侧腔）中独立切断各韧带，以保留盆腔神经丛及其膀胱支。 | B | B | B |
| Chunk size=256, Overlap=100 Using SentenceSplitter | 请简述保留神经广泛全子宫切除术的手术流程。  基于文档上下文（相似度: 0.416, 0.442, 0.456, 0.403），保留神经广泛全子宫切除术的手术流程简述如下：  1. 开腹和固定子宫：从耻骨联合上方沿中线切开腹壁，放置牵开器排压肠管，观察腹腔内情况（如癌症进展度、输尿管走行）。  2. 离断子宫圆韧带：切断并结扎子宫圆韧带。  3. 切开和剥离髂窝腹膜：暴露盆腔侧壁结构。  4. 开放膀胱侧间隙：发掘间隙，但无需深入至肛提肌上筋膜。  5. 尝试发掘卵巢前窝：探索卵巢前窝区域。  6. 盆腔淋巴结清扫：   - 清扫顺序包括剥离髂外动脉鞘、清扫浅部髂外淋巴结、腹股沟淋巴结、剥离髂外静脉鞘、清扫深部髂外淋巴结、闭孔淋巴结、髂内淋巴结、颈横韧带淋巴结等（相似度: 0.434）。   - 使用超声刀辅助清扫，避免血管损伤（相似度: 0.423）。  7. 开放Latzko直肠侧腔：发掘至子宫深静脉高度。  8. 处理颈横韧带：分离韧带筋膜，逐一切断血管（避免整体钳夹），保留神经支（相似度: 0.456）。  9. 后方操作：包括展开冈林直肠侧腔、分离输尿管隧道、切离骨盆漏斗韧带、分离直肠阴道隔等。  10. 前方操作：包括剥离膀胱、游离前部输尿管、切离膀胱子宫韧带后层等。  11. 切离子宫深静脉和韧带：在髂内静脉回流前切断子宫深静脉，处理直肠阴道韧带和膀胱阴道韧带。  12. 切断阴道和缝合残端：切断阴道旁结缔组织，缝合阴道残端，放置引流管。  13. 关腹：止血后关闭腹腔。  该流程强调解剖学系统化操作，以保留盆腔神经丛和膀胱神经支为目标（相似度: 0.456）。 | B | B | B |
| **Question 118: 盆腔淋巴清扫在进行血管鞘剥离时，文本中明确指出了哪一种操作方法存在撕裂主血管的风险，因此不被推荐？** | | | | |
| Chunk size=512, Overlap=0 Using TokenTextSplitter | 盆腔淋巴清扫在进行血管鞘剥离时，文本中明确指出了哪一种操作方法存在撕裂主血管的风险，因此不被推荐？  根据文档上下文（相似度: 0.389），在盆腔淋巴清扫进行血管鞘剥离时，以下操作方法存在撕裂主血管（如髂内静脉或髂外静脉）的风险，因此不被推荐：  - 从内侧强力剔出淋巴结：文档明确指出，在闭孔区淋巴结清扫时，如果“由内侧强力剔出”淋巴结（即从血管内侧强行剥离），易导致血管损伤和大出血。  原因：髂外静脉和髂内动脉区域血管壁薄，且与淋巴结紧密粘连，强力操作可能撕裂血管或招致意外出血。推荐方法是从外侧解剖（如先分离腰大肌与髂血管），以安全暴露血管。 | C | C | C |
| Chunk size=256, Overlap=100 Using SentenceSplitter | 盆腔淋巴清扫在进行血管鞘剥离时，文本中明确指出了哪一种操作方法存在撕裂主血管的风险，因此不被推荐？  根据文档上下文（相似度: 0.411），在盆腔淋巴清扫中进行血管鞘剥离时，沿着长轴方向行血管鞘剥离的方法存在撕裂主血管的风险，因此不被推荐。原因如下：  - 这种方法可能导致壁侧静脉支被拔出，从而撕裂主血管（如髂外动静脉）。  - 推荐的方法是：沿血管长轴切开血管鞘后，向与血管垂直的方向剥离，使用钳子固定血管鞘并剪断疏松结缔组织，以避免损伤。 | B | A | A |
| **Question 119: 保留神经广泛全子宫切除术中，切除附着于髂外静脉的转移淋巴结时，应如何操作？为什么需要这样操作？** | | | | |
| Chunk size=512, Overlap=0 Using TokenTextSplitter | 保留神经广泛全子宫切除术中，切除附着于髂外静脉的转移淋巴结时，应如何操作？为什么需要这样操作？  根据文档上下文（相似度: 0.455 和 0.455），切除附着于髂外静脉的转移淋巴结时，操作方法和原因如下：  - 操作方法：   - 使用输尿管钩将髂外动脉向上提拉，暴露髂外静脉。   - 用淋巴结钳钳夹含有淋巴结的脂肪块，并向近身处（头侧）牵拉。   - 全周剥离髂外静脉的血管鞘，小心分离淋巴结与静脉的粘连，然后在腹股沟处离断。   - 操作中避免使用单极电凝，推荐用剪刀或超声刀轻柔剥离，防止损伤静脉壁。  - 为什么需要这样操作：   - 髂外静脉壁薄且易损伤，强力操作可能导致静脉破裂、血肿或意外出血。   - 淋巴结与静脉联系紧密（尤其在腹股沟深淋巴结区域），全周剥离血管鞘能确保完整切除淋巴结，同时减少癌细胞扩散风险（如文档提到，过早阻断血流可能增加转移风险）。   - 这样操作能保护闭孔神经等结构，符合保留神经原则。 | A | B | B |
| Chunk size=256, Overlap=100 Using SentenceSplitter | 保留神经广泛全子宫切除术中，切除附着于髂外静脉的转移淋巴结时，应如何操作？为什么需要这样操作？  基于文档上下文（相似度: 0.512, 0.423），切除附着于髂外静脉的转移淋巴结时应按以下方式操作：  - 操作方式：   - 使用超声刀和细剪刀进行锐性或钝性分离，从周围组织旁一点点分离淋巴结。   - 用指尖保护静脉壁，同时小心破碎和分离淋巴结与静脉之间的结缔组织。   - 准备Satinsky血管钳、血管带及缝合工具以应对可能的血管损伤。  - 为什么需要这样操作：   - 癌症很少浸润到静脉壁，因此耐心操作可以安全切除淋巴结，避免不必要的放弃。   - 这种方法能减少血管损伤风险（如撕裂或出血），确保根治性目标，同时使用超声刀辅助可提高安全性（注意避免超声波对血管的损伤）。   - 文档强调，转移淋巴结通常固定于血管鞘上，但通过小心剥离可完整切除，无需过早放弃（相似度: 0.411）。 | A | A | A |
| **Question 120: 保留神经广泛全子宫切除术进行淋巴结清扫时，骼内动静脉鞘的剥离应在手术何时进行？** | | | | |
| Chunk size=512, Overlap=0 Using TokenTextSplitter | 保留神经广泛全子宫切除术进行淋巴结清扫时，骼内动静脉鞘的剥离应在手术何时进行？  根据文档上下文（相似度: 0.455），骼内动静脉鞘的剥离应在以下手术阶段进行：  - 在清扫髂内淋巴结时进行：具体在淋巴结清扫顺序的第6步（清扫髂内淋巴结阶段）。文档明确说明：“在做骼内淋巴结清扫的时候就已经开始骼内动脉血管鞘的剥离了”。  - 操作细节：从动脉鞘的腹侧做切口，向末梢推进剥离，到达脐侧韧带分支部。同时，剥离深部的髂内静脉鞘，以暴露Latzko直肠侧腔。  - 时间点：在盆腔淋巴结清扫的整体流程中，髂内淋巴结清扫位于闭孔淋巴结清扫之后（顺序为：髂外淋巴结 → 腹股沟淋巴结 → 闭孔淋巴结 → 髂内淋巴结）。剥离血管鞘是清扫髂内淋巴结的关键步骤，旨在安全移除淋巴结并减少出血风险。 | B | B | B |
| Chunk size=256, Overlap=100 Using SentenceSplitter | 保留神经广泛全子宫切除术进行淋巴结清扫时，骼内动静脉鞘的剥离应在手术何时进行？  根据文档上下文（相似度: 0.434, 0.456），在保留神经广泛全子宫切除术的淋巴结清扫中，骼内动静脉鞘的剥离应在清扫骼内淋巴结时进行。具体顺序如下：  - 淋巴结清扫顺序为：剥离髂外动脉鞘（清扫浅部髂外淋巴结）→清扫腹股沟淋巴结→剥离髂外静脉鞘（清扫深部髂外淋巴结）→清扫闭孔淋巴结→清扫骼内淋巴结（此时剥离骼内动静脉鞘）→清扫颈横韧带淋巴结等。  - 剥离操作需在视野良好的状况下进行，避免在同等深度下显露血管时改变方向，以预留修复空间（相似度: 0.434）。  - 该步骤是淋巴结清扫的核心部分，旨在彻底清除转移淋巴结，同时保护神经结构。 | B | B | B |
| **Question 121: 腹主动脉旁淋巴结清扫为何优选体腔镜？** | | | | |
| Chunk size=512, Overlap=0 Using TokenTextSplitter | 腹主动脉旁淋巴结清扫为何优选体腔镜？  在知识库中未找到答案。 | D | D | D |
| Chunk size=256, Overlap=100 Using SentenceSplitter | 腹主动脉旁淋巴结清扫为何优选体腔镜？  在提供的文档中，未找到关于腹主动脉旁淋巴结清扫为何优选体腔镜的具体原因或好处。文档片段[相似度: 0.557]提到“7.2 体腔镜的好处 114”，但未详细解释体腔镜的优势、原因或与其他方法的比较。其他片段也未涉及腹主动脉旁淋巴结清扫的具体技术细节或体腔镜的优选理由。  回答：在知识库中未找到答案。 | D | D | D |
| **Question 122: 保留神经广泛全子宫切除术中，发掘Latzko直肠侧腔的主要目的是什么？** | | | | |
| Chunk size=512, Overlap=0 Using TokenTextSplitter | 保留神经广泛全子宫切除术中，发掘Latzko直肠侧腔的主要目的是什么？  发掘Latzko直肠侧腔的主要目的是为了暴露并切断颈横韧带的起始部，便于彻底清扫血管分支部位，避免损伤神经结构，同时为后续操作（如子宫深静脉的分离）提供安全路径。  基于文档的细节：  - 在[相似度: 0.590]部分提到：“发掘Latzko直肠侧腔...对于暴露并切断颈横韧带起始部有利”。  - 在[相似度: 0.548]部分进一步说明：“发掘Latzko直肠侧腔...目的是为了可以一根一根地露出颈横韧带中的血管分支部...避免联合结扎（Massengigatur）”。  - 在[相似度: 0.508]部分强调：“引入Latzko手术是为了发掘出Latzko直肠侧腔和膀胱侧间隙，充分露出颈横韧带起始部，使得此处的清扫进行得更为彻底”。  综上，文档明确指出，发掘Latzko直肠侧腔的核心是暴露颈横韧带起始部，以精确处理血管（如子宫深静脉），并支持保留神经的手术策略（如避免损伤盆腔内脏神经）。 | A | A | A |
| Chunk size=256, Overlap=100 Using SentenceSplitter | 保留神经广泛全子宫切除术中，发掘Latzko直肠侧腔的主要目的是什么？  基于文档内容，发掘Latzko直肠侧腔的主要目的是充分露出颈横韧带的起始部，以便进行更彻底的清扫，同时避免损伤关键结构（如骶前静脉丛）。这有助于在保留神经的手术中系统化操作，并减少并发症风险。  - 关键依据：   - 文档片段[相似度: 0.563]指出：“引入Latzko手术是为了发掘出Latzko直肠侧腔和膀胱侧间隙，充分露出颈横韧带起始部，使得此处的清扫进行得更为彻底。”   - 片段[相似度: 0.545]提到：“探查Latzko直肠侧腔头端室的腔隙，即可露出颈横韧带的起始部。”   - 片段[相似度: 0.569]强调：发掘Latzko直肠侧腔有助于避免损伤骶前静脉丛和臀下阴部内共同管，这是事故预防的关键。   回答：发掘Latzko直肠侧腔的主要目的是充分暴露颈横韧带的起始部，以便进行彻底清扫，并减少手术风险（如出血或神经损伤）。 | A | A | A |
| **Question 123: 根据冈林术式，膀胱子宫韧带后层、子宫颈部外侧缘和膀胱外侧缘共同构成了一个怎样的立体几何形态？与小林和真柄的二维平面理解相比，这种立体形态的关键区别是什么？** | | | | |
| Chunk size=512, Overlap=0 Using TokenTextSplitter | 根据冈林术式，膀胱子宫韧带后层、子宫颈部外侧缘和膀胱外侧缘共同构成了一个怎样的立体几何形态？与小林和真柄的二维平面理解相比，这种立体形态的关键区别是什么？  根据冈林术式，膀胱子宫韧带后层、子宫颈部外侧缘和膀胱外侧缘共同构成了一个三维立体结构，类似于一个“垂直的结缔组织束”，连接颈横韧带和膀胱，形成神经血管复合体（包括膀胱上静脉和膀胱神经支）。与小林和真柄的二维平面理解相比，关键区别在于冈林术式强调三维空间关系（如韧带在多个方向上的延伸和折返），而小林和真柄的描述是简化平面（如屋顶状或三明治状夹层）。  基于文档的细节：  - 立体几何形态： 在[相似度: 0.490]部分描述：“冈林将膀胱子宫韧带分成前层、后层...后层也称为膀胱阴道韧带...应该是指联系颈横韧带和膀胱的韧带”。在[相似度: 0.477]部分补充：“膀胱子宫韧带后层...是联系颈横韧带和膀胱的结缔组织束”，形成一种垂直或斜向的三维结构，涉及神经血管束（如膀胱上静脉和膀胱神经支）的立体走行。  - 与小林和真柄的二维理解比较：   - 小林术式：在[相似度: 0.490]部分描述为“覆盖着输尿管，就如民宅的屋顶”，这是一种二维平面覆盖模型，将结构简化为单层或双层平面。   - 真柄术式：在[相似度: 0.490]部分描述为“如三明治样夹着输尿管”，同样是二维平面夹层模型，强调前后关系而非三维空间。   - 关键区别： 冈林术式的立体形态更复杂，涉及多方向连接（如头尾侧、腹背侧），便于在手术中分离神经和血管；而小林和真柄的二维模型忽略了深度和折返关系，可能导致手术中神经保留不精确或损伤风险增加。文档在[相似度: 0.590]部分总结：“冈林术式是三维的...明确它们与颈横韧带的立体结构”，突出了这种区别。 | B | B | B |
| Chunk size=256, Overlap=100 Using SentenceSplitter | 根据冈林术式，膀胱子宫韧带后层、子宫颈部外侧缘和膀胱外侧缘共同构成了一个怎样的立体几何形态？与小林和真柄的二维平面理解相比，这种立体形态的关键区别是什么？  基于文档，冈林术式中，膀胱子宫韧带后层、子宫颈部外侧缘和膀胱外侧缘共同构成了一个三维立体结构，涉及多个腔隙（如阴道侧间隙和膀胱侧间隙）和韧带的分层，形成类似“立体网络”或“复合几何体”。与小林和真柄的二维平面理解相比，关键区别在于冈林术式强调深度和层次分离（三维），而小林和真柄的描述是扁平、平行附着（二维），缺乏立体性。  - 立体几何形态：   - 文档片段[相似度: 0.546]描述冈林术式为“三维的”，涉及发掘阴道侧间隙和膀胱侧间隙，分出膀胱子宫韧带前层和后层，明确它们与颈横韧带的立体结构。   - 片段[相似度: 0.522]提到：冈林术式通过腔隙发掘形成“由2层脏侧筋膜所构成的隔膜”，中间夹着输尿管和神经，构成一个立体框架。   - 具体形态：膀胱子宫韧带后层连接颈横韧带和膀胱，与子宫颈部外侧缘和膀胱外侧缘形成交错的三维空间，涉及韧带的分层和独立处理（如片段[相似度: 0.516]所述）。  - 关键区别：   - 冈林术式（三维）：强调解剖层次和深度，韧带被明确分层（前层和后层），操作基于发掘的腔隙（如阴道侧间隙），形成立体几何关系。   - 小林和真柄（二维）：小林描述为“如民宅的屋顶”覆盖输尿管（片段[相似度: 0.518]），真柄描述为“三明治样夹着输尿管”并平行附着于子宫颈/阴道外侧缘（片段[相似度: 0.518]），缺乏深度概念，是平面化的附着。   - 区别核心：冈林术式允许更精确的神经保留和血管处理，而二维理解可能导致操作不系统，增加损伤风险（片段[相似度: 0.518]指出二维描述“缺乏立体性”）。  回答：在冈林术式中，这些结构共同构成一个三维立体几何形态，涉及韧带分层和腔隙间的交错关系（如隔膜状网络）。与小林和真柄的二维平面理解相比，关键区别在于冈林强调深度和层次（三维立体），而小林（屋顶状）和真柄（三明治状）的描述是扁平、平行附着，缺乏立体性，这影响了手术的精确性和神经保留效果。 | B | A | B |
| **Question 124: 膀胱子宫韧带前层和后层在解剖学上有何特点？应该如何分离膀胱子宫韧带前层和后层？** | | | | |
| Chunk size=512, Overlap=0 Using TokenTextSplitter | 膀胱子宫韧带前层和后层在解剖学上有何特点？应该如何分离膀胱子宫韧带前层和后层？  膀胱子宫韧带前层在解剖学上是联系子宫颈和膀胱的韧带，相当于输尿管隧道顶（ureteric roof），结构较薄且覆盖输尿管；后层是联系颈横韧带和膀胱的韧带（也称为膀胱阴道韧带），包含神经血管束（如膀胱上静脉和膀胱神经支），结构较厚且与盆腔神经丛相关。分离方法应遵循冈林术式：先分离前层（通过发掘输尿管隧道入口），再分离后层（通过扩展阴道侧间隙和小心处理神经血管）。  基于文档的细节：  - 解剖学特点：   - 前层：在[相似度: 0.590]部分描述：“前层是联系子宫颈和膀胱的韧带，相当于欧美的输尿管隧道顶”。在[相似度: 0.477]部分补充：“前层相当于输尿管隧道顶，结构薄且易透见血管”。   - 后层：在[相似度: 0.590]部分：“后层也称为膀胱阴道韧带...联系颈横韧带和膀胱的韧带”。在[相似度: 0.490]部分强调：“后层包含膀胱上静脉和膀胱神经支，形成神经血管复合体”。  - 分离方法：   - 在[相似度: 0.490]部分描述：“发掘输尿管隧道入口部和切离尿管板...离断膀胱子宫韧带前层”。这表示先通过输尿管隧道入口分离前层。   - 在[相似度: 0.490]部分继续：“切离膀胱子宫韧带后层...需要扩展阴道侧间隙，并注意保留神经”。在[相似度: 0.477]部分补充：“分离后层时，应小心处理静脉丛和神经支，避免盲目操作”。   综上，分离过程需按顺序进行：先处理前层（暴露输尿管），再处理后层（在阴道侧间隙中操作），以最小化损伤风险。 | A | A | A |
| Chunk size=256, Overlap=100 Using SentenceSplitter | 膀胱子宫韧带前层和后层在解剖学上有何特点？应该如何分离膀胱子宫韧带前层和后层？  基于文档，膀胱子宫韧带前层和后层在解剖学上具有不同特点：前层联系子宫颈和膀胱（相当于输尿管隧道顶），后层联系颈横韧带和膀胱（包含神经血管束）。分离时，应通过发掘阴道侧间隙，使用器械（如Cooper剪刀）扩大间隙，然后独立切断后层。  - 解剖学特点：   - 前层：联系子宫颈和膀胱，结构较薄，相当于“输尿管隧道顶”（片段[相似度: 0.516]和[相似度: 0.518]）。   - 后层：联系颈横韧带和膀胱，是结缔组织束，包含神经血管束（如膀胱上静脉和膀胱神经支），结构更复杂（片段[相似度: 0.516]和[相似度: 0.522]）。   - 总体：两者是复合体，后层尤其关键于神经保留（片段[相似度: 0.518]）。  - 分离方法：   - 步骤：先发掘阴道侧间隙，然后用Cooper剪刀伸入间隙扩大，游离后层残端，最后用钳夹切断（片段[相似度: 0.518]描述：“将Cooper剪刀伸入阴道侧间隙中并扩大，游离膀胱子宫韧带后面的残端（膀胱子宫韧带后层），用双钳钳夹，中间切断，结扎”）。   - 注意：分离需精细操作，避免静脉出血（片段[相似度: 0.516]强调此操作易出血）。  回答：解剖学上，前层联系子宫颈和膀胱（类似输尿管隧道顶），后层联系颈横韧带和膀胱（含神经血管束）。分离时，应先发掘阴道侧间隙，用Cooper剪刀扩大间隙，游离后层残端，然后钳夹切断。 | A | B | A |
| **Question 125: 在进行切离子宫深静脉操作时，直肠子宫韧带作为解剖标志有何意义？** | | | | |
| Chunk size=512, Overlap=0 Using TokenTextSplitter | 在进行切离子宫深静脉操作时，直肠子宫韧带作为解剖标志有何意义？  直肠子宫韧带作为解剖标志，在切离子宫深静脉操作中起到定位和导向作用，帮助识别子宫深静脉的附着点，避免误伤周围静脉丛（如直肠中静脉或骶前静脉丛），并确保精确分离以保留神经结构。  基于文档的细节：  - 在[相似度: 0.535]部分提到：“子宫深静脉附着在直肠侧韧带上...分离直肠子宫韧带可以暴露子宫深静脉”。  - 在[相似度: 0.548]部分进一步说明：“子宫深静脉在直肠子宫韧带的附近...作为标志，有助于在操作中识别静脉位置，防止意外出血”。  - 在[相似度: 0.531]部分强调：“切离子宫深静脉时，直肠子宫韧带是关键的参考点，避免损伤臀下阴部内共同管或盆腔神经丛”。  综上，直肠子宫韧带作为解剖标志，确保手术能安全、精确地处理子宫深静脉，减少并发症风险。 | A | A | A |
| Chunk size=256, Overlap=100 Using SentenceSplitter | 在进行切离子宫深静脉操作时，直肠子宫韧带作为解剖标志有何意义？  基于文档，在切离子宫深静脉操作时，直肠子宫韧带作为解剖标志，用于指示切离的深度和位置，帮助调节切离范围以避免损伤神经（如腹下神经），并确保操作在安全区域内进行。  - 关键依据：   - 文档片段[相似度: 0.542]指出：“直肠子宫韧带的切离范围在发掘的冈林直肠侧腔的更深处，深度是可以调节的。这时候必须将腹下神经剥离下来。”这显示直肠子宫韧带作为深度参考点。   - 片段[相似度: 0.542]的图135描述：在切离子宫深静脉时，直肠子宫韧带帮助定位，确保切离不超出子宫深静脉的下缘（避免损伤盆丛神经）。   - 意义：韧带作为标志，辅助在复杂解剖中导航，尤其在涉及子宫深静脉背侧血管时（片段[相似度: 0.546]提到子宫深静脉背侧有血管，需谨慎操作）。  回答：直肠子宫韧带作为解剖标志，在切离子宫深静脉时指示切离深度和位置，帮助调节操作范围（如下缘界限），并确保剥离腹下神经以避免损伤。 | A | A | A |
| **Question 126: 在妇科手术中，如何正确识别和切离直肠阴道韧带以避免损伤盆腔神经丛？** | | | | |
| Chunk size=512, Overlap=0 Using TokenTextSplitter | 在妇科手术中，如何正确识别和切离直肠阴道韧带以避免损伤盆腔神经丛？  在文档中，直肠阴道韧带的识别和切离是广泛全子宫切除术的关键步骤，以避免损伤盆腔神经丛（即盆腔自主神经）。文档强调通过解剖学分离来保护神经，具体方法如下：  - 识别位置：直肠阴道韧带位于子宫深静脉子宫支被切离处的正下方（背侧），相当于Wertheim手术中第2把钳子的位置。操作时需在开放膀胱侧间隙和直肠侧腔后，通过钳夹该区域来定位（参考[相似度: 0.529]片段）。 - 避免神经损伤的方法：采用神经保留技术，分离血管部和神经部。具体操作是：  - 在颈横韧带和膀胱子宫韧带后层之间，识别血管神经三角部（由疏松结缔组织构成）。  - 将主韧带血管束与深部的自主神经分离，只切断血管部分，保留神经部分。这通过精细解剖实现，例如使用超声刀辅助分离，避免联合结扎（Massengigatur），以减少对神经丛的损伤（参考[相似度: 0.452]片段）。  - 在切离过程中，避免过度牵拉或盲目钳夹，以防损伤神经。文档提到，保留神经的手术需在术中观察输尿管和盆腔自主神经的走行，确保操作在直视下进行（参考[相似度: 0.452]片段）。  总之，正确识别需基于解剖标志（如子宫深静脉位置），切离时采用分离式技术只处理血管部分，以保护盆腔神经丛。 | C | C | C |
| Chunk size=256, Overlap=100 Using SentenceSplitter | 在妇科手术中，如何正确识别和切离直肠阴道韧带以避免损伤盆腔神经丛？  在知识库中未找到答案。  文档中多次提到直肠阴道韧带（例如在“切离直肠阴道韧带和膀胱阴道韧带”和“分离并切开宫骶韧带及直肠子宫韧带”等部分），但未提供具体操作步骤来识别和切离该韧带以避免损伤盆腔神经丛。文档讨论了保留神经的手术概念（如“以保留神经来考虑手术方法”），但没有详细描述如何在实际操作中识别韧带位置或避免神经损伤的技术细节。 | D | D | D |
| **Question 127: 在阴道断端缝合中，Davydov法的具体操作步骤有哪些？** | | | | |
| Chunk size=512, Overlap=0 Using TokenTextSplitter | 在阴道断端缝合中，Davydov法的具体操作步骤有哪些？  在提供的文档中，没有提到"Davydov法"或类似术语。文档描述了阴道断端缝合的一般方法，如间断“8”字缝合或连续锁边缝合，但未指定任何名为Davydov的技术。因此，无法从提供的文档中找到关于Davydov法的具体操作步骤。  回答： 在知识库中未找到答案。 | D | D | D |
| Chunk size=256, Overlap=100 Using SentenceSplitter | 在阴道断端缝合中，Davydov法的具体操作步骤有哪些？  基于文档内容，Davydov法是一种用于阴道断端缝合的技术，旨在避免阴道短缩。具体操作步骤如下（源自文档描述）：  1. 缝合膀胱腹膜到阴道前壁：将膀胱腹膜与阴道前壁断端进行结节缝合（即间断缝合）。  2. 缝合直肠浆膜到阴道后壁：同样使用结节缝合，将道格拉斯陷凹的腹膜（直肠浆膜）与阴道后壁断端连接。  3. 缝合膀胱腹膜和直肠浆膜：在中间部位，将膀胱腹膜和直肠浆膜相互缝合，以闭合断端并维持阴道长度。  文档指出，此方法有助于预测和保持阴道长度，并可结合使用可吸收线（如“阴道缝合用可吸收线做连续缝合”）。注意：文档提到此方法引自“远藤的手术书”，但未提供更详细的图解或变体。 | A | A | A |
| **Question 128: 请简述次广泛子宫切除术手术流程。** | | | | |
| Chunk size=512, Overlap=0 Using TokenTextSplitter | 请简述次广泛子宫切除术手术流程  文档中详细描述了次广泛子宫切除术（也称为次广泛全子宫切除术）的手术流程，主要基于宫颈癌手术的分类和操作步骤。以下是基于文档的简述流程：  1. 开腹：进入腹腔，固定子宫（参考[相似度: 0.449]片段）。 2. 切离子宫圆韧带：在中段钳夹、切断并结扎（参考[相似度: 0.449]片段）。 3. 切开髂窝腹膜：暴露盆腔结构，便于后续操作（参考[相似度: 0.449]片段）。 4. 开放膀胱侧间隙：发掘间隙，但无需深入至肛提肌上筋膜（参考[相似度: 0.449]片段）。 5. 清扫盆腔淋巴结：优先切除前部淋巴结，重点处理闭孔、髂内和主韧带淋巴结，注意闭孔血管汇入髂内血管处的清扫（因涉及子宫深静脉回流）（参考[相似度: 0.449]片段）。 6. 开放Latzko直肠侧腔：发掘至子宫深静脉的高度（参考[相似度: 0.449]片段）。 7. 切开膀胱腹膜：分离膀胱，便于后续处理（参考[相似度: 0.449]片段）。 8. 分离并切断子宫动脉：在彻底清扫周围组织后切断，可保留输尿管支（参考[相似度: 0.449]片段）。 9. 开放冈林直肠侧腔：分离后部输尿管，形成尿管板（参考[相似度: 0.449]片段）。 10. 后续步骤：包括切离骨盆漏斗韧带、切开道格拉斯陷凹腹膜、分离直肠阴道隔、切离宫骶韧带和直肠子宫韧带、剥离膀胱、切断阴道并缝合（参考[相似度: 0.449]和[相似度: 0.534]片段）。  该手术的关键是切除范围限于子宫深静脉在膀胱上静脉汇合内侧处切断，颈横韧带切断深度仅到子宫动脉水平，以保留更多组织（参考[相似度: 0.534]片段）。 | A | A | A |
| Chunk size=256, Overlap=100 Using SentenceSplitter | 请简述次广泛子宫切除术手术流程  次广泛子宫切除术（subradical hysterectomy）的手术流程基于文档描述，主要针对宫颈癌等疾病，涉及子宫旁组织部分切除和选择性淋巴结清扫。流程简述如下：  1. 开腹：从耻骨联合上方沿中线切开腹壁，进入腹腔。  2. 切离子宫圆韧带：在中段钳夹、切断圆韧带，并用缝线结扎。  3. 切开髂窝腹膜：在骨盆入口处剪开阔韧带前叶，暴露手术区域。  4. 开放膀胱侧间隙：发掘膀胱侧间隙，但无需深入到底部（肛提肌上筋膜）。  5. 清扫盆腔淋巴结：优先切除前部淋巴结，重点清扫闭孔、髂内和主韧带淋巴结（注意闭孔血管汇入髂内血管附近，因涉及子宫深静脉回流）。  6. 开放Latzko直肠侧腔：发掘直肠侧腔至子宫深静脉的高度。  7. 切开膀胱腹膜：分离并处理膀胱反折腹膜。  8. 分离并切断子宫动脉：在子宫动脉周围彻底清扫后，切断子宫动脉（可保留输尿管支）。  9. 开放冈林直肠侧腔：分离后部输尿管，形成尿管板。  10. 处理阴道和缝合：切除阴道上1/3（约1/3长度），横断阴道并缝合残端（使用可吸收线）。  11. 关腹和引流：放置引流管（如T形管），常规关腹。  文档强调，此术式切除范围包括主韧带的1/2和阴道上1/3，同时进行选择性盆腔淋巴结清除（如髂总下段、髂外、闭孔区淋巴结），但不涉及子宫深静脉的深度处理（“子宫深静脉的切断在膀胱上静脉的合流内侧处进行”）。 | A | B | A |
| **Question 129: 针对III期宫颈癌向盆腔侧壁扩散患者，三林术式的骼内动静脉系血管处理原则是什么？** | | | | |
| Chunk size=512, Overlap=0 Using TokenTextSplitter | 针对III期宫颈癌向盆腔侧壁扩散患者，三林术式的骼内动静脉系血管处理原则是什么？  针对III期宫颈癌向盆腔侧壁扩散的患者，文档描述三林术式（超广泛全子宫切除术）的髂内动静脉系血管处理原则是全部摘除（extirpation），以彻底切除癌浸润组织。具体原则基于血管系统的解剖和分步结扎：  - 血管系统构成：髂内动静脉系统包括脏侧支（如子宫动脉、膀胱动静脉、直肠中动静脉）、前壁侧支（如脐侧动脉、闭孔动静脉、阴部内动静脉）和后壁侧支（如髂腰动静脉、骶骨外侧动静脉、臀上下动静脉）（参考[相似度: 0.529]片段）。 - 处理原则：  - 第1结扎：结扎并切断闭孔血管（前壁侧支）。  - 第2结扎：在臀上血管分支后，对下游的髂内血管干行结扎和切断。  - 第3结扎：在臀下阴部内共同管分支前（梨状肌下口处），结扎并切断该段血管，确保在臀上静脉分支以下到阴部管（Alcock管）的范围内全部摘除髂内动静脉系（参考[相似度: 0.529]和[相似度: 0.427]片段）。 - 意图：完全摘除主韧带连同髂内血管干，以应对盆腔侧壁扩散，避免残留癌细胞。但文档指出，此方法未处理通向膀胱和直肠的脏侧支，可能导致矛盾（参考[相似度: 0.427]片段）。  总之，原则是分三步结扎关键血管点，实现髂内动静脉系的整体摘除。 | B | A | A |
| Chunk size=256, Overlap=100 Using SentenceSplitter | 针对III期宫颈癌向盆腔侧壁扩散患者，三林术式的骼内动静脉系血管处理原则是什么？  针对III期宫颈癌向盆腔侧壁扩散的患者，三林术式（超广泛全子宫切除术）的髂内动静脉系血管处理原则基于文档描述，分为三步结扎和切断，旨在完全摘除髂内血管干以达到骨盆壁切除。原则如下：  1. 第1结扎（闭孔血管）：首先结扎并切断闭孔动静脉（位于闭孔区）。  2. 第2结扎（髂内血管干）：在臀上动静脉分支后，立即对下游的髂内血管干进行结扎和切断（确保切除范围在子宫深静脉回流的下游）。  3. 第3结扎（臀下阴部内共同管）：在梨状肌下口处，臀下阴部内动静脉共同管发出分支之前，进行联合结扎和切断。  文档指出，此方法要求“系统的解剖学知识、丰富的经验和高超的技术”，并强调髂内血管的摘除范围在“子宫深静脉向髂内静脉回流的下游处进行”（即臀上静脉分支以下和臀下阴部内血管分支以上之间）。目的是扩大切除至骨盆侧壁，但文档也提到该方法存在高风险和解剖学矛盾（如“三林的想法中有解剖学上的矛盾”），需谨慎操作。 | A | B | A |
| **Question 130: 隐静脉裂孔附近大隐静脉的主要属支有哪些？** | | | | |
| Chunk size=512, Overlap=0 Using TokenTextSplitter | 隐静脉裂孔附近大隐静脉的主要属支有哪些？  在提供的文档中，没有提到"隐静脉裂孔"或"大隐静脉"。文档专注于妇科盆腔手术的解剖和操作，如髂内动静脉、子宫动静脉等盆腔血管系统，未涉及下肢静脉结构如大隐静脉或其属支。因此，无法从文档中找到相关信息。  回答： 在知识库中未找到答案。 | D | D | D |
| Chunk size=256, Overlap=100 Using SentenceSplitter | 隐静脉裂孔附近大隐静脉的主要属支有哪些？  在知识库中未找到答案。  文档专注于妇科盆腔手术（如子宫切除术、宫颈癌手术），涉及血管如髂内动静脉、子宫动脉、子宫深静脉等，但未提及下肢解剖相关的隐静脉裂孔（saphenous opening）或大隐静脉（great saphenous vein）及其属支。文档内容局限于盆腔血管系统，无相关信息。 | D | D | D |
| **Question 131: 在分离髂内血管系统以处理后干分支时，应在盆壁静脉与其汇入臀上静脉处近侧进行结扎，请问这一手术策略背后的解剖学原因是什么？** | | | | |
| Chunk size=512, Overlap=0 Using TokenTextSplitter | 在分离髂内血管系统以处理后干分支时，应在盆壁静脉与其汇入臀上静脉处近侧进行结扎，请问这一手术策略背后的解剖学原因是什么？  在文档中，髂内血管系统的解剖结构被描述为妇科肿瘤手术中常见的出血源。具体来说，后干（即臀上静脉）及其属支（如从骶侧孔出来的静脉）位于盆腔深部，与髂总静脉、髂外静脉和髂内静脉紧密相关。手术中，如果损伤这些血管，会导致严重甚至致命的大出血，因为该区域血管丰富、位置深在，止血困难（例如，文档提到“妇科癌肿手术时的另一大出血源是损伤后干即臀上静脉或任一条较深的属支”，且“骶前静脉一旦损伤可导致致命的大出血”）。在盆壁静脉汇入臀上静脉的近侧进行结扎，可以提前阻断血流，减少手术操作中意外损伤的风险，避免因出血模糊手术视野而导致的误操作（如损伤邻近的神经或输尿管）。这一策略基于解剖学上的高风险区域设计，旨在提高手术安全性。  （来源：文档片段[相似度: 0.433]和[相似度: 0.381]） | A | B | A |
| Chunk size=256, Overlap=100 Using SentenceSplitter | 在分离髂内血管系统以处理后干分支时，应在盆壁静脉与其汇入臀上静脉处近侧进行结扎，请问这一手术策略背后的解剖学原因是什么？  基于文档内容，这一手术策略的解剖学原因是为了避免臀部和坐骨神经的局部缺血症状。文档中提到：“当为控制或减少失血行双侧髂内动脉结扎时，应把结扎线放在后分支的远侧，结扎高于此水平，可能产生臀部和坐骨神经的局部缺血症状。” 髂内血管的后干分支（如臀上静脉）负责臀部和坐骨神经区域的血液供应。如果结扎位置过高（即近侧于汇入点），可能阻断这些关键区域的血液流动，导致缺血性损伤。因此，结扎应在盆壁静脉汇入臀上静脉的远侧进行，以保留臀上静脉的血流，防止并发症。 | C | C | C |
| **Question 132: 妇科肿瘤手术的常见体位包括哪些？** | | | | |
| Chunk size=512, Overlap=0 Using TokenTextSplitter | 妇科肿瘤手术的常见体位包括哪些？  文档中明确描述了妇科肿瘤手术的常见体位，这些体位旨在充分暴露手术视野，便于操作，尤其针对肥胖病人或特定手术类型：  - 仰卧位：大多数经腹部手术的常规体位，病人取平卧位，两侧髂嵴平行超过手术台上半截，使骨盆展开，便于盆腔操作。  - 头低仰卧位：用于腹腔镜手术，提供最佳盆腔暴露；重力作用使大、小肠移至上腹部，减少对盆腔的干扰。  - 膀胱截石位：常用于会阴或阴道手术，提供良好的会阴暴露；分为极高和低截石位，但需注意避免大腿屈曲超过90°以防神经损伤（如股神经或坐骨神经），且腿部应垫软布防止压迫。  此外，文档还提到特殊调整：如肥胖病人可在腰骶部放置海绵垫或长枕头，使骨盆后方略高、大腿稍下曲，以扩大骨盆入口平面和延长脐耻距离，便于深部操作。  （来源：文档片段[相似度: 0.467]） | B | A | A |
| Chunk size=256, Overlap=100 Using SentenceSplitter | 妇科肿瘤手术的常见体位包括哪些？  基于文档内容，妇科肿瘤手术的常见体位包括：  - 仰卧位（过伸张体位）：大多数经腹部手术采用，病人取仰卧位，两侧髂嵴平行超过手术台上半截，使骨盆展开，便于暴露后腹部和盆腔深部。肥胖病人可在腰骶部放置海绵垫或长枕头，以扩大骨盆入口。  - 头低仰卧位：用于腹腔镜手术，通过重力使大、小肠移至上腹部，提供最佳盆腔暴露。  - 膀胱截石位：常用于需要会阴暴露的手术，如阴道或腹腔镜操作。截石位的高低程度可调，极高和低截石位最常用，便于手术者和助手操作。  文档来源："在妇科肿瘤手术时，病人的体位十分重要...大多数妇科肿瘤手术是经腹部施行，病人常规取仰卧位...另一种体位是头低仰卧位...还有一种体位是膀胱截石位。" | A | A | A |
| **Question 133: 妇科肿瘤手术前应进行哪些实验室检查？若出现指标异常应如何处理？** | | | | |
| Chunk size=512, Overlap=0 Using TokenTextSplitter | 妇科肿瘤手术前应进行哪些实验室检查？若出现指标异常应如何处理？  文档中详细列出了妇科肿瘤手术前的实验室检查项目及异常处理原则：  - 实验室检查项目：   - 常规检查：血常规、尿常规、粪便常规（三大常规）。   - 血液生化：包括肝功能（如转氨酶、胆红素）、肾功能（血尿素氮、血清肌酐）、电解质（钾、钠等）、血糖、凝血功能（凝血酶原时间）。   - 心肺功能：心电图、血气分析（如动脉血氧分压PaO₂、混合静脉血氧分压PVO₂）。   - 其他针对性检查：根据肿瘤类型和症状，可能包括胸部X线（排除肺转移）、静脉肾盂造影（评估泌尿道梗阻）、CT/MRI（评估淋巴结转移）、PET（用于疑难病例），以及必要时行膀胱镜或纤维结肠镜。  - 指标异常的处理：   - 贫血或低血清蛋白：输血纠正血红蛋白，高营养疗法补充蛋白质和热量（每日3200 kcal）。   - 电解质失衡：如低钾血症（血钾<3.5 mmol/L），口服10%氯化钾溶液10-20 mL，3次/天；低钠血症则恢复正常盐摄取。   - 糖尿病：血糖>13.9 mmol/L时，使用短效胰岛素控制至<2.8 mmol/L；术前调整饮食，避免低血糖。   - 心肺功能异常：如低氧血症（PaO₂<60 mmHg），纠正水电解质平衡，必要时使用阿托品等药物；酸中毒时延期手术直至纠正。   - 感染或炎症：如白细胞升高，提前使用抗生素（如怀疑感染时提前2天开始）。  文档强调，术前必须全面评估并纠正异常，以降低手术风险。  （来源：文档片段[相似度: 0.398]、[相似度: 0.402]、[相似度: 0.404]） | B | B | B |
| Chunk size=256, Overlap=100 Using SentenceSplitter | 妇科肿瘤手术前应进行哪些实验室检查？若出现指标异常应如何处理？  基于文档内容，妇科肿瘤手术前应进行的实验室检查包括：  - 常规检查：所有病人需检查血红蛋白（Hb）。  - 针对特定人群：   - 年龄≥65岁：加查血糖、尿酸/肌酐、胸透、心电图。   - 恶性肿瘤病人：加查血小板、凝血功能（PT/APTT）、胸透。   - 其他：根据个体情况，可能包括电解质、肝功能等（表3-1指南）。   若出现指标异常的处理方法：  - 低钾血症（血钾<3.5mmol/L）：口服10%氯化钾溶液10~20ml，3次/天，以纠正电解质失衡。  - 糖尿病（血糖异常）：通过饮食控制达到适宜血糖水平，关注相关并发症（如血管疾病），术前调整药物（如类固醇激素需提前停药）。  - 凝血功能异常（PT/APTT异常）：术前评估出血风险，必要时延期手术或纠正凝血因子缺乏；药物诱导的血小板异常需停药7~10天。  - 营养不良或低蛋白血症：评估营养状态（如血浆蛋白），必要时进行肠外营养（TPN）支持。  文档来源："术前检查和病人准备按常规进行...实验室检查...表3-1妇科手术前实验室及其他检查指南" 及 "血钾低于3.5mmol/L，给予口服10%氯化钾溶液10~20ml，3次/天" 和 "术前应通过饮食控制达到适宜的血糖水平"。 | B | B | B |
| **Question 134: 妇科肿瘤手术预防性抗生素在术前的最佳给药时间是什么时候？** | | | | |
| Chunk size=512, Overlap=0 Using TokenTextSplitter | 妇科肿瘤手术预防性抗生素在术前的最佳给药时间是什么时候？  文档中明确说明了预防性抗生素的给药时间：  - 对于没有感染症状的患者，抗生素应在术中给予。  - 如果怀疑病灶有感染（如肿瘤破溃或合并炎症），则提前2天开始给予抗生素。  这一策略基于感染风险评估，旨在预防术后并发症，如伤口感染或脓毒血症。文档未提及具体抗生素类型，但强调需根据病情调整。  （来源：文档片段[相似度: 0.416]） | D | D | D |
| Chunk size=256, Overlap=100 Using SentenceSplitter | 妇科肿瘤手术预防性抗生素在术前的最佳给药时间是什么时候？  在知识库中未找到答案。文档中提到“预防性抗生素的应用”作为术前准备的一部分，但没有指定最佳给药时间（如术前30分钟或具体时间点）。例如，文档仅概述：“包括手术野备皮/肠道准备、预防性抗生素的应用、深部静脉血栓(DVT)的预防”，但没有详细说明给药时机。因此，基于提供的上下文，无法确定最佳给药时间。 | D | D | D |
| **Question 135: 妇科肿瘤手术术前肠道准备通常包括哪些步骤？** | | | | |
| Chunk size=512, Overlap=0 Using TokenTextSplitter | 妇科肿瘤手术术前肠道准备通常包括哪些步骤？  文档中详细描述了术前肠道准备的步骤，主要针对可能涉及肠道切除的手术（如卵巢癌或直肠受累）：  - 饮食调整：   - 术前1天开始无渣饮食（避免纤维食物）。   - 如果预计可能切除直肠，术前3天开始无渣饮食，术前1天禁食。  - 泻药使用：   - 术前1天服用镁制剂（如硫酸镁）和蓖麻油，以促进肠道排空。  - 肠道清洗：   - 术前2-3天进行阴道冲洗加肠道清洗。   - 手术当日早晨术前清洁灌肠（尤其对不全梗阻病人）。  - 抗生素预防：   - 口服肠道抗生素3-5天，常用甲硝唑加新霉素或小檗碱，以减少肠道菌群。  文档强调，这些步骤旨在清洁肠道、降低感染风险，并改善手术视野暴露。  （来源：文档片段[相似度: 0.398]和[相似度: 0.416]） | B | B | B |
| Chunk size=256, Overlap=100 Using SentenceSplitter | 妇科肿瘤手术术前肠道准备通常包括哪些步骤？  基于文档内容，妇科肿瘤手术术前肠道准备的步骤包括：  1. 饮食调整：   - 术前1天早晨开始无渣饮食（减少纤维摄入）。   - 如果预计可能切除直肠，术前3天开始无渣饮食，术前1天完全禁食。  2. 泻药使用：   - 术前1天服用镁制剂（如硫酸镁）和蓖麻油，以促进肠道排空。  3. 灌肠：   - 手术当日早晨行高位灌肠，通常口服300mL灌肠液或类似方法，以清洁肠道。  文档来源："术前1天早晨开始无渣饮食，晚餐后禁食。如果预计可能会切除直肠，术前3天开始无渣饮食，术前1天禁食。术前1天服用镁制剂以及蓖麻油，手术当日早晨再口服300mL行高位灌肠。" | B | B | B |
| **Question 136: 妇科肿瘤手术治疗术前阴道准备通常包括哪些步骤？** | | | | |
| Chunk size=512, Overlap=0 Using TokenTextSplitter | 妇科肿瘤手术治疗术前阴道准备通常包括哪些步骤？  在知识库中未找到答案。提供的文档片段主要描述了手术方式、适应证、手术范围及术后处理，但未提及妇科肿瘤手术前的阴道准备步骤（如阴道冲洗、消毒等具体操作）。 | D | D | D |
| Chunk size=256, Overlap=100 Using SentenceSplitter | 妇科肿瘤手术治疗术前阴道准备通常包括哪些步骤？  在提供的文档中，没有具体描述妇科肿瘤手术前的阴道准备步骤（如消毒、冲洗等）。文档提到了术前的一般检查和预防措施，例如：  - “术前应进行宫颈巴氏涂片、宫颈和阴道的阴道镜检查、盆腔和腹股沟CT扫描等检查。”（相似度0.520）  - “术前预防性使用抗生素,同时加强营养,改善全身状况,增加机体抵抗力。”（相似度0.517）  但这些内容涉及术前评估和全身准备，而非阴道准备的详细步骤（如阴道灌洗或消毒）。  回答： 在知识库中未找到答案。文档中没有提供妇科肿瘤手术前阴道准备的具体步骤信息。 | D | D | D |
| **Question 137: 外阴Paget病的首选治疗是什么?在什么情况下需要加做腹股沟淋巴结切除术？** | | | | |
| Chunk size=512, Overlap=0 Using TokenTextSplitter | 外阴Paget病的首选治疗是什么?在什么情况下需要加做腹股沟淋巴结切除术？  基于文档内容：  - 首选治疗：外阴Paget病的首选治疗是手术治疗。文档明确指出：“外阴Paget病首选手术治疗”（相似度: 0.501），并强调“外阴切除术是术后复发率最低的治疗方法”（相似度: 0.479）。  - 需要加做腹股沟淋巴结切除术的情况：在以下条件下需加做腹股沟淋巴结切除术：   1. 有皮下浸润或伴有女阴汗腺癌：如文档所述，“如有皮下浸润或伴有女阴汗腺癌...主张做根治性外阴切除和双侧腹股沟淋巴结切除术”（相似度: 0.527）。   2. 合并腺癌：文档提到“外阴Paget病合并腺癌的病人，应按照外阴侵袭性恶性肿瘤进行治疗，通常予以根治性外阴切除和腹股沟淋巴结切除术”（相似度: 0.501）。   3. 发现附近内脏器官的癌瘤：如“发现附近内脏器官的癌瘤时，主张做根治性外阴切除和双侧腹股沟淋巴结切除术”（相似度: 0.527）。   此外，文档还指出浸润性病变（如“若为浸润性病变或伴癌变”）需考虑淋巴结清扫（相似度: 0.479）。 | A | A | A |
| Chunk size=256, Overlap=100 Using SentenceSplitter | 外阴Paget病的首选治疗是什么?在什么情况下需要加做腹股沟淋巴结切除术？  基于文档内容，外阴Paget病的首选治疗是手术治疗，具体为外阴切除术。需要加做腹股沟淋巴结切除术的情况包括存在浸润性病变、合并腺癌、或伴有其他恶性肿瘤时。  - 首选治疗： “外阴Paget病首选手术治疗”（相似度0.633），手术方式包括“外阴切除术”或“根治性外阴切除”（相似度0.639）。  - 需要加做腹股沟淋巴结切除术的情况：   - “外阴Paget病合并腺癌的病人，应按照外阴侵袭性恶性肿瘤进行治疗，通常予以根治性外阴切除和腹股沟淋巴结切除术。”（相似度0.639 和 0.633）   - “如有皮下浸润或伴有女阴汗腺癌，或发现附近内脏器官的癌瘤时，主张做根治性外阴切除和双侧腹股沟淋巴结切除术。”（相似度0.591）   - “若外阴Paget病呈浸润性生长，合并腺癌时，需行广泛外阴切除及双侧腹股沟淋巴结清扫术”（相似度0.515）  回答：  - 首选治疗是手术治疗，通常为外阴切除术（如单纯外阴切除或根治性外阴切除）。  - 需要加做腹股沟淋巴结切除术的情况包括：存在浸润性病变、合并腺癌、伴有女阴汗腺癌、或发现附近内脏器官（如乳房、直肠等）的癌瘤时。 | B | A | A |
| **Question 138: 手术治疗外阴Paget病时，应采取哪些方法以降低复发风险？** | | | | |
| Chunk size=512, Overlap=0 Using TokenTextSplitter | 手术治疗外阴Paget病时，应采取哪些方法以降低复发风险？  基于文档内容，降低复发风险的方法包括：  1. 确保手术切缘阴性：文档强调“手术切缘阳性是术后复发的重要因素之一”，建议“在术前取多点活检样本和术时的冰冻切片以指导手术范围，可降低切缘阳性率并减少术后复发”（相似度: 0.479）。对于切缘阳性者，应“扩大手术范围直至切缘阴性为止”（相似度: 0.479）。  2. 选择适当的手术范围：对于病变广泛、高龄或随诊条件差的病例，推荐“外阴广泛切除术”，因为其复发率较低（相似度: 0.501）。文档指出“外阴切除术是术后复发率最低的治疗方法”，并建议“对于病变广泛、高龄、随诊条件差的病例，选择外阴广泛切除术更符合我国国情”（相似度: 0.501）。  3. 术时快速冰冻切片检查：术中应“作快速冰冻切片，观察切缘有无残存的癌细胞，以便于确定手术范围，预防术后复发”（相似度: 0.527）。这有助于即时调整手术范围，减少残留病灶。  4. 长期随访监测：由于外阴Paget病复发率高（文献报道复发率为11%-38%），文档建议“外阴Paget病病人须长期随访”，并“反复切除复发病灶”（相似度: 0.479）。  5. 多点、多部位取材送检：为避免术中冷冻切片假阴性（报道假阴性率46%），文档强调“必须多点、多部位取材送检”（相似度: 0.527），以准确评估浸润情况。 | A | A | A |
| Chunk size=256, Overlap=100 Using SentenceSplitter | 手术治疗外阴Paget病时，应采取哪些方法以降低复发风险？  文档中描述了降低复发风险的方法，主要包括确保手术切缘阴性、扩大切除范围、使用术中冰冻切片指导手术，以及多点取材送检。  - “为防止复发，切口应距离病灶边缘3cm以上，深达皮肤脂肪层，并包括所有毛发附件组织。”（相似度0.639）  - “手术切缘阳性是术后复发的重要因素之一...因此主张对病灶切缘阳性者，扩大手术范围直至切缘阴性为止”（相似度0.499）。  - “有学者认为，复发者多为病灶切缘有癌灶者，若在术前取多点活检样本和术时的冰冻切片以指导手术范围，可降低切缘阳性率并减少术后复发。”（相似度0.499）  - “必须多点、多部位取材送检。”（相似度0.591）  回答： 为降低复发风险，应采取以下方法：  1. 扩大切除范围： 切口距离病灶边缘至少3cm，深度达皮肤脂肪层，并包括所有毛发附件组织。  2. 确保切缘阴性： 通过术前多点活检和术中冰冻切片检查指导手术范围，如发现切缘阳性，立即扩大切除直至阴性。  3. 多点取材送检： 术中多点、多部位取材进行病理检查，以减少假阴性率。 | B | B | B |
| **Question 139: 在执行全阴道切除术时，为了完整剥离阴道袖套，需要在阴道的上、中、下段分别切断和处理哪些关键的韧带或肌肉组织？** | | | | |
| Chunk size=512, Overlap=0 Using TokenTextSplitter | 在执行全阴道切除术时，为了完整剥离阴道袖套，需要在阴道的上、中、下段分别切断和处理哪些关键的韧带或肌肉组织？  在知识库中未找到详细答案。 | D | D | D |
| Chunk size=256, Overlap=100 Using SentenceSplitter | 在执行全阴道切除术时，为了完整剥离阴道袖套，需要在阴道的上、中、下段分别切断和处理哪些关键的韧带或肌肉组织？  在提供的文档中，没有具体描述全阴道切除术中针对阴道上、中、下段分别需要切断和处理的韧带或肌肉组织。文档提到了阴道袖套的形成过程，但未按上、中、下段细分：  - “环切阴道壁及形成阴道‘袖套’：...至少远离肿瘤边缘3cm，全层环形切开阴道壁...向上分离膀胱阴道间隙，剪开膀胱宫颈筋膜间的结缔组织，推开膀胱。然后钳夹阴道后壁切缘，向后上方分离直肠阴道间隙，达子宫直肠陷凹反折腹膜。再分别向侧盆壁方向游离、扩展阴道旁组织，靠外侧切断、缝扎。”（相似度0.559）  此段仅涉及一般性步骤（如处理膀胱阴道间隙、直肠阴道间隙和阴道旁组织），但没有指定上、中、下段的解剖结构（如主韧带、宫骶韧带等）。  回答： 在知识库中未找到答案。文档中没有提供全阴道切除术中针对阴道上、中、下段分别需要切断和处理的韧带或肌肉组织的具体信息。 | D | D | D |
| **Question 140: 一位患者在接受宫颈病变治疗后数月出现严重宫颈管狭窄，请分析各种宫颈病变治疗方式中（冷刀锥切、激光锥切、LEEP等），哪种手术方式最有可能导致此并发症？并阐述与此并发症发生相关的两个关键风险因素。** | | | | |
| Chunk size=512, Overlap=0 Using TokenTextSplitter | 一位患者在接受宫颈病变治疗后数月出现严重宫颈管狭窄，请分析各种宫颈病变治疗方式中（冷刀锥切、激光锥切、LEEP等），哪种手术方式最有可能导致此并发症？并阐述与此并发症发生相关的两个关键风险因素。  在知识库中未找到答案。提供的文档片段讨论了宫颈病变治疗（如锥切、子宫切除），但未比较冷刀锥切、激光锥切、LEEP等具体方式导致宫颈管狭窄的风险。文档提到“新形成的宫颈外口有狭窄的可能”（相似度: 0.455），但这是在描述根治性宫颈切除术后的并发症，而非针对锥切方式的分析。文档未提供风险因素的相关信息。 | D | D | D |
| Chunk size=256, Overlap=100 Using SentenceSplitter | 一位患者在接受宫颈病变治疗后数月出现严重宫颈管狭窄，请分析各种宫颈病变治疗方式中（冷刀锥切、激光锥切、LEEP等），哪种手术方式最有可能导致此并发症？并阐述与此并发症发生相关的两个关键风险因素  在提供的文档中，没有比较冷刀锥切、激光锥切和LEEP等宫颈病变治疗方式导致宫颈管狭窄的风险，也没有讨论此并发症的风险因素。文档提到了LEEP的应用，但未涉及并发症：  - “Leep刀宫颈锥切用于治疗宫颈早期浸润癌未见报道，从原理上讲是可行的，但需进行临床试验...”（相似度0.556）  - 其他部分讨论宫颈癌手术（如根治性子宫切除），但未提及宫颈管狭窄。  回答： 在知识库中未找到答案。文档中没有提供关于宫颈病变治疗方式（冷刀锥切、激光锥切、LEEP）导致宫颈管狭窄的风险比较或相关风险因素的信息。 | D | D | D |
| **Question 141: 筋膜内子宫切除术与保守性子宫切除术在解剖操作上有何区别？** | | | | |
| Chunk size=512, Overlap=0 Using TokenTextSplitter | 筋膜内子宫切除术与保守性子宫切除术在解剖操作上有何区别？  在解剖操作上，筋膜内子宫切除术与保守性（标准性）子宫切除术的主要区别在于宫颈筋膜的处理、膀胱推离程度以及直肠分离需求：  - 筋膜内子宫切除术：操作在宫颈筋膜内进行，保留宫颈全部或大部分筋膜。推开膀胱至宫颈中段即可，不需分离直肠。这减少了泌尿系统并发症的风险，因为操作限于宫颈峡部以下（相似度0.597片段）。  - 保守性子宫切除术：仅保留宫颈旁及其邻近的部分宫颈筋膜。术时必须推开膀胱至阴道前穹隆部，并根据阴道切除长度决定是否分离直肠。这涉及更广泛的膀胱推离，可能增加操作复杂性（相似度0.597片段）。  总之，筋膜内手术更注重保留筋膜和减少膀胱推离，而保守性手术则涉及更深的膀胱推离和可能的部分直肠分离。 | A | A | A |
| Chunk size=256, Overlap=100 Using SentenceSplitter | 筋膜内子宫切除术与保守性子宫切除术在解剖操作上有何区别？  根据文档内容，筋膜内子宫切除术与保守性子宫切除术在解剖操作上的主要区别如下： - 筋膜内子宫切除术：操作在宫颈筋膜内进行，保留了宫颈全部或大部分筋膜。手术时仅需推开膀胱至宫颈中段，不需要分离直肠。这减少了膀胱和直肠的分离范围，降低了邻近器官损伤的风险。 - 保守性子宫切除术：仅保留宫颈旁及其邻近的部分宫颈筋膜。手术时需推开膀胱至阴道前穹隆部，并根据阴道切除长度决定是否分离直肠。这增加了膀胱分离的范围，可能涉及更多组织操作。 文档中明确描述了这一区别："筋膜内子宫切除术...在宫颈筋膜内进行，保留了宫颈全部或大部分筋膜...推开膀胱至宫颈中段即可，不需分离直肠。而保守性子宫切除术...仅保留宫颈旁及其邻近的部分宫颈筋膜...术时须推开膀胱至阴道前穹隆部，根据阴道切除长度可分离或不分离直肠。"（相似度: 0.633）  # | A | A | A |
| **Question 142: 阴式子宫切除术中切除阴道上段长度的依据是什么？** | | | | |
| Chunk size=512, Overlap=0 Using TokenTextSplitter | 阴式子宫切除术中切除阴道上段长度的依据是什么？  阴式子宫切除术中切除阴道上段长度的依据是阴道镜检查或碘试验所示的病变区位置。具体来说：  - 切除长度应位于病变区以下0.5~0.6cm，一般切除1~2cm已足够。这确保了病变组织的完全切除，同时最小化复发风险（相似度0.522片段）。  此依据基于病变的视觉定位，目的是彻底清除病灶区域。 | B | A | A |
| Chunk size=256, Overlap=100 Using SentenceSplitter | 阴式子宫切除术中切除阴道上段长度的依据是什么？  根据文档内容，阴式子宫切除术中切除阴道上段长度的依据是阴道镜检查或碘试验所示的病变区位置。具体来说： - 切除长度应位于病变区以下 $0.5\sim 0.6\mathrm{cm}$ 处。 - 一般切除阴道 $1\sim 2\mathrm{cm}$ 已足够，这取决于病变范围。 文档中明确说明："切除阴道上段的长短应为根据阴道镜检查或碘试验所示的病变区以下 $0.5\sim 0.6\mathrm{cm}$ ，一般切除阴道 $1\sim 2\mathrm{cm}$ 已足够。"（相似度: 0.570）  # | A | A | A |
| **Question 143: 保守性子宫切除术中如何处理子宫血管和主韧带？** | | | | |
| Chunk size=512, Overlap=0 Using TokenTextSplitter | 保守性子宫切除术中如何处理子宫血管和主韧带？  在知识库中未找到答案。  - 提供的文档片段描述了保守性子宫切除术的总体步骤（如处理附件、圆韧带等），但没有具体说明如何处理子宫血管和主韧带。例如，相似度0.549片段提到手术涉及钳夹和切断组织，但未详细描述子宫血管和主韧带的处理技术。其他片段（如相似度0.597）讨论了筋膜外手术，但未覆盖保守性手术的血管和韧带细节。 | D | D | D |
| Chunk size=256, Overlap=100 Using SentenceSplitter | 保守性子宫切除术中如何处理子宫血管和主韧带？  根据文档内容，保守性子宫切除术中处理子宫血管和主韧带的方式如下： - 手术时需紧靠宫颈旁操作，以避免损伤输尿管。 - 具体方法：沿子宫颈侧壁钳夹、切断宫颈旁组织及阴道旁组织，包括主韧带、韧带（可能指骶韧带或宫骶韧带）和宫颈膀胱韧带等。这涉及直接钳夹和切断这些结构，确保不切及宫颈组织。 文档中描述："标准性子宫全切除术（又称保守性全子宫切除）...沿子宫颈侧壁钳夹、切断宫颈旁组织及阴道旁组织，包括主韧带、韧带、宫颈膀胱韧带等。为避免损伤输尿管，需紧靠宫颈旁操作..."（相似度: 0.532）。文档未提供更详细的血管结扎技术，但强调了紧靠宫颈操作以保护输尿管。  # | A | A | A |
| **Question 144: 宫颈上皮内瘤变治疗后复发的高危因素有哪些？** | | | | |
| Chunk size=512, Overlap=0 Using TokenTextSplitter | 宫颈上皮内瘤变治疗后复发的高危因素有哪些？  在知识库中未找到答案。  - 文档片段讨论了宫颈上皮内瘤变（CIN）的治疗方法（如子宫切除术和锥切术），并提到原位癌切除后仍有复发可能（相似度0.549片段），但没有列出具体的复发高危因素（如病变级别、切缘状态、HPV持续感染等）。其他片段聚焦于手术技术而非复发风险因素。 | D | D | D |
| Chunk size=256, Overlap=100 Using SentenceSplitter | 宫颈上皮内瘤变治疗后复发的高危因素有哪些？  在提供的文档中，没有直接提及宫颈上皮内瘤变（CIN）治疗后复发的高危因素。文档主要讨论了CIN的手术治疗方法（如子宫切除术的类型和适应证）、手术技巧以及随访重要性，但未列出具体的复发高危因素（如病变级别、切缘状态、HPV持续感染等）。  因此，基于文档内容：在知识库中未找到答案。  # | D | D | D |
| **Question 145: 什么情况下建议对子宫内膜增生病人进行子宫切除术？什么时候可使用药物治疗？** | | | | |
| Chunk size=512, Overlap=0 Using TokenTextSplitter | 什么情况下建议对子宫内膜增生病人进行子宫切除术？什么时候可使用药物治疗？  基于文档内容，建议如下：  - 建议子宫切除术的情况：   - 年龄在40岁以上，诊断明确，无生育要求者。   - 经正确的周期性药物治疗后，内膜持续增生或临床症状加重，并怀疑有癌变趋势或已发展为癌者。   - 阴道不规则出血经刮宫术或药物治疗不能控制，或产后复发者。   - 重度不典型增生同时合并有严重的子宫出血和（或）怀疑有雌激素分泌性卵巢肿瘤者（相似度0.508片段）。   此外，对于围绝经期和绝经后妇女，特别是重度不典型增生病人，应优先考虑子宫切除，除非有手术禁忌证（相似度0.478片段）。  - 建议药物治疗的情况：   - 单纯性增生或复合性增生（良性病变，癌变率低），尤其适用于年轻病人或有生育要求者，首选药物治疗（如孕激素或GnRHa）。药物治疗也适用于高血压、糖尿病、肥胖或年龄过大对手术耐受差者，在严密监测下进行（相似度0.508和0.478片段）。   药物治疗无效时，可考虑保守手术（如吸宫术）或子宫切除术。 | B | B | B |
| Chunk size=256, Overlap=100 Using SentenceSplitter | 什么情况下建议对子宫内膜增生病人进行子宫切除术？什么时候可使用药物治疗？  根据文档内容，子宫内膜增生病人的治疗建议如下： - 建议子宫切除术的情况：  - 年龄在40岁以上，诊断明确，无生育要求者。  - 经正确的周期性药物治疗后，内膜持续增生或临床症状加重，并怀疑有癌变趋势或已发展为癌者。  - 阴道不规则出血经刮宫术或药物治疗不能控制，或产后复发者。  - 重度不典型增生同时合并有严重的子宫出血和(或)怀疑有雌激素分泌性卵巢肿瘤者。  - 围绝经期和绝经后妇女，特别是不典型增生病人，应实施子宫切除，除非有严重手术禁忌证。 - 可使用药物治疗的情况：  - 年龄小于40岁，癌变倾向低，可采取积极的保守治疗；年轻且盼生育者，首选药物治疗。  - 高血压、糖尿病、肥胖或年龄过大对手术耐受差者，可在严密随诊及监测下先行药物治疗。  - 40岁以上至绝经前病人，可根据病人意愿选择药物治疗或手术治疗。 文档中明确说明："原则上对年龄小于40岁...首选药物治疗；对高血压、糖尿病、肥胖或年龄过大对手术耐受差者，也可考虑在严密随诊及监测下先行药物治疗；40岁以上至绝经前病人可根据病人意愿行药物治疗或手术治疗；围绝经期和绝经后妇女特别是不典型增生病人应实施子宫切除..."（相似度: 0.487）和 "子宫切除术适用于: 1)年龄在40岁以上... (2)经正确的周期性药物治疗后... (3)阴道不规则出血... (4)重度不典型增生..."（相似度: 0.475）。 | B | A | A |
| **Question 146: 在外阴浸润癌腹股沟深淋巴结切除术中，处理缝匠肌的目的是什么？** | | | | |
| Chunk size=512, Overlap=0 Using TokenTextSplitter | 在外阴浸润癌腹股沟深淋巴结切除术中，处理缝匠肌的目的是什么？  在知识库中未找到答案。  - 文档中多次提到缝匠肌作为解剖标志（例如，在腹股沟淋巴结切除术中，切除范围“外侧达缝匠肌”），但未明确说明处理缝匠肌的具体目的（如保护、暴露或避免损伤）。文档仅描述缝匠肌是手术范围的外侧边界，用于帮助识别筛状筋膜和界定淋巴结切除区域，但未提供处理目的的直接信息。 | D | D | D |
| Chunk size=256, Overlap=100 Using SentenceSplitter | 在外阴浸润癌腹股沟深淋巴结切除术中，处理缝匠肌的目的是什么？  在文档中，处理缝匠肌的目的是覆盖暴露的股血管，以减少术后并发症（如出血或感染）。具体来说，一些外科医生会在近髂前上棘处切断缝匠肌，然后将缝匠肌的游离缘缝合于腹股沟韧带上，以保护股血管区域（参考相似度0.504和0.486的片段）。 | A | B | A |
| **Question 147: 对于一名I期外阴癌患者，其肿瘤直径小于等于2cm，病灶局限在一侧大阴唇，但术后病理组织学检查提示血管或淋巴管间隙受侵犯，则应为该患者施行何种术式？** | | | | |
| Chunk size=512, Overlap=0 Using TokenTextSplitter | 对于一名I期外阴癌患者，其肿瘤直径小于等于2cm，病灶局限在一侧大阴唇，但术后病理组织学检查提示血管或淋巴管间隙受侵犯，则应为该患者施行何种术式？  应为该患者施行根治性全外阴切除术及双侧腹股沟淋巴结切除术。  - 依据文档内容（相似度: 0.637片段）：对于I期外阴癌患者，如果血管或淋巴管间隙受侵犯，无论肿瘤大小或位置（包括局限在一侧大阴唇），都应行“外阴根治加双侧腹股沟淋巴结切除”。文档明确指出：“如血管或淋巴管间隙受侵犯，应行外阴根治加双侧腹股沟淋巴结切除。”这对应于根治性全外阴切除术（即传统标准手术）及双侧腹股沟淋巴结切除术，以确保彻底清除潜在转移风险。 | A | A | A |
| Chunk size=256, Overlap=100 Using SentenceSplitter | 对于一名I期外阴癌患者，其肿瘤直径小于等于2cm，病灶局限在一侧大阴唇，但术后病理组织学检查提示血管或淋巴管间隙受侵犯，则应为该患者施行何种术式？  根据文档内容，当I期外阴癌患者存在血管或淋巴管间隙受侵犯时，应施行根治性全外阴切除术加双侧腹股沟淋巴结切除术。这是因为血管或淋巴管侵犯会增加淋巴结转移的风险，因此需要更彻底的手术范围（参考相似度0.644和0.568的片段）。 | A | A | A |
| **Question 148: 在腹股沟淋巴结切除术中，分离式切口和单一式切口的适用人群有何区别？** | | | | |
| Chunk size=512, Overlap=0 Using TokenTextSplitter | 在腹股沟淋巴结切除术中，分离式切口和单一式切口的适用人群有何区别？  分离式切口适用于外阴外侧或会阴体后部病灶、外阴前部较小癌灶且无腹股沟淋巴结转移者；单一式切口适用于局部广泛浸润的病人，特别是会阴前部有广泛浸润者。  - 依据文档内容（相似度: 0.535片段）：   - 分离式切口：多应用于“外阴外侧和会阴体后部的病灶，以及外阴前部较小的癌灶而临床无腹股沟淋巴结转移者”。优点是“可较多地保留会阴体和腹股沟切口间皮肤桥，术后病率较低”，但缺点是“局部广泛浸润的外阴癌失败率较高”。   - 单一式切口：适于“局部广泛浸润的病人，特别是会阴前部有广泛浸润者”。优点是“手术更为彻底”，但缺点是“术后病率比前者高”。选择时需考虑“肿瘤大小及分布”。 | A | A | A |
| Chunk size=256, Overlap=100 Using SentenceSplitter | 在腹股沟淋巴结切除术中，分离式切口和单一式切口的适用人群有何区别？  文档中明确描述了两种切口的适用人群区别：  - 分离式切口：适用于外阴外侧和会阴体后部的病灶，以及外阴前部较小的癌灶且临床无腹股沟淋巴结转移者。这种切口可较多地保留会阴体和腹股沟切口间的皮肤桥，术后病率较低，但局部广泛浸润的外阴癌失败率较高。  - 单一式切口：适用于局部广泛浸润的病人，特别是会阴前部有广泛浸润者。这种切口手术更为彻底，但术后病率较高（参考相似度0.676和0.592的片段）。 | A | A | A |
| **Question 149: 清除髂总血管及髂外动脉上淋巴脂肪组织的顺序是什么？** | | | | |
| Chunk size=512, Overlap=0 Using TokenTextSplitter | 清除髂总血管及髂外动脉上淋巴脂肪组织的顺序是什么？  清除顺序为先髂总血管区域，后髂外动脉区域。  - 依据文档内容（相似度: 0.471片段）：在腹腔镜下盆腔淋巴结切除术中，描述为“切除髂总淋巴结...清除从髂总血管到腹股沟韧带之间被覆盖的淋巴结”，然后“切除髂外淋巴结...位于髂外动脉和腰大肌之间”。文档明确提到“切除髂总淋巴结”在先，随后“切除髂外淋巴结”，表明顺序是自上而下：先处理髂总血管区域（包括髂总动脉分叉处），再处理髂外动脉区域。 | B | B | B |
| Chunk size=256, Overlap=100 Using SentenceSplitter | 清除髂总血管及髂外动脉上淋巴脂肪组织的顺序是什么？  文档中描述了清除淋巴脂肪组织的顺序：从髂总段开始，自上而下、由外向内依次切除髂总下段、髂外、腹股沟深、髂内、闭孔区淋巴脂肪组织（参考相似度0.486的片段）。 | B | B | B |
| **Question 150: 腹膜外盆腔淋巴组织清除术中在处理外阴癌根治术的创面时，对于引流问题存在哪两种不同的处理方式？** | | | | |
| Chunk size=512, Overlap=0 Using TokenTextSplitter | 腹膜外盆腔淋巴组织清除术中在处理外阴癌根治术的创面时，对于引流问题存在哪两种不同的处理方式？  两种处理方式是：放置橡皮引流管进行负压引流，或不放置引流管而采用绷带人字形加压包扎。  - 依据文档内容（相似度: 0.630片段）：在描述腹股沟淋巴组织清除术后的创面处理时，文档指出：“创面内放置橡皮引流管做负压引流用。有学者不主张放引流管，而用绷带人字形加压包扎，但包扎时要保持压力一致，以减少积液。”这明确列出了两种方式：   1. 放置橡皮引流管：用于负压引流，以减少积液和感染风险。   2. 绷带人字形加压包扎：不使用引流管，通过加压包扎控制积液，但需确保压力均匀。 | A | A | A |
| Chunk size=256, Overlap=100 Using SentenceSplitter | 腹膜外盆腔淋巴组织清除术中在处理外阴癌根治术的创面时，对于引流问题存在哪两种不同的处理方式？  在提供的文档内容中，没有明确提到腹膜外盆腔淋巴组织清除术创面引流问题的两种不同处理方式。文档仅提及了放置负压引流或密闭引流以减少术野积液（例如在相似度0.486和0.556的片段中），但没有对比或描述两种具体不同的处理方式。因此，在知识库中未找到答案。 | D | D | D |
| **Question 151: 根治性全外阴切除术中常见的切口类型有哪些？** | | | | |
| Chunk size=512, Overlap=0 Using TokenTextSplitter | 根治性全外阴切除术中常见的切口类型有哪些？  在提供的文档上下文中，没有明确描述根治性全外阴切除术中常见的切口类型。文档提到了腹股沟淋巴结切除术的切口类型（如分离式切口和单一式切口），但未具体列出根治性全外阴切除术本身的常见切口类型。因此，无法从提供的文档中找到答案。  答案： 在知识库中未找到答案。 | D | D | D |
| Chunk size=256, Overlap=100 Using SentenceSplitter | 根治性全外阴切除术中常见的切口类型有哪些？  根据文档内容（相似度: 0.453），根治性全外阴切除术中常见的切口类型有四种，具体描述如下： - 类型①：始于阴蒂上方约3cm，沿大阴唇外侧缘，汇合于会阴部中线（不切除阴阜）。 - 类型②：与类型①相同，但同时纵向切开阴阜皮肤约3cm（保留阴阜皮肤，切除皮下组织达耻骨筋膜）。文档中提到"笔者常采用(2)式切口"，表明这是常用类型。 - 类型③：沿耻骨联合上缘、阴阜外侧缘、大阴唇外侧缘，会合于会阴部。 - 类型④：基本同类型③，但外阴两侧切缘达大腿内侧面。 这些切口设计旨在确保肿瘤切除范围足够（切缘离肿瘤需达3cm），同时考虑术后功能和外观。 | A | A | A |
| **Question 152: 当外阴癌侵犯尿道时，文中根据侵犯的程度和范围，描述了哪三种逐级递进的扩大手术方案？请分别概括其核心操作和适用情况** | | | | |
| Chunk size=512, Overlap=0 Using TokenTextSplitter | 当外阴癌侵犯尿道时，文中根据侵犯的程度和范围，描述了哪三种逐级递进的扩大手术方案？请分别概括其核心操作和适用情况?  根据文档内容，当外阴癌侵犯尿道时，描述了三种逐级递进的扩大手术方案，具体如下：  1. 部分尿道切除术   - 核心操作：从尿道上方进行分离，深达肿瘤，切除适当长度的尿道部分。切除后，将尿道背筋膜缝合于耻骨联合骨膜上，以保证尿道突出和固定。尿道口与邻近皮瓣或阴道黏膜缝合，防止覆盖尿道口。   - 适用情况：适用于阴阜、阴蒂包皮及系带、阴蒂体、小阴唇前半部分、前庭或尿道轻微受累的情况，需要切除部分尿道但保留排尿功能。  2. 全尿道切除术   - 核心操作：行全尿道切除，保留膀胱内括约肌。采用膀胱肌瓣尿道成形术，即在膀胱前壁切取长形膀胱壁瓣（宽约4cm，长度根据需要），制作新尿道，以重建排尿功能。   - 适用情况：适用于外阴癌侵犯尿道深度达2-3cm者，需完全切除尿道但保留膀胱功能。  3. 前盆脏器切除术   - 核心操作：行外阴广泛切除术的同时，切除尿道、全膀胱，并进行回肠或乙状结肠代膀胱术（即尿流改道）。   - 适用情况：适用于外阴癌已浸润膀胱三角区者，属于晚期侵犯，需广泛切除以控制肿瘤。   这些方案基于侵犯程度递进：部分尿道切除用于轻度侵犯，全尿道切除用于中度侵犯（2-3cm），前盆脏器切除用于重度侵犯（累及膀胱三角）。文档强调，这些手术需结合根治性全外阴切除和双侧腹股沟淋巴结切除进行（来源：[相似度: 0.495]片段）。 | A | A | A |
| Chunk size=256, Overlap=100 Using SentenceSplitter | 当外阴癌侵犯尿道时，文中根据侵犯的程度和范围，描述了哪三种逐级递进的扩大手术方案？请分别概括其核心操作和适用情况?  文档中描述了三种递进的手术方案（基于相似度: 0.546 和 0.449）： 1. 部分尿道切除术：  - 核心操作：切除适当长度的受累尿道部分。分离从尿道上方进行，深达肿瘤，直观决定切除平面；切除后缝合尿道背筋膜于耻骨联合骨膜上，固定尿道位置，防止皮瓣覆盖尿道口，确保尿流呈直线。  - 适用情况：适用于癌灶侵犯下尿道（如阴阜、阴蒂包皮、小阴唇前部或前庭受累），属于Ⅲ期病例。目的是保留部分尿道功能。 2. 全尿道切除术：  - 核心操作：在行外阴广泛切除术的同时，切除全尿道，保留膀胱内括约肌；并行膀胱肌瓣尿道成形术（重建尿道以保留排尿功能）。  - 适用情况：适用于外阴癌侵犯尿道2~3cm者，属于IV期病例。当肿瘤侵犯范围较广但未累及膀胱时使用。 3. 扩大外阴根治术加膀胱切除或重建术：  - 核心操作：切除受累的邻近器官（如全尿道、膀胱、肛管或直肠下段），并行相应的尿道或膀胱重建术（如人工尿道或人工肛门重建）。  - 适用情况：适用于癌灶侵犯全尿道、膀胱、肛管或直肠下段的IV期病例。当侵犯范围广泛时，需结合术前或术后放疗/化疗。  这些方案是递进的，根据侵犯程度（从部分尿道到全尿道及膀胱）逐步扩大手术范围，旨在控制肿瘤并保留功能。 | A | A | A |
| **Question 153: 外阴癌根治术后常见的并发症包括哪些？** | | | | |
| Chunk size=512, Overlap=0 Using TokenTextSplitter | 外阴癌根治术后常见的并发症包括哪些？  根据文档中的表5-7和相关描述，外阴癌根治术后常见的并发症分为早期和晚期两类：  - 早期并发症（术后短期内发生）：   - 伤口裂开、感染、坏死（发生率85%）。   - 泌尿道感染（发生率18%）。   - 血栓性病变（如深静脉血栓，发生率9%）。   - 耻骨联合部分坏死（发生率<1%）。   - 股动脉出血（发生率<1%）。  - 晚期并发症（术后较长时间发生）：   - 下肢水肿（发生率69%，严重时可导致“象皮腿”）。   - 淋巴管炎、静脉炎、蜂窝织炎（发生率13%）。   - 阴道狭窄（发生率13%）。   - 盆腔松弛（发生率11%）。   - 压力性尿失禁（发生率11%，尤其当尿道切除超过2cm时）。   - 疝（发生率5%）。   - 尿道狭窄、脱垂（发生率2%）。   - 瘘（如尿道阴道瘘，发生率2%）。   - 直肠功能不全、脱垂（发生率1%）。 | A | A | A |
| Chunk size=256, Overlap=100 Using SentenceSplitter | 外阴癌根治术后常见的并发症包括哪些？  文档中详细列出了外阴癌根治术后的常见并发症（基于相似度: 0.532, 0.484, 0.484）： - 早期并发症（近发性）：  - 伤口裂开、感染和坏死：发生率高达85%（最常见）。  - 泌尿道感染：发生率约18%。  - 血栓性病变：发生率约9%（如深静脉血栓）。  - 其他：耻骨联合部分坏死（<1%）、股动脉出血（<1%）。 - 晚期并发症（迟发性）：  - 下肢水肿：最常见，发生率约69%（因淋巴回流障碍导致"象皮腿"）。  - 淋巴管炎、静脉炎、蜂窝织炎：发生率约13%。  - 阴道狭窄：发生率约13%。  - 盆腔松弛：发生率约11%。  - 压力性尿失禁：发生率约11%（尤其易发生在切除尿道2cm以上者）。  - 其他：疝（5%）、尿道狭窄或脱垂（2%）、瘘（2%）、直肠功能不全或脱垂（1%）。 这些并发症与术野大、皮瓣分离广、淋巴组织切除相关，需及时预防和处理（如穿弹性袜裤、抬高患肢）。 | A | A | A |
| **Question 154: 外阴癌手术后局部复发的主要风险因素有哪些？** | | | | |
| Chunk size=512, Overlap=0 Using TokenTextSplitter | 外阴癌手术后局部复发的主要风险因素有哪些？  文档中明确指出了外阴癌手术后局部复发的主要风险因素：  - 切缘不足：切缘距离肿瘤边缘小于1cm（或小于8mm）是复发的最佳预后因素。所有复发案例常与切缘不足相关，建议切缘应尽可能距肿瘤2-3cm以上。  - 肿瘤位置：肿瘤接近尿道口、肛门口等关键部位，导致切缘难以保证足够距离，增加复发风险。  - 临床期别：晚期病例（Ⅲ期、IV期）复发率更高，复发病例中以晚期为主。  - 原发灶大小和转移情况：首次手术时原发灶较大（如直径>2cm）和/或存在淋巴结转移者，复发更常见。  - 多中心病灶：外阴癌具有弥散性和多中心发生的特点，若手术未彻底清除所有病灶，易导致复发。  - 其他因素：合并外阴白斑或血管淋巴管间隙受侵犯（脉管浸润）也增加复发风险。   文档强调，切缘干净与否是控制复发的关键（来源：[相似度: 0.495]片段中的复发相关描述）。 | A | A | A |
| Chunk size=256, Overlap=100 Using SentenceSplitter | 外阴癌手术后局部复发的主要风险因素有哪些？  文档中明确指出了外阴癌手术后局部复发的主要风险因素（基于相似度: 0.482, 0.435, 0.546, 0.435）： - 切缘不足：切缘距肿瘤小于8mm（或少于1cm）是局部复发的最佳预后因素，所有复发病例常与此相关。文档强调切缘应离肿瘤2~3cm以上以降低复发风险。 - 多中心病灶：外阴癌常为多源性（约20%病例可能有复发或新病灶），多中心病灶的存在是复发的一个特点。 - 晚期临床期别：复发与临床期别关系密切，Ⅲ期和IV期病例（如癌灶侵犯尿道、肛门、阴道或全尿道/膀胱）复发风险更高。文档显示，病变累及肛门、阴道、尿道者5年生存率仅22.7%，远低于未累及者的62.6%。 - 首次手术切除不够广泛：如肿瘤接近尿道口或肛门口时，保留器官手术（未辅以放疗）易导致复发。文档提到，1974年前因切除不广泛，复发率达10.4%，改进后降至4.2%。 - 其他因素：年龄（老年妇女风险较高）和肥胖也可能间接影响，但文档未直接列为独立风险因素。 | A | B | A |
| **Question 155: HMB-45和S-100蛋白在诊断外阴恶性黑色素瘤时有何作用？为什么推荐将两者综合运用？** | | | | |
| Chunk size=512, Overlap=0 Using TokenTextSplitter | HMB-45和S-100蛋白在诊断外阴恶性黑色素瘤时有何作用？为什么推荐将两者综合运用？  在诊断外阴恶性黑色素瘤（MM）时，HMB-45和S-100蛋白的作用如下：  - S-100蛋白的作用：几乎所有的恶性黑色素瘤均表达S-100蛋白阳性，具有高敏感性，可用于初步筛查。  - HMB-45的作用：对恶性黑色素瘤的特异性更高，文献报道其在MM中的表达率为90.6%，有助于确诊。  - 推荐综合运用的原因：   - S-100蛋白虽然敏感，但特异性不高，因为肉瘤、神经鞘肿瘤及其他部分癌肿也可能表达阳性，易导致假阳性。   - HMB-45特异性强，但在某些转移性黑色素瘤中可能呈阴性（假阴性风险）。   - 综合运用两者可互补：S-100提高检测灵敏度，HMB-45提高特异性，从而提升诊断准确性，减少误诊。文档指出，这对于鉴别低分化癌或纤维肉瘤等误诊情况尤为重要（来源：[相似度: 0.495]片段中的免疫组化描述）。 | A | A | A |
| Chunk size=256, Overlap=100 Using SentenceSplitter | HMB-45和S-100蛋白在诊断外阴恶性黑色素瘤时有何作用？为什么推荐将两者综合运用？  在提供的文档内容中，没有找到任何关于HMB-45和S-100蛋白的信息。文档讨论了外阴恶性黑色素瘤（如相似度: 0.478, 0.467, 0.513），但仅涉及治疗原则、手术范围和预后，未提及诊断标志物如HMB-45或S-100蛋白的作用或综合运用原因。  回答：在知识库中未找到答案。 | D | D | D |
| **Question 156: 一位68岁的患者，诊断为外阴恶性黑色素瘤，肿瘤位于阴蒂（中心部位）病理报告显示肿瘤厚度为3mm，表面有溃疡。根据本文提供的信息，为她制定一个初步的手术治疗策略（包括局部切除和淋巴结处理），并指出她有哪些预后不良的因素。** | | | | |
| Chunk size=512, Overlap=0 Using TokenTextSplitter | 一位68岁的患者，诊断为外阴恶性黑色素瘤，肿瘤位于阴蒂（中心部位），病理报告显示肿瘤厚度为3mm，表面有溃疡。根据本文提供的信息，为她制定一个初步的手术治疗策略（包括局部切除和淋巴结处理），并指出她有哪些预后不良的因素  初步手术治疗策略（基于文档内容）：  - 局部切除： 文档指出，外阴恶性黑色素瘤的手术范围应根据肿瘤厚度和部位决定。对于肿瘤厚度 >0.76mm（本例为3mm），推荐行局部广泛切除术，切缘距离病灶至少1~2cm（文档来源：[相似度: 0.550] 和 [相似度: 0.497]）。具体策略：行扩大的外阴局部广泛切除术，确保切缘阴性（切缘离病灶 ≥2cm），以避免复发（文档来源：[相似度: 0.575] 和 [相似度: 0.465]）。  - 淋巴结处理： 由于肿瘤位于中心部位（阴蒂），且厚度 >0.76mm（本例为3mm），文档明确推荐行双侧腹股沟淋巴结清扫术（文档来源：[相似度: 0.497]）。原因：中心部位肿瘤易发生双侧淋巴结转移，且厚度 >0.76mm 时，淋巴结转移风险高，清扫可改善预后（文档来源：[相似度: 0.497] 和 [相似度: 0.584]）。如果术中或术前检查发现淋巴结转移证据，应追加盆腔淋巴结清扫（文档来源：[相似度: 0.497]）。  - 总体策略： 先行局部广泛切除（切缘 ≥2cm），同时行双侧腹股沟淋巴结清扫术；术后需密切随访（每3~6个月复查）以监测复发（文档来源：[相似度: 0.575], [相似度: 0.497], 和 [相似度: 0.465]）。  - 预后不良的因素（基于文档内容）：  - 年龄大（68岁）： 文档指出年龄是独立危险因子，年龄大者预后差，76岁以上更易出现不良特征（如血管浸润）（文档来源：[相似度: 0.584]）。  - 肿瘤厚度大（3mm）： 厚度 >3.0mm 的10年生存率仅22%，远低于较薄肿瘤（文档来源：[相似度: 0.575]）。  - 表面溃疡形成： 文档明确将“有无表面溃疡形成”列为预后不良因素，溃疡提示侵袭性强（文档来源：[相似度: 0.584]）。  - 中心部位肿瘤（阴蒂）： 文档指出中心部位肿瘤的预后显著低于两侧部位（文档来源：[相似度: 0.584]）。  - 其他因素： 细胞类型（如结节型生长方式预后差）、淋巴-血管受累等也可能影响预后，但文档未针对本例具体说明（文档来源：[相似度: 0.584]）。 | C | C | C |
| Chunk size=256, Overlap=100 Using SentenceSplitter | 一位68岁的患者，诊断为外阴恶性黑色素瘤，肿瘤位于阴蒂（中心部位），病理报告显示肿瘤厚度为3mm，表面有溃疡。根据本文提供的信息，为她制定一个初步的手术治疗策略（包括局部切除和淋巴结处理），并指出她有哪些预后不良的因素？  回答:  基于文档内容：   手术治疗策略:   - 局部切除: 文档指出外阴恶性黑色素瘤（MM）的首选治疗是手术，手术范围取决于肿瘤厚度和浸润深度。根据NCCN指南和循证医学证据（相似度 0.515）：   - 肿瘤厚度为3mm（>1.0mm且≤4.0mm），推荐扩大切除范围为切缘 2cm（局部广泛切除术）。   - 由于肿瘤位于阴蒂（中心部位），需注意中心部位肿瘤预后较差（相似度 0.675），手术应确保彻底切除。   - 淋巴结处理:   - 肿瘤厚度>0.76mm（ClarkⅢ级）且位于中心部位，应行 双侧腹股沟淋巴结清扫术（相似度 0.515 和 0.457）。   - 文档强调，对于浸润深度>0.76mm的病例，淋巴结清扫可提高生存率（相似度 0.457）。   - 综合建议：行 局部广泛切除术（切缘2cm） + 双侧腹股沟淋巴结清扫术。若术后切缘不净或存在高危因素（如溃疡），可考虑辅助放疗（相似度 0.502）。   预后不良因素:   - 年龄大（68岁）: 年龄是独立危险因子，年龄越大预后越差（相似度 0.675）。   - 中心部位肿瘤: 预后显著低于两侧部位（相似度 0.675）。   - 表面溃疡: 溃疡形成代表肿瘤进展迅速，是复发和生存率低的重要指标，5年生存率仅14.3%~40%（相似度 0.604）。   - 肿瘤厚度>1mm: 厚度>2mm者疗效差（相似度 0.628），且厚度与淋巴结转移率成正比（相似度 0.515）。   - 其他潜在因素: 淋巴转移风险高（相似度 0.604），且溃疡与非正倍体、血管浸润相关（相似度 0.675）。 | B | B | B |
| **Question 157: 外阴黑色素瘤最常见的复发部位是什么？** | | | | |
| Chunk size=512, Overlap=0 Using TokenTextSplitter | 外阴黑色素瘤最常见的复发部位是什么？  回答： 根据文档，外阴黑色素瘤最常见的复发部位是外阴和阴道，其次为腹股沟。具体数据：复发率为51%~93%，最常复发于外阴和阴道（文档来源：[相似度: 0.584]）。 | A | A | A |
| Chunk size=256, Overlap=100 Using SentenceSplitter | 外阴黑色素瘤最常见的复发部位是什么？  回答:  根据文档（相似度 0.675 和 0.551）：  - 最常见复发部位为外阴和阴道，其次为腹股沟。  - 具体描述："最常复发的部位为外阴、阴道,其次为腹股沟"。  - 远处转移常见于肺、骨、肝、脑，但复发以局部（外阴/阴道）为主。 | A | A | A |
| **Question 158: 术前放疗在阴道癌治疗中的主要目的是什么？** | | | | |
| Chunk size=512, Overlap=0 Using TokenTextSplitter | 术前放疗在阴道癌治疗中的主要目的是什么？  回答： 文档中未直接讨论阴道癌的术前放疗目的。文档主要针对外阴癌描述了术前放疗的目的，但阴道癌治疗原理可能类似。基于外阴癌的上下文，术前放疗的主要目的是：使肿瘤缩小、增加活动度，将原本不能切除的肿瘤变为可切除；同时提高手术切缘的彻底性，并尽可能保留邻近器官（如尿道或肛门）的功能（文档来源：[相似度: 0.395]）。由于文档未明确提及阴道癌，此推断基于相似治疗原则。 | B | B | B |
| Chunk size=256, Overlap=100 Using SentenceSplitter | 术前放疗在阴道癌治疗中的主要目的是什么？  回答:  基于文档（相似度 0.429）：  - 术前放疗的主要目的是：   使肿瘤缩小，增加活动度，将原本不能切除的肿瘤变为可手术切除。   提高手术彻底性，确保切缘阴性（离肿瘤≥1cm），避免破坏邻近器官（如尿道、肛门）。   控制镜下区域病变，尤其当腹股沟淋巴结固定或粘连时，放疗可辅助后续手术。  - 典型照射剂量为 25~30Gy/3周，休息2~3周后手术。 | B | B | B |
| **Question 159: 宫颈早期浸润癌的预后良好的主要原因是什么？** | | | | |
| Chunk size=512, Overlap=0 Using TokenTextSplitter | 宫颈早期浸润癌的预后良好的主要原因是什么？  回答： 在知识库中未找到答案。文档主要聚焦于外阴、阴道和黑色素瘤的预后因素，未涉及宫颈早期浸润癌的预后原因。宫颈癌仅在部分片段（如[相似度: 0.517]和[相似度: 0.410]）被简要提及，但未讨论其预后良好的机制。 | D | D | D |
| Chunk size=256, Overlap=100 Using SentenceSplitter | 宫颈早期浸润癌的预后良好的主要原因是什么？  回答:  - 知识库中未找到答案。  - 文档仅在相似度 0.628 提到宫颈早期浸润癌是"介于上皮内瘤和浸润癌之间的一种亚临床癌"，但未解释其预后良好的原因或相关因素。 | D | D | D |
| **Question 160: 对于宫颈早期浸润腺癌的治疗，文本不推荐哪种治疗组合？并给出了什么理由？** | | | | |
| Chunk size=512, Overlap=0 Using TokenTextSplitter | 对于宫颈早期浸润腺癌的治疗，文本不推荐哪种治疗组合？并给出了什么理由？  回答： 在知识库中未找到答案。文档未提供宫颈早期浸润腺癌的具体治疗组合或不推荐方案。宫颈癌治疗仅在[相似度: 0.410]的表格中被提及，但针对的是复发宫颈癌，而非早期浸润腺癌，且未涉及治疗组合的推荐或不推荐理由。 | D | D | D |
| Chunk size=256, Overlap=100 Using SentenceSplitter | 对于宫颈早期浸润腺癌的治疗，文本不推荐哪种治疗组合？并给出了什么理由？  回答:  - 知识库中未找到答案。  - 文档主要讨论外阴癌、阴道癌及黑色素瘤的治疗，未涉及宫颈早期浸润腺癌的具体治疗策略或不推荐的治疗组合。宫颈癌相关内容仅限于分期和手术原则（相似度 0.490），但未针对腺癌亚型或治疗组合进行说明。 | D | D | D |
| **Question 161: 一位42岁的患者，因宫颈病变行冷刀宫颈锥切术。术后病理报告为：宫颈鳞状细胞癌，间质浸润深度2mm，无脉管浸润，无融合生长，但报告明确指出锥切切缘阳性。根据本文信息，下一步最恰当的治疗措施是什么？如果她不愿再做手术，放射治疗是否是合适的替代方案，推荐的放疗方案是什么？** | | | | |
| Chunk size=512, Overlap=0 Using TokenTextSplitter | 一位42岁的患者，因宫颈病变行冷刀宫颈锥切术。术后病理报告为：宫颈鳞状细胞癌，间质浸润深度2mm，无脉管浸润，无融合生长，但报告明确指出锥切切缘阳性。根据本文信息，下一步最恰当的治疗措施是什么？如果她不愿再做手术，放射治疗是否是合适的替代方案，推荐的放疗方案是什么？  回答：  - 下一步最恰当的治疗措施： 根据文档内容，锥切切缘阳性时，即使间质浸润深度≤3mm（本例为2mm，属IA1期）、无脉管浸润和无融合生长，仍应行子宫切除。文档明确指出："锥切切缘阳性者仍应做子宫切除"（相似度0.603片段）。因此，最恰当的治疗是筋膜外全子宫切除术（I型手术），适用于IA1期病例，并切除阴道1～2cm（相似度0.582片段）。  - 放射治疗作为替代方案： 如果患者不愿手术，放射治疗是合适的替代方案，但仅限于有手术禁忌证者。文档提到："有手术禁忌证者可采用放射治疗"（相似度0.497片段）。本例无脉管浸润，属IA期，推荐放疗方案为：   - 单纯腔内照射，A点总剂量60～70Gy（适用于IA期无脉管浸润者）。   - 但由于切缘阳性，可能需更积极治疗；文档未明确切缘阳性时的放疗细节，但一般原则是对于其他IA期病例（如本例有切缘阳性风险），可行腔内照射加盆腔体外照射，A点总剂量75～80Gy（相似度0.497片段）。  - 总结： 首选子宫切除；若不手术，放疗可行，推荐腔内照射（60～70Gy）或加体外照射（75～80Gy），但需评估个体风险。 | C | B | C |
| Chunk size=256, Overlap=100 Using SentenceSplitter | 根据文档内容，患者42岁，宫颈鳞状细胞癌，间质浸润深度2mm（属于FIGO IA期），无脉管浸润和无融合生长，但锥切切缘阳性。文档明确指出："锥切切缘阳性者仍应做子宫切除"（见相似度0.667片段）。因此，下一步最恰当的治疗措施是行子宫切除术（如筋膜外全子宫切除术），以彻底清除病灶，避免复发风险。   如果患者不愿再做手术，放射治疗可以作为替代方案，但需满足手术禁忌证或患者意愿。文档中提到："有手术禁忌证者可采用放射治疗"，并指定了放疗方案（见相似度0.483片段）：  - 对于IA期无脉管浸润者，可行单纯腔内照射，A点总剂量60～70Gy。  - 其他IA期者（包括本例，尽管无脉管浸润，但切缘阳性属于高危因素），可行腔内照射加盆腔体外照射，A点总剂量75～80Gy。  因此，放疗是合适的替代方案，推荐方案为腔内照射加盆腔体外照射，A点总剂量75～80Gy。 | C | C | C |
| **Question 162: 筋膜外全子宫切除术的手术范围包括哪些关键结构？** | | | | |
| Chunk size=512, Overlap=0 Using TokenTextSplitter | 筋膜外全子宫切除术的手术范围包括哪些关键结构？  回答：  根据文档内容，筋膜外全子宫切除术（又称I型或I类扩大子宫切除术）的手术范围包括以下关键结构（相似度0.582和0.690片段）：  - 子宫和宫颈： 完全切除。  - 阴道切缘： 切除阴道1～2cm。  - 韧带处理：   - 主韧带：在子宫和宫颈边缘切断。   - 宫骶韧带：在宫颈边缘切断。  - 邻近器官处理：   - 膀胱：下推至膀胱底（即分离膀胱宫颈间隙，但不涉及膀胱本身）。   - 输尿管：手术中未涉及（仅暴露宫旁段部分，但不分离输尿管床）。   - 直肠：手术中未涉及。  - 卵巢： 选择性切除（根据患者年龄和病情决定是否保留）。  - 其他： 手术范围超过保守性全子宫切除，但不包括盆腔淋巴结切除。   关键点： 该术式在宫颈筋膜外操作，旨在完整切除宫颈，同时最小化泌尿系统并发症。 | A | A | A |
| Chunk size=256, Overlap=100 Using SentenceSplitter | 筋膜外全子宫切除术的手术范围包括以下关键结构（基于多个片段，如相似度0.581、0.500和0.542）：  - 切除全子宫：包括子宫体和宫颈，在宫颈筋膜外操作（即不深入宫旁组织）。  - 切除阴道1～2cm：确保阴道上段被切除，以减少复发风险。  - 切除双侧附件：包括卵巢和输卵管（除非患者年轻需保留卵巢，但文档中一般建议切除）。  - 其他关键操作：让输尿管向旁侧偏离以避免损伤，并切除耻骨宫颈韧带（见相似度0.500片段）。  该术式适用于早期低危病例，如IA期宫颈癌，强调在筋膜外进行，不涉及宫旁组织或淋巴结清扫。 | B | B | B |
| **Question 163: 一位50岁的患者，已绝经，诊断为宫颈早期浸润癌。病理报告显示间质浸润深度为2mm，伴有明确的脉管浸润。根据本文信息，应为她选择哪一型的手术？请描述该手术切除的主要组织范围，并说明其与筋膜外全子宫切除术（I型）的关键区别。** | | | | |
| Chunk size=512, Overlap=0 Using TokenTextSplitter | 一位50岁的患者，已绝经，诊断为宫颈早期浸润癌。病理报告显示间质浸润深度为2mm，伴有明确的脉管浸润。根据本文信息，应为她选择哪一型的手术？请描述该手术切除的主要组织范围，并说明其与筋膜外全子宫切除术（I型）的关键区别  回答：  - 选择的手术类型： II型手术（即II类扩大子宫切除术，国内称子宫次广泛切除术）。文档明确：对于IA1期（间质浸润深度≤3mm，本例为2mm）伴有脉管浸润（LVSI+）者，应行改良根治性子宫切除（即II型手术）加盆腔淋巴结切除术（相似度0.582片段："LVSI(+)时，应行改良根治性子宫切除 + 盆腔淋巴结切除术"）。  - 主要组织切除范围：   - 全子宫切除。   - 切除阴道1～2cm（相似度0.532片段）。   - 切除部分宫旁组织：包括主韧带约1/2（相似度0.527片段："切除主韧带的1/2"）。   - 盆腔淋巴结切除术：常规进行（相似度0.532片段："同时进行盆腔淋巴结切除术"）。   - 其他：暴露宫旁段输尿管，但不广泛分离；不涉及膀胱和直肠深部（相似度0.532片段）。  - 与筋膜外全子宫切除术（I型）的关键区别：   - 宫旁组织切除范围： II型手术切除主韧带1/2和部分宫骶韧带，而I型仅在宫颈边缘切断韧带，不切除宫旁组织（相似度0.582片段：I型"主韧带：在子宫和宫颈边缘切断"）。   - 输尿管处理： II型手术需暴露宫旁段输尿管并将其偏向侧方，而I型手术"输尿管：手术中未涉及"（相似度0.582片段）。   - 淋巴结切除： II型手术常规包括盆腔淋巴结切除术，而I型手术不包括淋巴结切除（相似度0.532片段）。   - 适应证： II型适用于有脉管浸润或更高风险病例（如本例），I型仅适用于低危IA1期无脉管浸润者（相似度0.582片段）。  - 总结： II型手术更广泛，针对脉管浸润风险，增加了宫旁组织和淋巴结切除。 | A | A | A |
| Chunk size=256, Overlap=100 Using SentenceSplitter | 患者50岁，绝经，诊断为宫颈早期浸润癌，间质浸润深度2mm（FIGO IA1期），但伴有明确的脉管浸润。根据文档，脉管浸润是高风险因素，需更积极的手术（见相似度0.477和0.479片段）。  - 应选择的手术类型：II型手术（次广泛子宫切除术，也称为Ⅱ类扩大子宫切除术）。文档指出："适用于浸润深度为3～5mm，或不论其浸润深度如何而伴有脉管浸润者"（相似度0.477片段）。本例浸润深度仅2mm，但脉管浸润存在，因此适用此术式。  - 主要组织范围：   - 切除全子宫及双附件。   - 切除部分宫旁组织，包括子宫骶韧带和主韧带的1/2。   - 切除阴道的1/3（约上段1/3）。   - 暴露宫旁段输尿管，在输尿管内侧断扎子宫动脉（保留输尿管血供）。   - 同时进行选择性盆腔淋巴结清除，包括髂总下段、髂外、腹股沟深、髂内和闭孔区淋巴结（相似度0.477片段）。  - 与筋膜外全子宫切除术（I型）的关键区别：   - I型（筋膜外）：仅切除全子宫、阴道1～2cm和双侧附件，不涉及宫旁组织切除或淋巴结清扫；操作限于筋膜外，输尿管仅被偏离而非解剖（相似度0.500片段）。   - II型（次广泛）：增加了宫旁组织切除（如韧带部分切除）和淋巴结清扫，更激进；需暴露和操作输尿管，但未完全游离；适用于有脉管浸润等高风险病例，以降低转移风险（相似度0.477和0.479片段）。 | A | A | A |
| **Question 164: 一位30岁的患者，有强烈的保留生育功能意愿。宫颈锥切病理证实为宫颈鳞状细胞癌，肿瘤直径1m，间质浸润深度4mm，宽度6mm，切缘阴性且距离病灶10mm，无脉管浸润。腹腔镜探查及盆腔淋巴结冰冻病理显示无转移。根据本文信息，最适合她的手术方式是什么？该手术的关键前提条件是什么？** | | | | |
| Chunk size=512, Overlap=0 Using TokenTextSplitter | 一位30岁的患者，有强烈的保留生育功能意愿。宫颈锥切病理证实为宫颈鳞状细胞癌，肿瘤直径1cm，间质浸润深度4mm，宽度6mm，切缘阴性且距离病灶10mm，无脉管浸润。腹腔镜探查及盆腔淋巴结冰冻病理显示无转移。根据本文信息，最适合她的手术方式是什么？该手术的关键前提条件是什么？  回答：  - 最适合的手术方式： 根治性宫颈切除术加盆腔淋巴结切除术。文档明确：对于IA2期（间质浸润深度3-5mm，本例为4mm）且需保留生育功能者，推荐"根治性宫颈切除术 + 盆腔淋巴结切除术"或类似术式（相似度0.582片段："保留生育功能者可选择：根治性宫颈切除术加盆腔淋巴结切除术"；相似度0.527片段："根治性宫颈切除术加盆腔淋巴结清扫术"）。  - 关键前提条件：   - 肿瘤局限： 肿瘤局限于宫颈，无宫旁浸润或远处转移（相似度0.492片段："肿瘤局限于宫颈，病灶未侵犯宫颈内口"）。   - 切缘阴性： 锥切切缘阴性（本例切缘阴性且距离病灶10mm，符合要求；文档强调切缘阳性需子宫切除，阴性者可保留子宫）。   - 无脉管浸润： 本例无脉管浸润（LVSI-），符合低危特征（相似度0.582片段）。   - 淋巴结无转移： 盆腔淋巴结冰冻病理无转移（文档要求术前评估无淋巴结转移；相似度0.492片段："无淋巴结转移及远处转移"）。   - 生育意愿： 患者有强烈生育愿望，年龄≤45岁（本例30岁，符合；相似度0.492片段："年龄≤45岁，有强烈的生育愿望"）。  - 总结： 该手术切除宫颈及部分阴道上段，保留子宫体，前提是肿瘤局限、切缘阴性、无高危因素（如脉管浸润或淋巴结转移）。 | A | A | A |
| Chunk size=256, Overlap=100 Using SentenceSplitter | 患者30岁，有强烈保留生育功能意愿，病理为宫颈鳞状细胞癌，肿瘤直径1cm（文档中"1m"应为笔误，基于上下文推断为1cm），间质浸润深度4mm（FIGO IA2期），宽度6mm，切缘阴性（距离病灶10mm），无脉管浸润，盆腔淋巴结无转移。  - 最适合的手术方式：根治性宫颈切除术（也称为根治性全宫颈切除）。文档明确提到此术式适用于希望保留生育功能的年轻患者，肿瘤小（直径≤2cm），FIGO IA1～IB2期，无淋巴结转移（见相似度0.519、0.504和0.508片段）。  - 关键前提条件（基于文档总结）：   - 肿瘤特征：局限于宫颈（未侵犯宫颈内口），直径≤2cm（本例为1cm），浸润深度<5mm（本例4mm），切缘阴性（本例符合），无脉管浸润（本例符合），病理类型为鳞癌（本例符合，排除神经内分泌癌等）。   - 转移评估：无淋巴结转移（本例腹腔镜探查及冰冻病理证实），无远处转移（需影像学确认，本例未提及但假设阴性）。   - 患者因素：年龄≤45岁（本例30岁），有强烈生育愿望（本例符合），且能保证随访（见相似度0.508和0.519片段）。   文档强调："根治性宫颈切除术适用于年龄小于40岁，希望保留生育功能，肿瘤小且为外生性的IA1～IIA期宫颈癌病人"（相似度0.519片段），本例完全符合。 | B | B | B |
| **Question 165: 宫颈癌淋巴道转移的主要途径分别是什么？** | | | | |
| Chunk size=512, Overlap=0 Using TokenTextSplitter | 宫颈癌淋巴道转移的主要途径分别是什么？  回答：  根据文档内容，宫颈癌淋巴道转移的主要途径如下（相似度0.471片段）：  - 主要途径： 肿瘤位于子宫下段及宫颈管时，淋巴转移首先向宫旁淋巴结，然后依次至：   - 闭孔淋巴结。   - 髂内淋巴结。   - 髂外淋巴结。   - 髂总淋巴结。   - 最终至腹主动脉旁淋巴结。  - 次要途径： 沿宫骶韧带转移至骶前淋巴结。  - 影响因素： 转移风险与浸润深度（深肌层）、扩散至宫颈管或分化不良相关（相似度0.471片段："当癌瘤浸润至深肌层,或扩散到宫颈管,或癌组织分化不良时,易发生淋巴转移"）。   关键点： 转移途径取决于肿瘤部位，宫颈癌以宫旁→闭孔→髂淋巴结链为主，骶前淋巴结为次要路径。文档未提及其他途径（如腹股沟淋巴结），故不纳入。 | C | C | C |
| Chunk size=256, Overlap=100 Using SentenceSplitter | 宫颈癌淋巴道转移的主要途径如下（基于相似度0.522和0.465片段）：  1. 宫颈旁淋巴结：直接来自宫颈原发灶的淋巴引流。  2. 闭孔淋巴结：常见转移部位，位于闭孔区域。  3. 髂内淋巴结：沿髂内血管分布。  4. 髂外淋巴结：沿髂外血管分布。  5. 髂总淋巴结：位于髂总血管周围。  6. 骶淋巴结：位于骶骨前区域。  7. 腹股沟淋巴结：较少见，但可能通过外阴或阴道下段转移。  文档指出："淋巴道转移是常见的转移途径"，并列出以上路径（相似度0.522片段："1. 宫旁淋巴结；2. 闭孔淋巴结；3. 髂内淋巴结；4. 髂外淋巴结；5. 髂总淋巴结；6. 骶淋巴结；7. 腹股沟淋巴结"）。转移通常按顺序从宫颈旁向盆腔淋巴结扩散。 | A | A | A |
| **Question 166: 对于一位宫颈病灶直径为1cm、病理分级为I级鳞癌、且无脉管间隙侵犯的IB期患者，文本更倾向于推荐哪一类（Type/Class）手术？并解释为什么推荐该手术方式是合理的，以及相比更广泛的手术它有什么优势。** | | | | |
| Chunk size=512, Overlap=0 Using TokenTextSplitter | 对于一位宫颈病灶直径为1cm、病理分级为I级鳞癌、且无脉管间隙侵犯的IB期患者，文本更倾向于推荐哪一类（Type/Class）手术？并解释为什么推荐该手术方式是合理的，以及相比更广泛的手术它有什么优势  推荐的手术类型：II型（Class II）扩大子宫切除术（即子宫次广泛切除术）加盆腔淋巴结切除术。 - 解释合理性：   文档明确指出，对于IB期宫颈癌患者，如果肿瘤为鳞癌I级或II级、直径≤2cm且无脉管浸润，II型手术是合理的首选方案（见上下文片段1："适应证：已有学者推荐，对于宫颈鳞癌I、Ⅱ级，肿瘤直径小于或等于2cm，无脉管浸润的病人，可行子宫次广泛切除术和盆腔淋巴结切除术"）。本例患者病灶直径为1cm（小于2cm）、病理I级、无脉管侵犯，完全符合II型手术的适应证。文档强调，这种选择基于个体化原则，旨在降低手术并发症而不影响治疗效果（片段1："笔者认为，根据病人的自身情况和病情选择手术方式是十分合理的。子宫次广泛切除术较子宫广泛切除术的损伤小，并发症少"）。  - 相比更广泛手术（如III型手术）的优势：   - 生存率相当： 文档显示，II型手术的5年生存率与III型手术无统计学差异（片段2："前者5年生存率100%，无瘤生存率98.33%，后者5年生存率100%，无瘤生存率97.2%，两组无统计学差异(P=0.779)"）。   - 手术并发症显著减少： II型手术损伤更小，导致泌尿道并发症（如输尿管瘘）发生率低（片段2："前者术后并发症明显低于后者"），具体表现为手术时间短、术中失血量少、术后住院时间短（片段2："前者手术时间、术后住院时间、术中失血量与后者比较有统计学差异(P值分别为0.0001,0.0001,0.001)"）。   - 生活质量提高： 保留更多宫旁组织有助于膀胱功能恢复，减少术后感染和功能障碍风险（片段2："对这类病人手术保留一些宫旁组织，必然会大大降低泌尿道并发症发生率"）。   总之，II型手术在保证同等疗效（5年生存率100%）的前提下，显著降低了手术风险和术后并发症，更适合本例低危患者。 | A | A | A |
| Chunk size=256, Overlap=100 Using SentenceSplitter | 对于一位宫颈病灶直径为1cm、病理分级为I级鳞癌、且无脉管间隙侵犯的IB期患者，文本更倾向于推荐哪一类（Type/Class）手术？并解释为什么推荐该手术方式是合理的，以及相比更广泛的手术它有什么优势  推荐手术类型： Ⅱ型（Class II）扩大子宫切除术（即子宫次广泛切除术）加盆腔淋巴结切除术。 - 解释合理性：   - 文档明确指出，对于宫颈鳞癌I级（病理分级为I级）、肿瘤直径≤2cm、无脉管浸润的IB期患者，Ⅱ型手术是合适的适应证。例如，上下文提到："对于宫颈鳞癌I、Ⅱ级，肿瘤直径小于或等于 $2\mathrm{cm}$ ，无脉管浸润的病人，可行子宫次广泛切除术和盆腔淋巴结切除术。" 和 "宫颈肿瘤直径小于或等于 $2\mathrm{cm}$ ，无脉管间隙侵犯者，可以采用Ⅱ型手术（含盆腔淋巴结切除），而不必行子宫广泛切除（Ⅲ型手术），同样可获得长期无癌生存。" 患者的病灶直径为1cm（小于2cm）、I级鳞癌、无脉管侵犯，完全符合这些条件。  - 合理性基于临床数据和专家观点：文档显示，这类"低危"IB期患者的盆腔淋巴结转移率低（0-14%），且生存率高（5年生存率可达100%）。例如，漆林涛等报道75例类似患者行Ⅱ型手术，盆腔淋巴结转移率仅4%，5年生存率100%；Kinney研究也证实肿瘤直径≤2cm、无脉管侵犯者行Ⅱ型手术后均长期存活。因此，在不影响治疗效果的前提下，推荐Ⅱ型手术是合理的个体化选择。 - 相比更广泛手术（如Ⅲ型手术）的优势：  - 损伤小、并发症少： Ⅱ型手术切除范围较Ⅲ型手术（子宫广泛切除术）小，不涉及广泛游离输尿管床或切除全部主韧带，因此手术损伤更轻。文档强调："子宫次广泛切除术较子宫广泛切除术的损伤小，并发症少。" 具体优势包括：  - 降低泌尿系并发症： Ⅲ型手术的泌尿系并发症率较高（如膀胱功能障碍达28%），而Ⅱ型手术可显著减少此类风险（文档提到Ⅱ型手术的泌尿系并发症为13% vs Ⅲ型的28%）。  - 减少术中失血量和手术时间： 数据比较显示，Ⅱ型手术平均失血量少、手术时间短（例如，文档中Ⅱ型手术时间135分钟 vs Ⅲ型180分钟），术后住院时间也更短。  - 提高生活质量： 由于并发症少，患者术后恢复更快，生活质量更高。文档指出："在不影响治疗效果的前提下，为了降低手术并发症，提高生活质量，对某些IB期病人是否可以选择Ⅱ型手术？" 并证实生存率无差异（Ⅱ型5年生存率100% vs Ⅲ型100%），但Ⅱ型在手术相关指标上更优。  - 等效生存率： 文档多次强调，对于符合指征的患者，Ⅱ型手术的生存率与更广泛的Ⅲ型手术相当（如"两组无统计学差异"），因此无需过度扩大手术范围。 | A | A | A |
| **Question 167: 腹膜内（后）盆腔淋巴组织切除和子宫广泛切除术术后引流管的放置位置是什么？** | | | | |
| Chunk size=512, Overlap=0 Using TokenTextSplitter | 腹膜内（后）盆腔淋巴组织切除和子宫广泛切除术术后引流管的放置位置是什么？  放置位置：闭孔区，经阴道引出。   文档在描述盆腔淋巴结切除和子宫广泛切除术后的引流管理时明确指出，引流管放置在闭孔区，并通过阴道引出（见上下文片段："于闭孔区内置入橡皮引流管，经阴道引出" 和 "术毕消毒后取出阴道内纱布及理顺引流管"）。这适用于腹膜内盆腔淋巴组织切除和子宫广泛切除术（如II型或III型手术），目的是引流术后积液，减少感染风险。文档未提及其他放置位置（如腹部），因此基于上下文，此为标准做法。 | B | B | B |
| Chunk size=256, Overlap=100 Using SentenceSplitter | 腹膜内（后）盆腔淋巴组织切除和子宫广泛切除术术后引流管的放置位置是什么？  放置位置： 引流管通常放置在阴道残端或盆腔腹膜外。 - 解释：   - 文档在描述子宫广泛切除术（如Ⅲ型手术）的术后处理时提到："缝合阴道残端边缘一周，间断“8”字缝合关闭残端，中间留孔置T形管引流用。" 这表明引流管通过阴道残端的预留孔放置，以引流盆腔积液。  - 此外，文档还提到腹膜外引流："术后腹膜外负压引流可较好地保持无菌状态,使引流通畅..." 这适用于盆腔淋巴结切除术后，引流管放置在腹膜外间隙，以减少感染和淋巴囊肿风险。  - 注意：文档指出引流并非绝对必要，部分学者建议减少或不引流以避免并发症，但标准做法是放置于上述位置。 | B | B | B |
| **Question 168: 请简述Ⅲ型扩大子宫切除术中，手术中断扎子宫动脉的标准位置在何处？** | | | | |
| Chunk size=512, Overlap=0 Using TokenTextSplitter | 请简述Ⅲ型扩大子宫切除术中，手术中断扎子宫动脉的标准位置在何处？  断扎位置：在髂内动脉起始处。   文档在描述III型扩大子宫切除术（即标准根治性子宫切除术）的手术方法时明确指定了子宫动脉的断扎位置（见上下文片段："在髂内动脉起始处断扎子宫动脉（图7-12）"）。这一位置是为了确保广泛切除宫旁组织，同时减少输尿管损伤风险。文档未提及其他位置，因此此为标准操作。 | A | A | A |
| Chunk size=256, Overlap=100 Using SentenceSplitter | 请简述Ⅲ型扩大子宫切除术中，手术中断扎子宫动脉的标准位置在何处？  断扎位置： 在输尿管隧道处或膀胱子宫韧带区域。 - 简述：   - 文档描述Ⅲ型手术范围时提到："输尿管：分离输尿管隧道" 和 "处理膀胱子宫韧带后层血管群"。在游离输尿管隧道的过程中，子宫动脉需被断扎，标准位置位于输尿管与子宫动脉交叉的隧道区域。具体而言，手术需分离膀胱子宫韧带后层，暴露并结扎子宫动脉，以确保彻底切除宫旁组织。文档虽未给出精确解剖坐标，但基于上下文（如"切离膀胱子宫韧带后层"），断扎点通常在输尿管进入膀胱前的隧道段。 | D | D | D |
| **Question 169: Ⅲ型扩大子宫切除术中游离输尿管隧道时如何处理膀胱宫颈韧带？** | | | | |
| Chunk size=512, Overlap=0 Using TokenTextSplitter | Ⅲ型扩大子宫切除术中游离输尿管隧道时如何处理膀胱宫颈韧带？  处理方式：将输尿管从膀胱宫颈韧带中完整解剖出来，仅保留韧带侧方一小部分（自输尿管下端至膀胱上动脉），以保留远端输尿管的血液供应。   文档详细描述了III型手术中输尿管隧道的处理（见上下文片段："输尿管从膀胱宫颈韧带中完整地解剖出来，直至进入膀胱处，仅保留该韧带侧方自输尿管下端至膀胱上动脉的一小部分（图7-13），以保留远端输尿管的若干血液供应，减少瘘管形成的危险"）。这种方法旨在彻底切除癌变组织的同时，避免输尿管缺血导致的并发症（如瘘管）。文档未提及其他处理方式，因此此为标准技巧。 | B | B | B |
| Chunk size=256, Overlap=100 Using SentenceSplitter | Ⅲ型扩大子宫切除术中游离输尿管隧道时如何处理膀胱宫颈韧带？  处理方式： 分离和切离膀胱宫颈韧带的后层，并处理其血管群。 - 简述：   - 文档详细描述："分离和切离膀胱子宫韧带后层"、"处理膀胱子宫韧带后层血管群" 和 "切离膀胱子宫韧带后层"。在游离输尿管隧道时，手术需先暴露阴道侧间隙和膀胱上静脉，然后分离韧带后层，结扎或电凝其血管群（如子宫深静脉），最后切离韧带后层组织。这确保了输尿管完全游离，同时减少出血风险。文档强调此步骤是Ⅲ型手术的关键，以广泛切除宫旁组织。 | C | C | C |
| **Question 170: 经阴道广泛性子宫切除术及盆腔淋巴结切除术中，阴道切缘的要求是什么？** | | | | |
| Chunk size=512, Overlap=0 Using TokenTextSplitter | 经阴道广泛性子宫切除术及盆腔淋巴结切除术中，阴道切缘的要求是什么？  阴道切缘要求：切除阴道1/2（约3.5-4.5cm），且切缘距离病灶不少于2cm。   文档在描述经阴道广泛性子宫切除术（如III型手术）时多次强调阴道切除范围（见上下文片段："切除阴道1/2（图7-16）" 和 "切除阴道的1/2"）。同时，文档指出，阴道切缘必须距离病灶至少2cm以确保阴性切缘，降低复发风险（片段："手术切缘距病灶近或切缘阳性者术后复发率高，特别是后者，5年生存率减至50%。因此，切除足够的阴道长度很有必要，特别是ⅡA期病人，阴道切缘距离病灶不应少于2cm"）。对于IB期患者，文档建议避免千篇一律切除过多（如>2cm），但最低要求是不少于2cm（片段："但千篇一律切除阴道的1/2(3.5~4.5cm)实属不必要，特别是I B期病人"）。在经阴道手术部分，文档未指定不同数值，因此基于整体上下文，切除1/2阴道（对应约3.5-4.5cm）且距离病灶≥2cm是标准要求。  # | A | A | A |
| Chunk size=256, Overlap=100 Using SentenceSplitter | 经阴道广泛性子宫切除术及盆腔淋巴结切除术中，阴道切缘的要求是什么？  阴道切缘要求： 切除阴道上1/2或距离病灶至少2cm。 - 解释：   - 文档在描述经阴道广泛性子宫切除术时明确："阴道切除须达1/2（离病灶 $2\mathrm{cm}$）"。例如，上下文提到："切除阴道 $2\sim 3\mathrm{cm}$" 或 "如为ⅡA期病人阴道的切缘距阴道病灶不少于 $2\mathrm{cm}$"。这确保了足够的切除范围以降低复发风险。文档还强调，切除不足（如切缘<2cm）可能增加复发率，因此要求严格遵循此标准。  # | C | C | C |
| **Question 171: 根治性宫颈切除术中保留子宫动脉上行支的目的是什么？** | | | | |
| Chunk size=512, Overlap=0 Using TokenTextSplitter | 根治性宫颈切除术中保留子宫动脉上行支的目的是什么？  在根治性宫颈切除术中保留子宫动脉上行支的主要目的是确保子宫体的充足血供，以维持子宫内膜的健康和功能，从而支持未来的妊娠能力。文档明确指出，保留子宫动脉上行支可以避免子宫肌层和内膜缺血坏死，影响胚胎着床，并保证与卵巢血管的沟通不受干扰。具体来说： - 文档片段（相似度: 0.555）提到："保留子宫动脉上行支不仅保留了子宫的血管，也保证了和卵巢的血管沟通不受影响。血供减少，不仅影响子宫肌层，对内膜也有影响，对妊娠也有影响。" - 此外，片段（相似度: 0.528）补充："保留子宫动脉上行支的出发点，即保留子宫体的血供...因为其宫体血供可以影响妊娠，血供不好子宫内膜有可能缺血坏死，以后胚胎的着床也会受到影响。"  因此，保留子宫动脉上行支是为了优化生育功能保留，减少术后不孕或流产的风险。  # | A | A | A |
| Chunk size=256, Overlap=100 Using SentenceSplitter | 根治性宫颈切除术中保留子宫动脉上行支的目的是什么？  在根治性宫颈切除术中保留子宫动脉上行支的主要目的是保留子宫体的血供，以支持生育能力和妊娠。根据文档内容，血供减少会影响子宫肌层和内膜，进而影响妊娠结局。保留子宫动脉上行支不仅确保了子宫的血管供应，还维持了与卵巢血管的沟通，从而减少对生育功能的负面影响（例如，避免子宫内膜缺血坏死和胚胎着床问题）。文档明确指出，这一操作有助于维持妊娠至足月，并减少流产风险（例如，在[相似度: 0.521]部分提到：“血供减少，不仅影响子宫肌层，对内膜也有影响，对妊娠也有影响，所以手术应考虑保留子宫动脉的上行支以保留子宫体的血供...保留子宫动脉上行支不仅保留了子宫的血管，也保证了和卵巢的血管沟通不受影响”）。  # | A | B | A |
| **Question 172: 请简述经腹根治性宫颈切除术中骶骨韧带的处理步骤。** | | | | |
| Chunk size=512, Overlap=0 Using TokenTextSplitter | 请简述经腹根治性宫颈切除术中骶骨韧带的处理步骤  在经腹根治性宫颈切除术中，骶骨韧带（即宫骶韧带）的处理步骤包括分离直肠侧间隙和直肠阴道间隙，以确保安全切除韧带组织。文档详细描述了该过程： - 步骤A: 分离直肠侧间隙：首先打开右侧的直肠侧间隙，暴露输尿管和下腹下丛神经，并保留这些神经。同样地，在左侧重复此操作，切开侧腹膜至直肠边缘，识别输尿管和漏斗韧带（相似度: 0.543）: "A. 分离直肠侧间隙：打开右侧的直肠侧间隙（图7-103），其外侧是输尿管，在直肠侧间隙输尿管下1cm的外侧可以看到下腹下丛神经，把这些神经予保留。同样紧贴腹膜打开左侧的直肠侧间隙，把输尿管往外侧分离，切除部分腹膜。切开侧腹膜至直肠边缘，此时可以看见侧腹膜下方的直肠，还有漏斗韧带和输尿管。" - 步骤B: 分离直肠阴道间隙：在子宫直肠窝处用电刀切开子宫直肠反折腹膜，然后钝性分离直肠阴道间隙，以充分暴露骶骨韧带便于切除（相似度: 0.543）: "B. 分离直肠阴道间隙：直肠侧间隙打开后打开直肠阴道间隙，在子宫直肠窝处组织疏松的地方用电刀切开子宫直肠反折腹膜（图7-104），用手指钝性分离直肠阴道间隙。"  这些步骤旨在安全解剖骶骨韧带区域，减少损伤邻近结构（如输尿管和神经）的风险，并为后续切除做准备。  # | C | C | C |
| Chunk size=256, Overlap=100 Using SentenceSplitter | 请简述经腹根治性宫颈切除术中骶骨韧带的处理步骤  在知识库中未找到答案。  文档中多次提到经腹根治性宫颈切除术的步骤（例如，在[相似度: 0.525]和[相似度: 0.521]部分），但仅简要提及“骶骨韧带的处理”作为手术技巧的一部分，没有提供具体的处理步骤细节（如分离、切断或缝合方法）。文档重点描述了其他结构（如主韧带、输尿管和阴道）的处理，但骶骨韧带的详细操作未被明确说明。因此，基于提供的上下文，无法给出具体步骤。  # | D | D | D |
| **Question 173: 请简述IV型扩大子宫切除术与III型的主要区别。** | | | | |
| Chunk size=512, Overlap=0 Using TokenTextSplitter | 请简述IV型扩大子宫切除术与III型的主要区别  IV型扩大子宫切除术（Class IV）与III型（Class III）的主要区别在于手术范围更广泛，涉及输尿管、血管和阴道的处理。文档明确列出了三点关键差异（相似度: 0.519）: 1. 输尿管处理：IV型手术完全从耻骨膀胱韧带中解剖出输尿管，并切除所有输尿管旁组织，而III型仅部分解剖输尿管，保留部分组织以减少瘘管风险。 2. 血管处理：IV型手术不保留膀胱上动脉，而III型会保留该动脉以维持远端输尿管血供。 3. 阴道切除范围：IV型切除阴道上3/4，而III型切除阴道约1/2（如片段所示："切除阴道1/2"）。  此外，文档强调IV型适用于放疗后前部中心复发或宫旁组织广泛受累的情况，但会增加瘘孔风险（相似度: 0.519）: "IV型手术主要应用于放疗后前部中心复发有可能保留膀胱功能者...由于结扎支配膀胱的血管，会显著地增加瘘孔形成的危险。"  # | B | A | A |
| Chunk size=256, Overlap=100 Using SentenceSplitter | 请简述IV型扩大子宫切除术与III型的主要区别  IV型扩大子宫切除术与III型的主要区别在于手术范围更广泛，特别针对中心复发累及宫旁组织但仍可保留膀胱的情况。根据文档内容：  - III型（Meigs手术）：切除全部主韧带及骶韧带、阴道上1/2，适用于IB期及IIA期宫颈癌（在[相似度: 0.539]部分提到：“Ⅲ类：切除全部主韧带及骶韧带、阴道上1/2”）。  - IV型：在III型基础上，进一步切除输尿管周围全部组织、沿盆壁切除髂内动脉及宫旁组织，并更广泛地切除阴道周围组织（切除阴道3/4）。这适用于中心复发累及宫旁组织但未累及膀胱或直肠的病例（在[相似度: 0.511]部分提到：“当中心复发累及宫旁组织，仍可保留膀胱时，应将输尿管从宫颈膀胱韧带中完全解剖出来，切除输尿管周围全部组织。同时沿盆壁切除髂内动脉及宫旁组织，更广泛地切除阴道周围组织，阴道切除 $3 / 4$ 。这比Ⅱ、Ⅲ型手术范围大，称Ⅳ型扩大子宫切除术”）。  主要区别是IV型增加了对输尿管、髂内动脉和更多阴道组织的切除，以处理更广泛的复发灶。  # | A | A | A |
| **Question 174: 剖宫产后放疗未得到控制的宫颈癌病人应采用哪些手术方式？** | | | | |
| Chunk size=512, Overlap=0 Using TokenTextSplitter | 剖宫产后放疗未得到控制的宫颈癌病人应采用哪些手术方式？  在提供的文档中，没有直接提及"剖宫产后放疗未得到控制"的具体情况。文档讨论了放疗后复发或未控制宫颈癌的手术治疗（例如，片段相似度: 0.513 提到放疗后复发者可选择根治性子宫切除术或盆腔脏器切除术），但没有针对剖宫产后这一特定场景的信息。搜索关键词如"剖宫产"、"产后"等也未在上下文出现。  因此，在知识库中未找到答案。建议参考更广泛的临床指南或咨询专业肿瘤委员会。  # | D | D | D |
| Chunk size=256, Overlap=100 Using SentenceSplitter | 剖宫产后放疗未得到控制的宫颈癌病人应采用哪些手术方式？  剖宫产后放疗未得到控制的宫颈癌病人应采用筋膜外子宫切除或子宫次广泛切除加选择性盆腔淋巴结清扫的手术方式。根据文档内容，如果术中探查发现腹主动脉旁淋巴结阳性，还需追加腹主动脉旁淋巴结照射（在[相似度: 0.525]部分明确提到：“剖宫产后经全量放疗后未控病人, 可行筋膜外子宫切除或子宫次广泛切除及选择性盆腔淋巴结清扫切除。如术中探查腹主动脉旁淋巴结阳性者, 追加腹主动脉旁淋巴结照射”）。这些手术方式旨在切除残留病灶，同时评估淋巴结状态以指导后续治疗。  # | A | A | A |
| **Question 175: 若患者怀孕期间确诊宫颈浸润癌，在那些情况下应立即终止妊娠？** | | | | |
| Chunk size=512, Overlap=0 Using TokenTextSplitter | 若患者怀孕期间确诊宫颈浸润癌，在那些情况下应立即终止妊娠？  在提供的文档中，没有明确列出怀孕期间确诊宫颈浸润癌后立即终止妊娠的具体条件。文档提到"合并妊娠者"作为手术指征的一部分（相似度: 0.467）: "凡属IB期及ⅡA期的病人，若有如下情况，应首先考虑手术根治：... (4) 合并妊娠者。" 但这仅表示妊娠是手术适应症，并未详细说明何时必须终止妊娠。其他片段（如相似度: 0.585）也重复了此点，但无进一步细节。  因此，在知识库中未找到答案。实际决策应基于癌症分期、妊娠周数、患者意愿等综合因素，并遵循临床实践指南。 | D | D | D |
| Chunk size=256, Overlap=100 Using SentenceSplitter | 若患者怀孕期间确诊宫颈浸润癌，在那些情况下应立即终止妊娠？  在知识库中未找到答案。  文档中多次讨论妊娠期宫颈浸润癌的处理（例如，在[相似度: 0.525]部分提到：“浸润癌妊娠期确诊为宫颈浸润癌, 应考虑终止妊娠并进行手术或放疗”），但未明确列出“立即终止妊娠”的具体条件（如特定分期、症状或孕周）。文档仅泛指出应根据妊娠期早晚、病变严重程度和病人意愿决定，例如在早期妊娠一般建议终止，晚期可能延迟至胎儿存活（在[相似度: 0.525]部分：“在妊娠早期, 先行放疗, 待胎儿自然流产...在妊娠中、末期, 原则上不管胎儿有无存活能力, 都应行古典式剖宫产终止妊娠”），但未定义“立即”的触发条件（如病变进展或高危因素）。因此，基于提供的上下文，无法提取具体情形列表。 | D | D | D |
| **Question 176: 在子宫内膜癌手术中，需要进行腹膜后淋巴结活检的具体指征有哪些？** | | | | |
| Chunk size=512, Overlap=0 Using TokenTextSplitter | 在子宫内膜癌手术中，需要进行腹膜后淋巴结活检的具体指征有哪些？  根据文档内容，子宫内膜癌手术中进行腹膜后淋巴结活检的具体指征包括：  - 肌层浸润深度大于1/2（不考虑肿瘤分级）。  - 肿瘤侵及宫颈-峡部（即宫颈或峡部受累）。  - 附件转移或其他子宫外转移。  - 特定组织学类型：浆液性腺癌、透明细胞腺癌、鳞状细胞癌或未分化癌。  - 淋巴结肿大（通过触诊或影像学检查发现）。  - 可疑的腹主动脉旁及髂总淋巴结、大块附件病灶或增大的盆腔淋巴结（尤其对于透明细胞癌、浆液性乳头状癌等亚型）。  这些指征来源于文档中表8-7及相关描述（例如，在“取样的指征”部分和“手术探查及手术分期的步骤”部分），目的是识别高风险病例以指导术后辅助治疗。 | A | A | A |
| Chunk size=256, Overlap=100 Using SentenceSplitter | 在子宫内膜癌手术中，需要进行腹膜后淋巴结活检的具体指征有哪些？  根据文档内容，需要进行腹膜后淋巴结活检的具体指征包括： - 深肌层浸润：任何深肌层浸润（特别是浸润肌层全层）是评估腹膜后淋巴结的明确指征。 - 影像学检查提示淋巴结阳性：如影像学显示淋巴结增大或可疑转移。 - 可疑淋巴结：包括可疑的腹主动脉旁及髂总淋巴结，或增大的盆腔淋巴结。 - 附件病灶：大块附件病灶（如大块卵巢或输卵管转移）。 - 组织学特征：  - 低分化肿瘤（G3级），尤其浸润肌层全层时。  - 特定组织学亚型，如透明细胞癌、浆液性乳头状癌及癌肉瘤。 - 其他高危因素：如盆腔淋巴结转移、附件转移、腹腔内转移或肿瘤侵犯肌层外1/3（基于FIGO指南和风险因素分析）。  这些指征来源于文档中多个片段（例如，相似度0.661和0.657的片段），强调了淋巴结活检用于评估预后和指导后续治疗。 | C | C | C |
| **Question 177: 子宫内膜癌的基本术式是什么？** | | | | |
| Chunk size=512, Overlap=0 Using TokenTextSplitter | 子宫内膜癌的基本术式是什么？  根据文档内容，子宫内膜癌的基本术式为“筋膜外全子宫加双附件切除术”。  - 该术式包括在宫颈筋膜外行全子宫切除，同时切除阴道1~2 cm及双侧附件（输卵管和卵巢）。  - 适应证主要适用于I期低危病人，具体条件包括：1级或2级病变且肌层浸润小于1/3；3级病变无肌层浸润；无宫颈及峡部受累；无淋巴结受累；无腹腔内转移。  这一信息在多个片段中被明确提及（例如，在“手术方式、方法及适应证”部分和“手术探查及手术分期的步骤”部分），是子宫内膜癌手术治疗的核心标准术式。 | B | A | A |
| Chunk size=256, Overlap=100 Using SentenceSplitter | 子宫内膜癌的基本术式是什么？  根据文档内容，子宫内膜癌的基本术式是筋膜外全子宫加双附件切除术。  - 手术范围：在宫颈筋膜外行全子宫切除，同时切除双侧附件（卵巢和输卵管），以及阴道上段1-2 cm（如相似度0.574和0.582的片段所述）。 - 适应证：主要适用于早期（I期）低危病人，特别是无深肌层浸润、无宫颈受累、无淋巴结转移的病例（如相似度0.547的片段提到）。  文档明确将此术式描述为“基本手术”（相似度0.661片段），并多次在上下文（如相似度0.657和0.582）中强调其作为标准治疗的基础。 | A | A | A |
| **Question 178: 在进行筋膜外全子宫切除术分离膀胱瓣时，为什么充分展开膀胱柱这一解剖结构至关重要？这一操作如何帮助术者避免损伤输尿管？** | | | | |
| Chunk size=512, Overlap=0 Using TokenTextSplitter | 在进行筋膜外全子宫切除术分离膀胱瓣时，为什么充分展开膀胱柱这一解剖结构至关重要？这一操作如何帮助术者避免损伤输尿管？  在知识库中未找到答案。  - 文档中多次提及“分离膀胱”或“剥离膀胱”的操作（例如，在描述筋膜外全子宫切除术步骤时），但未具体提到“膀胱柱”这一解剖结构或相关解释。  - 文档强调了避免输尿管损伤的重要性（如“识别输尿管后高位断扎卵巢血管”或“分离输尿管时注意保护其表面鞘膜”），但未涉及“膀胱柱”在避免损伤中的作用。因此，无法基于提供的上下文回答此问题。 | D | D | D |
| Chunk size=256, Overlap=100 Using SentenceSplitter | 在进行筋膜外全子宫切除术分离膀胱瓣时，为什么充分展开膀胱柱这一解剖结构至关重要？这一操作如何帮助术者避免损伤输尿管？  在知识库中未找到答案。  - 文档中多次描述了筋膜外全子宫切除术的步骤，包括分离膀胱瓣（如“分离宫颈膀胱间隙至前穹隆处”和“暴露宫颈筋膜”），但未提及“膀胱柱”这一特定解剖结构。文档强调了避免损伤输尿管的一般原则（如“分离膀胱浆膜时须紧靠浆膜面进行,避免损伤膀胱和减少出血”），但没有具体解释“膀胱柱”的作用或如何通过展开它来避免输尿管损伤。因此，无法基于提供的上下文回答此问题。 | D | D | D |
| **Question 179: 在经直接切口（非侧方入路）切除左侧腹主动脉旁淋巴结时，该区域淋巴结的位置有何特殊性？并强调了在操作中为避免何种严重并发症，需如何操作？** | | | | |
| Chunk size=512, Overlap=0 Using TokenTextSplitter | 在经直接切口（非侧方入路）切除左侧腹主动脉旁淋巴结时，该区域淋巴结的位置有何特殊性？并强调了在操作中为避免何种严重并发症，需如何操作？  根据文档内容：  - 淋巴结位置的特殊性：左侧腹主动脉旁淋巴结位于腹主动脉左侧，位置较深且操作空间受限（与右侧相比，右侧淋巴结多覆盖在下腔静脉上）。文档指出，直接切口入路（非侧方）切除左侧淋巴结时，暴露困难，因为左侧淋巴结紧贴腹主动脉左侧，且需处理腹膜后间隙的复杂解剖（如输尿管和卵巢血管的走行）。  - 需避免的严重并发症：操作中需避免血管撕裂导致的严重出血，特别是“伴随静脉”（恒定的小静脉于前方进入下腔静脉或腹主动脉）被意外撕裂。  - 操作要求：为预防出血并发症，术者必须仔细识别输尿管和血管走向，预先结扎“伴随静脉”；同时，松动十二指肠（剪开其两侧腹膜）以改善暴露，并在头侧切除时轻柔操作，使用止血钳分离组织蒂。文档强调，在直接切口入路中，左侧淋巴结切除通常较右侧更复杂，建议经侧方入路辅助（但问题指定非侧方入路，因此直接入路需额外谨慎）。  这些信息来源于“腹主动脉旁淋巴结切除”的描述（例如，在“手术方法与技巧”部分），其中详细说明了技术细节和风险。 | C | C | C |
| Chunk size=256, Overlap=100 Using SentenceSplitter | 在经直接切口（非侧方入路）切除左侧腹主动脉旁淋巴结时，该区域淋巴结的位置有何特殊性？并强调了在操作中为避免何种严重并发症，需如何操作？  根据文档内容： - 淋巴结位置的特殊性：左侧腹主动脉旁淋巴结位于腹主动脉左侧及前方，但由于解剖结构（如腹主动脉位置较深且靠近中线），暴露较为困难。文档指出，直接切口入路（非侧方）在左侧操作时，暴露左侧腹主动脉旁淋巴结有挑战性，因为主动脉位置可能遮挡视野，且淋巴结常与腹主动脉和左侧输尿管紧密相邻（相似度0.474片段）。 - 需避免的严重并发症：操作中需避免损伤输尿管和血管（如腹主动脉或髂血管），因为输尿管位于淋巴结区域附近，误伤可导致尿漏、出血或肾功能损害。 - 操作强调：  - 识别并保护输尿管：在切开腹膜后，需先识别输尿管和卵巢血管，并将其轻柔拉向侧方（远离操作区域），以减少损伤风险（如相似度0.474片段所述：“识别输尿管和卵巢血管后将其拉向侧方”）。  - 谨慎解剖：从尾侧向头侧逐步解剖（如从髂总动脉起始处向上），避免在血管后方或大血管之间过度分离，以减少出血风险（相似度0.474和0.499片段）。  这些信息来源于相似度0.474的片段，描述了经直接切口切除腹主动脉旁淋巴结的技术细节和风险控制。 | C | C | C |
| **Question 180: 在IV期卵巢癌手术中，残余肿瘤直径小于多少厘米被认为是最佳减灭术的标准？** | | | | |
| Chunk size=512, Overlap=0 Using TokenTextSplitter | 在IV期卵巢癌手术中，残余肿瘤直径小于多少厘米被认为是最佳减灭术的标准？  根据文档内容，在IV期卵巢癌手术中，残余肿瘤直径小于或等于2 cm被认为是最佳减灭术（理想肿瘤细胞减灭术）的标准。  - 文档明确说明：“术后残余肿瘤直径小于或等于2 cm者称理想肿瘤细胞减灭术”，并指出这一标准能显著改善生存率（例如，在“晚期(Ⅲ、IV期)癌首次肿瘤细胞减灭术”部分）。  - 残余肿瘤直径大于2 cm则被视为次最佳减灭术，预后较差。这一标准基于临床研究数据，用于评估手术效果和指导术后治疗。 | A | A | A |
| Chunk size=256, Overlap=100 Using SentenceSplitter | 在IV期卵巢癌手术中，残余肿瘤直径小于多少厘米被认为是最佳减灭术的标准？  根据文档内容，在IV期卵巢癌手术中，残余肿瘤直径小于或等于2 cm被认为是最佳减灭术（理想肿瘤细胞减灭术）的标准。  - 文档明确表述：“术后残余肿瘤直径小于或等于 $2\mathrm{cm}$ 者称理想肿瘤细胞减灭术”（相似度0.582片段）。 - 这一标准在多个片段中被强调（如相似度0.472和0.485片段），适用于晚期卵巢癌（III-IV期）手术，目标是最大限度切除肿瘤以提高生存率。 | A | A | A |
| **Question 181: 根据Heintz等人的报道，大约50%的肿瘤细胞减灭术为次最佳减灭术。这些手术失败的主要原因是什么？请列出导致手术无法达到最佳减灭效果的、位于上腹部的具体解剖部位。** | | | | |
| Chunk size=512, Overlap=0 Using TokenTextSplitter | 根据Heintz等人的报道，大约50%的肿瘤细胞减灭术为次最佳减灭术。这些手术失败的主要原因是什么？请列出导致手术无法达到最佳减灭效果的、位于上腹部的具体解剖部位。  失败主要原因：根据文档内容，手术失败的主要原因是上腹部存在无法切除的残留病灶（直径大于2 cm），这些病灶位置深在、粘连严重或涉及关键器官，导致手术无法达到最佳减灭效果（即残余肿瘤直径 ≤ 2 cm）。  - 位于上腹部的具体解剖部位：文档明确指出，这些残留病灶主要位于上腹部的以下解剖部位：脾蒂、胃、横结肠、肝门、小网膜囊、肾血管以上的腹膜后间隙以及小肠系膜。   （来源：文档片段[相似度: 0.672]："经过次最佳肿瘤细胞减灭术的残留病灶(直径大于 $2\mathrm{cm}$ ),主要是位于上腹部不能切除的病灶。这些部位包括脾蒂、胃、横结肠、肝门、小网膜囊、肾血管以上的腹膜后间隙以及小肠系膜。"） | A | A | A |
| Chunk size=256, Overlap=100 Using SentenceSplitter | 根据Heintz等人的报道，大约50%的肿瘤细胞减灭术为次最佳减灭术。这些手术失败的主要原因是什么？请列出导致手术无法达到最佳减灭效果的、位于上腹部的具体解剖部位  失败主要原因：根据文档内容，手术失败的主要原因是位于上腹部的病灶无法完全切除，这些病灶通常体积较大、粘连严重或位置深在，导致残余肿瘤直径大于2cm。具体来说，上腹部是卵巢癌转移的常见区域，病灶难以切除是由于解剖复杂性、手术技术限制或肿瘤生物学特性（如广泛种植）。  - 位于上腹部的具体解剖部位：文档明确指出，次最佳减灭术后残留病灶主要位于上腹部，具体解剖部位包括：   - 脾蒂   - 胃   - 横结肠   - 肝门   - 小网膜囊   - 肾血管以上的腹膜后间隙   - 小肠系膜   这些部位在手术中常因涉及重要血管和器官（如肝、脾、胃），难以彻底切除肿瘤。   （依据文档：[相似度: 0.582] "经过次最佳肿瘤细胞减灭术的残留病灶(直径大于 $2\mathrm{cm}$ ),主要是位于上腹部不能切除的病灶。这些部位包括脾蒂、胃、横结肠、肝门、小网膜囊、肾血管以上的腹膜后间隙以及小肠系膜。"） | A | A | A |
| **Question 182: 在处理盆腔内广泛种植、粘连严重的晚期卵巢癌时，为何推荐采用腹膜后间隙进行操作（腹膜外操作）？请结合手术技术关键点，阐述其核心优势。** | | | | |
| Chunk size=512, Overlap=0 Using TokenTextSplitter | 在处理盆腔内广泛种植、粘连严重的晚期卵巢癌时，为何推荐采用腹膜后间隙进行操作（腹膜外操作）？请结合手术技术关键点，阐述其核心优势。  推荐原因：文档推荐采用腹膜后间隙操作（腹膜外操作）是因为卵巢癌的浸润能力相对较差，很少穿透腹膜而侵袭腹膜后肌肉、血管和神经。这允许在腹膜外安全地分离和切除盆腔肿块，避免损伤重要结构，同时便于处理粘连严重的区域（如子宫直肠窝）。  - 核心优势：核心优势是提高手术安全性、减少并发症，并实现更彻底的肿瘤切除。具体包括：   - 避免直接损伤腹膜后血管、神经和肌肉。   - 便于逆行性子宫切除，使子宫直肠窝肿块与直肠分离，从而切除困难粘连的肿瘤。  - 手术技术关键点：   1. 分离盆腔腹膜后间隙：从骨盆入口处、漏斗韧带外侧切开后腹膜，识别髂血管及输尿管。   2. 断扎圆韧带和卵巢血管：沿卵巢血管外侧延长腹膜切口，高位断扎卵巢血管。   3. 剥离盆腔侧腹膜：从盆腔后腹膜切缘由外往内向盆底深处剥离，达肿瘤最低点，沿乙状结肠及直肠旁剪开盆侧壁内侧腹膜。   4. 展开膀胱侧窝及直肠侧窝：分离输尿管至子宫动脉水平，便于暴露和切除肿瘤。   （来源：文档片段[相似度: 0.630]："晚期卵巢癌可选择腹膜后间隙进行操作(称腹膜外操作)。当切除子宫直肠窝肿块有困难时,可采用逆行性子宫切除...盆腔手术的技术关键是盆腔腹膜外操作和逆行性子宫切除。具体操作要点如下: 1) 分离盆腔腹膜后间隙...识别输尿管后高位断扎卵巢血管...沿乙状结肠及直肠旁剪开盆侧壁内侧腹膜..."） | B | B | B |
| Chunk size=256, Overlap=100 Using SentenceSplitter | 在处理盆腔内广泛种植、粘连严重的晚期卵巢癌时，为何推荐采用腹膜后间隙进行操作（腹膜外操作）？请结合手术技术关键点，阐述其核心优势  推荐原因：文档推荐腹膜外操作（即经腹膜后间隙操作）的核心原因是卵巢癌的浸润能力相对较差，很少穿透腹膜侵袭腹膜后结构（如肌肉、血管和神经），这使得在腹膜后间隙操作能更安全地分离肿瘤，避免损伤关键器官（如输尿管、直肠和血管），同时提高肿瘤切除率。尤其在盆腔肿瘤粘连严重时，常规腹膜内操作难以切净肿瘤，而腹膜外操作提供更好的暴露和可控性。  - 核心优势：   - 减少损伤风险：避免误伤输尿管、直肠和盆腔血管，降低手术并发症。   - 提高切除率：允许更彻底地切除盆腔深部肿瘤（如子宫直肠窝肿块），通过逆行性操作使肿瘤与周围组织分离。  - 手术技术关键点：基于文档描述，操作包括以下步骤：   1. 分离盆腔腹膜后间隙：从骨盆入口处、漏斗韧带外侧切开后腹膜，识别髂血管和输尿管，高位断扎卵巢血管。   2. 切除卵巢原发肿瘤：在近宫旁处切断卵巢固有韧带和输卵管，取下肿瘤以改善暴露。   3. 分离膀胱浆膜和推下膀胱：将腹膜切口移至膀胱上方无癌区，沿膀胱肌层与浆膜层间隙分离至子宫峡部，暴露宫颈筋膜。   4. 逆行性子宫切除：当子宫直肠窝肿块粘连严重时，采用此方法使肿块与直肠分离。   （依据文档：[相似度: 0.638] "晚期卵巢癌可选择腹膜后间隙进行操作(称腹膜外操作)...盆腔手术的技术关键是盆腔腹膜外操作和逆行性子宫切除。" 和 [相似度: 0.561] "具体操作要点如下: 1) 分离盆腔腹膜后间隙...识别输尿管后高位断扎卵巢血管。3) 分离膀胱浆膜,推下膀胱..."） | A | A | A |
| **Question 183: 切除腹主动脉旁淋巴结的两个手术途径分别如何操作？** | | | | |
| Chunk size=512, Overlap=0 Using TokenTextSplitter | 切除腹主动脉旁淋巴结的两个手术途径分别如何操作？  文档描述了切除腹主动脉旁淋巴结的两个主要手术途径：从头侧开始和从尾侧开始。操作步骤如下：   1. 从头侧开始（从肾蒂开始）：   - 先解剖肾蒂区域。   - 依次切除腔静脉旁、腔静脉-腹主动脉间、腹主动脉前、腹主动脉旁淋巴结。   - 适用于需要更彻底切除时，可能涉及分离血管（如用橡皮片提吊血管以切除后方淋巴结）。   2. 从尾侧开始（从腹主动脉分支开始）：   - 先清除右腹主动脉旁区的淋巴组织（包括腹主动脉前、腹主动脉与下腔静脉间、下腔静脉前及腰大肌旁的淋巴脂肪组织），在尾侧（腹主动脉分支处）切断结扎。   - 将组织向头侧反转游离，达十二指肠第三段水平后切断结扎。   - 然后处理左腹主动脉旁区：将乙状结肠系膜向左侧反转，暴露左区；在腹主动脉分支以上约4 cm处（肠系膜下动脉起始处）分离淋巴组织，向头侧分离至十二指肠第三段水平；注意避免损伤肠系膜下动脉。   （来源：文档片段[相似度: 0.508]："腹主动脉旁淋巴结切除也可从头侧开始, 先解剖肾蒂, 再依次切除腔静脉旁、腔静脉-腹主动脉间、腹主动脉前、腹主动脉旁淋巴结...根治性切除须切除腔静脉和腹主动脉后方的淋巴结...腹主动脉旁淋巴结切除也可从头侧开始...或从尾侧开始..."） | B | B | B |
| Chunk size=256, Overlap=100 Using SentenceSplitter | 切除腹主动脉旁淋巴结的两个手术途径分别如何操作？  文档描述了腹主动脉旁淋巴结切除的两种手术途径，基于选择性切除和根治性切除的分类：   1. 选择性切除：   - 操作方式：切除范围限于腔静脉旁、腔静脉-腹主动脉间及腹主动脉旁淋巴结。   - 适用情况：常用于诊断或分期，避免过度创伤，适合早期癌或残余瘤较小的病例。   2. 根治性切除：   - 操作方式：在选择性切除的基础上，额外切除腔静脉及腹主动脉后方的淋巴结。   - 适用情况：用于提供更精确的预后评估，特别适合晚期癌无残余肿瘤或残余瘤直径小于0.5cm的病例，以彻底清除潜在转移。   - 总体说明：文档未提供详细手术步骤（如切口或器械使用），但强调切除范围取决于病情。根治性切除更全面，但风险较高，需由训练有素的妇科肿瘤医师执行。   （依据文档：[相似度: 0.516] "腹主动脉旁淋巴结切除分选择性和根治性切除,前者指切除腔静脉旁、腔静脉- 腹主动脉间及腹主动脉旁淋巴结,后者还包括腔静脉及腹主动脉后方的淋巴结。" 和 [相似度: 0.515] "根治性淋巴结切除对估计淋巴结的情况和提供更精确的预后和治疗依据,比选择性切除更合适..."） | D | D | D |
| **Question 184: 恶性腹水处理中穿刺术的推荐穿刺点位置是什么？** | | | | |
| Chunk size=512, Overlap=0 Using TokenTextSplitter | 恶性腹水处理中穿刺术的推荐穿刺点位置是什么？  知识库中未找到答案。文档中提到了在手术前抽尽腹水以减轻症状和利于手术（例如在[相似度: 0.561]片段："手术前应尽量抽尽胸水和腹水,可以减轻症状,有利于麻醉和手术的进行"），但没有指定穿刺术的推荐穿刺点位置（如具体解剖位置或技术细节）。因此，基于提供的上下文，无法找到相关信息。 | D | D | D |
| Chunk size=256, Overlap=100 Using SentenceSplitter | 恶性腹水处理中穿刺术的推荐穿刺点位置是什么？  推荐穿刺点位置：文档明确指出，穿刺术的推荐穿刺点通常在"脐水平的腹直肌侧缘"。这个位置选择是为了减少并发症风险（如避免损伤腹腔内脏器），同时便于操作和引流。  - 附加说明：穿刺术主要用于缓解症状（如呼吸困难或疼痛），但文档强调它不作为诊断手段，因为可能引起播种、出血或感染等并发症。仅在腹水无法用化疗控制时，作为姑息治疗。   （依据文档：[相似度: 0.527] "穿刺点通常在脐水平的腹直肌侧缘。"） | A | A | A |
| **Question 185: 腹膜交界性浆液性肿瘤开腹手术的典型病理发现是什么？** | | | | |
| Chunk size=512, Overlap=0 Using TokenTextSplitter | 腹膜交界性浆液性肿瘤开腹手术的典型病理发现是什么？  知识库中未找到答案。文档中讨论了交界性肿瘤（如[相似度: 0.585]片段提到I期交界性肿瘤的淋巴结受累率和复发治疗），但没有描述开腹手术时的典型病理发现（如肿瘤的宏观外观、组织学特征或常见分布）。文档焦点在于手术方法和预后，而非具体病理发现。因此，基于提供的上下文，无法找到相关信息。 | D | D | D |
| Chunk size=256, Overlap=100 Using SentenceSplitter | 腹膜交界性浆液性肿瘤开腹手术的典型病理发现是什么？  知识库中未找到答案：文档提供了关于卵巢交界性肿瘤的信息（如淋巴结内可能存在病灶或子宫内膜异位灶），但未具体提及"腹膜交界性浆液性肿瘤"的典型病理发现。文档主要讨论卵巢癌、输卵管癌和子宫内膜癌的肿瘤细胞减灭术，未描述该特定肿瘤的开腹手术病理特征。因此，基于提供的上下文，无法回答此问题。 | D | D | D |
| **Question 186: 腹膜黏液性肿瘤的常见发生部位和组织学特征是什么？** | | | | |
| Chunk size=512, Overlap=0 Using TokenTextSplitter | 腹膜黏液性肿瘤的常见发生部位和组织学特征是什么？  常见发生部位：根据文档内容，腹膜黏液性肿瘤（如腹膜假黏液瘤）常见于阑尾和卵巢。文档指出：“当卵巢和阑尾皆有病变时,卵巢病变多为阑尾病变的转移”，并强调“对腹膜假黏液瘤病人手术时应同时切除阑尾,不管其肉眼观是否有病变”。这表明阑尾是原发或转移的常见部位，卵巢也可能受累。 - 组织学特征：文档描述为“两者常有不典型和复层的上皮细胞,因而被划分为交界性肿瘤”。这表示肿瘤细胞具有不典型性（细胞形态异常）和复层结构（多层细胞排列），病理上常被归类为交界性肿瘤（介于良性和恶性之间）。 - 总结：基于文档，腹膜黏液性肿瘤的常见发生部位是阑尾和卵巢，组织学特征包括不典型和复层的上皮细胞，常被划分为交界性肿瘤。 | A | A | A |
| Chunk size=256, Overlap=100 Using SentenceSplitter | 腹膜黏液性肿瘤的常见发生部位和组织学特征是什么？  在知识库中找到相关信息。  - 常见发生部位：文档指出，腹膜黏液性肿瘤（如腹膜假黏液瘤）常见于腹腔内，特别是来源于卵巢和阑尾。例如："需要强调的是腹膜假黏液瘤,这是一类腹腔内存在黏液、并引起腹膜种植反应、来源于卵巢和阑尾的黏液性肿瘤。"（相似度: 0.548）。此外，文档提到："伴腹腔广泛播散的黏液瘤可以发生于阑尾,或者在阑尾与一侧或两侧卵巢同时发生。"（相似度: 0.586），表明阑尾和卵巢是主要来源部位。  - 组织学特征：文档描述这类肿瘤具有不典型和复层的上皮细胞，常被划分为交界性肿瘤。例如："两者常有不典型和复层的上皮细胞,因而被划分为交界性肿瘤。"（相似度: 0.548）。组织学上，它们表现为黏液性肿瘤，可引起腹膜种植反应，病理形态虽属良性或交界性，但极易复发。   综上，腹膜黏液性肿瘤的常见发生部位是腹腔内（尤其卵巢和阑尾），组织学特征包括不典型和复层的上皮细胞，常被分类为交界性肿瘤。 | A | A | A |
| **Question 187: 卵巢黏液性交界性肿瘤患者是否需常规行阑尾切除术？如果是，为什么要进行常规行阑尾切除术？** | | | | |
| Chunk size=512, Overlap=0 Using TokenTextSplitter | 卵巢黏液性交界性肿瘤患者是否需常规行阑尾切除术？如果是，为什么要进行常规行阑尾切除术？  是否需要常规行阑尾切除术：是的，文档明确支持常规行阑尾切除术。例如：“阑尾切除术已成为卵巢肿瘤细胞减灭术的组成部分之一”和“卵巢交界性黏液瘤须同时切除阑尾”。 - 原因：文档解释，这是因为阑尾可能隐藏原发或转移性病灶，即使肉眼观正常，病理检查也可能发现黏液性肿瘤。具体来说：“当卵巢和阑尾皆有病变时,卵巢病变多为阑尾病变的转移,尽管有些病例术时阑尾看上去正常,但在病理检查时却存在黏液性肿瘤”。因此，切除阑尾有助于减少术后残留病灶、发现亚临床转移，并改善预后。 - 总结：是的，需要常规行阑尾切除术，原因是为了排除阑尾作为原发灶或转移灶的可能性，降低复发风险。 | A | A | A |
| Chunk size=256, Overlap=100 Using SentenceSplitter | 卵巢黏液性交界性肿瘤患者是否需常规行阑尾切除术？如果是，为什么要进行常规行阑尾切除术？  在知识库中找到相关信息。  - 是否需常规行阑尾切除术：是的，文档明确表示卵巢黏液性交界性肿瘤患者需要常规行阑尾切除术。例如："黏液性交界性肿瘤的病人还包括阑尾切除"（相似度: 0.599），以及"卵巢交界性黏液瘤须同时切除阑尾"（相似度: 0.452）。  - 原因：文档解释，阑尾切除是必要的，因为阑尾可能是原发灶或转移灶的来源，即使肉眼观察正常，病理检查也可能发现病变。例如："当卵巢和阑尾皆有病变时,卵巢病变多为阑尾病变的转移,尽管有些病例术时阑尾看上去正常,但在病理检查时却存在黏液性肿瘤。因此,从临床实践的观点来说,对腹膜假黏液瘤病人手术时应同时切除阑尾,不管其肉眼观是否有病变"（相似度: 0.548）。这有助于减少术后残留病灶、发现亚临床转移，并准确评估分期和预后。   综上，卵巢黏液性交界性肿瘤患者需常规行阑尾切除术，主要目的是识别和处理潜在的阑尾原发或转移性病变，以改善手术效果和预后。 | A | A | A |
| **Question 188: I期或II期输卵管癌的标准手术方法是什么？** | | | | |
| Chunk size=512, Overlap=0 Using TokenTextSplitter | I期或II期输卵管癌的标准手术方法是什么？  标准手术方法：文档指出，对于I期或II期输卵管癌，基本术式是“全子宫及双附件切除术”。具体包括：  - 切除全子宫和双侧附件（输卵管和卵巢）。  - 大网膜切除（横结肠以下部分）。  - 腹膜后淋巴结选择性切除。  - 对于II期病人，如伴有盆腔转移，需“同时切除受累的盆腔腹膜及转移病灶”。 - 依据：文档在“原发性输卵管癌”部分描述：“全子宫及双附件切除术是早期 (I、II期) 输卵管癌最基本术式。除行全子宫、双附件切除外,还包括大网膜切除,腹膜后淋巴结选择性切除, II期病人伴有盆腔转移者需同时切除受累的盆腔腹膜及转移病灶。” - 总结：标准手术方法是全子宫及双附件切除术，辅以大网膜切除和腹膜后淋巴结选择性切除；II期病人还需切除受累的盆腔腹膜及转移病灶。 | A | A | A |
| Chunk size=256, Overlap=100 Using SentenceSplitter | I期或II期输卵管癌的标准手术方法是什么？  在知识库中找到相关信息。  - 标准手术方法：文档指出，对于I期或II期输卵管癌，最基本的手术是全子宫及双附件切除术。具体包括：   - 全子宫和双侧附件（输卵管和卵巢）切除。   - 大网膜切除。   - 腹膜后淋巴结选择性切除。   - 对于II期患者，还需切除受累的盆腔腹膜及转移病灶。   例如："全子宫及双附件切除术 是早期 (I、II期) 输卵管癌最基本术式。除行全子宫、双附件切除外, 还包括大网膜切除, 腹膜后淋巴结选择性切除, II期病人伴有盆腔转移者需同时切除受累的盆腔腹膜及转移病灶。"（相似度: 0.531）。此外，文档强调手术需全面探查和分期："开腹经病理切片证实为输卵管癌后, 首先要进行全面的手术探查, 确定手术分期。"（相似度: 0.456）。   综上，I期或II期输卵管癌的标准手术方法是全子宫及双附件切除术，辅以大网膜切除和淋巴结选择性切除；II期患者还需额外切除受累的盆腔组织。 | A | A | A |
| **Question 189: 子宫病灶刻出术的手术操作步骤是什么？** | | | | |
| Chunk size=512, Overlap=0 Using TokenTextSplitter | 子宫病灶刻出术的手术操作步骤是什么？  手术操作步骤：文档描述了子宫病灶刻出术（可能指剜出术）的步骤，主要针对恶性滋养细胞肿瘤的子宫病灶。关键步骤如下：  1. 切口与探查：经下腹正中切口进入腹腔，仔细探查腹盆腔器官，特别是内生殖器官及邻近组织。  2. 病灶定位与切口：在病灶部位做纺锤形切口（如已破溃，在破溃处两侧作切口）。  3. 钝性剥离：用血管钳沿瘤体两侧行钝性剥离，注意瘤体处有一层包膜（静脉壁），避免弄破以减少出血。  4. 钳夹与切除：剥离至肿瘤上下端与静脉连接处时，先行钳夹，然后切除瘤体，防止大出血。  5. 缝合与处理：完整剜出病灶后，缝合创面；如遇出血，可配合局部注射5-FU或压迫止血。 - 依据：文档在“子宫病灶刻出术”部分提到：“在黏膜上做一与阴道轴平行的纺锤形切口...然后用血管钳沿瘤体两侧行钝性剥离...剥离至肿瘤上下两端与静脉连接处,则必须先行钳夹,然后再切除瘤体...个别结节已破溃出血者...可将破溃结节之血块及组织尽可能剔除,用羊肠线缝合”。 - 总结：步骤包括腹腔探查、病灶定位、纺锤形切口、钝性剥离、钳夹切除瘤体，最后缝合创面。 | C | C | C |
| Chunk size=256, Overlap=100 Using SentenceSplitter | 子宫病灶刻出术的手术操作步骤是什么？  在知识库中未找到答案。  - 文档中多次提及各种妇科肿瘤手术（如肿瘤细胞减灭术、全子宫切除术、保守性手术等），但未出现“子宫病灶刻出术”这一术语或类似描述（如“病灶切除”或“刻出术”）。提供的上下文主要聚焦于卵巢癌、输卵管癌和腹膜肿瘤的手术，未涉及子宫病灶的特定切除步骤。因此，基于文档，无法提供相关信息。 | D | D | D |
| **Question 190: 低危恶性滋养细胞肿瘤病人首选的化疗方案是什么** | | | | |
| Chunk size=512, Overlap=0 Using TokenTextSplitter | 低危恶性滋养细胞肿瘤病人首选的化疗方案是什么?  回答：在知识库中未找到答案。 - 理由：文档讨论了恶性滋养细胞肿瘤的化疗，但未明确指定低危病人的首选方案。文档提到化疗药物如5-FU、更生霉素、甲氨蝶呤等（例如：“所用药物包括5-FU、更生霉素、甲氨蝶呤等”），并提到高危病人需综合治疗（化疗加手术）。然而，文档没有区分低危和高危的具体化疗方案，也没有提供低危病人的首选方案（如单药或联合方案）。因此，基于提供的上下文，无法提取相关信息。  # | D | D | D |
| Chunk size=256, Overlap=100 Using SentenceSplitter | 低危恶性滋养细胞肿瘤病人首选的化疗方案是什么？  在知识库中未找到答案。  - 文档中提到了“恶性滋养细胞肿瘤”的章节（如“第十一章 恶性滋养细胞肿瘤的手术及其他治疗”），但提供的片段未详细描述化疗方案。例如，文档列出“第五节 化学治疗 (471)”，但具体内容未在上下文中出现，也未提及“低危”分类或首选方案。因此，基于文档，无法确定低危恶性滋养细胞肿瘤的首选化疗方案。 | D | D | D |
| **Question 191: 髂内动脉结扎在控制盆腔大出血中的适应证和操作要点是什么？** | | | | |
| Chunk size=512, Overlap=0 Using TokenTextSplitter | 髂内动脉结扎在控制盆腔大出血中的适应证和操作要点是什么？  在文档中，髂内动脉结扎被描述为控制盆腔大出血的重要方法。相关信息总结如下： - 适应证：  - 预测某些手术可能出现难以控制的大出血时，可预防性结扎髂内动脉。具体适用于：  - 广泛性宫旁组织切除、宫颈肌瘤切除、阴道上段广泛切除术等手术。  - 手术区域周围存在广泛粘连或浸润（如由子宫内膜异位症、炎症或肌瘤引起）。  - 已有出血倾向的病人。  - 在宫旁、骶前或阴道广泛性出血时，如果经纱布垫压迫或缝扎止血无效，可结扎双侧髂内动脉（作为治疗性措施）。  - 文档来源：[相似度: 0.535] 和 [相似度: 0.422] 片段。  - 操作要点：  - 暴露位置：于骨盆入口处，在卵巢血管内侧，暴露输尿管与髂总动脉交叉处。需仔细游离周围组织，避免损伤输尿管。  - 结扎方法：用7号丝线双重结扎髂内动脉（文档中示例图7-29～图7-31显示分离和结扎过程）。操作时需确保血管完全游离，结扎牢固。  - 注意事项：在结扎前，应评估出血风险；结扎后需观察止血效果，必要时结合其他止血措施（如纱布压迫或填塞）。  - 文档来源：[相似度: 0.535] 和 [相似度: 0.422] 片段。  # | B | B | B |
| Chunk size=256, Overlap=100 Using SentenceSplitter | 髂内动脉结扎在控制盆腔大出血中的适应证和操作要点是什么？  根据文档内容，髂内动脉结扎是控制盆腔大出血的重要技术，其适应证和操作要点如下：  - 适应证：   - 预测某些手术可能出现难以控制的大出血时，可预防性结扎（如广泛性宫旁组织切除、宫颈肌瘤切除、阴道上段广泛切除术）。   - 特别适用于手术区域存在广泛粘连、浸润或已有出血倾向的情况（例如，癌瘤侵犯导致血管脆弱）。   - 当其他止血方法（如纱布压迫或缝扎）无效时，用于处理宫旁、骶前或阴道广泛性出血。   （来源：[相似度: 0.485] 和 [相似度: 0.403]）   - 操作要点：   - 暴露血管：在骨盆入口处，卵巢血管内侧，暴露输尿管与髂总动脉交叉处。游离周围组织，清晰识别髂内、外动脉分叉。   - 游离动脉：沿髂内动脉向下游离约1cm，用长弯血管钳或直角钳平行分离两侧结缔组织，贴动脉壁下方小心分离，避免损伤壁薄的髂内静脉（因其易导致大出血）。   - 结扎位置：结扎线应放置在后分支的远侧；若结扎高于此水平，可能引起臀部和坐骨神经的局部缺血症状。   - 注意事项：操作中需确保血管与周围组织（如输尿管和静脉）完全分离，防止误伤。双侧结扎可显著减少血流，但需评估缺血风险。   （来源：[相似度: 0.403] 和 [相似度: 0.405]）   文档中未提及具体结扎材料（如丝线规格），但强调了技术细节以避免并发症。 | B | B | B |
| **Question 192: 盆腔根治中如何处理与癌瘤粘连的髂血管以避免损伤？** | | | | |
| Chunk size=512, Overlap=0 Using TokenTextSplitter | 盆腔根治中如何处理与癌瘤粘连的髂血管以避免损伤？  文档中详细描述了处理与癌瘤粘连的髂血管的方法，以避免损伤。关键点包括： - 处理原则：  - 优先从外侧解剖：避免从内侧强力剔出粘连的淋巴结或肿块，以减少血管损伤风险。应先解剖腰大肌与髂总（外）动、静脉，游离髂外动、静脉，暴露骨盆侧壁的血管神经位置，确保视野清晰。  - 针对粘连紧密的情况：如果淋巴结与髂内动脉紧密粘连，可在肿块上、下方分离相连的部分血管，切断并结扎，连同肿块切除一段血管（避免强行剥离导致大出血）。  - 仔细分离技术：在切除髂总动脉区或腹主动脉旁淋巴结时，需在其表面分离上方及侧方脂肪组织，并结扎伴随静脉（如腔静脉“伴随”静脉），以防止误伤髂总静脉或下腔静脉。 - 具体步骤：  - 使用钝性和锐性分离结合，避免过度牵拉。  - 如遇闭孔区粘连，先使转移淋巴结与髂外静脉内侧壁分开，解剖腰大肌内侧面，暴露闭孔神经，将其与淋巴结分离（可用食指协助挽出淋巴结）。  - 如果转移淋巴结融合固定且难以安全切除，应放弃手术并用银夹标记，改为术后放疗。 - 文档来源：[相似度: 0.446] 和 [相似度: 0.443] 片段。  # | C | C | C |
| Chunk size=256, Overlap=100 Using SentenceSplitter | 盆腔根治中如何处理与癌瘤粘连的髂血管以避免损伤？  在盆腔根治术中，癌瘤与髂血管（尤其是静脉）粘连时，需谨慎处理以避免损伤。文档中描述了以下方法：  - 暂时性大血管阻断：   - 当癌瘤或转移淋巴结与髂血管壁（特别是静脉壁）紧密粘连或疑似局部浸润时，先在受累血管的上、下方游离，用无损伤血管钳暂时钳夹阻断血流。然后剥离肿块，这能提高安全性并减少出血风险。   （来源：[相似度: 0.485]）  - 精细剥离技术：   - 对于粘连的淋巴结（如闭孔区转移淋巴结），应先使淋巴结与髂外静脉内侧壁分离，解剖腰大肌内侧面，暴露闭孔神经。   - 采用“从包膜内剥离”的方法：小心解剖淋巴结包膜，避免强行剥离；如淋巴结融合固定，应放弃切除并用银夹标记，以防血管撕裂。   - 在切除髂总动脉区或腹主动脉旁淋巴结时，仔细分离表面上方及侧方脂肪组织，并结扎伴随静脉（如腔静脉“伴随”静脉），以减少出血。   （来源：[相似度: 0.462] 和 [相似度: 0.446]）  - 关键原则：操作需在直视下进行，按解剖层次分离（如识别髂血管与输尿管关系），避免过度牵拉或锐性操作。如粘连严重，优先保护血管完整性，必要时终止剥离。  文档中未提及其他辅助技术（如术中影像引导），但强调了解剖知识和谨慎操作的重要性。 | B | B | B |
| **Question 193: 为什么广泛性子宫切除术后容易出现膀胱功能障碍（如尿潴留）？从神经解剖学的角度解释其根本原因。** | | | | |
| Chunk size=512, Overlap=0 Using TokenTextSplitter | 为什么广泛性子宫切除术后容易出现膀胱功能障碍（如尿潴留）？从神经解剖学的角度解释其根本原因  文档从神经解剖学角度解释了广泛性子宫切除术后膀胱功能障碍（如尿潴留）的根本原因： - 根本原因：  - 手术切断了支配膀胱的神经纤维，导致神经性膀胱麻痹。具体神经损伤包括：  - 骶髓排尿反射中断：支配膀胱的副交感神经纤维（来自第Ⅱ、Ⅲ、Ⅳ骶神经）和交感神经纤维（位于盆腔神经丛）在广泛切除宫旁组织和阴道旁组织时被损伤。这中断了骶髓的排尿反射弧，丧失尿意，并导致逼尿肌（膀胱壁肌肉）收缩不全。  - 尿道括约肌调节中断：尿道内外括约肌的意识调节被中断，病人无法自然排尿。  - 膀胱壁神经节受损：手术时广泛剥离膀胱，破坏了膀胱壁的神经节和血液供应，加重了肌无力和膀胱过度充盈。  - 这些神经损伤与手术范围相关：切除的主韧带、骶韧带及阴道组织越多，神经损伤程度越重，膀胱功能障碍风险越高。 - 病理生理链条：神经损伤 → 骶髓反射中断 → 逼尿肌功能丧失 → 膀胱过度充盈 → 尿潴留 → 易继发感染。 - 文档来源：[相似度: 0.487] 和 [相似度: 0.438] 片段。  # | B | A | A |
| Chunk size=256, Overlap=100 Using SentenceSplitter | 为什么广泛性子宫切除术后容易出现膀胱功能障碍（如尿潴留）？从神经解剖学的角度解释其根本原因。  广泛性子宫切除术后膀胱功能障碍（如尿潴留）的根本原因与神经损伤相关，文档从神经解剖学角度提供了明确解释：  - 神经解剖学基础：   - 支配膀胱的副交感神经源自第2、3、4骶神经的骨盆神经，这些神经纤维从骨盆底向前上方汇集于主韧带及子宫骶骨韧带内。   - 在直肠外侧上部，骨盆神经与交感神经（腹下神经）汇合形成骨盆神经丛，该神经丛向膀胱、子宫、阴道和直肠发出分支。膀胱神经丛具体位于输尿管外侧，经阴道旁组织进入膀胱，负责调控膀胱收缩和排尿反射。   （来源：[相似度: 0.510] 和 [相似度: 0.485]）   - 术后功能障碍机制：   - 手术中广泛切除主韧带、子宫骶骨韧带及周围组织时，不可避免地切断了这些神经纤维，导致神经性膀胱麻痹。   - 具体影响包括：   - 骶髓排尿反射中断：丧失尿意和自主排尿能力，膀胱过度充盈后逼尿肌伸长无力，收缩功能不全。   - 尿道括约肌调节障碍：内外括约肌的意识控制中断，无法自然排尿。   - 辅助因素：手术中广泛剥离膀胱，损伤膀胱壁神经节和血液供应，膀胱位置改变进一步加重功能障碍。   （来源：[相似度: 0.510]）   文档指出，术后尿潴留发生率为2.6%~44.91%，证实神经损伤是核心原因。未提及血管或缺血因素作为主要机制。 | A | A | A |
| **Question 194: 一名患者在接受盆腔淋巴切除术后，形成了较大的盆腔淋巴囊肿。请根据文本内容，推断这个淋巴囊肿引发急性肾盂肾炎的病理生理链条。** | | | | |
| Chunk size=512, Overlap=0 Using TokenTextSplitter | 一名患者在接受盆腔淋巴切除术后，形成了较大的盆腔淋巴囊肿。请根据文本内容，推断这个淋巴囊肿引发急性肾盂肾炎的病理生理链条  基于文档内容，盆腔淋巴囊肿可引发急性肾盂肾炎的病理生理链条如下（推断链条基于淋巴囊肿的并发症机制）： - 病理生理链条：  1. 淋巴囊肿形成：术后淋巴管残端未妥善结扎（如腹股沟淋巴管或闭孔淋巴管），导致淋巴液积聚形成囊肿。  2. 输尿管梗阻：淋巴囊肿体积增大后，可压迫盆腔输尿管（文档明确指出淋巴囊肿可引起“输尿管梗阻”）。  3. 尿液滞留：输尿管梗阻导致尿液排出受阻，膀胱或肾盂内尿液滞留。  4. 细菌滋生和上行感染：尿液滞留为细菌（如大肠杆菌）提供了滋生环境，易引发泌尿道感染。文档提到尿潴留可导致“继发性泌尿道感染，有慢性感染者可急性发作”。  5. 急性肾盂肾炎：细菌从膀胱经输尿管上行至肾盂，引起肾实质和肾盂的急性感染，表现为发热、腰痛等症状。 - 文档依据：  - 淋巴囊肿并发症：直接提到“可引起输尿管梗阻”（[相似度: 0.487] 片段）。  - 感染机制：尿潴留或梗阻易致泌尿道感染，可急性发作（[相似度: 0.438] 片段）。 - 因此，链条为：淋巴囊肿 → 压迫输尿管 → 输尿管梗阻 → 尿液滞留 → 细菌上行感染 → 急性肾盂肾炎。  # | A | A | A |
| Chunk size=256, Overlap=100 Using SentenceSplitter | 一名患者在接受盆腔淋巴切除术后，形成了较大的盆腔淋巴囊肿。请根据文本内容，推断这个淋巴囊肿引发急性肾盂肾炎的病理生理链条。  基于文档内容，盆腔淋巴囊肿可能通过以下病理生理链条引发急性肾盂肾炎：  1. 淋巴囊肿压迫输尿管：   - 淋巴囊肿形成后（发生率5%~30%），体积增大可压迫盆腔输尿管，导致输尿管梗阻。双侧淋巴囊肿更易引起梗阻性肾衰竭。   （来源：[相似度: 0.526]）   2. 输尿管梗阻与肾盂积水：   - 梗阻阻碍尿液引流，引起肾盂积水。文档指出，输尿管梗阻的程度是泌尿系急症处理的指标，肾盂积水表示病变进展，可能伴随感染。   （来源：[相似度: 0.530] 和 [相似度: 0.526]）   3. 细菌滋生与上行感染：   - 梗阻和积水为细菌（如肠道菌群）提供了滋生环境。淋巴囊肿本身可能因术中污染或术后引流不畅而感染，形成盆腔脓肿。   - 感染可经输尿管上行至肾脏，引发急性肾盂肾炎。文档提到，淋巴囊肿并发症包括“感染和疼痛”，且术前准备不佳易导致盆腔感染。   （来源：[相似度: 0.526] 和 [相似度: 0.457]）   4. 急性肾盂肾炎发作：   - 肾盂积水合并细菌感染后，表现为发热、腰痛及脓尿，符合急性肾盂肾炎特征。文档指出，尿路感染（如继发于尿潴留）可急性发作，加重肾脏损害。   （来源：[相似度: 0.455]）   病理生理链条总结：淋巴囊肿 → 输尿管梗阻 → 肾盂积水 → 细菌滋生/上行感染 → 急性肾盂肾炎。文档未直接提及“肾盂肾炎”一词，但基于并发症逻辑推断此链条合理。 | A | A | A |
| **Question 195: 腹腔镜手术过程中，有哪些不同性质的因素或事件可能导致术中需要“中转开腹”？请列举至少三种不同类型的具体原因。** | | | | |
| Chunk size=512, Overlap=0 Using TokenTextSplitter | 腹腔镜手术过程中，有哪些不同性质的因素或事件可能导致术中需要“中转开腹”？请列举至少三种不同类型的具体原因  在文档中，仅提到两种导致腹腔镜手术中转开腹的具体原因，未提供第三种或更多类型的原因。基于上下文： - 列举原因：  1. 肥胖：文档明确说明肥胖是中转开腹的主要原因之一，占中转手术的30%。肥胖导致术野暴露困难、操作空间受限。  2. 既往的手术粘连：文档指出既往手术粘连占中转手术的17%。粘连使解剖结构不清，增加器官（如肠管或血管）损伤风险。 - 未找到更多原因：文档中仅提到这两种原因（[相似度: 0.433] 片段）。尽管其他部分描述了腹腔镜并发症（如血管损伤或感染），但这些未直接与“中转开腹”关联。因此，无法列举第三种原因。 - 回答：在知识库中未找到第三种或更多类型的具体原因；文档中仅提供肥胖和既往手术粘连两种。 | B | B | B |
| Chunk size=256, Overlap=100 Using SentenceSplitter | 腹腔镜手术过程中，有哪些不同性质的因素或事件可能导致术中需要“中转开腹”？请列举至少三种不同类型的具体原因。  文档中提到了腹腔镜手术中转开腹的具体原因，主要涉及技术限制、解剖异常和并发症。以下是三种不同类型的原因，各基于不同性质：  1. 患者因素（解剖异常或体质相关）：   - 肥胖：占中转手术的30%。肥胖导致手术视野暴露困难、操作空间受限，增加误伤风险。   （来源：[相似度: 0.423]）   2. 既往病史因素（粘连或疾病相关）：   - 既往手术粘连：占中转手术的17%。腹腔内粘连（如剖宫产史或子宫内膜异位症）使解剖结构不清，分离困难，易损伤器官。   - 腹腔内疾病：如意外发现肿瘤扩散、严重炎症或纤维化，使腹腔镜操作不可行。   （来源：[相似度: 0.423] 和 [相似度: 0.405]）   3. 术中并发症因素（紧急事件相关）：   - 血管损伤：如误伤髂血管、腹主动脉或腔静脉，导致大出血和休克，需立即开腹止血。   - 器官损伤：如输尿管或肠管损伤，若腹腔镜下无法修复，必须中转开腹。   （来源：[相似度: 0.434] 和 [相似度: 0.405]）   文档还提到其他原因（如肿瘤过大或设备故障），但以上三种类型（患者体质、既往粘连、急性并发症）是最典型的。中转开腹决策基于安全考虑，以避免进一步损伤。 | A | A | A |
| **Question 196: 腹腔镜全子宫切除术中处理子宫血管的常用方法是什么？** | | | | |
| Chunk size=512, Overlap=0 Using TokenTextSplitter | 腹腔镜全子宫切除术中处理子宫血管的常用方法是什么？  基于文档内容，腹腔镜全子宫切除术（TLH）中处理子宫血管的常用方法包括结扎、电凝或使用钛夹/吻合器（如EndoGIA）。具体描述如下：  - 在[相似度: 0.462]片段中提到："如果手术者准备经腹腔镜结扎子宫血管,则阔韧带前后叶应进一步分离...使用尖嘴弯形分离器轻轻分离。如果用电切(ESU)则必须十分小心。"  - 在[相似度: 0.462]片段中还提到："用钛夹钳(EndoGIA)横夹结扎"骨盆漏斗韧带等结构，这表明在处理血管时可能采用类似器械。  - 在[相似度: 0.420]片段中提到："用血管闭合器、其他凝切器械或者内镜吻合器结扎"，但这是针对骶韧带，间接支持血管处理可使用凝切器械。  综上，常用方法是：结扎（如缝合或钛夹）、电凝（单极或双极电凝）或吻合器（如EndoGIA），具体选择取决于手术者习惯和病人情况。文档未指定唯一方法，但强调了止血可靠性和避免副损伤的原则。 | A | B | B |
| Chunk size=256, Overlap=100 Using SentenceSplitter | 腹腔镜全子宫切除术中处理子宫血管的常用方法是什么？  在文档中，腹腔镜全子宫切除术（TLH）中处理子宫血管的常用方法有明确描述。根据上下文： - 在[相似度: 0.548]片段中提到：“如果手术者准备经腹腔镜结扎子宫血管...用弯剪或剥离器钝性加锐性分离该处,子宫血管便会清楚地暴露出来。应在直视下用钛夹钳钉夹子宫血管并离断...这种先用钛钉结扎再行切断的方法,能比较准确地处理子宫切除术中最困难的步骤,较使用套圈和双极电凝更可靠。” - 该方法强调在腹腔镜下直接暴露子宫血管后，使用钛夹或钛钉进行结扎和离断，以提高准确性和可靠性，避免并发症如出血。  因此，基于文档，腹腔镜全子宫切除术中处理子宫血管的常用方法是：在直视下使用钛夹或钛钉进行结扎和离断，该方法优于套圈或双极电凝。 | A | A | A |
| **Question 197: 腹腔镜协助下经阴道切除子宫的适应证有哪些？** | | | | |
| Chunk size=512, Overlap=0 Using TokenTextSplitter | 腹腔镜协助下经阴道切除子宫的适应证有哪些？  基于文档内容，腹腔镜协助下经阴道切除子宫（LAVH）的适应证明确列出在[相似度: 0.465]片段中："第六节 腹腔镜协助下经阴道切除子宫"下的"一、适应证"。具体包括以下情况（无盆腔粘连者）：  - (1) 子宫脱垂；  - (2) 经保守治疗无效的功能失调性子宫出血；  - (3) 子宫良性肿瘤；  - (4) 子宫内膜增殖症。  文档强调这些适应证需在"无盆腔粘连"的前提下，并排除了禁忌证如盆腔严重粘连、阴道狭窄等。因此，适应证仅限于上述四种情况。 | A | B | A |
| Chunk size=256, Overlap=100 Using SentenceSplitter | 腹腔镜协助下经阴道切除子宫的适应证有哪些？  文档中详细列出了腹腔镜协助下经阴道切除子宫（LAVH）的适应证。根据上下文： - 在[相似度: 0.508]片段中明确指出：“腹腔镜协助下经阴道切除子宫 # 一、适应证 以下情况无盆腔粘连者: (1) 子宫脱垂; (2) 经保守治疗无效的功能失调性子宫出血; (3)子宫良性肿瘤; (4)子宫内膜增殖症。” - 此外，在[相似度: 0.696]片段中补充了LAVH的目的：“LAVH 术式是为了扩大经阴子宫切除的适应证, 使一些原本需要开腹手术的病人通过镜下处理使经阴手术变得容易”，但具体适应证以[相似度: 0.508]片段为准。  因此，基于文档，腹腔镜协助下经阴道切除子宫的适应证包括：无盆腔粘连的子宫脱垂、经保守治疗无效的功能失调性子宫出血、子宫良性肿瘤、子宫内膜增殖症。 | B | B | B |
| **Question 198: 在腹腔镜协助下经阴道切除子宫（LAVH）的手术中，当处理完圆韧带和骨盆漏斗韧带后，如何处理子宫血管？** | | | | |
| Chunk size=512, Overlap=0 Using TokenTextSplitter | 在腹腔镜协助下经阴道切除子宫（LAVH）的手术中，当处理完圆韧带和骨盆漏斗韧带后，如何处理子宫血管？  基于文档内容，在LAVH手术中，处理完圆韧带和骨盆漏斗韧带后，子宫血管的处理方法取决于盆底松弛程度和阴道暴露情况：  - 在[相似度: 0.462]片段中描述："切断处理子宫血管...根据子宫和阴道的松弛程度,手术者可继续应用腹腔镜...病人盆底比较松弛、子宫血管较易经阴道暴露者,则子宫血管没有必要由腹腔镜处理...但如果病人盆底不太松弛,阴道暴露受限,由腹腔镜处理子宫血管..."。  - 具体方法：   - 如果盆底松弛、阴道暴露良好：优先经阴道处理子宫血管（文档未详述阴道具体技术，但强调此方式更安全）。   - 如果盆底不松弛、阴道暴露受限：经腹腔镜处理，包括进一步分离阔韧带前后叶，然后使用结扎、电凝或吻合器（如EndoGIA）进行结扎或切断。  文档未提供更详细的步骤，但指出腹腔镜处理时需小心操作以避免并发症。 | A | A | A |
| Chunk size=256, Overlap=100 Using SentenceSplitter | 在腹腔镜协助下经阴道切除子宫（LAVH）的手术中，当处理完圆韧带和骨盆漏斗韧带后，如何处理子宫血管？  文档中描述了LAVH手术步骤中处理子宫血管的具体方法，取决于盆底情况。根据上下文： - 在[相似度: 0.548]片段中：“如果病人盆底比较松弛、子宫血管较易经阴道暴露者,则子宫血管没有必要由腹腔镜处理...但如果病人盆底不太松弛,阴道暴露受限,由腹腔镜处理子宫血管,经阴道手术者处理阴道部分,这样更可靠。” - 在[相似度: 0.488]片段中进一步说明：“按照操作步骤，接下去是子宫骶韧带和子宫血管的处理，即钳夹、切断、结扎。” 当盆底不松弛时，腹腔镜下处理的具体方法是：“用弯剪或剥离器钝性加锐性分离...子宫血管便会清楚地暴露出来。应在直视下用钛夹钳钉夹子宫血管并离断”。  因此，基于文档，在LAVH手术中处理完圆韧带和骨盆漏斗韧带后： - 如果盆底松弛，子宫血管可能经阴道处理（钳夹、切断、结扎）。 - 如果盆底不松弛，则在腹腔镜下用钛夹钳钉夹并离断子宫血管。 | A | A | A |
| **Question 199: 一名38岁的子宫内膜癌早期患者，术中探查卵巢未见异常。根据文本，对这类病人进行腹腔镜下广泛子宫切除术时，手术范围有何特殊考量？** | | | | |
| Chunk size=512, Overlap=0 Using TokenTextSplitter | 一名38岁的子宫内膜癌早期患者，术中探查卵巢未见异常。根据文本，对这类病人进行腹腔镜下广泛子宫切除术时，手术范围有何特殊考量？  基于文档内容，对于38岁（40岁以下）的子宫内膜癌早期患者，术中探查卵巢未见异常时，手术范围有特殊考量：可考虑保留一侧卵巢以维持女性生理功能。具体依据：  - 在[相似度: 0.658]片段中"第七节 腹腔镜下广泛子宫切除加盆腔淋巴结切除术"下的"三、手术范围"明确指出："对40岁以下的内膜癌病人若病变属早期, 仔细探查卵巢未见异常, 可考虑保留一侧卵巢以维持女性生理功能。"  - 在[相似度: 0.506]片段中也有相同描述："对40岁以下的内膜癌病人若病变属早期,仔细探查卵巢未见异常,可考虑保留一侧卵巢以维持女性生理功能。"  因此，手术范围包括广泛子宫切除和盆腔淋巴结切除，但针对此患者，可保留一侧卵巢（而非常规切除双侧附件），前提是病变早期且卵巢无异常。 | A | A | A |
| Chunk size=256, Overlap=100 Using SentenceSplitter | 一名38岁的子宫内膜癌早期患者，术中探查卵巢未见异常。根据文本，对这类病人进行腹腔镜下广泛子宫切除术时，手术范围有何特殊考量？  文档中针对年轻子宫内膜癌患者的卵巢保留有特殊考量。根据上下文： - 在[相似度: 0.696]片段中明确指出：“根据不同的疾病有不同的手术范围, 对 40 岁以下的内膜癌病人若病变属早期, 仔细探查卵巢未见异常, 可考虑保留一侧卵巢以维持女性生理功能。” - 在[相似度: 0.506]片段中重复了相同内容：“对40岁以下的内膜癌病人若病变属早期,仔细探查卵巢未见异常,可考虑保留一侧卵巢以维持女性生理功能。” - 该患者38岁（40岁以下），诊断为早期子宫内膜癌，术中探查卵巢未见异常，符合保留卵巢的条件。  因此，基于文档，手术范围的特殊考量是：可以保留一侧卵巢以维持女性生理功能，同时进行标准的广泛子宫切除术（包括子宫、输卵管和盆腔淋巴结切除），但需确保病变属早期且卵巢无异常。 | A | A | A |
| **Question 200: 在腹腔镜下广泛子宫切除术的初期探查阶段，如果发现盆腔淋巴结可疑并送快速冰冻病理检查，结果为阳性，那么后续的手术方案应如何调整？** | | | | |
| Chunk size=512, Overlap=0 Using TokenTextSplitter | 在腹腔镜下广泛子宫切除术的初期探查阶段，如果发现盆腔淋巴结可疑并送快速冰冻病理检查，结果为阳性，那么后续的手术方案应如何调整？  基于文档内容，在腹腔镜下广泛子宫切除术的初期探查阶段，如果盆腔淋巴结快速冰冻病理检查结果为阳性，后续手术方案应调整为放弃根治性子宫切除术，改为腹主动脉旁淋巴结取样以决定放射治疗的范围。具体依据：  - 在[相似度: 0.658]片段中"第七节 腹腔镜下广泛子宫切除加盆腔淋巴结切除术"下的"四、手术方法与技巧"描述："评估盆腔淋巴结有无明显转移:切除任何可疑的盆腔淋巴结并送术中快速冰冻病理切片检查。如果淋巴结转移阳性,则放弃根治性子宫切除术,改行腹主动脉旁淋巴结取样以决定放射治疗的范围。"  因此，调整方案是终止原计划的根治性子宫切除，转而进行腹主动脉旁淋巴结取样，为后续放疗提供依据。文档未提及其他调整（如化疗），仅强调放疗范围的确定。 | A | A | A |
| Chunk size=256, Overlap=100 Using SentenceSplitter | 在腹腔镜下广泛子宫切除术的初期探查阶段，如果发现盆腔淋巴结可疑并送快速冰冻病理检查，结果为阳性，那么后续的手术方案应如何调整？  文档中明确描述了盆腔淋巴结阳性时的后续手术方案调整。根据上下文： - 在[相似度: 0.534]片段中：“评估盆腔淋巴结有无明显转移:切除任何可疑的盆腔淋巴结并送术中快速冰冻病理切片检查。如果淋巴结转移阳性,则放弃根治性子宫切除术,改行腹主动脉旁淋巴结取样以决定放射治疗的范围。” - 在[相似度: 0.506]片段中重复了相同策略：“如果淋巴结转移阳性,则放弃根治性子宫切除术,改行腹主动脉旁淋巴结取样以决定放射治疗的范围。” - 这适用于腹腔镜下广泛子宫切除术的初期探查阶段，淋巴结阳性表明疾病可能已扩散，因此需调整方案以指导后续放疗。  因此，基于文档，后续手术方案应调整为：放弃根治性子宫切除术，改为进行腹主动脉旁淋巴结取样（以评估放疗范围），并根据结果制定放射治疗计划。 | A | B | A |

# Table 2 Responses Of All Evaluated Systems

| **RAG Systems** | **Response** | **Assessments** | | |
| --- | --- | --- | --- | --- |
| **Reviewer 1** | **Reviewer 2** | **Final** |
| **Question 1: HPV阳性高危型的检查流程是什么？** | | | | |
| Context Enrichment | HPV阳性高危型的检查流程是什么？  根据文档中的上下文信息（图1描述），HPV阳性高危型的检查流程如下：  - 起始点：患者高危型HPV检测结果为阳性（HPV(+)）。 - 第一级分流：  - 若已进行HPV分型检测：进入HPV分型结果路径。  - HPV16/18阳性：立即转诊阴道镜检查。  - HPV16/18阴性或其他12型阳性：进行宫颈细胞学检查。  - 若未进行分型检测（HPV不分型）：直接进入细胞学检查路径。 - 细胞学检查路径（适用于所有需细胞学分流的患者）：  - 细胞学检查结果≥ASC-US（包括ASC-US、LSIL、HSIL等异常）：转诊阴道镜检查。  - 细胞学检查结果阴性（-）：建议1年后重复细胞学+HPV联合检查。 - 特殊路径：  - 未分型HPV阳性患者：必须进行细胞学检查（无分型直接跳过）。  - 其他12型阳性且细胞学阴性：年度复查（不需阴道镜）。  此流程基于文档中的图1（相似度0.668和0.507部分），强调了分型与否对后续检查的指导作用。 | A | A | A |
| Contextual Chunk Headers | HPV阳性高危型的检查流程是什么？  基于文档片段1（块编号1，主题“HPV阳性及细胞学异常处理流程”）和文档片段6（块编号57，主题“宫颈癌筛查异常管理流程”），HPV阳性高危型的检查流程如下： - 起始点：患者高危型HPV检测结果为阳性（HPV(+)）。 - 第一级分流：  - 若已进行HPV分型检测：进入HPV分型结果路径。  - HPV16/18阳性：立即转诊阴道镜检查。  - HPV16/18阴性或其他12型阳性：进行宫颈细胞学检查。  - 若未进行分型检测（HPV不分型）：直接进入细胞学检查路径。 - 细胞学检查路径（适用于所有需细胞学分流的患者）：  - 细胞学检查结果≥ASC-US（包括ASC-US、LSIL、HSIL等异常）：转诊阴道镜检查。  - 细胞学检查结果阴性：建议1年后重复细胞学+HPV联合检查。 - 特殊路径：未分型HPV阳性患者必须进行细胞学检查；其他12型阳性且细胞学阴性者建议年度复查（不需阴道镜）。  此流程在文档片段6中进一步强调：以高危型HPV作为初筛时，HPV不分型需以细胞学检查分流；若分型检测中HPV16/18阳性，则直接转诊阴道镜（见图1流程）。 | A | A | A |
| Context Compression | HPV阳性高危型的检查流程是什么？  基于文档片段1（相关性: 1.000）、片段2（相关性: 0.900）和片段7（相关性: 0.700），高危型HPV阳性患者的检查流程如下：  - 起始点：患者高危型HPV检测结果为阳性（HPV(+)）。 - 第一级分流：  - 如果已进行HPV分型检测：  - HPV16/18阳性 → 立即转诊阴道镜检查（无需细胞学检查）。  - HPV16/18阴性或其他12型高危HPV阳性 → 进行宫颈细胞学检查。  - 如果未进行HPV分型检测（HPV不分型） → 直接进入细胞学检查路径（跳过HPV分型步骤）。 - 细胞学检查路径（适用于所有需细胞学分流的患者）：  - 细胞学检查结果≥ASC-US（包括ASC-US、LSIL、HSIL等异常） → 转诊阴道镜检查。  - 细胞学检查结果阴性（-） → 建议1年后重复细胞学+HPV联合检查。 - 特殊路径：  - 未分型HPV阳性患者必须进行细胞学检查。  - 其他12型高危HPV阳性且细胞学阴性 → 建议1年后复查（不需立即阴道镜）。  此流程在片段1中详细描述，并得到片段2和片段7的补充。整体流程强调以HPV分型结果和细胞学检查作为分流依据，确保及时转诊阴道镜或安排随访。 | A | A | A |
| CRAG | HPV阳性高危型的检查流程是什么？  知识库依据：图1 & 文本2.1   - 流程步骤：   1. 起始点：高危型HPV检测阳性（HPV+）。   2. 第一级分流：   - 若已做HPV分型检测 → 进入分型结果路径：   - HPV16/18阳性 → 立即转诊阴道镜检查。   - 其他12型阳性 → 进行宫颈细胞学检查。   - 若未分型检测（HPV不分型） → 直接进行细胞学检查。   3. 细胞学检查路径：   - 细胞学≥ASC-US（异常） → 转诊阴道镜。   - 细胞学阴性（-） → 1年后重复联合筛查（细胞学+HPV）。   4. 特殊路径：   - 未分型HPV阳性者 → 必须进行细胞学检查。   - 其他12型阳性且细胞学阴性 → 年度复查（无需阴道镜）。 | A | A | A |
| Document Augmentation | HPV阳性高危型的检查流程是什么？  根据文档片段1和5，高危型HPV阳性的处理流程如下：   - 起始点：高危型HPV检测结果为阳性（HPV(+)）。  - 第一级分流：   - 若已进行HPV分型检测：进入HPV分型结果路径。   - HPV16/18阳性：立即转诊阴道镜检查。   - HPV16/18阴性或其他12型阳性：进行宫颈细胞学检查。   - 若未进行分型检测（HPV不分型）：直接进入细胞学检查路径。  - 细胞学检查路径（适用于所有需细胞学分流的患者）：   - 细胞学检查结果≥ASC-US（包括ASC-US、LSIL、HSIL等异常）：转诊阴道镜检查。   - 细胞学检查结果阴性（-）：建议1年后重复细胞学+HPV联合检查。  - 特殊路径：   - 未分型HPV阳性患者：必须进行细胞学检查（无分型直接跳过）。   - 其他12型阳性且细胞学阴性：年度复查（不需阴道镜）。 | A | A | A |
| Fusion RAG | HPV阳性高危型的检查流程是什么？  根据上下文信息（文档1、文档2和文档6），HPV阳性高危型的检查流程如下：  - 起始点：患者高危型HPV检测结果为阳性（HPV(+)）。  - 第一级分流：   - 若已进行HPV分型检测：   - HPV16/18阳性 → 立即转诊阴道镜检查（无需细胞学检查）。   - HPV16/18阴性或其他12型阳性 → 进行宫颈细胞学检查。   - 若未进行分型检测（HPV不分型） → 直接进入细胞学检查路径。  - 细胞学检查路径（适用于所有需细胞学分流的患者）：   - 细胞学检查结果 ≥ ASC-US（包括ASC-US、LSIL、HSIL等异常） → 转诊阴道镜检查。   - 细胞学检查结果阴性（-） → 建议1年后重复细胞学+HPV联合检查。  - 特殊路径：   - 未分型HPV阳性患者 → 必须进行细胞学检查（跳过分型步骤）。   - 其他12型阳性且细胞学阴性 → 年度复查（不需阴道镜）。  此流程基于风险分层管理，强调分型检测的重要性（文档1图1和文档6）。如果未分型，优先以细胞学作为分流工具。 | A | A | A |
| HyDE | HPV阳性高危型的检查流程是什么？  回答：  根据文档中的图1描述（HyDE相似度: 0.757），高危型HPV阳性（HPV(+)）的检查流程如下：   1. 起始点：患者高危型HPV检测结果为阳性。  2. 第一级分流：   - 如果已进行HPV分型检测：进入HPV分型结果路径。   - 如果未进行分型检测（HPV不分型）：直接进入细胞学检查路径。  3. HPV分型路径：   - HPV16/18阳性：立即转诊阴道镜检查。   - HPV16/18阴性或其他12型阳性：进行宫颈细胞学检查。  4. 细胞学检查路径（适用于所有需细胞学分流的患者）：   - 细胞学检查结果≥ASC-US（包括ASC-US、LSIL、HSIL等异常）：转诊阴道镜检查。   - 细胞学检查结果阴性（-）：建议1年后重复细胞学+HPV联合检查。  5. 特殊路径：   - 未分型HPV阳性患者：必须进行细胞学检查（无分型直接跳过）。   - 其他12型阳性且细胞学阴性：年度复查（不需阴道镜）。   此流程基于图1的详细描述（文档片段：HyDE相似度: 0.757），并强调了分型检测的重要性。如果未分型，则以细胞学检查作为分流依据。 | A | A | A |
| Query Transformation | HPV阳性高危型的检查流程是什么？  根据文档片段1（相似度0.698）和文档片段5（相似度0.564），高危型HPV阳性患者的检查流程如下：  - 起始点：患者高危型HPV检测结果为阳性（HPV(+)）。 - 第一级分流：  - 如果已进行HPV分型检测：进入HPV分型结果路径。  - HPV16/18阳性：立即转诊阴道镜检查。  - HPV16/18阴性或其他12型阳性：进行宫颈细胞学检查。  - 如果未进行分型检测（HPV不分型）：直接进入细胞学检查路径。 - 细胞学检查路径（适用于所有需细胞学分流的患者）：  - 细胞学检查结果≥ASC-US（包括ASC-US、LSIL、HSIL等异常）：转诊阴道镜检查。  - 细胞学检查结果阴性（-）：建议1年后重复细胞学+HPV联合检查。 - 特殊路径：  - 未分型HPV阳性患者：必须进行细胞学检查（无分型直接跳过）。  - 其他12型阳性且细胞学阴性：年度复查（不需阴道镜）。  此流程在文档片段1的图1中详细描述，并得到文档片段5的补充（强调HPV不分型时以细胞学检查分流）。因此，整体流程基于分型状态和细胞学结果进行分流，最终决定是否需要阴道镜检查或复查。 | A | A | A |
| SelfRAG | HPV阳性高危型的检查流程是什么？  根据文档中的图1（高危型HPV阳性的处理流程）和相关描述，高危型HPV阳性患者的检查流程如下：  - 起始点：患者高危型HPV检测结果为阳性（HPV(+)）。 - 第一级分流：  - 如果已进行HPV分型检测：进入HPV分型结果路径。  - 如果未进行分型检测（HPV不分型）：直接进入细胞学检查路径。 - HPV分型路径：  - HPV16/18阳性：立即转诊阴道镜检查。  - HPV16/18阴性或其他12型阳性：进行宫颈细胞学检查。 - 细胞学检查路径（适用于所有需细胞学分流的患者）：  - 细胞学检查结果≥ASC-US（包括ASC-US、LSIL、HSIL等异常）：转诊阴道镜检查。  - 细胞学检查结果阴性（-）：建议1年后重复细胞学+HPV联合检查。 - 特殊路径：  - 未分型HPV阳性患者：必须进行细胞学检查（无分型直接跳过）。  - 其他12型阳性且细胞学阴性：年度复查（不需阴道镜）。  此流程在文档中明确描述（例如，图1部分："起始点：患者高危型HPV检测结果为阳性..."），并强调以细胞学检查作为分流依据，尤其当HPV未分型时。 | A | A | A |
| Semantic Chunking | HPV阳性高危型的检查流程是什么？  根据文档片段1（相似度0.698）和文档片段5（相似度0.564），高危型HPV阳性患者的检查流程如下： - 起始点：患者高危型HPV检测结果为阳性（HPV(+)）。 - 第一级分流：  - 如果已进行HPV分型检测：进入HPV分型结果路径。  - HPV16/18阳性：立即转诊阴道镜检查。  - HPV16/18阴性或其他12型阳性：进行宫颈细胞学检查。  - 如果未进行分型检测（HPV不分型）：直接进入细胞学检查路径。 - 细胞学检查路径（适用于所有需细胞学分流的患者）：  - 细胞学检查结果≥ASC-US（包括ASC-US、LSIL、HSIL等异常）：转诊阴道镜检查。  - 细胞学检查结果阴性（-）：建议1年后重复细胞学+HPV联合检查。 - 特殊路径：  - 未分型HPV阳性患者：必须进行细胞学检查（无分型直接跳过）。  - 其他12型阳性且细胞学阴性：年度复查（不需阴道镜）。  此流程在文档片段1的图1中详细描述，并得到文档片段5的补充（强调HPV不分型时以细胞学检查分流）。因此，整体流程基于分型状态和细胞学结果进行分流，最终决定是否需要阴道镜检查或复查。 | A | A | A |
| NaiveRAG | HPV阳性高危型的检查流程是什么？  基于文档内容，高危型HPV阳性的检查流程如下（主要依据第一个文档片段中的图1描述）：   - 起始点：患者高危型HPV检测结果为阳性（HPV(+)）。  - 第一级分流：   - 若已进行HPV分型检测：进入HPV分型结果路径。   - HPV16/18阳性：立即转诊阴道镜检查。   - HPV16/18阴性或其他12型阳性：进行宫颈细胞学检查。   - 若未进行分型检测（HPV不分型）：直接进入细胞学检查路径。  - 细胞学检查路径（适用于所有需细胞学分流的患者）：   - 细胞学检查结果≥ASC-US（包括ASC-US、LSIL、HSIL等异常）：转诊阴道镜检查。   - 细胞学检查结果阴性（-）：建议1年后重复细胞学+HPV联合检查。  - 特殊路径：   - 未分型HPV阳性患者：必须进行细胞学检查（跳过分型步骤）。   - 其他12型阳性且细胞学阴性：年度复查（不需阴道镜）。   此流程在多个文档片段中得到支持（例如，相似度0.668的片段详细描述了图1流程；相似度0.524的片段提到HPV阳性/细胞学阴性的管理）。流程强调分型检测的重要性，并根据分型结果和细胞学检查决定是否转诊阴道镜或复查。  关键依据：   - "图1：对于高危型HPV阳性患者应按照以下流程处理..."（相似度0.668）。  - "HPV 分型时HPV16、18阳性，立即转诊阴道镜..."（相似度0.524）。 | A | A | A |
| Rerank | HPV阳性高危型的检查流程是什么？  根据上下文信息，HPV阳性高危型的检查流程如下：   - 起始点：患者高危型HPV检测结果为阳性（HPV(+)）。  - 分流路径：   - 若已进行HPV分型检测：   - HPV16/18阳性 → 立即转诊阴道镜检查。   - HPV16/18阴性但其他12型高危HPV阳性 → 进行宫颈细胞学检查。   - 细胞学检查结果≥ASC-US（包括ASC-US、LSIL、HSIL等异常） → 转诊阴道镜检查。   - 细胞学检查结果阴性（-） → 建议1年后重复细胞学+HPV联合检查。   - 若未进行HPV分型检测（HPV不分型） → 直接进行细胞学检查。   - 细胞学检查结果≥ASC-US → 转诊阴道镜检查。   - 细胞学检查结果阴性 → 建议1年后重复细胞学+HPV联合检查。   依据：   - 文档片段2（相关性: 0.9771）详细描述了高危型HPV阳性患者的处理流程，包括分型路径和细胞学检查路径。  - 文档片段3（相关性: 0.9723）补充了细胞学+HPV联合检测结果异常的处理标准，与上述流程一致。   此流程适用于30岁以上女性（文档片段1提到高危型HPV检测作为初筛用于30岁以上女性），并强调规范化管理以避免漏诊或过度处理。 | A | B | A |
| RSE | HPV阳性高危型的检查流程是什么？  根据相关片段1（来自原始块0-1）的图1描述，高危型HPV阳性患者的检查流程如下： - 起始点：患者高危型HPV检测结果为阳性（HPV(+)）。 - 第一级分流：  - 若已进行HPV分型检测：  - HPV16/18阳性 → 立即转诊阴道镜检查。  - HPV16/18阴性或其他12型阳性 → 进行宫颈细胞学检查。  - 若未进行分型检测（HPV不分型） → 直接进入细胞学检查路径。 - 细胞学检查路径（适用于所有需细胞学分流的患者）：  - 细胞学检查结果≥ASC-US（包括ASC-US、LSIL、HSIL等异常） → 转诊阴道镜检查。  - 细胞学检查结果阴性（-） → 建议1年后重复细胞学+HPV联合检查。 - 特殊路径：  - 未分型HPV阳性患者 → 必须进行细胞学检查（无分型直接跳过）。  - 其他12型阳性且细胞学阴性 → 年度复查（不需阴道镜）。  综上，HPV阳性高危型的标准流程是：先根据是否分型进行分流；分型后，HPV16/18阳性直接转阴道镜，其他阳性或未分型则进行细胞学检查；细胞学异常转阴道镜，阴性则1年后复查。 | A | A | A |
| Non-RAG strategy | HPV阳性高危型的检查流程是什么  HPV阳性高危型的检查流程如下：   - 初始HPV高危阳性后，首先进行宫颈细胞学检查（如TCT）。  - 根据细胞学结果决定后续步骤：   - 如果细胞学阴性，建议12个月后复查HPV和细胞学。   - 如果细胞学结果为≥ASC-US（意义不明的鳞状细胞），推荐直接进行阴道镜检查。   - 如果HPV分型检测显示HPV 16/18阳性，无论细胞学结果如何，均推荐直接进行阴道镜检查。 | A | A | A |
| **Question 2: 当初始筛查显示HPV阳性伴高危HPV型别，强调HPV未分型时，下一步检查是什么？** | | | | |
| Context Enrichment | 当初始筛查显示HPV阳性伴高危HPV型别，强调HPV未分型时，下一步检查是什么？  根据文档中的上下文信息（图1的特殊路径部分）：  - 如果HPV未分型，下一步必须进行细胞学检查（无分型直接跳过）。 - 具体描述："未分型HPV阳性患者→必须进行细胞学检查（无分型直接跳过）"。  因此，下一步检查是宫颈细胞学检查。文档中未提及其他替代方案。 | B | A | A |
| Contextual Chunk Headers | 当初始筛查显示HPV阳性伴高危HPV型别，强调HPV未分型时，下一步检查是什么？  基于文档片段1（块编号1，主题“HPV阳性及细胞学异常处理流程”），当HPV阳性未分型时，下一步检查是必须进行细胞学检查。具体描述为： - “未分型HPV阳性患者→必须进行细胞学检查（无分型直接跳过）”。 - 在分流路径中，若未进行分型检测（HPV不分型），则直接进入细胞学检查路径，不涉及分型结果细分。  文档片段3（块编号59，主题“联合筛查异常管理指南”）也支持此点：HPV未分型检测时，建议结合临床症状和体征，必要时直接转诊阴道镜检查，但首要步骤是细胞学检查。 | A | A | A |
| Context Compression | 当初始筛查显示HPV阳性伴高危HPV型别，强调HPV未分型时，下一步检查是什么？  基于文档片段1（相关性: 1.000）和片段7（相关性: 0.700），当初始筛查显示高危型HPV阳性但未进行分型检测（即HPV未分型）时，下一步检查是直接进行宫颈细胞学检查。  - 片段1明确指出：“未分型HPV阳性患者→必须进行细胞学检查（无分型直接跳过）”，意思是跳过HPV分型路径，直接进入细胞学检查路径。 - 片段7强调：“以高危型HPV作为初筛HPV阳性时的处理强调HPV不分型时，以细胞学检查分流”。 - 文档中没有支持直接转诊阴道镜作为下一步的普遍建议（尽管片段2在特定条件下提到，但该片段针对的是细胞学异常情况，不适用于此问题）。因此，核心下一步是细胞学检查。 | A | A | A |
| CRAG | HPV未分型阳性时，下一步检查是什么？  知识库依据：图1 & 文本2.1   - 必须进行宫颈细胞学检查（无论是否已分型）。   - 若细胞学≥ASC-US → 转诊阴道镜。   - 若细胞学阴性 → 1年后重复联合筛查。 | C | B | B |
| Document Augmentation | 当初始筛查显示HPV阳性伴高危HPV型别，强调HPV未分型时，下一步检查是什么？  根据文档片段1和5，若HPV阳性但未分型，下一步必须进行细胞学检查（直接进入细胞学检查路径）。细胞学结果决定后续操作：   - 细胞学≥ASC-US：转诊阴道镜检查。  - 细胞学阴性：建议1年后重复联合检查（细胞学+HPV）。 | A | A | A |
| Fusion RAG | 当初始筛查显示HPV阳性伴高危HPV型别，强调HPV未分型时，下一步检查是什么？  根据上下文信息（文档1和文档2）：  - 如果HPV检测未分型（即强调HPV未分型），下一步必须进行细胞学检查（文档1特殊路径：未分型HPV阳性患者→必须进行细胞学检查）。  - 文档2补充：如果没有分型检测，建议结合临床症状和体征（如异常出血），必要时直接转诊阴道镜检查，但细胞学检查是标准初始步骤（文档2：HPV未分型检测（+）时，建议结合临床症状和体征，必要时直接转诊阴道镜检查）。  因此，下一步检查是 宫颈细胞学检查。如果细胞学结果异常（≥ASC-US），则转诊阴道镜；如果阴性，则进入复查路径。 | A | A | A |
| HyDE | 当初始筛查显示HPV阳性伴高危HPV型别，强调HPV未分型时，下一步检查是什么？  回答：  根据文档中的图1描述（HyDE相似度: 0.757），当HPV阳性但未分型时，下一步检查是必须进行细胞学检查。具体路径为：   - 未分型HPV阳性患者→直接进入细胞学检查路径。  - 细胞学检查结果将决定后续步骤：   - 如果细胞学≥ASC-US，则转诊阴道镜检查。   - 如果细胞学阴性，则建议1年后重复细胞学+HPV联合检查。   此信息直接来自文档的“特殊路径”部分（HyDE相似度: 0.757），并得到其他片段（如HyDE相似度: 0.577）的佐证，强调HPV未分型时以细胞学分流。 | A | A | A |
| Query Transformation | 当初始筛查显示HPV阳性伴高危HPV型别，强调HPV未分型时，下一步检查是什么？  根据文档片段1（相似度0.698）和文档片段4（相似度0.572），当HPV阳性但未分型时，下一步检查是直接进行宫颈细胞学检查：  - 文档片段1明确指出：“若未进行分型检测（HPV不分型）→直接进入细胞学检查路径”。 - 文档片段4在联合检测流程中补充：“若HPV未分型检测阳性：则应直接转诊阴道镜”，但这是在细胞学+HPV联合检测的上下文中（图3）。然而，在初始筛查强调HPV未分型时，文档片段1的流程优先进行细胞学检查作为分流。 - 文档片段2（相似度0.592）提到：“HPV没有分型检测，建议结合临床症状和体征，必要时直接转诊阴道镜检查”，但这仅作为补充建议，并非标准路径。核心流程仍以细胞学检查为主。  因此，下一步检查是进行宫颈细胞学检查，根据其结果决定后续行动（如转诊阴道镜或复查）。 | A | A | A |
| SelfRAG | 当初始筛查显示HPV阳性伴高危HPV型别，强调HPV未分型时，下一步检查是什么？  根据文档中的图1和相关说明，当初始筛查显示HPV阳性但未进行分型检测（即HPV未分型）时，下一步必须进行细胞学检查。具体描述如下：  - 在HPV分型路径中："若未进行分型检测（HPV不分型）→直接进入细胞学检查路径"。 - 特殊路径部分："未分型HPV阳性患者→必须进行细胞学检查"。 - 文档还强调："HPV不分型时，以细胞学检查分流"（见"2.1 以高危型HPV作为初筛HPV阳性时的处理"部分）。  因此，下一步检查是进行宫颈细胞学检查。 | A | A | A |
| Semantic Chunking | 当初始筛查显示HPV阳性伴高危HPV型别，强调HPV未分型时，下一步检查是什么？  根据文档片段1（相似度0.698）和文档片段4（相似度0.572），当HPV阳性但未分型时，下一步检查是直接进行宫颈细胞学检查： - 文档片段1明确指出：“若未进行分型检测（HPV不分型）→直接进入细胞学检查路径”。 - 文档片段4在联合检测流程中补充：“若HPV未分型检测阳性：则应直接转诊阴道镜”，但这是在细胞学+HPV联合检测的上下文中（图3）。然而，在初始筛查强调HPV未分型时，文档片段1的流程优先进行细胞学检查作为分流。 - 文档片段2（相似度0.592）提到：“HPV没有分型检测，建议结合临床症状和体征，必要时直接转诊阴道镜检查”，但这仅作为补充建议，并非标准路径。核心流程仍以细胞学检查为主。  因此，下一步检查是进行宫颈细胞学检查，根据其结果决定后续行动（如转诊阴道镜或复查）。 | A | A | A |
| NaiveRAG | 当初始筛查显示HPV阳性伴高危HPV型别，强调HPV未分型时，下一步检查是什么？  当初始筛查显示HPV阳性但未分型时，下一步检查是直接进行宫颈细胞学检查。文档明确指出，如果HPV检测未分型，患者应跳过分型步骤，立即进入细胞学检查路径。细胞学检查结果将决定后续处理：   - 如果细胞学≥ASC-US，转诊阴道镜检查。  - 如果细胞学阴性，建议1年后复查联合检测（细胞学+HPV）。   此处理基于风险分层：未分型HPV阳性被视为较高风险，需细胞学分流以评估是否需要阴道镜。   关键依据：   - "若未进行分型检测（HPV不分型）→直接进入细胞学检查路径"（相似度0.668）。  - "HPV 没有分型检测，建议结合临床症状和体征，必要时直接转诊阴道镜检查"（相似度0.524），但文档强调"必要时"仅当症状存在时；一般情况下，未分型阳性优先进行细胞学检查。 | A | A | A |
| Rerank | 当初始筛查显示HPV阳性伴高危HPV型别，强调HPV未分型时，下一步检查是什么？  当初始筛查显示HPV阳性伴高危HPV型别，且强调HPV未分型时，下一步检查是直接进行宫颈细胞学检查。   依据：   - 文档片段2（相关性: 0.9771）明确指出："若未进行分型检测（HPV不分型）→直接进入细胞学检查路径"。  - 文档片段1（相关性: 0.9878）也提到："HPV不分型时，以细胞学检查分流"。   此步骤是标准流程的一部分，用于进一步评估风险，并根据细胞学结果决定是否转诊阴道镜。 | A | B | A |
| RSE | 当初始筛查显示HPV阳性伴高危HPV型别，强调HPV未分型时，下一步检查是什么？  根据相关片段1（来自原始块0-1）的图1描述，在“特殊路径”部分明确指出： - “未分型HPV阳性患者→必须进行细胞学检查（无分型直接跳过）”。 此外，相关片段2（来自原始块58-60）的图3部分也提到：对于HPV未分型检测阳性，建议结合临床症状和体征，必要时直接转诊阴道镜检查，但首要步骤是进行细胞学检查。  因此，当初始筛查显示HPV阳性伴高危HPV型别且强调HPV未分型时，下一步检查是必须进行宫颈细胞学检查。 | A | A | A |
| Non-RAG strategy | 当初始筛查显示HPV阳性伴高危HPV型别，强调HPV未分型时，下一步检查是什么  当HPV阳性高危型未分型时，下一步应优先进行HPV分型测试，以明确具体高危型别（尤其是HPV16/18）。分型结果将指导后续管理：如果分型为HPV16/18阳性，则转诊阴道镜检查；如果非HPV16/18，则结合细胞学结果决定。 | D | D | D |
| **Question 3: 当初始筛查显示HPV阳性伴高危HPV型别且细胞学检查结果为阴性时，这表明什么？是否应该定期复查，如果是，频率应该是多少？** | | | | |
| Context Enrichment | 当初始筛查显示HPV阳性伴高危HPV型别且细胞学检查结果为阴性时，这表明什么？是否应该定期复查，如果是，频率应该是多少？  根据文档中的上下文信息（图1的细胞学检查路径和图3的描述）：  - 这表明什么：细胞学检查结果为阴性但HPV阳性，表明患者存在HPV感染但无细胞学异常，属于低风险状态，但需要监测以防进展。 - 是否应该定期复查：是的，应该定期复查。 - 复查频率：建议1年后重复细胞学+HPV联合检查。  - 具体描述："细胞学检查结果阴性（-）→建议1年后重复细胞学+HPV联合检查"（图1）。  - 图3中也提到："细胞学（-）& HPV（+）→则应进行1年复查（1年后重复联合检测）"。  文档中未指定更短或更长的复查间隔，因此频率为1年后。 | A | A | A |
| Contextual Chunk Headers | 当初始筛查显示HPV阳性伴高危HPV型别且细胞学检查结果为阴性时，这表明什么？是否应该定期复查，如果是，频率应该是多少？  基于文档片段1（块编号1，主题“HPV阳性及细胞学异常处理流程”）和文档片段3（块编号59，主题“联合筛查异常管理指南”）： - 这表明什么：细胞学检查结果为阴性时，表明当前宫颈病变风险较低，但HPV阳性状态提示存在持续感染或潜在风险，需进一步监测以排除进展可能。文档片段3提到，HPV阳性/细胞学阴性的5年CINⅢ+累积风险较低，但需根据分型情况细化管理。 - 是否应该定期复查：是，应该定期复查。 - 复查频率：建议1年后重复细胞学+HPV联合检查。文档片段1明确说明：“细胞学检查结果阴性（-）→建议1年后重复细胞学+HPV联合检查”。文档片段3的图3流程也显示：“细胞学(-) & HPV(+) → 1年复查（1年后重复联合检测）”。如果HPV分型为其他12型阳性（非16/18），则年度复查即可；若未分型，复查频率相同。 | A | A | A |
| Context Compression | 当初始筛查显示HPV阳性伴高危HPV型别且细胞学检查结果为阴性时，这表明什么？是否应该定期复查，如果是，频率应该是多少？  基于文档片段1（相关性: 1.000）、片段2（相关性: 0.900）和片段3（相关性: 0.800）：  - 这表明什么：细胞学阴性但高危型HPV阳性表明患者存在HPV持续感染的风险，但当前无明显的细胞学异常。这通常被视为低风险或需监测的状态，因为HPV感染可能自行消退或进展，需要定期随访以评估是否发展为高级别病变（如CIN或宫颈癌）。文档片段1和片段2均描述此情况需复查，片段3进一步说明需结合HPV分型结果（如非HPV16/18阳性时风险较低）。 - 是否应该定期复查：是，应该定期复查。 - 复查频率：建议1年后重复细胞学+HPV联合检查。  - 片段1：细胞学检查结果阴性 → 建议1年后重复细胞学+HPV联合检查。  - 片段2：细胞学（-）& HPV（+） → 则应进行1年复查（1年后重复联合检测）。  - 片段3表格也支持：HPV未分型阳性或HPV16/18阴性但其他12型阳性时，细胞学阴性者进行“常规筛查1年复查”。 | A | A | A |
| CRAG | HPV阳性高危型 + 细胞学阴性时，如何处理？  知识库依据：图3 & 文本2.3.3   - 需结合HPV分型结果：   - 若分型为其他12型阳性 → 建议 1年后复查（重复联合检测）。   - 若未分型检测 → 建议结合临床症状，必要时 直接转诊阴道镜（因我国细胞学质量不均，需谨慎）。  - 复查频率：1年1次（联合筛查）。 | A | A | A |
| Document Augmentation | 当初始筛查显示HPV阳性伴高危HPV型别且细胞学检查结果为阴性时，这表明什么？是否应该定期复查，如果是，频率应该是多少？  根据文档片段1、3和4：   - 这表明患者为“HPV阳性/细胞学阴性”状态，其5年CINⅢ+的累积风险较低（但未明确具体数值，文档片段3提到类似情况风险低于阈值）。  - 需要定期复查：建议1年后重复细胞学+HPV联合检查（年度复查）。  - 若HPV分型为其他12型阳性（非16/18）且细胞学阴性，也推荐1年后复查（文档片段1）。 | A | A | A |
| Fusion RAG | 当初始筛查显示HPV阳性伴高危HPV型别且细胞学检查结果为阴性时，这表明什么？是否应该定期复查，如果是，频率应该是多少？  根据上下文信息（文档1、文档4和文档2）：  - 这表明什么：HPV阳性但细胞学阴性表明患者处于较低风险状态，但并非无风险。文档1指出，这通常表示未进展为高级别病变（如CIN II/III），但需监测以防潜在进展（文档1：细胞学阴性→建议1年后复查；文档4：细胞学（-）&HPV（+）则应进行1年复查）。  - 是否应该定期复查：是的，应该定期复查。  - 复查频率：建议 1年后重复细胞学+HPV联合检查（文档1细胞学检查路径和文档4）。文档1特殊路径也提到“其他12型阳性且细胞学阴性→年度复查”，强调年度复查（即每1年一次）是标准频率。 | A | A | A |
| HyDE | 当初始筛查显示HPV阳性伴高危HPV型别且细胞学检查结果为阴性时，这表明什么？是否应该定期复查，如果是，频率应该是多少？  回答：  根据文档中的图1和图3描述（HyDE相似度: 0.757 和 HyDE相似度: 0.585）：   - 这表明什么：HPV阳性但细胞学阴性表明患者处于较低风险状态，但仍有潜在病变风险（如5年CIN III+累积风险较低，但需监测）。文档提到，HPV阳性/细胞学阴性的风险低于阈值（0.08% vs. 0.26%），提示无需立即干预，但需随访以防进展。  - 是否应该定期复查：是，应该定期复查。  - 复查频率：建议1年后重复细胞学+HPV联合检查。具体路径：   - 如果HPV分型检测为HPV16/18阴性或其他12型阳性且细胞学阴性：年度复查（文档片段：HyDE相似度: 0.757）。   - 如果HPV未分型且细胞学阴性：同样建议1年后复查（文档片段：HyDE相似度: 0.585）。   此信息基于图1的“细胞学检查路径”和图3的联合检测结果处理（HyDE相似度: 0.585），强调年度复查以监测变化。 | A | B | A |
| Query Transformation | 当初始筛查显示HPV阳性伴高危HPV型别且细胞学检查结果为阴性时，这表明什么？是否应该定期复查，如果是，频率应该是多少？  根据文档片段1（相似度0.698）、文档片段2（相似度0.592）和文档片段4（相似度0.572）：  - 这表明什么：HPV阳性但细胞学阴性表明患者存在高危HPV感染，但当前无细胞学异常，风险相对较低。文档片段2提到，HPV阳性/细胞学阴性的5年CINⅢ+累积风险较低（具体数值未在片段中给出），但需要监测以防进展。 - 是否应该定期复查：是的，应该定期复查。 - 复查频率：建议1年后重复细胞学+HPV联合检查。  - 文档片段1：细胞学检查结果阴性（-）→建议1年后重复细胞学+HPV联合检查。  - 文档片段4：细胞学（-）& HPV（+）→则应进行1年复查（1年后重复联合检测）。  - 文档片段2在HPV分型路径中补充：HPV16/18阴性或其他12型阳性且细胞学阴性→年度复查。  因此，复查频率为1年一次，使用细胞学和HPV联合检测进行监测。 | A | A | A |
| SelfRAG | 当初始筛查显示HPV阳性伴高危HPV型别且细胞学检查结果为阴性时，这表明什么？是否应该定期复查，如果是，频率应该是多少？  根据文档中的图1和图3处理流程：  - 这表明什么：HPV阳性但细胞学阴性表明患者存在高危HPV感染，但当前宫颈细胞学未见异常。文档中提到，这种组合的风险较低（例如，在风险讨论部分："HPV阳性/细胞学阴性"的风险未达到立即转诊阈值），但仍需监测以排除潜在进展。 - 是否应该定期复查：是的，应该定期复查。 - 复查频率：建议1年后重复细胞学+HPV联合检查。具体描述如下：  - 图1路径："细胞学检查结果阴性（-）→建议1年后重复细胞学+HPV联合检查"。  - 图3路径："细胞学（-）& HPV（+）→1年复查（1年后重复联合检测）"。  - 文档还补充："其他12型阳性且细胞学阴性→年度复查"（见图1特殊路径）。  因此，复查频率为1年后进行重复联合检测。 | A | A | A |
| Semantic Chunking | 当初始筛查显示HPV阳性伴高危HPV型别且细胞学检查结果为阴性时，这表明什么？是否应该定期复查，如果是，频率应该是多少？  根据文档片段1（相似度0.698）、文档片段2（相似度0.592）和文档片段4（相似度0.572）： - 这表明什么：HPV阳性但细胞学阴性表明患者存在高危HPV感染，但当前无细胞学异常，风险相对较低。文档片段2提到，HPV阳性/细胞学阴性的5年CINⅢ+累积风险较低（具体数值未在片段中给出），但需要监测以防进展。 - 是否应该定期复查：是的，应该定期复查。 - 复查频率：建议1年后重复细胞学+HPV联合检查。  - 文档片段1：细胞学检查结果阴性（-）→建议1年后重复细胞学+HPV联合检查。  - 文档片段4：细胞学（-）& HPV（+）→则应进行1年复查（1年后重复联合检测）。  - 文档片段2在HPV分型路径中补充：HPV16/18阴性或其他12型阳性且细胞学阴性→年度复查。  因此，复查频率为1年一次，使用细胞学和HPV联合检测进行监测。 | A | A | A |
| NaiveRAG | 当初始筛查显示HPV阳性伴高危HPV型别且细胞学检查结果为阴性时，这表明什么？是否应该定期复查，如果是，频率应该是多少？  这表明什么：HPV阳性但细胞学阴性表明患者处于低风险状态，但并非无风险。文档解释，这通常代表HPV感染可能为一过性，癌变风险较低（5年CINⅢ+累积风险低于阈值），但需监测以防进展。  - 是否应该定期复查：是的，必须定期复查。  - 复查频率：1年后重复细胞学+HPV联合检查。如果复查结果正常，可转为常规筛查；如果异常，则根据结果转诊阴道镜。   文档强调，HPV阳性/细胞学阴性患者中，如果HPV分型为其他12型（非16/18），风险更低，只需年度复查；但如果未分型或症状可疑，复查频率不变。   关键依据：   - "细胞学检查结果阴性（-）→建议1年后重复细胞学+HPV联合检查"（相似度0.668）。  - "细胞学（-）& HPV（+） 则应进行1年复查（1年后重复联合检测）"（相似度0.507）。  - "HPV 阳性 /细胞学阴性...建议1年复查"（相似度0.524）。 | A | A | A |
| Rerank | 当初始筛查显示HPV阳性伴高危HPV型别且细胞学检查结果为阴性时，这表明什么？是否应该定期复查，如果是，频率应该是多少？  这表明什么：HPV阳性高危型且细胞学检查结果为阴性时，表明患者存在HPV感染但无当前细胞学异常，风险相对较低（5年CINⅢ+的累积风险未在上下文中明确量化，但文档片段8提到HPV阳性/细胞学阴性的风险低于某些阈值）。然而，由于HPV感染可能持续或进展，仍需监测以避免潜在病变。  - 是否应该定期复查：是，应该定期复查。  - 复查频率：建议1年后重复细胞学和HPV联合检查。   依据：   - 文档片段2（相关性: 0.9771）："细胞学检查结果阴性（-）→建议1年后重复细胞学+HPV联合检查"。  - 文档片段3（相关性: 0.9723）："细胞学（-）& HPV（+） 则应进行1年复查（1年后重复联合检测）"。  - 文档片段8（相关性: 0.7004）也支持此复查频率，强调在细胞学阴性时进行年度复查。   复查的目的是监测HPV清除或病变进展，确保早期干预。 | A | A | A |
| RSE | 当初始筛查显示HPV阳性伴高危HPV型别且细胞学检查结果为阴性时，这表明什么？是否应该定期复查，如果是，频率应该是多少？  根据相关片段1（来自原始块0-1）的图1描述，在细胞学检查路径中： - “细胞学检查结果阴性（-）→建议1年后重复细胞学+HPV联合检查”。 此外，相关片段2（来自原始块58-60）的图3部分也明确：对于“细胞学（-）& HPV（+）→则应进行1年复查（1年后重复联合检测）”。  这表明： - 风险水平：细胞学阴性但HPV阳性表明患者有较低风险（相关片段2提到，HPV阳性/细胞学阴性的5年CINⅢ+累积风险未直接给出，但低于需要立即干预的阈值），但仍需监测以排除潜在病变进展。 - 是否应该定期复查：是的，应该定期复查。 - 复查频率：1年后重复细胞学+HPV联合检测（即年度复查）。 | A | A | A |
| Non-RAG strategy | 当初始筛查显示HPV阳性伴高危HPV型别且细胞学检查结果为阴性时，这表明什么  是否应该定期复查，如果是，频率应该是多少？   - 这表明患者处于低风险状态，但存在持续性HPV感染可能，宫颈高级别病变风险较低（<5%）。   -应定期复查。复查频率为12个月后进行联合筛查（HPV检测和细胞学检查）。如果复查结果阴性，可延长至3年一次；如果仍阳性，需进一步评估。 | A | A | A |
| **Question 4: 当初始筛查显示HPV阳性伴高危HPV型别且细胞学检查结果≥ASC-US（意义不明的鳞状细胞）时，下一步是否应该进行阴道镜检查？** | | | | |
| Context Enrichment | 当初始筛查显示HPV阳性伴高危HPV型别且细胞学检查结果≥ASC-US（意义不明的鳞状细胞）时，下一步是否应该进行阴道镜检查？  根据文档中的上下文信息（图1的细胞学检查路径）：  - 细胞学检查结果≥ASC-US（包括ASC-US、LSIL、HSIL等异常）时，应转诊阴道镜检查。 - 具体描述："细胞学检查结果≥ASC-US→转诊阴道镜检查"。  因此，下一步应该进行阴道镜检查。文档中未提供例外情况。 | A | A | A |
| Contextual Chunk Headers | 当初始筛查显示HPV阳性伴高危HPV型别且细胞学检查结果≥ASC-US（意义不明的鳞状细胞）时，下一步是否应该进行阴道镜检查？  基于文档片段1（块编号1，主题“HPV阳性及细胞学异常处理流程”）和文档片段5（块编号58，主题“细胞学异常处理指南”），下一步应该进行阴道镜检查。具体依据： - 文档片段1：在细胞学检查路径中，“细胞学检查结果≥ASC-US（包括ASC-US、LSIL、HSIL等异常）→转诊阴道镜检查”。 - 文档片段5：针对ASC-US的处理，强调“如果HPV阳性（+）→转诊阴道镜检查”，并指出ASC-US患者HPV阳性时需直接转诊阴道镜，无需额外分流。  因此，无论HPV分型状态如何，细胞学结果≥ASC-US结合HPV阳性均需转诊阴道镜。 | A | A | A |
| Context Compression | 当初始筛查显示HPV阳性伴高危HPV型别且细胞学检查结果≥ASC-US（意义不明的鳞状细胞）时，下一步是否应该进行阴道镜检查？  基于文档片段1（相关性: 1.000）和片段2（相关性: 0.900），是的，下一步应该进行阴道镜检查。  - 片段1明确说明：“细胞学检查结果≥ASC-US（包括ASC-US、LSIL、HSIL等异常）→转诊阴道镜检查”。 - 片段2补充：“细胞学 ≥ ASC-US & HPV（+） → 则应进行进一步分诊”，并指出在HPV分型细分后，如果未分型则直接转诊阴道镜；但总体上，细胞学≥ASC-US时，无论HPV分型如何，均需转诊阴道镜作为标准处理。 - 文档中无例外情况，因此阴道镜检查是必要的下一步。 | A | A | A |
| CRAG | HPV阳性 + 细胞学≥ASC-US时，是否需阴道镜检查？  知识库依据：图1、图3 & 文本2.3.2   - 必须转诊阴道镜检查。   - 共识明确：HPV阳性/ASC-US的5年CINⅢ+累积风险达6.8%，高于LSIL风险，需直接阴道镜评估。 | A | A | A |
| Document Augmentation | 当初始筛查显示HPV阳性伴高危HPV型别且细胞学检查结果≥ASC-US（意义不明的鳞状细胞）时，下一步是否应该进行阴道镜检查？  是的。根据文档片段1、2和3：   - 细胞学结果≥ASC-US（包括ASC-US、LSIL、HSIL等）且HPV阳性时，应直接转诊阴道镜检查。  - 文档片段3特别指出：HPV阳性/ASC-US的5年CINⅢ+累积风险为6.8%，支持直接转诊阴道镜。 | A | A | A |
| Fusion RAG | 当初始筛查显示HPV阳性伴高危HPV型别且细胞学检查结果≥ASC-US（意义不明的鳞状细胞）时，下一步是否应该进行阴道镜检查？  根据上下文信息（文档1和文档2）：  - 是的，下一步应该进行阴道镜检查。  - 文档1明确：细胞学检查结果≥ASC-US（包括ASC-US、LSIL、HSIL等异常）→转诊阴道镜检查（文档1细胞学检查路径）。  - 文档2支持：HPV阳性/ASC-US的5年CIN III+累积风险较高（6.8%），依据同等风险同等管理原则，支持直接转诊阴道镜（文档2：2.3.2 HPV阳性/ASC-US支持直接转诊阴道镜）。  因此，无论HPV分型如何，细胞学≥ASC-US均需转诊阴道镜。 | A | B | A |
| HyDE | 当初始筛查显示HPV阳性伴高危HPV型别且细胞学检查结果≥ASC-US（意义不明的鳞状细胞）时，下一步是否应该进行阴道镜检查？  回答：  是，下一步应该进行阴道镜检查。  根据文档中的图1描述（HyDE相似度: 0.757）：   - 在细胞学检查路径中，细胞学结果≥ASC-US（包括ASC-US、LSIL、HSIL等异常）→转诊阴道镜检查。  - 此规则适用于所有HPV阳性患者，无论是否分型，只要细胞学≥ASC-US，均需转诊阴道镜。   此信息直接来自文档的明确流程（HyDE相似度: 0.757），并得到其他片段（如HyDE相似度: 0.592）的支持，其中提到阴道镜检查指征包括筛查结果异常。 | A | A | A |
| Query Transformation | 当初始筛查显示HPV阳性伴高危HPV型别且细胞学检查结果≥ASC-US（意义不明的鳞状细胞）时，下一步是否应该进行阴道镜检查？  是的，应该进行阴道镜检查。依据来自文档片段1（相似度0.698）和文档片段2（相似度0.592）：  - 文档片段1：在细胞学检查路径中，“细胞学检查结果≥ASC-US（包括ASC-US、LSIL、HSIL等异常）→转诊阴道镜检查”。 - 文档片段2：专门针对HPV阳性/ASC-US的情况，“其5年CINⅢ+的累积风险为6.8%，高于LSIL风险，依据同等风险同等管理，支持直接转诊阴道镜”。 - 文档片段4（相似度0.572）在联合检测流程中也确认：细胞学 ≥ ASC-US & HPV（+）→则应进行进一步分诊，但最终指向阴道镜检查（尤其当HPV分型阳性或未分型时）。  因此，基于文档内容，下一步应直接转诊阴道镜检查，无需额外分流。 | A | A | A |
| SelfRAG | 当初始筛查显示HPV阳性伴高危HPV型别且细胞学检查结果≥ASC-US（意义不明的鳞状细胞）时，下一步是否应该进行阴道镜检查？  是的，根据文档中的图1和图3处理流程，当HPV阳性且细胞学检查结果≥ASC-US时，下一步应转诊阴道镜检查。具体描述如下：  - 图1细胞学检查路径："细胞学检查结果≥ASC-US（包括ASC-US、LSIL、HSIL等异常）→转诊阴道镜检查"。 - 图3路径："细胞学 ≥ ASC-US & HPV（+）→应进行进一步分诊"，但在HPV未分型情况下直接转诊阴道镜；即使分型，细胞学≥ASC-US通常也指向阴道镜检查（例如，在HPV分型阴性时仍需根据细胞学结果处理）。 - 文档还强调："HPV阳性/ASC-US...支持直接转诊阴道镜"（见风险讨论部分）。  因此，无论HPV分型状态如何，细胞学≥ASC-US结合HPV阳性均需转诊阴道镜检查。 | B | A | A |
| Semantic Chunking | 当初始筛查显示HPV阳性伴高危HPV型别且细胞学检查结果≥ASC-US（意义不明的鳞状细胞）时，下一步是否应该进行阴道镜检查？  是的，应该进行阴道镜检查。依据来自文档片段1（相似度0.698）和文档片段2（相似度0.592）： - 文档片段1：在细胞学检查路径中，“细胞学检查结果≥ASC-US（包括ASC-US、LSIL、HSIL等异常）→转诊阴道镜检查”。 - 文档片段2：专门针对HPV阳性/ASC-US的情况，“其5年CINⅢ+的累积风险为6.8%，高于LSIL风险，依据同等风险同等管理，支持直接转诊阴道镜”。 - 文档片段4（相似度0.572）在联合检测流程中也确认：细胞学 ≥ ASC-US & HPV（+）→则应进行进一步分诊，但最终指向阴道镜检查（尤其当HPV分型阳性或未分型时）。  因此，基于文档内容，下一步应直接转诊阴道镜检查，无需额外分流。 | A | A | A |
| NaiveRAG | 当初始筛查显示HPV阳性伴高危HPV型别且细胞学检查结果≥ASC-US（意义不明的鳞状细胞）时，下一步是否应该进行阴道镜检查？  是的，下一步应该立即转诊阴道镜检查。文档明确指出，无论HPV分型结果如何，细胞学检查结果≥ASC-US（包括ASC-US、LSIL、HSIL等异常）均需直接转诊阴道镜，以评估是否存在高级别病变或癌变风险。   此处理基于高风险证据：HPV阳性联合细胞学≥ASC-US时，5年CINⅢ+累积风险较高（文档提到约6.8%），支持直接阴道镜检查。   关键依据：   - "细胞学检查结果≥ASC-US（包括ASC-US、LSIL、HSIL等异常）→转诊阴道镜检查"（相似度0.668）。  - "HPV 阳性 /ASC-US...依据同等风险同等管理，支持直接转诊阴道镜"（相似度0.524）。 | A | B | A |
| Rerank | 当初始筛查显示HPV阳性伴高危HPV型别且细胞学检查结果≥ASC-US（意义不明的鳞状细胞）时，下一步是否应该进行阴道镜检查？  是，下一步应该进行阴道镜检查。   依据：   - 文档片段2（相关性: 0.9771）明确说明："细胞学检查结果≥ASC-US（包括ASC-US、LSIL、HSIL等异常）→转诊阴道镜检查"。  - 文档片段3（相关性: 0.9723）进一步确认："细胞学 ≥ ASC-US & HPV（+） 则应进行进一步分诊... 若HPV未分型检测阳性：则应直接转诊阴道镜"。  - 文档片段4（相关性: 0.9493）也提到类似处理，支持转诊阴道镜。   此步骤基于细胞学异常（≥ASC-US）与HPV阳性结合，提示较高风险，需阴道镜评估以排除高级别病变。 | A | A | A |
| RSE | 当初始筛查显示HPV阳性伴高危HPV型别且细胞学检查结果≥ASC-US（意义不明的鳞状细胞）时，下一步是否应该进行阴道镜检查？  根据相关片段1（来自原始块0-1）的图1描述，在细胞学检查路径中： - “细胞学检查结果≥ASC-US（包括ASC-US、LSIL、HSIL等异常）→转诊阴道镜检查”。 此外，相关片段2（来自原始块58-60）的图3部分也支持：对于“细胞学 ≥ ASC-US & HPV（+） → 则应进行进一步分诊”，但最终无论HPV分型如何，细胞学≥ASC-US且HPV阳性均需转诊阴道镜（例如，在HPV未分型时直接转诊）。  因此，下一步应该进行阴道镜检查。 | A | B | A |
| Non-RAG strategy | 当初始筛查显示HPV阳性伴高危HPV型别且细胞学检查结果≥ASC-US（意义不明的鳞状细胞）时，下一步是否应该进行阴道镜检查  是的， HPV阳性高危型伴细胞学≥ASC-US时，应立即转诊阴道镜检查，因为此类组合提示宫颈高级别鳞状上皮内病变（HSIL）风险显著增加（约10-20%）。 | A | A | A |
| **Question 5: 当初始筛查显示HPV阳性伴高危HPV型别，经分型检查发现为HPV16/18阳性时，下一步是否应该进行阴道镜检查？** | | | | |
| Context Enrichment | 当初始筛查显示HPV阳性伴高危HPV型别，经分型检查发现为HPV16/18阳性时，下一步是否应该进行阴道镜检查？  根据文档中的上下文信息（图1的HPV分型路径）：  - HPV16/18阳性时，应立即转诊阴道镜检查。 - 具体描述："HPV16/18阳性→立即转诊阴道镜检查"。  因此，下一步应该进行阴道镜检查。文档中强调HPV16/18阳性是高危因素，需直接转诊。 | A | A | A |
| Contextual Chunk Headers | 当初始筛查显示HPV阳性伴高危HPV型别，经分型检查发现为HPV16/18阳性时，下一步是否应该进行阴道镜检查？  基于文档片段1（块编号1，主题“HPV阳性及细胞学异常处理流程”）和文档片段3（块编号59，主题“联合筛查异常管理指南”），下一步应该立即进行阴道镜检查。具体依据： - 文档片段1：在HPV分型路径中，“HPV16/18阳性→立即转诊阴道镜检查”。 - 文档片段3：明确指出“HPV分型时HPV16、18阳性，立即转诊阴道镜”，并强调这是标准流程，无需等待细胞学结果。  此处理基于HPV16/18的高致癌风险，文档一致推荐直接转诊阴道镜以早期发现高级别病变。 | A | A | A |
| Context Compression | 当初始筛查显示HPV阳性伴高危HPV型别，经分型检查发现为HPV16/18阳性时，下一步是否应该进行阴道镜检查？  基于文档片段1（相关性: 1.000）、片段2（相关性: 0.900）和片段3（相关性: 0.800），是的，下一步应该进行阴道镜检查。  - 片段1：HPV分型路径中，“HPV16/18阳性→立即转诊阴道镜检查”。 - 片段2：HPV分型检测阳性时，“HPV16/18阳性 → 立即转诊阴道镜”。 - 片段3：HPV分型时HPV16、18阳性，“立即转诊阴道镜”。 - 文档中强调HPV16/18阳性具有较高致癌风险，因此阴道镜检查是立即且必要的步骤，无需等待细胞学结果。 | B | A | A |
| CRAG | HPV16/18阳性时，是否需阴道镜检查？  知识库依据：图1、图3 & 文本2.1   - 必须立即转诊阴道镜检查。   - HPV16/18是最高危型别，共识要求无论细胞学结果如何，均需直接阴道镜评估。 | A | B | A |
| Document Augmentation | 当初始筛查显示HPV阳性伴高危HPV型别，经分型检查发现为HPV16/18阳性时，下一步是否应该进行阴道镜检查？  是的。根据文档片段1、3和5：   - HPV16/18阳性者（无论细胞学结果如何）应立即转诊阴道镜检查（文档片段1和3明确说明）。  - 文档片段5也强调：HPV分型检测中若HPV16/18阳性，直接转诊阴道镜。   所有回答均基于提供的上下文信息，未依赖外部知识。 | A | A | A |
| Fusion RAG | 当初始筛查显示HPV阳性伴高危HPV型别，经分型检查发现为HPV16/18阳性时，下一步是否应该进行阴道镜检查？  根据上下文信息（文档1、文档2和文档6）：  - 是的，下一步应该进行阴道镜检查。  - 文档1 HPV分型路径：HPV16/18阳性→立即转诊阴道镜检查（无需细胞学检查）。  - 文档2：HPV分型时HPV16/18阳性，立即转诊阴道镜。  - 文档6：以高危型HPV作为初筛，若HPV16/18阳性，转诊阴道镜（图1）。  HPV16/18是高危型中的最高风险亚型，直接转诊阴道镜是标准流程，以排除高级别病变或早期癌变。 | A | B | A |
| HyDE | 当初始筛查显示HPV阳性伴高危HPV型别，经分型检查发现为HPV16/18阳性时，下一步是否应该进行阴道镜检查？  回答：  是，下一步应该进行阴道镜检查。  根据文档中的图1描述（HyDE相似度: 0.757）：   - 在HPV分型路径中，HPV16/18阳性→立即转诊阴道镜检查。  - 此规则是强制的，无需等待细胞学结果，因为HPV16/18型别与高风险病变（如CIN III+）相关。   此信息在多个文档片段中一致（如HyDE相似度: 0.585 和 HyDE相似度: 0.577），强调HPV16/18阳性时需立即转诊阴道镜。 | A | A | A |
| Query Transformation | 当初始筛查显示HPV阳性伴高危HPV型别，经分型检查发现为HPV16/18阳性时，下一步是否应该进行阴道镜检查？  是的，应该进行阴道镜检查。依据来自文档片段1（相似度0.698）、文档片段2（相似度0.592）和文档片段4（相似度0.572）：  - 文档片段1：在HPV分型路径中，“HPV16/18阳性→立即转诊阴道镜检查”。 - 文档片段2：明确说明“HPV分型时HPV16、18阳性，立即转诊阴道镜”。 - 文档片段4：在分诊流程中，“HPV16/18阳性 → 立即转诊阴道镜”。  HPV16/18型是高危型中的最高风险亚型，文档强调应立即转诊阴道镜以排除高级别病变或癌症，无需等待细胞学结果。 | A | A | A |
| SelfRAG | 当初始筛查显示HPV阳性伴高危HPV型别，经分型检查发现为HPV16/18阳性时，下一步是否应该进行阴道镜检查？  是的，根据文档中的图1和图3处理流程，当HPV分型检测显示HPV16/18阳性时，下一步应立即转诊阴道镜检查。具体描述如下：  - 图1 HPV分型路径："HPV16/18阳性→立即转诊阴道镜检查"。 - 图3路径："HPV16/18阳性→立即转诊阴道镜"。 - 文档还多次强调此点（例如，在"2.3.3 HPV阳性/细胞学阴性"部分："HPV分型时HPV16、18阳性，立即转诊阴道镜"）。  因此，HPV16/18阳性是阴道镜检查的明确指征。 | A | A | A |
| Semantic Chunking | 当初始筛查显示HPV阳性伴高危HPV型别，经分型检查发现为HPV16/18阳性时，下一步是否应该进行阴道镜检查？  是的，应该进行阴道镜检查。依据来自文档片段1（相似度0.698）、文档片段2（相似度0.592）和文档片段4（相似度0.572）： - 文档片段1：在HPV分型路径中，“HPV16/18阳性→立即转诊阴道镜检查”。 - 文档片段2：明确说明“HPV分型时HPV16、18阳性，立即转诊阴道镜”。 - 文档片段4：在分诊流程中，“HPV16/18阳性 → 立即转诊阴道镜”。  HPV16/18型是高危型中的最高风险亚型，文档强调应立即转诊阴道镜以排除高级别病变或癌症，无需等待细胞学结果。   基于提供的文档内容，我作为妇科专家，将逐一回答您的问题。所有回答均严格基于文档片段中的相关信息。如果某个问题在文档中未提及，我会明确说明"知识库中未找到答案"。以下是针对问题6到10的详细回答： | A | A | A |
| NaiveRAG | 当初始筛查显示HPV阳性伴高危HPV型别，经分型检查发现为HPV16/18阳性时，下一步是否应该进行阴道镜检查？  是的，下一步应该立即转诊阴道镜检查。文档强调，HPV16/18阳性被视为最高风险型别，无论细胞学结果如何（即使细胞学阴性），均需直接转诊阴道镜，以排除高级别病变或早期癌变。   此处理基于HPV16/18的高致癌性：文档指出，这些型别与快速进展为CINⅢ+相关，因此不依赖细胞学结果，直接进行阴道镜评估。   关键依据：   - "HPV16/18阳性→立即转诊阴道镜检查"（相似度0.668）。  - "HPV分型时HPV16、18阳性，立即转诊阴道镜"（相似度0.524）。  - "细胞学 ≥ ASC-US & HPV（+）...若HPV分型检测阳性：HPV16/18阳性 → 立即转诊阴道镜"（相似度0.507），但文档明确HPV16/18阳性时，即使细胞学阴性也需阴道镜。 | A | A | A |
| Rerank | 当初始筛查显示HPV阳性伴高危HPV型别，经分型检查发现为HPV16/18阳性时，下一步是否应该进行阴道镜检查？  是，下一步应该进行阴道镜检查。   依据：   - 文档片段2（相关性: 0.9771）："HPV分型路径：HPV16/18阳性→立即转诊阴道镜检查"。  - 文档片段1（相关性: 0.9878）："当HPV分型检测，若HPV16/18阳性，转诊阴道镜"。  - 文档片段3（相关性: 0.9723）也提到："HPV16/18阳性 → 立即转诊阴道镜"。   HPV16/18型是高危型中的最高风险亚型，直接转诊阴道镜是标准管理，以早期识别和治疗潜在癌前病变。 | A | A | A |
| RSE | 当初始筛查显示HPV阳性伴高危HPV型别，经分型检查发现为HPV16/18阳性时，下一步是否应该进行阴道镜检查？  根据相关片段1（来自原始块0-1）的图1描述，在HPV分型路径中： - “HPV16/18阳性→立即转诊阴道镜检查”。 相关片段2（来自原始块58-60）的图3部分也提到：对于HPV分型检测阳性，“HPV16/18阳性 → 立即转诊阴道镜”。 | B | A | A |
| Non-RAG strategy | 当初始筛查显示HPV阳性伴高危HPV型别，经分型检查发现为HPV16/18阳性时，下一步是否应该进行阴道镜检查  是的，无论细胞学结果如何（即使细胞学阴性），HPV16/18阳性均应立即转诊阴道镜检查，因为HPV16/18感染与宫颈癌风险高度相关（风险>10%）。 | A | B | A |
| **Question 6: 当初始筛查显示HPV阳性伴高危HPV型别，经分型检查显示既非HPV16/18阳性但属于其他十二种型别之一时，最可能的后续检查是什么？** | | | | |
| Context Enrichment | 当初始筛查显示HPV阳性伴高危HPV型别，经分型检查显示既非HPV16/18阳性但属于其他十二种型别之一时，最可能的后续检查是什么？  根据文档中的图1（高危型HPV阳性处理流程），当HPV分型检测显示HPV16/18阴性但其他12型高危HPV阳性时，后续应进行宫颈细胞学检查。文档明确指出：“HPV分型路径：HPV16/18阴性或其他12型阳性→进行宫颈细胞学检查”。因此，最可能的后续检查是宫颈细胞学检查。 | A | A | A |
| Contextual Chunk Headers | 当初始筛查显示HPV阳性伴高危HPV型别，经分型检查显示既非HPV16/18阳性但属于其他十二种型别之一时，最可能的后续检查是什么？  答案： 应进行宫颈细胞学检查。  - 依据：   根据文档片段1（块主题：HPV阳性及细胞学异常处理流程）中的描述：   > "HPV分型路径：HPV16/18阳性→立即转诊阴道镜检查；HPV16/18阴性或其他12型阳性→进行宫颈细胞学检查。"   因此，当分型显示非HPV16/18阳性但属于其他12种高危型别时，后续需进入细胞学检查路径。 | A | A | A |
| Context Compression | 当初始筛查显示HPV阳性伴高危HPV型别，经分型检查显示既非HPV16/18阳性但属于其他十二种型别之一时，最可能的后续检查是什么？  回答：  根据文档片段1（相关性: 1.000），当高危型HPV检测结果为阳性，且分型检查显示既非HPV16/18阳性但属于其他12种高危型别之一时，最可能的后续检查是进行宫颈细胞学检查。具体流程如下：   - 如果HPV分型结果为其他12型阳性（即HPV16/18阴性），患者应进入细胞学检查路径。  - 细胞学检查结果若≥ASC-US（包括ASC-US、LSIL、HSIL等异常），则转诊阴道镜检查；若细胞学检查结果为阴性，则建议1年后重复细胞学+HPV联合检查。   （  此信息在文档片段2（相关性: 0.900）中也得到支持："HPV16/18阴性但其他12型高危HPV阳性 → 1年复查"，这里的"1年复查"指细胞学检查或联合检查，但初始后续检查明确为细胞学检查。 | A | A | A |
| CRAG | 当初始筛查显示HPV阳性伴高危HPV型别，经分型检查显示既非HPV16/18阳性但属于其他十二种型别之一时，最可能的后续检查是什么？  答案：   - 需进行宫颈细胞学检查。   依据：   - 图1流程明确说明：若HPV分型结果为"HPV16/18阴性但其他12型高危HPV阳性"，下一步应进行宫颈细胞学检查（图1，第三级分流路径）。   - 文本补充："HPV16/18阴性或其他12型阳性→进行宫颈细胞学检查"（上下文文本）。 | A | A | A |
| Document Augmentation | 当初始筛查显示HPV阳性伴高危HPV型别，经分型检查显示既非HPV16/18阳性但属于其他十二种型别之一时，最可能的后续检查是什么？  根据文档片段1和片段5，如果高危型HPV检测结果为阳性，且分型检查显示HPV16/18阴性但其他12型阳性，则需要进行宫颈细胞学检查（如TCT或液基细胞学）。如果细胞学检查结果阴性，建议1年后重复联合检查（细胞学+HPV）；如果细胞学检查结果≥ASC-US（异常），则转诊阴道镜检查。因此，最可能的后续检查是宫颈细胞学检查。 | A | B | A |
| Fusion RAG | 当初始筛查显示HPV阳性伴高危HPV型别，经分型检查显示既非HPV16/18阳性但属于其他十二种型别之一时，最可能的后续检查是什么？  根据上下文信息（相关文档1）： - 对于高危型HPV阳性患者，如果HPV分型检测结果为“HPV16/18阴性或其他12型阳性”，则后续应进行宫颈细胞学检查。 - 具体流程：在HPV分型路径中，HPV16/18阴性或其他12型阳性时，患者需进入细胞学检查路径（细胞学检查路径适用于所有需细胞学分流的患者）。 - 文档中未提及其他后续检查选项（如直接阴道镜），因此最可能的后续检查是宫颈细胞学检查。  回答： 最可能的后续检查是宫颈细胞学检查。 | A | A | A |
| HyDE | 当初始筛查显示HPV阳性伴高危HPV型别，经分型检查显示既非HPV16/18阳性但属于其他十二种型别之一时，最可能的后续检查是什么？  回答： 根据文档内容，当高危型HPV检测结果为阳性，且分型检查显示既非HPV16/18阳性但属于其他12种高危型别之一时，最可能的后续检查是进行宫颈细胞学检查。文档明确指出（例如在第一个文档片段中）："HPV分型路径：HPV16/18阴性或其他12型阳性→进行宫颈细胞学检查"。这适用于分型检测后的分流路径，目的是通过细胞学检查进一步评估风险。 | B | A | A |
| Query Transformation | 当初始筛查显示HPV阳性伴高危HPV型别，经分型检查显示既非HPV16/18阳性但属于其他十二种型别之一时，最可能的后续检查是什么？  根据文档片段1（相似度0.698），在HPV分型路径中，如果HPV分型检测显示HPV16/18阴性但其他12型阳性（即属于高危HPV型别中的其他十二种之一），则后续应进行宫颈细胞学检查。文档片段2（相似度0.647）和文档片段3（相似度0.617）也支持这一流程，强调当HPV16/18阴性时，需通过细胞学检查进行分流。因此，最可能的后续检查是宫颈细胞学检查。 | A | A | A |
| SelfRAG | 当初始筛查显示HPV阳性伴高危HPV型别，经分型检查显示既非HPV16/18阳性但属于其他十二种型别之一时，最可能的后续检查是什么？  根据文档中的图1处理流程（高危型HPV阳性处理）：如果HPV分型检测显示HPV16/18阴性但其他12型高危HPV阳性，则后续应进行宫颈细胞学检查。具体路径为："HPV16/18阴性或其他12型阳性→进行宫颈细胞学检查"。因此，最可能的后续检查是宫颈细胞学检查。 | A | A | A |
| Semantic Chunking | 当初始筛查显示HPV阳性伴高危HPV型别，经分型检查显示既非HPV16/18阳性但属于其他十二种型别之一时，最可能的后续检查是什么？  根据文档片段1（相似度0.698），在HPV分型路径中，如果HPV分型检测显示HPV16/18阴性但其他12型阳性（即属于高危HPV型别中的其他十二种之一），则后续应进行宫颈细胞学检查。文档片段2（相似度0.647）和文档片段3（相似度0.617）也支持这一流程，强调当HPV16/18阴性时，需通过细胞学检查进行分流。因此，最可能的后续检查是宫颈细胞学检查。 | A | A | A |
| NaiveRAG | 当初始筛查显示HPV阳性伴高危HPV型别，经分型检查显示既非HPV16/18阳性但属于其他十二种型别之一时，最可能的后续检查是什么？  回答： 根据文档内容，当HPV分型检查显示为HPV16/18阴性但属于其他12种高危型别阳性时，最可能的后续检查是进行宫颈细胞学检查。文档明确指出："HPV分型路径：HPV16/18阴性或其他12型阳性→进行宫颈细胞学检查"（来自第一个文档片段）。此外，在第三个文档片段中也提到："HPV16/18阴性但其他12型高危HPV阳性 → 进行宫颈细胞学检查"。因此，后续检查是宫颈细胞学检查，以进一步评估细胞异常情况。 | A | A | A |
| Rerank | 当初始筛查显示HPV阳性伴高危HPV型别，经分型检查显示既非HPV16/18阳性但属于其他十二种型别之一时，最可能的后续检查是什么？  根据上下文信息，当高危型HPV检测结果为阳性，且经分型检查显示HPV16/18阴性但属于其他12种高危型别之一时，最可能的后续检查是宫颈细胞学检查。   - 依据：文档片段1（相关性: 0.9655）中的HPV分型路径明确指出："HPV16/18阴性或其他12型阳性→进行宫颈细胞学检查"。这表示分型后非HPV16/18阳性的其他12型高危HPV阳性患者，应直接进入细胞学检查路径，以进一步评估异常情况。 | A | A | A |
| RSE | 当初始筛查显示HPV阳性伴高危HPV型别，经分型检查显示既非HPV16/18阳性但属于其他十二种型别之一时，最可能的后续检查是什么？  基于上下文信息（相关片段1中的图1）：   - 对于高危型HPV阳性患者，如果分型检测显示HPV16/18阴性但其他12型阳性，应进行宫颈细胞学检查。  - 具体流程：在HPV分型路径中，HPV16/18阴性或其他12型阳性→进行宫颈细胞学检查。  - 因此，最可能的后续检查是宫颈细胞学检查。 | A | A | A |
| Non-RAG strategy | 当初始筛查显示HPV阳性伴高危HPV型别，经分型检查显示既非HPV16/18阳性但属于其他十二种型别之一时，最可能的后续检查是什么？  当HPV阳性非16/18型（即其他12种高危HPV型别之一）时，最可能的后续检查是进行细胞学检查（如果初始筛查未包括细胞学）。如果细胞学阴性，建议1年后重复联合检测（HPV和细胞学）；如果细胞学异常（如ASC-US或更差），则推荐阴道镜检查。 | A | A | A |
| **Question 7: 当细胞学检查显示ASC-US作为异常初始筛查结果时，下一步检查是什么？** | | | | |
| Context Enrichment | 当细胞学检查显示ASC-US作为异常初始筛查结果时，下一步检查是什么？  根据文档中的图二（宫颈细胞学异常处理流程），对于ASC-US患者，下一步应进行HPV检测以分流。文档描述：“ASC-US患者：首先应进行HPV检测”。因此，下一步检查是HPV检测。 | A | B | A |
| Contextual Chunk Headers | 当细胞学检查显示ASC-US作为异常初始筛查结果时，下一步检查是什么？  答案： 下一步应进行高危型HPV检测。  - 依据：   文档片段1（块主题：HPV阳性及细胞学异常处理流程）和图2流程明确规定：   > "ASC-US患者：首先应进行HPV检测：若HPV阳性（+）→转诊阴道镜检查；若HPV阴性（-）→1年后复查细胞学检查。"   此外，文档片段2（块主题：细胞学异常处理指南）也强调：   > "对ASC-US使用HPV进行分流。" | A | A | A |
| Context Compression | 当细胞学检查显示ASC-US作为异常初始筛查结果时，下一步检查是什么？  回答：  根据文档片段1（相关性: 1.000）和文档片段3（相关性: 0.800），当细胞学检查显示ASC-US（意义不明的非典型鳞状细胞）作为异常初始筛查结果时，下一步检查是进行HPV检测以进行分流。具体流程如下：   - ASC-US患者首先应进行HPV检测。  - HPV检测结果将决定后续处理：如果HPV阳性，则转诊阴道镜检查；如果HPV阴性，则建议1年后复查细胞学检查。   （  文档片段2（相关性: 0.900）也确认此步骤："细胞学（ASC-US）& HPV（-）则应进行1年复查"，但前提是完成HPV检测。 | A | A | A |
| CRAG | 当细胞学检查显示ASC-US作为异常初始筛查结果时，下一步检查是什么？  答案：   - 首选HPV检测进行分流。   依据：   - 图2流程规定：ASC-US患者应首先进行HPV检测（图2，ASC-US处理路径）。   - 文本明确："ASC-US患者：首先应进行HPV检测"（上下文文本）。 | A | A | A |
| Document Augmentation | 当细胞学检查显示ASC-US作为异常初始筛查结果时，下一步检查是什么？  根据文档片段2和片段3，当细胞学检查显示ASC-US（意义不明的非典型鳞状细胞）时，下一步应进行HPV检测以进行分流。如果HPV阳性，则转诊阴道镜检查；如果HPV阴性，则建议1年后复查细胞学检查。如果无法进行HPV检测，则直接转诊阴道镜检查。 | A | B | A |
| Fusion RAG | 当细胞学检查显示ASC-US作为异常初始筛查结果时，下一步检查是什么？  根据上下文信息（相关文档1和图2）： - 对于ASC-US（意义不明的非典型鳞状细胞）患者，处理流程的第一步是进行HPV检测。 - 具体描述：ASC-US患者“首先应进行HPV检测”，以HPV结果作为分流依据（如果HPV阳性则转诊阴道镜，如果HPV阴性则1年后复查）。 - 文档中未提到其他初始步骤（如直接阴道镜），因此下一步检查是HPV检测。  回答： 下一步检查是进行HPV检测。 | B | A | A |
| HyDE | 当细胞学检查显示ASC-US作为异常初始筛查结果时，下一步检查是什么？  回答： 根据文档内容，当细胞学检查显示ASC-US（意义不明的非典型鳞状细胞）作为异常初始筛查结果时，下一步检查是进行HPV检测以分流。文档明确说明（例如在第一个文档片段中）："ASC-US患者：首先应进行HPV检测"。HPV检测用于区分高风险患者：如果HPV阳性，则转诊阴道镜检查；如果HPV阴性，则建议后续复查。 | A | A | A |
| Query Transformation | 当细胞学检查显示ASC-US作为异常初始筛查结果时，下一步检查是什么？  根据文档片段1（相似度0.698）中的图二描述，ASC-US患者首先应进行HPV检测以进行分流。文档片段2（相似度0.647）和文档片段6（相似度0.567）进一步确认，ASC-US作为异常结果时，下一步是使用HPV检测作为分流工具。因此，下一步检查是HPV检测。 | A | A | A |
| SelfRAG | 当细胞学检查显示ASC-US作为异常初始筛查结果时，下一步检查是什么？  根据文档中的图2处理流程（宫颈细胞学异常处理）：对于ASC-US患者，下一步应首先进行HPV检测。具体描述为："ASC-US患者：首先应进行HPV检测"。如果无法进行HPV检测，则直接转诊阴道镜检查。因此，下一步检查通常是HPV检测。 | B | A | A |
| Semantic Chunking | 当细胞学检查显示ASC-US作为异常初始筛查结果时，下一步检查是什么？  根据文档片段1（相似度0.698）中的图二描述，ASC-US患者首先应进行HPV检测以进行分流。文档片段2（相似度0.647）和文档片段6（相似度0.567）进一步确认，ASC-US作为异常结果时，下一步是使用HPV检测作为分流工具。因此，下一步检查是HPV检测。 | A | A | A |
| NaiveRAG | 当细胞学检查显示ASC-US作为异常初始筛查结果时，下一步检查是什么？  回答： 根据文档内容，当细胞学检查显示ASC-US（意义不明的非典型鳞状细胞）作为异常初始筛查结果时，下一步检查是进行HPV检测以进行分流。文档明确指出："ASC-US患者：首先应进行HPV检测"（来自第二个文档片段）。在第四个文档片段中也强调："ASC-US患者应首先进行HPV检测"。因此，下一步是HPV检测，以确定是否需要转诊阴道镜或后续复查。 | A | A | A |
| Rerank | 当细胞学检查显示ASC-US作为异常初始筛查结果时，下一步检查是什么？  当细胞学检查显示ASC-US（意义不明的非典型鳞状细胞）作为异常初始筛查结果时，下一步检查是进行HPV检测。   - 依据：文档片段1（相关性: 0.9655）中的图二处理流程描述："ASC-US患者：首先应进行HPV检测"。这强调了HPV检测作为ASC-US结果的分流步骤，用于决定后续管理（如转诊阴道镜或复查）。 | A | A | A |
| RSE | 当细胞学检查显示ASC-US作为异常初始筛查结果时，下一步检查是什么？  基于上下文信息（相关片段1中的图2和相关片段2中的2.2.2）：   - 对于宫颈细胞学检查异常（包括ASC-US），ASC-US患者首先应进行HPV检测以分流。  - 具体流程：ASC-US患者→首先进行HPV检测（如果无法进行HPV检测，则直接转诊阴道镜检查）。  - 因此，下一步检查是进行HPV检测。 | A | A | A |
| Non-RAG strategy | 当细胞学检查显示ASC-US作为异常初始筛查结果时，下一步检查是什么？  当细胞学显示ASC-US时，下一步检查是进行HPV检测以分流管理。HPV检测结果将决定后续步骤：如果HPV阳性，推荐阴道镜检查；如果HPV阴性，则建议随访。 | A | A | A |
| **Question 8: 当细胞学检查显示ASC-US作为异常初始筛查结果并使用HPV进行分流时，如果HPV阳性，是否应该进行阴道镜检查？** | | | | |
| Context Enrichment | 当细胞学检查显示ASC-US作为异常初始筛查结果并使用HPV进行分流时，如果HPV阳性，是否应该进行阴道镜检查？  根据文档中的图二（宫颈细胞学异常处理流程），当ASC-US患者HPV检测结果为阳性时，应直接转诊阴道镜检查。文档明确说明：“若HPV阳性（+）→转诊阴道镜检查”。因此，是的，应该进行阴道镜检查。 | A | A | A |
| Contextual Chunk Headers | 当细胞学检查显示ASC-US作为异常初始筛查结果并使用HPV进行分流时，如果HPV阳性，是否应该进行阴道镜检查？  答案： 是，应立即转诊阴道镜检查。  - 依据：   文档片段1（块主题：HPV阳性及细胞学异常处理流程）明确说明：   > "ASC-US患者：若HPV阳性（+）→转诊阴道镜检查。"   文档片段2（块主题：细胞学异常处理指南）进一步支持：   > "如果HPV阳性（不分型）或HPV分型检测HPV16、18阳性，均应转诊阴道镜检查。" | A | A | A |
| Context Compression | 当细胞学检查显示ASC-US作为异常初始筛查结果并使用HPV进行分流时，如果HPV阳性，是否应该进行阴道镜检查？  回答：  是的，应该进行阴道镜检查。  根据文档片段1（相关性: 1.000）、文档片段3（相关性: 0.800）和文档片段6（相关性: 0.700），当细胞学检查显示ASC-US并使用HPV进行分流时，如果HPV检测结果为阳性（无论是否分型），均应转诊阴道镜检查。具体依据如下：   - 文档片段1明确说明："若HPV阳性（+）→转诊阴道镜检查"。  - 文档片段3强调："如果 HPV 阳性(不分型) 或 HPV 分型检测 HPV16、18 阳性，均应转诊阴道镜检查"。  - 文档片段6进一步支持："HPV 阳性 /ASC-US 其 5 年 CIN Ⅲ+ 的累积风险为 6.8%，高于 LSIL 风险，依据同等风险同等管理，支持直接转诊阴道镜"。   因此，HPV阳性是转诊阴道镜的明确指征。 | A | A | A |
| CRAG | 当细胞学检查显示ASC-US作为异常初始筛查结果并使用HPV进行分流时，如果HPV阳性，是否应该进行阴道镜检查？  答案：   - 是，需立即转诊阴道镜检查。   依据：   - 图2流程：若ASC-US患者HPV检测阳性（无论是否分型），均需转诊阴道镜（图2，ASC-US路径）。   - 文本强调："若HPV阳性（+）→转诊阴道镜检查"（上下文文本）。 | A | A | A |
| Document Augmentation | 当细胞学检查显示ASC-US作为异常初始筛查结果并使用HPV进行分流时，如果HPV阳性，是否应该进行阴道镜检查？  是的。根据文档片段2、片段3和片段4，当细胞学检查为ASC-US且HPV检测阳性时，应立即转诊阴道镜检查。文档片段4特别指出：“HPV阳性/ASC-US其5年CINⅢ+的累积风险为6.8%，高于LSIL风险，依据同等风险同等管理，支持直接转诊阴道镜。” | A | A | A |
| Fusion RAG | 当细胞学检查显示ASC-US作为异常初始筛查结果并使用HPV进行分流时，如果HPV阳性，是否应该进行阴道镜检查？  根据上下文信息（相关文档1、相关文档2和相关文档3）： - 在ASC-US患者中，如果HPV检测结果为阳性（无论是否分型），则应立即转诊阴道镜检查。 - 具体描述：相关文档1指出“若HPV阳性（+）→转诊阴道镜检查”；相关文档2强调“如果HPV阳性（不分型）或HPV分型检测HPV16、18阳性，均应转诊阴道镜检查”；相关文档3也支持“HPV阳性/ASC-US支持直接转诊阴道镜”。 - 文档中明确指示HPV阳性时需进行阴道镜，因此答案是肯定的。  回答： 是的，应该进行阴道镜检查。 | A | A | A |
| HyDE | 当细胞学检查显示ASC-US作为异常初始筛查结果并使用HPV进行分流时，如果HPV阳性，是否应该进行阴道镜检查？  回答： 是的，应该进行阴道镜检查。文档内容一致表明，当ASC-US患者HPV检测结果为阳性时，无论HPV是否分型，均需转诊阴道镜检查。例如：   - 第一个文档片段："若HPV阳性（+）→转诊阴道镜检查"。   - 第二个文档片段："HPV 阳性 /ASC-US ... 支持直接转诊阴道镜"。   这基于ASC-US合并HPV阳性的CINⅢ+风险较高（5年累积风险为6.8%），因此阴道镜检查是必要的。 | A | C | A |
| Query Transformation | 当细胞学检查显示ASC-US作为异常初始筛查结果并使用HPV进行分流时，如果HPV阳性，是否应该进行阴道镜检查？  是的，应该进行阴道镜检查。文档片段1（相似度0.698）明确指出，ASC-US患者如果HPV检测阳性（无论是否分型），应直接转诊阴道镜检查。文档片段3（相似度0.617）也支持这一结论，指出HPV阳性/ASC-US的组合支持直接转诊阴道镜。文档片段2（相似度0.647）同样强调，HPV阳性（不分型或HPV16/18阳性）时均应转诊阴道镜。 | A | B | A |
| SelfRAG | 当细胞学检查显示ASC-US作为异常初始筛查结果并使用HPV进行分流时，如果HPV阳性，是否应该进行阴道镜检查？  根据文档中的图2处理流程：对于ASC-US患者，如果HPV检测结果为阳性（HPV阳性），则应转诊阴道镜检查。具体路径为："若HPV阳性（+）→转诊阴道镜检查"。因此，是的，应该进行阴道镜检查。 | A | A | A |
| Semantic Chunking | 当细胞学检查显示ASC-US作为异常初始筛查结果并使用HPV进行分流时，如果HPV阳性，是否应该进行阴道镜检查？  是的，应该进行阴道镜检查。文档片段1（相似度0.698）明确指出，ASC-US患者如果HPV检测阳性（无论是否分型），应直接转诊阴道镜检查。文档片段3（相似度0.617）也支持这一结论，指出HPV阳性/ASC-US的组合支持直接转诊阴道镜。文档片段2（相似度0.647）同样强调，HPV阳性（不分型或HPV16/18阳性）时均应转诊阴道镜。 | A | A | A |
| NaiveRAG | 当细胞学检查显示ASC-US作为异常初始筛查结果并使用HPV进行分流时，如果HPV阳性，是否应该进行阴道镜检查？  回答： 是的，应该进行阴道镜检查。文档明确指出，当ASC-US患者进行HPV分流检测结果为阳性时，应直接转诊阴道镜检查。例如，第二个文档片段提到："ASC-US患者：首先应进行HPV检测：若HPV阳性（+）→转诊阴道镜检查"。第四个文档片段也支持这一观点："HPV阳性/ASC-US其5年CINⅢ+的累积风险为6.8%，高于LSIL风险，依据同等风险同等管理，支持直接转诊阴道镜"。因此，HPV阳性时，阴道镜检查是必要的。 | A | A | A |
| Rerank | 当细胞学检查显示ASC-US作为异常初始筛查结果并使用HPV进行分流时，如果HPV阳性，是否应该进行阴道镜检查？  是的，如果HPV检测结果为阳性，应该进行阴道镜检查。   - 依据：   - 文档片段1（相关性: 0.9655）明确说明："ASC-US患者：若HPV阳性（+）→转诊阴道镜检查"。   - 文档片段2（相关性: 0.9545）进一步支持："HPV阳性/ASC-US，其5年CINⅢ+的累积风险为6.8%，高于LSIL风险，依据同等风险同等管理，支持直接转诊阴道镜"。   - 文档片段3（相关性: 0.9420）也确认："对ASC-US使用HPV进行分流，如果HPV阳性（不分型）或HPV分型检测HPV16、18阳性，均应转诊阴道镜检查"。   因此，HPV阳性时，阴道镜检查是标准处理。 | A | A | A |
| RSE | 当细胞学检查显示ASC-US作为异常初始筛查结果并使用HPV进行分流时，如果HPV阳性，是否应该进行阴道镜检查？  基于上下文信息（相关片段1中的图2和相关片段2中的2.2.2）：   - 对于ASC-US患者使用HPV分流时，如果HPV阳性（无论是否分型），均应转诊阴道镜检查。  - 具体流程：若HPV阳性（+）→转诊阴道镜检查。  - 因此，是，应该进行阴道镜检查。 | A | A | A |
| Non-RAG strategy | 当细胞学检查显示ASC-US作为异常初始筛查结果并使用HPV进行分流时，如果HPV阳性，是否应该进行阴道镜检查？  是，当ASC-US且HPV阳性时，应该立即进行阴道镜检查。这基于高风险判定，旨在及时识别和治疗癌前病变。 | A | A | A |
| **Question 9: 当细胞学检查显示ASC-US作为异常初始筛查结果并使用HPV进行分流时，如果HPV阴性，后续检查应该是什么？** | | | | |
| Context Enrichment | 当细胞学检查显示ASC-US作为异常初始筛查结果并使用HPV进行分流时，如果HPV阴性，后续检查应该是什么？  根据文档中的图二（宫颈细胞学异常处理流程），当ASC-US患者HPV检测结果为阴性时，后续应进行1年后复查（重复细胞学检查）。文档描述：“若HPV阴性（-）→1年后应复查（重复细胞学检查）”。因此，后续检查是1年后重复细胞学检查。 | A | A | A |
| Contextual Chunk Headers | 当细胞学检查显示ASC-US作为异常初始筛查结果并使用HPV进行分流时，如果HPV阴性，后续检查应该是什么？  答案： 应在1年后重复细胞学检查。  - 依据：   文档片段1（块主题：HPV阳性及细胞学异常处理流程）详细描述：   > "ASC-US患者：若HPV阴性（-）→1年后应复查（重复细胞学检查），若复查结果为阴性则后续进行常规筛查即可，若结果大于等于ASC，则应进行阴道镜检查。"   文档片段3（块主题：联合筛查异常管理指南）也提到类似流程：   > "细胞学（ASC-US）&HPV（-）→1年复查。" | A | A | A |
| Context Compression | 当细胞学检查显示ASC-US作为异常初始筛查结果并使用HPV进行分流时，如果HPV阴性，后续检查应该是什么？  回答：  根据文档片段1（相关性: 1.000）和文档片段2（相关性: 0.900），当细胞学检查显示ASC-US并使用HPV进行分流时，如果HPV检测结果为阴性，后续检查是1年后重复细胞学和HPV联合检查。具体流程如下：   - HPV阴性患者，建议1年后复查（重复细胞学检查）。  - 如果复查结果为阴性，则后续进行常规筛查；如果复查结果≥ASC-US，则应转诊阴道镜检查。 | A | A | A |
| CRAG | 当细胞学检查显示ASC-US作为异常初始筛查结果并使用HPV进行分流时，如果HPV阴性，后续检查应该是什么？  答案：   - 1年后重复细胞学检查。   依据：   - 图2流程：若HPV阴性（-），则1年后复查细胞学（图2，ASC-US路径）。   - 文本说明："若HPV阴性（-）→1年后应复查（重复细胞学检查）"（上下文文本）。 | A | A | A |
| Document Augmentation | 当细胞学检查显示ASC-US作为异常初始筛查结果并使用HPV进行分流时，如果HPV阴性，后续检查应该是什么？  根据文档片段2和片段3，如果细胞学检查为ASC-US且HPV检测阴性，则建议1年后重复细胞学检查。如果复查结果为阴性，后续进行常规筛查即可；如果复查结果≥ASC（异常），则应进行阴道镜检查。 | B | A | A |
| Fusion RAG | 当细胞学检查显示ASC-US作为异常初始筛查结果并使用HPV进行分流时，如果HPV阴性，后续检查应该是什么？  根据上下文信息（相关文档1和相关文档3）： - 在ASC-US患者中，如果HPV检测结果为阴性，则后续应进行1年后的复查（重复细胞学检查）。 - 具体描述：相关文档1指出“若HPV阴性（-）→1年后应复查（重复细胞学检查）”；相关文档3在细胞学联合高危型HPV检测部分也提到“细胞学（ASC-US）&HPV（-）则应进行1年复查”。 - 文档中未提及其他后续检查（如立即阴道镜），因此后续检查是1年后重复细胞学检查。  回答： 后续检查是1年后重复细胞学检查。 | A | A | A |
| HyDE | 当细胞学检查显示ASC-US作为异常初始筛查结果并使用HPV进行分流时，如果HPV阴性，后续检查应该是什么？  回答： 根据文档内容，当ASC-US患者HPV检测结果为阴性时，后续检查是1年后重复细胞学检查。文档明确说明（例如在第一个文档片段中）："若HPV阴性（-）→1年后应复查（重复细胞学检查）"。复查后，如果结果阴性，则转为常规筛查；如果结果≥ASC-US，则需转诊阴道镜检查。 | A | A | A |
| Query Transformation | 当细胞学检查显示ASC-US作为异常初始筛查结果并使用HPV进行分流时，如果HPV阴性，后续检查应该是什么？  如果HPV检测阴性，后续应在1年后重复细胞学检查。文档片段1（相似度0.698）中的图二描述，ASC-US患者若HPV阴性，则1年后应复查（重复细胞学检查）。文档片段4（相似度0.599）也明确说明，细胞学(ASC-US) & HPV(-) 时应进行1年复查。因此，后续检查是1年后重复细胞学检查。 | A | A | A |
| SelfRAG | 当细胞学检查显示ASC-US作为异常初始筛查结果并使用HPV进行分流时，如果HPV阴性，后续检查应该是什么？  根据文档中的图2处理流程：对于ASC-US患者，如果HPV检测结果为阴性（HPV阴性），则后续应在1年后进行复查，具体为重复细胞学检查。描述为："若HPV阴性（-）→1年后应复查（重复细胞学检查）"。因此，后续检查是1年后重复细胞学检查。 | A | A | A |
| Semantic Chunking | 当细胞学检查显示ASC-US作为异常初始筛查结果并使用HPV进行分流时，如果HPV阴性，后续检查应该是什么？  如果HPV检测阴性，后续应在1年后重复细胞学检查。文档片段1（相似度0.698）中的图二描述，ASC-US患者若HPV阴性，则1年后应复查（重复细胞学检查）。文档片段4（相似度0.599）也明确说明，细胞学(ASC-US) & HPV(-) 时应进行1年复查。因此，后续检查是1年后重复细胞学检查。 | A | A | A |
| NaiveRAG | 当细胞学检查显示ASC-US作为异常初始筛查结果并使用HPV进行分流时，如果HPV阴性，后续检查应该是什么？  回答： 根据文档内容，当ASC-US患者进行HPV分流检测结果为阴性时，后续检查是1年后重复细胞学检查。文档明确指出："ASC-US患者：首先应进行HPV检测：若HPV阴性（-）→1年后应复查（重复细胞学检查）"（来自第二个文档片段）。在复查中，如果结果为阴性，则转为常规筛查；如果结果≥ASC-US，则需进行阴道镜检查。因此，后续检查是1年后的细胞学复查。 | A | A | A |
| Rerank | 当细胞学检查显示ASC-US作为异常初始筛查结果并使用HPV进行分流时，如果HPV阴性，后续检查应该是什么？  如果HPV检测结果为阴性，后续检查应该是1年后复查细胞学检查。   - 依据：文档片段1（相关性: 0.9655）中的图二流程描述："ASC-US患者：若HPV阴性（-）→1年后应复查（重复细胞学检查）"。这表示HPV阴性时，无需立即干预，但需在1年后重复细胞学检查以监测变化。 | A | A | A |
| RSE | 当细胞学检查显示ASC-US作为异常初始筛查结果并使用HPV进行分流时，如果HPV阴性，后续检查应该是什么？  基于上下文信息（相关片段1中的图2）：   - 对于ASC-US患者使用HPV分流时，如果HPV阴性（-），应进行1年后复查（重复细胞学检查）。  - 具体流程：若HPV阴性（-）→1年后应复查（重复细胞学检查）。  - 因此，后续检查是1年后重复细胞学检查。 | A | A | A |
| Non-RAG strategy | 当细胞学检查显示ASC-US作为异常初始筛查结果并使用HPV进行分流时，如果HPV阴性，后续检查应该是什么？  当细胞学ASC-US使用HPV分流且HPV阴性时，后续检查应在12个月后复查高危型HPV检测和细胞学检查（如联合筛查）。这反映了低风险状态，无需立即阴道镜检查 | A | A | A |
| **Question 10: 当细胞学检查结果显示ASC-H（高度鳞状上皮内病变不能除外的鳞状细胞）、LSIL（低度鳞状上皮内病变）或HSIL（高度鳞状上皮内病变）时，是否需要进行阴道镜检查？** | | | | |
| Context Enrichment | 当细胞学检查结果显示ASC-H（高度鳞状上皮内病变不能除外的鳞状细胞）、LSIL（低度鳞状上皮内病变）或HSIL（高度鳞状上皮内病变）时，是否需要进行阴道镜检查？  根据文档中的图二（宫颈细胞学异常处理流程），对于ASC-H、LSIL、HSIL等异常类型患者，应直接转诊阴道镜检查。文档明确指出：“其他异常类型患者（ASC-H, LSIL, HSIL, AGC）→直接转诊阴道镜检查”。因此，是的，需要进行阴道镜检查。 | A | A | A |
| Contextual Chunk Headers | 当细胞学检查结果显示ASC-H（高度鳞状上皮内病变不能除外的鳞状细胞）、LSIL（低度鳞状上皮内病变）或HSIL（高度鳞状上皮内病变）时，是否需要进行阴道镜检查？  答案： 是，必须直接转诊阴道镜检查。  - 依据：   文档片段1（块主题：HPV阳性及细胞学异常处理流程）中图2流程规定：   > "其他异常类型患者（ASC-H, LSIL, HSIL, AGC以及ASC-US患者，一年复查后）：直接转诊阴道镜检查。"   文档片段2（块主题：细胞学异常处理指南）进一步强调：   > "对于细胞学异常的ASC-H、LSIL、HSIL、AGC均应转诊阴道镜。"   文档片段5（块主题：宫颈癌筛查异常管理流程）也确认：   > "以细胞学作为初筛异常结果的处理中，ASC-H、LSIL、HSIL需转诊阴道镜。" | A | A | A |
| Context Compression | 当细胞学检查结果显示ASC-H（高度鳞状上皮内病变不能除外的鳞状细胞）、LSIL（低度鳞状上皮内病变）或HSIL（高度鳞状上皮内病变）时，是否需要进行阴道镜检查？  回答：  是的，需要进行阴道镜检查。  根据文档片段1（相关性: 1.000）和文档片段3（相关性: 0.800），当细胞学检查结果显示ASC-H、LSIL或HSIL等异常类型时，应直接转诊阴道镜检查。具体依据如下：   - 文档片段1明确列出："其他异常类型患者（ASC-H,LSIL,HSIL,AGC以及ASC-US患者，一年复查后）：直接转诊阴道镜检查"。这里，ASC-H、LSIL和HSIL属于"其他异常类型"，因此直接转诊，无需先进行HPV分流或其他检查。  - 文档片段3进一步确认："对于细胞学异常的 ASC-H、LSIL、HSIL、AGC 均应转诊阴道镜"。   文档片段7（相关性: 0.700）提到LSIL建议12月重复联合检查，但这是在特定管理路径下（可能针对低风险情况），而文档片段1和3的优先级更高，明确指出这些异常类型需直接转诊阴道镜。因此，基于上下文，ASC-H、LSIL和HSIL均需阴道镜检查。 | A | A | A |
| CRAG | 当细胞学检查结果显示ASC-H、LSIL或HSIL时，是否需要进行阴道镜检查？  答案：   - 是，所有类型（ASC-H、LSIL、HSIL、AGC）均需直接转诊阴道镜检查。   依据：   - 图2流程：除ASC-US外，其他异常类型（ASC-H、LSIL、HSIL、AGC）均需直接转诊阴道镜（图2，"其他异常类型"路径）。   - 文本支持："对于细胞学异常的ASC-H、LSIL、HSIL、AGC均应转诊阴道镜"（上下文文本）。 | A | A | A |
| Document Augmentation | 当细胞学检查结果显示ASC-H（高度鳞状上皮内病变不能除外的鳞状细胞）、LSIL（低度鳞状上皮内病变）或HSIL（高度鳞状上皮内病变）时，是否需要进行阴道镜检查？  是的。根据文档片段2和片段3，对于细胞学异常类型如ASC-H、LSIL、HSIL以及AGC（非典型腺细胞），均应直接转诊阴道镜检查。文档片段3明确说明：“对于细胞学异常的ASC-H、LSIL、HSIL、AGC均应转诊阴道镜。” | A | A | A |
| Fusion RAG | 当细胞学检查结果显示ASC-H（高度鳞状上皮内病变不能除外的鳞状细胞）、LSIL（低度鳞状上皮内病变）或HSIL（高度鳞状上皮内病变）时，是否需要进行阴道镜检查？  根据上下文信息（相关文档1和相关文档2）： - 对于细胞学异常类型如ASC-H、LSIL、HSIL（以及AGC），处理流程是直接转诊阴道镜检查，无需额外分流。 - 具体描述：相关文档1在“其他异常类型患者”部分明确“直接转诊阴道镜检查”，包括ASC-H、LSIL、HSIL；相关文档2也强调“对于细胞学异常的ASC-H、LSIL、HSIL、AGC均应转诊阴道镜”。 - 文档中一致指示这些异常类型需进行阴道镜，因此答案是肯定的。  回答： 是的，需要进行阴道镜检查。 | A | A | A |
| HyDE | 当细胞学检查结果显示ASC-H（高度鳞状上皮内病变不能除外的鳞状细胞）、LSIL（低度鳞状上皮内病变）或HSIL（高度鳞状上皮内病变）时，是否需要进行阴道镜检查？  回答： 是的，需要进行阴道镜检查。文档内容明确指出，对于ASC-H、LSIL、HSIL等异常细胞学结果，无论HPV状态如何，均需直接转诊阴道镜检查。例如：   - 第一个文档片段："其他异常类型患者（ASC-H,LSIL,HSIL,AGC以及ASC-US患者，一年复查后）：直接转诊阴道镜检查"。   - 第七个文档片段："对于细胞学异常的 ASC-H、LSIL、HSIL、AGC 均应转诊阴道镜"。   这基于这些异常类型的高风险特征（如HSIL被诊断为≥CINⅡ的概率为70%~75%），因此阴道镜检查是标准管理流程。 | A | A | A |
| Query Transformation | 当细胞学检查结果显示ASC-H（高度鳞状上皮内病变不能除外的鳞状细胞）、LSIL（低度鳞状上皮内病变）或HSIL（高度鳞状上皮内病变）时，是否需要进行阴道镜检查？  是的，需要进行阴道镜检查。文档片段1（相似度0.698）中的图二明确指出，其他异常类型患者（包括ASC-H、LSIL、HSIL）应直接转诊阴道镜检查。文档片段2（相似度0.647）和文档片段6（相似度0.567）进一步强调，对于ASC-H、LSIL、HSIL等异常结果，均应转诊阴道镜，因为这些类型具有较高的癌前病变风险。 | A | A | A |
| SelfRAG | 当细胞学检查结果显示ASC-H（高度鳞状上皮内病变不能除外的鳞状细胞）、LSIL（低度鳞状上皮内病变）或HSIL（高度鳞状上皮内病变）时，是否需要进行阴道镜检查？  根据文档中的图2处理流程：对于细胞学异常类型包括ASC-H、LSIL、HSIL的患者，均应直接转诊阴道镜检查。具体描述为："其他异常类型患者（ASC-H, LSIL, HSIL, AGC）→直接转诊阴道镜检查"，并强调："对于细胞学异常的 ASC-H、LSIL、HSIL、AGC 均应转诊阴道镜"。因此，是的，需要进行阴道镜检查。 | A | A | A |
| Semantic Chunking | 当细胞学检查结果显示ASC-H（高度鳞状上皮内病变不能除外的鳞状细胞）、LSIL（低度鳞状上皮内病变）或HSIL（高度鳞状上皮内病变）时，是否需要进行阴道镜检查？  是的，需要进行阴道镜检查。文档片段1（相似度0.698）中的图二明确指出，其他异常类型患者（包括ASC-H、LSIL、HSIL）应直接转诊阴道镜检查。文档片段2（相似度0.647）和文档片段6（相似度0.567）进一步强调，对于ASC-H、LSIL、HSIL等异常结果，均应转诊阴道镜，因为这些类型具有较高的癌前病变风险。 | A | B | A |
| NaiveRAG | 当细胞学检查结果显示ASC-H（高度鳞状上皮内病变不能除外的鳞状细胞）、LSIL（低度鳞状上皮内病变）或HSIL（高度鳞状上皮内病变）时，是否需要进行阴道镜检查？  回答： 是的，需要进行阴道镜检查。文档明确指出，对于细胞学检查结果为ASC-H、LSIL或HSIL的患者，应直接转诊阴道镜检查。例如，第二个文档片段提到："其他异常类型患者（ASC-H,LSIL,HSIL,AGC以及ASC-US患者，一年复查后）：直接转诊阴道镜检查"。在第一个文档片段中也强调："细胞学检查结果≥ASC-US（包括ASC-US、LSIL、HSIL等异常）→转诊阴道镜检查"。此外，第二个文档片段补充："对于细胞学异常的ASC-H、LSIL、HSIL、AGC均应转诊阴道镜"。因此，ASC-H、LSIL和HSIL均需阴道镜检查。 | A | A | A |
| Rerank | 当细胞学检查结果显示ASC-H（高度鳞状上皮内病变不能除外的鳞状细胞）、LSIL（低度鳞状上皮内病变）或HSIL（高度鳞状上皮内病变）时，是否需要进行阴道镜检查？  是的，需要进行阴道镜检查。   - 依据：   - 文档片段1（相关性: 0.9655）中的图二处理流程明确指出："其他异常类型患者（ASC-H, LSIL, HSIL, AGC以及ASC-US患者，一年复查后）：直接转诊阴道镜检查"。   - 文档片段3（相关性: 0.9420）进一步强调："对于细胞学异常的ASC-H、LSIL、HSIL、AGC均应转诊阴道镜"。   因此，ASC-H、LSIL或HSIL结果均直接指示转诊阴道镜，无需额外分流步骤。 | A | A | A |
| RSE | 当细胞学检查结果显示ASC-H（高度鳞状上皮内病变不能除外的鳞状细胞）、LSIL（低度鳞状上皮内病变）或HSIL（高度鳞状上皮内病变）时，是否需要进行阴道镜检查？  基于上下文信息（相关片段1中的图2和相关片段2中的2.2.3）：   - 对于细胞学异常类型包括ASC-H、LSIL、HSIL（以及AGC），均应直接转诊阴道镜检查。  - 具体流程：其他异常类型患者（ASC-H, LSIL, HSIL, AGC）→直接转诊阴道镜检查。  - 因此，是，需要进行阴道镜检查。 | A | A | A |
| Non-RAG strategy | 当细胞学检查结果显示ASC-H（高度鳞状上皮内病变不能除外的鳞状细胞）、LSIL（低度鳞状上皮内病变）或HSIL（高度鳞状上皮内病变）时，是否需要进行阴道镜检查？  是，当细胞学显示ASC-H、LSIL或HSIL时，需要进行阴道镜检查。这些结果均被视为高风险，无需HPV分流，直接推荐阴道镜以评估病变程度。 | A | A | A |
| **Question 11: 当细胞学检查结果显示AGC（意义不明的腺细胞）时，需要进行什么检查？** | | | | |
| Context Enrichment | 当细胞学检查结果显示AGC（意义不明的腺细胞）时，需要进行什么检查？  答案： 根据文档内容，当细胞学检查结果显示AGC时，必须转诊进行阴道镜检查，并加做宫颈管搔刮术（ECC）。如果可疑有子宫内膜癌风险，还应加做子宫内膜诊刮（取子宫内膜活检送病理学检查）。具体依据：  - 文档中明确提到："对于细胞学异常的 ASC-H、LSIL、HSIL、AGC 均应转诊阴道镜。对于 AGC 还特别强调要进行颈管搔刮，当可疑有子宫内膜癌风险时应做子宫内膜诊刮取子宫内膜活检送病理学检查，见图2"（相似度: 0.552 [扩展:3块,范围:58-60]）。  - 这对应于图2的处理流程，其中AGC患者需要额外检查以排除高级别病变或子宫内膜癌。  # | B | B | B |
| Contextual Chunk Headers | 当细胞学检查结果显示AGC（意义不明的腺细胞）时，需要进行什么检查？  根据文档内容，当细胞学检查结果显示AGC（非典型腺细胞）时，需要进行以下检查：  - 转诊阴道镜检查：文档片段1（图二）明确指出，AGC患者属于“其他异常类型”，应直接转诊阴道镜检查。  - 加做宫颈管搔刮（ECC）：文档片段1（图二）和文档片段3（细胞学异常处理指南）均强调，AGC患者需要加做宫颈管搔刮（ECC）以评估宫颈管情况。  - 加做HPV检测：文档片段1（图二）提到，AGC患者需要加做HPV检测，以辅助风险分层。  - 加做子宫内膜诊刮：文档片段1（图二）和文档片段3指出，当可疑有子宫内膜癌风险时，应加做子宫内膜诊刮（即子宫内膜活检）。  依据：文档片段1（正文内容）：“其他异常类型患者（ASC-H,LSIL,HSIL,AGC以及ASC-US患者，一年复查后）：直接转诊阴道镜检查，其中AGC患者需要：加做宫颈管搔刮（ECC）、加做HPV检测、加做子宫内膜诊刮。”文档片段3（正文内容）：“对于细胞学异常的ASC-H、LSIL、HSIL、AGC均应转诊阴道镜。对于AGC还特别强调要进行颈管搔刮，当可疑有子宫内膜癌风险时应做子宫内膜诊刮取子宫内膜活检送病理学检查。”  总结：AGC患者需转诊阴道镜检查，并加做ECC、HPV检测和子宫内膜诊刮（尤其当有子宫内膜癌风险时）。 | A | A | A |
| Context Compression | 当细胞学检查结果显示AGC（意义不明的腺细胞）时，需要进行什么检查？  根据文档片段1（相关性: 0.900）和文档片段6（相关性: 0.600），AGC患者需要直接转诊阴道镜检查，并加做以下额外检查：  - 宫颈管搔刮（ECC） - HPV检测 - 子宫内膜诊刮（尤其当可疑有子宫内膜癌风险时）  具体依据： - 片段1： "对于AGC（非典型腺细胞）患者：直接转诊阴道镜检查，其中AGC患者需要：加做宫颈管搔刮（ECC）、加做HPV检测、加做子宫内膜诊刮。" - 片段6： "对于AGC还特别强调要进行颈管搔刮，当可疑有子宫内膜癌风险时应做子宫内膜诊刮取子宫内膜活检送病理学检查。" | C | B | B |
| CRAG | 当细胞学检查结果显示AGC（非典型腺细胞）时，需要进行的检查  依据文档内容（图2及2.2.3章节）：   - 立即转诊阴道镜检查，并额外增加以下检查：   - 宫颈管搔刮术（ECC）   - HPV检测   - 子宫内膜诊刮（尤其可疑子宫内膜癌时）   > 来源：知识库文档图2流程及2.2.3章节（AGC患者组织病理学诊断CINⅡ/Ⅲ概率达9%~54%，浸润癌风险1%~9%）。 | A | A | A |
| Document Augmentation | 当细胞学检查结果显示AGC（意义不明的腺细胞）时，需要进行什么检查？  根据文档片段2（图2）和文档片段5的内容，对于细胞学异常类型AGC（非典型腺细胞），处理流程如下：   - 直接转诊阴道镜检查  - 加做宫颈管搔刮（ECC）  - 加做HPV检测  - 加做子宫内膜诊刮（可疑子宫内膜癌风险时）   因此，AGC患者需要转诊阴道镜，并加做ECC、HPV检测和子宫内膜诊刮（如可疑子宫内膜病变）。 | A | A | A |
| Fusion RAG | 当细胞学检查结果显示AGC（意义不明的腺细胞）时，需要进行什么检查？  根据上下文信息（主要来自相关文档1和相关文档3），当细胞学检查结果显示AGC时，需要进行以下检查：  - 直接转诊阴道镜检查。  - 加做宫颈管搔刮（ECC）。  - 加做HPV检测。  - 加做子宫内膜诊刮（尤其当可疑有子宫内膜癌风险时）。  理由：在相关文档1（图二）中明确指出，对于AGC患者，除了转诊阴道镜外，还需进行ECC、HPV检测和子宫内膜诊刮。相关文档3也强调AGC患者应转诊阴道镜，并进行颈管搔刮和子宫内膜诊刮。 | A | A | A |
| HyDE | 当细胞学检查结果显示AGC（意义不明的腺细胞）时，需要进行什么检查？  根据文档内容，当细胞学检查结果显示AGC时，需要进行以下检查：  - 转诊阴道镜检查：文档明确指出，对于细胞学异常的AGC患者，应直接转诊阴道镜检查（见[HyDE相似度: 0.526]片段："对于细胞学异常的ASC-H、LSIL、HSIL、AGC均应转诊阴道镜"）。 - 加做宫颈管搔刮（ECC）：在阴道镜检查过程中，必须进行宫颈管搔刮以评估宫颈管内病变（见[HyDE相似度: 0.628]片段："o AGC患者需要：加做宫颈管搔刮（ECC）"）。 - 加做HPV检测：作为辅助评估，建议进行HPV检测以确定高危型HPV感染状态（见[HyDE相似度: 0.628]片段："加做HPV检测"）。 - 加做子宫内膜诊刮：如果可疑子宫内膜癌风险（如不明原因出血或病史提示），应进行子宫内膜诊刮取活检送病理学检查（见[HyDE相似度: 0.526]片段："当可疑有子宫内膜癌风险时应做子宫内膜诊刮取子宫内膜活检送病理学检查"）。  综上，处理AGC的核心是阴道镜检查，并辅以ECC、HPV检测和子宫内膜诊刮（如有指征）。 | A | A | A |
| Query Transformation | 当细胞学检查结果显示AGC（意义不明的腺细胞）时，需要进行什么检查？  根据文档片段7（相似度0.582）和文档片段2（相似度0.588），当细胞学检查结果显示AGC时，需要进行以下检查：  - 转诊阴道镜检查：AGC患者必须直接转诊进行阴道镜检查。 - 加做宫颈管搔刮（ECC）：以评估宫颈管内的病变。 - 加做HPV检测：辅助判断风险。 - 加做子宫内膜诊刮：当可疑有子宫内膜癌风险时（如年龄较大、症状异常等），需进行子宫内膜活检送病理学检查。  具体依据：  - 文档片段7："对于细胞学异常的 ASC-H、LSIL、HSIL、AGC 均应转诊阴道镜。对于 AGC 还特别强调要进行颈管搔刮，当可疑有子宫内膜癌风险时应做子宫内膜诊刮取子宫内膜活检送病理学检查，见图2。" - 文档片段2："其他异常类型患者（ASC-H,LSIL,HSIL,AGC以及ASC-US患者，一年复查后）：直接转诊阴道镜检查，其中AGC患者需要：加做宫颈管搔刮（ECC）；加做HPV检测；加做子宫内膜诊刮。" | A | A | A |
| SelfRAG | 当细胞学检查结果显示AGC（意义不明的腺细胞）时，需要进行什么检查？  根据文档内容（图2处理流程部分）：  - 对于细胞学异常类型中的AGC患者，需要直接转诊阴道镜检查。 - 此外，AGC患者还需加做以下检查：  - 宫颈管搔刮（ECC）  - HPV检测  - 子宫内膜诊刮（尤其当可疑有子宫内膜癌风险时）。  文档明确说明："其他异常类型患者（ASC-H,LSIL,HSIL,AGC以及ASC-US患者，一年复查后）：直接转诊阴道镜检查，其中AGC患者需要：加做宫颈管搔刮（ECC）加做HPV检测加做子宫内膜诊刮"（来自第二个文档片段）和"对于AGC还特别强调要进行颈管搔刮，当可疑有子宫内膜癌风险时应做子宫内膜诊刮"（来自第四个文档片段）。因此，所需检查包括阴道镜检查、ECC、HPV检测和子宫内膜诊刮。 | A | B | A |
| Semantic Chunking | 当细胞学检查结果显示AGC（意义不明的腺细胞）时，需要进行什么检查？  根据文档片段7（相似度0.582）和文档片段2（相似度0.588），当细胞学检查结果显示AGC时，需要进行以下检查： - 转诊阴道镜检查：AGC患者必须直接转诊进行阴道镜检查。 - 加做宫颈管搔刮（ECC）：以评估宫颈管内的病变。 - 加做HPV检测：辅助判断风险。 - 加做子宫内膜诊刮：当可疑有子宫内膜癌风险时（如年龄较大、症状异常等），需进行子宫内膜活检送病理学检查。  具体依据： - 文档片段7："对于细胞学异常的 ASC-H、LSIL、HSIL、AGC 均应转诊阴道镜。对于 AGC 还特别强调要进行颈管搔刮，当可疑有子宫内膜癌风险时应做子宫内膜诊刮取子宫内膜活检送病理学检查，见图2。" - 文档片段2："其他异常类型患者（ASC-H,LSIL,HSIL,AGC以及ASC-US患者，一年复查后）：直接转诊阴道镜检查，其中AGC患者需要：加做宫颈管搔刮（ECC）；加做HPV检测；加做子宫内膜诊刮。" | A | A | A |
| NaiveRAG | 当细胞学检查结果显示AGC（意义不明的腺细胞）时，需要进行什么检查？  根据文档内容，当细胞学检查结果显示AGC（非典型腺细胞）时，患者需要直接转诊阴道镜检查，并额外进行以下检查：  - 加做宫颈管搔刮（ECC）：用于评估宫颈管内病变。 - 加做HPV检测：以确认高危型HPV感染状态。 - 加做子宫内膜诊刮：用于排除子宫内膜相关病变。  文档依据：[相似度: 0.552] 片段中提到："其他异常类型患者（ASC-H,LSIL,HSIL,AGC以及ASC-US患者，一年复查后）：直接转诊阴道镜检查，其中AGC患者需要：加做宫颈管搔刮（ECC）、加做HPV检测、加做子宫内膜诊刮"。这明确说明了AGC的处理流程。 | A | A | A |
| Rerank | 当细胞学检查结果显示AGC（意义不明的腺细胞）时，需要进行什么检查？  根据上下文信息，当细胞学检查结果显示AGC（非典型腺细胞）时，需要进行以下检查： - 转诊阴道镜检查：这是基础步骤，用于直接观察宫颈和阴道病变。 - 加做宫颈管搔刮（ECC）：以评估宫颈管内是否有异常。 - 加做HPV检测：用于辅助判断风险。 - 加做子宫内膜诊刮：当可疑有子宫内膜癌风险时（例如患者年龄较大或有异常出血症状），需要进行子宫内膜活检以排除子宫内膜病变。   此处理流程在多个文档片段中被明确描述（例如文档片段1和文档片段2），强调AGC患者必须进行这些额外检查，因为AGC与较高的宫颈或子宫内膜病变风险相关。知识库中未提及其他替代方案。 | A | A | A |
| RSE | 当细胞学检查结果显示AGC（意义不明的腺细胞）时，需要进行什么检查？  根据上下文信息（相关片段1的图二和相关片段2），当细胞学检查显示AGC时，需要进行以下检查：  - 转诊阴道镜检查：这是首要步骤。 - 加做宫颈管搔刮（ECC）：用于评估宫颈管内的病变。 - 加做HPV检测：以确认高危型HPV感染状态。 - 加做子宫内膜诊刮：当可疑有子宫内膜癌风险时，需进行子宫内膜活检。  理由：片段1图二明确指出“AGC患者需要：加做宫颈管搔刮（ECC）、加做HPV检测、加做子宫内膜诊刮”。片段2进一步强调“对于AGC应转诊阴道镜，还特别强调要进行颈管搔刮，当可疑有子宫内膜癌风险时应做子宫内膜诊刮”。 | A | A | A |
| Non-RAG strategy | 当细胞学检查结果显示AGC（意义不明的腺细胞）时，需要进行什么检查？ AGC（Atypical Glandular Cells）被视为高风险异常，无论HPV状态如何，均需立即进行阴道镜检查，并同时进行宫颈管取样（endocervical curettage, ECC）。对于年龄≥35岁或有异常子宫出血症状的患者，还应加做子宫内膜活检（endometrial biopsy）。 | A | A | A |
| **Question 12: 如果细胞学和高危HPV联合检测均显示阴性结果，应该进行什么其他检查？** | | | | |
| Context Enrichment | 如果细胞学和高危HPV联合检测均显示阴性结果，应该进行什么其他检查？  答案： 如果细胞学和高危HPV联合检测均显示阴性（细胞学（-）& HPV（-）），则不需要进行其他额外检查。应按照常规筛查周期继续筛查（例如，每3-5年重复联合检测）。具体依据：  - 文档中图3的处理流程规定："1. 细胞学（-）& HPV（-） 则应进行常规筛查（按常规周期继续筛查）"（相似度: 0.627 [扩展:2块,范围:0-1]）。  - 文档还补充："HPV 阴性/细胞学阴性 其风险为 $0.08\%$ ... 提示可以选择更长时间的筛查间隔(例如 5 年)"（相似度: 0.471 [扩展:3块,范围:59-61]），这支持仅需常规随访，无需额外检查。  # | A | A | A |
| Contextual Chunk Headers | 如果细胞学和高危HPV联合检测均显示阴性结果，应该进行什么其他检查？  根据文档内容，如果细胞学和高危HPV联合检测均显示阴性（即细胞学（-）& HPV（-）），无需进行其他额外检查，只需按常规筛查周期进行随访：  - 建议3年后重复联合检测：文档片段2（联合筛查异常管理指南）指出，HPV阴性/细胞学阴性的风险极低（0.08%），远低于阈值（0.26%），因此推荐3年重复宫颈癌筛查。  - 或更长时间间隔（如5年）：文档片段2提到，基于低风险，可选择更长时间的筛查间隔（例如5年）。  - 常规筛查路径：文档片段6（图三）明确说明：“细胞学（-）&HPV（-）则应进行常规筛查（按常规周期继续筛查）”。  依据：文档片段2（正文内容）：“HPV 阴性/细胞学阴性 其风险为 $0 . 0 8 \%$ ，而单独细胞学阴性的风险为 $0 . 2 6 \%$ ，3 年重复宫颈癌筛查。远低于 $0 . 2 6 \%$ 的阈值，提示可以选择更长时间的筛查间隔( 例如 5 年)。”文档片段6（正文内容）：“细胞学（-）&HPV（-） 则应进行常规筛查（按常规周期继续筛查）”。  总结：无需其他检查，只需3年或5年后重复细胞学+HPV联合检测，遵循常规筛查周期。 | A | A | A |
| Context Compression | 如果细胞学和高危HPV联合检测均显示阴性结果，应该进行什么其他检查？  根据文档片段4（相关性: 0.700），如果细胞学和高危HPV联合检测均显示阴性（即HPV阴性和细胞学阴性），不需要立即进行其他检查，而是应在3年后重复宫颈癌筛查。文档中没有提到其他额外检查。 具体依据：  - 片段4： "HPV阴性/细胞学阴性：3年重复宫颈癌筛查。" | A | A | A |
| CRAG | 细胞学+高危HPV联合检测双阴性（细胞学[-] & HPV[-]）的处理  依据文档内容（图3及2.3.1章节）：   - 常规筛查（按常规周期继续筛查），无需额外检查。  - 风险仅0.08%，远低于阈值0.26%，可延长筛查间隔至3~5年。   > 来源：知识库文档图3流程及2.3.1章节（双阴性者3年重复筛查，有条件者可5年）。 | A | A | A |
| Document Augmentation | 如果细胞学和高危HPV联合检测均显示阴性结果，应该进行什么其他检查？  根据文档片段2（2.3.1部分）和文档片段3（分支1）：   - 细胞学（-）和HPV（-）的结果风险极低（0.08%），建议3年后重复宫颈癌联合筛查（细胞学+HPV）。   文档还提到，由于风险低于阈值（0.26%），可选择更长时间间隔（如5年），但基于我国现状，共识推荐3年重复筛查。   无需其他额外检查，仅需按常规筛查周期随访。 | A | A | A |
| Fusion RAG | 如果细胞学和高危HPV联合检测均显示阴性结果，应该进行什么其他检查？  根据上下文信息（主要来自相关文档1、相关文档2和相关文档4），如果细胞学和高危HPV联合检测均显示阴性结果，应进行：  - 常规筛查（按常规筛查周期继续筛查）。具体建议为3年后重复细胞学+HPV联合检查。  理由：相关文档1（图三）和相关文档4（图三）均提到，细胞学(-) & HPV(-) 的结果应进行常规筛查。相关文档2进一步说明，HPV阴性/细胞学阴性的风险很低（0.08%），支持3年重复筛查的间隔。 | A | A | A |
| HyDE | 如果细胞学和高危HPV联合检测均显示阴性结果，应该进行什么其他检查？  根据文档内容，如果细胞学和高危HPV联合检测均显示阴性结果，不需要进行其他额外检查。文档建议：  - 进行常规筛查：风险极低（HPV阴性/细胞学阴性的风险为0.08%），远低于阈值（0.26%），因此只需按常规筛查间隔进行后续筛查（见[HyDE相似度: 0.635]片段："HPV阴性/细胞学阴性...3年重复宫颈癌筛查。远低于0.26%的阈值，提示可以选择更长时间的筛查间隔(例如5年)"）。 - 具体处理：文档在流程图（图3）中明确"细胞学(-) & HPV(-) 则应进行常规筛查（按常规周期继续筛查）"（见[HyDE相似度: 0.503]片段）。  因此，无需其他检查，仅需遵循常规筛查计划（如3-5年重复联合检测）。 | A | A | A |
| Query Transformation | 如果细胞学和高危HPV联合检测均显示阴性结果，应该进行什么其他检查？  根据文档片段3（相似度0.582）和文档片段5（相似度0.546），如果细胞学和高危HPV联合检测均显示阴性结果，不需要进行其他额外检查，应按照常规筛查间隔继续监测：  - 3年或5年后重复联合检测：风险极低（约0.08%），远低于阈值（0.26%），因此可以选择更长的筛查间隔（如5年），但标准推荐是3年重复筛查。  具体依据：  - 文档片段3："HPV 阴性/细胞学阴性 其风险为 0.08%，而单独细胞学阴性的风险为 0.26%，3 年重复宫颈癌筛查。远低于 0.26% 的阈值，提示可以选择更长时间的筛查间隔(例如 5年)。" - 文档片段5："1. 细胞学（-）& HPV（-） 则应进行常规筛查（按常规周期继续筛查）"。 | A | A | A |
| SelfRAG | 如果细胞学和高危HPV联合检测均显示阴性结果，应该进行什么其他检查？  根据文档内容（联合检测结果处理部分）：  - 当细胞学（-）和HPV（-）时，不需要进行其他额外检查。 - 应进行常规筛查，即按常规筛查间隔（如3年或5年）重复宫颈癌筛查。  文档明确说明："细胞学（-）& HPV（-） 则应进行常规筛查（按常规周期继续筛查）"（来自第三个文档片段）和"HPV 阴性/细胞学阴性...3年重复宫颈癌筛查...提示可以选择更长时间的筛查间隔(例如5年)"（来自第二个文档片段）。因此，没有其他检查要求，只需遵循常规筛查计划。 | A | A | A |
| Semantic Chunking | 如果细胞学和高危HPV联合检测均显示阴性结果，应该进行什么其他检查？  根据文档片段3（相似度0.582）和文档片段5（相似度0.546），如果细胞学和高危HPV联合检测均显示阴性结果，不需要进行其他额外检查，应按照常规筛查间隔继续监测： - 3年或5年后重复联合检测：风险极低（约0.08%），远低于阈值（0.26%），因此可以选择更长的筛查间隔（如5年），但标准推荐是3年重复筛查。  具体依据： - 文档片段3："HPV 阴性/细胞学阴性 其风险为 0.08%，而单独细胞学阴性的风险为 0.26%，3 年重复宫颈癌筛查。远低于 0.26% 的阈值，提示可以选择更长时间的筛查间隔(例如 5年)。" - 文档片段5："1. 细胞学（-）& HPV（-） 则应进行常规筛查（按常规周期继续筛查）"。 | A | A | A |
| NaiveRAG | 如果细胞学和高危HPV联合检测均显示阴性结果，应该进行什么其他检查？  根据文档内容，如果细胞学和高危HPV联合检测均显示阴性（细胞学（-）& HPV（-）），不需要进行其他额外检查，而是应进行常规筛查（按常规筛查周期继续后续检查）。文档指出，这种结果的风险很低（约0.08%），建议遵循标准筛查间隔（如3年或5年一次）。 文档依据：[相似度: 0.552] 片段中提到："HPV 阴性/细胞学阴性 其风险为 0.08%，... 3年重复宫颈癌筛查"；[相似度: 0.457] 片段中明确："细胞学（-）& HPV（-） 则应进行常规筛查（按常规周期继续筛查）"。文档未提及需要其他额外检查。 | A | A | A |
| Rerank | 如果细胞学和高危HPV联合检测均显示阴性结果，应该进行什么其他检查？  如果细胞学和高危HPV联合检测均显示阴性结果，不需要进行其他额外检查。根据上下文信息，应进行常规筛查： - 按常规筛查周期继续筛查：例如，每3年或5年重复细胞学和高危HPV联合检测。这是因为联合检测阴性的风险极低（约0.08%），远低于阈值（0.26%），支持延长筛查间隔。   此建议基于文档片段3（描述HPV阴性/细胞学阴性的管理）和文档片段5（列出检测结果分支）。知识库中未建议任何立即的额外检查（如阴道镜或影像学），仅强调定期复查。 | A | A | A |
| RSE | 如果细胞学和高危HPV联合检测均显示阴性结果，应该进行什么其他检查？  根据上下文信息（相关片段1的图三和相关片段2），如果细胞学和高危HPV联合检测均显示阴性（细胞学（-）& HPV（-）），不需要进行其他额外检查，而是：  - 进行常规筛查：按常规筛查周期继续监测，例如每3年或5年重复宫颈癌筛查。  理由：片段1图三明确说明“细胞学（-）& HPV（-）→进行常规筛查（按常规周期继续筛查）”。片段2补充“HPV阴性/细胞学阴性→风险为0.08%，3年重复宫颈癌筛查，或更长时间如5年”。上下文中未提及任何额外检查要求。 | A | A | A |
| Non-RAG strategy | 如果细胞学和高危HPV联合检测均显示阴性结果，应该进行什么其他检查？  联合检测（细胞学和高危HPV）均为阴性表示风险极低，无需进行任何额外检查。推荐按常规筛查间隔（如3年或5年）重复联合检测，具体间隔取决于年龄和筛查策略（例如，30-65岁人群推荐3年或5年筛查）。 | A | A | A |
| **Question 13: 如果细胞学和高危HPV联合检测显示HPV阴性且细胞学结果为ASC-US，下一步应该怎么做？** | | | | |
| Context Enrichment | 如果细胞学和高危HPV联合检测显示HPV阴性且细胞学结果为ASC-US，下一步应该怎么做？  答案： 如果细胞学和高危HPV联合检测显示HPV阴性且细胞学结果为ASC-US，应进行1年后复查（重复细胞学+HPV联合检测）。具体依据：  - 文档中图3的处理流程明确："2. 细胞学（ASC-US）& HPV（-） 则应进行1年复查（1年后重复联合检测）"（相似度: 0.627 [扩展:2块,范围:0-1]）。  - 文档还强调，ASC-US诊断重复性差，但HPV阴性时风险较低，因此复查是标准管理（相似度: 0.552 [扩展:3块,范围:58-60]）。  # | A | A | A |
| Contextual Chunk Headers | 如果细胞学和高危HPV联合检测显示HPV阴性且细胞学结果为ASC-US，下一步应该怎么做？  根据文档内容，如果细胞学和高危HPV联合检测显示HPV阴性且细胞学结果为ASC-US（意义不明的非典型鳞状细胞），下一步应进行1年后复查联合检测：  - 1年后重复细胞学+HPV联合检测：文档片段6（图三）明确描述了此路径：“细胞学（ASC-US）&HPV（-） 则应进行1年复查（1年后重复联合检测）”。  - 无需立即转诊阴道镜：文档片段1（图二）提到，ASC-US患者仅在HPV阳性时才需转诊阴道镜；HPV阴性时，采用保守随访。  依据：文档片段6（正文内容）：“细胞学（ASC-US）&HPV（-） 则应进行1年复查（1年后重复联合检测）”。文档片段1（图二）补充：“ASC-US患者：首先应进行HPV检测：若HPV阴性（-）→1年后应复查（重复细胞学检查）”。  总结：1年后重复细胞学+HPV联合检测，无需立即干预。 | B | A | A |
| Context Compression | 如果细胞学和高危HPV联合检测显示HPV阴性且细胞学结果为ASC-US，下一步应该怎么做？  根据文档片段1（相关性: 0.900）、文档片段2（相关性: 0.800）和文档片段4（相关性: 0.700），下一步应在1年后进行复查，具体是重复细胞学检查或细胞学与高危HPV联合检测。不需要立即转诊阴道镜或其他检查。 具体依据：  - 片段1： "如果细胞学和高危HPV联合检测显示HPV阴性且细胞学结果为ASC-US：若HPV阴性（-）→1年后应复查（重复细胞学检查）。" - 片段2： "细胞学（ASC-US）& HPV（-）则应进行1年复查（1年后重复联合检测）。" - 片段4：在表格中也有类似指示，支持1年后复查。 | A | A | A |
| CRAG | HPV阴性且细胞学ASC-US的处理  依据文档内容（图2流程及2.2.2章节）：   - 1年后重复细胞学检查：   - 若复查阴性 → 常规筛查   - 若复查≥ASC-US → 转诊阴道镜   > 来源：知识库文档图2（ASC-US分流路径）及2.2.2章节（ASC-US的CINⅢ+风险低，HPV阴性时无需立即阴道镜）。 | A | A | A |
| Document Augmentation | 如果细胞学和高危HPV联合检测显示HPV阴性且细胞学结果为ASC-US，下一步应该怎么做？  根据文档片段3（分支2）：   - 细胞学（ASC-US）和HPV（-）时，应进行1年复查（1年后重复联合检测）。   文档片段2（图3）也支持此路径：HPV阴性且细胞学ASC-US→1年复查。   因此，无需立即干预，仅需1年后重复细胞学+HPV联合检测。 | A | A | A |
| Fusion RAG | 如果细胞学和高危HPV联合检测显示HPV阴性且细胞学结果为ASC-US，下一步应该怎么做？  根据上下文信息（主要来自相关文档1和相关文档4），如果HPV阴性且细胞学结果为ASC-US，下一步应：  - 1年后重复细胞学+HPV联合检查。  理由：相关文档1（图二）中ASC-US患者的处理流程明确：若HPV阴性(-)，则1年后应复查（重复细胞学检查）。相关文档4（图三）也指出，细胞学(ASC-US) & HPV(-) 应进行1年复查（1年后重复联合检测）。 | A | A | A |
| HyDE | 如果细胞学和高危HPV联合检测显示HPV阴性且细胞学结果为ASC-US，下一步应该怎么做？  根据文档内容，如果细胞学和高危HPV联合检测显示HPV阴性且细胞学结果为ASC-US，下一步应：  - 1年后复查联合检测：文档在管理流程中明确指出，HPV阴性且细胞学ASC-US时，应进行1年后的复查（重复细胞学和高危HPV联合检测）（见[HyDE相似度: 0.503]片段："细胞学（ASC-US）& HPV（-） 则应进行1年复查（1年后重复联合检测）"）。 - 依据：ASC-US诊断重复性差，但HPV阴性时风险较低，因此优先随访而非立即干预（见[HyDE相似度: 0.526]片段："ASC-US诊断重复性差...在人群筛查中ASC-US约为5%"）。  综上，无需立即转诊阴道镜，只需安排1年后复查联合检测。 | A | A | A |
| Query Transformation | 如果细胞学和高危HPV联合检测显示HPV阴性且细胞学结果为ASC-US，下一步应该怎么做？  根据文档片段5（相似度0.546），如果细胞学和高危HPV联合检测显示HPV阴性且细胞学结果为ASC-US，下一步应：  - 1年后复查：重复细胞学和高危HPV联合检测。如果复查结果阴性，则转为常规筛查；如果复查结果异常（≥ASC-US），则转诊阴道镜检查。  具体依据：  - 文档片段5："2. 细胞学（ASC-US）& HPV（-） 则应进行1年复查（1年后重复联合检测）"。 - 文档片段2在ASC-US处理中也支持此流程："ASC-US患者：首先应进行HPV检测：若HPV阴性（-）→1年后应复查（重复细胞学检查），若复查结果为阴性则后续进行常规筛查即可，若结果大于等于ASC，则应进行阴道镜检查。" | A | A | A |
| SelfRAG | 如果细胞学和高危HPV联合检测显示HPV阴性且细胞学结果为ASC-US，下一步应该怎么做？  根据文档内容（联合检测结果处理部分）：  - 当HPV阴性且细胞学结果为ASC-US时，下一步应进行1年后复查（重复细胞学和高危HPV联合检测）。  文档明确说明："细胞学（ASC-US）& HPV（-） 则应进行1年复查（1年后重复联合检测）"（来自第三个文档片段）和"ASC-US患者：若HPV阴性（-）→1年后应复查（重复细胞学检查）"（来自第二个文档片段）。因此，不需要立即转诊阴道镜，只需安排1年后复查。 | A | A | A |
| Semantic Chunking | 如果细胞学和高危HPV联合检测显示HPV阴性且细胞学结果为ASC-US，下一步应该怎么做？  根据文档片段5（相似度0.546），如果细胞学和高危HPV联合检测显示HPV阴性且细胞学结果为ASC-US，下一步应： - 1年后复查：重复细胞学和高危HPV联合检测。如果复查结果阴性，则转为常规筛查；如果复查结果异常（≥ASC-US），则转诊阴道镜检查。  具体依据： - 文档片段5："2. 细胞学（ASC-US）& HPV（-） 则应进行1年复查（1年后重复联合检测）"。 - 文档片段2在ASC-US处理中也支持此流程："ASC-US患者：首先应进行HPV检测：若HPV阴性（-）→1年后应复查（重复细胞学检查），若复查结果为阴性则后续进行常规筛查即可，若结果大于等于ASC，则应进行阴道镜检查。" | A | A | A |
| NaiveRAG | 如果细胞学和高危HPV联合检测显示HPV阴性且细胞学结果为ASC-US，下一步应该怎么做？  根据文档内容，如果细胞学和高危HPV联合检测显示HPV阴性且细胞学结果为ASC-US，下一步应进行1年后复查（重复细胞学和高危HPV联合检测）。如果复查结果阴性，则转为常规筛查；如果复查结果异常（≥ASC-US），则需转诊阴道镜检查。 文档依据：[相似度: 0.457] 片段中明确："细胞学（ASC-US）& HPV（-） 则应进行1年复查（1年后重复联合检测）"。文档未指定其他处理。 | A | A | A |
| Rerank | 如果细胞学和高危HPV联合检测显示HPV阴性且细胞学结果为ASC-US，下一步应该怎么做？  如果细胞学和高危HPV联合检测显示HPV阴性且细胞学结果为ASC-US（意义不明的非典型鳞状细胞），下一步应： - 1年后重复细胞学和高危HPV联合检测：无需立即转诊阴道镜或其他检查，因为HPV阴性降低了高级别病变的风险。   此处理基于文档片段5（检测结果分支）和文档片段3（风险分析），其中明确指出细胞学ASC-US且HPV阴性时，应安排1年后复查。如果复查结果异常（如≥ASC-US），则转诊阴道镜；如果阴性，则转为常规筛查。知识库中未提及其他处理选项。 | A | A | A |
| RSE | 如果细胞学和高危HPV联合检测显示HPV阴性且细胞学结果为ASC-US，下一步应该怎么做？  根据上下文信息（相关片段1的图三），如果细胞学和高危HPV联合检测显示HPV阴性且细胞学结果为ASC-US（即细胞学（ASC-US）& HPV（-）），下一步应：  - 进行1年复查：在1年后重复细胞学和高危HPV联合检测。  理由：片段1图三明确说明“细胞学（ASC-US）& HPV（-）→进行1年复查（1年后重复联合检测）”。片段2未提供额外信息，但图三的处理流程已覆盖此情况。 | A | A | A |
| Non-RAG strategy | 如果细胞学和高危HPV联合检测显示HPV阴性且细胞学结果为ASC-US，下一步应该怎么做？  HPV阴性ASC-US（Atypical Squamous Cells of Undetermined Significance）的风险较低，不推荐立即阴道镜检查。下一步应进行短期随访，即在12个月时重复联合检测（细胞学和高危HPV）。如果重复检测结果正常，可返回常规筛查间隔。 | A | A | A |
| **Question 14: 如果细胞学和高危HPV联合检测显示HPV阴性且细胞学结果>ASC-US，下一步应该怎么做？是否需要阴道镜检查？** | | | | |
| Context Enrichment | 如果细胞学和高危HPV联合检测显示HPV阴性且细胞学结果>ASC-US，下一步应该怎么做？是否需要阴道镜检查？  答案： 如果细胞学和高危HPV联合检测显示HPV阴性且细胞学结果>ASC-US（如LSIL、HSIL等），则应立即转诊进行阴道镜检查。是，需要阴道镜检查。具体依据：  - 文档中图3的处理流程规定："3. 细胞学 > ASC-US（如LSIL、HSIL等）& HPV（-） 则应立即转诊阴道镜检查"（相似度: 0.627 [扩展:2块,范围:0-1]）。  - 文档还解释，细胞学结果如LSIL或HSIL提示较高风险病变，即使HPV阴性，也需阴道镜评估以排除高级别病变（相似度: 0.552 [扩展:3块,范围:58-60]）。  # | A | A | A |
| Contextual Chunk Headers | 如果细胞学和高危HPV联合检测显示HPV阴性且细胞学结果>ASC-US，下一步应该怎么做？是否需要阴道镜检查？  根据文档内容，如果细胞学和高危HPV联合检测显示HPV阴性且细胞学结果>ASC-US（即细胞学结果≥ASC-H、LSIL、HSIL等），下一步应直接转诊阴道镜检查，且需要阴道镜检查：  - 直接转诊阴道镜：文档片段1（图二）和文档片段3（细胞学异常处理指南）明确指出，对于ASC-H、LSIL、HSIL等高级别异常，无论HPV状态，均应直接转诊阴道镜。文档片段3强调，这些异常类型的CIN风险较高（例如，HSIL被诊断为≥CIN II的概率为70%~75%），因此必须阴道镜评估。  - 无需依赖HPV结果：文档片段6（图三）主要覆盖细胞学（-）和ASC-US的情况，但未明确处理细胞学>ASC-US & HPV阴性的组合。然而，文档片段1和片段3的通用原则是：细胞学异常如ASC-H、LSIL、HSIL本身即指示高风险，需阴道镜确认，HPV阴性不改变此路径。  依据：文档片段1（正文内容）：“其他异常类型患者（ASC-H,LSIL,HSIL,AGC以及ASC-US患者，一年复查后）：直接转诊阴道镜检查”。文档片段3（正文内容）：“对于细胞学异常的ASC-H、LSIL、HSIL、AGC均应转诊阴道镜。”文档片段3还提供了风险数据：“ASC-H的细胞改变具有HSIL的特征，被诊断CIN II/III的概率为24%~94%；LSIL的高危型HPV阳性率为83%，被诊断为≥CIN I的概率为10%~16%；HSIL被诊断≥CIN II的概率则为70%~75%”。  总结：下一步应直接转诊阴道镜检查，且阴道镜检查是必需的，因为细胞学高级别异常本身要求进一步评估。 | A | A | A |
| Context Compression | 如果细胞学和高危HPV联合检测显示HPV阴性且细胞学结果>ASC-US，下一步应该怎么做？是否需要阴道镜检查？  根据文档片段1（相关性: 0.900）、文档片段2（相关性: 0.800）和文档片段4（相关性: 0.700），下一步应立即转诊阴道镜检查。是的，需要阴道镜检查。 具体依据：  - 片段1： "如果细胞学和高危HPV联合检测显示HPV阴性且细胞学结果>ASC-US：细胞学检查结果≥ASC-US（包括ASC-US、LSIL、HSIL等异常）→转诊阴道镜检查。" - 片段2： "细胞学 > ASC-US（如LSIL、HSIL等）& HPV（-）则应立即转诊阴道镜检查。" - 片段4：在表格中，HPV(-) 且 细胞学 >ASC-US → 阴道镜。 | A | A | A |
| CRAG | HPV阴性但细胞学>ASC-US（如LSIL/HSIL）的处理  依据文档内容（图3流程及2.2.3章节）：   - 立即转诊阴道镜检查。  - 无需考虑HPV结果：因细胞学高级别异常（如HSIL）本身提示≥CINⅡ风险达70%~75%。   > 来源：知识库文档图3流程（>ASC-US分支）及2.2.3章节（HSIL的CINⅡ+概率极高）。 | A | A | A |
| Document Augmentation | 如果细胞学和高危HPV联合检测显示HPV阴性且细胞学结果>ASC-US，下一步应该怎么做？是否需要阴道镜检查？  根据文档片段3（分支3）：   - 细胞学 > ASC-US（如LSIL、HSIL等）且HPV（-）时，应立即转诊阴道镜检查。   文档片段2（2.3.3部分）未直接针对此情况，但分支3的流程明确要求转诊阴道镜。   因此，需要立即转诊阴道镜检查，无需等待或复查。 | A | A | A |
| Fusion RAG | 如果细胞学和高危HPV联合检测显示HPV阴性且细胞学结果>ASC-US，下一步应该怎么做？是否需要阴道镜检查？  根据上下文信息（主要来自相关文档1和相关文档3），如果HPV阴性且细胞学结果>ASC-US（包括ASC-H、LSIL、HSIL等异常类型），下一步应：  - 直接转诊阴道镜检查。  理由：相关文档1（图二）中明确指出，对于其他异常类型患者（如ASC-H、LSIL、HSIL、AGC），无论HPV状态如何，均应直接转诊阴道镜检查。相关文档3也支持这一处理，强调ASC-H、LSIL、HSIL等异常类型均应转诊阴道镜。上下文未提及HPV阴性时例外，因此需要阴道镜检查。 | A | A | A |
| HyDE | 如果细胞学和高危HPV联合检测显示HPV阴性且细胞学结果>ASC-US，下一步应该怎么做？是否需要阴道镜检查？  根据文档内容，如果细胞学和高危HPV联合检测显示HPV阴性且细胞学结果>ASC-US（如LSIL、HSIL等），下一步应：  - 立即转诊阴道镜检查：文档在流程图（图3）中明确处理："细胞学 > ASC-US（如LSIL、HSIL等）& HPV（-） 则应立即转诊阴道镜检查"（见[HyDE相似度: 0.503]片段）。 - 需要阴道镜检查：文档强调，细胞学结果>ASC-US（如LSIL或HSIL）即使HPV阴性，也提示较高风险（例如LSIL被诊断为≥CIN I的概率为8%~16%，HSIL为70%~75%），因此必须通过阴道镜进行组织学确诊（见[HyDE相似度: 0.526]片段："对于细胞学异常的ASC-H、LSIL、HSIL...均应转诊阴道镜"）。  综上，必须进行阴道镜检查以排除高级别病变。 | A | A | A |
| Query Transformation | 如果细胞学和高危HPV联合检测显示HPV阴性且细胞学结果>ASC-US，下一步应该怎么做？是否需要阴道镜检查？  根据文档片段5（相似度0.546），如果细胞学和高危HPV联合检测显示HPV阴性且细胞学结果>ASC-US（如LSIL、HSIL等），下一步应：  - 立即转诊阴道镜检查：不需要其他中间步骤，直接进行阴道镜检查以评估病变。  具体依据：  - 文档片段5："3. 细胞学 > ASC-US（如LSIL、HSIL等）& HPV（-） 则应立即转诊阴道镜检查"。 - 文档片段7也提到细胞学异常如LSIL、HSIL的处理需转诊阴道镜，但本问题具体针对联合检测HPV阴性的场景，文档片段5提供了直接答案。 | A | A | A |
| SelfRAG | 如果细胞学和高危HPV联合检测显示HPV阴性且细胞学结果>ASC-US，下一步应该怎么做？是否需要阴道镜检查？  根据文档内容（联合检测结果处理部分）：  - 当HPV阴性且细胞学结果>ASC-US（如LSIL、HSIL等）时，下一步应立即转诊阴道镜检查。 - 需要阴道镜检查。  文档明确说明："细胞学 > ASC-US（如LSIL、HSIL等）& HPV（-） 则应立即转诊阴道镜检查"（来自第三个文档片段）。此外，文档强调此类情况风险较高，必须进行阴道镜评估。因此，需要阴道镜检查。 | A | A | A |
| Semantic Chunking | 如果细胞学和高危HPV联合检测显示HPV阴性且细胞学结果>ASC-US，下一步应该怎么做？是否需要阴道镜检查？  根据文档片段5（相似度0.546），如果细胞学和高危HPV联合检测显示HPV阴性且细胞学结果>ASC-US（如LSIL、HSIL等），下一步应： - 立即转诊阴道镜检查：不需要其他中间步骤，直接进行阴道镜检查以评估病变。  具体依据： - 文档片段5："3. 细胞学 > ASC-US（如LSIL、HSIL等）& HPV（-） 则应立即转诊阴道镜检查"。 - 文档片段7也提到细胞学异常如LSIL、HSIL的处理需转诊阴道镜，但本问题具体针对联合检测HPV阴性的场景，文档片段5提供了直接答案。 | A | A | A |
| NaiveRAG | 如果细胞学和高危HPV联合检测显示HPV阴性且细胞学结果>ASC-US，下一步应该怎么做？是否需要阴道镜检查？  根据文档内容，如果细胞学和高危HPV联合检测显示HPV阴性且细胞学结果>ASC-US（如LSIL、HSIL等），应立即转诊阴道镜检查。文档明确指出，这种情况下需要阴道镜检查以评估潜在高级别病变。 文档依据：[相似度: 0.457] 片段中明确："细胞学 > ASC-US（如LSIL、HSIL等）& HPV（-） 则应立即转诊阴道镜检查"。因此，需要阴道镜检查。 | A | A | A |
| Rerank | 如果细胞学和高危HPV联合检测显示HPV阴性且细胞学结果>ASC-US，下一步应该怎么做？是否需要阴道镜检查？  如果细胞学和高危HPV联合检测显示HPV阴性且细胞学结果>ASC-US（例如LSIL、HSIL等），下一步应： - 立即转诊阴道镜检查：无论HPV结果如何，细胞学结果>ASC-US（如LSIL或HSIL）直接指示高风险，必须进行阴道镜评估。 - 需要阴道镜检查：是必需的，因为即使HPV阴性，细胞学高级别异常仍提示潜在高级别鳞状上皮内病变（HSIL）或癌变风险。   此结论基于文档片段5（检测结果分支）和文档片段3（管理流程），其中明确规定细胞学>ASC-US且HPV阴性时应转诊阴道镜。知识库中未提到例外情况或替代方案。 | A | A | A |
| RSE | 如果细胞学和高危HPV联合检测显示HPV阴性且细胞学结果>ASC-US，下一步应该怎么做？是否需要阴道镜检查？  根据上下文信息（相关片段1的图三），如果细胞学和高危HPV联合检测显示HPV阴性且细胞学结果>ASC-US（例如LSIL、HSIL等），下一步应：  - 立即转诊阴道镜检查：不需要其他中间步骤。 - 是否需要阴道镜检查？：是，必须进行阴道镜检查。  理由：片段1图三明确说明“细胞学 > ASC-US & HPV（-）→立即转诊阴道镜检查”。片段2支持此点，指出“对于HSIL等，被诊断≥CIN II的概率高，应转诊阴道镜”。上下文未列出例外情况。 | A | B | A |
| Non-RAG strategy | 如果细胞学和高危HPV联合检测显示HPV阴性且细胞学结果>ASC-US，下一步应该怎么做？是否需要阴道镜检查？  细胞学结果>ASC-US（包括ASC-H、LSIL、HSIL等）即使HPV阴性，也视为高风险异常。下一步必须进行阴道镜检查（colposcopy），因为细胞学异常本身提示潜在高级别病变风险。阴道镜检查是必需的，无需额外其他检查。 | A | A | A |
| **Question 15: 在宫颈癌检测中，如果细胞学和高危HPV联合检测显示HPV阳性且细胞学结果≥ASC-US，应该进行什么具体检查？** | | | | |
| Context Enrichment | 在宫颈癌检测中，如果细胞学和高危HPV联合检测显示HPV阳性且细胞学结果≥ASC-US，应该进行什么具体检查？  答案： 如果细胞学和高危HPV联合检测显示HPV阳性且细胞学结果≥ASC-US，应进行HPV分型检测，并根据分型结果细分处理：  - 若HPV分型检测为HPV16/18阳性： 立即转诊阴道镜检查。  - 若HPV分型检测为HPV16/18阴性但其他12型高危HPV阳性： 建议1年后复查（重复细胞学+HPV联合检测）。  - 若HPV未分型检测阳性： 直接转诊阴道镜检查。  - 具体依据：  - 文档中图3的处理流程："5. 细胞学 ≥ ASC-US & HPV（+） 则应进行进一步分诊（根据HPV分型结果细分）：- 若HPV分型检测阳性：* HPV16/18阳性 → 立即转诊阴道镜 * HPV16/18阴性但其他12型高危HPV阳性 → 1年复查 - 若HPV未分型检测阳性： 则应直接转诊阴道镜"（相似度: 0.627 [扩展:2块,范围:0-1]）。  - 文档还补充，HPV16/18阳性风险较高，需立即干预；其他类型可年度复查（相似度: 0.471 [扩展:3块,范围:59-61]）。  所有回答均基于文档中的具体流程图和文本描述。文档覆盖了这些问题的处理流程，因此没有“未找到答案”的情况。如果您需要更多细节或文档中的图表引用，请提供进一步指示。 | A | A | A |
| Contextual Chunk Headers | 在宫颈癌检测中，如果细胞学和高危HPV联合检测显示HPV阳性且细胞学结果≥ASC-US，应该进行什么具体检查？  根据文档内容，如果细胞学和高危HPV联合检测显示HPV阳性且细胞学结果≥ASC-US（包括ASC-US、LSIL、HSIL等），具体检查取决于HPV分型结果：  - 如果HPV分型检测显示HPV16/18阳性：立即转诊阴道镜检查。  - 如果HPV分型检测显示HPV16/18阴性但其他12型阳性：建议1年后复查（重复细胞学+HPV联合检测）。  - 如果未进行HPV分型检测（HPV未分型）：直接转诊阴道镜检查。  依据：文档片段6（图三）详细描述了此流程：“细胞学（ASC-US）&HPV（+） 则应进行进一步分诊（根据HPV分型结果细分）：HPV分型检测（+）：HPV16/18（+）→立即转诊阴道镜；HPV16/18（-）但其他12型（+）→1年复查；HPV未分型检测（+）：则应进行直接转诊阴道镜”。文档片段2（2.3.2部分）补充：“HPV 阳性 /ASC-US 其 5 年 CIN Ⅲ+ 的累积风险为 $6 . 8 \%$ ，高于 LSIL 风险，依据同等风险同等管理，支持直接转诊阴道镜”，但分型细化在片段6中更完整。  总结：具体检查路径基于HPV分型：HPV16/18阳性→立即阴道镜；其他12型阳性→1年复查；未分型→直接阴道镜。这确保了高风险患者（如HPV16/18阳性）得到及时干预。 | A | A | A |
| Context Compression | 在宫颈癌检测中，如果细胞学和高危HPV联合检测显示HPV阳性且细胞学结果≥ASC-US，应该进行什么具体检查？  根据文档片段1（相关性: 0.900）和文档片段2（相关性: 0.800），应首先进行HPV分型检测，然后根据分型结果决定后续检查：  - 如果HPV分型检测显示HPV16/18阳性：立即转诊阴道镜检查。 - 如果HPV分型检测显示HPV16/18阴性但其他12型高危HPV阳性：1年后复查（重复细胞学和高危HPV联合检测）。 - 如果HPV未进行分型检测（即未分型阳性）：直接转诊阴道镜检查。  具体依据： - 片段1： "如果细胞学和高危HPV联合检测显示HPV阳性且细胞学结果≥ASC-US：HPV分型路径：HPV16/18阳性→立即转诊阴道镜检查；HPV16/18阴性或其他12型阳性→进行宫颈细胞学检查；细胞学检查路径：细胞学检查结果≥ASC-US→转诊阴道镜检查。"（注意：这里提到“进行宫颈细胞学检查”，但细胞学已≥ASC-US，因此可能直接转诊阴道镜；片段2更清晰地指定了1年复查）。 - 片段2： "细胞学 ≥ ASC-US & HPV（+）则应进行进一步分诊（根据HPV分型结果细分）：若HPV分型检测阳性：HPV16/18阳性 → 立即转诊阴道镜；HPV16/18阴性但其他12型高危HPV阳性 → 1年复查；若HPV未分型检测阳性：则应直接转诊阴道镜。" | B | A | A |
| CRAG | HPV阳性且细胞学≥ASC-US的处理  依据文档内容（图3流程及2.3.3章节）：   - 根据HPV分型进一步分流：   - HPV16/18阳性 → 立即转诊阴道镜   - 其他12型高危HPV阳性 → 1年后联合复查（细胞学+HPV）   - HPV未分型检测阳性 → 直接转诊阴道镜   > 来源：知识库文档图3流程及2.3.3章节（强调我国HPV检测现状需结合分型结果管理）。 | A | A | A |
| Document Augmentation | 在宫颈癌检测中，如果细胞学和高危HPV联合检测显示HPV阳性且细胞学结果≥ASC-US，应该进行什么具体检查？  根据文档片段3（分支5）和文档片段2（图3）：   - 细胞学 ≥ ASC-US 且 HPV（+）时，应根据HPV分型结果进一步分诊：   - 若HPV分型检测为阳性：   - HPV16/18阳性 → 立即转诊阴道镜   - HPV16/18阴性但其他12型高危阳性 → 1年复查（重复联合检测）   - 若HPV未分型检测阳性 → 直接转诊阴道镜   因此，具体检查取决于是否进行分型：分型则按16/18结果分流，未分型则直接阴道镜。 | A | B | A |
| Fusion RAG | 在宫颈癌检测中，如果细胞学和高危HPV联合检测显示HPV阳性且细胞学结果≥ASC-US，应该进行什么具体检查？  根据上下文信息（主要来自相关文档1、相关文档2和相关文档4），如果HPV阳性且细胞学结果≥ASC-US，应进行以下具体检查：  - 转诊阴道镜检查。  - 根据HPV分型结果进一步细分处理：   - 如果已进行HPV分型检测：   - HPV16/18阳性 → 立即转诊阴道镜。   - HPV16/18阴性但其他12型阳性 → 1年后复查（重复联合检测）。   - 如果未进行HPV分型检测 → 直接转诊阴道镜。  理由：相关文档1（图三）和相关文档4（图三）详细描述了细胞学(ASC-US) & HPV(+) 的处理流程，强调需根据HPV分型结果分流。相关文档2（2.3.2）也支持HPV阳性/ASC-US直接转诊阴道镜。对于细胞学结果≥ASC-US（如LSIL或HSIL），上下文（相关文档1图二）表明这些异常类型直接转诊阴道镜，因此处理类似。 | A | A | A |
| HyDE | 在宫颈癌检测中，如果细胞学和高危HPV联合检测显示HPV阳性且细胞学结果≥ASC-US，应该进行什么具体检查？  根据文档内容，如果细胞学和高危HPV联合检测显示HPV阳性且细胞学结果≥ASC-US，应进行以下具体检查：  - 进一步分诊基于HPV分型结果：  - 若HPV分型检测可用：  - HPV16/18阳性：立即转诊阴道镜检查（见[HyDE相似度: 0.503]片段："HPV16/18阳性 → 立即转诊阴道镜"）。  - HPV16/18阴性但其他12型高危HPV阳性：1年后复查（重复联合检测），无需立即阴道镜（见[HyDE相似度: 0.503]片段："HPV16/18阴性但其他12型高危HPV阳性 → 1年复查"）。  - 若HPV未分型检测：直接转诊阴道镜检查，因为无法区分高危亚型（见[HyDE相似度: 0.503]片段："若HPV未分型检测阳性：则应直接转诊阴道镜"）。 - 依据：文档在联合检测异常处理流程中详细描述了此分诊逻辑（见[HyDE相似度: 0.503]片段："细胞学 ≥ ASC-US & HPV（+） 则应进行进一步分诊..."），并强调HPV阳性且细胞学≥ASC-US时风险较高（5年CIN III+累积风险为6.8%），需个体化处理。  综上，核心是阴道镜检查，但具体路径取决于HPV分型结果。 | A | A | A |
| Query Transformation | 在宫颈癌检测中，如果细胞学和高危HPV联合检测显示HPV阳性且细胞学结果≥ASC-US，应该进行什么具体检查？  根据文档片段5（相似度0.546）和文档片段3（相似度0.582），如果细胞学和高危HPV联合检测显示HPV阳性且细胞学结果≥ASC-US，应进行HPV分型检测，并根据分型结果细分处理：  - 若HPV分型检测阳性：  - HPV16/18阳性：立即转诊阴道镜检查。  - HPV16/18阴性但其他12型高危HPV阳性：1年后复查（重复细胞学和HPV联合检测）。 - 若HPV未分型检测阳性：直接转诊阴道镜检查。  具体依据：  - 文档片段5："5. 细胞学 ≥ ASC-US & HPV（+） 则应进行进一步分诊（根据HPV分型结果细分）：- 若HPV分型检测阳性：* HPV16/18阳性 → 立即转诊阴道镜 * HPV16/18阴性但其他12型高危HPV阳性 → 1年复查 - 若HPV未分型检测阳性： 则应直接转诊阴道镜"。 - 文档片段3在HPV阳性/细胞学阴性部分提到分型处理，但本问题针对细胞学≥ASC-US，文档片段5提供了完整流程。 | B | A | A |
| SelfRAG | 在宫颈癌检测中，如果细胞学和高危HPV联合检测显示HPV阳性且细胞学结果≥ASC-US，应该进行什么具体检查？  根据文档内容（联合检测结果处理部分）：  - 当HPV阳性且细胞学结果≥ASC-US时，应进行HPV分型检测以进一步分诊：  - 如果HPV分型检测显示HPV16/18阳性，则立即转诊阴道镜检查。  - 如果HPV分型检测显示HPV16/18阴性但其他12型高危HPV阳性，则进行1年复查（重复联合检测）。  - 如果HPV未进行分型检测（即未分型阳性），则直接转诊阴道镜检查。  文档明确说明："细胞学 ≥ ASC-US & HPV（+） 则应进行进一步分诊（根据HPV分型结果细分）：- 若HPV分型检测阳性：* HPV16/18阳性 → 立即转诊阴道镜 * HPV16/18阴性但其他12型高危HPV阳性 → 1年复查 - 若HPV未分型检测阳性：则应直接转诊阴道镜"（来自第三个文档片段）。因此，具体检查取决于HPV分型结果，但核心是进行分型检测以决定后续步骤。 | A | A | A |
| Semantic Chunking | 在宫颈癌检测中，如果细胞学和高危HPV联合检测显示HPV阳性且细胞学结果≥ASC-US，应该进行什么具体检查？  根据文档片段5（相似度0.546）和文档片段3（相似度0.582），如果细胞学和高危HPV联合检测显示HPV阳性且细胞学结果≥ASC-US，应进行HPV分型检测，并根据分型结果细分处理： - 若HPV分型检测阳性：  - HPV16/18阳性：立即转诊阴道镜检查。  - HPV16/18阴性但其他12型高危HPV阳性：1年后复查（重复细胞学和HPV联合检测）。 - 若HPV未分型检测阳性：直接转诊阴道镜检查。  具体依据： - 文档片段5："5. 细胞学 ≥ ASC-US & HPV（+） 则应进行进一步分诊（根据HPV分型结果细分）：- 若HPV分型检测阳性：* HPV16/18阳性 → 立即转诊阴道镜 * HPV16/18阴性但其他12型高危HPV阳性 → 1年复查 - 若HPV未分型检测阳性： 则应直接转诊阴道镜"。 - 文档片段3在HPV阳性/细胞学阴性部分提到分型处理，但本问题针对细胞学≥ASC-US，文档片段5提供了完整流程。 | B | A | A |
| NaiveRAG | 在宫颈癌检测中，如果细胞学和高危HPV联合检测显示HPV阳性且细胞学结果≥ASC-US，应该进行什么具体检查？  根据文档内容，如果细胞学和高危HPV联合检测显示HPV阳性且细胞学结果≥ASC-US，应进行进一步分诊，具体取决于HPV分型检测的结果：  - 若已进行HPV分型检测：  - HPV16/18阳性：立即转诊阴道镜检查。  - HPV16/18阴性但其他12型高危HPV阳性：建议1年后复查（重复联合检测）。 - 若未进行HPV分型检测（HPV未分型阳性）：直接转诊阴道镜检查。  文档依据：[相似度: 0.457] 片段中明确："细胞学 ≥ ASC-US & HPV（+） 则应进行进一步分诊（根据HPV分型结果细分）：- 若HPV分型检测阳性：* HPV16/18阳性 → 立即转诊阴道镜 * HPV16/18阴性但其他12型高危HPV阳性 → 1年复查 - 若HPV未分型检测阳性：则应直接转诊阴道镜"。文档未提及其他具体检查，仅基于分型结果决定后续步骤。 | A | A | A |
| Rerank | 在宫颈癌检测中，如果细胞学和高危HPV联合检测显示HPV阳性且细胞学结果≥ASC-US，应该进行什么具体检查？  如果细胞学和高危HPV联合检测显示HPV阳性且细胞学结果≥ASC-US，应进行以下具体检查，具体取决于HPV分型结果： - 如果已进行HPV分型检测：  - HPV16/18阳性：立即转诊阴道镜检查（因为HPV16/18与高癌变风险相关）。  - HPV16/18阴性但其他12型高危HPV阳性：1年后重复细胞学和高危HPV联合检测（无需立即阴道镜）。 - 如果未进行HPV分型检测（HPV不分型阳性）：直接转诊阴道镜检查（因为无法区分高风险亚型）。   此流程在文档片段5（检测结果分支）和文档片段3（联合筛查异常管理）中被详细描述。知识库中未提及其他检查（如ECC或影像学），除非阴道镜检查发现异常。 | A | A | A |
| RSE | 在宫颈癌检测中，如果细胞学和高危HPV联合检测显示HPV阳性且细胞学结果≥ASC-US，应该进行什么具体检查？  根据上下文信息（相关片段1的图三和相关片段2），如果细胞学和高危HPV联合检测显示HPV阳性且细胞学结果≥ASC-US（即细胞学 ≥ ASC-US & HPV（+）），应进行以下具体检查，具体取决于HPV分型结果：  - 若HPV分型检测阳性：  - HPV16/18阳性：立即转诊阴道镜检查。  - HPV16/18阴性但其他12型高危HPV阳性：进行1年复查（1年后重复联合检测）。 - 若HPV未分型检测阳性：直接转诊阴道镜检查。  理由：片段1图三明确说明“细胞学 ≥ ASC-US & HPV（+）→进行进一步分诊（根据HPV分型结果细分）”，并详细列出上述路径。片段2补充“HPV阳性/ASC-US支持直接转诊阴道镜”，但整体流程以图三为准。 | A | A | A |
| Non-RAG strategy | 在宫颈癌检测中，如果细胞学和高危HPV联合检测显示HPV阳性且细胞学结果≥ASC-US，应该进行什么具体检查？  HPV阳性且细胞学≥ASC-US（包括ASC-US、LSIL、ASC-H、HSIL等）表示高风险，应立即进行阴道镜检查（colposcopy）。具体检查包括：阴道镜下宫颈活检（cervical biopsy），必要时加做宫颈管取样（ECC）。如果活检结果提示高级别病变，需进一步评估治疗。 | B | B | B |
| **Question 16: 在宫颈癌检测中，如果细胞学和高危HPV联合检测显示HPV阳性且细胞学结果为阴性，应该进行什么具体检查？** | | | | |
| Context Enrichment | 在宫颈癌检测中，如果细胞学和高危HPV联合检测显示HPV阳性且细胞学结果为阴性，应该进行什么具体检查？  根据文档中的图3（细胞学+高危型HPV联合检测结果异常的处理流程）：   - 当细胞学结果为阴性（-）且HPV检测为阳性（+）时，处理流程为：建议1年后重复细胞学+HPV联合检查（即1年复查）。   文档明确指出（图3第4点）："细胞学（-）& HPV（+）则应进行1年复查（1年后重复联合检测）"。   因此，具体检查是：1年后重复细胞学和HPV联合检测，无需立即进行其他检查。 | A | A | A |
| Contextual Chunk Headers | 细胞学和高危HPV联合检测显示HPV阳性且细胞学阴性时的处理  具体检查：需根据HPV分型结果决定：  - 若HPV分型检测显示HPV16/18阳性，则立即转诊阴道镜检查（文档片段1，块编号1；文档片段2，块编号59）。  - 若HPV分型为其他12型阳性，则建议1年后重复细胞学+HPV联合检查（文档片段1，块编号1；文档片段3，块编号2）。  - 若未进行HPV分型检测，则必须进行细胞学检查（文档片段1，块编号1）。 | A | A | A |
| Context Compression | 在宫颈癌检测中，如果细胞学和高危HPV联合检测显示HPV阳性且细胞学结果为阴性，应该进行什么具体检查？  基于文档片段1、3和7：   - 首先，应进行HPV分型检测以确定具体的高危HPV类型（片段1和3提到HPV分型路径）。  - 如果HPV分型检测显示HPV16/18阳性，则立即转诊进行阴道镜检查（片段1： "HPV16/18阳性→立即转诊阴道镜检查"；片段3： "HPV16/18阳性 → 立即转诊阴道镜"）。  - 如果HPV分型检测显示HPV16/18阴性但其他12型高危HPV阳性，则建议进行1年后重复细胞学和HPV联合检查（年度复查），不需立即阴道镜检查（片段1： "HPV16/18阴性或其他12型阳性→进行宫颈细胞学检查...其他12型阳性且细胞学阴性→年度复查"；片段3： "HPV16/18阴性但其他12型高危HPV阳性 → 1年复查"）。  - 如果没有进行HPV分型检测，则建议结合临床症状和体征（如异常出血等），必要时直接转诊阴道镜检查（片段7： "HPV没有分型检测，建议结合临床症状和体征，必要时直接转诊阴道镜检查"）。   综上，具体检查步骤为：优先进行HPV分型检测，然后根据分型结果决定后续行动（立即阴道镜或1年复查）；如未分型，则临床评估后可能转诊阴道镜。 | A | A | A |
| CRAG | HPV阳性且细胞学阴性时的具体检查  知识库依据（图3流程）：  当联合检测显示 HPV阳性(+) + 细胞学阴性(-) 时：  → 需进行HPV分型检测：    - 若分型为HPV16/18阳性 → 立即转诊阴道镜检查（图3分支4）   - 若为其他12型高危HPV阳性 → 1年后重复联合检测（细胞学+HPV）   → 若未分型检测：直接转诊阴道镜检查（图3分支5）   > 结论：必须优先明确HPV分型。若未分型则需阴道镜；若分型为非16/18型，仅需年度复查。 | A | A | A |
| Document Augmentation | 在宫颈癌检测中，如果细胞学和高危HPV联合检测显示HPV阳性且细胞学结果为阴性，应该进行什么具体检查？  根据文档片段2和3，细胞学（-）& HPV（+）的结果应进行1年复查（1年后重复细胞学+HPV联合检测）。如果HPV未分型，建议结合临床症状和体征，必要时直接转诊阴道镜检查（文档片段3）。因此，具体检查是：1年后重复细胞学+HPV联合检测；如果HPV未分型，可能需阴道镜检查。 | B | B | B |
| Fusion RAG | 在宫颈癌检测中，如果细胞学和高危HPV联合检测显示HPV阳性且细胞学结果为阴性，应该进行什么具体检查？  根据上下文信息：  - 文档1（图3）明确指出：“细胞学（-）&HPV（+）则应进行1年复查（1年后重复联合检测）”。  - 文档2（2.3.3节）提到：“HPV阳性/细胞学阴性时，如果没有分型检测，建议结合临床症状和体征，必要时直接转诊阴道镜检查”。  - 文档3（图3部分）同样说明：“细胞学（-）&HPV（+）则应进行1年复查（1年后重复联合检测）”。   因此，具体检查应为：1年后重复细胞学和高危HPV联合检测。如果HPV未分型，需结合临床症状和体征，必要时转诊阴道镜检查。 | A | A | A |
| HyDE | HPV阳性且细胞学阴性时的具体检查  答案：   根据联合筛查结果异常管理流程（图3）：   - 若HPV未分型检测：需结合临床症状和体征，必要时直接转诊阴道镜检查（上下文信息第1段，2.3.3条款）。   - 若HPV分型检测为其他12型阳性：建议1年后复查（重复细胞学+HPV联合检测）（上下文信息第1段，2.3.3条款；第2段图4分支5）。 | A | B | A |
| Query Transformation | 在宫颈癌检测中，如果细胞学和高危HPV联合检测显示HPV阳性且细胞学结果为阴性，应该进行什么具体检查？  基于文档内容，当细胞学和高危HPV联合检测显示HPV阳性且细胞学结果为阴性时，应首先进行HPV分型检测（如果尚未进行分型）。具体处理流程如下：  - 如果HPV分型检测显示HPV16/18阳性：立即转诊阴道镜检查（文档片段1、2、3均提到此点，例如片段1的“分支5”和片段3的“HPV分型时HPV16、18阳性，立即转诊阴道镜”）。 - 如果HPV分型检测显示其他12型高危HPV阳性：建议1年后重复细胞学+HPV联合检查（文档片段1的“HPV16/18阴性但其他12型高危HPV阳性 → 1年复查”）。 - 如果HPV未进行分型检测（即不分型阳性）：建议直接转诊阴道镜检查，或结合临床症状和体征决定（文档片段3的“HPV没有分型检测，建议结合临床症状和体征，必要时直接转诊阴道镜检查”）。  综上，具体检查取决于HPV分型结果：分型后根据结果选择阴道镜或1年复查；未分型时优先考虑阴道镜检查。 | A | A | A |
| SelfRAG | 在宫颈癌检测中，如果细胞学和高危HPV联合检测显示HPV阳性且细胞学结果为阴性，应该进行什么具体检查？  根据文档中的图3（细胞学+高危型HPV联合检测结果异常的处理流程），具体描述如下：   - 处理流程分支4：细胞学（-）& HPV（+） → 应进行1年后重复细胞学+高危型HPV联合检查（即年度复查）。   文档明确指出："4. 细胞学（-）& HPV（+） 则应进行1年复查（1年后重复联合检测）"。   因此，具体检查是：1年后重复细胞学和高危型HPV联合检测。不需要立即转诊阴道镜或其他检查。 | C | B | B |
| Semantic Chunking | 在宫颈癌检测中，如果细胞学和高危HPV联合检测显示HPV阳性且细胞学结果为阴性，应该进行什么具体检查？  根据上下文信息（文档片段1、文档片段3）：  - 当联合检测结果为高危型HPV阳性（HPV(+)）且细胞学阴性（cellulogy(-)）时，应进行1年后重复细胞学和HPV联合检测。   例如：   - 文档片段1提到：“细胞学检查结果阴性（-）→建议1年后重复细胞学+HPV联合检查”。   - 文档片段3进一步说明：“根据检测结果分为4种分支：...细胞学（-）& HPV（+）→则应进行1年复查（1年后重复联合检测）”。  因此，具体检查是年度复查联合检测（即1年后重复相同的细胞学和HPV联合测试），无需立即转诊阴道镜或其他额外检查。 | B | B | B |
| NaiveRAG | 在宫颈癌检测中，如果细胞学和高危HPV联合检测显示HPV阳性且细胞学结果为阴性，应该进行什么具体检查？  根据文档内容（特别是相似度0.620和0.623的片段）：   - 如果HPV分型检测可用：   - HPV16/18阳性：立即转诊阴道镜检查。   - HPV16/18阴性但其他12型高危HPV阳性：建议1年后重复细胞学+HPV联合检查（即年度复查）。  - 如果HPV未分型检测（即未进行分型）：建议结合临床症状和体征，必要时直接转诊阴道镜检查。   具体检查步骤总结：   1. 优先进行HPV分型检测（如果尚未进行）。  2. 根据分型结果：   - HPV16/18阳性 → 阴道镜检查。   - 其他12型阳性 → 1年后重复联合检测（细胞学+HPV）。  3. 如果未分型 → 直接转诊阴道镜检查（文档强调“必要时”基于临床判断）。   文档依据：相似度0.620片段中的“2.3.3 HPV阳性 /细胞学阴性：① HPV分型时HPV16、18阳性，立即转诊阴道镜; ② HPV没有分型检测，建议结合临床症状和体征，必要时直接转诊阴道镜检查”和相似度0.623片段中的“4. 细胞学（-）& HPV（+） 则应进行1年复查”。 | A | A | A |
| Rerank | 在宫颈癌检测中，如果细胞学和高危HPV联合检测显示HPV阳性且细胞学结果为阴性，应该进行什么具体检查？  根据上下文信息，细胞学和高危HPV联合检测显示HPV阳性且细胞学阴性时，应进行1年后重复联合检测（细胞学+HPV检测）。   - 依据：文档片段2（相关性: 0.9854）明确指出："细胞学（-）& HPV（+）则应进行1年复查（1年后重复联合检测）"。文档片段4（相关性: 0.9653）也提到："HPV阳性 /细胞学阴性 → 则应进行1年复查（1年后重复联合检测）"。  - 具体步骤：建议1年后重复细胞学和高危HPV联合检测，以监测病变变化。如果复查结果异常，则根据新结果进入相应处理路径（如转诊阴道镜）。 | B | B | B |
| RSE | 在宫颈癌检测中，如果细胞学和高危HPV联合检测显示HPV阳性且细胞学结果为阴性，应该进行什么具体检查？  基于上下文信息（相关片段1中的图3：细胞学+高危型HPV联合检测结果异常的处理流程），当细胞学结果为阴性（-）且高危HPV检测为阳性（+）时，应进行1年后重复细胞学+HPV联合检查（即年度复查）。具体流程描述为：“细胞学（-）& HPV（+） → 则应进行1年复查（1年后重复联合检测）”。这旨在监测HPV感染状态，避免过度干预，因为细胞学阴性表明当前无明显细胞异常。  答案： 应进行1年后重复细胞学+高危HPV联合检测（年度复查）。 | B | B | B |
| Non-RAG strategy | HPV阳性且细胞学阴性：  下一步检查：  - 12个月后联合复查（HPV检测+细胞学）。   *依据：2019 ASCCP共识指南指出，此类患者发生CIN3+风险较低（<1%），推荐12个月随访而非立即阴道镜（证据等级：B级）。* | A | A | A |
| **Question 17: 在宫颈癌检测中，如果细胞学和高危HPV联合检测显示HPV阳性且细胞学结果为阴性，HPV分型为HPV16/18阳性，应该进行什么具体检查？** | | | | |
| Context Enrichment | 在宫颈癌检测中，如果细胞学和高危HPV联合检测显示HPV阳性且细胞学结果为阴性，HPV分型为HPV16/18阳性，应该进行什么具体检查？  根据文档中的图3（细胞学+高危型HPV联合检测结果异常的处理流程）：   - 当细胞学结果为阴性（-）且HPV检测为阳性（+），且HPV分型检测显示HPV16/18阳性时，处理流程为：立即转诊阴道镜检查。   文档明确指出（图3第5点下的细分）：在细胞学 ≥ ASC-US & HPV（+）的进一步分诊中，"若HPV分型检测阳性：HPV16/18阳性 → 立即转诊阴道镜"。虽然此点针对细胞学 ≥ ASC-US，但文档中细胞学阴性（-）& HPV（+）的情况在分型后也适用相同原则（图3整体逻辑）。   因此，具体检查是：立即转诊进行阴道镜检查。 | A | A | A |
| Contextual Chunk Headers | HPV阳性、细胞学阴性且HPV16/18阳性时的处理  具体检查：立即转诊阴道镜检查（文档片段1，块编号1；文档片段2，块编号59）。   *依据：HPV16/18阳性患者直接进入阴道镜路径，无需等待其他分流检查。* | A | A | A |
| Context Compression | 在宫颈癌检测中，如果细胞学和高危HPV联合检测显示HPV阳性且细胞学结果为阴性，HPV分型为HPV16/18阳性，应该进行什么具体检查？  基于文档片段1、3和7：   - 文档明确指出，当HPV分型为HPV16/18阳性且细胞学阴性时，应立即转诊进行阴道镜检查（片段1： "HPV16/18阳性→立即转诊阴道镜检查"；片段3： "HPV16/18阳性 → 立即转诊阴道镜"；片段7： "HPV分型时HPV16、18阳性，立即转诊阴道镜"）。  - 无需其他前置检查，阴道镜检查是直接且必要的步骤。   综上，具体检查为：立即转诊阴道镜检查。 | A | A | A |
| CRAG | HPV16/18阳性+细胞学阴性的处理  知识库依据（图3流程 & 文本说明）：  无论细胞学结果如何，HPV16/18阳性均需立即转诊阴道镜：   - 图3流程：细胞学(-) & HPV(+) 且分型为HPV16/18(+) → 立即转诊阴道镜  - 文本佐证："HPV16、18阳性，立即转诊阴道镜"（2.3.3节）   > 结论：无需额外检查，直接转诊阴道镜。 | A | A | A |
| Document Augmentation | 在宫颈癌检测中，如果细胞学和高危HPV联合检测显示HPV阳性且细胞学结果为阴性，HPV分型为HPV16/18阳性，应该进行什么具体检查？  根据文档片段2和3，细胞学（-）& HPV（+）且HPV分型为HPV16/18阳性时，应立即转诊阴道镜检查（文档片段2：分支5；文档片段3：HPV16/18阳性立即转诊阴道镜）。 | A | A | A |
| Fusion RAG | 在宫颈癌检测中，如果细胞学和高危HPV联合检测显示HPV阳性且细胞学结果为阴性，HPV分型为HPV16/18阳性，应该进行什么具体检查？  根据上下文信息：  - 文档1（图1）说明：“HPV16/18阳性→立即转诊阴道镜检查”。  - 文档2（2.3.3节）指出：“HPV分型时HPV16、18阳性，立即转诊阴道镜”。  - 文档3（图3部分）也提到：“HPV16/18（+）→立即转诊阴道镜”。   因此，具体检查应为：立即转诊阴道镜检查。 | A | A | A |
| HyDE | HPV16/18阳性且细胞学阴性时的具体检查  答案：   立即转诊阴道镜检查（上下文信息第1段，2.3.3条款；第3段图1流程；第4段2.1节）。 | A | A | A |
| Query Transformation | 在宫颈癌检测中，如果细胞学和高危HPV联合检测显示HPV阳性且细胞学结果为阴性，HPV分型为HPV16/18阳性，应该进行什么具体检查？  基于文档内容，当HPV阳性、细胞学阴性且HPV分型为HPV16/18阳性时，应立即转诊进行阴道镜检查。文档片段1（分支5：“HPV16/18阳性 → 立即转诊阴道镜”）、文档片段2（图1：“HPV16/18阳性→立即转诊阴道镜检查”）和文档片段3（“HPV16、18阳性，立即转诊阴道镜”）均明确支持此处理。因此，具体检查是阴道镜检查，以评估宫颈病变并排除高级别病变或癌变。 | A | A | A |
| SelfRAG | 在宫颈癌检测中，如果细胞学和高危HPV联合检测显示HPV阳性且细胞学结果为阴性，HPV分型为HPV16/18阳性，应该进行什么具体检查？  根据文档中的图3（细胞学+高危型HPV联合检测结果异常的处理流程），HPV分型的影响仅在细胞学异常（≥ASC-US）时被考虑：   - 处理流程分支4：细胞学（-）& HPV（+） → 应进行1年后重复联合检测（无论HPV分型结果）。  - 处理流程分支5：细胞学 ≥ ASC-US & HPV（+） → 才根据HPV分型细分：HPV16/18阳性需立即转诊阴道镜。   文档中，对于细胞学阴性（-）且HPV阳性（+）的情况，没有提到HPV分型（如HPV16/18阳性）会改变处理流程；分支4统一要求1年复查。例如："4. 细胞学（-）& HPV（+） 则应进行1年复查（1年后重复联合检测）"。   因此，具体检查是：1年后重复细胞学和高危型HPV联合检测。文档未指示HPV16/18阳性时需额外检查或立即转诊阴道镜。 | A | A | A |
| Semantic Chunking | 在宫颈癌检测中，如果细胞学和高危HPV联合检测显示HPV阳性且细胞学结果为阴性，HPV分型为HPV16/18阳性，应该进行什么具体检查？  根据上下文信息（文档片段1、文档片段2）：  - HPV16/18阳性且细胞学阴性时，应立即转诊阴道镜检查。   例如：   - 文档片段1的“HPV分型路径”部分明确指出：“HPV16/18阳性→立即转诊阴道镜检查”。   - 文档片段2也强调：“HPV分型时HPV16、18阳性，立即转诊阴道镜”。  因此，具体检查是阴道镜检查（colposcopy），以评估宫颈病变情况。 | A | A | A |
| NaiveRAG | 在宫颈癌检测中，如果细胞学和高危HPV联合检测显示HPV阳性且细胞学结果为阴性，HPV分型为HPV16/18阳性，应该进行什么具体检查？  根据文档内容（特别是相似度0.620和0.623的片段）：   - HPV分型为HPV16/18阳性且细胞学阴性时，必须立即转诊阴道镜检查。   具体检查：直接进行阴道镜检查，无需其他前置检查。   文档依据：相似度0.620片段中的“HPV分型时HPV16、18阳性，立即转诊阴道镜”和相似度0.623片段中的图3描述“HPV16/18阳性 → 立即转诊阴道镜”。 | A | A | A |
| Rerank | 在宫颈癌检测中，如果细胞学和高危HPV联合检测显示HPV阳性且细胞学结果为阴性，HPV分型为HPV16/18阳性，应该进行什么具体检查？  如果HPV分型为HPV16/18阳性，应立即转诊进行阴道镜检查。   - 依据：文档片段2（相关性: 0.9854）描述："若HPV分型检测阳性：HPV16/18阳性 → 立即转诊阴道镜"。文档片段4（相关性: 0.9653）也强调："HPV阳性 /细胞学阴性 → 若HPV分型时HPV16、18阳性，立即转诊阴道镜"。  - 具体步骤：无需等待复查，直接安排阴道镜检查以评估宫颈病变，因为HPV16/18型与高度病变风险相关。 | A | A | A |
| RSE | 在宫颈癌检测中，如果细胞学和高危HPV联合检测显示HPV阳性且细胞学结果为阴性，HPV分型为HPV16/18阳性，应该进行什么具体检查？  基于上下文信息（相关片段1中的图3：细胞学+高危型HPV联合检测结果异常的处理流程），当细胞学结果为阴性（-）、高危HPV检测为阳性（+），且HPV分型显示HPV16/18阳性时，应立即转诊阴道镜检查。具体流程描述为：在HPV分型路径下，“HPV16/18阳性 → 立即转诊阴道镜检查”。这是因为HPV16/18是高危型别，与宫颈癌风险高度相关，即使细胞学阴性也需直接评估。  答案： 应立即转诊阴道镜检查。 | A | A | A |
| Non-RAG strategy | HPV16/18阳性且细胞学阴性：  下一步检查：  - 直接转诊阴道镜检查。   * HPV16/18阳性者无论细胞学结果如何，均需阴道镜评估（因CIN3+风险显著升高，约10-20%）。* | A | A | A |
| **Question 18: 在宫颈癌检测中，如果患者的细胞学和高危HPV联合检测显示HPV阳性，细胞学结果为阴性，且没有HPV16或HPV18分型，是否需要其他检查？** | | | | |
| Context Enrichment | 在宫颈癌检测中，如果患者的细胞学和高危HPV联合检测显示HPV阳性，细胞学结果为阴性，且没有HPV16或HPV18分型，是否需要其他检查？  根据文档中的图3（细胞学+高危型HPV联合检测结果异常的处理流程）：   - 当细胞学结果为阴性（-）且HPV检测为阳性（+），且HPV分型检测显示HPV16/18阴性但其他12型高危HPV阳性时，处理流程为：建议1年后重复细胞学+HPV联合检查（即1年复查），无需立即进行其他检查。   文档明确指出（图3第5点下的细分）："HPV16/18阴性但其他12型高危HPV阳性 → 1年复查"。   因此，不需要其他立即检查，只需定期随访（1年后重复联合检测）。 | A | A | A |
| Contextual Chunk Headers | HPV阳性、细胞学阴性且无HPV16/18分型时的处理  是否需要其他检查：是，需结合以下步骤：  - 必须进行细胞学检查（文档片段1，块编号1）。  - 若未分型HPV阳性，应结合临床症状和体征，必要时直接转诊阴道镜检查（文档片段2，块编号59）。   *依据：未分型检测无法区分高危亚型，需通过细胞学或临床评估进一步分流。* | A | A | A |
| Context Compression | 在宫颈癌检测中，如果患者的细胞学和高危HPV联合检测显示HPV阳性，细胞学结果为阴性，且没有HPV16或HPV18分型（即HPV分型检测显示其他12型高危HPV阳性），是否需要其他检查？  基于文档片段1和3：   - 当HPV分型检测显示没有HPV16或18阳性（即其他12型高危HPV阳性）且细胞学阴性时，不需要其他立即检查（如阴道镜）。  - 建议进行1年后重复细胞学和HPV联合检查（年度复查），以监测病情变化（片段1： "HPV16/18阴性或其他12型阳性→...其他12型阳性且细胞学阴性→年度复查"；片段3： "HPV16/18阴性但其他12型高危HPV阳性 → 1年复查"）。  - 文档中没有提到需要额外检查（如影像学或活检）在此场景下；仅强调年度复查。   综上，不需要其他立即检查，只需安排1年后重复细胞学和HPV联合检查（年度复查）。 | A | A | A |
| CRAG | 非HPV16/18型阳性+细胞学阴性的处理  知识库依据（图3流程）：  若HPV分型为 其他12型高危阳性 + 细胞学阴性：  → 仅需1年后重复联合检测（细胞学+HPV），无需阴道镜（图3分支4）。  例外：若未分型检测，则需直接转诊阴道镜（图3分支5）。   > 结论：分型明确为非16/18型时，仅需年度复查，无需其他检查。 | A | A | A |
| Document Augmentation | 在宫颈癌检测中，如果患者的细胞学和高危HPV联合检测显示HPV阳性，细胞学结果为阴性，且没有HPV16或HPV18分型，是否需要其他检查？  根据文档片段2，如果HPV分型检测显示HPV16/18阴性但其他12型高危HPV阳性（即没有HPV16或18分型），则处理方式是1年复查（1年后重复细胞学+HPV联合检测），不需要立即进行其他检查如阴道镜（文档片段2：分支5，HPV16/18阴性但其他12型阳性→1年复查）。因此，不需要其他检查，只需年度复查。 | A | A | A |
| Fusion RAG | 在宫颈癌检测中，如果患者的细胞学和高危HPV联合检测显示HPV阳性，细胞学结果为阴性，且没有HPV16或HPV18分型，是否需要其他检查？  根据上下文信息：  - “没有HPV16或HPV18分型”可能指两种情况：HPV分型检测显示其他12型阳性，或未进行分型检测。  - 文档1（图1）说明：如果HPV16/18阴性但其他12型阳性，则“进行宫颈细胞学检查”（但在此场景中细胞学已为阴性，因此需复查）。  - 文档2（2.3.3节）指出：如果HPV未分型检测，则“建议结合临床症状和体征，必要时直接转诊阴道镜检查”。  - 文档3（图3部分）明确：“HPV16/18（-）但其他12型（+）→1年复查”。   因此：  - 如果HPV分型为其他12型阳性，则需要1年后复查细胞学和高危HPV联合检测。  - 如果未进行HPV分型检测，则需要结合临床症状和体征，必要时直接转诊阴道镜检查。   综上，需要其他检查，具体取决于分型状态：复查或必要时阴道镜检查。 | A | A | A |
| HyDE | 无HPV16/18分型时的其他检查需求  答案：   - 若HPV未分型检测阳性：必须直接转诊阴道镜检查（上下文信息第1段，2.3.3条款；第3段图1流程）。   - 若HPV分型检测为其他12型阳性且细胞学阴性：仅需1年后复查（无需阴道镜）（上下文信息第3段图1流程；第2段图4分支5）。 | A | A | A |
| Query Transformation | 在宫颈癌检测中，如果患者的细胞学和高危HPV联合检测显示HPV阳性，细胞学结果为阴性，且没有HPV16或HPV18分型，是否需要其他检查？  基于文档内容，“没有HPV16或HPV18分型”可能指两种情况：HPV已分型为其他12型高危HPV阳性，或HPV未进行分型检测。处理如下：  - 如果HPV已分型为其他12型高危HPV阳性（即非16/18型）：不需要立即进行其他检查，但建议1年后重复细胞学+HPV联合检查（文档片段1的“HPV16/18阴性但其他12型高危HPV阳性 → 1年复查”和文档片段2的“其他12型阳性且细胞学阴性→年度复查”）。 - 如果HPV未进行分型检测（即不分型阳性）：需要其他检查，即建议直接转诊阴道镜检查，或结合临床症状和体征决定（文档片段3的“HPV没有分型检测，建议结合临床症状和体征，必要时直接转诊阴道镜检查”）。  综上，是否需要其他检查取决于分型状态：已分型为其他12型则仅需1年复查；未分型则可能需要阴道镜检查。 | A | A | A |
| SelfRAG | 在宫颈癌检测中，如果患者的细胞学和高危HPV联合检测显示HPV阳性，细胞学结果为阴性，且没有HPV16或HPV18分型，是否需要其他检查？  根据文档中的图3（细胞学+高危型HPV联合检测结果异常的处理流程）：   - 处理流程分支4：细胞学（-）& HPV（+） → 应进行1年后重复联合检测。   文档明确说明，对于细胞学阴性且HPV阳性的情况，无论是否进行HPV分型（包括没有HPV16/18分型），处理方式相同："4. 细胞学（-）& HPV（+） 则应进行1年复查（1年后重复联合检测）"。   没有提到需要其他额外检查（如阴道镜或ECC）。   因此，不需要其他检查；只需1年后重复细胞学和高危型HPV联合检测。 | A | A | A |
| Semantic Chunking | 在宫颈癌检测中，如果患者的细胞学和高危HPV联合检测显示HPV阳性，细胞学结果为阴性，且没有HPV16或HPV18分型，是否需要其他检查？  根据上下文信息（文档片段1、文档片段3）：  - “没有HPV16或HPV18分型”通常指两种情况：   1. 其他12种高危型阳性：不需要其他立即检查；应进行年度复查（即1年后重复细胞学和HPV联合检测）。   例如：   - 文档片段1的“特殊路径”部分：“其他12型阳性且细胞学阴性→年度复查（不需阴道镜）”。   - 文档片段3补充：“若 HPV16/18（-）但其他12型（+）→1年复查”。   2. 未分型检测：如果未进行分型检测（即仅知高危型阳性但未区分具体类型），则需结合临床症状决定是否转诊阴道镜。但上下文建议优先以年度复查为主。   例如：   - 文档片段2提到：“若未进行分型检测...建议结合临床症状和体征”，但文档片段1更明确地指出“未分型HPV阳性患者→必须进行细胞学检查”（但此处细胞学已为阴性），因此核心处理仍是年度复查。  综上，“没有HPV16或HPV18分型”主要指其他12型阳性时，不需要其他立即检查；只需年度复查联合检测。除非有临床症状（如异常出血），否则不推荐直接阴道镜检查。 | A | A | A |
| NaiveRAG | 在宫颈癌检测中，如果患者的细胞学和高危HPV联合检测显示HPV阳性，细胞学结果为阴性，且没有HPV16或HPV18分型，是否需要其他检查？  根据文档内容（特别是相似度0.620和0.623的片段）：   - “没有HPV16或HPV18分型”意味着两种情况：   - HPV分型检测显示其他12型高危HPV阳性：需要其他检查，即1年后重复细胞学+HPV联合检查（年度复查）。   - HPV未分型检测（未进行分型）：需要其他检查，即建议转诊阴道镜检查（基于临床症状和体征）。   是否需要其他检查：是，必须根据分型状态进行：   - 如果分型为其他12型阳性 → 进行1年后重复联合检测。   - 如果未分型 → 进行阴道镜检查。   文档依据：相似度0.620片段中的“HPV阳性 /细胞学阴性：...② HPV没有分型检测，建议...直接转诊阴道镜检查”和相似度0.623片段中的“HPV16/18阴性但其他12型高危HPV阳性 → 1年复查”。 | A | A | A |
| Rerank | 在宫颈癌检测中，如果患者的细胞学和高危HPV联合检测显示HPV阳性，细胞学结果为阴性，且没有HPV16或HPV18分型，是否需要其他检查？  如果HPV分型显示为其他12型高危HPV阳性（即非HPV16/18型），则不需要其他立即检查，只需进行1年后复查（细胞学+HPV联合检测）。   - 依据：文档片段2（相关性: 0.9854）说明："HPV16/18阴性但其他12型高危HPV阳性 → 1年复查"。文档片段4（相关性: 0.9653）的图3部分也显示："HPV16/18阴性 & 其他12型阳性 → 1年复查"。上下文未提及需要额外检查（如阴道镜），除非复查结果异常。  - 具体步骤：仅需1年后重复联合检测；如果复查结果正常（双阴性），则继续常规筛查；如果异常，则进入相应路径。 | A | A | A |
| RSE | 在宫颈癌检测中，如果患者的细胞学和高危HPV联合检测显示HPV阳性，细胞学结果为阴性，且没有HPV16或HPV18分型（即未进行分型检测），是否需要其他检查？  基于上下文信息（相关片段1中的图3：细胞学+高危型HPV联合检测结果异常的处理流程），当细胞学结果为阴性（-）、高危HPV检测为阳性（+），但未进行HPV分型检测（即“HPV未分型”）时，应直接转诊阴道镜检查。具体流程描述为：“若HPV未分型检测阳性：则应直接转诊阴道镜”。这是因为未分型检测无法区分HPV16/18与其他高危型别，需通过阴道镜排除潜在病变。  答案： 是的，需要其他检查，即直接转诊阴道镜检查。 | D | D | D |
| Non-RAG strategy | 非HPV16/18阳性且细胞学阴性：  下一步检查：  - 12个月后联合复查（HPV检测+细胞学）。   * 非16/18型高危HPV阳性且细胞学阴性者，12个月随访是标准管理（CIN3+风险<5%）。* | A | A | A |
| **Question 19: 在宫颈癌筛查中，如果患者组织病理学确认（活检）为LSIL，细胞学发现为LSIL或更低级别，且TZ3分类，应该进行什么随访步骤？** | | | | |
| Context Enrichment | 在宫颈癌筛查中，如果患者组织病理学确认（活检）为LSIL，细胞学发现为LSIL或更高级别，且TZ3分类，应该进行什么随访步骤？  根据文档中的图4（组织病理学确诊LSIL的处理流程）：   - 组织病理学确诊为LSIL（包括CIN I或CIN II/P16阴性）的患者，需根据细胞学结果、年龄、妊娠状态和宫颈转化区类型（TZ）分层处理。  - 对于细胞学发现为LSIL或更高级别（即细胞学 ≥ LSIL），文档将细胞学结果分为两类：   - 如果细胞学 ≤ LSIL（低级别病变）：当TZ3型（转化区不可见）时，患者应进行子宫颈管搔刮术（ECC）检查，并根据组织学诊断级别进行相应的管理。   - 如果细胞学 ≥ ASC-H（提示高级别病变可能）：当TZ3型时，非特殊人群（普通患者）应进行阴道镜检查（文档中："TZ3（转化区不可见）→阴道镜检查"）。   由于问题中指定"细胞学发现为LSIL或更高级别"，这包括LSIL（低级别）和ASC-H/HSIL等（高级别）。文档中细胞学 ≤ LSIL 和 ≥ ASC-H 的处理不同：   - 细胞学 = LSIL（属于 ≤ LSIL）：TZ3 → ECC检查。   - 细胞学 ≥ ASC-H（如ASC-H、HSIL）：TZ3 → 阴道镜检查。   因此，随访步骤取决于细胞学具体级别：   - 如果细胞学结果为LSIL（低级别）：进行子宫颈管搔刮术（ECC）检查，后续根据ECC结果管理。   - 如果细胞学结果为ASC-H或更高级别（高级别）：转诊阴道镜检查。   文档来源：图4描述。 | A | A | A |
| Contextual Chunk Headers | 组织病理学确诊LSIL、细胞学≥LSIL且TZ3分类的随访步骤  随访步骤：  1. 进行宫颈管搔刮术（ECC）检查（文档片段3，块编号2；文档片段8，块编号61）。  2. 根据ECC的组织学诊断级别进行相应管理：  - 若ECC结果异常（如≥CINⅡ），按高级别病变处理（如转诊阴道镜或诊断性宫颈切除术）。  - 若ECC阴性，建议继续观察随访（文档片段8，块编号61）。   *依据：TZ3型（转化区不可见）需ECC评估颈管内病变风险。* | A | A | A |
| Context Compression | 在宫颈癌筛查中，如果患者组织病理学确认（活检）为LSIL，细胞学发现为LSIL或更高级别，且TZ3分类，应该进行什么随访步骤？  基于文档片段2和3：   - 文档片段2指出，对于组织病理学确诊的LSIL，如果任何检查（包括细胞学）异常，应行阴道镜检查（片段2： "LSIL建议12月重复细胞学和HPV联合检查...任何一项检查异常行阴道镜检查"）。  - 细胞学发现为LSIL或更高级别属于异常结果，因此应直接转诊阴道镜检查。  - 文档片段3提到TZ3分类的处理，但仅针对细胞学≤LSIL（低级别病变）的场景（片段3： "若患者为TZ3型，则患者应进行子宫颈管搔刮术(ECC)检查"），而本问题细胞学为LSIL或更高级别（即可能高于低级别），因此不直接适用ECC建议。  - 文档中没有明确指定TZ3分类在细胞学异常时的额外步骤（如ECC），但阴道镜检查是核心步骤。可能根据阴道镜结果决定是否需要ECC或其他处理。   综上，随访步骤为：立即行阴道镜检查。知识库中未找到针对此组合（LSIL病理、细胞学LSIL或更高级别、TZ3）的详细ECC或复查频率说明，但阴道镜检查是必需的。 | A | A | A |
| CRAG | 组织病理学确诊LSIL + 细胞学≥ASC-H + TZ3型的随访  知识库依据（图4流程）：   - 细胞学≥ASC-H + TZ3型（转化区不可见）：   → 必须行子宫颈管搔刮术(ECC)，并根据ECC结果分级管理（图4左侧路径）。  - 若ECC提示高级别病变 → 按HSIL流程处理（图5）。   > 结论：ECC是必需步骤，不可省略随访。 | A | A | A |
| Document Augmentation | 在宫颈癌筛查中，如果患者组织病理学确认（活检）为LSIL，细胞学发现为LSIL或更高级别，且TZ3分类，应该进行什么随访步骤？  根据文档片段2和8，组织病理学确诊LSIL且细胞学≥ASC-H（即LSIL或更高级别）时，对于TZ3型（转化区不可见），患者应进行子宫颈管搔刮术（ECC）检查，并根据组织学诊断级别进行相应的管理（文档片段2：TZ3型应进行ECC；文档片段8：类似流程）。因此，具体步骤是：ECC检查，然后根据ECC结果按组织学级别管理（可能包括阴道镜或进一步治疗）。 | A | B | A |
| Fusion RAG | 在宫颈癌筛查中，如果患者组织病理学确认（活检）为LSIL，细胞学发现为LSIL或更高级别，且TZ3分类，应该进行什么随访步骤？  根据上下文信息：  - 文档3（图4）描述组织病理学确诊LSIL的处理流程：“对于组织病理学确诊为LSIL的患者，根据细胞学结果、年龄、妊娠状态和宫颈转化区类型（TZ）分层处理”。   - 如果细胞学≤LSIL（低级别病变），且TZ3型（转化区不可见），则“患者应进行子宫颈管搔刮术(ECC)检查，并根据组织学诊断级别进行相应的管理”。   - 如果细胞学≥ASC-H（提示高级别病变可能），且TZ3型，则“非特殊人群（普通患者）→阴道镜检查”。  - 文档9（4.1.1节）和文档17（图5部分）也支持此流程，强调TZ3型需ECC或阴道镜检查。   因此，具体随访步骤为：  - 如果细胞学结果为LSIL或更低级别（≤LSIL），则进行子宫颈管搔刮术(ECC)检查。  - 如果细胞学结果为ASC-H或更高级别（≥ASC-H），则进行阴道镜检查。  （注：问题中“细胞学发现为LSIL或更高级别”需区分具体级别以确定步骤。） | A | A | A |
| HyDE | 组织病理学确诊LSIL + 细胞学≥LSIL + TZ3分类的随访步骤  答案：   患者需进行子宫颈管搔刮术（ECC）检查，并根据ECC的组织学诊断级别进行管理（上下文信息第2段图4流程；第14段4.1.1条款）。 | A | B | A |
| Query Transformation | 在宫颈癌筛查中，如果患者组织病理学确认（活检）为LSIL，细胞学发现为LSIL或更高级别，且TZ3分类，应该进行什么随访步骤？  基于文档内容，组织病理学确诊为LSIL（包括CIN I或CIN II/P16阴性）时，根据细胞学结果和转化区类型（TZ）分层处理。文档片段1（图4）和文档片段7详细描述了此流程：  - 如果细胞学发现为LSIL或更高级别（即≥ASC-H）且TZ3分类（转化区不可见）：应直接进行阴道镜检查（文档片段1：“若细胞学≥ASC-H... TZ3（转化区不可见）→阴道镜检查”）。 - 如果细胞学发现为LSIL或更低级别（即≤LSIL）且TZ3分类：应进行子宫颈管搔刮术（ECC）检查，并根据组织学诊断级别进行相应管理（文档片段1：“若患者为TZ3型，则患者应进行子宫颈管搔刮术(ECC)检查，并根据组织学诊断级别进行相应的管理”）。  在您的场景中，细胞学为LSIL或更高级别（≥LSIL），且TZ3分类，因此随访步骤是：直接转诊阴道镜检查（因为≥ASC-H对应高级别病变可能）。 | A | A | A |
| SelfRAG | 在宫颈癌筛查中，如果患者组织病理学确认（活检）为LSIL，细胞学发现为LSIL或更高级别，且TZ3分类，应该进行什么随访步骤？  根据文档中的图4（组织病理学确诊LSIL的处理流程），处理取决于细胞学结果级别：   - 如果细胞学 ≤ LSIL（低级别病变）且TZ3分类：应进行子宫颈管搔刮术（ECC）检查，并根据组织学诊断级别进行相应管理。文档描述："若患者为TZ3型，则患者应进行子宫颈管搔刮术(ECC)检查，并根据组织学诊断级别进行相应的管理。"  - 如果细胞学 ≥ ASC-H（高级别病变可能，包括ASC-H、LSIL或更高级别）且TZ3分类：应转诊阴道镜检查。文档描述："2. 若细胞学≥ASC-H（提示高级别病变可能）... o 非特殊人群（普通患者）： →按转化区类型（TZ）处理： § TZ3（转化区不可见）→阴道镜检查。"   由于问题中指定"细胞学发现为LSIL或更高级别"，这包括两种可能：   - 当细胞学为LSIL（属于≤LSIL）时：随访步骤是进行ECC检查。   - 当细胞学为ASC-H或更高级别（如HSIL）时：随访步骤是转诊阴道镜检查。   文档中未提供"LSIL或更高级别"的统一处理；必须根据具体细胞学级别区分。因此，具体随访步骤取决于细胞学结果：   - 如果细胞学是LSIL（≤LSIL），则进行ECC检查。   - 如果细胞学是ASC-H或更高（≥ASC-H），则进行阴道镜检查。 | A | B | A |
| Semantic Chunking | 在宫颈癌筛查中，如果患者组织病理学确认（活检）为LSIL，细胞学发现为LSIL或更高级别，且TZ3分类，应该进行什么随访步骤？  根据上下文信息（文档片段10）：  - LSIL（低度鳞状上皮内病变）包括CINⅠ或CINⅡ/P16阴性。  - “细胞学发现为LSIL或更高级别”对应“若细胞学≥ASC-H”（即ASC-H、HSIL等异常）。  - TZ3分类指转化区不可见。   处理流程为：   1. 应进行子宫颈管搔刮术(ECC)检查。   2. ECC后根据组织学诊断级别进行相应管理。  例如：   - 文档片段10的图4描述：“若患者为TZ3型,则患者应进行子宫颈管搔刮术(ECC)检查,并根据组织学诊断级别进行相应的管理”。  因此，随访步骤是立即行ECC检查；后续管理取决于ECC结果（如无异常则继续观察）。 | A | A | A |
| NaiveRAG | 在宫颈癌筛查中，如果患者组织病理学确认（活检）为LSIL，细胞学发现为LSIL或更高级别，且TZ3分类，应该进行什么随访步骤？  根据文档内容（特别是相似度0.411和0.371的片段）：   - 组织病理学确诊LSIL后，处理取决于细胞学结果级别：   - 如果细胞学结果为LSIL（低级别）或更低（≤LSIL）：TZ3分类（转化区不可见）时，应进行子宫颈管搔刮术(ECC)检查，并根据ECC结果进行后续管理（如组织学诊断级别）。   - 如果细胞学结果为ASC-H或更高级别（≥ASC-H）：TZ3分类时，应转诊阴道镜检查或直接进行诊断性宫颈切除术（文档中针对高级别细胞学异常的处理）。   随访步骤总结：   1. 评估细胞学具体级别：   - 细胞学≤LSIL → 进行ECC检查。   - 细胞学≥ASC-H → 转诊阴道镜检查或诊断性宫颈切除术。  2. 后续管理基于ECC或活检结果（如无浸润癌则继续随访）。   文档依据：相似度0.411片段中的“组织病理学确诊LSIL...若细胞学≤LSIL...若患者为TZ3型，则患者应进行子宫颈管搔刮术(ECC)检查”和“若细胞学≥ASC-H...TZ3 → 阴道镜检查”；相似度0.371片段补充了诊断性宫颈切除术的选项。 | A | A | A |
| Rerank | 在宫颈癌筛查中，如果患者组织病理学确认（活检）为LSIL，细胞学发现为LSIL或更高级别，且TZ3分类，应该进行什么随访步骤？  如果组织病理学确诊为LSIL（低级别鳞状上皮内病变），细胞学结果为LSIL或更高级别（如ASC-H、HSIL），且转化区类型为TZ3（不可见），则应进行阴道镜检查。   - 依据：文档片段8（相关性: 0.9691）和文档片段18（相关性: 0.6808）描述的组织病理学确诊LSIL处理流程："若细胞学≥ASC-H（提示高级别病变可能） → TZ3（转化区不可见）→ 阴道镜检查"。文档片段13（相关性: 0.8141）也提到类似内容："细胞学≥ASC-H → TZ3 → 阴道镜检查"。  - 具体步骤：立即转诊阴道镜检查，以排除浸润癌或高级别病变；如果阴道镜检查发现异常，则进行活检或进一步处理。 | A | A | A |
| RSE | 在宫颈癌筛查中，如果患者组织病理学确认（活检）为LSIL，细胞学发现为LSIL或更高级别，且TZ3分类，应该进行什么随访步骤？  基于上下文信息（相关片段1中的图4：组织病理学确诊LSIL的处理流程），当组织病理学确诊为LSIL（包括CINⅠ或CINⅡ/P16阴性），且细胞学结果为≥ASC-H（即LSIL或更高级别，如ASC-H、HSIL），同时宫颈转化区类型为TZ3（转化区不可见）时，应进行阴道镜检查。具体流程描述为：“若细胞学≥ASC-H（提示高级别病变可能） o 非特殊人群（普通患者）： →按转化区类型（TZ）处理： § TZ3（转化区不可见）→阴道镜检查。”这适用于普通患者（非21-24岁或妊娠期），旨在评估潜在高级别病变。  答案： 应进行阴道镜检查。 | A | A | A |
| Non-RAG strategy | 在宫颈癌筛查中，如果患者组织病理学确认（活检）为LSIL，细胞学发现为LSIL或更高级别，且TZ3分类，应该进行什么随访步骤？  随访步骤：  - 首选阴道镜检查。   *依据：CSCCP专家共识解读指出，TZ3（转化区不可见）且细胞学≥LSIL时，活检LSIL可能存在高级别病变漏诊，推荐切除治疗（ⅡB类证据）。 | A | A | A |
| **Question 20: 在宫颈癌筛查中，如果患者组织病理学确认（活检）为LSIL，细胞学发现为LSIL或更低级别，且TZ1/2分类，应该进行什么随访步骤？** | | | | |
| Context Enrichment | 在宫颈癌筛查中，如果患者组织病理学确认（活检）为LSIL，细胞学发现为LSIL或更低级别，且TZ1/2分类，应该进行什么随访步骤？  根据文档中的图4（组织病理学确诊LSIL的处理流程）：   - 组织病理学确诊为LSIL的患者，当细胞学 ≤ LSIL（低级别病变）且TZ分型为TZ1型或2型（转化区部分或完全可见）时，处理流程为：进入观察随访路径。   具体随访步骤包括：   - 每6~12周复查（密切监测，排除浸润癌）。   - 若连续两次复查阴性，则转为常规筛查。   文档明确指出："若患者TZ分型为TZ1型或2型：则应进入观察随访路径：每6~12周复查（密切监测，排除浸润癌）。若连续两次复查阴性→转常规筛查。"   因此，随访步骤是：每6~12周进行复查（包括细胞学和/或HPV检测），连续两次阴性后转为常规筛查。 | A | A | A |
| Contextual Chunk Headers | 组织病理学确诊LSIL、细胞学≤LSIL且TZ1/2分类的随访步骤  随访步骤：  1. 进入观察随访路径，每6-12个月复查（包括细胞学+阴道镜），密切监测排除浸润癌（文档片段3，块编号2；文档片段8，块编号61）。  2. 若连续两次复查阴性，则转为常规筛查（如3年1次联合检测）（文档片段3，块编号2）。   *依据：TZ1/2型（转化区可见）病变自然消退率高，首选保守监测。*   说明：以上回答均严格基于文档内容，未添加外部知识。所有流程引用自《宫颈癌筛查与处理指南》相关章节（文档片段1、2、3、8）。 | A | A | A |
| Context Compression | 在宫颈癌筛查中，如果患者组织病理学确认（活检）为LSIL，细胞学发现为LSIL或更低级别，且TZ1/2分类，应该进行什么随访步骤？  基于文档片段3：   - 文档片段3明确描述了组织病理学确诊LSIL且细胞学≤LSIL（低级别病变）时的处理：如果TZ分型为TZ1或TZ2型，患者应进入观察随访路径，每6~12周进行复查（片段3： "细胞学≤LSIL（低级别病变）若患者TZ分型为TZ1型或2型：则应进入观察随访路径：每6~12周复查"）。  - 复查内容通常包括细胞学检查（或可能结合HPV检测），但文档未指定具体检查项目；仅提及复查频率。  - 文档片段2的一般LSIL处理（12月重复联合检查）可能适用，但本场景有具体分层（TZ1/2和细胞学≤LSIL），因此优先使用片段3的指导。   综上，随访步骤为：进入观察随访路径，每6~12周进行一次复查（如细胞学检查），以监测病情变化。 | A | A | A |
| CRAG | 组织病理学确诊LSIL + 细胞学≤LSIL + TZ1/2型的随访  知识库依据（图4流程 & 文本说明）：   - 处理原则：   → 观察随访：每6~12周复查细胞学+阴道镜（图4右侧路径）。   → 若连续两次复查阴性 → 转为常规筛查。  - 依据：LSIL（含CINⅠ/CINⅡ p16阴性）60%可自然消退，无需治疗（4.1.1节）。   > 结论：密切观察（6~12周/次），无需手术干预。 | A | A | A |
| Document Augmentation | 在宫颈癌筛查中，如果患者组织病理学确认（活检）为LSIL，细胞学发现为LSIL或更低级别，且TZ1/2分类，应该进行什么随访步骤？  根据文档片段2和8，组织病理学确诊LSIL且细胞学≤LSIL（即LSIL或更低级别）时，对于TZ1或TZ2型（转化区可见或部分可见），患者应进入观察随访路径：每6~12周复查（密切监测，排除浸润癌）；若连续两次复查阴性，则转为常规筛查（文档片段2：TZ1/2型→观察随访；文档片段8：类似描述）。因此，具体步骤是：每6~12周复查细胞学和/或阴道镜，连续两次阴性后转常规筛查。  所有回答均基于提供的文档内容。如果细节不足，建议结合临床实践和最新指南进行个体化处理。 | A | A | A |
| Fusion RAG | 在宫颈癌筛查中，如果患者组织病理学确认（活检）为LSIL，细胞学发现为LSIL或更低级别，且TZ1/2分类，应该进行什么随访步骤？  根据上下文信息：  - 文档3（图4）明确说明：对于组织病理学确诊LSIL，如果细胞学≤LSIL（低级别病变），且TZ1/2型（转化区部分或完全可见），则“应进入观察随访路径：每6~12周复查（密切监测，排除浸润癌）。若连续两次复查阴性→转常规筛查”。  - 文档9（4.1.1节）补充：“LSIL建议12月重复细胞学和HPV联合检查，两次检查均阴性，转为常规筛查；任何一项检查异常行阴道镜检查”。   因此，具体随访步骤为：进入观察随访路径，每6~12周复查（包括细胞学和/或阴道镜检查，密切监测排除浸润癌）。若连续两次复查结果阴性，则转为常规筛查。 | A | A | A |
| HyDE | 组织病理学确诊LSIL + 细胞学≤LSIL + TZ1/2分类的随访步骤  答案：   进入观察随访路径：   - 每6~12周复查（细胞学+阴道镜，密切监测排除浸润癌）；   - 若连续两次复查阴性，则转为常规筛查（上下文信息第2段图4流程；第14段4.1.1条款）。 | A | A | A |
| Query Transformation | 在宫颈癌筛查中，如果患者组织病理学确认（活检）为LSIL，细胞学发现为LSIL或更低级别，且TZ1/2分类，应该进行什么随访步骤？  基于文档内容，组织病理学确诊为LSIL时，细胞学发现为LSIL或更低级别（即≤LSIL）且TZ1/2分类（转化区部分或完全可见），应进入观察随访路径。文档片段1（图4）和文档片段7明确说明：  - “细胞学≤LSIL（低级别病变） 若患者TZ分型为TZ1型或2型：则应进入观察随访路径：每6~12周复查（密切监测，排除浸润癌）。若连续两次复查阴性→转常规筛查。”  因此，随访步骤是：每6~12周进行一次复查（包括细胞学和/或阴道镜检查，以密切监测并排除浸润癌）。如果连续两次复查结果均为阴性，则转为常规筛查周期。 | A | A | A |
| SelfRAG | 在宫颈癌筛查中，如果患者组织病理学确认（活检）为LSIL，细胞学发现为LSIL或更低级别，且TZ1/2分类，应该进行什么随访步骤？  根据文档中的图4（组织病理学确诊LSIL的处理流程）：   - 处理流程1：细胞学 ≤ LSIL（低级别病变）且TZ1或TZ2分类 → 应进入观察随访路径：每6~12周复查（密切监测，排除浸润癌）；若连续两次复查阴性，则转为常规筛查。文档描述："若患者TZ分型为TZ1型或2型：则应进入观察随访路径： § 每6~12周复查（密切监测，排除浸润癌）。 § 若连续两次复查阴性→转常规筛查。"   问题中指定"细胞学发现为LSIL或更低级别"（即≤LSIL），且TZ1/2分类，这直接匹配上述流程。   因此，随访步骤是：每6~12周进行复查（包括细胞学和阴道镜检查以监测排除浸润癌），如果连续两次复查结果阴性，则转为常规筛查。 | A | B | A |
| Semantic Chunking | 在宫颈癌筛查中，如果患者组织病理学确认（活检）为LSIL，细胞学发现为LSIL或更低级别，且TZ1/2分类，应该进行什么随访步骤？  根据上下文信息（文档片段10）：  - LSIL包括CINⅠ或CINⅡ/P16阴性。  - “细胞学发现为LSIL或更低级别”对应“若患者TZ分型为TZ1型或2型”且“细胞学≤LSIL”（即包括LSIL、ASC-US或阴性）。   处理流程为：   1. 进入观察随访路径：每6~12周复查一次（包括重复细胞学和/或阴道镜检查），以密切监测并排除浸润癌。   2. 若连续两次复查结果均为阴性（无异常），则转为常规筛查。  例如：   - 文档片段10明确说明：“若患者TZ分型为TZ1型或2型：则应进入观察随访路径：每6~12周复查...若连续两次复查阴性→转常规筛查”。  因此，随访步骤是定期每6~12周复查；目标是连续两次阴性后过渡到常规筛查周期。 | A | A | A |
| NaiveRAG | 在宫颈癌筛查中，如果患者组织病理学确认（活检）为LSIL，细胞学发现为LSIL或更低级别，且TZ1/2分类，应该进行什么随访步骤？  根据文档内容（特别是相似度0.411的片段）：   - 组织病理学确诊LSIL，细胞学结果为LSIL或更低级别（≤LSIL），且TZ1/2分类（转化区完全或部分可见）时，应进入观察随访路径。   随访步骤：  - 每6~12周进行一次复查（包括细胞学检查和阴道镜检查），以密切监测并排除浸润癌。  - 若连续两次复查结果阴性（无异常），则转为常规筛查（如每3-5年一次联合检测）。   文档依据：相似度0.411片段中的“组织病理学确诊LSIL...细胞学≤LSIL（低级别病变）若患者TZ分型为TZ1型或2型：则应进入观察随访路径：每6~12周复查（密切监测，排除浸润癌）。若连续两次复查阴性→转常规筛查”。 | A | A | A |
| Rerank | 在宫颈癌筛查中，如果患者组织病理学确认（活检）为LSIL，细胞学发现为LSIL或更低级别，且TZ1/2分类，应该进行什么随访步骤？  如果组织病理学确诊为LSIL，细胞学结果为LSIL或更低级别（如阴性或ASC-US），且转化区类型为TZ1/2（完全或部分可见），则应进入观察随访路径：每6~12周复查一次（细胞学和HPV检测），若连续两次复查阴性，则转为常规筛查。   - 依据：文档片段8（相关性: 0.9691）明确："若细胞学≤LSIL（低级别病变） → 若患者TZ分型为TZ1型或2型：则应进入观察随访路径：每6~12周复查（密切监测，排除浸润癌）。若连续两次复查阴性→转常规筛查"。文档片段18（相关性: 0.6808）也重复此流程。  - 具体步骤：   - 每6~12周进行一次复查，包括细胞学检查和高危HPV检测。   - 如果连续两次复查结果均为阴性（细胞学阴性和HPV阴性），则转为常规筛查（如每3年一次）。   - 如果复查出现异常（如细胞学≥ASC-US或HPV阳性），则转诊阴道镜检查。 | A | A | A |
| RSE | 在宫颈癌筛查中，如果患者组织病理学确认（活检）为LSIL，细胞学发现为LSIL或更低级别，且TZ1/2分类，应该进行什么随访步骤？  基于上下文信息（相关片段1中的图4：组织病理学确诊LSIL的处理流程），当组织病理学确诊为LSIL（包括CINⅠ或CINⅡ/P16阴性），且细胞学结果为≤LSIL（即LSIL或更低级别，如阴性或ASC-US），同时宫颈转化区类型为TZ1/2（转化区部分或完全可见）时，应进入观察随访路径。具体流程描述为：“若患者TZ分型为TZ1型或2型：则应进入观察随访路径： § 每6~12周复查（密切监测，排除浸润癌）。 § 若连续两次复查阴性→转常规筛查。”这因为TZ1/2型转化区可见，病变多为低风险，可通过密切监测避免过度治疗。  答案： 应每6~12周进行复查（密切监测，排除浸润癌），若连续两次复查结果阴性，则转为常规筛查。 | A | A | A |
| Non-RAG strategy | 活检确诊LSIL，且细胞学≤LSIL、TZ1/2分类：  随访步骤：  - 6个月后联合复查（HPV检测+细胞学）：   - 若复查阴性 → 转入常规筛查；   - 若任一阳性 → 转诊阴道镜。   * TZ1/2（转化区可见）且细胞学低风险者可行保守随访（ⅡA类证据）。* | A | A | A |
| **Question 21: 在宫颈癌筛查中，如果患者组织病理学确认（活检）为LSIL，细胞学发现为ASC-H或更高级别，应该进行什么随访步骤？** | | | | |
| Context Enrichment | 在宫颈癌筛查中，如果患者组织病理学确认（活检）为LSIL，细胞学发现为ASC-H或更高级别，应该进行什么随访步骤？  根据文档中的图4处理流程（组织病理学确诊LSIL），对于细胞学≥ASC-H（提示高级别病变可能）的非特殊人群（普通患者），应按照宫颈转化区类型（TZ）分层处理：  - 如果TZ3（转化区不可见）：进行阴道镜检查。 - 如果TZ1/2（转化区部分或完全可见）：进行诊断性宫颈切除术±颈管搔刮术（ECC）。  此流程基于文档中的描述："非特殊人群（普通患者）： →按转化区类型（TZ）处理： TZ3（转化区不可见）→阴道镜检查。 TZ1/2（转化区部分/完全可见）→诊断性宫颈切除术±颈管搔刮术（ECC）。" 由于问题中未指定TZ类型，处理需根据阴道镜检查确定的TZ结果进行。 | B | A | A |
| Contextual Chunk Headers | 在宫颈癌筛查中，如果患者组织病理学确认（活检）为LSIL，细胞学发现为ASC-H或更高级别，应该进行什么随访步骤？  根据文档片段1（块编号2，块主题：宫颈癌筛查处理流程）和文档片段4（块编号61，块主题：LSIL与HSIL管理原则），组织病理学确诊LSIL（包括CINⅠ或CINⅡ/P16阴性）且细胞学≥ASC-H（提示高级别病变可能）时，处理取决于患者的转化区类型（TZ）：  - 非特殊人群（普通患者）：   - 如果TZ类型为TZ3（转化区不可见），应进行阴道镜检查（文档片段1）。   - 如果TZ类型为TZ1/2（转化区部分/完全可见），应进行诊断性宫颈切除术±颈管搔刮术（ECC）（文档片段1）。  文档片段4也支持此流程，强调根据TZ类型分层处理。  回答：对于普通患者，应首先评估转化区类型（TZ）：  - TZ3：转诊阴道镜检查。  - TZ1/2：进行诊断性宫颈切除术±颈管搔刮术（ECC）。  （依据：文档片段1和4） | A | A | A |
| Context Compression | 在宫颈癌筛查中，如果患者组织病理学确认（活检）为LSIL，细胞学发现为ASC-H或更高级别，应该进行什么随访步骤？  基于文档片段1（相关性: 1.000），对于组织病理学确诊LSIL且细胞学≥ASC-H的非特殊人群（普通患者），随访步骤取决于宫颈转化区类型（TZ）：   - 如果TZ3（转化区不可见），应进行阴道镜检查。  - 如果TZ1/2（转化区部分或完全可见），应进行诊断性宫颈切除术±颈管搔刮术（ECC）。   文档片段4（相关性: 0.800）和文档片段5（相关性: 0.800）也支持细胞学异常（如ASC-H）应转诊阴道镜的原则，但具体处理需结合TZ类型。因此，对于普通患者，必须根据TZ类型决定后续步骤：TZ3时阴道镜检查，TZ1/2时诊断性宫颈切除术±ECC。   回答： 随访步骤取决于转化区类型（TZ）：如果TZ3，进行阴道镜检查；如果TZ1/2，进行诊断性宫颈切除术±颈管搔刮术（ECC）。知识库中未提供TZ未指定时的默认处理，因此TZ类型是必需的评估因素。 | A | A | A |
| CRAG | 普通患者（非特殊人群）组织病理学LSIL + 细胞学≥ASC-H  处理流程：   - TZ1/2型（转化区可见）：每6~12周复查（密切监测，排除浸润癌）。若连续两次复查阴性则转常规筛查。   - TZ3型（转化区不可见）：需行子宫颈管搔刮术（ECC），根据组织学结果进一步管理（如确诊高级别病变则按相应流程处理）。  - 依据：知识库文档图4（组织病理学确诊LSIL处理流程）。 | A | B | A |
| Document Augmentation | 在宫颈癌筛查中，如果患者组织病理学确认（活检）为LSIL，细胞学发现为ASC-H或更高级别，应该进行什么随访步骤？  根据文档片段1和片段5，组织病理学确诊为LSIL（包括CIN I或CIN II/P16阴性）的患者，如果细胞学结果为≥ASC-H（提示高级别病变可能），处理流程如下：   - 对于非特殊人群（普通患者）：   - 根据转化区类型（TZ）处理：   - 如果TZ3型（转化区不可见），则进行阴道镜检查。   - 如果TZ1/2型（转化区部分或完全可见），则进行诊断性宫颈切除术±颈管搔刮术（ECC）。  - 对于特殊人群（如21-24岁或妊娠期患者），有额外分层（见后续问题）。   因此，普通患者应根据TZ类型选择阴道镜检查或诊断性宫颈切除术。 | A | A | A |
| Fusion RAG | 在宫颈癌筛查中，如果患者组织病理学确认（活检）为LSIL，细胞学发现为ASC-H或更高级别，应该进行什么随访步骤？  基于上下文（文档1和文档4），对于普通患者（非21-24岁、非妊娠期），组织病理学确诊LSIL且细胞学≥ASC-H时，随访步骤取决于宫颈转化区类型（TZ）：  - 如果TZ类型为TZ3（转化区不可见），应进行阴道镜检查（文档1：非特殊人群，TZ3→阴道镜检查）。  - 如果TZ类型为TZ1或TZ2（转化区完全或部分可见），应进行诊断性宫颈切除术±颈管搔刮术（ECC）（文档1：非特殊人群，TZ1/2→诊断性宫颈切除术±ECC）。  由于问题中未指定TZ类型，上下文未提供默认处理；因此，实际随访需根据TZ评估结果决定。如果TZ未知，应优先进行阴道镜检查以确定TZ类型（文档1和文档4均强调TZ是分层依据）。  总结回答：随访步骤需基于转化区类型（TZ）：若TZ3，进行阴道镜检查；若TZ1/2，进行诊断性宫颈切除术±ECC。TZ类型必须通过临床评估确定。 | A | A | A |
| HyDE | 在宫颈癌筛查中，如果患者组织病理学确认（活检）为LSIL，细胞学发现为ASC-H或更高级别，应该进行什么随访步骤？  回答：根据文档上下文（特别是[HyDE相似度: 0.641]片段），对于组织病理学确诊为LSIL（包括CINI或CINII/P16阴性）的患者，如果细胞学结果为ASC-H或更高级别（如HSIL等），且患者属于非特殊人群（即非21-24岁、非妊娠期），应按照宫颈转化区类型（TZ）分层处理：  - 如果转化区类型为TZ3（转化区不可见），则患者应进行阴道镜检查。  - 如果转化区类型为TZ1/2（转化区部分或完全可见），则患者应进行诊断性宫颈切除术±颈管搔刮术（ECC）。 - 依据：文档中明确说明：“2. 若细胞学≥ASC-H（提示高级别病变可能） o 非特殊人群（普通患者）： →按转化区类型（TZ）处理： § TZ3（转化区不可见）→阴道镜检查。 § TZ1/2（转化区部分/完全可见）→诊断性宫颈切除术±颈管搔刮术（ECC）。” | A | A | A |
| Query Transformation | 在宫颈癌筛查中，如果患者组织病理学确认（活检）为LSIL，细胞学发现为ASC-H或更高级别，应该进行什么随访步骤？  回答：   根据文档片段4（相似度: 0.500），对于组织病理学确诊为LSIL且细胞学≥ASC-H的患者（非特殊人群，即普通患者），应按照转化区类型（TZ）进行处理：   - 如果转化区类型为TZ3（转化区不可见），应转诊进行阴道镜检查。   - 如果转化区类型为TZ1/2（转化区部分或完全可见），应进行诊断性宫颈切除术±颈管搔刮术（ECC）。   由于问题中未指定转化区类型（TZ），初始步骤应为转诊阴道镜检查以确定TZ类型，然后根据TZ结果决定后续处理（阴道镜检查或诊断性宫颈切除术±ECC）。   来源：文档片段4（“对于组织病理学确诊为LSIL...若细胞学≥ASC-H...非特殊人群（普通患者）： →按转化区类型（TZ）处理： § TZ3（转化区不可见）→阴道镜检查。 § TZ1/2（转化区部分/完全可见）→诊断性宫颈切除术±颈管搔刮术（ECC）。”）。 | B | A | A |
| SelfRAG | 在宫颈癌筛查中，如果患者组织病理学确认（活检）为LSIL，细胞学发现为ASC-H或更高级别，应该进行什么随访步骤？  根据文档（第一个片段中的图4描述），对于组织病理学确诊为LSIL且细胞学≥ASC-H（提示高级别病变可能）的患者，处理流程取决于宫颈转化区类型（TZ）：  - 如果转化区类型为TZ1或TZ2（转化区部分或完全可见）：患者应进行诊断性宫颈切除术±颈管搔刮术（ECC）。 - 如果转化区类型为TZ3（转化区不可见）：患者应进行阴道镜检查。 - 文档强调，这是针对非特殊人群（普通患者）的处理方式。如果后续检查发现浸润癌，则转宫颈癌治疗流程。  因此，随访步骤为：根据TZ类型决定具体操作（TZ1/2 → 诊断性宫颈切除术±ECC；TZ3 → 阴道镜检查）。 | A | A | A |
| Semantic Chunking | 在宫颈癌筛查中，如果患者组织病理学确认（活检）为LSIL，细胞学发现为ASC-H或更高级别，应该进行什么随访步骤？  回答：  根据上下文信息（文档片段1），对于组织病理学确诊为LSIL且细胞学≥ASC-H的普通患者（非21-24岁、非妊娠期），应根据宫颈转化区类型（TZ）分层处理：  - 如果转化区类型为TZ3型（转化区不可见），则应进行阴道镜检查。  - 如果转化区类型为TZ1或TZ2型（转化区部分或完全可见），则应进行诊断性宫颈切除术±颈管搔刮术（ECC）。  依据： 文档片段1明确说明：“对于组织病理学确诊为LSIL的患者...若细胞学≥ASC-H...非特殊人群（普通患者）：→按转化区类型（TZ）处理：TZ3→阴道镜检查；TZ1/2→诊断性宫颈切除术±颈管搔刮术（ECC）。” | B | A | A |
| NaiveRAG | 在宫颈癌筛查中，如果患者组织病理学确认（活检）为LSIL，细胞学发现为ASC-H或更高级别，应该进行什么随访步骤？  回答: 根据文档上下文（相似度0.502和0.407），对于组织病理学确诊为LSIL且细胞学结果为ASC-H或更高级别（≥ASC-H）的患者（假设为非特殊人群，即普通患者，年龄非21-24岁且非妊娠），处理流程依赖于宫颈转化区类型（TZ），这需要通过阴道镜检查来确定。具体步骤如下：  - 首先，应进行阴道镜检查以评估TZ类型。  - 如果阴道镜检查显示TZ3（转化区不可见），则转诊阴道镜检查（可能包括进一步评估或活检）。  - 如果阴道镜检查显示TZ1/2（转化区部分或完全可见），则进行诊断性宫颈切除术±颈管搔刮术（ECC）。  - 文档来源: "图4：组织病理学确诊LSIL的处理流程...若细胞学≥ASC-H（提示高级别病变可能） o 非特殊人群（普通患者）： →按转化区类型（TZ）处理： § TZ3（转化区不可见）→阴道镜检查。 § TZ1/2（转化区部分/完全可见）→诊断性宫颈切除术±颈管搔刮术（ECC）。"（相似度0.502） | A | A | A |
| Rerank | 在宫颈癌筛查中，如果患者组织病理学确认（活检）为LSIL，细胞学发现为ASC-H或更高级别，应该进行什么随访步骤？  回答：   根据上下文信息（文档片段1和文档片段4），对于组织病理学确诊为LSIL且细胞学≥ASC-H（提示高级别病变可能）的普通患者（非21-24岁或妊娠期），随访步骤取决于宫颈转化区类型（TZ）：   - 如果阴道镜检查结果为TZ3型（转化区不可见），则应立即转诊进行阴道镜检查（以进一步评估病变）。   - 如果阴道镜检查结果为TZ1/2型（转化区部分或完全可见），则应立即进行诊断性宫颈切除术±颈管搔刮术（ECC）。   - 依据：文档片段1明确说明“若细胞学 ≥ ASC-US & HPV(+) 则应进行进一步分诊”，但针对细胞学≥ASC-H的具体流程在文档片段1的“图4：组织病理学确诊LSIL的处理流程”中详细描述（相关性0.9868）。文档片段4（相关性0.9749）也支持此流程，强调分层处理基于TZ类型。 | A | A | A |
| RSE | 在宫颈癌筛查中，如果患者组织病理学确认（活检）为LSIL，细胞学发现为ASC-H或更高级别，应该进行什么随访步骤？  基于上下文（图4：组织病理学确诊LSIL的处理流程），对于组织病理学确诊为LSIL且细胞学≥ASC-H的非特殊人群（即普通患者，未指定年龄或妊娠状态），随访步骤取决于宫颈转化区类型（TZ）：   - 如果TZ类型为TZ3（转化区不可见），则进行阴道镜检查。  - 如果TZ类型为TZ1/2（转化区部分或完全可见），则进行诊断性宫颈切除术±颈管搔刮术（ECC）。   由于问题中未指定TZ类型，处理必须根据TZ结果确定。上下文未提供默认或通用步骤，因此TZ类型是必要评估因素。 | B | A | A |
| Non-RAG strategy | 在宫颈癌筛查中，如果患者组织病理学确认（活检）为LSIL，细胞学发现为ASC-H或更高级别，应该进行什么随访步骤？  推荐随访步骤：   - 如果细胞学为ASC-H：CIN 3+风险约为7-10%，推荐进行阴道镜检查（如果尚未完成）或每6个月进行一次细胞学随访。如果阴道镜检查发现可疑病变，可考虑活检。   - 如果细胞学为HSIL或更高级别：CIN 3+风险升高至15-20%，推荐直接进行诊断性切除手术（如LEEP或冷刀锥切），以避免遗漏高度病变。 | A | A | A |
| **Question 22: 在宫颈癌筛查中，如果21至24岁患者组织病理学确认（活检）为LSIL，细胞学发现为ASC-H或更高级别，应该进行什么随访步骤？** | | | | |
| Context Enrichment | 在宫颈癌筛查中，如果21至24岁患者组织病理学确认（活检）为LSIL，细胞学发现为ASC-H或更高级别，应该进行什么随访步骤？  根据文档中的图4处理流程，对于21~24岁患者的特殊人群，细胞学≥ASC-H时，应首先进行阴道镜检查，然后根据阴道镜结果处理：  - 初始步骤：进行阴道镜检查。 - 后续处理：  - 如果阴道镜检查结果为TZ3型，则进行诊断性宫颈切除术。  - 如果阴道镜检查结果为TZ1或TZ2型，则患者应每6~12周进行复查（密切监测，排除浸润癌），若连续两次复查阴性，则转为常规筛查。  此流程基于文档中的描述："对于若细胞学≥ASC-H的特殊人群： 21~24岁患者则应只进行阴道镜检查。若阴道镜检查结果为TZ3型，则应进行诊断性宫颈切除术。若阴道镜检查结果为 TZ1或TZ2型，则患者应每6~12周进行复查（密切监测，排除浸润癌）。若连续两次复查阴性则应转常规筛查。" | A | A | A |
| Contextual Chunk Headers | 在宫颈癌筛查中，如果21至24岁患者组织病理学确认（活检）为LSIL，细胞学发现为ASC-H或更高级别，应该进行什么随访步骤？  根据文档片段1（块编号2，块主题：宫颈癌筛查处理流程），针对21-24岁特殊人群，当细胞学≥ASC-H时，处理流程如下：   - 患者应只进行阴道镜检查（不直接进行手术）。  - 阴道镜检查后，根据结果进一步处理：   - 如果阴道镜结果为TZ3型，应进行诊断性宫颈切除术。   - 如果阴道镜结果为TZ1或TZ2型，患者应每6~12周进行复查（密切监测，排除浸润癌）；若连续两次复查阴性，则转为常规筛查。  文档片段2（块编号3，块主题：HSIL处理原则）也提到21-24岁患者的观察策略，但本问题聚焦于LSIL且细胞学≥ASC-H的场景，文档片段1提供直接依据。  回答：对于21-24岁患者，应直接进行阴道镜检查：  - 阴道镜检查后，根据TZ类型：   - TZ3：进行诊断性宫颈切除术。   - TZ1/TZ2：每6~12周复查（细胞学和阴道镜），若连续两次阴性，转常规筛查。  （依据：文档片段1） | A | A | A |
| Context Compression | 在宫颈癌筛查中，如果21至24岁患者组织病理学确认（活检）为LSIL，细胞学发现为ASC-H或更高级别，应该进行什么随访步骤？  基于文档片段1（相关性: 1.000），对于21~24岁患者（特殊人群）组织病理学确诊LSIL且细胞学≥ASC-H，应首先进行阴道镜检查。文档片段3a和3b（相关性: 0.800）进一步细化：阴道镜检查后，根据TZ类型决定后续：   - 如果TZ1/2，可进行观察（每10-12周复查细胞学或阴道镜）。  - 如果TZ3，应直接行诊断性/治疗性宫颈切除术。   因此，对于21至24岁患者，初始步骤是阴道镜检查，然后根据TZ结果选择观察或手术。   回答： 应进行阴道镜检查。之后：如果阴道镜检查显示TZ1/2类型，进行观察（每10-12周复查）；如果显示TZ3类型，进行诊断性/治疗性宫颈切除术。 | B | B | B |
| CRAG | 总体管理原则  处理流程：可选择观察随访，每10~12周复查细胞学+阴道镜。  - 依据：知识库文档特殊人群管理部分（21-24岁患者可保守观察）。  # | B | B | B |
| Document Augmentation | 在宫颈癌筛查中，如果21至24岁患者组织病理学确认（活检）为LSIL，细胞学发现为ASC-H或更高级别，应该进行什么随访步骤？  根据文档片段1和片段2，对于21-24岁患者，组织病理学确诊为LSIL且细胞学≥ASC-H时：   - 应进行阴道镜检查（文档片段1提到“对于若细胞学≥ASC-H的特殊人群：21~24岁患者则应只进行阴道镜检查”）。  - 如果阴道镜检查结果为TZ3型，则进行诊断性宫颈切除术；如果为TZ1/2型，则可进行观察（每10-12周复查）。   因此，21-24岁患者首先进行阴道镜检查，然后根据TZ类型进一步处理。 | B | B | B |
| Fusion RAG | 在宫颈癌筛查中，如果21至24岁患者组织病理学确认（活检）为LSIL，细胞学发现为ASC-H或更高级别，应该进行什么随访步骤？  基于上下文（文档1），对于21-24岁患者（特殊人群），组织病理学确诊LSIL且细胞学≥ASC-H时，应首先进行阴道镜检查（文档1："21~24岁患者则应只进行阴道镜检查"）。然后，根据阴道镜检查结果中的TZ类型决定后续步骤：  - 如果阴道镜检查结果为TZ3，应进行诊断性宫颈切除术（文档1："若阴道镜检查结果为TZ3型，则应进行诊断性宫颈切除术"）。  - 如果阴道镜检查结果为TZ1或TZ2，应每6~12周进行复查（密切监测，排除浸润癌）；若连续两次复查阴性，则转为常规筛查（文档1："若阴道镜检查结果为TZ1或TZ2型，则患者应每6~12周进行复查（密切监测，排除浸润癌）。若连续两次复查阴性则应转常规筛查"）。  总结回答：应首先进行阴道镜检查；然后基于TZ类型：若TZ3，进行诊断性宫颈切除术；若TZ1/2，每6~12周复查（密切监测），连续两次阴性后转常规筛查。 | B | B | B |
| HyDE | 在宫颈癌筛查中，如果21至24岁患者组织病理学确认（活检）为LSIL，细胞学发现为ASC-H或更高级别，应该进行什么随访步骤？  回答：根据文档上下文（特别是[HyDE相似度: 0.641]片段），对于21-24岁患者，组织病理学确诊为LSIL且细胞学结果为ASC-H或更高级别时，应首先进行阴道镜检查。然后根据阴道镜检查结果进一步处理：  - 如果阴道镜检查结果为TZ3型，则患者应进行诊断性宫颈切除术。  - 如果阴道镜检查结果为TZ1/2型，则患者应进行观察（随访）。 - 依据：文档中明确说明：“o 对于若细胞学≥ASC-H的特殊人群： § 21~24岁患者则应只进行阴道镜检查。若阴道镜检查结果为TZ3型，则应进行诊断性宫颈切除术。若阴道镜检查结果为TZ1/2型，则进行观察。” | A | A | A |
| Query Transformation | 在宫颈癌筛查中，如果21至24岁患者组织病理学确认（活检）为LSIL，细胞学发现为ASC-H或更高级别，应该进行什么随访步骤？  回答：   根据文档片段4（相似度: 0.500），对于21~24岁患者（属于特殊人群），当组织病理学确诊为LSIL且细胞学≥ASC-H时，应直接进行阴道镜检查。   来源：文档片段4（“对于若细胞学≥ASC-H的特殊人群： § 21~24岁患者则应只进行阴道镜检查。”）。 | A | A | A |
| SelfRAG | 在宫颈癌筛查中，如果21至24岁患者组织病理学确认（活检）为LSIL，细胞学发现为ASC-H或更高级别，应该进行什么随访步骤？  根据文档（第一个片段中的特殊人群处理部分），对于21-24岁患者且细胞学≥ASC-H的情况：  - 患者应首先进行阴道镜检查。 - 然后，根据阴道镜检查结果中的转化区类型（TZ）决定后续步骤：  - 如果TZ类型为TZ1或TZ2：患者可进行观察随访，每10-12周复查细胞学和阴道镜（第二个片段中的描述）。  - 如果TZ类型为TZ3：患者应直接进行诊断性/治疗性宫颈切除术（第一个片段和第二个片段均支持此点）。  因此，随访步骤为：先进行阴道镜检查，然后根据TZ类型选择观察（TZ1/2）或宫颈切除术（TZ3）。 | A | A | A |
| Semantic Chunking | 在宫颈癌筛查中，如果21至24岁患者组织病理学确认（活检）为LSIL，细胞学发现为ASC-H或更高级别，应该进行什么随访步骤？  回答：  根据上下文信息（文档片段1），对于21至24岁患者组织病理学确诊为LSIL且细胞学≥ASC-H时，应首先进行阴道镜检查。后续步骤取决于阴道镜检查结果：  - 如果阴道镜检查结果为TZ3型（转化区不可见），则应进行诊断性宫颈切除术。  - 如果阴道镜检查结果为TZ1或TZ2型（转化区部分或完全可见），则应每6~12周复查细胞学和阴道镜；若连续两次复查阴性（无异常发现），则转为常规筛查。  依据： 文档片段1明确说明：“21~24岁患者...若细胞学≥ASC-H...则应只进行阴道镜检查。若阴道镜检查结果为TZ3型...应进行诊断性宫颈切除术；若阴道镜检查结果为TZ1或TZ2型...应每6~12周进行复查...若连续两次复查阴性则应转常规筛查。” | B | A | A |
| NaiveRAG | 在宫颈癌筛查中，如果21至24岁患者组织病理学确认（活检）为LSIL，细胞学发现为ASC-H或更高级别，应该进行什么随访步骤？  回答: 根据文档上下文（相似度0.502和0.474），对于21-24岁患者（属于特殊人群），组织病理学确诊为LSIL且细胞学结果为ASC-H或更高级别（≥ASC-H）时，处理流程以阴道镜检查为首要步骤，后续根据TZ类型决定：  - 首先，应进行阴道镜检查以评估TZ类型。  - 如果阴道镜检查显示TZ3（转化区不可见），则直接行诊断性/治疗性宫颈切除术。  - 如果阴道镜检查显示TZ1/2（转化区部分或完全可见），则可进行观察随访，每10-12周复查细胞学+阴道镜，密切监测病变进展。  - 文档来源: "对于若细胞学≥ASC-H的特殊人群： § 21~24岁患者则应只进行阴道镜检查。若阴道镜检查结果为TZ3型，则应进行诊断性宫颈切除术。若阴道镜检查结果为..."（相似度0.502）和 "a.若患者为21-24岁患者，且宫颈转化区类型为TZ1/2型，则患者可进行观察（每10-12周复查）... b.若患者为21-24岁患者，且宫颈转化区类型为TZ3型，则患者应直接行诊断性/治疗性宫颈切除术..."（相似度0.474）。 | B | B | B |
| Rerank | 在宫颈癌筛查中，如果21至24岁患者组织病理学确认（活检）为LSIL，细胞学发现为ASC-H或更高级别，应该进行什么随访步骤？  回答：   根据上下文信息（文档片段1、文档片段4和文档片段10），对于21-24岁患者组织病理学确诊为LSIL且细胞学≥ASC-H，随访步骤是进行观察性随访：   - 每10-12周复查一次细胞学检查和阴道镜检查（密切监测，排除浸润癌）。   - 若连续两次复查阴性，则转为常规筛查；若复查异常（如病变进展或发现浸润癌），则转诊进行诊断性/治疗性宫颈切除术。   - 依据：文档片段1（相关性0.9868）指出“21~24岁患者则应只进行阴道镜检查”，文档片段4（相关性0.9749）和文档片段10（相关性0.9183）进一步细化，21-24岁患者可选择观察路径，每10-12周复查细胞学和阴道镜。 | B | B | B |
| RSE | 在宫颈癌筛查中，如果21至24岁患者组织病理学确认（活检）为LSIL，细胞学发现为ASC-H或更高级别，应该进行什么随访步骤？  基于上下文（图4：组织病理学确诊LSIL的处理流程），对于21至24岁患者（属于特殊人群），组织病理学确诊为LSIL且细胞学≥ASC-H，应遵循以下随访步骤：   - 首先，只进行阴道镜检查。  - 根据阴道镜检查结果：   - 如果结果为TZ3型，则进行诊断性宫颈切除术。   - 如果结果为TZ1或TZ2型，则每6~12周复查（密切监测，排除浸润癌）；如果连续两次复查阴性，则转为常规筛查。   此流程直接来自上下文对21~24岁特殊人群的描述。 | A | A | A |
| Non-RAG strategy | 在宫颈癌筛查中，如果21至24岁患者组织病理学确认（活检）为LSIL，细胞学发现为ASC-H或更高级别，应该进行什么随访步骤？  针对21至24岁年轻患者，活检确认为LSIL且细胞学为ASC-H或更高级别，推荐优先进行阴道镜检查。但由于该年龄段宫颈癌风险较低，管理应更保守：如果阴道镜检查满意且无高度病变证据(如结果为TZ1或TZ2型)，可采取观察随访（如6个月后重复细胞学联合HPV检测），避免立即诊断性切除，以减少过度治疗风险。如果阴道镜检查不满意或怀疑高度病变((如结果为TZ1或TZ2型)，则考虑诊断性切除术。 | A | A | A |
| **Question 23: 在宫颈癌筛查中，如果21至24岁患者组织病理学确认（活检）为LSIL，细胞学发现为ASC-H或更高级别，且阴道镜检查为TZ3分类，应该进行什么随访步骤？** | | | | |
| Context Enrichment | 在宫颈癌筛查中，如果21至24岁患者组织病理学确认（活检）为LSIL，细胞学发现为ASC-H或更高级别，且阴道镜检查为TZ3分类，应该进行什么随访步骤？  根据文档中的图4处理流程，对于21~24岁患者，细胞学≥ASC-H，且阴道镜检查为TZ3型（转化区不可见），应直接进行诊断性宫颈切除术。  此步骤基于文档中的明确描述："若阴道镜检查结果为TZ3型，则应进行诊断性宫颈切除术。" 无需额外复查，直接手术干预以排除高级别病变或浸润癌。 | A | A | A |
| Contextual Chunk Headers | 在宫颈癌筛查中，如果21至24岁患者组织病理学确认（活检）为LSIL，细胞学发现为ASC-H或更高级别，且阴道镜检查为TZ3分类，应该进行什么随访步骤？  基于文档片段1（块编号2，块主题：宫颈癌筛查处理流程），针对21-24岁患者，当细胞学≥ASC-H且阴道镜检查结果为TZ3型时，处理明确：  - 应进行诊断性宫颈切除术（后续根据术后病理结果管理，如切缘阴性则4-6月后复查）。  文档片段2（块编号3）在HSIL处理中提及类似原则，但本问题针对LSIL，文档片段1提供最直接依据。  回答：对于21-24岁患者，阴道镜检查为TZ3型时，应进行诊断性宫颈切除术。术后根据病理结果管理（如切缘阴性则4-6月后复查细胞学+阴道镜+ECC）。  （依据：文档片段1） | B | A | A |
| Context Compression | 在宫颈癌筛查中，如果21至24岁患者组织病理学确认（活检）为LSIL，细胞学发现为ASC-H或更高级别，且阴道镜检查为TZ3分类，应该进行什么随访步骤？  基于文档片段1和文档片段3，对于21至24岁患者，组织病理学确诊LSIL且细胞学≥ASC-H，且阴道镜检查为TZ3分类（转化区不可见），应直接进行诊断性/治疗性宫颈切除术。  （来源：文档片段1 [压缩后, 相关性: 1.000] 和 文档片段3 [压缩后, 相关性: 0.800]） | A | A | A |
| CRAG | TZ3型（转化区不可见）  处理流程：直接行诊断性/治疗性宫颈切除术（不可选择消融治疗）。  - 依据：知识库文档明确TZ3型需手术干预（特殊人群管理部分）。 | A | A | A |
| Document Augmentation | 在宫颈癌筛查中，如果21至24岁患者组织病理学确认（活检）为LSIL，细胞学发现为ASC-H或更高级别，且阴道镜检查为TZ3分类，应该进行什么随访步骤？  根据文档片段2，对于21-24岁患者，如果阴道镜检查为TZ3型（转化区不可见）：   - 应直接行诊断性/治疗性宫颈切除术（文档片段2提到“若患者为21-24岁患者，且宫颈转化区类型为TZ3型，则患者应直接行诊断性/治疗性宫颈切除术”）。   因此，这种情况下应进行诊断性宫颈切除术。 | A | A | A |
| Fusion RAG | 在宫颈癌筛查中，如果21至24岁患者组织病理学确认（活检）为LSIL，细胞学发现为ASC-H或更高级别，且阴道镜检查为TZ3分类，应该进行什么随访步骤？  基于上下文（文档1），对于21-24岁患者，组织病理学确诊LSIL、细胞学≥ASC-H，且阴道镜检查为TZ3（转化区不可见）时，应直接进行诊断性宫颈切除术（文档1："若阴道镜检查结果为TZ3型，则应进行诊断性宫颈切除术"）。文档未提及其他步骤，因此这是标准处理。  总结回答：应进行诊断性宫颈切除术。 | B | A | A |
| HyDE | 在宫颈癌筛查中，如果21至24岁患者组织病理学确认（活检）为LSIL，细胞学发现为ASC-H或更高级别，且阴道镜检查为TZ3分类，应该进行什么随访步骤？  回答：根据文档上下文（特别是[HyDE相似度: 0.641]片段），对于21-24岁患者，组织病理学确诊为LSIL、细胞学结果为ASC-H或更高级别，且阴道镜检查为TZ3型（转化区不可见）时，患者应直接进行诊断性宫颈切除术。 - 依据：文档中明确说明：“若阴道镜检查结果为TZ3型，则应进行诊断性宫颈切除术。”这直接适用于该场景。 | A | A | A |
| Query Transformation | 在宫颈癌筛查中，如果21至24岁患者组织病理学确认（活检）为LSIL，细胞学发现为ASC-H或更高级别，且阴道镜检查为TZ3分类，应该进行什么随访步骤？  回答：   根据文档片段4（相似度: 0.500），对于21~24岁患者，当阴道镜检查结果为TZ3型（转化区不可见）时，应进行诊断性宫颈切除术。   来源：文档片段4（“若阴道镜检查结果为TZ3型，则应进行诊断性宫颈切除术。”）。 | B | A | A |
| SelfRAG | 在宫颈癌筛查中，如果21至24岁患者组织病理学确认（活检）为LSIL，细胞学发现为ASC-H或更高级别，且阴道镜检查为TZ3分类，应该进行什么随访步骤？  根据文档（第一个片段和第二个片段），对于21-24岁患者、细胞学≥ASC-H且阴道镜检查为TZ3分类的情况：  - 患者应直接进行诊断性/治疗性宫颈切除术（无需额外检查）。 - 文档明确指出（第二个片段b点）："若患者为21-24岁患者，且宫颈转化区类型为TZ3型，则患者应直接行诊断性/治疗性宫颈切除术"。 - 后续流程如前所述（如发现浸润癌则转治疗流程）。  因此，随访步骤为：直接进行诊断性/治疗性宫颈切除术。 | A | A | A |
| Semantic Chunking | 在宫颈癌筛查中，如果21至24岁患者组织病理学确认（活检）为LSIL，细胞学发现为ASC-H或更高级别，且阴道镜检查为TZ3分类，应该进行什么随访步骤？  回答：  根据上下文信息（文档片段1），在这种情况下（21至24岁患者、组织病理学LSIL、细胞学≥ASC-H、阴道镜TZ3型），应直接进行诊断性宫颈切除术。  依据： 文档片段1明确说明：“21~24岁患者...若细胞学≥ASC-H...若阴道镜检查结果为TZ3型...应进行诊断性宫颈切除术。” | A | B | A |
| NaiveRAG | 在宫颈癌筛查中，如果21至24岁患者组织病理学确认（活检）为LSIL，细胞学发现为ASC-H或更高级别，且阴道镜检查为TZ3分类，应该进行什么随访步骤？  回答: 根据文档上下文（相似度0.502和0.474），对于21-24岁患者，组织病理学确诊为LSIL、细胞学结果为ASC-H或更高级别（≥ASC-H），且阴道镜检查已确认为TZ3（转化区不可见）时，应直接行诊断性/治疗性宫颈切除术，无需额外观察。后续根据病理结果进行管理，如排除浸润癌后转入常规随访。  - 具体步骤: 直接行诊断性/治疗性宫颈切除术。  - 文档来源: "b.若患者为21-24岁患者，且宫颈转化区类型为TZ3型，则患者应直接行诊断性/治疗性宫颈切除术..."（相似度0.474）和 "对于若细胞学≥ASC-H的特殊人群： § 21~24岁患者...若阴道镜检查结果为TZ3型，则应进行诊断性宫颈切除术。"（相似度0.502）。 | B | A | A |
| Rerank | 在宫颈癌筛查中，如果21至24岁患者组织病理学确认（活检）为LSIL，细胞学发现为ASC-H或更高级别，且阴道镜检查为TZ3分类，应该进行什么随访步骤？  回答：   根据上下文信息（文档片段1、文档片段4和文档片段10），对于21-24岁患者组织病理学确诊为LSIL、细胞学≥ASC-H且阴道镜检查为TZ3型（转化区不可见），随访步骤是直接进行诊断性/治疗性宫颈切除术：   - 术后根据病理结果进行管理：如果病理切缘阴性，则4-6个月后复查（细胞学+阴道镜+ECC）；如果病理切缘阳性（CINⅡ及以上），则4-6个月后复查并根据结果处理；如果发现可疑浸润癌，则转宫颈癌治疗流程。   - 依据：文档片段1（相关性0.9868）明确说明“若阴道镜检查结果为TZ3型，则应进行诊断性宫颈切除术”，文档片段10（相关性0.9183）也支持此点，强调TZ3型患者应直接行宫颈切除术，不可选择消融治疗。 | A | A | A |
| RSE | 在宫颈癌筛查中，如果21至24岁患者组织病理学确认（活检）为LSIL，细胞学发现为ASC-H或更高级别，且阴道镜检查为TZ3分类，应该进行什么随访步骤？  基于上下文（图4：组织病理学确诊LSIL的处理流程），对于21至24岁患者，组织病理学确诊为LSIL、细胞学≥ASC-H且阴道镜检查为TZ3分类，应直接进行诊断性宫颈切除术。后续流程如前所述（例如，术后根据病理结果管理，但具体术后步骤需参考其他上下文，如切缘阴性或阳性的处理）。  此信息直接来自上下文对21~24岁患者TZ3型的处理描述。 | A | B | A |
| Non-RAG strategy | 在宫颈癌筛查中，如果21至24岁患者组织病理学确认（活检）为LSIL，细胞学发现为ASC-H或更高级别，且阴道镜检查为TZ3分类，应该进行什么随访步骤？  推荐随访步骤：   - TZ3分类表示转化区不完全可见（阴道镜不充分），CIN 3+风险较高。推荐优先进行诊断性切除手术（如LEEP），以排除隐藏的高度病变。   - 如果患者拒绝手术或存在禁忌症，可每3-6个月进行一次细胞学和阴道镜随访，密切监测病变变化。  - | A | A | A |
| **Question 24: 在宫颈癌筛查中，如果21至24岁患者组织病理学确认（活检）为LSIL，细胞学发现为ASC-H或更高级别，且阴道镜检查为TZ1/2分类，应该进行什么随访步骤？** | | | | |
| Context Enrichment | 在宫颈癌筛查中，如果21至24岁患者组织病理学确认（活检）为LSIL，细胞学发现为ASC-H或更高级别，且阴道镜检查为TZ1/2分类，应该进行什么随访步骤？  根据文档中的图4处理流程，对于21~24岁患者，细胞学≥ASC-H，且阴道镜检查为TZ1/2型（转化区部分或完全可见），应进行密切监测随访：  - 随访步骤：每6~12周进行复查（包括细胞学和阴道镜检查，以密切监测并排除浸润癌）。 - 终点条件：若连续两次复查结果阴性（无异常发现），则转为常规筛查。  此流程基于文档中的描述："若阴道镜检查结果为 TZ1或TZ2型，则患者应每6~12周进行复查（密切监测，排除浸润癌）。若连续两次复查阴性则应转常规筛查。" | A | A | A |
| Contextual Chunk Headers | 在宫颈癌筛查中，如果21至24岁患者组织病理学确认（活检）为LSIL，细胞学发现为ASC-H或更高级别，且阴道镜检查为TZ1/2分类，应该进行什么随访步骤？  根据文档片段1（块编号2，块主题：宫颈癌筛查处理流程），针对21-24岁患者，当细胞学≥ASC-H且阴道镜检查结果为TZ1或TZ2型时，处理如下：  - 患者应每6~12周进行复查（包括细胞学和阴道镜检查），以密切监测，排除浸润癌。  - 若连续两次复查阴性，则转为常规筛查。  文档片段4（块编号61）在LSIL管理中支持观察随访，但本场景文档片段1提供具体步骤。  回答：对于21-24岁患者，阴道镜检查为TZ1/2型时，应每6~12周进行复查（细胞学+阴道镜），密切监测；若连续两次复查阴性，转常规筛查。  （依据：文档片段1） | A | A | A |
| Context Compression | 在宫颈癌筛查中，如果21至24岁患者组织病理学确认（活检）为LSIL，细胞学发现为ASC-H或更高级别，且阴道镜检查为TZ1/2分类，应该进行什么随访步骤？  基于文档片段3a（相关性: 0.800），对于21~24岁患者组织病理学确诊LSIL、细胞学≥ASC-H且阴道镜检查为TZ1/2型（转化区部分或完全可见），应进行观察（每10-12周复查细胞学或阴道镜）。文档片段1（相关性: 1.000）也支持此年龄组的特殊处理，强调阴道镜检查后根据TZ决定，但未直接指定TZ1/2的细节；文档片段3a提供了明确指导。  回答： 应进行观察，每10-12周复查细胞学或阴道镜检查。 | A | A | A |
| CRAG | 21-24岁患者 + TZ1/2型  处理流程：  - 首选观察随访：每10-12周复查细胞学 + 阴道镜（知识库文档）。  - 若进展：病变持续或进展至HSIL/浸润癌时，行诊断性宫颈切除术（知识库图4）。 - 依据：TZ1/2型病变易观察，年轻患者保守管理可行（知识库及网络搜索均支持）。 - 来源：  - 知识库文档（图4）。  - 网络搜索（年轻患者保守管理策略）。 | A | A | A |
| Document Augmentation | 在宫颈癌筛查中，如果21至24岁患者组织病理学确认（活检）为LSIL，细胞学发现为ASC-H或更高级别，且阴道镜检查为TZ1/2分类，应该进行什么随访步骤？  根据文档片段2，对于21-24岁患者，如果阴道镜检查为TZ1/2型（转化区部分或完全可见）：   - 患者可进行观察，每10-12周复查细胞学和阴道镜（文档片段2提到“若患者为21-24岁患者，且宫颈转化区类型为TZ1/2型，则患者可进行观察（每10-12周复查）”）。  - 如果病变无进展，继续观察；如果进展或发现浸润癌，则转治疗流程（诊断性/治疗性宫颈切除术）。   因此，这种情况下应进行每10-12周的观察复查。 | C | C | C |
| Fusion RAG | 在宫颈癌筛查中，如果21至24岁患者组织病理学确认（活检）为LSIL，细胞学发现为ASC-H或更高级别，且阴道镜检查为TZ1/2分类，应该进行什么随访步骤？  基于上下文（文档1），对于21-24岁患者，组织病理学确诊LSIL、细胞学≥ASC-H，且阴道镜检查为TZ1或TZ2（转化区完全或部分可见）时，应进行密切监测：每6~12周复查（包括细胞学和阴道镜评估，以排除浸润癌）；若连续两次复查结果阴性，则转为常规筛查（文档1："若阴道镜检查结果为TZ1或TZ2型，则患者应每6~12周进行复查（密切监测，排除浸润癌）。若连续两次复查阴性则应转常规筛查"）。  总结回答：应每6~12周进行复查（密切监测），连续两次阴性后转常规筛查。 | C | C | C |
| HyDE | 在宫颈癌筛查中，如果21至24岁患者组织病理学确认（活检）为LSIL，细胞学发现为ASC-H或更高级别，且阴道镜检查为TZ1/2分类，应该进行什么随访步骤？  回答：根据文档上下文（特别是[HyDE相似度: 0.641]片段），对于21-24岁患者，组织病理学确诊为LSIL、细胞学结果为ASC-H或更高级别，且阴道镜检查为TZ1/2型（转化区部分或完全可见）时，患者应进行观察（随访），无需立即手术。 - 依据：文档中明确说明：“若阴道镜检查结果为TZ1/2型，则进行观察。”这表示保守随访策略。 | B | B | B |
| Query Transformation | 在宫颈癌筛查中，如果21至24岁患者组织病理学确认（活检）为LSIL，细胞学发现为ASC-H或更高级别，且阴道镜检查为TZ1/2分类，应该进行什么随访步骤？  回答：   根据文档片段5（相似度: 0.476），对于组织病理学确诊为LSIL且细胞学≥ASC-H的患者，当转化区类型为TZ1/2（转化区部分或完全可见）时，应进行观察随访，每10~12周复查细胞学和阴道镜检查，以密切监测并排除浸润癌。   来源：文档片段5（“组织病理学确诊LSIL... 细胞学≥ASC-H ... TZ21/2观察(每10~12周)”）。 | B | B | B |
| SelfRAG | 在宫颈癌筛查中，如果21至24岁患者组织病理学确认（活检）为LSIL，细胞学发现为ASC-H或更高级别，且阴道镜检查为TZ1/2分类，应该进行什么随访步骤？  根据文档（第二个片段a点和c点），对于21-24岁患者、细胞学≥ASC-H且阴道镜检查为TZ1/2分类的情况：  - 患者应进行观察随访，每10-12周复查细胞学和阴道镜。 - 观察期间：  - 若病变持续无进展，可继续观察。  - 若病变进展或发现浸润癌，应行诊断性/治疗性宫颈切除术。 - 文档强调（第二个片段a点）："若患者为21-24岁患者，且宫颈转化区类型为TZ1/2型，则患者可进行观察（每10-12周复查）"。  因此，随访步骤为：观察随访，每10-12周复查细胞学和阴道镜，并根据复查结果决定是否转治疗。 | B | B | B |
| Semantic Chunking | 在宫颈癌筛查中，如果21至24岁患者组织病理学确认（活检）为LSIL，细胞学发现为ASC-H或更高级别，且阴道镜检查为TZ1/2分类，应该进行什么随访步骤？  回答：  根据上下文信息（文档片段1），在这种情况下（21至24岁患者、组织病理学LSIL、细胞学≥ASC-H、阴道镜TZ1/2型），应每6~12周复查细胞学和阴道镜；若连续两次复查阴性（无异常发现），则转为常规筛查。  依据： 文档片段1明确说明：“21~24岁患者...若细胞学≥ASC-H...若阴道镜检查结果为TZ1或TZ2型...应每6~12周进行复查...若连续两次复查阴性则应转常规筛查。” | A | A | A |
| NaiveRAG | 在宫颈癌筛查中，如果21至24岁患者组织病理学确认（活检）为LSIL，细胞学发现为ASC-H或更高级别，且阴道镜检查为TZ1/2分类，应该进行什么随访步骤？  回答: 根据文档，对于21至24岁患者，组织病理学确诊为LSIL、细胞学≥ASC-H，且阴道镜检查为TZ1/2型（转化区部分或完全可见），应进行观察随访，每6-12周复查细胞学和阴道镜。如果复查中病变无进展，可继续观察；如果进展或发现浸润癌，则转诊治疗流程（如诊断性/治疗性宫颈切除术）。 - 注意: 此管理策略针对年轻患者，优先选择保守观察以减少不必要的手术干预。 | A | B | A |
| Rerank | 在宫颈癌筛查中，如果21至24岁患者组织病理学确认（活检）为LSIL，细胞学发现为ASC-H或更高级别，且阴道镜检查为TZ1/2分类，应该进行什么随访步骤？  回答：   根据上下文信息（文档片段1、文档片段4和文档片段10），对于21-24岁患者组织病理学确诊为LSIL、细胞学≥ASC-H且阴道镜检查为TZ1/2型（转化区部分或完全可见），随访步骤是进行观察性随访：   - 每10-12周复查一次细胞学检查和阴道镜检查（密切监测，排除浸润癌）。   - 若持续无进展（如连续两次复查阴性），可继续观察；若病变进展或发现浸润癌，则转诊进行诊断性/治疗性宫颈切除术。   - 依据：文档片段1（相关性0.9868）提到21-24岁患者“只进行阴道镜检查”，但文档片段10（相关性0.9183）更详细地说明TZ1/2型患者可选择观察路径，每10-12周复查细胞学和阴道镜。 | C | C | C |
| RSE | 在宫颈癌筛查中，如果21至24岁患者组织病理学确认（活检）为LSIL，细胞学发现为ASC-H或更高级别，且阴道镜检查为TZ1/2分类，应该进行什么随访步骤？  基于上下文（图4：组织病理学确诊LSIL的处理流程），对于21至24岁患者，组织病理学确诊为LSIL、细胞学≥ASC-H且阴道镜检查为TZ1/2分类，应进行每6~12周复查（密切监测，排除浸润癌）。如果连续两次复查阴性，则转为常规筛查。  此信息直接来自上下文对21~24岁患者TZ1/2型的处理描述。 | A | A | A |
| Non-RAG strategy | 在宫颈癌筛查中，如果21至24岁患者组织病理学确认（活检）为LSIL，细胞学发现为ASC-H或更高级别，且阴道镜检查为TZ1/2分类，应该进行什么随访步骤？  推荐随访步骤：   - TZ1/2分类表示转化区完全可见（阴道镜充分），风险相对较低。推荐每6个月进行一次细胞学随访，结合阴道镜评估。如果随访结果稳定（如细胞学降至ASC-US或更低），可延长至12个月随访；如果进展（如持续ASC-H或更高级别），则考虑诊断性切除。   - 不推荐立即治疗，以符合年轻人群的保守管理原则。 | B | B | B |
| **Question 25: 在宫颈癌筛查中，如果妊娠患者组织病理学确认（活检）为LSIL，细胞学发现为ASC-H或更高级别，应该进行什么随访步骤？** | | | | |
| Context Enrichment | 在宫颈癌筛查中，如果妊娠患者组织病理学确认（活检）为LSIL，细胞学发现为ASC-H或更高级别，应该进行什么随访步骤？  根据文档中的图4处理流程，对于妊娠期患者，细胞学≥ASC-H时，应进行密切观察随访，无需立即手术干预：  - 随访步骤：每10~12周进行复查（包括细胞学和阴道镜检查，以密切监测并排除浸润癌）。 - 产后处理：产后6-8周进行复查。 - 后续处理：  - 若复查出现异常，则按照异常处理流程进行处理。  - 若复查并未发现CIN（宫颈上皮内瘤变），则患者后续转为常规筛查。  此流程基于文档中的描述："妊娠期患者→应进入进行密切观察： • 每10~12周复查（密切监测，排除浸润癌）。产后6-8周进行复查。若复查出现异常，则应该按照异常处理流程进行处理。若复查并未发现CIN，则患者后续应转为常规筛查。"  所有回答均基于提供的文档上下文，特别是图4的处理流程。文档中没有其他相关信息，因此未添加额外内容。 | A | A | A |
| Contextual Chunk Headers | 在宫颈癌筛查中，如果妊娠患者组织病理学确认（活检）为LSIL，细胞学发现为ASC-H或更高级别，应该进行什么随访步骤？  根据文档片段1（块编号2，块主题：宫颈癌筛查处理流程）和文档片段9（块编号4，块主题：妊娠期宫颈癌筛查流程），针对妊娠期患者，当细胞学≥ASC-H时，处理原则是密切观察，避免激进治疗：  - 应每10-12周进行复查，包括细胞学+阴道镜检查，以密切监测，排除浸润癌（文档片段1）。  - 若未发现浸润癌，推迟至产后6-8周复查（细胞学+阴道镜+ECC）；若产后复查无CINⅡ+，转常规筛查；若异常，按流程处理（文档片段9）。  文档片段22（块编号580，块主题：妊娠期宫颈病变诊断与处理）也强调妊娠期以观察为主，60%病变可自然消退。  回答：对于妊娠患者，应进行密切观察：每10-12周复查细胞学+阴道镜检查；若未发现浸润癌，推迟至产后6-8周复查（细胞学+阴道镜+ECC）；产后根据复查结果处理（如无异常转常规筛查）。  （依据：文档片段1和9） | A | A | A |
| Context Compression | 在宫颈癌筛查中，如果妊娠患者组织病理学确认（活检）为LSIL，细胞学发现为ASC-H或更高级别，应该进行什么随访步骤？  基于文档片段3e（相关性: 0.800）、文档片段10（相关性: 0.300）和文档片段15（相关性: 0.200），对于妊娠期患者组织病理学确诊LSIL（相当于CIN I~II）且细胞学≥ASC-H，主要目标是排除浸润癌。若无浸润癌证据，应每10-12周进行细胞学＋阴道镜检查，并推迟侵入性治疗至产后。文档片段7（相关性: 0.700）强调妊娠期一般不主张做治疗性锥切（如宫颈切除术），因为并发症风险高。具体步骤：   - 每10-12周复查细胞学和阴道镜。  - 若未发现浸润癌，推迟至产后6-8周复查（细胞学+阴道镜+ECC）。  - 产后复查无CIN II+则常规筛查；如有CIN II+则进行诊断性/治疗性宫颈切除术。   回答： 应每10-12周进行细胞学＋阴道镜检查以监测病变。若无浸润癌证据，推迟治疗至产后6-8周复查（包括细胞学、阴道镜和ECC）。妊娠期避免诊断性宫颈切除术等侵入性操作。 | A | A | A |
| CRAG | 妊娠期患者组织病理学LSIL + 细胞学≥ASC-H  处理流程：   1. 每10~12周复查细胞学+阴道镜（密切监测，排除浸润癌）。   2. 禁止ECC或宫颈切除术（除非高度怀疑浸润癌）。   3. 产后6-8周复查：若异常则按流程处理；若无CIN则转常规筛查。  - 依据：   - 知识库文档（妊娠期管理以观察为主，产后复查）。   - 网络搜索结果（妊娠期禁用ECC，仅当怀疑浸润癌时活检）。 | A | A | A |
| Document Augmentation | 在宫颈癌筛查中，如果妊娠患者组织病理学确认（活检）为LSIL，细胞学发现为ASC-H或更高级别，应该进行什么随访步骤？  根据文档片段1、片段2和片段4，对于妊娠期患者，组织病理学确诊为LSIL且细胞学≥ASC-H时：   - 应每10-12周进行细胞学＋阴道镜检查（文档片段2提到“对于妊娠期患者，应每10-12周进行细胞学＋阴道镜检查”）。  - 如果未发现浸润癌，则推迟至产后6-8周复查（细胞学+阴道镜+ECC）。  - 如果发现可疑浸润癌，则行诊断性/治疗性宫颈切除术。   因此，妊娠患者应进行每10-12周的密切监测，产后复查，并根据结果处理。  所有回答均基于提供的文档内容。如有不确定或需要更详细临床指导，建议结合具体患者情况和最新指南进行决策。 | A | A | A |
| Fusion RAG | 在宫颈癌筛查中，如果妊娠患者组织病理学确认（活检）为LSIL，细胞学发现为ASC-H或更高级别，应该进行什么随访步骤？  基于上下文（文档1），对于妊娠期患者，组织病理学确诊LSIL且细胞学≥ASC-H时，应进行密切观察：每10~12周复查（包括细胞学和阴道镜检查，以密切监测并排除浸润癌）；产后6-8周进行复查（文档1："妊娠期患者→应进入进行密切观察：每10~12周复查（密切监测，排除浸润癌）。产后6-8周进行复查"）。如果复查发现异常（如进展为CIN或浸润癌），则按异常处理流程处理；如果未发现CIN，则转为常规筛查（文档1："若复查出现异常，则应该按照异常处理流程进行处理。若复查并未发现CIN，则患者后续应转为常规筛查"）。  总结回答：应每10~12周进行复查（密切监测），产后6-8周复查；异常时按流程处理，无异常则转常规筛查。   说明 - 所有回答均严格基于提供的上下文信息，主要引用文档1（融合分数最高，最相关）和文档4作为补充。 - 上下文信息充足，未出现“知识库中无法找到答案”的情况。 - 作为妇科专家，我建议在实际临床中结合患者具体情况（如依从性、医疗资源）和最新指南调整随访计划。 | A | A | A |
| HyDE | 在宫颈癌筛查中，如果妊娠患者组织病理学确认（活检）为LSIL，细胞学发现为ASC-H或更高级别，应该进行什么随访步骤？  回答：在知识库中未找到答案。文档上下文提供了妊娠期患者的一般处理原则（例如，每10-12周进行细胞学＋阴道镜检查），但没有针对组织病理学确诊为LSIL且细胞学为ASC-H或更高级别的具体随访步骤描述。文档中提及妊娠期患者的管理以排除浸润癌为主要目标，并建议定期复查（如[HyDE相似度: 0.695]片段：“e.对于妊娠期患者，应每10-12周进行细胞学＋阴道镜检查”），但未指定ASC-H或更高级别细胞学结果下的特殊流程。因此，基于提供的文档，无法确定确切步骤。 | A | A | A |
| Query Transformation | 在宫颈癌筛查中，如果妊娠患者组织病理学确认（活检）为LSIL，细胞学发现为ASC-H或更高级别，应该进行什么随访步骤？  回答：   根据文档片段1（相似度: 0.546）和文档片段3（相似度: 0.504），对于妊娠期患者，无论组织病理学或细胞学结果如何，都应进行密切观察。具体随访步骤包括每10~12周复查细胞学＋阴道镜检查，以排除浸润癌。产后6-8周需进行复查（细胞学+阴道镜+ECC），如果复查异常，则按异常处理流程进行；如果无异常，则转为常规筛查。   来源：   - 文档片段1（“e.对于妊娠期患者，应每10~12周进行细胞学＋阴道镜检查。若未发现浸润癌，则应推迟至产后6-8周复查（细胞学+阴道镜+ECC）。”）。   - 文档片段3（“妊娠期患者→应进入进行密切观察： • 每10~12周复查（密切监测，排除浸润癌）。产后6-8周进行复查。”）。 | A | A | A |
| SelfRAG | 在宫颈癌筛查中，如果妊娠患者组织病理学确认（活检）为LSIL，细胞学发现为ASC-H或更高级别，应该进行什么随访步骤？  根据文档（第二个片段e点），对于妊娠期患者且组织病理学确诊为LSIL的情况（未明确指定细胞学为ASC-H，但文档描述了细胞学检查的一般处理）：  - 患者应每10-12周进行细胞学＋阴道镜检查。 - 若检查未发现浸润癌，则推迟至产后6-8周复查（复查包括细胞学+阴道镜+ECC）。  - 若产后复查无CINⅡ+（高级别病变），则转为常规筛查。  - 若产后复查出现CINⅡ+，则进行诊断性/治疗性宫颈切除术。 - 若妊娠期间细胞学＋阴道镜检查发现可疑浸润癌，则患者应立即行诊断性/治疗性宫颈切除术。 - 文档未明确区分细胞学为ASC-H或更高级别的特殊处理，但基于一般原则，上述步骤适用于所有细胞学异常（包括ASC-H）。  因此，随访步骤为：每10-12周进行细胞学＋阴道镜检查；若无浸润癌，推迟至产后复查；若可疑浸润癌，立即行宫颈切除术。 | A | A | A |
| Semantic Chunking | 在宫颈癌筛查中，如果妊娠患者组织病理学确认（活检）为LSIL，细胞学发现为ASC-H或更高级别，应该进行什么随访步骤？  回答：  根据上下文信息（文档片段1），对于妊娠期患者组织病理学确诊为LSIL且细胞学≥ASC-H时，应进行密切观察：每10~12周复查细胞学和阴道镜；产后6-8周再进行复查。后续处理取决于复查结果：  - 若复查出现异常（如发现浸润癌或其他进展），则按照异常处理流程进行处理。  - 若产后复查未发现CINⅡ及以上病变（即无CIN），则转为常规筛查。  依据： 文档片段1明确说明：“妊娠期患者...若细胞学≥ASC-H...应进入进行密切观察：每10~12周复查...产后6-8周进行复查。若复查出现异常...按照异常处理流程进行处理。若复查并未发现CIN...后续应转为常规筛查。” | B | A | A |
| NaiveRAG | 在宫颈癌筛查中，如果妊娠患者组织病理学确认（活检）为LSIL，细胞学发现为ASC-H或更高级别，应该进行什么随访步骤？  回答: 根据文档上下文（相似度0.474和0.444），对于妊娠患者，组织病理学确诊为LSIL且细胞学结果为ASC-H或更高级别（≥ASC-H）时，处理以密切观察为主，避免激进治疗，目标是排除浸润癌。具体步骤为每10-12周复查细胞学和阴道镜，密切监测；产后6-8周进行复查（细胞学+阴道镜+ECC）。如果复查未发现CIN（宫颈上皮内瘤变）或异常，则转为常规筛查；如果发现异常，则按异常处理流程进行。  - 具体步骤: 每10-12周复查细胞学+阴道镜，产后6-8周复查。  - 文档来源: "e.对于妊娠期患者，应每10-12周进行细胞学＋阴道镜检查。若未发现浸润癌，则应推迟至产后6-8周复查（细胞学+阴道镜+ECC）。"（相似度0.474）和 "妊娠期患者→应进入进行密切观察： • 每10~12周复查（密切监测，排除浸润癌）。产后6-8周进行复查。若复查出现异常，则应该按照异常处理流程进行处理。若复查并未发现CIN，则患者后续应转为常规筛查"（相似度0.444）。  所有回答均基于提供的文档片段，确保符合上下文信息。如果某个细节未在文档中明确覆盖（如问题21中的TZ类型未指定），我依据文档描述的流程进行了推断。 | B | A | A |
| Rerank | 在宫颈癌筛查中，如果妊娠患者组织病理学确认（活检）为LSIL，细胞学发现为ASC-H或更高级别，应该进行什么随访步骤？  回答：   根据上下文信息（文档片段10），对于妊娠患者组织病理学确诊为LSIL且细胞学≥ASC-H，随访步骤是进行密切观察：   - 每10-12周复查一次细胞学检查和阴道镜检查（密切监测，排除浸润癌）。   - 若未发现浸润癌，则推迟至产后6-8周进行复查（包括细胞学+阴道镜+ECC）。   - 若复查未发现CINⅡ或更高级别病变，则转为常规筛查；若发现CINⅡ或更高级别病变，则进行诊断性/治疗性宫颈切除术。   - 若妊娠期间检查发现可疑浸润癌，则立即行诊断性/治疗性宫颈切除术。   - 依据：文档片段10（相关性0.9183）明确描述“对于妊娠期患者，应每10-12周进行细胞学＋阴道镜检查”，并详细说明产后复查和处理流程。 | A | A | A |
| RSE | 在宫颈癌筛查中，如果妊娠患者组织病理学确认（活检）为LSIL，细胞学发现为ASC-H或更高级别，应该进行什么随访步骤？  基于上下文（图4：组织病理学确诊LSIL的处理流程），对于妊娠期患者（属于特殊人群），组织病理学确诊为LSIL且细胞学≥ASC-H，应进行密切观察，具体随访步骤为：   - 每10~12周进行细胞学＋阴道镜检查（密切监测，排除浸润癌）。  - 产后6-8周进行复查（细胞学+阴道镜+ECC）。  - 如果复查未发现CINⅡ+（即CIN2或更高级别），则转为常规筛查；如果发现CINⅡ+，则进行诊断性/治疗性宫颈切除术，后续流程如前所述。  - 如果妊娠期间检查发现可疑浸润癌，则立即行诊断性/治疗性宫颈切除术。   此信息直接来自上下文对妊娠期患者的处理描述。 | A | A | A |
| Non-RAG strategy | 在宫颈癌筛查中，如果妊娠患者组织病理学确认（活检）为LSIL，细胞学发现为ASC-H或更高级别，应该进行什么随访步骤？  推荐随访步骤：   - 推荐保守管理，避免任何切除手术或侵入性操作（如LEEP），以减少流产或早产风险。   - 在妊娠期间，每3个月进行一次细胞学检查和阴道镜评估（由经验丰富的医生操作），监测病变变化。分娩后6-8周，重新评估并决定是否需要进一步诊断或治疗（如产后切除手术）。 | A | A | A |
| **Question 26: 在宫颈癌筛查中，如果患者组织病理学确认（活检）为HSIL且TZ1/2分类，应该进行什么随访步骤？** | | | | |
| Context Enrichment | 在宫颈癌筛查中，如果患者组织病理学确认（活检）为HSIL且TZ1/2分类，应该进行什么随访步骤？  基于文档上下文（相似度0.574块）：  - 对于普通患者（非21-24岁，非妊娠期），如果组织病理学确诊HSIL且宫颈转化区类型为TZ1/2（转化区完全/部分可见），患者应首选诊断性/治疗性宫颈切除术。如果满足消融治疗适应证，可慎重选择宫颈消融治疗。 - 术后随访步骤：  - 若术后病理切缘阴性：应在4-6个月后复查，包括细胞学检查、阴道镜检查和子宫颈管搔刮术（ECC）。  - 若术后病理切缘阳性（切缘组织病理学报告CINⅡ及以上）：应在4-6个月后复查细胞学、阴道镜和ECC，并根据复查结果按照相应级别病变进行处理。  - 若术中发现可疑浸润癌：立即送病理检查，确诊后转宫颈癌治疗流程。 - 因此，随访步骤取决于术后病理结果：切缘阴性则4-6个月后复查（细胞学+阴道镜+ECC）；切缘阳性则4-6个月后复查并根据结果处理。 | A | A | A |
| Contextual Chunk Headers | 在宫颈癌筛查中，如果患者组织病理学确认（活检）为HSIL且TZ1/2分类，应该进行什么随访步骤？  回答：根据文档片段1（块主题：HSIL处理原则）和片段2（块主题：HSIL管理与治疗指南），普通患者（非21-24岁，非妊娠期）确诊HSIL（包括CINⅡ、CINⅢ等）且宫颈转化区类型为TZ1/2（转化区完全/部分可见）时：  - 首选处理：诊断性/治疗性宫颈切除术。若满足消融治疗适应证，可慎重选择宫颈消融治疗。  - 术后随访：  - 若术后病理切缘阴性：4-6个月后复查（细胞学 + 阴道镜 + 子宫颈管搔刮术/ECC）。  - 若术后病理切缘阳性（切缘报告CINⅡ及以上）：4-6个月后复查细胞学、阴道镜和ECC，并根据复查结果按相应级别病变处理。  - 若术中发现可疑浸润癌：立即送病理，确诊则转宫颈癌治疗流程。  - 依据：片段1正文内容（普通患者部分）和片段2的流程图及正文描述。 | A | A | A |
| Context Compression | 在宫颈癌筛查中，如果患者组织病理学确认（活检）为HSIL且TZ1/2分类，应该进行什么随访步骤？  回答：根据文档片段3（相关性: 0.800），对于普通患者（非21-24岁，非妊娠期），若组织病理学确诊为HSIL且宫颈转化区类型为TZ1/2（转化区完全/部分可见），患者应首选诊断性/治疗性宫颈切除术。如果满足消融治疗适应证（如冷冻、激光等），可慎重选择宫颈消融治疗。治疗后，根据文档片段8（相关性: 0.700），随访步骤包括：治疗后第一年每3个月进行一次宫颈细胞学检查；如果所有涂片结果正常，之后每年进行一次细胞学检查；高危HPV检测至少在治疗后6个月进行。此外，如果标本切缘证实为CIN，建议每4～6个月进行一次阴道镜检和宫颈管刮术，直至两次结果均正常，之后转为每年一次细胞学检查。 - 结论：随访步骤为：首选宫颈切除术或慎重选择消融治疗，然后进行强化随访（第一年每3个月细胞学检查，之后每年一次；HPV检测在治疗后6个月；必要时阴道镜和刮术）。 | A | A | A |
| CRAG | HSIL（TZ1/2分类）患者的随访步骤  知识库依据：   - 普通患者（非21-24岁，非妊娠期）：   - 首选诊断性/治疗性宫颈切除术（图5流程）。   - 若满足消融治疗适应证，可慎重选择宫颈消融治疗（"普通患者a"部分）。  - 术后管理：   - 切缘阴性：4-6个月后复查（细胞学+阴道镜+ECC）。   - 切缘阳性（CINⅡ+）：4-6个月后复查，按复查结果处理（"普通患者a"部分）。   > 结论：首选宫颈切除术，术后按切缘情况定期复查。 | A | A | A |
| Document Augmentation | 在宫颈癌筛查中，如果患者组织病理学确认（活检）为HSIL且TZ1/2分类，应该进行什么随访步骤？  根据文档片段2，对于组织病理学确诊HSIL（包括CINⅡ、CINⅡ/Ⅲ、CINⅢ、CINⅡ/P16(+)）的普通患者（非21-24岁，非妊娠期），如果宫颈转化区类型为TZ1/2（转化区完全/部分可见），患者应首选诊断性/治疗性宫颈切除术。如果满足消融治疗适应证，这类患者可慎重选择宫颈消融治疗。  术后随访步骤：  - 如果术后病理切缘阴性：应在4-6个月后复查（细胞学+阴道镜+ECC）。 - 如果术后病理切缘阳性（切缘组织病理学报告CINⅡ及以上）：应在4-6个月后复查细胞学、阴道镜和ECC，并根据复查结果按照相应级别病变进行处理。 - 如果术中发现可疑浸润癌：立即送病理，确诊则转宫颈癌治疗流程。 | A | A | A |
| Fusion RAG | 在宫颈癌筛查中，如果患者组织病理学确认（活检）为HSIL且TZ1/2分类，应该进行什么随访步骤？  根据上下文信息（相关文档1），对于组织病理学确诊为HSIL（包括CINⅡ、CINⅡ/Ⅲ、CINⅢ、CINⅡ/P16(+)）且宫颈转化区类型为TZ1/2（转化区完全或部分可见）的患者，处理原则如下：  - 处理步骤：首选诊断性/治疗性宫颈切除术（如LEEP或冷刀锥切）。如果满足消融治疗适应证（如病变局限、无浸润癌证据），可慎重选择宫颈消融治疗（如冷冻、激光）。  - 随访步骤：   - 如果术后病理切缘阴性：在4-6个月后复查，包括细胞学检查、阴道镜检查和宫颈管搔刮术（ECC）。   - 如果术后病理切缘阳性（切缘组织病理学报告CINⅡ及以上）：在4-6个月后复查细胞学、阴道镜和ECC，并根据复查结果（如病变级别）进行相应处理（例如，如果复查显示持续HSIL，可能需要重复切除术或转宫颈癌治疗流程）。   - 如果术中发现可疑浸润癌：立即送病理确诊，如确诊则转宫颈癌治疗流程。  此信息基于相关文档1的普通患者（非21-24岁，非妊娠期）管理原则。随访的核心是术后4-6个月的复查，以监测病变消退或进展。 | A | A | A |
| HyDE | 在宫颈癌筛查中，如果患者组织病理学确认（活检）为HSIL且TZ1/2分类，应该进行什么随访步骤？  根据文档上下文（例如，第一个文档片段），对于组织病理学确诊HSIL（包括CINⅡ、CINⅡ/Ⅲ、CINⅢ、CINⅡ/P16(+)）的普通患者（非21-24岁，非妊娠期），如果宫颈转化区类型为TZ1/2（转化区完全或部分可见），应首选诊断性/治疗性宫颈切除术。如果满足消融治疗适应证，可慎重选择宫颈消融治疗。具体随访步骤包括：  - 首选处理：进行诊断性/治疗性宫颈切除术。 - 术后管理：  - 如果术后病理切缘阴性：4-6个月后复查（包括细胞学检查、阴道镜检查和宫颈管搔刮术（ECC））。  - 如果术后病理切缘阳性（切缘组织病理学报告CINⅡ及以上）：4-6个月后复查细胞学、阴道镜和ECC，并根据复查结果按照相应级别病变进行处理。  - 如果术中发现可疑浸润癌：立即送病理检查，确诊后转宫颈癌治疗流程。  文档中明确提到，TZ1/2分类的患者可选择消融治疗，但需慎重，首选仍是宫颈切除术（来源：第一个文档片段，描述普通患者a部分）。 | A | A | A |
| Query Transformation | 在宫颈癌筛查中，如果患者组织病理学确认（活检）为HSIL且TZ1/2分类，应该进行什么随访步骤？  基于文档片段2（相似度: 0.645），对于普通患者（非21-24岁，非妊娠期），组织病理学确诊HSIL且宫颈转化区类型为TZ1/2（转化区完全/部分可见）时，患者应首选诊断性/治疗性宫颈切除术。如果满足消融治疗适应证（如病变范围适合），可慎重选择宫颈消融治疗（例如冷冻、激光等）。术后需进行随访：   - 若术后病理切缘阴性，应在4-6个月后复查（细胞学+阴道镜+ECC）。  - 若术后病理切缘阳性（切缘组织病理学报告CINⅡ及以上），应在4-6个月后复查细胞学、阴道镜和ECC，并根据复查结果按相应级别病变处理。  - 若术中发现可疑浸润癌，立即送病理，确诊则转宫颈癌治疗流程。   来源： 文档片段2明确描述了此流程。 | A | B | A |
| SelfRAG | 在宫颈癌筛查中，如果患者组织病理学确认（活检）为HSIL且TZ1/2分类，应该进行什么随访步骤？  根据文档内容（主要来自第二个相关文档片段），对于普通患者（非21-24岁，非妊娠期），组织病理学确诊为HSIL（包括CINⅡ、CINⅡ/Ⅲ、CINⅢ、CINⅡ/P16(+)）且宫颈转化区类型为TZ1/2（转化区完全/部分可见）时：  - 初始处理：首选诊断性/治疗性宫颈切除术。如果满足消融治疗适应证（如患者符合特定条件），可慎重选择宫颈消融治疗。 - 术后随访步骤：  - 如果术后病理切缘阴性（无CINⅡ及以上病变），则在4-6个月后复查（细胞学检查 + 阴道镜检查 + 宫颈管搔刮术（ECC））。  - 如果术后病理切缘阳性（切缘组织病理学报告为CINⅡ及以上），则在4-6个月后复查细胞学、阴道镜和ECC，并根据复查结果按照相应级别病变进行处理（例如，如果复查显示持续HSIL，可能需要进一步手术或治疗）。  - 如果术中发现可疑浸润癌，立即送病理确诊，并转入宫颈癌治疗流程。 - 长期随访：文档中提到，HSIL治疗后患者建议采用细胞学联合HPV检测的方法随诊20年。如果术后切缘阴性，建议术后6-12个月进行细胞学联合HPV检测复查；如果未发现病变持续，12个月后再次复查；连续两次检查未见异常后，可每3年复查。如果复查发现异常，按异常处理流程管理。  此回答基于第二个文档片段中关于普通患者HSIL TZ1/2的处理流程描述。 | A | A | A |
| Semantic Chunking | 在宫颈癌筛查中，如果患者组织病理学确认（活检）为HSIL且TZ1/2分类，应该进行什么随访步骤？  根据上下文信息： - HSIL（高度鳞状上皮内病变）对应组织病理学确诊的CINⅡ、CINⅡ/Ⅲ、CINⅢ或CINⅡ/P16(+)。 - TZ1/2分类表示宫颈转化区部分或完全可见。 - 文档片段1明确指出：“对于组织病理学确诊HSIL...宫颈转化区类型为TZ1/2（转化区完全/部分可见）则患者应首选诊断性/治疗性宫颈切除术。若满足消融治疗适应证时这类患者可慎重选择宫颈消融治疗。” - 文档片段6也支持此处理方案：“b．若患者织病理学确诊HSIL...宫颈转化区类型为TZ3...则患者应直接行诊断性/治疗性宫颈切除术”，但针对TZ1/2的情况未重复强调消融选项；然而片段1已明确提及消融作为可选方案。  因此，基于文档内容： - 随访步骤：首选诊断性/治疗性宫颈切除术（如LEEP或冷刀锥切）。如果满足消融治疗适应证（如病变范围小、无浸润证据），可慎重选择宫颈消融治疗。术后需根据病理结果进一步随访。 | A | A | A |
| NaiveRAG | 在宫颈癌筛查中，如果患者组织病理学确认（活检）为HSIL且TZ1/2分类，应该进行什么随访步骤？  回答：   根据文档上下文（例如相似度0.556和0.517的片段），对于普通患者（非21-24岁，非妊娠期），组织病理学确诊为HSIL（包括CIN II、CIN II/III、CIN III等）且转化区类型为TZ1/2（转化区完全或部分可见）时：   - 首选处理：应进行诊断性/治疗性宫颈切除术。如果满足消融治疗适应证（如病变范围小、无浸润迹象），可慎重选择宫颈消融治疗。   - 术后随访步骤：   - 如果术后病理切缘阴性（无CIN II及以上病变），则在4-6个月后复查（包括细胞学检查、阴道镜检查和宫颈管搔刮术ECC）。   - 如果术后病理切缘阳性（切缘组织病理学报告为CIN II及以上），则在4-6个月后复查细胞学、阴道镜和ECC，并根据复查结果按相应级别病变处理（如进展则转治疗流程）。   - 如果术中发现可疑浸润癌，立即送病理确诊，如确诊则转入宫颈癌治疗流程。   - 依据：文档中多次强调此流程（例如，“对于组织病理学确诊HSIL，宫颈转化区类型为TZ1/2则患者应首选诊断性/治疗性宫颈切除术”）。 | A | B | A |
| Rerank | 在宫颈癌筛查中，如果患者组织病理学确认（活检）为HSIL且TZ1/2分类，应该进行什么随访步骤？  回答：根据上下文（文档片段1和5），对于普通患者（非21-24岁，非妊娠期），组织病理学确诊HSIL（包括CINⅡ、CINⅡ/Ⅲ、CINⅢ）且TZ1/2分类（转化区完全或部分可见）的患者，首选进行诊断性/治疗性宫颈切除术。如果满足消融治疗适应证（如病变局限、无浸润癌迹象），可慎重选择宫颈消融治疗（如冷冻、激光等）。术后随访步骤如下：  - 如果宫颈切除术后病理切缘阴性：在4-6个月后复查细胞学、阴道镜和宫颈管搔刮术（ECC）。  - 如果宫颈切除术后病理切缘阳性（切缘报告CINⅡ及以上）：在4-6个月后复查细胞学、阴道镜和ECC，并根据复查结果按相应级别病变处理。  - 如果术中发现可疑浸润癌：立即送病理检查，确诊后转宫颈癌治疗流程。 - 依据：文档片段1明确指出：“若患者组织病理学确诊HSIL，宫颈转化区类型为TZ1/2（转化区完全/部分可见）则患者应首选诊断性/治疗性宫颈切除术。若满足消融治疗适应证时这类患者可慎重选择宫颈消融治疗。” 文档片段5和11进一步支持此流程。 | A | A | A |
| RSE | 在宫颈癌筛查中，如果患者组织病理学确认（活检）为HSIL且TZ1/2分类，应该进行什么随访步骤？  基于上下文信息（相关片段1的图5部分）：   - 对于普通患者（非21-24岁，非妊娠期），组织病理学确诊HSIL（包括CINⅡ、CINⅡ/Ⅲ、CINⅢ、CINⅡ/P16(+)）且宫颈转化区类型为TZ1/2（转化区完全或部分可见）时：   - 首选进行诊断性/治疗性宫颈切除术。   - 如果满足消融治疗适应证，可慎重选择宫颈消融治疗（但需谨慎评估）。  - 术后随访步骤：   - 若术后病理切缘阴性：4-6个月后复查（包括细胞学检查、阴道镜检查和宫颈管搔刮术（ECC））。   - 若术后病理切缘阳性（组织病理学报告CINⅡ及以上）：4-6个月后复查细胞学、阴道镜和ECC，并根据复查结果按相应级别病变处理。   - 若术中发现可疑浸润癌：立即送病理检查，确诊后转宫颈癌治疗流程。   综上，随访步骤以手术治疗为主，术后根据病理结果进行定期复查。 | A | A | A |
| Non-RAG strategy | 在宫颈癌筛查中，如果患者组织病理学确认（活检）为HSIL且TZ1/2分类，应该进行什么随访步骤？  随访步骤：推荐进行切除治疗（如环形电切术LEEP或冷刀锥切术）。   对于活检确认的HSIL（包括CIN2或CIN3），无论转化区（TZ）分类如何（TZ1或TZ2表示转化区完全或部分可见），均推荐切除治疗以消除病变，因为HSIL进展为浸润癌的风险较高 | B | A | A |
| **Question 27: 在宫颈癌筛查中，如果患者组织病理学确认（活检）为HSIL且TZ3分类，应该进行什么随访步骤？** | | | | |
| Context Enrichment | 在宫颈癌筛查中，如果患者组织病理学确认（活检）为HSIL且TZ3分类，应该进行什么随访步骤？  基于文档上下文（相似度0.574块）：  - 对于普通患者（非21-24岁，非妊娠期），如果组织病理学确诊HSIL且宫颈转化区类型为TZ3（转化区不可见），患者应直接行诊断性/治疗性宫颈切除术（不可选择消融治疗）。 - 术后随访步骤：  - 若术后病理切缘阴性：应在4-6个月后复查，包括细胞学检查、阴道镜检查和ECC。  - 若术后病理切缘阳性（CINⅡ及以上）：应在4-6个月后复查细胞学、阴道镜和ECC，并根据复查结果按照相应级别病变进行处理。  - 若术中发现可疑浸润癌：立即送病理检查，确诊后转宫颈癌治疗流程。 - 因此，随访步骤取决于术后病理结果：切缘阴性则4-6个月后复查（细胞学+阴道镜+ECC）；切缘阳性则4-6个月后复查并根据结果处理。 | A | A | A |
| Contextual Chunk Headers | 在宫颈癌筛查中，如果患者组织病理学确认（活检）为HSIL且TZ3分类，应该进行什么随访步骤？  回答：根据文档片段1（块主题：HSIL处理原则），普通患者确诊HSIL且宫颈转化区类型为TZ3（转化区不可见）时：  - 处理：直接行诊断性/治疗性宫颈切除术（不可选择消融治疗）。  - 术后随访：  - 若术后病理切缘阴性：4-6个月后复查（细胞学 + 阴道镜 + ECC）。  - 若术后病理切缘阳性（CINⅡ及以上）：4-6个月后复查细胞学、阴道镜和ECC，并根据复查结果按相应级别病变处理。  - 若术中发现可疑浸润癌：立即送病理，确诊则转宫颈癌治疗流程。  - 依据：片段1正文内容（普通患者部分，TZ3处理）。 | A | A | A |
| Context Compression | 在宫颈癌筛查中，如果患者组织病理学确认（活检）为HSIL且TZ3分类，应该进行什么随访步骤？  回答：根据文档片段3（相关性: 0.800），对于普通患者（非21-24岁，非妊娠期），若组织病理学确诊为HSIL且宫颈转化区类型为TZ3（转化区不可见），患者应直接行诊断性/治疗性宫颈切除术（不可选择消融治疗）。治疗后，根据文档片段8（相关性: 0.700），随访步骤包括：治疗后第一年每3个月进行一次宫颈细胞学检查；如果所有涂片结果正常，之后每年进行一次细胞学检查；高危HPV检测至少在治疗后6个月进行。此外，如果标本切缘证实为CIN，建议每4～6个月进行一次阴道镜检和宫颈管刮术，直至两次结果均正常，之后转为每年一次细胞学检查。 - 结论：随访步骤为：直接行宫颈切除术，然后进行强化随访（第一年每3个月细胞学检查，之后每年一次；HPV检测在治疗后6个月；必要时阴道镜和刮术）。 | A | A | A |
| CRAG | HSIL（TZ3分类）患者的随访步骤  知识库依据：   - 所有患者：   - 直接行诊断性/治疗性宫颈切除术（不可选择消融治疗）（"普通患者b"及图5流程）。  - 术后管理：   - 切缘阴性：4-6个月后复查（细胞学+阴道镜+ECC）。   - 切缘阳性（CINⅡ+）：4-6个月后复查，按结果处理（"普通患者b"部分）。   > 结论：必须行宫颈切除术，术后定期复查。 | A | A | A |
| Document Augmentation | 在宫颈癌筛查中，如果患者组织病理学确认（活检）为HSIL且TZ3分类，应该进行什么随访步骤？  根据文档片段2，对于组织病理学确诊HSIL的普通患者（非21-24岁，非妊娠期），如果宫颈转化区类型为TZ3（转化区不可见），患者应直接行诊断性/治疗性宫颈切除术（不可选择消融治疗）。  术后随访步骤：  - 如果术后病理切缘阴性：应在4-6个月后复查（细胞学+阴道镜+ECC）。 - 如果术后病理切缘阳性（CINⅡ及以上）：应在4-6个月后复查细胞学、阴道镜和ECC，并根据复查结果按照相应级别病变进行处理。 - 如果术中发现可疑浸润癌：立即送病理，确诊则转宫颈癌治疗流程。 | A | A | A |
| Fusion RAG | 在宫颈癌筛查中，如果患者组织病理学确认（活检）为HSIL且TZ3分类，应该进行什么随访步骤？  根据上下文信息（相关文档1），对于组织病理学确诊为HSIL且宫颈转化区类型为TZ3（转化区不可见）的患者，处理原则如下：  - 处理步骤：直接行诊断性/治疗性宫颈切除术（不可选择消融治疗），因为TZ3类型下病变可能位于宫颈管内，消融治疗风险较高。  - 随访步骤：   - 如果术后病理切缘阴性：在4-6个月后复查，包括细胞学检查、阴道镜检查和ECC。   - 如果术后病理切缘阳性（CINⅡ及以上）：在4-6个月后复查细胞学、阴道镜和ECC，并根据复查结果处理（例如，如果显示持续病变，需按相应级别病变处理）。   - 如果术中发现可疑浸润癌：立即送病理确诊，如确诊则转宫颈癌治疗流程。  此信息基于相关文档1的普通患者管理原则。随访强调术后4-6个月的复查，重点是排除残留或进展病变。 | A | B | A |
| HyDE | 在宫颈癌筛查中，如果患者组织病理学确认（活检）为HSIL且TZ3分类，应该进行什么随访步骤？  根据文档上下文（例如，第一个文档片段），对于组织病理学确诊HSIL的患者，如果宫颈转化区类型为TZ3（转化区不可见），应直接行诊断性/治疗性宫颈切除术，不可选择消融治疗。具体随访步骤包括：  - 首选处理：直接行诊断性/治疗性宫颈切除术。 - 术后管理：  - 如果术后病理切缘阴性：4-6个月后复查（包括细胞学检查、阴道镜检查和ECC）。  - 如果术后病理切缘阳性（CINⅡ及以上）：4-6个月后复查细胞学、阴道镜和ECC，并根据复查结果按照相应级别病变进行处理。  - 如果术中发现可疑浸润癌：立即送病理检查，确诊后转宫颈癌治疗流程。  文档中强调TZ3分类患者不可选择消融治疗，必须直接手术（来源：第一个文档片段，描述普通患者b部分）。 | B | A | A |
| Query Transformation | 在宫颈癌筛查中，如果患者组织病理学确认（活检）为HSIL且TZ3分类，应该进行什么随访步骤？  基于文档片段2（相似度: 0.645），对于组织病理学确诊HSIL且宫颈转化区类型为TZ3（转化区不可见）的患者，应直接行诊断性/治疗性宫颈切除术（不可选择消融治疗）。术后随访步骤包括：   - 若术后病理切缘阴性，应在4-6个月后复查（细胞学+阴道镜+ECC）。  - 若术后病理切缘阳性（CINⅡ及以上），应在4-6个月后复查细胞学、阴道镜和ECC，并根据复查结果按相应级别病变处理。  - 若术中发现可疑浸润癌，立即送病理，确诊则转宫颈癌治疗流程。   来源： 文档片段2详细说明了TZ3类型的处理，强调直接手术且不可用消融治疗。 | A | A | A |
| SelfRAG | 在宫颈癌筛查中，如果患者组织病理学确认（活检）为HSIL且TZ3分类，应该进行什么随访步骤？  根据文档内容（主要来自第二个相关文档片段），对于普通患者（非21-24岁，非妊娠期），组织病理学确诊为HSIL且宫颈转化区类型为TZ3（转化区不可见）时：  - 初始处理：直接行诊断性/治疗性宫颈切除术（不可选择消融治疗）。 - 术后随访步骤：  - 如果术后病理切缘阴性（无CINⅡ及以上病变），则在4-6个月后复查（细胞学检查 + 阴道镜检查 + ECC）。  - 如果术后病理切缘阳性（切缘组织病理学报告为CINⅡ及以上），则在4-6个月后复查细胞学、阴道镜和ECC，并根据复查结果按照相应级别病变进行处理。  - 如果术中发现可疑浸润癌，立即送病理确诊，并转入宫颈癌治疗流程。 - 长期随访：与问题26类似，HSIL治疗后建议采用细胞学联合HPV检测随诊20年。切缘阴性时，术后6-12个月复查细胞学联合HPV检测；如果正常，12个月后再复查；连续两次正常后每3年复查。如果发现异常，按流程管理。  此回答基于第二个文档片段中关于普通患者HSIL TZ3的处理流程描述。 | A | A | A |
| Semantic Chunking | 在宫颈癌筛查中，如果患者组织病理学确认（活检）为HSIL且TZ3分类，应该进行什么随访步骤？  根据上下文信息： - TZ3分类表示宫颈转化区不可见。 - 文档片段1明确指出：“若患者织病理学确诊HSIL，宫颈转化区类型为TZ3（转化区不可见）则患者应直接行诊断性/治疗性宫颈切除术（不可选择消融治疗）”。 - 文档片段6也确认：“b．若患者织病理学确诊HSIL...宫颈转化区类型为TZ3...则患者应直接行诊断性/治疗性宫颈切除术（不可选择消融治疗）”。  因此，基于文档内容： - 随访步骤：直接行诊断性/治疗性宫颈切除术（不可选择消融治疗）。术后需根据切缘情况随访：如果切缘阴性，4-6个月后复查细胞学+阴道镜+ECC；如果切缘阳性（CINⅡ及以上），4-6个月后复查细胞学、阴道镜和ECC；如果发现可疑浸润癌，立即转诊至宫颈癌治疗流程。 | A | A | A |
| NaiveRAG | 在宫颈癌筛查中，如果患者组织病理学确认（活检）为HSIL且TZ3分类，应该进行什么随访步骤？  回答：   根据文档上下文（例如相似度0.556和0.517的片段），对于普通患者（非21-24岁，非妊娠期），组织病理学确诊为HSIL且转化区类型为TZ3（转化区不可见）时：   - 首选处理：应直接行诊断性/治疗性宫颈切除术（不可选择消融治疗）。   - 术后随访步骤：   - 如果术后病理切缘阴性，则在4-6个月后复查（包括细胞学检查、阴道镜检查和ECC）。   - 如果术后病理切缘阳性（CIN II及以上），则在4-6个月后复查细胞学、阴道镜和ECC，并根据复查结果按相应级别病变处理。   - 如果术中发现可疑浸润癌，立即送病理确诊，如确诊则转入宫颈癌治疗流程。   - 依据：文档明确指出“若患者织病理学确诊HSIL，宫颈转化区类型为TZ3则患者应直接行诊断性/治疗性宫颈切除术（不可选择消融治疗）”。 | A | A | A |
| Rerank | 在宫颈癌筛查中，如果患者组织病理学确认（活检）为HSIL且TZ3分类，应该进行什么随访步骤？  回答：根据上下文（文档片段1和5），组织病理学确诊HSIL（包括CINⅡ、CINⅡ/Ⅲ、CINⅢ）且TZ3分类（转化区不可见）的患者，应直接行诊断性/治疗性宫颈切除术（不可选择消融治疗）。术后随访步骤如下：  - 如果宫颈切除术后病理切缘阴性：在4-6个月后复查细胞学、阴道镜和ECC。  - 如果宫颈切除术后病理切缘阳性（切缘报告CINⅡ及以上）：在4-6个月后复查细胞学、阴道镜和ECC，并根据复查结果按相应级别病变处理。  - 如果术中发现可疑浸润癌：立即送病理检查，确诊后转宫颈癌治疗流程。 - 依据：文档片段1明确说明：“若患者组织病理学确诊HSIL，宫颈转化区类型为TZ3（转化区不可见）则患者应直接行诊断性/治疗性宫颈切除术（不可选择消融治疗）。” 文档片段5和11重申了此原则。 | A | A | A |
| RSE | 在宫颈癌筛查中，如果患者组织病理学确认（活检）为HSIL且TZ3分类，应该进行什么随访步骤？  基于上下文信息（相关片段1的图5部分）：   - 对于普通患者（非21-24岁，非妊娠期），组织病理学确诊HSIL（包括CINⅡ、CINⅡ/Ⅲ、CINⅢ、CINⅡ/P16(+)）且宫颈转化区类型为TZ3（转化区不可见）时：   - 应直接行诊断性/治疗性宫颈切除术（不可选择消融治疗）。  - 术后随访步骤：   - 若术后病理切缘阴性：4-6个月后复查（包括细胞学检查、阴道镜检查和ECC）。   - 若术后病理切缘阳性（组织病理学报告CINⅡ及以上）：4-6个月后复查细胞学、阴道镜和ECC，并根据复查结果按相应级别病变处理。   - 若术中发现可疑浸润癌：立即送病理检查，确诊后转宫颈癌治疗流程。   综上，随访步骤以直接手术治疗为核心，术后根据病理结果进行复查。 | A | A | A |
| Non-RAG strategy | 在宫颈癌筛查中，如果患者组织病理学确认（活检）为HSIL且TZ3分类，应该进行什么随访步骤？  随访步骤：推荐进行切除治疗（如LEEP或冷刀锥切术）。   活检确认HSIL且TZ3分类（转化区不可见）时，切除治疗是首选，因为转化区不可见增加遗漏高级别病变或癌的风险 | A | A | A |
| **Question 28: 在宫颈癌筛查中，如果21至24岁患者组织病理学确认（活检）为CIN III/HSIL（宫颈上皮内瘤变III级/高度鳞状上皮内病变），应该进行什么随访步骤？** | | | | |
| Context Enrichment | 在宫颈癌筛查中，如果21至24岁患者组织病理学确认（活检）为CIN III/HSIL（宫颈上皮内瘤变III级/高度鳞状上皮内病变），应该进行什么随访步骤？  基于文档上下文（相似度0.574块）：  - 对于21-24岁患者，组织病理学确诊为CIN III/HSIL的处理分两种情况（依据宫颈转化区类型TZ）：  - 若转化区类型为TZ1/2型：可选择观察随访。随访步骤为每10-12周复查细胞学和阴道镜检查；若持续无进展，可继续观察；若病变进展或发现浸润癌，应行诊断性/治疗性宫颈切除术。  - 若转化区类型为TZ3型：应直接行诊断性/治疗性宫颈切除术。术后随访步骤：若切缘阴性，则4-6个月后复查（细胞学+阴道镜+ECC）；若切缘阳性，则4-6个月后复查并根据结果处理。 - 文档中未指定TZ类型时的默认处理，因此随访步骤取决于TZ分类：TZ1/2则观察随访（每10-12周复查）；TZ3则手术后随访。 | A | A | A |
| Contextual Chunk Headers | 在宫颈癌筛查中，如果21至24岁患者组织病理学确认（活检）为CIN III/HSIL（宫颈上皮内瘤变III级/高度鳞状上皮内病变），应该进行什么随访步骤？  回答：根据文档片段1（块主题：HSIL处理原则）和片段2（块主题：HSIL管理与治疗指南），21-24岁患者确诊CINⅢ/HSIL时：  - 处理原则：无论转化区类型，CINⅢ均建议治疗（片段2明确提到："年轻女性有生育要求...如果组织病理学明确为CINⅢ，建议进行治疗"）。  - 具体步骤：  - 若宫颈转化区为TZ1/2：可先观察（每10-12周复查细胞学 + 阴道镜），但若进展或发现浸润癌，则转诊断性/治疗性宫颈切除术（后续流程同普通患者）。  - 若宫颈转化区为TZ3：应直接行诊断性/治疗性宫颈切除术（后续流程同普通患者）。  - 依据：片段1（特殊人群部分）和片段2正文内容（CINⅢ治疗阈值）。 | A | A | A |
| Context Compression | 在宫颈癌筛查中，如果21至24岁患者组织病理学确认（活检）为CIN III/HSIL（宫颈上皮内瘤变III级/高度鳞状上皮内病变），应该进行什么随访步骤？  回答：根据文档片段1（相关性: 1.000），对于21-24岁患者组织病理学确诊为CIN III/HSIL，随访步骤取决于宫颈转化区类型（TZ分类）：  - 如果转化区类型为TZ1/2型：可选择观察（每10-12周复查细胞学+阴道镜）。若持续无进展，可继续观察；若病变进展或发现浸润癌，应行诊断性/治疗性宫颈切除术（文档片段1d）。  - 如果转化区类型为TZ3型：应直接行诊断性/治疗性宫颈切除术（文档片段1d）。治疗后，根据文档片段8（相关性: 0.700），随访步骤包括：治疗后第一年每3个月细胞学检查，之后每年一次；HPV检测在治疗后6个月；必要时阴道镜和刮术。 - 结论：由于问题未指定TZ类型，随访步骤需根据TZ分类决定：TZ1/2时选择观察性随访（每10-12周细胞学+阴道镜），TZ3时直接行宫颈切除术并术后随访。文档未提供无TZ指定时的默认方案，因此必须依据TZ分类。 | A | A | A |
| CRAG | 21-24岁患者CIN III/HSIL的随访步骤  知识库依据：   - 分层处理：   - TZ1/2型：可选择观察（每10-12周复查细胞学+阴道镜）。   - 持续无进展→继续观察。   - 进展或发现浸润癌→行宫颈切除术（"特殊人群d"部分）。   - TZ3型：直接行宫颈切除术（"特殊人群d"及图5流程）。   > 结论：根据转化区类型选择观察或手术。 | A | A | A |
| Document Augmentation | 在宫颈癌筛查中，如果21至24岁患者组织病理学确认（活检）为CIN III/HSIL（宫颈上皮内瘤变III级/高度鳞状上皮内病变），应该进行什么随访步骤？  根据文档片段1（c和d部分），对于21-24岁患者组织病理学确诊为CIN III/HSIL：  - 如果转化区类型为TZ1/2型，可选择观察（每10-12周复查细胞学+阴道镜）。若持续无进展，可继续观察；若病变进展或发现浸润癌，应行诊断性/治疗性宫颈切除术。 - 如果转化区类型为TZ3型，应直接行诊断性/治疗性宫颈切除术，后续流程如前所述（即术后根据切缘情况随访，如切缘阴性则4-6个月后复查细胞学+阴道镜+ECC等）。 | A | B | A |
| Fusion RAG | 在宫颈癌筛查中，如果21至24岁患者组织病理学确认（活检）为CIN III/HSIL（宫颈上皮内瘤变III级/高度鳞状上皮内病变），应该进行什么随访步骤？  根据上下文信息（相关文档1和相关文档2），对于21至24岁患者组织病理学确诊为CIN III/HSIL（HSIL包括CINⅢ），处理原则需结合宫颈转化区类型（TZ）：  - 处理步骤：   - 如果TZ类型为TZ1/2（转化区完全或部分可见）：患者可进行观察随访，每10-12周复查一次（包括细胞学检查和阴道镜检查）。   - 如果TZ类型为TZ3（转化区不可见）：患者应直接行诊断性/治疗性宫颈切除术。  - 随访步骤：   - 对于观察随访（TZ1/2）：   - 如果持续无进展（病变稳定或消退），继续每10-12周复查。   - 如果进展（如病变升级）或发现浸润癌，转治疗流程（行诊断性/治疗性宫颈切除术），术后随访同问题26或27的步骤（4-6个月复查）。   - 对于直接切除术（TZ3）：术后随访同问题27的步骤（4-6个月复查细胞学、阴道镜和ECC）。  此信息基于相关文档1的特殊人群（21-24岁）管理部分。问题中未指定TZ类型，因此回答覆盖了两种可能情况；实际临床中需根据阴道镜检查确定TZ类型后选择路径。 | A | A | A |
| HyDE | 在宫颈癌筛查中，如果21至24岁患者组织病理学确认（活检）为CIN III/HSIL（宫颈上皮内瘤变III级/高度鳞状上皮内病变），应该进行什么随访步骤？  根据文档上下文（例如，第二个文档片段），对于21-24岁患者组织病理学确诊为CIN III/HSIL的处理，需根据转化区类型（TZ）分层处理：  - 如果转化区类型为TZ1/2型：可选择观察随访，每10-12周复查细胞学和阴道镜检查。  - 若持续无进展，可继续观察。  - 若病变进展或发现浸润癌，应行诊断性/治疗性宫颈切除术，后续流程如前所述（即术后管理如问题26和27所述）。 - 如果转化区类型为TZ3型：应直接行诊断性/治疗性宫颈切除术，后续流程如前所述。  文档中明确提到此处理原则（来源：第二个文档片段，描述特殊人群d部分）。问题中未指定TZ类型，因此需根据实际TZ类型选择相应步骤。 | A | A | A |
| Query Transformation | 在宫颈癌筛查中，如果21至24岁患者组织病理学确认（活检）为CIN III/HSIL（宫颈上皮内瘤变III级/高度鳞状上皮内病变），应该进行什么随访步骤？  基于文档片段1（相似度: 0.701）和文档片段5（相似度: 0.524），对于21-24岁患者组织病理学确诊为CIN III/HSIL的情况，随访步骤取决于转化区类型（TZ）：   - 如果TZ类型为TZ1/2型（转化区完全/部分可见）： 可选择观察随访，每10-12周复查细胞学和阴道镜检查。   - 若持续无进展（病变未恶化），可继续观察。   - 若病变进展或发现浸润癌，应行诊断性/治疗性宫颈切除术，后续按宫颈癌治疗流程处理。  - 如果TZ类型为TZ3型（转化区不可见）： 应直接行诊断性/治疗性宫颈切除术，术后按前述流程随访（如4-6个月后复查）。   来源： 文档片段1的d部分和文档片段5的图表明确覆盖此年龄组和病变级别的管理。 | A | A | A |
| SelfRAG | 在宫颈癌筛查中，如果21至24岁患者组织病理学确认（活检）为CIN III/HSIL（宫颈上皮内瘤变III级/高度鳞状上皮内病变），应该进行什么随访步骤？  根据文档内容（主要来自第一个相关文档片段），对于21-24岁患者，组织病理学确诊为CIN III/HSIL时，随访步骤取决于宫颈转化区类型（TZ）：  - 如果转化区类型为TZ1/2（转化区完全/部分可见）：  - 可选择观察（每10-12周复查细胞学检查 + 阴道镜检查）。  - 如果持续无进展（无病变恶化），可继续观察。  - 如果病变进展或发现浸润癌，应行诊断性/治疗性宫颈切除术。术后随访如前所述（切缘阴性时4-6个月后复查细胞学+阴道镜+ECC；切缘阳性时4-6个月后复查并根据结果处理）。 - 如果转化区类型为TZ3（转化区不可见）：  - 应直接行诊断性/治疗性宫颈切除术。术后随访如前所述（切缘阴性时4-6个月后复查细胞学+阴道镜+ECC；切缘阳性时4-6个月后复查并根据结果处理）。 - 注意：文档强调，对于21-24岁患者，CIN III/HSIL的管理需根据TZ类型个性化处理，观察是可选方案仅适用于TZ1/2型。  此回答基于第一个文档片段中关于21-24岁患者CIN III/HSIL的具体描述（如点d部分）。 | A | A | A |
| Semantic Chunking | 在宫颈癌筛查中，如果21至24岁患者组织病理学确认（活检）为CIN III/HSIL（宫颈上皮内瘤变III级/高度鳞状上皮内病变），应该进行什么随访步骤？  根据上下文信息： - CIN III等同于HSIL。 - 针对21-24岁特殊人群的处理依赖于阴道镜检查结果（特别是转化区类型）。 - 文档片段1指出：“对于组织病理学确诊HSIL...特殊人群 a.若患者为21-24岁患者...则根据阴道镜检查结果处理：若阴道镜检查结果为TZ3型，则应进行诊断性宫颈切除术；若阴道镜检查结果为TZ1或TZ2型，则患者应每6~12周进行复查（密切监测，排除浸润癌）。若连续两次复查阴性则应转常规筛查。” - 文档片段6也提到类似内容：“a.若患者为21-24岁患者...且阴道镜检查结果为TZ3型，则应进行诊断性宫颈切除术；若为TZ1或TZ2型，则每10-12周复查。” - 此外，文档片段2提到：“年轻女性有生育要求...如果组织病理学明确为CINⅢ，建议进行治疗”，但未指定具体年龄组；而片段1和6针对21-24岁组提供了详细流程。  因此，基于文档内容： - 随访步骤：首先进行阴道镜检查以确定转化区类型（TZ）。  - 如果阴道镜检查结果为TZ3型： 应行诊断性/治疗性宫颈切除术。  - 如果阴道镜检查结果为TZ1或TZ2型： 应每6~12周复查一次（包括细胞学和阴道镜），密切监测以排除浸润癌。若连续两次复查阴性，则转为常规筛查。 - *注意：*由于问题未提供阴道镜结果或转化区类型，初始步骤必须包括阴道镜检查以指导后续管理。 | A | A | A |
| NaiveRAG | 在宫颈癌筛查中，如果21至24岁患者组织病理学确认（活检）为CIN III/HSIL（宫颈上皮内瘤变III级/高度鳞状上皮内病变），应该进行什么随访步骤？  回答：   根据文档上下文（例如相似度0.574和0.517的片段），对于21-24岁患者，组织病理学确诊为CIN III/HSIL时，处理取决于转化区类型（TZ）：   - 如果转化区类型为TZ1/2型：   - 可选择观察随访（非手术治疗）。   - 随访步骤：每10-12周复查细胞学检查和阴道镜检查。   - 如果持续无进展（病变未加重），可继续观察。   - 如果病变进展或发现浸润癌，应行诊断性/治疗性宫颈切除术，术后流程如前所述（如切缘阴性时4-6个月复查）。   - 如果转化区类型为TZ3型：   - 应直接行诊断性/治疗性宫颈切除术。   - 术后随访步骤：同问题27（切缘阴性时4-6个月复查；切缘阳性时4-6个月复查并根据结果处理）。   - 依据：文档明确说明“对于组织病理学确诊为CIN III/HSIL的21-24岁患者 → 若转化区类型为TZ1/2型，可选择观察（每10-12周复查细胞学+阴道镜）...若转化区类型为TZ3型，应直接行诊断性/治疗性宫颈切除术”。 | A | A | A |
| Rerank | 在宫颈癌筛查中，如果21至24岁患者组织病理学确认（活检）为CIN III/HSIL（宫颈上皮内瘤变III级/高度鳞状上皮内病变），应该进行什么随访步骤？  回答：根据上下文（文档片段5），21-24岁患者组织病理学确诊为CIN III/HSIL（即高度鳞状上皮内病变）时，随访步骤需根据宫颈转化区类型（TZ）分层处理：  - 如果TZ类型为TZ1/2（转化区完全或部分可见）：可选择观察随访，每10-12周复查细胞学和阴道镜检查。  - 若复查显示病变持续无进展，可继续观察。  - 若病变进展或发现可疑浸润癌，应行诊断性/治疗性宫颈切除术。  - 如果TZ类型为TZ3（转化区不可见）：应直接行诊断性/治疗性宫颈切除术，术后按标准流程随访（如切缘阴性则4-6月后复查细胞学+阴道镜+ECC）。 - 依据：文档片段5详细描述：“对于组织病理学确诊为CIN III/HSIL的21-24岁患者 → 若转化区类型为TZ1/2型，可选择观察（每10-12周复查细胞学+阴道镜）... 若转化区类型为TZ3型，应直接行诊断性/治疗性宫颈切除术。” 文档片段1和11支持此年龄组的特殊管理。 | A | A | A |
| RSE | 在宫颈癌筛查中，如果21至24岁患者组织病理学确认（活检）为CIN III/HSIL（宫颈上皮内瘤变III级/高度鳞状上皮内病变），应该进行什么随访步骤？  基于上下文信息（相关片段1的图5部分）：   - 对于21-24岁患者，组织病理学确诊为CIN III/HSIL时，随访步骤需根据宫颈转化区类型（TZ）分层处理：   - 若转化区类型为TZ1/2（转化区部分或完全可见）：可选择观察随访，每10-12周复查细胞学和阴道镜检查。   - 若持续无进展，可继续观察。   - 若病变进展或发现浸润癌，应行诊断性/治疗性宫颈切除术，术后流程参照普通患者（如问题26所述）。   - 若转化区类型为TZ3（转化区不可见）：应直接行诊断性/治疗性宫颈切除术，术后流程参照普通患者（如问题27所述）。   综上，随访步骤取决于TZ类型：TZ1/2允许观察随访，TZ3需直接手术治疗。 | A | A | A |
| Non-RAG strategy | 在宫颈癌筛查中，如果21至24岁患者组织病理学确认（活检）为CIN III/HSIL（宫颈上皮内瘤变III级/高度鳞状上皮内病变），应该进行什么随访步骤？  随访步骤：推荐进行切除治疗（如LEEP或冷刀锥切术）。   对于21-24岁年轻女性，活检确认CIN3（等同于HSIL）时，推荐切除治疗而非观察，因为CIN3进展风险高且自愈率低。 | C | B | C |
| **Question 29: 在宫颈癌筛查中，如果21至24岁患者组织病理学确认（活检）为HSIL且阴道镜检查为TZ3分类，应该进行什么随访步骤？** | | | | |
| Context Enrichment | 在宫颈癌筛查中，如果21至24岁患者组织病理学确认（活检）为HSIL且阴道镜检查为TZ3分类，应该进行什么随访步骤？  基于文档上下文（相似度0.574块）：  - 对于21-24岁患者，如果组织病理学确诊HSIL且阴道镜检查为TZ3型（转化区不可见），患者应直接行诊断性/治疗性宫颈切除术。 - 术后随访步骤：  - 若术后病理切缘阴性：应在4-6个月后复查，包括细胞学检查、阴道镜检查和ECC。  - 若术后病理切缘阳性（CINⅡ及以上）：应在4-6个月后复查细胞学、阴道镜和ECC，并根据复查结果按照相应级别病变进行处理。  - 若术中发现可疑浸润癌：立即送病理检查，确诊后转宫颈癌治疗流程。 - 因此，随访步骤是直接手术后，根据术后病理结果进行：切缘阴性则4-6个月后复查（细胞学+阴道镜+ECC）；切缘阳性则4-6个月后复查并根据结果处理。 | A | A | A |
| Contextual Chunk Headers | 在宫颈癌筛查中，如果21至24岁患者组织病理学确认（活检）为HSIL且阴道镜检查为TZ3分类，应该进行什么随访步骤？  回答：根据文档片段1（块主题：HSIL处理原则），21-24岁患者确诊HSIL且阴道镜检查为TZ3（转化区不可见）时：  - 处理：直接行诊断性/治疗性宫颈切除术。  - 术后随访：同普通患者（见问题27的随访步骤）。  - 依据：片段1正文内容（特殊人群部分，TZ3处理）。 | A | B | A |
| Context Compression | 在宫颈癌筛查中，如果21至24岁患者组织病理学确认（活检）为HSIL且阴道镜检查为TZ3分类，应该进行什么随访步骤？  回答：根据文档片段1（相关性: 1.000），对于21-24岁患者，若宫颈转化区类型为TZ3型（无论是否为CIN III/HSIL或一般HSIL），患者应直接行诊断性/治疗性宫颈切除术（文档片段1b和1d）。治疗后，根据文档片段8（相关性: 0.700），随访步骤包括：治疗后第一年每3个月进行一次宫颈细胞学检查；如果所有涂片结果正常，之后每年进行一次细胞学检查；高危HPV检测至少在治疗后6个月进行。此外，如果标本切缘证实为CIN，建议每4～6个月进行一次阴道镜检和宫颈管刮术，直至两次结果均正常，之后转为每年一次细胞学检查。 - 结论：随访步骤为：直接行宫颈切除术，然后进行强化随访（第一年每3个月细胞学检查，之后每年一次；HPV检测在治疗后6个月；必要时阴道镜和刮术）。 | B | A | A |
| CRAG | 21-24岁患者HSIL（TZ3分类）的随访步骤  知识库依据：   - 明确要求：    - 无论病理级别（CIN II/III/HSIL），TZ3型均需直接行诊断性/治疗性宫颈切除术（"特殊人群b"及图5流程）。   - 依据：    > "若患者为21-24岁患者，且宫颈转化区类型为TZ3型，则患者应直接行诊断性/治疗性宫颈切除术"。   > 结论：必须立即行宫颈切除术。 | A | A | A |
| Document Augmentation | 在宫颈癌筛查中，如果21至24岁患者组织病理学确认（活检）为HSIL且阴道镜检查为TZ3分类，应该进行什么随访步骤？  根据文档片段1（b部分），对于21-24岁患者，如果宫颈转化区类型为TZ3型，患者应直接行诊断性/治疗性宫颈切除术，后续流程如前所述（即术后根据切缘情况随访，如切缘阴性则4-6个月后复查细胞学+阴道镜+ECC等）。 | B | A | A |
| Fusion RAG | 在宫颈癌筛查中，如果21至24岁患者组织病理学确认（活检）为HSIL且阴道镜检查为TZ3分类，应该进行什么随访步骤？  根据上下文信息（相关文档1），对于21至24岁患者组织病理学确诊为HSIL且阴道镜检查为TZ3分类（转化区不可见），处理原则如下：  - 处理步骤：直接行诊断性/治疗性宫颈切除术（不可选择消融治疗），因为TZ3类型下病变可能较深或位于宫颈管内。  - 随访步骤：   - 如果术后病理切缘阴性：在4-6个月后复查，包括细胞学检查、阴道镜检查和ECC。   - 如果术后病理切缘阳性（CINⅡ及以上）：在4-6个月后复查细胞学、阴道镜和ECC，并根据复查结果处理（例如，如果显示持续HSIL，需重复切除术或按高级别病变处理）。   - 如果术中发现可疑浸润癌：立即送病理确诊，如确诊则转宫颈癌治疗流程。  此信息直接来自相关文档1的21-24岁患者管理部分（b.若患者为21-24岁患者，且宫颈转化区类型为TZ3型，则患者应直接行诊断性/治疗性宫颈切除术，后续流程如前所述）。随访核心是术后4-6个月的严密监测。 | A | C | A |
| HyDE | 在宫颈癌筛查中，如果21至24岁患者组织病理学确认（活检）为HSIL且阴道镜检查为TZ3分类，应该进行什么随访步骤？  根据文档上下文（例如，第二个文档片段），对于21-24岁患者组织病理学确诊HSIL且阴道镜检查为TZ3分类，应直接行诊断性/治疗性宫颈切除术。具体步骤包括：  - 首选处理：直接行诊断性/治疗性宫颈切除术。 - 后续流程：术后管理如前所述（即如果切缘阴性则4-6个月后复查；如果切缘阳性则4-6个月后复查并根据结果处理；如果发现浸润癌则转宫颈癌治疗流程）。  文档中明确指出TZ3分类的21-24岁HSIL患者必须直接手术，不可选择观察（来源：第二个文档片段，描述特殊人群b部分）。 | B | A | A |
| Query Transformation | 在宫颈癌筛查中，如果21至24岁患者组织病理学确认（活检）为HSIL且阴道镜检查为TZ3分类，应该进行什么随访步骤？  基于文档片段1（相似度: 0.701）的b和d部分，对于21-24岁患者组织病理学确诊HSIL且阴道镜检查为TZ3分类（转化区不可见）的情况，应直接行诊断性/治疗性宫颈切除术，不可选择观察或消融治疗。术后随访步骤包括：   - 若术后病理切缘阴性，应在4-6个月后复查（细胞学+阴道镜+ECC）。  - 若术后病理切缘阳性（CINⅡ及以上），应在4-6个月后复查细胞学、阴道镜和ECC，并根据复查结果按相应级别病变处理。  - 若术中发现可疑浸润癌，立即送病理，确诊则转宫颈癌治疗流程。   来源： 文档片段1 b部分和d部分明确指定TZ3类型需直接手术。 | A | A | A |
| SelfRAG | 在宫颈癌筛查中，如果21至24岁患者组织病理学确认（活检）为HSIL且阴道镜检查为TZ3分类，应该进行什么随访步骤？  根据文档内容（主要来自第一个相关文档片段），对于21-24岁患者，组织病理学确诊为HSIL且阴道镜检查为TZ3分类（转化区不可见）时：  - 初始处理：应直接行诊断性/治疗性宫颈切除术（不可选择观察或消融治疗）。 - 术后随访步骤：  - 如果术后病理切缘阴性（无CINⅡ及以上病变），则在4-6个月后复查（细胞学检查 + 阴道镜检查 + ECC）。  - 如果术后病理切缘阳性（切缘组织病理学报告为CINⅡ及以上），则在4-6个月后复查细胞学、阴道镜和ECC，并根据复查结果按照相应级别病变进行处理。  - 如果术中发现可疑浸润癌，立即送病理确诊，并转入宫颈癌治疗流程。 - 长期随访：文档中提到，HSIL治疗后建议采用细胞学联合HPV检测的方法随诊20年。具体随访间隔与问题26和27类似（术后6-12个月复查细胞学联合HPV检测，连续正常后延长间隔）。  此回答基于第一个文档片段中关于21-24岁患者HSIL TZ3的处理描述（如点b和d部分）。 | A | A | A |
| Semantic Chunking | 在宫颈癌筛查中，如果21至24岁患者组织病理学确认（活检）为HSIL且阴道镜检查为TZ3分类，应该进行什么随访步骤？  根据上下文信息： - HSIL对应CINⅢ或高级别病变。 - TZ3分类表示转化区不可见。 - 文档片段1明确指出：“对于若细胞学≥ASC-H的特殊人群：21~24岁患者则应只进行阴道镜检查。若阴道镜检查结果为TZ3型，则应进行诊断性宫颈切除术。”虽然这是针对细胞学异常人群的表述，但文档片段6在组织病理学背景下更直接：“b.若患者为21-24岁患者...且阴道镜检查结果为TZ3型，则应进行诊断性宫颈切除术”。 - 文档片段1的图5部分也提到：“b.若患者为21-24岁患者...且宫颈转化区类型为TZ3型...则患者应直接行诊断性/治疗性宫颈切除术”。  因此，基于文档内容： - 随访步骤：直接行诊断性/治疗性宫颈切除术。术后需根据切缘情况随访：如果切缘阴性，4-6个月后复查细胞学+阴道镜+ECC；如果切缘阳性（CINⅡ及以上），4-6个月后复查并根据结果处理；如果发现可疑浸润癌，立即转诊至宫颈癌治疗流程。 | B | A | A |
| NaiveRAG | 在宫颈癌筛查中，如果21至24岁患者组织病理学确认（活检）为HSIL且阴道镜检查为TZ3分类，应该进行什么随访步骤？  回答：   根据文档上下文（例如相似度0.574和0.517的片段），对于21-24岁患者，组织病理学确诊为HSIL且阴道镜检查为TZ3分类（转化区不可见）时：   - 首选处理：应直接行诊断性/治疗性宫颈切除术（不可选择观察或消融治疗）。   - 术后随访步骤：   - 如果术后病理切缘阴性，则在4-6个月后复查（包括细胞学检查、阴道镜检查和ECC）。   - 如果术后病理切缘阳性（CIN II及以上），则在4-6个月后复查细胞学、阴道镜和ECC，并根据复查结果按相应级别病变处理。   - 如果术中发现可疑浸润癌，立即送病理确诊，如确诊则转入宫颈癌治疗流程。   - 依据：文档指出“若患者为21-24岁患者，且宫颈转化区类型为TZ3型，则患者应直接行诊断性/治疗性宫颈切除术”，并适用于HSIL病例。 | A | A | A |
| Rerank | 在宫颈癌筛查中，如果21至24岁患者组织病理学确认（活检）为HSIL且阴道镜检查为TZ3分类，应该进行什么随访步骤？  回答：根据上下文（文档片段5），21-24岁患者组织病理学确诊HSIL（包括CIN III/HSIL）且阴道镜检查为TZ3分类（转化区不可见）时，应直接行诊断性/治疗性宫颈切除术。术后随访步骤如下：  - 如果宫颈切除术后病理切缘阴性：在4-6个月后复查细胞学、阴道镜和ECC。  - 如果宫颈切除术后病理切缘阳性（切缘报告CINⅡ及以上）：在4-6个月后复查细胞学、阴道镜和ECC，并根据复查结果按相应级别病变处理。  - 如果术中发现可疑浸润癌：立即送病理检查，确诊后转宫颈癌治疗流程。 - 依据：文档片段5明确指出：“对于组织病理学确诊为CIN III/HSIL的21-24岁患者 → 若转化区类型为TZ3型，应直接行诊断性/治疗性宫颈切除术。” 此原则同样适用于HSIL（因CIN III是HSIL的子集），文档片段1和11提供支持。 | A | A | A |
| RSE | 在宫颈癌筛查中，如果21至24岁患者组织病理学确认（活检）为HSIL且阴道镜检查为TZ3分类，应该进行什么随访步骤？  基于上下文信息（相关片段1的图5部分）：   - 对于21-24岁患者，组织病理学确诊HSIL（包括CINⅡ、CINⅡ/Ⅲ、CINⅢ、CINⅡ/P16(+)）且阴道镜检查为TZ3分类（转化区不可见）时：   - 应直接行诊断性/治疗性宫颈切除术（不可选择消融治疗）。  - 术后随访步骤：   - 若术后病理切缘阴性：4-6个月后复查（包括细胞学检查、阴道镜检查和ECC）。   - 若术后病理切缘阳性（组织病理学报告CINⅡ及以上）：4-6个月后复查细胞学、阴道镜和ECC，并根据复查结果按相应级别病变处理。   - 若术中发现可疑浸润癌：立即送病理检查，确诊后转宫颈癌治疗流程。   综上，随访步骤以直接手术治疗为主，术后根据病理结果进行定期复查。 | A | A | A |
| Non-RAG strategy | 在宫颈癌筛查中，如果21至24岁患者组织病理学确认（活检）为HSIL且阴道镜检查为TZ3分类，应该进行什么随访步骤？  随访步骤：推荐进行切除治疗（如LEEP或冷刀锥切术）。   依据：根据2019 ASCCP指南，对于21-24岁患者，活检HSIL（包括CIN3）且TZ3分类（转化区不可见）时，切除治疗是必要的，因为转化区不可见增加病变残留风险，且CIN3在年轻女性中仍需积极干预（ASCCP指南，风险管理和特殊人群推荐）。 | A | A | A |
| **Question 30: 在宫颈癌筛查中，如果21至24岁患者组织病理学确认（活检）为CIN II/III/HSIL或CIN II/HSIL且阴道镜检查为TZ1/2分类，应该进行什么随访步骤？** | | | | |
| Context Enrichment | 在宫颈癌筛查中，如果21至24岁患者组织病理学确认（活检）为CIN II/III/HSIL或CIN II/HSIL且阴道镜检查为TZ1/2分类，应该进行什么随访步骤？  基于文档上下文（相似度0.574块）：  - 对于21-24岁患者，组织病理学确诊为CIN II/III/HSIL或CIN II/HSIL且阴道镜检查为TZ1/2分类（转化区完全/部分可见），可选择观察随访。 - 随访步骤：  - 每10-12周复查细胞学和阴道镜检查。  - 若持续无进展，可继续观察。  - 若病变进展或发现浸润癌，应行诊断性/治疗性宫颈切除术。 - 因此，随访步骤是定期观察：每10-12周复查（细胞学+阴道镜），并根据复查结果决定是否继续观察或转手术治疗。  所有回答均严格基于提供的文档内容，未添加外部知识。如果文档中未明确提及某些细节（如具体复查项目缺失），我已依据最接近的描述回答。 | A | A | A |
| Contextual Chunk Headers | 在宫颈癌筛查中，如果21至24岁患者组织病理学确认（活检）为CIN II/III/HSIL或CIN II/HSIL且阴道镜检查为TZ1/2分类，应该进行什么随访步骤？  回答：根据文档片段1（块主题：HSIL处理原则）和片段2（块主题：HSIL管理与治疗指南），21-24岁患者确诊CINⅡ/HSIL（或CINⅡ/Ⅲ）且阴道镜检查为TZ1/2时：  - 处理：可进行观察随访（每10-12周复查细胞学 + 阴道镜）。  - 观察期间管理：  - 若持续无进展：继续观察。  - 若进展或发现浸润癌：转治疗流程，行诊断性/治疗性宫颈切除术（后续流程同普通患者）。  - 依据：片段1正文内容（特殊人群部分，TZ1/2处理）和片段2（提到CINⅡ可每6个月复查，但21-24岁人群优先观察）。   总结说明： - 所有回答均基于文档片段1、2的核心内容，未引用其他无关部分。 - 文档中未提及的情况（如妊娠期HSIL）未包含在本问题列表中，因此未涉及。 - 若实际临床中遇到复杂病例，建议结合最新指南和患者具体情况综合评估。 | A | A | A |
| Context Compression | 在宫颈癌筛查中，如果21至24岁患者组织病理学确认（活检）为CIN II/III/HSIL或CIN II/HSIL且阴道镜检查为TZ1/2分类，应该进行什么随访步骤？  回答：根据文档片段1（相关性: 1.000），对于21-24岁患者组织病理学确诊为CIN II/III/HSIL或CIN II/HSIL且阴道镜检查为TZ1/2分类，可选择观察（每10-12周复查细胞学+阴道镜）。若持续无进展，可继续观察；若病变进展或发现浸润癌，应行诊断性/治疗性宫颈切除术（文档片段1c）。文档未指定观察期间的具体持续时间，但强调每10-12周复查一次。 - 结论：随访步骤为：选择观察性随访，每10-12周复查细胞学和阴道镜；根据复查结果决定是否继续观察或转治疗。 | A | A | A |
| CRAG | 21-24岁患者CIN II/III/HSIL或CIN II/HSIL（TZ1/2分类）的随访步骤  知识库依据：   - 管理方案：    - 可选择观察（每10-12周复查细胞学+阴道镜）（"特殊人群c"部分）。   - 持续无进展→继续观察。   - 进展或发现浸润癌→行宫颈切除术（"特殊人群c"及图5流程）。   - 依据：    > "对于组织病理学确诊为CIN II/III/HSIL或CIN II/HSIL且阴道镜检查为TZ1/2分类的21-24岁患者→可选择观察"。   > 结论：可选择密切观察，进展时转手术治疗。 | A | A | A |
| Document Augmentation | 在宫颈癌筛查中，如果21至24岁患者组织病理学确认（活检）为CIN II/III/HSIL或CIN II/HSIL且阴道镜检查为TZ1/2分类，应该进行什么随访步骤？  根据文档片段1（c部分），对于21-24岁患者组织病理学确诊为CIN II/III/HSIL或CIN II/HSIL且阴道镜检查为TZ1/2分类，患者可选择观察（每10-12周复查细胞学+阴道镜）。若持续无进展，可继续观察；若病变进展或发现浸润癌，应行诊断性/治疗性宫颈切除术。 | A | A | A |
| Fusion RAG | 在宫颈癌筛查中，如果21至24岁患者组织病理学确认（活检）为CIN II/III/HSIL或CIN II/HSIL且阴道镜检查为TZ1/2分类，应该进行什么随访步骤？  根据上下文信息（相关文档1和相关文档2），对于21至24岁患者组织病理学确诊为CIN II/III/HSIL或CIN II/HSIL（均属于HSIL范畴）且阴道镜检查为TZ1/2分类（转化区完全或部分可见），处理原则如下：  - 处理步骤：患者可进行观察随访（而非立即手术），因为年轻患者有较高自然消退率。  - 随访步骤：   - 每10-12周复查一次，包括细胞学检查和阴道镜检查（相关文档1提到“可进行观察（每10-12周复查）”）。   - 如果连续复查显示病变持续无进展（如稳定或消退），继续观察。   - 如果病变进展（如升级为更高级别）或发现浸润癌，则转治疗流程（行诊断性/治疗性宫颈切除术），术后随访同问题26的步骤（4-6个月复查细胞学、阴道镜和ECC）。  此信息基于相关文档1的21-24岁患者管理部分（a.若患者为21-24岁患者，且宫颈转化区类型为TZ1/2型，则患者可进行观察）。随访强调高频次监测（每10-12周），以早期识别进展。   总结说明 - 所有回答均基于提供的上下文文档，特别是相关文档1（融合分数最高），该文档详细描述了HSIL的管理流程。 - 如果实际临床中遇到具体情况（如患者妊娠、其他合并症或资源限制），需结合最新指南和个体化评估调整管理策略。 - 无信息缺失情况：所有问题均能从上下文找到明确答案，无需声明“知识库中无法找到答案”。 | A | A | A |
| HyDE | 在宫颈癌筛查中，如果21至24岁患者组织病理学确认（活检）为CIN II/III/HSIL或CIN II/HSIL且阴道镜检查为TZ1/2分类，应该进行什么随访步骤？  根据文档上下文（例如，第二个文档片段），对于21-24岁患者组织病理学确诊为CIN II/III/HSIL或CIN II/HSIL且阴道镜检查为TZ1/2分类，可选择观察随访。具体步骤包括：  - 首选处理：可选择观察（每10-12周复查细胞学和阴道镜检查）。 - 观察期间管理：  - 若持续无进展，可继续观察。  - 若病变进展或发现浸润癌，应行诊断性/治疗性宫颈切除术，后续流程如前所述。  文档中明确描述此处理方案（来源：第二个文档片段，描述特殊人群c部分）。 | A | A | A |
| Query Transformation | 在宫颈癌筛查中，如果21至24岁患者组织病理学确认（活检）为CIN II/III/HSIL或CIN II/HSIL且阴道镜检查为TZ1/2分类，应该进行什么随访步骤？  基于文档片段1（相似度: 0.701）的c部分，对于21-24岁患者组织病理学确诊为CIN II/III/HSIL或CIN II/HSIL且阴道镜检查为TZ1/2分类（转化区完全/部分可见）的情况，可选择观察随访：   - 每10-12周复查细胞学和阴道镜检查。  - 若持续无进展（病变未恶化），可继续观察。  - 若病变进展或发现浸润癌，应行诊断性/治疗性宫颈切除术，后续按宫颈癌治疗流程处理。   来源： 文档片段1 c部分直接描述了此场景的处理方案。 | A | A | A |
| SelfRAG | 在宫颈癌筛查中，如果21至24岁患者组织病理学确认（活检）为CIN II/III/HSIL或CIN II/HSIL且阴道镜检查为TZ1/2分类，应该进行什么随访步骤？  根据文档内容（主要来自第一个相关文档片段），对于21-24岁患者，组织病理学确诊为CIN II/III/HSIL或CIN II/HSIL且阴道镜检查为TZ1/2分类（转化区完全/部分可见）时：  - 初始处理：可选择观察（每10-12周复查细胞学检查 + 阴道镜检查）。 - 观察期间随访步骤：  - 如果持续无进展（无病变恶化），可继续观察。  - 如果病变进展或发现浸润癌，应行诊断性/治疗性宫颈切除术。术后随访如前所述（切缘阴性时4-6个月后复查细胞学+阴道镜+ECC；切缘阳性时4-6个月后复查并根据结果处理）。 - 注意：文档指出，观察是可选方案，适用于TZ1/2型患者；如果选择不观察或病变恶化，则转入手术治疗流程。  此回答基于第一个文档片段中关于21-24岁患者CIN II/III/HSIL或CIN II/HSIL TZ1/2的具体描述（如点c部分）。  所有回答均基于提供的上下文信息，未添加外部知识。如果用户需要更详细的引用位置，我可以指出具体文档片段。 | A | A | A |
| Semantic Chunking | 在宫颈癌筛查中，如果21至24岁患者组织病理学确认（活检）为CIN II/III/HSIL或CIN II/HSIL且阴道镜检查为TZ1/2分类，应该进行什么随访步骤？  根据上下文信息： - CIN II/III等同于HSIL；CIN II/P16(+)也按HSIL管理。 - TZ1/2分类表示转化区部分或完全可见。 - 文档片段1明确指出：“对于组织病理学确诊HSIL...特殊人群 a.若患者为21-24岁患者...且阴道镜检查结果为TZ1或TZ2型...则患者应每6~12周进行复查（密切监测，排除浸润癌）。若连续两次复查阴性则应转常规筛查。” - 文档片段6也确认：“a.若患者为21-24岁患者...且宫颈转化区类型为TZ1/2型...则患者可进行观察（每10-12周复查）”。 - 文档片段4补充了LSIL/CIN I的管理但未覆盖此场景；而针对HSIL/CIN II-III的年轻人群处理一致。  因此，基于文档内容： - 随访步骤：每6~12周进行一次复查（包括细胞学和阴道镜检查），密切监测以排除浸润癌。若连续两次复查阴性（无异常发现），则转为常规筛查。无需立即手术治疗。   总结 所有回答均严格基于提供的文档片段内容。如果有任何细节未在上下文中明确提及（如问题28未指定转化区类型），我依据文档逻辑推断必要步骤。未发现“知识库中未找到答案”的情况。 | A | A | A |
| NaiveRAG | 在宫颈癌筛查中，如果21至24岁患者组织病理学确认（活检）为CIN II/III/HSIL或CIN II/HSIL且阴道镜检查为TZ1/2分类，应该进行什么随访步骤？  回答：   根据文档上下文（例如相似度0.574的片段），对于21-24岁患者，组织病理学确诊为CIN II/III/HSIL或CIN II/HSIL且阴道镜检查为TZ1/2分类（转化区完全或部分可见）时：   - 首选处理：可选择观察随访（非手术治疗）。   - 随访步骤：每10-12周复查细胞学检查和阴道镜检查。   - 如果持续无进展（病变未加重），可继续观察。   - 如果病变进展或发现浸润癌，应行诊断性/治疗性宫颈切除术，术后流程如前所述（如切缘阴性时4-6个月复查；切缘阳性时4-6个月复查并根据结果处理）。   - 依据：文档明确说明“对于组织病理学确诊为CIN II/III/HSIL或CIN II/HSIL且阴道镜检查为TZ1/2分类的21-24岁患者 → 可选择观察（每10-12周复查细胞学+阴道镜）...若持续无进展，可继续观察；若病变进展或发现浸润癌，应行诊断性/治疗性宫颈切除术”。 | A | A | A |
| Rerank | 在宫颈癌筛查中，如果21至24岁患者组织病理学确认（活检）为CIN II/III/HSIL或CIN II/HSIL且阴道镜检查为TZ1/2分类，应该进行什么随访步骤？  回答：根据上下文（文档片段5），21-24岁患者组织病理学确诊为CIN II/III/HSIL或CIN II/HSIL（即高度鳞状上皮内病变）且阴道镜检查为TZ1/2分类（转化区完全或部分可见）时，可选择观察随访。具体步骤如下：  - 每10-12周复查细胞学和阴道镜检查。  - 若复查显示病变持续无进展，可继续观察。  - 若病变进展或发现可疑浸润癌，应行诊断性/治疗性宫颈切除术。 - 依据：文档片段5明确说明：“对于组织病理学确诊为CIN II/III/HSIL或CIN II/HSIL且阴道镜检查为TZ1/2分类的21-24岁患者 → 可选择观察（每10-12周复查细胞学+阴道镜）... 若病变进展或发现浸润癌，应行诊断性/治疗性宫颈切除术。” 文档片段1和11强调年轻患者的保守管理策略。 | B | A | A |
| RSE | 在宫颈癌筛查中，如果21至24岁患者组织病理学确认（活检）为CIN II/III/HSIL或CIN II/HSIL且阴道镜检查为TZ1/2分类，应该进行什么随访步骤？  基于上下文信息（相关片段1的图5部分）：   - 对于21-24岁患者，组织病理学确诊为CIN II/III/HSIL或CIN II/HSIL且阴道镜检查为TZ1/2分类（转化区部分或完全可见）时：   - 可选择观察随访，每10-12周复查细胞学和阴道镜检查。   - 若持续无进展，可继续观察。   - 若病变进展或发现浸润癌，应行诊断性/治疗性宫颈切除术，术后流程参照普通患者（如问题26所述）。   综上，随访步骤以观察随访为主，定期监测病变变化，仅在进展时转手术治疗。 | A | A | A |
| Non-RAG strategy | 在宫颈癌筛查中，如果21至24岁患者组织病理学确认（活检）为CIN II/III/HSIL或CIN II/HSIL且阴道镜检查为TZ1/2分类，应该进行什么随访步骤？  随访步骤：   - 如果活检结果为CIN2（或CIN II/HSIL），推荐观察随访（每6个月进行细胞学检查和阴道镜检查）。   - 如果活检结果为CIN3（或CIN III/HSIL），推荐切除治疗（如LEEP或冷刀锥切术）。   依据：对于21-24岁患者，活检CIN2且TZ1/2分类（转化区完全或部分可见）时，优先选择观察随访，因为年轻女性CIN2自愈率高；而活检CIN3则推荐切除治疗，无论TZ分类。问题中“CIN II/III/HSIL或CIN II/HSIL”涵盖CIN2和CIN3，因此管理需根据具体病理结果区分。 | B | B | B |
| **Question 31: 在宫颈癌筛查中，如果妊娠患者组织病理学确认（活检）为HSIL，应该进行什么随访步骤？** | | | | |
| Context Enrichment | 在宫颈癌筛查中，如果妊娠患者组织病理学确认（活检）为HSIL，应该进行什么随访步骤？  基于文档内容（例如，相似度0.588的片段和相似度0.461的片段）：  - 妊娠患者组织病理学确诊为HSIL（包括CINⅡ、CINⅡ/Ⅲ、CINⅢ、CINⅡ/P16(+)）时，应每10-12周进行一次细胞学检查联合阴道镜检查，以密切监测排除浸润癌。  - 如果妊娠期间未发现浸润癌，随访应推迟至产后6-8周进行复查（包括细胞学、阴道镜和宫颈管搔刮术（ECC））。  - 如果妊娠期间检查发现可疑浸润癌，则应立即行诊断性/治疗性宫颈切除术，并转宫颈癌治疗流程。  总结随访步骤：每10-12周细胞学 + 阴道镜检查 → 若未发现浸润癌，则产后6-8周复查（细胞学 + 阴道镜 + ECC）。 | A | A | A |
| Contextual Chunk Headers | 在宫颈癌筛查中，如果妊娠患者组织病理学确认（活检）为HSIL，应该进行什么随访步骤？  根据文档片段1（块主题：妊娠期宫颈癌筛查流程）、片段3（块主题：HSIL处理原则）和片段12（块主题：HSIL管理与治疗指南）： - 随访步骤：妊娠期间应每10-12周进行一次细胞学检查联合阴道镜检查，以密切监测并排除浸润癌。若未发现浸润癌，则推迟至产后6-8周进行复查（复查内容包括细胞学检查、阴道镜检查和宫颈管搔刮术（ECC））。 - 依据：文档片段1明确说明："对于妊娠期患者，应每10-12周进行细胞学＋阴道镜检查。若未发现浸润癌，则应推迟至产后6-8周复查（细胞学+阴道镜+ECC）"。片段3和片段12进一步确认此观察策略适用于HSIL妊娠患者。  # | A | A | A |
| Context Compression | 在宫颈癌筛查中，如果妊娠患者组织病理学确认（活检）为HSIL，应该进行什么随访步骤？  基于文档内容，妊娠期患者组织病理学确认为HSIL（高级别鳞状上皮内病变，包括CIN II和CIN III）时，随访步骤以排除浸润癌为主要目标，并强调密切监测。相关文档片段（片段1、2、3、5、8、9）指出：  - 妊娠期间：应每10-12周进行一次细胞学检查联合阴道镜检查，以密切监测并排除浸润癌（片段1、5、8）。如果未发现浸润癌，则继续妊娠至足月（片段3）。  - 具体步骤：每10-12周复查细胞学和阴道镜（片段1、5、8），必要时可结合ECC（宫颈管刮术）评估（片段2）。  - 依据：片段1明确说明“对于妊娠期患者，应每10-12周进行细胞学＋阴道镜检查。若未发现浸润癌，则应推迟至产后6-8周复查”；片段5和8重申此频率，强调“排除浸润癌”。  因此，随访步骤为：妊娠期每10-12周进行细胞学检查+阴道镜检查；若无浸润癌证据，随访至产后复查。 | A | A | A |
| CRAG | 妊娠期患者组织病理学确诊HSIL的随访步骤  知识库文档（图5处理流程）： - 每10-12周进行细胞学检查+阴道镜检查，密切监测排除浸润癌。 - 若妊娠期间未发现浸润癌，则推迟至产后6-8周复查（细胞学+阴道镜+ECC）。 - 来源：知识库文档（图5：组织病理学确诊HSIL的处理流程）  网络搜索结果补充： - 强调无浸润癌证据时，每12孕周复查细胞学及阴道镜，产后6-8周复查。 - 来源：网络搜索内容（"HSIL妊娠期妇女"部分）  结论：妊娠期HSIL患者需定期复查（10-12周/次），产后6-8周全面复查。 | A | B | A |
| Document Augmentation | 在宫颈癌筛查中，如果妊娠患者组织病理学确认（活检）为HSIL，应该进行什么随访步骤？  回答：根据文档片段1和片段6，妊娠期HSIL患者（无浸润癌证据）应每10-12周进行细胞学检查＋阴道镜检查，以密切监测排除浸润癌。若未发现浸润癌，则推迟至产后6-8周复查（细胞学+阴道镜+ECC）。若妊娠期间检查发现可疑浸润癌，则需行诊断性/治疗性宫颈切除术（片段1："对于妊娠期患者，应每10-12周进行细胞学＋阴道镜检查"；片段6："妊娠期组织病理学HSIL...应每10-12周复查细胞学+阴道镜"）。 | A | A | A |
| Fusion RAG | 在宫颈癌筛查中，如果妊娠患者组织病理学确认（活检）为HSIL，应该进行什么随访步骤？  根据文档内容（文档1、文档6、文档7、文档11、文档13），妊娠患者组织病理学确诊为HSIL（高度鳞状上皮内病变）时，主要目标是排除浸润癌。随访步骤如下：  - 妊娠期间：每10-12周进行一次细胞学检查（如巴氏涂片）和阴道镜检查，以监测病变进展和排除浸润癌。  - 如果未发现浸润癌：继续妊娠，并推迟进一步处理至产后。  - 如果发现可疑浸润癌：立即行诊断性/治疗性宫颈切除术，并转至宫颈癌治疗流程。  此流程基于文档6和文档11中关于妊娠期HSIL管理的描述，强调密切监测以避免对母婴造成风险。 | A | B | A |
| HyDE | 在宫颈癌筛查中，如果妊娠患者组织病理学确认（活检）为HSIL，应该进行什么随访步骤？  答案：根据上下文信息（HyDE相似度0.749和0.475），妊娠期HSIL患者的随访步骤如下：  1. 妊娠期间：每10-12周进行一次细胞学检查联合阴道镜检查，以排除浸润癌。  2. 若未发现浸润癌：推迟至产后6-8周进行复查，复查内容包括细胞学、阴道镜和宫颈管搔刮术（ECC）。  3. 若发现可疑浸润癌：立即行诊断性/治疗性宫颈切除术，并转入宫颈癌治疗流程。  - 引用依据："对于妊娠期患者，应每10-12周进行细胞学＋阴道镜检查。若未发现浸润癌，则应推迟至产后6-8周复查（细胞学+阴道镜+ECC）。若妊娠期间细胞学＋阴道镜检查发现可疑浸润癌，则患者应行诊断性/治疗性宫颈切除术"（HyDE相似度0.749）。 | A | A | A |
| Query Transformation | 在宫颈癌筛查中，如果妊娠患者组织病理学确认（活检）为HSIL，应该进行什么随访步骤？  基于文档内容，妊娠患者组织病理学确诊为HSIL（高级别鳞状上皮内病变，包括CINⅡ、CINⅡ/Ⅲ、CINⅢ或CINⅡ/P16阳性）时，主要目标是排除浸润癌，并采取密切监测的随访策略。具体随访步骤如下：  - 妊娠期间：每10-12周进行一次细胞学检查（如巴氏涂片）和阴道镜检查，以监测病变进展或排除浸润癌（来源：文档片段1、文档片段4、文档片段9、文档片段13）。  - 如果未发现浸润癌：随访持续至分娩，产后6-8周进行复查（复查内容包括细胞学检查、阴道镜检查和宫颈管搔刮术（ECC））（来源：文档片段1、文档片段4）。  - 如果妊娠期间发现可疑浸润癌：应立即行诊断性/治疗性宫颈切除术，并转至宫颈癌治疗流程（来源：文档片段1）。   关键依据：文档片段1明确提到“对于妊娠期患者，应每10-12周进行细胞学＋阴道镜检查。若未发现浸润癌，则应推迟至产后6-8周复查（细胞学+阴道镜+ECC）”。文档片段4和文档片段13也重复了这一管理流程。 | A | B | A |
| SelfRAG | 在宫颈癌筛查中，如果妊娠患者组织病理学确认（活检）为HSIL，应该进行什么随访步骤？  根据文档内容，对于妊娠期患者组织病理学确诊为HSIL（高级别鳞状上皮内病变），随访步骤如下：  - 应每10-12周进行细胞学检查（如巴氏涂片）和阴道镜检查，以监测病情并排除浸润癌。  - 如果在妊娠期间未发现浸润癌，则推迟至产后6-8周进行复查，复查内容包括细胞学检查、阴道镜检查和宫颈管搔刮术（ECC）。  （来源：文档片段中多次提到，例如“对于妊娠期患者，应每10-12周进行细胞学＋阴道镜检查。若未发现浸润癌，则应推迟至产后6-8周复查（细胞学+阴道镜+ECC）。”） | A | A | A |
| Semantic Chunking | 在宫颈癌筛查中，如果妊娠患者组织病理学确认（活检）为HSIL，应该进行什么随访步骤？  根据上下文信息（主要来自文档片段1、2、8和27）：  - 妊娠期HSIL患者的管理目标是排除浸润癌。  - 随访步骤包括：每10-12周进行一次细胞学检查（如巴氏涂片）和阴道镜检查，以密切监测病情变化并排除浸润癌。  - 如果在妊娠期间未发现浸润癌证据（如文档所述“无浸润癌”），则推迟进一步处理至产后。  总结步骤：   1. 每10-12周重复细胞学和阴道镜检查。   2. 持续监测直至分娩。 | A | A | A |
| NaiveRAG | 在宫颈癌筛查中，如果妊娠患者组织病理学确认（活检）为HSIL，应该进行什么随访步骤？  在文档中，针对妊娠期患者组织病理学确认为HSIL（高度鳞状上皮内病变，包括CINⅡ、CINⅡ/Ⅲ、CINⅢ等）的情况，提供了明确的随访步骤。根据上下文（例如相似度0.461和0.439的片段），妊娠期HSIL患者的首要目标是排除浸润癌，因此推荐密切监测而非立即治疗。随访步骤包括：  - 妊娠期间：每10-12周进行一次细胞学检查（如巴氏涂片）和阴道镜检查，以监测病变进展和排除浸润癌。  - 如果未发现浸润癌：随访应推迟至产后6-8周进行复查，复查内容包括细胞学检查、阴道镜检查和宫颈管搔刮术（ECC）。  - 如果妊娠期间检查发现可疑浸润癌：患者应立即行诊断性/治疗性宫颈切除术，并转入宫颈癌治疗流程。   此信息基于文档中多次提及的妊娠期管理原则（例如：“对于妊娠期患者，应每10-12周进行细胞学＋阴道镜检查。若未发现浸润癌，则应推迟至产后6-8周复查（细胞学+阴道镜+ECC）。”）。 | A | A | A |
| Rerank | 在宫颈癌筛查中，如果妊娠患者组织病理学确认（活检）为HSIL，应该进行什么随访步骤？  根据上下文信息（文档片段3、4和6），妊娠患者组织病理学确诊为HSIL（高级别鳞状上皮内病变）时，主要目标是排除浸润癌。随访步骤如下： - 妊娠期间：每10-12周进行一次细胞学检查（如宫颈涂片）联合阴道镜检查，以监测病变进展和排除浸润癌（片段3：相关性0.9232；片段4：相关性0.9173；片段6：相关性0.8574）。 - 如果未发现浸润癌：继续妊娠，并维持上述随访频率，直至分娩。 - 如果发现可疑浸润癌：需立即行诊断性/治疗性宫颈切除术，并转宫颈癌治疗流程（片段4：相关性0.9173）。  此随访策略基于妊娠期生理变化，旨在避免过度干预，同时确保及时识别恶性进展。  # | A | B | A |
| RSE | 在宫颈癌筛查中，如果妊娠患者组织病理学确认（活检）为HSIL，应该进行什么随访步骤？  根据上下文信息（相关片段 1 和 相关片段 3），对于妊娠期患者组织病理学确诊为HSIL（包括CINⅡ、CINⅡ/Ⅲ、CINⅢ、CINⅡ/P16(+)）的情况，随访步骤如下：  - 妊娠期间：每10-12周进行一次细胞学检查联合阴道镜检查。  - 如果在妊娠期间未发现浸润癌，则推迟至产后6-8周进行复查，复查内容包括细胞学检查、阴道镜检查及宫颈管搔刮（ECC）。  - 如果在妊娠期间细胞学＋阴道镜检查发现可疑浸润癌，则应立即行诊断性/治疗性宫颈切除术，并转宫颈癌治疗流程。  此信息基于相关片段 1（普通患者处理原则中的特殊人群部分）和相关片段 3（组织病理学确诊的HSIL管理原则）。 | A | A | A |
| Non-RAG strategy | 在宫颈癌筛查中，如果妊娠患者组织病理学确认（活检）为HSIL，应该进行什么随访步骤？  妊娠患者活检确诊为高级别鳞状上皮内病变（HSIL，包括CIN 2或CIN 3）时，随访步骤包括： - 妊娠期间：每3个月进行一次细胞学检查联合阴道镜检查，以监测病变进展并排除浸润性癌。避免在妊娠期进行任何治疗性干预（如锥切术），除非高度怀疑浸润性癌。 - 分娩后： - 如果在妊娠期间未发现浸润癌,在产后6-8周重新进行阴道镜检查和活检，以评估病变状态并决定后续管理。 - 如果妊娠期间发现浸润癌：需立即行诊断性/治疗性宫颈切除术. 此策略基于风险分层管理，旨在最小化妊娠期风险，同时确保产后及时诊断和治疗。 | A | B | A |
| **Question 32: 宫颈癌诊断性/治疗性宫颈锥切术后，应该进行什么随访步骤？** | | | | |
| Context Enrichment | 宫颈癌诊断性/治疗性宫颈锥切术后，应该进行什么随访步骤？  基于文档内容（例如，相似度0.588的片段）：  - 宫颈锥切术（即诊断性/治疗性宫颈切除术）后的随访取决于术后病理切缘结果：   - 切缘阴性（无CINⅡ及以上病变）：术后4-6个月复查，包括细胞学检查、阴道镜检查和ECC。   - 切缘阳性（切缘组织病理学报告为CINⅡ及以上）：术后4-6个月复查细胞学、阴道镜和ECC；复查结果根据病变级别进行相应处理（如按高级别病变管理）。   - 术中发现可疑浸润癌：立即送病理检查，确诊后转宫颈癌治疗流程。  总结随访步骤：术后4-6个月复查（细胞学 + 阴道镜 + ECC），具体根据切缘结果调整后续处理。 | A | A | A |
| Contextual Chunk Headers | 宫颈癌诊断性/治疗性宫颈锥切术后，应该进行什么随访步骤？  根据文档片段3（块主题：HSIL处理原则）和片段12（块主题：HSIL管理与治疗指南）： - 随访步骤：  - 切缘阴性：术后4-6个月复查细胞学检查、阴道镜检查和ECC。  - 切缘阳性（组织病理学报告CINⅡ及以上）：术后4-6个月复查细胞学检查、阴道镜检查和ECC，并根据复查结果按相应级别病变处理（如持续异常则需进一步治疗）。  - 发现可疑浸润癌：立即送病理检查，确诊后转入宫颈癌治疗流程。 - 依据：文档片段3详细描述："若患者诊断性/治疗性宫颈切除术后病理切缘阴性：4-6月后复查（细胞学+阴道镜+ECC）。若切缘阳性（CINⅡ及以上）：则应在4-6个月后复查细胞学，阴道镜，ECC"。片段12补充了切缘阳性的管理原则。  # | A | A | A |
| Context Compression | 宫颈癌诊断性/治疗性宫颈锥切术后，应该进行什么随访步骤？  基于文档内容，宫颈锥切术后的随访步骤取决于术后病理结果，特别是切缘状态（阴性或阳性）。相关文档片段（片段2、4、11、12）提供以下指导：  - 切缘阴性（无HSIL病变）：术后4-6个月复查，包括细胞学检查+阴道镜检查+ECC（宫颈管刮术）（片段4）。之后，建议术后6-12个月进行细胞学联合HPV检测复查；若结果正常，12个月后再次复查；连续2次正常后，可转为每3年复查（片段2、11）。  - 切缘阳性（切缘组织病理学报告CINⅡ及以上）：术后4-6个月复查细胞学、阴道镜和ECC（片段2、4）。根据复查结果，按相应级别病变处理（例如，可能需要进一步手术或强化随访）（片段4）。  - 随访频率：高风险患者（如切缘阳性、淋巴结阳性等）术后2年内每3个月随访一次；低风险患者每6个月一次（片段12）。随访内容包括细胞学检查、HPV检测、阴道镜评估等（片段11）。  - 依据：片段2详细说明“经过质量控制的术后病理诊断若切缘存在 HSIL 病变，建议术后 4～6 月复查并阴道镜评估”；片段4和11补充复查的具体组合。  因此，随访步骤为：术后根据切缘状态，4-6个月后复查细胞学+阴道镜+ECC；之后按风险分级调整频率，并整合HPV检测。 | A | A | A |
| CRAG | 宫颈锥切术后的随访步骤  知识库文档： - 切缘阴性：术后4-6个月复查（细胞学+阴道镜+ECC）。 - 切缘阳性（CINⅡ+）：4-6个月后复查细胞学+阴道镜+ECC，根据结果按病变级别处理。 - 发现可疑浸润癌：立即送病理，确诊后转宫颈癌治疗流程。 - 来源：知识库文档（图5：组织病理学确诊HSIL的处理流程）  网络搜索结果补充： - 切缘阳性需再次锥切确保阴性切缘（>1mm）；切缘阴性者每6个月联合筛查+ECC，持续3年。 - 来源：网络搜索内容（AIS管理部分）  结论：术后4-6个月复查，切缘状态决定后续管理（阴性则常规随访，阳性需强化监测或二次手术）。 | A | A | A |
| Document Augmentation | 宫颈癌诊断性/治疗性宫颈锥切术后，应该进行什么随访步骤？  回答：根据文档片段6：  - 若术后病理切缘阴性：需在4-6个月后复查（细胞学+阴道镜+ECC）。  - 若术后病理切缘阳性（CINⅡ及以上）：同样在4-6个月后复查细胞学、阴道镜和ECC，并根据复查结果按相应级别病变处理。  - 若术中发现可疑浸润癌：立即送病理检查，确诊后转宫颈癌治疗流程。 | A | A | A |
| Fusion RAG | 宫颈癌诊断性/治疗性宫颈锥切术后，应该进行什么随访步骤？  根据文档内容（文档1、文档6、文档7、文档13），诊断性/治疗性宫颈锥切术后的随访步骤取决于术后病理结果：  - 如果术后病理切缘阴性（无CINⅡ及以上病变）：   - 在术后4-6个月复查，包括细胞学检查、阴道镜检查和宫颈管搔刮术（ECC）。   - 如果复查结果正常，后续转为常规筛查（如每3年一次细胞学+HPV联合检测）。  - 如果术后病理切缘阳性（切缘有CINⅡ及以上病变）：   - 在术后4-6个月复查细胞学、阴道镜和ECC。   - 根据复查结果（如病变级别）进行相应处理（例如，重复锥切或转至更高级别病变管理流程）。  - 如果术中发现可疑浸润癌：立即送病理确诊，若确诊则转至宫颈癌治疗流程。  此信息源自文档6的HSIL处理流程和文档7的图5描述，强调根据切缘状态和复查结果个体化随访。 | A | A | A |
| HyDE | 宫颈癌诊断性/治疗性宫颈锥切术后，应该进行什么随访步骤？  答案：根据上下文信息（HyDE相似度0.749和0.505），宫颈锥切术后的随访步骤如下：  1. 术后病理切缘阴性：4-6个月后复查，包括细胞学、阴道镜和ECC。  2. 术后病理切缘阳性（CINⅡ及以上）：4-6个月后复查细胞学、阴道镜和ECC，并根据复查结果按相应病变级别处理。  3. 若术中发现可疑浸润癌：立即送病理确诊，若确诊则转入宫颈癌治疗流程。  - 引用依据："若患者诊断性/治疗性宫颈切除术后病理切缘阴性：4-6月后复查（细胞学+阴道镜+ECC）。若患者诊断性/治疗性宫颈切除术后病理切缘阳性（切缘组织病理学报告CINⅡ及以上）：则应在4-6个月后复查细胞学，阴道镜，ECC"（HyDE相似度0.749）。 | A | B | A |
| Query Transformation | 宫颈癌诊断性/治疗性宫颈锥切术后，应该进行什么随访步骤？  基于文档内容，宫颈癌诊断性/治疗性宫颈锥切术后的随访步骤取决于术后病理结果，特别是切缘状态（是否残留病变）。具体随访步骤如下：  - 如果术后病理切缘阴性（无残留病变，如无CINⅡ及以上病变）：   - 术后4-6个月复查，复查内容包括细胞学检查、阴道镜检查和宫颈管搔刮术（ECC）（来源：文档片段4、文档片段13）。   - 如果复查结果正常，后续可转为常规筛查（如每3年一次细胞学或HPV检测）（来源：文档片段13）。  - 如果术后病理切缘阳性（残留CINⅡ及以上病变）：   - 术后4-6个月复查细胞学检查、阴道镜检查和ECC（来源：文档片段4、文档片段13）。   - 根据复查结果（如病变级别），按相应异常处理流程进行管理（例如，重复切除术或转至更高级别治疗）（来源：文档片段4）。  - 如果术中发现可疑浸润癌：立即送病理检查，确诊后转至宫颈癌治疗流程（来源：文档片段4）。  - 长期随访建议：HSIL治疗后患者应采用细胞学联合HPV检测的方法随访20年，尤其注意前2年内的复发监测（来源：文档片段13）。   关键依据：文档片段4详细描述了“若患者诊断性/治疗性宫颈切除术后病理切缘阴性：4-6月后复查（细胞学+阴道镜+ECC）”和“若病理切缘阳性：则应在4-6个月后复查细胞学，阴道镜，ECC”。文档片段13补充了长期随访策略。 | A | A | A |
| SelfRAG | 宫颈癌诊断性/治疗性宫颈锥切术后，应该进行什么随访步骤？  根据文档内容，诊断性/治疗性宫颈切除术（如LEEP或冷刀锥切）后的随访步骤取决于术后病理切缘状态：  - 如果病理切缘阴性（无CIN II+病变）：应在术后4-6个月进行复查，内容包括细胞学检查、阴道镜检查和宫颈管搔刮术（ECC）。  - 如果病理切缘阳性（切缘组织病理学报告为CIN II及以上）：应在术后4-6个月进行复查，内容包括细胞学检查、阴道镜检查和ECC；复查结果将根据病变级别进行相应处理（如按高级别病变流程管理）。  - 如果术中发现可疑浸润癌：立即送病理检查，确诊后转入宫颈癌治疗流程。  （来源：文档片段中明确描述，例如“若患者诊断性/治疗性宫颈切除术后病理切缘阴性：4-6月后复查（细胞学+阴道镜+ECC）...若患者诊断性/治疗性宫颈切除术后病理切缘阳性...则应在4-6个月后复查细胞学，阴道镜，ECC。”） | A | A | A |
| Semantic Chunking | 宫颈癌诊断性/治疗性宫颈锥切术后，应该进行什么随访步骤？  根据上下文信息（主要来自文档片段8和27）：  - 随访步骤取决于术后病理切缘情况：   - 如果切缘阴性（无CINⅡ及以上病变）：术后4-6个月复查细胞学联合HPV检测、阴道镜评估和宫颈管搔刮术（ECC）。之后根据结果决定后续管理（如连续两次阴性可转为常规筛查）。   - 如果切缘阳性（组织病理学报告CINⅡ及以上病变）：术后4-6个月复查细胞学、阴道镜评估和ECC。根据复查结果按相应病变级别处理（如持续异常需重复切除术或全子宫切除）。  - 总体建议采用细胞学联合HPV检测方法随访20年（高风险患者需更频繁）。  总结步骤：   1. 评估切缘状态。   2. 切缘阴性：4-6个月后复查（细胞学+HPV+阴道镜+ECC）。   3. 切缘阳性：4-6个月后复查（同上），并根据结果升级处理。 | A | A | A |
| NaiveRAG | 宫颈癌诊断性/治疗性宫颈锥切术后，应该进行什么随访步骤？  在文档中，宫颈锥切术（包括诊断性或治疗性）后的随访步骤取决于术后病理切缘的状态。根据上下文（例如相似度0.461的片段），具体随访流程如下：  - 如果术后病理切缘阴性（无CINⅡ及以上病变）：在术后4-6个月进行复查，内容包括细胞学检查、阴道镜检查和宫颈管搔刮术（ECC）。复查结果正常后，可转入常规筛查。  - 如果术后病理切缘阳性（切缘组织病理学报告为CINⅡ及以上）：同样在术后4-6个月进行复查，内容包括细胞学检查、阴道镜检查和ECC。复查结果需根据病变级别（如CIN或浸润癌）进行相应处理（例如，如果复查显示持续HSIL，可能需要重复锥切或子宫切除）。  - 如果术中发现可疑浸润癌：立即送病理确诊，如确诊则转入宫颈癌治疗流程。   此信息基于文档中对宫颈锥切术后管理的详细描述（例如：“若患者诊断性/治疗性宫颈切除术后病理切缘阴性：4-6月后复查（细胞学+阴道镜+ECC）”；“若切缘阳性：则应在4-6个月后复查细胞学，阴道镜，ECC。”）。 | A | A | A |
| Rerank | 宫颈癌诊断性/治疗性宫颈锥切术后，应该进行什么随访步骤？  根据上下文信息（文档片段1和4），宫颈锥切术后的随访步骤取决于术后病理切缘状态： - 切缘阴性（无HSIL病变）：  - 术后4-6个月进行首次复查，包括细胞学检查联合HPV检测、阴道镜评估和宫颈管搔刮术（ECC）（片段1：相关性0.9728；片段4：相关性0.9173）。  - 若首次复查无异常，建议术后6-12个月再次进行细胞学联合HPV检测复查。  - 若连续2次复查未见异常，可转为每3年复查一次，总随访期建议为20年（片段1：相关性0.9728）。 - 切缘阳性（存在HSIL病变，如CINⅡ及以上）：  - 术后4-6个月进行复查，包括细胞学检查、阴道镜评估和ECC（片段1：相关性0.9728；片段4：相关性0.9173）。  - 根据复查结果，按相应级别病变处理（如重复切除术或全子宫切除术）。 - 一般原则：所有HSIL治疗后患者均建议采用细胞学联合HPV检测的方法随访20年，以监测复发（片段1：相关性0.9728）。  此随访计划基于术后复发风险，切缘状态是关键决定因素。  # | A | A | A |
| RSE | 宫颈癌诊断性/治疗性宫颈锥切术后，应该进行什么随访步骤？  根据上下文信息（相关片段 1 和 相关片段 3），诊断性/治疗性宫颈切除术（包括锥切术）后的随访步骤如下：  - 如果术后病理切缘阴性（无CINⅡ及以上病变）：   - 术后4-6个月复查，内容包括细胞学检查、阴道镜检查及宫颈管搔刮（ECC）。   - 如果复查无异常，后续建议采用细胞学联合HPV检测的方法随访20年；具体为术后6-12个月复查细胞学联合HPV检测，若未发现病变持续存在，则12个月后再次复查，连续2次检查未见异常后，可每3年复查一次。  - 如果术后病理切缘阳性（切缘组织病理学报告为CINⅡ及以上）：   - 术后4-6个月复查细胞学检查、阴道镜检查及ECC。   - 根据复查结果，按照相应级别病变（如CIN或浸润癌）进行处理。  - 如果术中发现可疑浸润癌：立即送病理检查，确诊后转宫颈癌治疗流程。  此信息基于相关片段 1（普通患者处理流程）和相关片段 3（HSIL治疗后随访部分）。 | A | A | A |
| Non-RAG strategy | 宫颈癌诊断性/治疗性宫颈锥切术后，应该进行什么随访步骤？  宫颈锥切术（如LEEP或冷刀锥切）后的随访步骤包括： - 初始随访：在术后6-12个月开始进行HPV检测和细胞学联合筛查（co-testing）。如果切缘阴性且无残留病变，推荐每12个月进行一次联合检测。 - 高风险情况：如果切缘阳性或存在高级别病变（如HSIL），需更密切随访，例如每6个月进行一次联合检测，或在3-6个月内重复阴道镜检查；必要时考虑重复锥切或进一步治疗。 - 长期随访：持续监测至少20年，根据个体风险调整频率（如从每年过渡到每3-5年）。目标是早期发现复发或残留病变。 | B | B | B |
| **Question 33: 在宫颈癌筛查中，如果妊娠患者组织病理学确认（活检）为HSIL，妊娠期间无浸润性癌症，分娩后应该进行什么随访步骤？** | | | | |
| Context Enrichment | 在宫颈癌筛查中，如果妊娠患者组织病理学确认（活检）为HSIL，妊娠期间无浸润性癌症，分娩后应该进行什么随访步骤？  基于文档内容（例如，相似度0.588的片段和相似度0.461的片段）：  - 妊娠期间确诊HSIL且无浸润癌的患者，分娩后应在产后6-8周进行复查，包括细胞学检查、阴道镜检查和ECC。  - 复查结果决定后续步骤：   - 如果产后复查无CINⅡ+（即无高级别病变），患者转为常规宫颈癌筛查。   - 如果产后复查出现CINII+，则进行诊断性/治疗性宫颈切除术，并按前述流程处理（如问题32所述）。  总结随访步骤：产后6-8周复查（细胞学 + 阴道镜 + ECC） → 若无CINⅡ+则常规筛查；若有CINII+则行宫颈切除术。 | A | A | A |
| Contextual Chunk Headers | 在宫颈癌筛查中，如果妊娠患者组织病理学确认（活检）为HSIL，妊娠期间无浸润性癌症，分娩后应该进行什么随访步骤？  根据文档片段1（块主题：妊娠期宫颈癌筛查流程）、片段3（块主题：HSIL处理原则）和片段12（块主题：HSIL管理与治疗指南）： - 随访步骤：分娩后6-8周进行复查，包括细胞学检查、阴道镜检查和ECC。  - 复查结果无CINⅡ或更高级别病变：后续转为常规宫颈癌筛查。  - 复查结果出现CINⅡ或更高级别病变：应进行诊断性/治疗性宫颈切除术，并按标准流程处理。 - 依据：文档片段1明确："产后6-8周复查（细胞学+阴道镜+ECC）。若产后复查无CINⅡ+患者后续应进行常规筛查；若产后复查出现CINII+→则应进行诊断性/治疗性宫颈切除术"。片段3和片段12重申此产后管理流程。  # | A | A | A |
| Context Compression | 在宫颈癌筛查中，如果妊娠患者组织病理学确认（活检）为HSIL，妊娠期间无浸润性癌症，分娩后应该进行什么随访步骤？  基于文档内容，妊娠期HSIL患者（无浸润癌）分娩后的随访步骤集中在产后6-8周的复查，并根据结果决定后续管理。相关文档片段（片段1、2、3、5、8）指出：  - 产后复查时间：产后6-8周进行（片段1、2、3、5、8）。  - 复查内容：包括细胞学检查+阴道镜检查+ECC（宫颈管刮术）（片段1、2）。  - 后续处理：   - 若复查无CINⅡ及以上病变（即无高级别病变），患者应转为常规宫颈癌筛查（片段1、8）。   - 若复查出现CINⅡ及以上病变，则进行诊断性或治疗性宫颈切除术，并按标准流程处理（片段1、2）。  - 依据：片段1明确说明“产后6-8周复查（细胞学+阴道镜+ECC）。若未发现CINⅡ+患者后续应进行常规筛查；若产后复查出现CINII+→则应进行诊断性/治疗性宫颈切除术”；片段3和5支持产后6-8周复查的时机。  因此，随访步骤为：分娩后6-8周进行细胞学+阴道镜+ECC复查；根据结果，若无高级别病变则转常规筛查，若有则行宫颈切除术。 | A | A | A |
| CRAG | 妊娠期HSIL患者产后随访步骤  知识库文档： - 产后6-8周复查（细胞学+阴道镜+ECC）：  - 若无CINⅡ+，转为常规筛查。  - 若发现CINⅡ+，行诊断性/治疗性宫颈切除术。 - 来源：知识库文档（妊娠期患者管理部分）  网络搜索结果补充： - 产后复查异常者按标准流程处理，无异常则常规筛查。 - 来源：网络搜索内容（"HSIL妊娠期妇女"部分）  结论：产后6-8周全面复查，根据结果决定是否手术或常规筛查。 | A | A | A |
| Document Augmentation | 在宫颈癌筛查中，如果妊娠患者组织病理学确认（活检）为HSIL，妊娠期间无浸润性癌症，分娩后应该进行什么随访步骤？  回答：根据文档片段1和片段6，产后6-8周需进行复查（细胞学+阴道镜+ECC）：  - 若复查无CINⅡ+：患者后续转为常规筛查。  - 若复查出现CINⅡ+：则需行诊断性/治疗性宫颈切除术，后续流程同前述（片段1："产后6-8周复查...若产后复查无CINⅡ+患者后续应进行常规筛查；若产后复查出现CINII+→则应进行诊断性/治疗性宫颈切除术"）。 | A | A | A |
| Fusion RAG | 在宫颈癌筛查中，如果妊娠患者组织病理学确认（活检）为HSIL，妊娠期间无浸润性癌症，分娩后应该进行什么随访步骤？  根据文档内容（文档1、文档6、文档7、文档11、文档13），妊娠患者确诊HSIL且妊娠期间无浸润癌时，分娩后的随访步骤如下：   - 产后6-8周进行复查：包括细胞学检查、阴道镜检查和宫颈管搔刮术（ECC）。  - 复查结果处理：   - 如果复查无CINⅡ及以上病变（即无进展或消退），患者后续转为常规宫颈癌筛查（如每3年一次细胞学+HPV检测）。   - 如果复查出现CINⅡ及以上病变，则进行诊断性/治疗性宫颈切除术，并遵循术后随访流程（如问题32所述）。  此流程在文档1中明确提到：“若未发现浸润癌，则应推迟至产后6-8周复查（细胞学+阴道镜+ECC）”，并在文档6和文档11中重复强调。 | B | A | A |
| HyDE | 在宫颈癌筛查中，如果妊娠患者组织病理学确认（活检）为HSIL，妊娠期间无浸润性癌症，分娩后应该进行什么随访步骤？  答案：根据上下文信息（HyDE相似度0.749和0.475），分娩后随访步骤如下：  1. 产后6-8周复查：进行细胞学、阴道镜和ECC检查。  2. 复查结果处理：  - 若无CINⅡ+病变，转为常规筛查。  - 若发现CINⅡ+病变，行诊断性/治疗性宫颈切除术，后续按标准流程处理。  - 引用依据："产后6-8周复查（细胞学+阴道镜+ECC）。-若产后复查无CINⅡ+患者后续应进行常规筛查 -若产后复查出现CINII+→则应进行诊断性/治疗性宫颈切除术，后续流程如前所述"（HyDE相似度0.749）。 | A | A | A |
| Query Transformation | 在宫颈癌筛查中，如果妊娠患者组织病理学确认（活检）为HSIL，妊娠期间无浸润性癌症，分娩后应该进行什么随访步骤？  基于文档内容，妊娠患者组织病理学确诊为HSIL，且妊娠期间未发现浸润癌时，分娩后的随访步骤是标准化的：  - 产后复查时间：分娩后6-8周进行复查（来源：文档片段1、文档片段4、文档片段9、文档片段13）。  - 复查内容：包括细胞学检查、阴道镜检查和宫颈管搔刮术（ECC），以评估病变状态（来源：文档片段1、文档片段4）。  - 复查结果处理：   - 如果复查未发现CINⅡ及以上病变（即无进展或残留），患者后续应转为常规宫颈癌筛查（如每3年一次筛查）（来源：文档片段1、文档片段4）。   - 如果复查发现CINⅡ及以上病变，则应按相应级别进行管理（如行诊断性/治疗性宫颈切除术）（来源：文档片段1）。   关键依据：文档片段1明确指出“若未发现浸润癌，则应推迟至产后6-8周复查（细胞学+阴道镜+ECC）”。文档片段4和文档片段13也重复了这一产后管理流程。 | A | A | A |
| SelfRAG | 在宫颈癌筛查中，如果妊娠患者组织病理学确认（活检）为HSIL，妊娠期间无浸润性癌症，分娩后应该进行什么随访步骤？  根据文档内容，对于妊娠患者确诊HSIL且妊娠期间无浸润癌的情况，分娩后随访步骤如下：  - 在产后6-8周进行复查，内容包括细胞学检查、阴道镜检查和宫颈管搔刮术（ECC）。  - 如果产后复查未发现CIN II+病变：患者后续应转为常规宫颈癌筛查。  - 如果产后复查发现CIN II+病变：患者应进行诊断性/治疗性宫颈切除术，后续流程按问题32所述的术后随访步骤处理。  （来源：文档片段中明确说明，例如“若未发现浸润癌，则应推迟至产后6-8周复查（细胞学+阴道镜+ECC）。-若产后复查无CINⅡ+患者后续应进行常规筛查 -若产后复查出现CINII+→则应进行诊断性/治疗性宫颈切除术，后续流程如前所述。”） | A | A | A |
| Semantic Chunking | 在宫颈癌筛查中，如果妊娠患者组织病理学确认（活检）为HSIL，妊娠期间无浸润性癌症，分娩后应该进行什么随访步骤？  根据上下文信息（主要来自文档片段1、2、8和27）：  - 分娩后需在产后6-8周进行复查。  - 复查内容包括：细胞学检查、阴道镜评估和宫颈管搔刮术（ECC）。  - 如果复查未发现CINⅡ及以上病变（即“无CINⅡ+”），则转为常规筛查；如果发现CINⅡ及以上病变（即“出现CINII+”），则进行诊断性/治疗性宫颈切除术。  总结步骤：   1. 产后6-8周安排复查。   2. 执行细胞学+阴道镜+ECC检查。   3. 根据结果决定后续管理（正常转常规筛查；异常转宫颈切除术）。 | A | A | A |
| NaiveRAG | 在宫颈癌筛查中，如果妊娠患者组织病理学确认（活检）为HSIL，妊娠期间无浸润性癌症，分娩后应该进行什么随访步骤？  在文档中，针对妊娠期HSIL患者（妊娠期间无浸润癌）的分娩后随访，提供了明确步骤。根据上下文（例如相似度0.461和0.439的片段），产后随访旨在评估病变是否消退或进展：  - 分娩后6-8周：进行复查，内容包括细胞学检查、阴道镜检查和宫颈管搔刮术（ECC）。  - 复查结果处理：   - 如果复查未发现CINⅡ及以上病变（即无异常），患者后续应转为常规宫颈癌筛查（例如每3-5年进行一次细胞学或HPV检测）。   - 如果复查发现CINⅡ及以上病变（如持续HSIL），则应按相应级别病变处理（例如行诊断性/治疗性宫颈切除术）。  - 特殊说明：妊娠期HSIL患者产后病变可能自然消退，因此产后复查是关键；如果妊娠期间已进行监测且无进展，产后复查是标准流程。   此信息基于文档中的产后管理描述（例如：“产后6-8周进行复查。若复查出现异常，则应该按照异常处理流程进行处理。若复查并未发现CIN，则患者后续应转为常规筛查。”）。 | A | A | A |
| Rerank | 在宫颈癌筛查中，如果妊娠患者组织病理学确认（活检）为HSIL，妊娠期间无浸润性癌症，分娩后应该进行什么随访步骤？  根据上下文信息（文档片段3、4和6），妊娠患者HSIL确诊且妊娠期间无浸润癌，分娩后随访步骤如下： - 产后6-8周进行复查：包括细胞学检查、阴道镜评估和宫颈管搔刮术（ECC）（片段3：相关性0.9232；片段4：相关性0.9173；片段6：相关性0.8574）。 - 复查结果处理：  - 若复查无CINⅡ及以上病变（即无异常），转为常规宫颈癌筛查（如每3-5年一次细胞学或HPV检测）（片段4：相关性0.9173）。  - 若复查发现CINⅡ及以上病变，则按相应流程处理，如行诊断性/治疗性宫颈切除术（片段4：相关性0.9173）。 - 依据：产后复查旨在评估妊娠期生理变化消退后的真实病变状态，避免漏诊。  # | B | A | A |
| RSE | 在宫颈癌筛查中，如果妊娠患者组织病理学确认（活检）为HSIL，妊娠期间无浸润性癌症，分娩后应该进行什么随访步骤？  根据上下文信息（相关片段 1 和 相关片段 3），对于妊娠患者组织病理学确诊为HSIL且妊娠期间无浸润癌的情况，分娩后的随访步骤如下：  - 在产后6-8周进行复查，内容包括细胞学检查、阴道镜检查及宫颈管搔刮（ECC）。  - 如果产后复查无CINⅡ及以上病变：患者后续应进行常规宫颈癌筛查。  - 如果产后复查发现CINⅡ及以上病变：则应立即进行诊断性/治疗性宫颈切除术，术后随访流程如前所述（参考问题32的答案）。  此信息基于相关片段 1（特殊人群中的妊娠期患者部分）和相关片段 3（组织病理学确诊的HSIL管理原则）。 | A | A | A |
| Non-RAG strategy | 在宫颈癌筛查中，如果妊娠患者组织病理学确认（活检）为HSIL，妊娠期间无浸润性癌症，分娩后应该进行什么随访步骤？  对于妊娠期确诊HSIL且无浸润性癌的患者，分娩后随访步骤包括： - 产后评估：在分娩后6-8周进行阴道镜检查和定向活检，以重新评估病变状态（因妊娠期变化可能影响诊断）。 - 后续管理：如果活检确认HSIL持续存在，推荐在产后进行宫颈锥切术（如LEEP）以明确诊断和治疗；如果病变消退，可转为常规筛查（如HPV检测或细胞学检查）。 - 随访频率：产后初始评估后，根据结果制定个体化计划，通常每6-12个月进行一次筛查，直至病变稳定或消退。 | B | A | A |
| **Question 34: HPV疫苗使用策略是什么？不同年龄组推荐的疫苗接种方案是什么？** | | | | |
| Context Enrichment | HPV疫苗使用策略是什么？不同年龄组推荐的疫苗接种方案是什么？  基于文档内容（例如，相似度0.588的片段和相似度0.509的片段）：  - HPV疫苗使用策略：   - 疫苗主要用于一级预防宫颈癌，针对HPV感染（主要通过性生活传播）。   - 重点针对开始性活动之前的女性，尤其是10-14岁女孩；男孩也可接种。   - 疫苗类型包括二价（针对HPV16和18）、四价（针对HPV16、18、6和11）和九价（针对HPV6、11、16、18、31、33、45、52、58），均由病毒样颗粒（VLPs）组成，无传染性。   - WHO数据显示HPV疫苗安全性良好。  - 不同年龄组推荐方案：   - 9-14岁女孩和男孩：建议2针方案（0.5mL，第0个月和第5-13个月注射）。如果第二针在第一针后5个月内注射，则需加用第3针。   - 15岁以上人群和免疫力低下者（无论年龄）：建议3针方案（0.5mL，第0、1和6个月注射）。  总结：策略是预防性接种，年龄组方案基于免疫应答：9-14岁用2针，15岁以上用3针。 | A | A | A |
| Contextual Chunk Headers | HPV疫苗使用策略是什么？不同年龄组推荐的疫苗接种方案是什么？  根据文档片段1（块主题：宫颈癌的一级预防）和片段2（块主题：HPV疫苗接种与宫颈癌筛查）： - 疫苗使用策略：HPV疫苗作为一级预防措施，重点针对性活动开始前的女性，尤其是10-14岁女孩。目标是预防HPV感染及相关癌前病变和癌症。目前有三种疫苗：二价（针对HPV16/18）、四价（针对HPV6/11/16/18）和九价（针对HPV6/11/16/18/31/33/45/52/58），均由病毒样颗粒组成，无传染性。 - 不同年龄组推荐方案：  - 9-14岁人群（包括女孩和男孩）：推荐2针方案，注射间隔为0和5-13个月。如果第二针在第一针后5个月内注射，建议加用第三针。  - 15岁以上人群及免疫力低下者（无论年龄）：推荐3针方案，注射间隔为0、1和6个月。 - 依据：文档片段1说明："对于9~14岁的女孩和男孩，建议使用2针方案（0和5～13个月）。如果第二针是在第一针之后5个月内注射者，则建议加用第3针。对于15岁以上和免疫力低下的人，则无论年龄大小，建议使用3针方案（0.5mL,0,1,6个月）"。  # | A | A | A |
| Context Compression | HPV疫苗使用策略是什么？不同年龄组推荐的疫苗接种方案是什么？  基于文档内容，HPV疫苗使用策略针对不同年龄组有明确方案，但文档仅片段7提供相关信息：  - 总体策略：HPV疫苗接种方案根据年龄和免疫状态调整，以预防HPV感染和相关疾病（片段7）。  - 不同年龄组方案：   - 9～14岁（女孩和男孩）：推荐2针方案，剂量为0.5mL，注射时间点为第0个月和第5-13个月。如果第二针在第一针后5个月内注射，则建议加用第三针（片段7）。   - 15岁以上及免疫力低下人群（无论年龄）：推荐3针方案，剂量为0.5mL，注射时间点为第0、1和6个月（片段7）。  - 依据：片段7明确指出“对于9～14岁的女孩和男孩，建议使用2针方案...对于15岁以上和免疫力低下的人，则无论年龄大小，建议使用3针方案”。  因此，HPV疫苗策略为：9-14岁用2针（间隔5-13个月），15岁以上或免疫力低下用3针（间隔0、1、6个月）；若第二针过早注射（<5个月），需补第三针。 | B | A | A |
| CRAG | HPV疫苗接种策略及年龄组方案  知识库文档： - 9-14岁：2剂方案（0、5-13个月）。 - ≥15岁及免疫低下者：3剂方案（0、1、6个月）。 - 来源：知识库文档（1.1宫颈癌一级预防）  网络搜索结果补充： - WHO最新建议（2022年）：  - 9-14岁女孩：单剂或双剂（首选）。  - 15-20岁女性：单剂或双剂。  - ≥21岁女性：双剂（间隔6个月）。  - 免疫低下者：三剂（优先）或双剂。 - 中国推荐：  - 优先9-26岁女性（重点9-14岁），27-45岁有条件接种。  - 国产二价疫苗性价比最优（广东经济学评估）。 - 来源：网络搜索内容（WHO建议、单剂次HPV疫苗评估联盟、地方经济学研究）  矛盾点分析：  知识库的2剂/3剂方案与WHO单剂建议存在差异，源于新证据（2020年后单剂效力研究）。临床应优先采用WHO最新指南。 | A | A | A |
| Document Augmentation | HPV疫苗使用策略是什么？不同年龄组推荐的疫苗接种方案是什么？  回答：根据文档片段1和片段3：  - 疫苗策略：重点针对开始性活动前女性，尤其是10-14岁女孩。提供二价（HPV16/18）、四价（HPV6/11/16/18）和九价（HPV6/11/16/18/31/33/45/52/58）疫苗，均为无传染性的病毒样颗粒重组疫苗。  - 接种方案：  - 9-14岁青少年：2针方案（第0、5-13个月）。  - 15岁以上及免疫力低下者：3针方案（第0、1、6个月）。  - 安全性：WHO数据显示无安全性问题（片段1："对于9-14岁的女孩和男孩，建议使用2针方案"；片段3："对于15岁以上和免疫力低下的人...建议使用3针方案"）。 | A | A | A |
| Fusion RAG | HPV疫苗使用策略是什么？不同年龄组推荐的疫苗接种方案是什么？  根据文档内容（文档1和文档2），HPV疫苗使用策略重点针对性活动开始前的青少年，以预防HPV感染和相关癌前病变。不同年龄组的接种方案如下：  - 9-14岁人群（包括女孩和男孩）：   - 推荐2针方案：第一针（0.5mL）在起始时注射，第二针（0.5mL）在5-13个月后注射。   - 如果第二针在第一针后5个月内注射，则需加用第三针（即转为3针方案）。  - 15岁以上人群及免疫力低下者（无论年龄）：   - 推荐3针方案：第一针（0.5mL）在起始时注射，第二针（0.5mL）在1个月后注射，第三针（0.5mL）在6个月后注射（即0、1、6个月间隔）。  疫苗类型包括二价（针对HPV16/18）、四价（针对HPV16/18/6/11）和九价（针对更多型别），均由病毒样颗粒（VLPs）组成，无传染性。WHO数据显示HPV疫苗安全性良好。此信息源自文档1的“宫颈癌的一级预防”部分和文档2的补充说明。 | A | A | A |
| HyDE | HPV疫苗使用策略是什么？不同年龄组推荐的疫苗接种方案是什么？  答案：根据上下文信息（HyDE相似度0.607），HPV疫苗策略和接种方案如下：  1. 疫苗类型：二价（针对HPV16/18）、四价（针对HPV6/11/16/18）、九价（针对HPV6/11/16/18/31/33/45/52/58）。  2. 接种方案：  - 9-14岁人群：2针方案（0和5-13个月），若第二针在第一针后5个月内注射，需加第三针。  - 15岁以上及免疫力低下者：3针方案（0、1、6个月）。  3. 重点人群：优先针对10-14岁女孩，在性活动开始前接种。  - 引用依据："对于$9 \sim 1 4$ 岁的女孩和男孩，建议使用 2 针方案（0.5$\mathrm { \ m L , 0 }$ 和5～13 个月）。如果第二针是在第一针之后5个月内注射者，则建议加用第3针。对于15岁以上和免疫力低下的人，则无论年龄大小，建议使用3 针方案 $( 0 . 5 \mathrm { m L } , 0 , 1 , 6$ 个月）"（HyDE相似度0.607）。 | C | B | B |
| Query Transformation | HPV疫苗使用策略是什么？不同年龄组推荐的疫苗接种方案是什么？  基于文档内容，HPV疫苗使用策略侧重于预防宫颈癌，重点针对性活动开始前的年轻人群，以最大化保护效果。不同年龄组的推荐疫苗接种方案如下：  - 整体策略：   - HPV疫苗作为一级预防措施，主要针对HPV感染高峰前的青少年，尤其是女孩。目标是预防HPV相关癌前病变和癌症（来源：文档片段1）。   - 可用的疫苗包括二价（针对HPV16/18）、四价（针对HPV16/18/6/11）和九价（针对HPV6/11/16/18/31/33/45/52/58），均由病毒样颗粒（VLPs）组成，无传染性（来源：文档片段1）。  - 不同年龄组推荐方案：   - 9-14岁人群（包括女孩和男孩）：推荐2针方案，接种间隔为0个月（第一针）和5-13个月（第二针）。如果第二针在第一针后5个月内接种，建议加用第3针（来源：文档片段1、文档片段3）。   - 15岁以上人群及免疫力低下者（无论年龄）：推荐3针方案，接种间隔为0个月（第一针）、1个月（第二针）和6个月（第三针）（来源：文档片段1、文档片段3）。  - 安全性：WHO数据显示HPV疫苗不存在安全性问题（来源：文档片段1）。   关键依据：文档片段1详细描述了“对于9~14岁的女孩和男孩，建议使用2针方案（0和5～13个月）。如果第二针是在第一针之后5个月内注射者，则建议加用第3针。对于15岁以上和免疫力低下的人，则无论年龄大小，建议使用3针方案（0.5mL, 0, 1, 6个月）”。 | A | A | A |
| SelfRAG | HPV疫苗使用策略是什么？不同年龄组推荐的疫苗接种方案是什么？  根据文档内容，HPV疫苗使用策略和不同年龄组的推荐方案如下：  - 总体策略：HPV疫苗作为一级预防措施，重点针对开始性活动之前的女性，尤其是10-14岁女孩。疫苗可预防HPV感染及相关癌前病变和癌症。目前有三种疫苗：二价（针对HPV 16和18）、四价（针对HPV 6、11、16、18）和九价（针对HPV 6、11、16、18、31、33、45、52、58）。所有疫苗均为重组病毒样颗粒（VLPs），无传染性。  - 不同年龄组推荐方案：   - 9-14岁人群（包括男孩和女孩）：建议使用2针方案，剂量为0.5 mL，注射间隔为第一针后0个月和第二针后5-13个月。如果第二针在第一针后5个月内注射，则建议加用第三针。   - 15岁以上人群或免疫力低下者（无论年龄）：建议使用3针方案，剂量为0.5 mL，注射间隔为0、1和6个月。  （来源：文档片段中详细描述，例如“对于$9 \sim 1 4$ 岁的女孩和男孩，建议使用 2 针方案（0.5$\mathrm { \ m L , 0 }$ 和5～13 个月）...对于15岁以上和免疫力低下的人，则无论年龄大小，建议使用3 针方案 $( 0 . 5 \mathrm { m L } , 0 , 1 , 6$ 个月）。”） | A | A | A |
| Semantic Chunking | HPV疫苗使用策略是什么？不同年龄组推荐的疫苗接种方案是什么？  根据上下文信息（来自文档片段1）：  - HPV疫苗使用策略：预防性HPV疫苗接种应重点针对开始性活动之前的女性群体，尤其是10～14岁女孩。目标是预防HPV感染和相关癌前病变及癌症。目前有三种疫苗类型：二价（针对HPV16/18）、四价（针对HPV16/18/6/11）和九价（针对更多高危型别）。所有疫苗均为重组病毒样颗粒（VLPs），无传染性。WHO数据显示不存在安全性问题。  - 不同年龄组推荐方案：   - 9～14岁人群（包括女孩和男孩）：推荐2针方案（剂量0.5mL），注射间隔为0个月和5～13个月。如果第二针在第一针后5个月内注射，需加用第三针。   - 15岁以上人群及免疫力低下者（无论年龄）：推荐3针方案（剂量0.5mL），注射间隔为0、1和6个月。  总结：策略强调早期接种；方案基于年龄和免疫状态区分。 | A | A | A |
| NaiveRAG | HPV疫苗使用策略是什么？不同年龄组推荐的疫苗接种方案是什么？  在文档中，HPV疫苗的使用策略和不同年龄组的接种方案有详细说明。根据上下文（例如相似度0.588和0.509的片段），策略重点针对性活动前的青少年，以预防HPV感染和宫颈癌：  - HPV疫苗使用策略：   - 作为宫颈癌一级预防，重点针对开始性活动之前的女性，尤其是10-14岁女孩。   - 疫苗类型包括二价（针对HPV16和18）、四价（针对HPV16、18、6和11）和九价（针对HPV6、11、16、18、31、33、45、52、58）。这些疫苗由病毒样颗粒（VLPs）组成，无传染性。   - WHO数据显示HPV疫苗安全性良好。  - 不同年龄组推荐的疫苗接种方案：   - 9-14岁的儿童（包括女孩和男孩）：推荐使用2针方案，注射时间点为第0个月和第5-13个月（例如，间隔5-13个月）。如果第二针在第一针后5个月内注射，建议加用第三针。   - 15岁以上人群及免疫力低下者（无论年龄）：推荐使用3针方案，注射时间点为第0、1和6个月（例如，0.5mL剂量）。  - 总体原则：疫苗接种应在性活动开始前完成，以最大化预防效果。   此信息基于文档中对HPV疫苗的专门描述（例如：“对于9~14岁的女孩和男孩，建议使用2针方案（0.5mL, 0和5～13个月）。...对于15岁以上和免疫力低下的人，则无论年龄大小，建议使用3针方案（0.5mL, 0,1,6个月）。”）。 | A | A | A |
| Rerank | HPV疫苗使用策略是什么？不同年龄组推荐的疫苗接种方案是什么？  根据上下文信息（文档片段3和11），HPV疫苗使用策略和不同年龄组接种方案如下： - 整体策略：HPV疫苗作为宫颈癌一级预防，重点针对开始性活动前的女性，尤其是9-14岁青少年。疫苗类型包括二价（针对HPV16/18）、四价（针对HPV6/11/16/18）和九价（针对更多高危型别），均由病毒样颗粒组成，无传染性（片段3：相关性0.9232；片段11：相关性0.7630）。 - 年龄组推荐方案：  - 9-14岁青少年（女孩和男孩）：推荐2针方案，注射时间为第0个月和第5-13个月。如果第二针在第一针后5个月内注射，需加用第三针（片段3：相关性0.9232；片段11：相关性0.7630）。  - 15岁以上人群及免疫力低下者：无论年龄，均推荐3针方案，注射时间为第0、1和6个月（片段3：相关性0.9232；片段11：相关性0.7630）。 - 依据：此策略基于WHO数据，2针方案在低年龄组免疫效果良好，3针方案适用于高年龄组和免疫缺陷者以确保保护力。  # | B | A | A |
| RSE | HPV疫苗使用策略是什么？不同年龄组推荐的疫苗接种方案是什么？  根据上下文信息（相关片段 1），HPV疫苗使用策略和不同年龄组的推荐方案如下：  - HPV疫苗使用策略：作为宫颈癌一级预防措施，重点针对开始性活动之前的女性，尤其是10-14岁的女孩。疫苗主要用于预防HPV感染，从而降低宫颈癌前病变和癌症风险。目前可用的疫苗包括二价（针对HPV16和18）、四价（针对HPV16、18、6和11）和九价（针对HPV6、11、16、18、31、33、45、52、58），均由病毒样颗粒（VLPs）组成，无传染性。  - 不同年龄组推荐的疫苗接种方案：   - 9-14岁的女孩和男孩：建议使用2针方案（剂量0.5 mL），第一针和第二针间隔5-13个月。如果第二针在第一针后5个月内注射，则需加用第三针。   - 15岁以上人群及免疫力低下者（无论年龄）：建议使用3针方案（剂量0.5 mL），注射时间点为0、1、6个月。  此信息基于相关片段 1（宫颈癌一级预防部分）。 | A | A | A |
| Non-RAG strategy | HPV疫苗使用策略是什么？不同年龄组推荐的疫苗接种方案是什么？  HPV疫苗使用策略和年龄组方案如下： - 总体策略：HPV疫苗用于预防HPV感染和相关宫颈癌，优先推荐青少年女性作为主要目标群体。疫苗接种应结合宫颈癌筛查，作为二级预防补充。 - 不同年龄组方案：  - 9-14岁：推荐接种2剂疫苗（二价、四价或九价），剂次间隔6个月（如0和6个月）。此方案基于免疫原性高且成本效益好。  - 15-45岁：推荐接种3剂疫苗，剂次间隔为0、1-2和6个月（例如0、2、6个月）。对于26岁以上女性，疫苗效果可能降低，但仍推荐用于未感染者。 - 注意事项：疫苗选择取决于可用性（九价疫苗覆盖更多HPV型别），但所有类型均有效。接种应在性行为开始前进行，以最大化保护。 | B | A | A |
| **Question 35: HPV初筛是否适用于低收入国家？如果是，为什么？** | | | | |
| Context Enrichment | HPV初筛是否适用于低收入国家？如果是，为什么？  基于文档内容（例如，相似度0.509的片段）：  - 是，HPV初筛适用于低收入国家。  - 原因：   - HPV检测具有更高的敏感性和阴性预测值，允许延长筛查间隔（例如，一生可仅筛查1次），这在资源有限地区更可行。   - 它简单、准确、可接受，且成本效益高，适合最高危女性（如撒哈拉以南非洲地区已广泛实施）。   - 文档指出，HPV初筛比传统方法（如细胞学）更高效，能提高筛查覆盖率，并与其他方法（如醋酸肉眼观察）结合，实现因地制宜的筛查策略。  总结：适用，因为高效、敏感、间隔长，适合资源匮乏环境。 | A | A | A |
| Contextual Chunk Headers | HPV初筛是否适用于低收入国家？如果是，为什么？  根据文档片段2（块主题：HPV疫苗接种与宫颈癌筛查）和片段25（块主题：宫颈癌筛查现状与挑战）： - 是否适用：是，HPV初筛适用于低收入国家。 - 原因：  - 高敏感性和阴性预测值：HPV检测作为初筛方法比传统细胞学检查更敏感，能更准确地识别高风险人群，并允许延长筛查间隔（如每5年一次），甚至在某些情况下一生仅需筛查一次，这降低了资源需求。  - 成本效益和可行性：在资源有限地区，HPV初筛结合醋酸染色肉眼观察（VIA）等方法更简单、易行。VIA已在撒哈拉以南非洲等低收入国家广泛实施，因其操作简便、设备要求低。  - 适应性强：指南强调不同国家应选择"因地制宜"的筛查策略，优先考虑"可行、简单、准确、可接受、最高危女性容易使用"的原则，HPV初筛符合这些标准。 - 依据：文档片段2指出："许多医疗保健系统正开始改用HPV初筛。这种筛查具有更高的敏感性和阴性预测值，允许延长筛查间隔，甚至在低收入国家，一生可仅筛查1次。VIA在撒哈拉非洲以南的低收入国家已广泛实施"。片段25补充："HPV检测及醋酸肉眼试验用于贫困地区的筛查具有更高效率"。 | A | A | A |
| Context Compression | HPV初筛是否适用于低收入国家？如果是，为什么？  基于文档内容，HPV初筛（即以HPV检测作为初步筛查方法）适用于低收入国家，原因在于其高效率和成本效益。相关文档片段（片段7、25）提供支持：  - 是否适用：是，HPV初筛适用于低收入国家（片段7、25）。  - 原因：   - HPV初筛具有更高的敏感性和阴性预测值，允许延长筛查间隔，减少筛查频率（片段7）。   - 在低收入或贫困地区，HPV检测（结合醋酸肉眼试验）可实现高效筛查，甚至一生仅需筛查一次，这降低了资源需求并提高了可及性（片段7、25）。  - 依据：片段7明确说明“HPV初筛具有更高的敏感性和阴性预测值，允许延长筛查间隔，甚至在低收入国家，一生可仅筛查1次”；片段25补充“HPV检测及醋酸肉眼试验用于贫困地区的筛查具有更高效率”。  因此，HPV初筛适用于低收入国家，因为它高效、敏感，且能减少筛查次数，适合资源有限的环境。 | A | A | A |
| CRAG | HPV初筛在低收入国家的适用性及原因  知识库文档： - 适用原因：  1. 更高敏感性和阴性预测值：降低漏诊率，允许延长筛查间隔（如一生仅筛查1次）。  2. 成本效益：适合资源匮乏地区，VIA（醋酸肉眼观察）已广泛用于撒哈拉以南非洲。 - 来源：知识库文档（1.2宫颈癌二级预防）  网络搜索结果补充： - WHO推荐：HPV核酸检测为首选初筛方法，尤其适用于资源有限地区。 - 中国实践：不具备HPV检测条件时可用细胞学，但HPV初筛是趋势。 - 来源：网络搜索内容（筛查指南、低收入国家策略）  结论：适用，因高敏感性、低成本和可简化筛查流程。    关键说明 - 信息整合：所有回答综合了知识库（20份）与网络搜索（10份）内容，冲突处已标注（如HPV疫苗剂次）。 - 未覆盖问题：无未回答问题，所有内容均基于提供资料。  如后续有细节追问，可进一步解析具体数据或流程。 | A | A | A |
| Document Augmentation | HPV初筛是否适用于低收入国家？如果是，为什么？  回答：是，适用于低收入国家。根据文档片段3：  - 原因：HPV初筛具有更高的敏感性和阴性预测值，允许延长筛查间隔（甚至一生仅筛查1次）。在资源有限地区（如撒哈拉以南非洲），醋酸染色肉眼观察（VIA）已被广泛应用，因其简单、可行、成本低，符合"因地制宜"原则（片段3："在低收入国家，一生可仅筛查1次...VIA在撒哈拉非洲以南的低收入国家已广泛实施"）。  所有回答均基于提供的文档片段内容，未添加外部信息。 | A | A | A |
| Fusion RAG | HPV初筛是否适用于低收入国家？如果是，为什么？  根据文档内容（文档2），HPV初筛适用于低收入国家，原因如下：  - 是，适用于低收入国家。  - 原因：   - 高敏感性和高阴性预测值：HPV检测比传统细胞学（如巴氏涂片）更敏感，能更准确地识别高风险人群，减少漏诊。   - 允许延长筛查间隔：由于阴性预测值高，HPV初筛可将筛查间隔延长至3-5年，甚至在资源有限地区实现“一生仅筛查1次”，降低医疗负担。   - 成本效益和可行性：HPV检测操作相对简单，易于在基层推广；结合醋酸肉眼观察（VIA）等方法，更适合资源匮乏地区。文档2明确指出：“在撒哈拉非洲以南的低收入国家已广泛实施”，并强调“不同国家应选择因地制宜的筛查方法”。  此结论基于文档2的“宫颈癌的二级预防”部分，讨论HPV初筛在低收入国家的优势。 | A | A | A |
| HyDE | HPV初筛是否适用于低收入国家？如果是，为什么？  答案：是，HPV初筛适用于低收入国家。原因基于上下文信息（HyDE相似度0.591）：  1. 适用性：HPV检测作为初筛方法具有高敏感性和阴性预测值，允许延长筛查间隔（如一生仅筛查1次），适合资源有限地区。  2. 替代方法：在撒哈拉以南非洲等低收入国家，醋酸染色肉眼观察（VIA）被广泛实施，因其简单、可行、成本低。  3. 原则：筛查策略需因地制宜，强调可行性、简单性、准确性和可接受性。  - 引用依据："许多医疗保健系统正开始改用HPV初筛。这种筛查具有更高的敏感性和阴性预测值，允许延长筛查间隔，甚至在低收入国家，一生可仅筛查1次。VIA是在宫颈上涂布新鲜制备的 $3 \%$ ～$5 \%$ 醋酸 $1 ~ \mathrm { m i n }$ 后观察醋白病灶。在撒哈拉非洲以南的低收入国家已广泛实施。不同国家应选择因地制宜的宫颈癌筛查方法"（HyDE相似度0.591）。  所有回答均基于提供的文档片段，未添加外部信息。如您需要更详细的引用位置，可指定具体HyDE相似度片段。 | A | B | A |
| Query Transformation | HPV初筛是否适用于低收入国家？如果是，为什么？  基于文档内容，HPV初筛（以高危型HPV检测作为宫颈癌初筛方法）适用于低收入国家，主要原因包括其高敏感性和成本效益，允许简化筛查程序。具体原因如下：  - 是否适用：是，适用于低收入国家（来源：文档片段3）。  - 为什么适用：   - 更高敏感性和阴性预测值：HPV初筛比传统细胞学检查（如巴氏涂片）更敏感，能更准确地识别高风险人群，减少漏诊。阴性预测值高意味着阴性结果可靠，允许延长筛查间隔（来源：文档片段3）。   - 允许延长筛查间隔：由于高效性，HPV初筛可将筛查间隔延长至3-5年，甚至在资源有限地区实现“一生仅筛查1次”，降低医疗负担（来源：文档片段3）。   - 成本效益高：HPV检测操作相对简单，适合基层医疗；在低收入国家，可结合醋酸肉眼观察（VIA）等低成本方法实施，提高筛查覆盖率（来源：文档片段3）。   - 适合资源匮乏环境：指南强调不同国家应选择“因地制宜”的筛查方法，HPV初筛因其“可行、简单、准确、可接受”，成为低收入国家的优选（来源：文档片段3）。   关键依据：文档片段3指出“许多医疗保健系统正开始改用HPV初筛。这种筛查具有更高的敏感性和阴性预测值，允许延长筛查间隔，甚至在低收入国家，一生可仅筛查1次”和“不同国家应选择因地制宜的宫颈癌筛查方法。选择筛查策略原则是可行、简单、准确、可接受、最高危的女性容易使用”。 | A | A | A |
| SelfRAG | HPV初筛是否适用于低收入国家？如果是，为什么？  根据文档内容，HPV初筛适用于低收入国家，原因如下：  - 是否适用：是，HPV初筛（即使用HPV检测作为初步筛查方法）适用于低收入国家。  - 原因：   - HPV初筛具有更高的敏感性和阴性预测值，这意味着它能更准确地识别高风险人群，并减少假阴性结果。   - 它允许延长筛查间隔（例如，一生可仅筛查一次），这在资源有限的低收入国家（如撒哈拉以南非洲地区）更可行、更经济。   - 文档提到，在低收入国家已广泛实施类似方法（如冰醋酸染色肉眼观察，VIA），并强调筛查策略应因地制宜，选择原则包括可行、简单、准确、可接受和高危女性易用性。  （来源：文档片段中明确说明，例如“许多医疗保健系统正开始改用HPV初筛。这种筛查具有更高的敏感性和阴性预测值，允许延长筛查间隔，甚至在低收入国家，一生可仅筛查1次。VIA...在撒哈拉非洲以南的低收入国家已广泛实施。不同国家应选择因地制宜的宫颈癌筛查方法。选择筛查策略原则是可行、简单、准确、可接受、最高危的女性容易使用。”） | A | A | A |
| Semantic Chunking | HPV初筛是否适用于低收入国家？如果是，为什么？  根据上下文信息（来自文档片段3）：  - 是否适用：是，HPV初筛适用于低收入国家。  - 原因：   - HPV检测具有更高的敏感性和阴性预测值（NPV），允许延长筛查间隔（如一生仅筛查1次），这在资源有限地区更可行。   - HPV初筛方法简单、准确、可接受性强，且易于在最高危女性中实施（如通过醋酸肉眼试验VIA辅助）。   - 上下文指出：“不同国家应选择因地制宜的宫颈癌筛查方法”，并强调原则包括“可行、简单、准确、可接受、最高危的女性容易使用”。HPV初筛符合这些原则，尤其在高负担低收入国家（如撒哈拉以南非洲）已证明有效。   所有回答均基于提供的文档片段内容。如果某个方面未在上下文中明确提及，我已确保引用最相关部分。 | A | B | A |
| NaiveRAG | HPV初筛是否适用于低收入国家？如果是，为什么？  在文档中，HPV初筛（即以HPV检测作为宫颈癌筛查的初始方法）被明确推荐适用于低收入国家。根据上下文（例如相似度0.509的片段），原因包括其高效性、简单性和成本效益：  - 是否适用：是，HPV初筛适用于低收入国家。  - 为什么：   - 更高的敏感性和阴性预测值：HPV检测比传统细胞学（如巴氏涂片）更敏感，能更准确地识别高危人群，减少漏诊。阴性结果可提供高置信度，允许延长筛查间隔（例如一生仅筛查1次），这在资源有限地区尤为重要。   - 可行性和简单性：HPV检测操作简单，不需要高度专业化的实验室或人员，易于在基层医疗中实施。文档提到，醋酸肉眼试验（VIA）等辅助方法在低收入国家（如撒哈拉以南非洲）已广泛使用，与HPV初筛结合可提高效率。   - 成本效益和可接受性：HPV初筛减少了筛查频率和后续检查需求，降低了总体成本。文档强调，筛查策略应“可行、简单、准确、可接受、最高危的女性容易使用”，HPV初筛符合这些原则，尤其适合社会经济欠发达地区。  - 额外说明：在低收入国家，HPV初筛可替代细胞学作为首选方法，结合疫苗接种，有助于消灭宫颈癌。   此信息基于文档中对宫颈癌筛查策略的讨论（例如：“HPV检测及醋酸肉眼试验用于贫困地区的筛查具有更高效率。”；“在低收入国家，一生可仅筛查1次。”；“不同国家应选择因地制宜的宫颈癌筛查方法。”）。 | A | A | A |
| Rerank | HPV初筛是否适用于低收入国家？如果是，为什么？  根据上下文信息（文档片段3和11），HPV初筛适用于低收入国家，原因如下： - 适用性：是。HPV检测作为初筛方法在低收入国家具有优势（片段3：相关性0.9232；片段11：相关性0.7630）。 - 原因：  - 更高敏感性和效率：HPV检测比传统细胞学检查更敏感，能更早发现癌前病变，阴性预测值高，允许延长筛查间隔（如一生仅筛查1次），减少资源消耗（片段3：相关性0.9232）。  - 简单可行：结合醋酸肉眼试验（VIA），方法简便、成本低，无需高级实验室设备，适合资源匮乏地区（片段3：相关性0.9232；片段11：相关性0.7630）。  - 可接受性和覆盖率：易于在社区层面实施，提高高危女性筛查覆盖率，符合“可行、简单、准确、可接受”的原则（片段3：相关性0.9232）。 - 依据：上下文强调，低收入国家应选择因地制宜的筛查方法，HPV初筛和VIA已被广泛应用于撒哈拉以南非洲等地区。 | B | A | A |
| RSE | HPV初筛是否适用于低收入国家？如果是，为什么？  根据上下文信息（相关片段 2），HPV初筛适用于低收入国家，原因如下：  - 是否适用：是，HPV初筛适用于低收入国家。  - 为什么：HPV检测作为初筛方法具有更高的敏感性和阴性预测值，允许延长筛查间隔，从而减少筛查频率和成本。在资源有限的环境中，这可以实现一生仅筛查1次的高效策略。例如，在撒哈拉非洲以南的低收入国家，HPV初筛已被推广，因为它简单、准确、可行，且能针对高危女性群体。  此信息基于相关片段 2（宫颈癌筛查结果异常的管理流程部分，特别是HPV作为初筛的讨论）。 | A | A | A |
| Non-RAG strategy | HPV初筛是否适用于低收入国家？如果是，为什么？  HPV初筛适用于低收入国家，原因如下： - 是否适用：是，HPV初筛（即单独使用HPV检测作为初级筛查方法）被推荐用于低收入国家。 - 为什么：  - 高敏感性和成本效益：HPV检测具有高敏感性（>90%），能有效识别高风险人群，减少漏诊；且操作简便，可通过自采样实现，降低对专业人员和基础设施的依赖。  - 资源优化：在资源有限环境下，HPV初筛比细胞学检查（Pap涂片）更易实施，因为它不需要频繁的实验室支持或高技能人员，适合大规模人群筛查。  - 公共卫生效益：能显著降低宫颈癌发病率和死亡率，尤其当结合分诊策略（如HPV阳性后转诊阴道镜），符合WHO推荐的“筛查-治疗”模式。 | A | A | A |
| **Question 36: 在低收入国家，特别是撒哈拉以南非洲，广泛使用哪些宫颈癌筛查方法？** | | | | |
| Context Enrichment | 在低收入国家，特别是撒哈拉以南非洲，广泛使用哪些宫颈癌筛查方法？  在文档中，明确指出在低收入国家，特别是撒哈拉以南非洲地区，广泛使用醋酸染色肉眼观察（VIA）作为宫颈癌筛查方法。具体描述为：“VIA 是在宫颈上涂布新鲜制备的 $3\%$～$5\%$ 醋酸 $1~\mathrm{min}$ 后观察醋白病灶。在撒哈拉非洲以南的低收入国家已广泛实施。” 这种方法因其简单、低成本、易于在资源匮乏地区实施而被推广，但文档也强调，不同国家应选择因地制宜的筛查策略，确保可行、简单、准确和可接受。 | A | A | A |
| Contextual Chunk Headers | 在低收入国家，特别是撒哈拉以南非洲，广泛使用哪些宫颈癌筛查方法？  回答：在低收入国家，特别是撒哈拉以南非洲地区，广泛使用的宫颈癌筛查方法是VIA（醋酸染色肉眼观察）。根据文档片段9（块主题：HPV疫苗接种与宫颈癌筛查），VIA被描述为一种简单、可行且经济的方法：在宫颈上涂布新鲜制备的3%～5%醋酸1分钟后观察醋白病灶。该方法适用于资源有限地区，因为它不需要复杂设备，且易于在基层实施。文档指出：“VIA 是在宫颈上涂布新鲜制备的 $3 \%$ ～$5 \%$ 醋酸 $1 ~ \mathrm { m i n }$ 后观察醋白病灶。在撒哈拉非洲以南的低收入国家已广泛实施。”此外，文档强调不同国家应选择因地制宜的筛查方法，原则是可行、简单、准确、可接受，并让最高危女性容易使用。  - 依据：文档片段9（块主题：HPV疫苗接种与宫颈癌筛查）。 | A | A | A |
| Context Compression | 在低收入国家，特别是撒哈拉以南非洲，广泛使用哪些宫颈癌筛查方法？  根据文档片段1（相关性: 0.900），在撒哈拉以南非洲的低收入国家，广泛实施的宫颈癌筛查方法包括：  - 冰醋酸染色后用肉眼观察（VIA）：这是在宫颈上涂布新鲜制备的3%～5%醋酸1分钟后观察醋白病灶的方法。  - 其他方法如传统细胞学检查（巴氏涂片）、液基细胞学和HPV检测也被提及，但VIA因其可行、简单、准确、可接受且易于在高危女性中使用，而被强调为广泛实施的方法。  文档强调，不同国家应选择因地制宜的筛查策略，原则是可行、简单、准确、可接受，并确保最高危女性容易使用。 | A | A | A |
| CRAG | 在低收入国家，特别是撒哈拉以南非洲，广泛使用哪些宫颈癌筛查方法？  知识库文档：未明确提及撒哈拉以南非洲的具体筛查方法。  - 网络搜索结果：   - 醋酸染色肉眼观察法（VIA）是撒哈拉以南非洲低收入国家广泛使用的筛查方法，因其操作简单、成本低，适用于资源匮乏地区（来源：网络搜索补充内容）。   - HPV自采样和尿液HPV检测作为替代方案，可提高偏远地区筛查覆盖率（来源：网络搜索补充内容）。  结论：VIA是撒哈拉以南非洲的主要筛查方法，辅以HPV自采样技术。 | A | A | A |
| Document Augmentation | 在低收入国家，特别是撒哈拉以南非洲，广泛使用哪些宫颈癌筛查方法？  根据文档片段8（FIGO 2018妇癌报告解读）和片段16（FIGO指南讨论），在低收入国家，特别是撒哈拉以南非洲地区，广泛使用的宫颈癌筛查方法是醋酸染色肉眼观察（VIA）和HPV检测。这些方法被推荐是因为它们简单、经济、可行，适合资源有限的环境：  - VIA涉及在宫颈上涂抹3%～5%醋酸后观察醋白病灶，操作简便，无需复杂设备（片段8："VIA 是在宫颈上涂布新鲜制备的 $3 \%$ ～$5 \%$ 醋酸 $1 ~ \mathrm { m i n }$ 后观察醋白病灶。在撒哈拉非洲以南的低收入国家已广泛实施。"）。  - HPV检测也被提及作为高效筛查工具，尤其适用于贫困地区（片段16："HPV检测及醋酸肉眼试验用于贫困地区的筛查具有更高效率。"）。  因此，广泛使用的筛查方法包括VIA和HPV检测。 | A | A | A |
| Fusion RAG | 在低收入国家，特别是撒哈拉以南非洲，广泛使用哪些宫颈癌筛查方法？  根据上下文信息，在低收入国家（尤其是撒哈拉以南非洲），广泛使用的宫颈癌筛查方法是醋酸染色肉眼观察（VIA）。文档9（融合分数: 0.3499）明确指出："VIA 是在宫颈上涂布新鲜制备的 3%～5% 醋酸 1 min 后观察醋白病灶。在撒哈拉非洲以南的低收入国家已广泛实施。" 这是因为 VIA 方法简单、经济、易于操作，适合资源有限地区，但敏感性较低，需结合当地实际情况使用。其他方法如细胞学或 HPV 检测在低收入国家应用较少，文档未提及在撒哈拉以南非洲广泛使用其他替代方法。 | A | A | A |
| HyDE | 在低收入国家，特别是撒哈拉以南非洲，广泛使用哪些宫颈癌筛查方法？  基于文档内容，在低收入国家（尤其是撒哈拉以南非洲地区），广泛使用的宫颈癌筛查方法是VIA（醋酸肉眼观察）。具体描述如下：  - 文档指出：“在撒哈拉非洲以南的低收入国家已广泛实施。VIA 是在宫颈上涂布新鲜制备的 $3\% \sim 5\%$ 醋酸 $1 \mathrm{~min}$ 后观察醋白病灶。”（来源：[HyDE相似度: 0.457]）。  - 该方法被推荐是因为其简单、经济、可行，适合资源有限地区，且不需要复杂设备。文档强调，不同国家应选择因地制宜的筛查方法，VIA 在低收入国家作为主要筛查工具。  因此，广泛使用的筛查方法是VIA（醋酸肉眼观察）。 | A | A | A |
| Query Transformation | 在低收入国家，特别是撒哈拉以南非洲，广泛使用哪些宫颈癌筛查方法？  在文档片段10中明确指出："VIA 是在宫颈上涂布新鲜制备的 $3 \%$ ～$5 \%$ 醋酸 $1 ~ \mathrm { m i n }$ 后观察醋白病灶。在撒哈拉非洲以南的低收入国家已广泛实施。" 因此，在低收入国家，特别是撒哈拉以南非洲地区，广泛使用的宫颈癌筛查方法是醋酸染色肉眼观察（VIA）。这是一种简单、低成本的方法，适用于资源匮乏地区。 | A | A | A |
| SelfRAG | 在低收入国家，特别是撒哈拉以南非洲，广泛使用哪些宫颈癌筛查方法？  根据文档内容，在撒哈拉以南非洲等低收入国家，广泛使用的宫颈癌筛查方法是 醋酸染色肉眼观察（VIA）。具体描述为："VIA 是在宫颈上涂布新鲜制备的 $3\% \sim 5\%$ 醋酸 $1 ~ \mathrm{min}$ 后观察醋白病灶。在撒哈拉非洲以南的低收入国家已广泛实施。"（来源：二级预防部分）。该方法因操作简单、成本低而被推广。 | A | A | A |
| Semantic Chunking | 在低收入国家，特别是撒哈拉以南非洲，广泛使用哪些宫颈癌筛查方法？  基于上下文信息： - [文档片段 7]中提到："筛查方法包括传统细胞学检查（巴氏涂片）及液基细胞学、HPV检测、冰醋酸染色后用肉眼观察。VIA是在宫颈上涂布新鲜制备的3%～5%醋酸1min后观察醋白病灶。在撒哈拉非洲以南的低收入国家已广泛实施。"  此外，"不同国家应选择因地制宜的宫颈癌筛查方法"，并强调VIA在资源匮乏地区的适用性。  回答：  在低收入国家，特别是撒哈拉以南非洲地区，广泛使用的宫颈癌筛查方法是VIA（醋酸肉眼试验）。这是一种低成本、简便的方法，通过在宫颈涂抹醋酸后肉眼观察醋白病灶来识别异常。 | A | A | A |
| NaiveRAG | 在低收入国家，特别是撒哈拉以南非洲，广泛使用哪些宫颈癌筛查方法？  在低收入国家，特别是撒哈拉以南非洲地区，广泛使用的宫颈癌筛查方法是醋酸染色肉眼观察（VIA）。文档中提到：“VIA 是在宫颈上涂布新鲜制备的 $3 \%$ ～$5 \%$ 醋酸 $1 ~ \mathrm { m i n }$ 后观察醋白病灶。在撒哈拉非洲以南的低收入国家已广泛实施。” 这强调了VIA作为一种简单、经济且易于实施的筛查方法，在资源有限地区被广泛采用。 | A | C | A |
| Rerank | 在低收入国家，特别是撒哈拉以南非洲，广泛使用哪些宫颈癌筛查方法？  回答： 在低收入国家，特别是撒哈拉以南非洲地区，广泛使用的宫颈癌筛查方法是 VIA（醋酸肉眼观察）。   - 依据上下文：   - 文档片段1（相关性: 0.9658）明确指出："VIA 是在宫颈上涂布新鲜制备的 $3\%$～$5\%$ 醋酸 $1~\mathrm{min}$ 后观察醋白病灶。在撒哈拉非洲以南的低收入国家已广泛实施。"   - 该片段还提到，在资源有限地区，VIA 因其简单、经济、易操作而被推广，符合因地制宜的筛查原则（例如，无需复杂设备，适合基层医疗）。   - 补充说明： 上下文未提及其他方法（如HPV检测或细胞学）在撒哈拉以南非洲的广泛使用，VIA 是主要推荐的低成本筛查工具。 | A | A | A |
| RSE | 在低收入国家，特别是撒哈拉以南非洲，广泛使用哪些宫颈癌筛查方法？  在知识库中未找到答案。  解释： 提供的上下文信息仅讨论中国宫颈癌筛查的现状、挑战和管理策略（如HPV检测、细胞学检查等），未涉及低收入国家或撒哈拉以南非洲地区的筛查方法。上下文片段1提到“醋酸和碘实验的肉眼筛查(VIA/VILI)方法已很少采用”，但这是在中国的背景下，并未扩展到其他地区。 | A | A | A |
| Non-RAG strategy | 在低收入国家，特别是撒哈拉以南非洲，广泛使用哪些宫颈癌筛查方法？  在低收入资源匮乏地区（如撒哈拉以南非洲），广泛使用的宫颈癌筛查方法主要是视觉醋酸检查（VIA）和视觉碘检查（VILI）。这些方法成本低、操作简单，不需要复杂实验室设备，适合初级卫生保健设置。FIGO指南推荐这些方法作为替代策略，以弥补HPV检测或细胞学检查的资源限制。 | A | A | A |
| **Question 37: HPV检测质量控制管理专家共识中包含的关键指标有哪些？** | | | | |
| Context Enrichment | HPV检测质量控制管理专家共识中包含的关键指标有哪些？  在文档中，CSCCP专家共识详细描述了宫颈癌筛查中细胞病理学的质控管理关键指标（针对HPV检测相关部分）。这些指标包括：  1. TBS各级判读的阳性检出率：要求基于超过5000例样本的统计量进行评估。  2. 非典型鳞状上皮细胞/鳞状上皮内病变（ASC/SIL）比值：理想范围为1.5～3.0，用于评估诊断准确性。  3. 不同TBS分级的高危型HPV阳性率：包括ASC-US（$20\%\sim40\%$）、ASC-H（$40\%\sim60\%$）、LSIL（$50\%\sim70\%$）、HSIL（$70\%\sim90\%$）、SCC（>90%），这些比率用于衡量检测质量。  4. 细胞学阳性标本与组织学确诊结果的符合率：要求超过100例阳性标本（如ASC-US、ASC-H、LSIL等）与最终组织病理学诊断（如宫颈切除术或子宫切除术结果）的符合率。  5. 阳性病例的随访登记制度和随访比例：确保病例的追踪管理。  6. 现场督察考核：随机抽取连续10～20例阳性病例、20～30例阴性病例，以及20例室间质控标准片进行现场考核。  这些指标旨在加强细胞学质控，提高HPV检测的可靠性和一致性，以应对我国细胞学医生不足和水平不一的问题。 | A | A | A |
| Contextual Chunk Headers | HPV检测质量控制管理专家共识中包含的关键指标有哪些？  回答：HPV检测质量控制管理专家共识中包含的关键指标主要涉及细胞病理学的质控管理，具体包括以下指标（基于文档片段3，块主题：宫颈癌筛查质控管理）：   1. TBS各级判读的阳性检出率：要求基于超过5000例样本的统计量进行评估。   2. ASC/SIL比值（非典型鳞状上皮细胞/鳞状上皮内病变比值）：理想范围为1.5～3.0，表示质控良好。   3. 不同细胞学异常的高危型HPV阳性率：   - ASC-US：20%～40%   - ASC-H：40%～60%   - LSIL：50%～70%   - HSIL：70%～90%   - SCC：>90%（以上为良好标准）   4. 细胞学阳性标本与组织学确诊的符合率：基于超过100例细胞学阳性标本（包括ASC-US、ASC-H、LSIL、HSIL、SCC、AGC、AIS），与组织学最终确诊结果（如宫颈切除术或子宫切除术后的病理诊断）的符合率。   5. 阳性病例的随访登记制度和随访比例：作为质控的一部分，确保阳性病例得到规范管理。   这些指标旨在评估筛查的准确性和一致性，以加强质量控制。  - 依据：文档片段3（块主题：宫颈癌筛查质控管理）。 | B | B | B |
| Context Compression | HPV检测质量控制管理专家共识中包含的关键指标有哪些？  回答：  HPV检测质量控制管理的关键指标包括以下内容，主要基于CSCCP专家共识：   - 关键指标：   1. TBS判读阳性检出率：需基于>5000例样本统计量。   2. ASC/SIL比值：目标范围为1.5～3.0（良好标准）。   3. 高危型HPV阳性率在不同细胞学结果中的比例：   - ASC-US：20%～40%   - ASC-H：40%～60%   - LSIL：50%～70%   - HSIL：70%～90%   - SCC：>90%   4. 阳性标本与组织学确诊的符合率：>100例阳性标本（包括ASC-US、ASC-H等）与组织病理学诊断（如宫颈切除术后）的符合率。   5. 随访登记制度和随访比例：确保阳性病例的规范随访。   6. 现场督察考核：随机抽取连续10～20例阳性病例、20～30例阴性病例、20例室间质控标准片进行现场考核。 | A | A | A |
| CRAG | HPV检测质量控制管理专家共识中包含的关键指标有哪些？  知识库文档（文档1、3）：   - 细胞学阳性检出率（>5000例样本统计量）。   - ASC/SIL比值（1.5～3.0为良好）。   - TBS分级（ASC-US、LSIL、HSIL等）的高危型HPV阳性率标准（如ASC-US的HPV阳性率应为20%～40%）。   - 细胞学与组织学诊断符合率（>100例阳性标本）。  - 网络搜索结果：   - 阳性预测值（PPV）和阴性预测值（NPV）是HPV检测质控核心指标（来源：子宫颈癌筛查规范专家共识）。   - AI辅助阅片系统要求样本拒收率≤3.5%，阴性样本无需人工复核（来源：网络搜索补充内容）。  结论：关键指标包括阳性率、符合率、PPV/NPV及AI质控参数。 | B | B | B |
| Document Augmentation | HPV检测质量控制管理专家共识中包含的关键指标有哪些？  在提供的文档片段中，没有明确提及HPV检测质量控制管理专家共识的具体关键指标。文档片段3详细讨论了宫颈癌筛查中细胞病理学的质控指标（如TBS判读阳性检出率、ASC/SIL比值等），但这些是针对细胞学检查的，而非专门针对HPV检测的质控。片段2提到HPV检测方法众多且缺乏充分临床验证数据，但未列出质控指标。因此，无法从文档中找到HPV检测质控的关键指标。  回答：在知识库中未找到答案。 | D | D | D |
| Fusion RAG | HPV检测质量控制管理专家共识中包含的关键指标有哪些？  上下文信息中未明确列出专门针对 HPV 检测质量控制管理的关键指标。文档3（融合分数: 0.4720）讨论了宫颈癌筛查中细胞病理学的质控管理，包括一些与 HPV 相关的指标，但这些是针对细胞学整体质控的，而非 HPV 检测的独立质控标准。具体指标包括：  - TBS 各级判读的阳性检出率（基于 >5000 例样本统计量）。  - ASC/SIL 比值（目标范围为 1.5～3.0，视为良好）。  - TBS 分级判读（如 ASC-US、ASC-H、LSIL、HSIL、SCC）的高危型 HPV 阳性率（例如 ASC-US 的 HPV 阳性率为 20%～40%，视为良好）。  - 细胞学阳性标本与组织学最终确诊结果的符合率（基于 >100 例样本）。  由于文档未提供 HPV 检测本身的质控指标（如检测灵敏度、特异性或验证标准），我无法从知识库中找到针对 HPV 检测质控的专家共识关键指标。因此，回答为：知识库中无法找到答案。 | B | B | B |
| HyDE | HPV检测质量控制管理专家共识中包含的关键指标有哪些？  基于文档内容，HPV检测质量控制管理专家共识（主要指细胞病理学质控）中包含的关键指标如下。这些指标来自CSCCP专家共识，旨在确保筛查质量：  1. TBS各级判读的阳性检出率：需基于超过5000例样本的统计量进行评估。  2. ASC/SIL比值：理想范围为1.5～3.0，该比值用于评估判读一致性。  3. 不同TBS分级的高危型HPV阳性率：   - ASC-US：$20\% \sim 40\%$   - ASC-H：$40\% \sim 60\%$   - LSIL：$50\% \sim 70\%$   - HSIL：$70\% \sim 90\%$   - 要求阳性率>90%为良好。  4. 细胞学阳性标本与组织学确诊结果的符合率：针对超过100例细胞学阳性标本（包括ASC-US、ASC-H、LSIL、HSIL、SCC、AGC、AIS），与组织学最终确诊结果（如宫颈切除术后病理）的符合率。  5. 阳性病例的随访登记制度和随访比例：强调随访管理的重要性。  6. 现场督察指标：随机抽取连续10～20例阳性病例、20～30例阴性病例、20例室间质控标准片进行现场考核。  （来源：[HyDE相似度: 0.538] 和 [HyDE相似度: 0.667]）。  因此，关键指标包括以上6项，主要关注阳性率、符合率、比值和随访制度。 | A | A | A |
| Query Transformation | HPV检测质量控制管理专家共识中包含的关键指标有哪些？  在文档片段2中，详细描述了宫颈癌筛查中细胞病理学的质控管理方案，这些方案是专家共识的一部分。关键指标包括： - $\textcircled{1}$ TBS 各级判读的阳性检出率（基于超过5000例样本统计量）。 - $\textcircled{2}$ 非典型鳞状上皮细胞/鳞状上皮内病变（ASC/SIL）比值（良好范围为1.5～3.0）。 - $\textcircled{3}$ TBS 分级判读（如 ASC-US、ASC-H、LSIL、HSIL、SCC）的高危型 HPV 阳性率（例如，ASC-US 为 $20\% \sim 40\%$，ASC-H 为 $40\% \sim 60\%$，LSIL 为 $50\% \sim 70\%$，HSIL 为 $70\% \sim 90\%$，SCC 为 $>90\%$）。 - $\textcircled{4}$ 超过100例细胞学阳性标本（包括 ASC-US、ASC-H、LSIL、HSIL、SCC、AGC、AIS）与组织学最终确诊结果（宫颈切除术或子宫切除术后的病理诊断）的符合率。 - $\textcircled{5}$ 阳性病例的随访登记制度和随访比例（补充自文档片段1）。 - $\textcircled{6}$ 现场督察随机抽取连续10～20例阳性病例、20～30例阴性病例、20例室间质控标准片进行现场考核（补充自文档片段1）。  这些指标旨在确保细胞病理学质量，包括检出率、比值、HPV阳性率、符合率和随访管理。 | A | A | A |
| SelfRAG | HPV检测质量控制管理专家共识中包含的关键指标有哪些？  文档中明确列出了细胞病理学质控管理的关键指标（来源："1 宫颈癌筛查中细胞病理学的质控管理"部分）：  - $\textcircled{1}$ TBS各级判读的阳性检出率：需基于 $>5000$ 例样本统计。  - $\textcircled{2}$ ASC/SIL比值：目标范围为 $1.5 \sim 3.0$（良好标准）。  - $\textcircled{3}$ 不同病变级别的高危型HPV阳性率：   - ASC-US：$20\% \sim 40\%$   - ASC-H：$40\% \sim 60\%$   - LSIL：$50\% \sim 70\%$   - HSIL/SCC：$70\% \sim 90\%$（$>90\%$ 为良好）。  - $\textcircled{4}$ 细胞学与组织学符合率：针对 $>100$ 例阳性标本（如ASC-US、HSIL等），需与术后组织病理学诊断对比。  - $\textcircled{5}$ 阳性病例的随访登记制度和随访比例。  - $\textcircled{6}$ 现场督察：随机抽取病例进行现场考核（如 $10 \sim 20$ 例阳性病例）。 | B | A | A |
| Semantic Chunking | HPV检测质量控制管理专家共识中包含的关键指标有哪些？  基于上下文信息： - [文档片段 2]详细描述了CSCCP专家共识中的质控方案："具体介绍了质控方案和内容，包括通过数据库及相关文档回顾性评价以下指标标准:   ① TBS各级判读的阳性检出率(>5000例样本统计量);   ② ASC/SIL比值(1.5～3.0为良好);   ③ TBS分级判读为ASC-US、ASC-H、LSIL、HSIL、SCC的高危型HPV阳性率分别为20%～40%、40%～60%、50%～70%、70%～90%、>90%以上为良好;   ④ >100例细胞学阳性标本（包括ASC-US、ASC-H、LSIL、HSIL、SCC、AGC、AIS）与组织学最终确诊结果的符合率;   ⑤ 阳性病例的随访登记制度和随访比例;   ⑥ 现场督察随机抽取连续10～20例阳性病例、20～30例阴性病例、20例室间质控标准片作现场考核。"  回答：  HPV检测质量控制管理专家共识中包含的关键指标包括：  1. TBS判读的阳性检出率（需基于>5000例样本）。  2. ASC/SIL比值（目标范围为1.5～3.0）。  3. TBS不同分级（如ASC-US、ASC-H等）的高危型HPV阳性率（具体标准值见上文）。  4. 细胞学阳性标本与组织学确诊结果的符合率（需>100例）。  5. 阳性病例的随访登记制度和随访比例。  6. 现场督察（随机抽查病例进行考核）。 | A | A | A |
| NaiveRAG | HPV检测质量控制管理专家共识中包含的关键指标有哪些？  HPV检测质量控制管理专家共识中包含的关键指标包括以下内容（基于文档中描述的质控方案）： - TBS各级判读的阳性检出率：要求基于超过5000例样本的统计量进行评估。 - ASC/SIL比值：理想范围为1.5～3.0，表示质控良好。 - 不同细胞学分级的高危型HPV阳性率：具体包括：  - ASC-US：20%～40%  - ASC-H：40%～60%  - LSIL：50%～70%  - HSIL：70%～90%  - 阳性率超过90%被视为良好。 - 细胞学阳性标本与组织学确诊结果的符合率：要求基于超过100例细胞学阳性标本（包括ASC-US、ASC-H、LSIL、HSIL、SCC、AGC、AIS），与最终组织病理学诊断（如宫颈切除术或子宫切除术结果）的符合率进行评估。 这些指标旨在确保HPV检测的准确性和一致性，文档来源为CSCCP专家共识对细胞病理学质控的描述。 | B | A | B |
| Rerank | HPV检测质量控制管理专家共识中包含的关键指标有哪些？  回答： HPV检测质量控制管理专家共识中包含的关键指标包括 阳性检出率、ASC/SIL比值、HPV阳性率、组织学符合率、随访比例和现场考核。这些指标主要用于评估细胞病理学质控，确保HPV检测的准确性和可靠性。   - 依据上下文：   - 文档片段7（相关性: 0.5579）详细描述了CSCCP专家共识的质控方案："具体介绍了质控方案和内容，包括通过数据库及相关文档回顾性评价以下指标标准:   $\textcircled{1}$ TBS 各级判读的阳性检出率( $>5000$ 例样本统计量) ;   $\textcircled{2}$ 非典型鳞状上皮细胞/鳞状上皮内病变( ASC/SIL) 比值( 1.5～3.0 为良好) ;   $\textcircled{3}$ TBS 分级判读为 ASC-US、ASC-H、LSIL、HSIL、SCC 的高危型 HPV 阳性率分别为 $20\%\sim40\%$、$40\%\sim60\%$、$50\%\sim70\%$、$70\%\sim90\%$·$>90\%$ 以上为良好;   $\textcircled{4} >100$ 例细胞学阳性标本...与组织学最终确诊结果...的符合率;   $\textcircled{5}$ 阳性病例的随访登记制度和随访比例;   $\textcircled{6}$ 现场督察随机抽取连续 10～20 例阳性病例、20～30 例阴性病例、20 例室间质控标准片作现场考核。"   - 补充说明： 这些指标来自中国CSCCP共识，强调通过数据回顾和现场考核来监控HPV检测质量，确保筛查的有效性。上下文未提及其他特定HPV检测质控指标，因此以上为完整列表。 | A | A | A |
| RSE | HPV检测质量控制管理专家共识中包含的关键指标有哪些？  基于上下文信息，HPV检测质量控制管理的关键指标主要包含在宫颈癌筛查中细胞病理学的质控方案中（来自片段1）。这些指标旨在确保筛查的准确性和可靠性，具体包括：  1. TBS各级判读的阳性检出率：要求基于超过5000例样本的统计量进行评估。  2. ASC/SIL比值：目标范围为1.5～3.0，此比值用于评估细胞学诊断的合理性（ASC代表非典型鳞状上皮细胞，SIL代表鳞状上皮内病变）。  3. TBS分级判读的高危型HPV阳性率：针对不同细胞学结果（ASC-US、ASC-H、LSIL、HSIL、SCC），HPV阳性率应分别达到以下标准为良好：   - ASC-US：20%～40%   - ASC-H：40%～60%   - LSIL：50%～70%   - HSIL：70%～90%   - SCC：>90%  4. 阳性病例与组织学最终确诊结果的符合率：要求基于超过100例细胞学阳性标本（包括ASC-US、ASC-H、LSIL、HSIL、SCC、AGC、AIS）进行评价，比较细胞学结果与宫颈切除术或子宫切除术后的组织病理学诊断一致性。  5. 阳性病例的随访登记制度和随访比例：强调建立随访机制并监控随访率。  6. 现场督察考核：随机抽取连续10～20例阳性病例、20～30例阴性病例，以及20例室间质控标准片进行现场考核。  注意： 这些指标是上下文针对“细胞病理学的质控管理”提出的，并非专门针对HPV检测的独立质控。但HPV阳性率作为关键组成部分被纳入，以评估HPV检测在筛查中的表现。 | A | A | A |
| Non-RAG strategy | HPV检测质量控制管理专家共识中包含的关键指标有哪些？  HPV检测质量控制管理的关键指标包括：敏感性（检测真阳性病例的能力）、特异性（检测真阴性病例的能力）、阳性预测值（PPV）、阴性预测值（NPV）、重复性（检测结果的一致性）、以及实验室间的可比性（确保不同实验室结果可靠）。这些指标旨在确保HPV检测的准确性和标准化，减少假阳性和假阴性结果。 | A | A | A |
| **Question 38: ASC-US和ASC-H在临床管理上有什么区别？** | | | | |
| Context Enrichment | ASC-US和ASC-H在临床管理上有什么区别？  在文档中，ASC-US（不明确意义的非典型鳞状上皮细胞）和ASC-H（非典型鳞状上皮细胞不除外高度鳞状上皮内病变）在临床管理上有明显区别：  - ASC-US的管理：ASC-US诊断重复性差，易发生诊断不足或过度诊断。文档指出：“对 ASC-US 使用HPV 进行分流，如果 HPV 阳性（不分型）或 HPV 分型检测 HPV16、18 阳性，均应转诊阴道镜检查。” 如果无法进行HPV检测，可直接行阴道镜检查。ASC-US的恶性风险较低（最终诊断为CIN II/III的概率<10%，浸润癌仅0.1%～0.2%），因此管理依赖于HPV分流决策。  - ASC-H的管理：ASC-H的细胞改变具有HSIL特征，被诊断为CIN II/III的概率较高（24%～94%）。文档明确表示：“对于细胞学异常的 ASC-H、LSIL、HSIL、AGC 均应转诊阴道镜。” 这意味着ASC-H无需HPV分流，直接转诊阴道镜，因其风险更高。  总之，区别在于ASC-US需要HPV检测分流来决定是否转诊阴道镜，而ASC-H直接转诊阴道镜。 | A | A | A |
| Contextual Chunk Headers | ASC-US和ASC-H在临床管理上有什么区别？  回答：ASC-US（不明确意义的非典型鳞状上皮细胞）和ASC-H（非典型鳞状上皮细胞不除外高度鳞状上皮内病变）在临床管理上有显著区别，主要基于其风险和处理流程（基于文档片段10和11）：   - ASC-US管理：   - 首选进行HPV检测分流：   - 如果HPV阳性（不分型或分型检测HPV16/18阳性），转诊阴道镜检查。   - 如果HPV阴性，建议1年后复查细胞学检查；若复查结果≥ASC-US，则转诊阴道镜。   - 无法进行HPV检测时，直接转诊阴道镜检查。   - 理由：ASC-US诊断重复性差，易发生诊断不足或过度，高危型HPV感染率为31%～60%，但进展为高级别病变的风险较低（约10%）。   - ASC-H管理：   - 直接转诊阴道镜检查，无需HPV分流。   - 理由：ASC-H的细胞改变具有HSIL特征，被诊断为CIN II/III的概率较高（24%～94%），表明其进展风险更高，需更积极的评估。   总结：ASC-US依赖HPV检测进行分流决策，而ASC-H因高风险直接进入阴道镜检查。  - 依据：文档片段10（块主题：HPV阳性及细胞学异常处理流程）和文档片段11（块主题：细胞学异常处理指南）。 | A | B | B |
| Context Compression | ASC-US和ASC-H在临床管理上有什么区别？  根据文档片段2（相关性: 0.800）、片段7（相关性: 0.700）和片段10（相关性: 0.700），ASC-US（非典型鳞状细胞-意义不明）和ASC-H（非典型鳞状细胞-不排除高级别鳞状上皮内病变）在临床管理上有显著区别：  - ASC-US的管理：   - 首先进行HPV检测分流：   - 如果HPV阳性（不分型或分型检测HPV16/18阳性），应转诊阴道镜检查。   - 如果HPV阴性，则1年后复查细胞学检查（重复联合检测）。   - 这是一种基于HPV结果的分流策略，因为ASC-US代表低风险不确定性。  - ASC-H的管理：   - ASC-H的细胞改变具有高级别鳞状上皮内病变（HSIL）的特征，被诊断宫颈上皮内瘤变（CIN）I/II的概率较高（24%~94%）。   - 对于普通患者（非特殊人群），通常直接转诊阴道镜检查，无需HPV分流。根据转化区类型（TZ）进一步处理：   - TZ3（转化区不可见）：进行阴道镜检查。   - TZ1/2（转化区部分或完全可见）：进行诊断性宫颈切除术±颈管搔刮术（ECC）。   - 对于特殊人群（如21-24岁患者或妊娠期），管理更保守，包括密切监测（如每6-12周复查）以排除浸润癌。  总之，ASC-US依赖HPV检测分流，而ASC-H因高级别病变风险高，通常直接转诊阴道镜或根据情况处理。 | A | A | A |
| CRAG | ASC-US和ASC-H在临床管理上有什么区别？  知识库文档（文档2）：   - ASC-US：   - HPV分流：若HPV阳性→转阴道镜；HPV阴性→1年后复查。   - 无法HPV检测时→直接转阴道镜（图2流程）。   - ASC-H：   - 直接转诊阴道镜检查（无需HPV分流），因进展为≥CINⅡ的风险达24%～94%。  - 网络搜索结果：   - 验证ASC-US需HPV分流，ASC-H需立即阴道镜（来源：子宫颈癌筛查规范专家共识）。  结论：ASC-US依赖HPV分流，ASC-H需直接阴道镜检查。 | B | A | A |
| Document Augmentation | ASC-US和ASC-H在临床管理上有什么区别？  根据文档片段9（图2处理流程）和片段10（细胞学异常的处理流程），ASC-US（意义不明的非典型鳞状细胞）和ASC-H（非典型鳞状细胞，不除外高度鳞状上皮内病变）在临床管理上有显著区别：  - ASC-US的管理：需要先进行HPV检测分流。如果HPV阳性（不分型或分型检测HPV16/18阳性），则转诊阴道镜检查；如果HPV阴性，则建议1年后复查细胞学检查（片段9："ASC-US患者：首先应进行HPV检测：若HPV阳性（+）→转诊阴道镜检查；若HPV阴性（-）→1年后应复查"；片段10："对 ASC-US 使用HPV 进行分流，如果 HPV 阳性( 不分型) 或 HPV 分型检测 HPV16、18 阳性，均应转诊阴道镜检查"）。  - ASC-H的管理：直接转诊阴道镜检查，无需HPV检测分流。这是因为ASC-H的细胞改变具有高度鳞状上皮内病变（HSIL）的特征，被诊断为CIN II/III的概率较高（24%～94%），因此需要更积极的评估（片段9："其他异常类型患者（ASC-H,LSIL,HSIL,AGC）直接转诊阴道镜检查"；片段10："对于细胞学异常的 ASC-H、LSIL、HSIL、AGC 均应转诊阴道镜"）。  综上，核心区别是ASC-US依赖HPV检测结果决定后续步骤，而ASC-H直接转诊阴道镜。 | A | A | A |
| Fusion RAG | ASC-US和ASC-H在临床管理上有什么区别？  根据上下文信息，ASC-US（意义不明的非典型鳞状细胞）和 ASC-H（非典型鳞状细胞，不除外高度鳞状上皮内病变）在临床管理上有显著区别，主要基于其恶性风险和分流策略。文档1（融合分数: 0.6000）和文档10（融合分数: 0.3492）详细描述了处理流程：  - ASC-US 管理：   - 优先使用 HPV 检测进行分流：如果 HPV 阳性（不分型或分型检测 HPV16/18 阳性），则转诊阴道镜检查；如果 HPV 阴性，则建议 1 年后复查细胞学（文档1, 2.2.2 部分）。   - 若无法进行 HPV 检测，则直接转诊阴道镜检查（文档10）。   - 理由：ASC-US 诊断重复性差，高危型 HPV 感染率为 31%～60%，进展为高级别病变的风险较低，因此 HPV 分流可避免不必要的阴道镜。  - ASC-H 管理：   - 直接转诊阴道镜检查，无需 HPV 分流（文档1, 2.2.3 部分）。   - 理由：ASC-H 被诊断为 CIN II/III 的概率较高（24%～94%），表明其恶性风险更高，需立即进一步评估。  文档12（融合分数: 0.3234）的流程图也支持此区别：ASC-US 需 HPV 检测分流，而 ASC-H 直接进入阴道镜路径。 | A | A | A |
| HyDE | ASC-US和ASC-H在临床管理上有什么区别？  基于文档内容，ASC-US（意义不明的非典型鳞状上皮细胞）和ASC-H（非典型鳞状上皮细胞不除外高度鳞状上皮内病变）在临床管理上有显著区别，主要基于其风险水平和处理流程：  - ASC-US的管理：   - 优先使用HPV检测进行分流：   - 如果HPV阳性（不分型或分型检测HPV16/18阳性），则转诊阴道镜检查。   - 如果HPV阴性，则建议1年后复查细胞学；若复查阴性，转为常规筛查；若复查≥ASC-US，则转阴道镜。   - 无法进行HPV检测时，直接转诊阴道镜检查。   - 理由：ASC-US诊断重复性差，高危型HPV感染率为$31\% \sim 60\%$，但进展为高级别病变的风险较低（约10%），因此HPV分流可避免过度诊疗。  - ASC-H的管理：   - 直接转诊阴道镜检查，无需HPV分流。   - 理由：ASC-H的细胞改变具有HSIL特征，被诊断为CIN II/III的概率较高（$24\% \sim 94\%$），因此视为高风险，需立即阴道镜评估。  （来源：[HyDE相似度: 0.435] 和 [HyDE相似度: 0.435] 中的“细胞学异常的处理流程”描述）。  因此，核心区别在于ASC-US需HPV检测分流，而ASC-H直接转阴道镜。 | A | A | A |
| Query Transformation | ASC-US和ASC-H在临床管理上有什么区别？  在文档片段11和片段14（图二描述）中，详细说明了 ASC-US（意义不明的非典型鳞状细胞）和 ASC-H（非典型鳞状细胞，不除外高度鳞状上皮内病变）的临床管理差异： - ASC-US：首先进行高危型 HPV 检测分流：  - 如果 HPV 阳性（不分型或分型检测），则转诊阴道镜检查。  - 如果 HPV 阴性，则建议1年后复查细胞学检查；如果复查结果阴性，则后续进行常规筛查；如果复查结果 ≥ ASC-US，则转诊阴道镜检查。  - 如果无法进行 HPV 检测，则直接转诊阴道镜检查。 - ASC-H：由于 ASC-H 的细胞改变具有高度鳞状上皮内病变（HSIL）的特征，且被诊断为 CIN II/III 的概率较高（$24\% \sim 94\%$），因此应直接转诊阴道镜检查，无需 HPV 分流。  综上，ASC-US 的管理依赖于 HPV 检测分流，而 ASC-H 的管理是直接转诊阴道镜，反映了其更高的恶性风险。 | B | A | A |
| SelfRAG | ASC-US和ASC-H在临床管理上有什么区别？  文档明确区分了ASC-US和ASC-H的管理流程（来源："2.2.2 ASC-US"及图2处理流程）：  - ASC-US：   - 首选进行高危型HPV检测分流：   - HPV阳性 → 转诊阴道镜。   - HPV阴性 → 1年后复查细胞学（若复查结果 $\geq$ ASC-US，则转阴道镜）。   - 若无法进行HPV检测，直接转诊阴道镜。  - ASC-H：   - 作为更高级别异常，无需HPV分流，直接转诊阴道镜检查（见图2流程："其他异常类型（ASC-H、LSIL等）直接转诊阴道镜"）。 | A | A | A |
| Semantic Chunking | ASC-US和ASC-H在临床管理上有什么区别？  基于上下文信息： - ASC-US (Atypical Squamous Cells of Undetermined Significance)：   - [文档片段 2]、[文档片段 3]、[文档片段 5]和[文档片段 25]指出，ASC-US的处理采用HPV分流策略：   - HPV阳性（不分型）或HPV分型检测HPV16/18阳性时，转诊阴道镜检查。   - HPV阴性时，建议1年后复查细胞学；无法进行HPV检测时，直接转诊阴道镜检查。   - ASC-US的CIN II/III风险较低（约<10%），因此优先使用HPV分流以减少不必要的阴道镜转诊。   - ASC-H (Atypical Squamous Cells, cannot exclude High-grade Squamous Intraepithelial Lesion)：   - [文档片段 25]明确说明："对于细胞学异常的ASC-H...均应转诊阴道镜。"   ASC-H被诊断为CIN II/III的概率较高（24%～94%），因此不依赖HPV分流，直接转诊阴道镜检查。  回答：  ASC-US和ASC-H在临床管理上的主要区别在于是否使用HPV分流策略：  - ASC-US：采用HPV分流管理。如果HPV阳性或分型HPV16/18阳性，则转诊阴道镜；如果HPV阴性，则1年后复查；无法做HPV检测时直接转诊阴道镜。  - ASC-H：不进行HPV分流，直接转诊阴道镜检查，因为其高级别病变风险显著更高。 | A | A | A |
| NaiveRAG | ASC-US和ASC-H在临床管理上有什么区别？  ASC-US（不明确意义的非典型鳞状上皮细胞）和ASC-H（非典型鳞状上皮细胞不除外高度鳞状上皮内病变）在临床管理上有显著区别，基于文档中的处理流程： - ASC-US的管理：通常进行HPV检测分流。如果HPV检测阳性（不分型或分型检测HPV16/18阳性），则转诊阴道镜检查；如果HPV阴性，则建议1年后复查细胞学。如果无法进行HPV检测，则直接转诊阴道镜检查。文档指出：“ASC-US 使用HPV 进行分流，如果 HPV 阳性( 不分型) 或 HPV 分型检测 HPV16、18 阳性，均应转诊阴道镜检查。” - ASC-H的管理：直接转诊阴道镜检查，无需先进行HPV检测。因为ASC-H的细胞改变具有HSIL的特征，被诊断为CIN II/III的概率较高（24%～94%），文档强调：“ASC-H 的细胞改变具有 HSIL 的特征，被诊断 CIN $\mathbb { I } / \mathbb { I }$ 的概率为 $2 4 \% \sim$ $9 4 \%$”，因此需立即阴道镜检查。 总之，ASC-US依赖HPV检测分流，而ASC-H直接进入阴道镜检查，反映了其更高的癌变风险。 | A | A | A |
| Rerank | ASC-US和ASC-H在临床管理上有什么区别？  回答： ASC-US（意义不明的非典型鳞状细胞）和ASC-H（非典型鳞状细胞，不除外高度鳞状上皮内病变）在临床管理上的主要区别在于 分流策略：   - ASC-US管理： 优先进行HPV检测分流。   - 如果HPV阳性（+），则转诊阴道镜检查。   - 如果HPV阴性（-），则建议1年后复查细胞学（若复查结果≥ASC-US，则转诊阴道镜；若阴性，则常规筛查）。   - 无法进行HPV检测时，直接转诊阴道镜。   - ASC-H管理： 直接转诊阴道镜检查，无需HPV分流。   - 依据上下文：   - 文档片段10（相关性: 0.2659）和片段16（相关性: 0.2048）描述了筛查异常管理流程：   - 片段10："ASC-US 诊断重复性差...ASC-US 女性中高危型 HPV 感染率为 $31\%\sim60\%$...对于ASC-US，应进行HPV检测：若HPV阳性，转诊阴道镜；若HPV阴性，1年后复查。"   - 片段16："细胞学 ASC-H...直接转诊阴道镜检查。"   - 片段10的图2（文本描述）明确区分：ASC-US需HPV分流，而ASC-H等高危类型直接阴道镜。   - 补充说明： 这种区别基于ASC-H的癌变风险更高（HPV阳性率 $40\%\sim60\%$，片段7），而ASC-US风险较低，HPV分流可减少不必要的阴道镜检查。 | B | A | A |
| RSE | ASC-US和ASC-H在临床管理上有什么区别？  基于上下文信息（主要来自片段1和片段2），ASC-US（非典型鳞状上皮细胞）和ASC-H（非典型鳞状上皮细胞不除外高度鳞状上皮内病变）在临床管理上的区别主要体现在风险分层和处理流程上：  - ASC-US的管理：   - ASC-US诊断重复性差，易发生诊断不足或过度诊断，在人群筛查中约占5%，且高危型HPV感染率为31%～60%。   - 在筛查异常管理流程中（如以HPV检测或联合筛查作为初筛），ASC-US通常需要结合HPV检测结果进行分流：   - 如果HPV检测阳性（尤其是不分型时），支持直接转诊阴道镜检查（片段2，2.3.2部分提到：HPV阳性/ASC-US的5年CINⅢ+累积风险为6.8%，高于LSIL风险，依据同等风险同等管理原则，支持直接转诊阴道镜）。   - 如果HPV检测阴性，可能建议常规随访（如1年复查）。  - ASC-H的管理：   - ASC-H被视为更高风险类别，其高危型HPV阳性率为40%～60%（片段1），表明进展为高级别病变的可能性更高。   - 在管理流程中，ASC-H通常更积极，支持直接转诊阴道镜检查，无需HPV分流（片段2的图3描述中，细胞学结果≥ASC-US时直接转诊阴道镜；ASC-H属于此类）。  总结区别： ASC-US管理依赖HPV检测分流（阳性时转阴道镜），而ASC-H因风险更高，管理更直接（通常立即转阴道镜）。上下文强调，这需结合患者年龄、依从性等因素个体化处理。 | A | A | A |
| Non-RAG strategy | ASC-US和ASC-H在临床管理上有什么区别？  ASC-US（非典型鳞状细胞-未明确意义）和ASC-H（非典型鳞状细胞-不能排除高级别鳞状上皮内病变）在临床管理上的主要区别如下： - ASC-US：推荐使用HPV检测进行分流管理。如果HPV阳性，则进行阴道镜检查；如果HPV阴性，则建议3年随访（重复联合筛查或HPV单独检测）。管理基于风险分层，避免不必要的阴道镜。 - ASC-H：直接推荐阴道镜检查，无需HPV分流，因为ASC-H与高级别鳞状上皮内病变（HSIL）风险较高（约24-68%），需及时评估以排除癌前病变或癌症。 | A | A | A |
| **Question 39: 对于阴道镜检查无异常的患者是否仍需要四象限取样？** | | | | |
| Context Enrichment | 对于阴道镜检查无异常的患者是否仍需要四象限取样？  在文档中，针对阴道镜检查无异常的患者，专家共识不建议常规进行四象限取样。具体描述为：“鉴于我国阴道镜医师的水平不一，缺乏微小活检钳（$2\sim3~\mathrm{mm}$），对于阴道镜下未发现异常而行四象限取材要慎重，推荐阴道镜指示下有目标的多点活检。” 这表示，四象限取材（即随机在宫颈四个象限取活检）应避免，因为它可能增加不必要的创伤和误诊风险；相反，推荐在阴道镜指导下进行有目标的多点活检（即针对可疑区域取样），以平衡诊断准确性和患者安全。 | A | A | A |
| Contextual Chunk Headers | 对于阴道镜检查无异常的患者是否仍需要四象限取样？  回答：对于阴道镜检查无异常的患者，不需要常规进行四象限取样，应慎重对待。根据文档片段2（块主题：阴道镜检查操作规范），专家共识推荐在阴道镜指示下有目标的多点活检，而非盲目四象限取材。原因包括：   - 我国阴道镜医师水平不一，且缺乏微小活检钳（2～3 mm），四象限取材可能导致不必要的组织损伤或假阴性。   - 文档明确指出：“对于阴道镜下未发现异常而行四象限取材要慎重，推荐阴道镜指示下有目标的多点活检。”   因此，管理策略强调基于阴道镜下的具体发现进行针对性活检，避免过度诊疗。  - 依据：文档片段2（块主题：阴道镜检查操作规范）。 | A | A | A |
[truncated: 973,528 more chars]
